# Supplementary material for: Differential requirements for mitochondrial electron transport chain components in the adult murine liver
Source: eLife. 2022 Sep 26;11:e80919. doi: 10.7554/eLife.80919 (PMC9648974; doi:10.7554/eLife.80919)
Supplement: Supplementary file 1. [file elife-80919-supp1.xlsx]

## Sheet: SuppFile1
Supplementary File 1 - Proteomics and Metabolomics Analysis of complex I deficient livers at 4 weeks post-AAV administration.
Tables
	WCL Proteomics Ndufa9 data				Raw data and information from proteomics analysis of ndufa9-/- vs. ndufa9f/f liver lysate.
	WCL Proteomics Ndufa9 stats				Statistics of differential abundance from proteomic analysis of ndufa9-/- vs. ndufa9f/f liver lysate.
	WCL Proteomics Ndufa9 sig				List and statistical data for significantly upregulated and downregulated proteins in ndufa9-/- vs. ndufa9f/f lysate.
	WCL Proteomics Ndufa9 oxphos				List and statistical data for mitochondrial OXPHOS proteins in ndufa9-/- vs. ndufa9f/f lysate.
	Mito Proteomics Ndufa9 data				Raw data and information from proteomics analysis of ndufa9-/- vs. ndufa9f/f enriched mitochondria.
	Mito Proteomics Ndufa9 stats				Statistics of differential abundance from proteomic analysis of ndufa9-/- vs. ndufa9f/f enriched mitochondria.
	Mito Proteomics Ndufa9 sig				List and statistical data for significantly upregulated and downregulated proteins in ndufa9-/- vs. ndufa9f/f enriched mitochondria.
	Mito Proteomics Ndufa9 oxphos				List and statistical data for mitochondrial OXPHOS proteins in ndufa9-/- vs. ndufa9f/f enriched mitochondria.
	Metabolomics Ndufa9 data				Processed metabolomics data from analysis of ndufa9-/- vs. ndufa9f/f liver tissue.
	Metabolomics Ndufa9 stats				Statistics of differential abundance from metabolomics analysis of ndufa9-/- vs. ndufa9f/f liver tissue.
	Metabolic Tracing data				Processed tracing data from [U-13C]glucose infusions in ndufa9f/f and ndufa9-/- animals.

## Sheet: WCL Proteomics Ndufa9 data
UniprotKB Accession	EntrezID	Gene Name	MitoCarta3.0	Description	% Coverage	# Peptides	# PSMs	# Unique Peptides	Sum PEP Score	Score Sequest HT: Sequest HT	# Peptides (by Search Engine): Sequest HT	MW in kDa	Protein Abundances per replicate													Peptide count per replicate												Unique Peptide count per replicate
													ndufa9f/f #1	ndufa9f/f #2	ndufa9f/f #3	ndufa9f/f #3	ndufa9f/f #4	ndufa9f/f #5	ndufa9f/f #6	ndufa9-/- #1	ndufa9-/- #2	ndufa9-/- #3	ndufa9-/- #4	ndufa9-/- #5	ndufa9-/- #6	ndufa9f/f #1	ndufa9f/f #2	ndufa9f/f #3	ndufa9f/f #4	ndufa9f/f #5	ndufa9f/f #6	ndufa9-/- #1	ndufa9-/- #2	ndufa9-/- #3	ndufa9-/- #4	ndufa9-/- #5	ndufa9-/- #6	ndufa9f/f #1	ndufa9f/f #2	ndufa9f/f #3	ndufa9f/f #4	ndufa9f/f #5	ndufa9f/f #6	ndufa9-/- #1	ndufa9-/- #2	ndufa9-/- #3	ndufa9-/- #4	ndufa9-/- #5	ndufa9-/- #6
P02088	15129	Hbb-b1	FALSE	Hemoglobin subunit beta-1 OS=Mus musculus OX=10090 GN=Hbb-b1 PE=1 SV=2	100	27	6336	17	217.124	16309.6	27	15.8	7.09032e+09	1.8166e+10	1.62666e+10	1.62666e+10	1.21961e+10	2.06687e+10	1.50023e+10	8.85177e+09	9.92081e+09	1.99084e+10	1.8493e+10	7.52873e+09	1.3378e+10	23	21	22	18	19	19	22	22	22	25	22	23	13	11	12	10	12	11	12	12	12	15	12	13
P01942	15122	Hba-a1	FALSE	Hemoglobin subunit alpha OS=Mus musculus OX=10090 GN=Hba PE=1 SV=2	100	20	5193	20	184.778	11849.2	20	15.1	6.8342e+09	1.73292e+10	1.58888e+10	1.58888e+10	1.13345e+10	2.03802e+10	1.25624e+10	8.85396e+09	9.25618e+09	1.95557e+10	1.76278e+10	8.44571e+09	1.14297e+10	17	19	18	17	20	18	18	19	19	20	18	20	17	19	18	17	20	18	18	19	19	20	18	20
Q99PL5	81910	Rrbp1	FALSE	Ribosome-binding protein 1 OS=Mus musculus OX=10090 GN=Rrbp1 PE=1 SV=2	75	103	4072	103	544.22	11510.9	103	172.8	1.34756e+09	1.93403e+09	2.69149e+09	2.69149e+09	1.30977e+09	1.52687e+09	1.01774e+09	1.93535e+09	2.25035e+09	1.46672e+09	1.3834e+09	2.34427e+09	1.77992e+09	96	91	102	95	92	91	95	94	89	93	96	92	96	91	102	95	92	91	95	94	89	93	96	92
P02089	15130	Hbb-b2	FALSE	Hemoglobin subunit beta-2 OS=Mus musculus OX=10090 GN=Hbb-b2 PE=1 SV=2	97	25	3309	15	175.627	7600.36	25	15.9	8.7729e+08	4.06147e+09	2.0008e+09	2.0008e+09	1.07253e+08	1.73573e+08	1.24276e+08	1.19788e+09	1.22426e+09	3.72757e+09	1.91658e+09	9.69359e+08	1.7891e+09	21	23	22	15	15	14	22	22	22	23	22	24	11	13	12	7	8	6	12	12	12	13	12	14
P16546	20740	Sptan1	FALSE	Spectrin alpha chain, non-erythrocytic 1 OS=Mus musculus OX=10090 GN=Sptan1 PE=1 SV=4	76	184	3175	183	1166.14	9513.93	184	284.4	9.98666e+08	1.25834e+09	1.82097e+09	1.82097e+09	1.08597e+09	1.37918e+09	9.88648e+08	1.18137e+09	1.30145e+09	1.48062e+09	1.11576e+09	1.50277e+09	1.36137e+09	175	176	180	178	180	177	174	180	178	174	178	180	174	175	179	177	179	176	173	179	177	173	177	179
P12710	14080	Fabp1	TRUE	Fatty acid-binding protein, liver OS=Mus musculus OX=10090 GN=Fabp1 PE=1 SV=2	91	23	2779	23	174.62	8045.94	23	14.2	6.54524e+09	8.79507e+09	5.67404e+09	5.67404e+09	6.11131e+09	7.75671e+09	5.94782e+09	5.22294e+09	5.4793e+09	9.93145e+09	7.27386e+09	5.61285e+09	6.90942e+09	23	23	23	23	23	23	23	22	23	23	23	23	23	23	23	23	23	23	23	22	23	23	23	23
P09103	18453	P4hb	FALSE	Protein disulfide-isomerase OS=Mus musculus OX=10090 GN=P4hb PE=1 SV=2	78	53	2478	53	285.434	7467.25	53	57	3.35876e+09	4.27548e+09	2.47441e+09	2.47441e+09	2.78987e+09	3.32235e+09	3.10483e+09	1.96176e+09	2.43798e+09	4.70705e+09	3.53781e+09	1.50079e+09	3.20034e+09	51	50	46	49	49	49	48	47	49	48	45	51	51	50	46	49	49	49	48	47	49	48	45	51
P63038	15510	Hspd1	TRUE	60 kDa heat shock protein, mitochondrial OS=Mus musculus OX=10090 GN=Hspd1 PE=1 SV=1	85	54	2062	54	371.901	7080.62	54	60.9	1.32981e+09	1.75134e+09	6.01996e+08	6.01996e+08	1.2987e+09	2.33245e+09	1.99985e+09	6.07989e+08	5.76808e+08	4.76849e+09	2.31759e+09	5.31451e+08	1.24493e+09	49	48	42	50	48	51	42	44	52	52	42	50	49	48	42	50	48	51	42	44	52	52	42	50
P08228	20655	Sod1	TRUE	Superoxide dismutase [Cu-Zn] OS=Mus musculus OX=10090 GN=Sod1 PE=1 SV=2	100	18	1938	18	122.089	4594.54	18	15.9	2.98922e+09	4.6871e+09	5.52767e+09	5.52767e+09	4.03005e+09	4.61997e+09	3.1195e+09	4.44848e+09	5.02298e+09	4.06303e+09	3.50796e+09	6.22705e+09	5.12667e+09	17	17	16	17	17	18	17	17	17	17	17	18	17	17	16	17	17	18	17	17	17	17	17	18
P20029	14828	Hspa5	FALSE	Endoplasmic reticulum chaperone BiP OS=Mus musculus OX=10090 GN=Hspa5 PE=1 SV=3	72	48	1723	46	296.356	4425.65	48	72.4	1.69613e+09	2.34998e+09	1.11748e+09	1.11748e+09	1.31575e+09	1.85577e+09	1.45844e+09	9.07174e+08	1.00017e+09	2.76227e+09	1.70958e+09	5.28656e+08	1.48949e+09	47	47	46	48	48	48	46	45	48	48	44	48	45	45	44	46	46	46	44	43	46	46	42	46
P38647	15526	Hspa9	TRUE	Stress-70 protein, mitochondrial OS=Mus musculus OX=10090 GN=Hspa9 PE=1 SV=3	74	49	1630	49	353.745	4500.35	49	73.4	8.65606e+08	1.26912e+09	4.98672e+08	4.98672e+08	7.61218e+08	1.26253e+09	9.37032e+08	5.10606e+08	5.4048e+08	2.42493e+09	1.16281e+09	4.27574e+08	8.39743e+08	46	45	46	48	46	47	44	46	48	47	45	47	46	45	46	48	46	47	44	46	48	47	45	47
P27773	14827	Pdia3	FALSE	Protein disulfide-isomerase A3 OS=Mus musculus OX=10090 GN=Pdia3 PE=1 SV=2	71	48	1513	48	276.807	4095.48	48	56.6	2.95498e+09	3.91339e+09	4.42724e+09	4.42724e+09	2.50662e+09	2.85091e+09	2.28533e+09	3.13059e+09	3.71582e+09	3.78511e+09	3.08017e+09	3.34652e+09	3.40586e+09	47	48	48	47	45	47	46	47	46	48	46	47	47	48	48	47	45	47	46	47	46	48	46	47
Q64433	15528	Hspe1	TRUE	10 kDa heat shock protein, mitochondrial OS=Mus musculus OX=10090 GN=Hspe1 PE=1 SV=2	95	23	1409	23	106.652	3367.51	23	11	2.36159e+09	3.72081e+09	3.8317e+09	3.8317e+09	2.67526e+09	3.90362e+09	2.59957e+09	4.0173e+09	3.89172e+09	4.77406e+09	3.79459e+09	5.33166e+09	3.61295e+09	21	22	21	21	22	20	22	21	22	22	22	22	21	22	21	21	22	20	22	21	22	22	22	22
F6ZDS4	108989	Tpr	FALSE	Nucleoprotein TPR OS=Mus musculus OX=10090 GN=Tpr PE=1 SV=1	52	116	1324	116	544.5	3685.41	116	273.8	1.44055e+08	1.85411e+08	2.41037e+08	2.41037e+08	1.39831e+08	1.92006e+08	1.17599e+08	1.62852e+08	1.58949e+08	1.68652e+08	1.45201e+08	1.96132e+08	1.81718e+08	111	104	112	106	103	104	107	111	105	104	112	108	111	104	112	106	103	104	107	111	105	104	112	108
P52760	15473	Rida	TRUE	2-iminobutanoate/2-iminopropanoate deaminase OS=Mus musculus OX=10090 GN=Rida PE=1 SV=3	100	18	1281	18	113.755	4148.42	18	14.2	1.89105e+09	2.64361e+09	2.16907e+09	2.16907e+09	3.05847e+09	3.37542e+09	3.27585e+09	1.86579e+09	2.12442e+09	3.11155e+09	3.53076e+09	2.51145e+09	4.32485e+09	18	18	14	17	18	18	18	15	14	18	18	18	18	18	14	17	18	18	18	15	14	18	18	18
Q8BL66	216238	Eea1	FALSE	Early endosome antigen 1 OS=Mus musculus OX=10090 GN=Eea1 PE=1 SV=2	64	95	1277	95	415.028	3653.77	95	160.8	2.15888e+08	3.11104e+08	5.14996e+08	5.14996e+08	2.87846e+08	2.99563e+08	2.10898e+08	3.71561e+08	3.68025e+08	2.83072e+08	2.56874e+08	4.89454e+08	3.34172e+08	92	91	94	90	90	89	91	93	93	89	93	92	92	91	94	90	90	89	91	93	93	89	93	92
P08032	20739	Spta1	FALSE	Spectrin alpha chain, erythrocytic 1 OS=Mus musculus OX=10090 GN=Spta1 PE=1 SV=3	62	123	1201	122	590.86	3467.06	123	279.7	6.08144e+07	1.13087e+08	2.35399e+08	2.35399e+08	1.05668e+08	1.61606e+08	1.01997e+08	9.21737e+07	9.00619e+07	1.32298e+08	1.03344e+08	7.85426e+07	1.02763e+08	109	109	117	114	112	113	110	113	113	110	110	116	108	108	116	113	111	112	109	112	112	109	109	115
P0DP27	12313	Calm1	FALSE	Calmodulin-2 OS=Mus musculus OX=10090 GN=Calm2 PE=1 SV=1	100	18	1142	18	163.565	3303.98	18	16.8	1.29629e+09	2.35679e+09	2.55203e+09	2.55203e+09	1.67396e+09	1.86255e+09	1.25331e+09	2.21006e+09	2.34212e+09	1.67426e+09	1.30786e+09	2.25136e+09	2.00684e+09	18	18	18	18	18	17	18	18	17	18	18	17	18	18	18	18	18	17	18	18	17	18	18	17
P26039	21894	Tln1	FALSE	Talin-1 OS=Mus musculus OX=10090 GN=Tln1 PE=1 SV=2	53	93	1085	84	496.381	3406.66	93	269.7	1.09017e+08	1.98191e+08	7.58755e+07	7.58755e+07	1.38239e+08	2.29787e+08	1.43368e+08	6.78748e+07	9.40913e+07	1.59792e+08	1.51597e+08	7.06022e+07	1.63948e+08	85	90	74	86	88	88	80	85	84	87	76	88	77	81	67	77	79	80	71	76	75	79	68	80
Q8BI84	338366	Mia3	FALSE	Transport and Golgi organization protein 1 homolog OS=Mus musculus OX=10090 GN=Mia3 PE=1 SV=2	47	86	1072	86	436.171	2950.45	86	213.5	1.31659e+08	2.30526e+08	2.2193e+08	2.2193e+08	1.48577e+08	1.69271e+08	1.2788e+08	1.80221e+08	1.87226e+08	1.86232e+08	1.34354e+08	1.8884e+08	1.7392e+08	83	83	81	81	76	79	81	83	81	79	81	82	83	83	81	81	76	79	81	83	81	79	81	82
Q64727	22330	Vcl	FALSE	Vinculin OS=Mus musculus OX=10090 GN=Vcl PE=1 SV=4	71	67	1042	67	407.47	2889.89	67	116.6	1.97427e+08	3.22719e+08	1.46841e+08	1.46841e+08	2.03059e+08	3.24093e+08	2.71567e+08	1.10883e+08	1.24949e+08	4.49688e+08	2.92072e+08	9.47692e+07	2.26342e+08	62	66	59	64	64	64	60	61	65	64	57	63	62	66	59	64	64	64	60	61	65	64	57	63
P11588	100039054	Mup12	FALSE	Major urinary protein 1 OS=Mus musculus OX=10090 GN=Mup1 PE=1 SV=1	79	20	1038	1	161.522	3002.48	20	20.6	4.47245e+08	5.30285e+08	9.3004e+07	9.3004e+07	1.68169e+07	5.12373e+06	1.14118e+06	2.87669e+08	1.12175e+08	2.57061e+08	3.65498e+07	1.83403e+06	1.15822e+06	20	19	17	17	16	15	19	18	18	17	13	16	1	1	1	0	0	0	1	1	1	0	0	0
B5X0G2	100039206	Mup17	FALSE	Major urinary protein 17 OS=Mus musculus OX=10090 GN=Mup17 PE=2 SV=2	82	20	990	5	166.831	2842.29	20	20.6	1.84979e+08	3.34964e+08	6.18304e+07	6.18304e+07	3.92935e+07	3.07102e+07	1.20409e+07	1.25821e+08	9.75342e+07	2.64283e+08	6.67957e+07	8.73639e+06	1.46328e+07	20	19	15	15	14	14	18	17	18	16	13	14	5	5	3	2	2	2	4	4	5	3	3	2
Q00623	11806	Apoa1	FALSE	Apolipoprotein A-I OS=Mus musculus OX=10090 GN=Apoa1 PE=1 SV=2	81	32	976	32	184.577	2359.11	32	30.6	3.55072e+09	5.46692e+09	6.2872e+09	6.2872e+09	3.04865e+09	6.14684e+09	2.70315e+09	4.08557e+09	4.76741e+09	3.85353e+09	3.45702e+09	4.40492e+09	3.71659e+09	32	30	31	32	32	30	32	32	30	32	32	32	32	30	31	32	32	30	32	32	30	32	32	32
P59242	70737	Cgn	FALSE	Cingulin OS=Mus musculus OX=10090 GN=Cgn PE=1 SV=1	54	70	939	70	349.449	2539.17	70	136.4	1.36533e+08	2.17919e+08	2.72664e+08	2.72664e+08	1.67801e+08	2.25955e+08	1.51097e+08	2.13601e+08	2.13497e+08	2.08199e+08	1.71797e+08	2.74198e+08	2.21021e+08	67	67	69	67	69	69	68	66	66	67	69	68	67	67	69	67	69	69	68	66	66	67	69	68
Q9D3D9	66043	Atp5d	TRUE	ATP synthase subunit delta, mitochondrial OS=Mus musculus OX=10090 GN=Atp5f1d PE=1 SV=1	63	6	932	6	47.93	3263.38	6	17.6	5.19622e+08	7.97429e+08	7.3017e+08	7.3017e+08	5.36734e+08	6.2564e+08	4.88851e+08	6.72516e+08	7.88129e+08	1.05158e+09	6.74036e+08	9.16277e+08	7.61569e+08	6	6	6	5	5	5	5	5	6	6	6	6	6	6	6	5	5	5	5	5	6	6	6	6
P07724	11657	Alb	FALSE	Albumin OS=Mus musculus OX=10090 GN=Alb PE=1 SV=3	82	51	909	51	294.64	2550.1	51	68.6	1.14372e+09	1.76938e+09	4.50486e+08	4.50486e+08	1.63508e+09	4.73138e+09	4.23232e+09	3.68664e+08	4.20974e+08	6.74158e+09	3.03784e+09	3.82773e+08	8.92426e+08	44	44	30	45	47	48	34	38	51	50	37	40	44	44	30	45	47	48	34	38	51	50	37	40
Q91ZV0	338320	Mia2	FALSE	Melanoma inhibitory activity protein 2 OS=Mus musculus OX=10090 GN=Mia2 PE=1 SV=3	55	66	889	66	333.569	2461.58	66	156.4	1.65793e+08	2.37376e+08	2.49228e+08	2.49228e+08	1.5e+08	1.48236e+08	1.22052e+08	1.89318e+08	2.08409e+08	2.18541e+08	1.52927e+08	2.13973e+08	2.01189e+08	64	65	59	61	57	60	66	65	63	61	65	64	64	65	59	61	57	60	66	65	63	61	65	64
P11589	17841	Mup2	FALSE	Major urinary protein 2 OS=Mus musculus OX=10090 GN=Mup2 PE=1 SV=1	81	21	879	2	159.668	2591.03	21	20.7	3.17026e+09	5.18319e+09	1.12798e+09	1.12798e+09	5.36394e+08	4.20564e+08	2.07159e+08	1.69947e+09	1.10145e+09	2.39399e+09	9.22212e+08	1.21819e+08	1.98772e+08	21	20	18	17	16	15	19	19	19	18	13	16	2	2	2	1	1	1	2	2	2	2	1	1
Q60864	20867	Stip1	FALSE	Stress-induced-phosphoprotein 1 OS=Mus musculus OX=10090 GN=Stip1 PE=1 SV=1	72	50	878	50	287.378	2233.76	50	62.5	3.53342e+08	555579371	4.74116e+08	4.74116e+08	3.95454e+08	5.19902e+08	3.96172e+08	3.51211e+08	3.79484e+08	5.84583e+08	5.12147e+08	3.90689e+08	5.02186e+08	46	45	46	48	47	48	47	48	48	48	47	46	46	45	46	48	47	48	47	48	48	48	47	46
P58871	228140	Tnks1bp1	FALSE	182 kDa tankyrase-1-binding protein OS=Mus musculus OX=10090 GN=Tnks1bp1 PE=1 SV=2	52	65	866	65	363.308	2553.76	65	181.7	7.63106e+07	1.15278e+08	1.45106e+08	1.45106e+08	1.04257e+08	1.06227e+08	8.31253e+07	1.24758e+08	1.32185e+08	9.71793e+07	9.61335e+07	1.778e+08	1.45879e+08	58	56	57	62	56	58	59	62	53	59	61	60	58	56	57	62	56	58	59	62	53	59	61	60
P14211	12317	Calr	FALSE	Calreticulin OS=Mus musculus OX=10090 GN=Calr PE=1 SV=1	76	29	842	29	158.659	2224.7	29	48	3.7964e+08	4.34299e+08	2.08303e+08	2.08303e+08	2.85873e+08	3.86891e+08	2.87426e+08	2.23426e+08	2.48788e+08	5.92188e+08	4.16416e+08	1.54708e+08	2.97699e+08	29	28	28	28	28	29	25	28	29	29	26	28	29	28	28	28	28	29	25	28	29	29	26	28
P27546	17758	Map4	FALSE	Microtubule-associated protein 4 OS=Mus musculus OX=10090 GN=Map4 PE=1 SV=3	65	49	807	49	309.778	2402.3	49	117.4	7.36233e+07	1.16299e+08	1.89635e+08	1.89635e+08	118568188	1.10095e+08	6.69955e+07	141971883	1.59934e+08	1.00786e+08	8.83264e+07	1.97182e+08	1.44462e+08	45	45	48	46	45	44	47	48	47	45	47	46	45	45	48	46	45	44	47	48	47	45	47	46
Q3UMF0	319876	Cobll1	FALSE	Cordon-bleu protein-like 1 OS=Mus musculus OX=10090 GN=Cobll1 PE=1 SV=2	50	48	793	48	303.243	2028.84	48	137.3	9.31217e+07	1.65005e+08	1.5238e+08	1.5238e+08	1.18885e+08	1.68933e+08	9.03677e+07	1.4353e+08	1.51133e+08	9.18856e+07	1.12642e+08	1.82988e+08	1.32475e+08	43	45	44	45	44	44	45	44	44	45	46	44	43	45	44	45	44	44	45	44	44	45	46	44
P06728	11808	Apoa4	FALSE	Apolipoprotein A-IV OS=Mus musculus OX=10090 GN=Apoa4 PE=1 SV=3	78	32	785	32	212.641	2242.56	32	45	6.10817e+08	1.20918e+09	1.98087e+09	1.98087e+09	1.17136e+09	1.35787e+09	6.86196e+08	8.89906e+08	9.85969e+08	6.77735e+08	1.16821e+09	1.05516e+09	8.13588e+08	32	30	32	32	31	31	31	32	30	30	32	31	32	30	32	32	31	31	31	32	30	30	32	31
Q8VDD5	17886	Myh9	FALSE	Myosin-9 OS=Mus musculus OX=10090 GN=Myh9 PE=1 SV=4	33	68	770	62	371.13	2326.61	68	226.2	6.87974e+07	1.24099e+08	1.42392e+08	1.42392e+08	1.1151e+08	1.54394e+08	1.12899e+08	1.41279e+08	1.41357e+08	9.84802e+07	1.12763e+08	1.86603e+08	1.6963e+08	58	59	60	63	61	64	62	62	55	61	66	67	53	55	54	58	56	58	57	57	52	56	60	61
P20152	22352	Vim	FALSE	Vimentin OS=Mus musculus OX=10090 GN=Vim PE=1 SV=3	80	40	766	34	232.985	2084.27	40	53.7	2.91608e+08	4.5858e+08	3.5541e+08	3.5541e+08	3.02539e+08	5.11456e+08	4.76552e+08	3.11299e+08	4.06582e+08	6.14959e+08	5.48862e+08	2.90284e+08	5.81074e+08	40	40	38	40	40	40	39	40	40	40	40	40	34	34	32	34	34	34	33	34	34	34	34	34
Q9JL35	50887	Hmgn5	FALSE	High mobility group nucleosome-binding domain-containing protein 5 OS=Mus musculus OX=10090 GN=Hmgn5 PE=1 SV=2	77	49	738	49	357.791	2295.36	49	45.3	1.07072e+08	1.34411e+08	2.45196e+08	2.45196e+08	1.48974e+08	1.43243e+08	9.6946e+07	1.76161e+08	1.99037e+08	1.25391e+08	1.39613e+08	2.4353e+08	1.775e+08	46	45	46	47	45	42	45	46	42	47	45	45	46	45	46	47	45	42	45	46	42	47	45	45
Q9CY58	66870	Serbp1	FALSE	Plasminogen activator inhibitor 1 RNA-binding protein OS=Mus musculus OX=10090 GN=Serbp1 PE=1 SV=2	60	33	733	33	202.081	2248.41	33	44.7	2.68145e+08	4.97951e+08	4.61386e+08	4.61386e+08	2.92324e+08	3.50427e+08	2.29144e+08	4.26932e+08	4.71489e+08	4.201e+08	3.63267e+08	4.37446e+08	3.87114e+08	32	32	31	30	31	29	32	31	30	32	33	31	32	32	31	30	31	29	32	31	30	32	33	31
Q3U0V1	16549	Khsrp	FALSE	Far upstream element-binding protein 2 OS=Mus musculus OX=10090 GN=Khsrp PE=1 SV=2	62	41	719	38	204.737	2012.29	41	76.7	496078331	9.36522e+08	9.75232e+08	9.75232e+08	5.83979e+08	7.34554e+08	4.60748e+08	7.57193e+08	8.29914e+08	6.76729e+08	5.75307e+08	7.69597e+08	7.57959e+08	38	38	38	39	39	38	37	38	38	39	38	39	35	35	35	36	36	35	34	35	35	36	35	36
O88844	15926	Idh1	FALSE	Isocitrate dehydrogenase [NADP] cytoplasmic OS=Mus musculus OX=10090 GN=Idh1 PE=1 SV=2	79	32	708	31	219.994	1855.46	32	46.6	3.90795e+08	5.77851e+08	1.73857e+08	1.73857e+08	3.89511e+08	6.50073e+08	6.54488e+08	1.61241e+08	1.57581e+08	9.76465e+08	6.54096e+08	1.36392e+08	3.91038e+08	31	29	28	31	32	32	28	29	32	32	28	31	30	28	27	30	31	31	27	28	31	31	27	30
Q922J3	56430	Clip1	FALSE	CAP-Gly domain-containing linker protein 1 OS=Mus musculus OX=10090 GN=Clip1 PE=1 SV=1	54	71	695	66	318.125	1958.16	71	155.7	6.63802e+07	9.58346e+07	1.35075e+08	1.35075e+08	8.70292e+07	1.08252e+08	7.05375e+07	8.84862e+07	1.01182e+08	8.48301e+07	8.80452e+07	1.31112e+08	1.02199e+08	65	65	67	68	67	65	65	67	62	66	70	68	60	60	62	63	62	60	60	62	57	61	65	63
Q6PGL7	28006	Washc2	FALSE	WASH complex subunit 2 OS=Mus musculus OX=10090 GN=Washc2 PE=1 SV=1	71	56	692	56	323.431	2156.55	56	145.2	6.05195e+07	9.79821e+07	1.3535e+08	1.3535e+08	7.37347e+07	8.34352e+07	5.62975e+07	1.0174e+08	1.12011e+08	8.13265e+07	7.65502e+07	1.3351e+08	9.6774e+07	49	51	55	52	49	48	51	55	48	49	53	53	49	51	55	52	49	48	51	55	48	49	53	53
P32020	20280	Scp2	TRUE	Sterol carrier protein 2 OS=Mus musculus OX=10090 GN=Scp2 PE=1 SV=3	27	24	689	24	164.062	2048.58	24	59.1	1.42057e+09	2.68788e+09	1.88174e+09	1.88174e+09	1.63673e+09	2.11644e+09	1.38941e+09	1.46183e+09	1.67687e+09	2.42374e+09	1.85334e+09	1.36016e+09	1.79539e+09	23	22	21	21	21	20	19	19	22	20	19	23	23	22	21	21	21	20	19	19	22	20	19	23
Q3TLH4	226562	Prrc2c	FALSE	Protein PRRC2C OS=Mus musculus OX=10090 GN=Prrc2c PE=1 SV=3	31	72	689	68	331.923	1866.89	72	310.7	5.58583e+07	8.29632e+07	9.60144e+07	9.60144e+07	6.56095e+07	7.42961e+07	4.50314e+07	7.40077e+07	8.35121e+07	7.94405e+07	5.66952e+07	8.39024e+07	8.4486e+07	66	65	68	67	67	65	67	67	65	63	68	68	62	61	65	63	64	62	63	63	61	59	64	64
Q02819	18220	Nucb1	FALSE	Nucleobindin-1 OS=Mus musculus OX=10090 GN=Nucb1 PE=1 SV=2	75	38	671	38	204.251	1728.42	38	53.4	2.54795e+08	3.59113e+08	4.706e+08	4.706e+08	2.03553e+08	1.33864e+08	1.25661e+08	3.5751e+08	3.9162e+08	3.23507e+08	2.40182e+08	4.33639e+08	3.0367e+08	38	38	38	37	34	37	36	37	38	36	38	38	38	38	38	37	34	37	36	37	38	36	38	38
Q99MI1	111173	Erc1	FALSE	ELKS/Rab6-interacting/CAST family member 1 OS=Mus musculus OX=10090 GN=Erc1 PE=1 SV=1	51	56	671	50	250.921	1793.77	56	128.3	5.7456e+07	9.08382e+07	9.32077e+07	9.32077e+07	5.28226e+07	7.14382e+07	4.64508e+07	6.48127e+07	7.05425e+07	8.0737e+07	5.99435e+07	6.1452e+07	7.17506e+07	51	52	50	51	50	51	49	54	52	51	51	51	45	46	44	45	44	45	43	48	46	45	45	45
Q8BGD9	75705	Eif4b	FALSE	Eukaryotic translation initiation factor 4B OS=Mus musculus OX=10090 GN=Eif4b PE=1 SV=1	51	35	670	35	169.577	1670.63	35	68.8	1.61296e+08	2.59422e+08	3.20105e+08	3.20105e+08	1.94484e+08	2.03091e+08	1.51411e+08	2.22757e+08	2.65952e+08	2.00716e+08	1.86808e+08	2.81902e+08	2.52775e+08	34	34	34	34	34	34	34	34	33	33	34	34	34	34	34	34	34	34	34	34	33	33	34	34
P35564	12330	Canx	FALSE	Calnexin OS=Mus musculus OX=10090 GN=Canx PE=1 SV=1	57	39	667	39	254.83	1925.96	39	67.2	4.01583e+08	5.20276e+08	3.85961e+08	3.85961e+08	3.49995e+08	4.65293e+08	3.51903e+08	3.7208e+08	3.93421e+08	5.97715e+08	5.05298e+08	3.59815e+08	5.15347e+08	38	35	36	36	36	36	35	37	36	37	36	37	38	35	36	36	36	36	35	37	36	37	36	37
P31786	13167	Dbi	TRUE	Acyl-CoA-binding protein OS=Mus musculus OX=10090 GN=Dbi PE=1 SV=2	89	12	660	12	86.646	2042.45	12	10	1.37552e+09	2.85047e+09	2.49265e+09	2.49265e+09	1.737e+09	2.39917e+09	1.59793e+09	2.15494e+09	2.53695e+09	2.36963e+09	2.29879e+09	3.55979e+09	2.28851e+09	12	12	12	12	12	12	12	12	12	12	12	11	12	12	12	12	12	12	12	12	12	12	12	11
Q9D0E1	76936	Hnrnpm	FALSE	Heterogeneous nuclear ribonucleoprotein M OS=Mus musculus OX=10090 GN=Hnrnpm PE=1 SV=3	48	31	654	30	200.12	1452.28	31	77.6	8.96784e+07	2.11003e+08	1.10673e+08	1.10673e+08	7.69381e+07	1.43359e+08	7.80525e+07	1.22459e+08	1.21401e+08	1.06471e+08	6.86324e+07	1.18331e+08	1.13116e+08	29	30	29	29	29	31	31	30	29	28	31	31	28	29	28	28	28	30	30	29	28	27	30	30
Q80WJ7	67154	Mtdh	FALSE	Protein LYRIC OS=Mus musculus OX=10090 GN=Mtdh PE=1 SV=1	61	36	640	36	215.557	1857.28	36	63.8	1.55157e+08	2.16241e+08	2.58607e+08	2.58607e+08	1.67379e+08	1.95667e+08	1.40297e+08	2.31013e+08	2.43951e+08	1.9649e+08	2.11164e+08	3.08818e+08	2.45896e+08	33	33	34	33	34	33	34	35	34	33	34	34	33	33	34	33	34	33	34	35	34	33	34	34
P63017	15481	Hspa8	FALSE	Heat shock cognate 71 kDa protein OS=Mus musculus OX=10090 GN=Hspa8 PE=1 SV=1	70	37	628	32	232.17	1792.63	37	70.8	1.55335e+08	2.06958e+08	8.52808e+07	8.52808e+07	1.7632e+08	3.25252e+08	2.83368e+08	5.80239e+07	6.66632e+07	3.82428e+08	2.49841e+08	4.96219e+07	1.27592e+08	37	36	33	36	37	37	32	33	37	36	31	35	32	31	28	31	32	32	27	28	32	31	26	30
P08113	22027	Hsp90b1	FALSE	Endoplasmin OS=Mus musculus OX=10090 GN=Hsp90b1 PE=1 SV=2	58	42	624	41	222.479	1690.06	42	92.4	2.57183e+08	3.14589e+08	1.28788e+08	1.28788e+08	2.34516e+08	3.3903e+08	3.17666e+08	1.10728e+08	1.17344e+08	4.51277e+08	3.21693e+08	9.62694e+07	2.16188e+08	40	37	34	41	38	41	33	36	40	41	33	38	39	36	33	40	37	40	32	35	39	40	32	37
P08226	11816	Apoe	FALSE	Apolipoprotein E OS=Mus musculus OX=10090 GN=Apoe PE=1 SV=2	67	23	623	23	161.428	1550.79	23	35.8	1.11794e+09	1.53747e+09	1.72607e+09	1.72607e+09	8.44658e+08	9.1348e+08	7.98986e+08	1.39264e+09	1.57259e+09	1.46024e+09	1.03073e+09	1.64498e+09	1.23228e+09	22	22	22	22	22	22	22	22	22	22	22	23	22	22	22	22	22	22	22	22	22	22	22	23
P09405	17975	Ncl	FALSE	Nucleolin OS=Mus musculus OX=10090 GN=Ncl PE=1 SV=2	48	35	621	35	148.988	1660.52	35	76.7	3.56179e+08	5.82706e+08	4.7969e+08	4.7969e+08	2.80218e+08	4.43928e+08	2.95895e+08	3.60283e+08	3.82434e+08	5.05844e+08	3.59439e+08	3.54344e+08	3.48284e+08	34	32	33	31	33	32	31	34	33	33	33	33	34	32	33	31	33	32	31	34	33	33	33	33
P26231	12385	Ctnna1	FALSE	Catenin alpha-1 OS=Mus musculus OX=10090 GN=Ctnna1 PE=1 SV=1	66	43	620	35	262.222	1876.61	43	100	1.04916e+08	1.47659e+08	8.59142e+07	8.59142e+07	1.16079e+08	200346740	1.44501e+08	5.97782e+07	6.80433e+07	2.30098e+08	1.49157e+08	4.57503e+07	1.12343e+08	41	42	39	42	40	41	39	41	43	41	38	40	34	34	32	35	33	34	32	33	35	33	31	33
Q64478	319182	H2bc9	FALSE	Histone H2B type 1-H OS=Mus musculus OX=10090 GN=H2bc9 PE=1 SV=3	71	13	607	13	62.913	1485.26	13	13.9	2.31587e+08	5.51035e+08	2.3448e+08	2.3448e+08	3.41446e+08	5.89092e+08	4.17976e+08	4.66785e+08	3.23295e+08	6.87096e+08	5.46148e+08	3.48566e+08	5.43964e+08	13	13	12	13	13	13	13	13	13	13	13	13	13	13	12	13	13	13	13	13	13	13	13	13
P62984	22186	Uba52	FALSE	Ubiquitin-60S ribosomal protein L40 OS=Mus musculus OX=10090 GN=Uba52 PE=1 SV=2	66	13	596	13	79.338	1526.22	13	14.7	1.3128e+09	2.37464e+09	1.90398e+09	1.90398e+09	1.28494e+09	1.68282e+09	1.25653e+09	1.64886e+09	1.68613e+09	1.56511e+09	1.31355e+09	1.88676e+09	1.63195e+09	13	12	12	12	13	13	13	13	13	13	12	13	13	12	12	12	13	13	13	13	13	13	12	13
O35381	11737	Anp32a	FALSE	Acidic leucine-rich nuclear phosphoprotein 32 family member A OS=Mus musculus OX=10090 GN=Anp32a PE=1 SV=1	51	16	591	12	71.483	1517.3	16	28.5	4.18371e+08	7.95441e+08	9.03576e+08	9.03576e+08	5.11587e+08	6.8162e+08	4.47579e+08	6.01711e+08	6.76909e+08	6.18945e+08	6.49368e+08	7.92945e+08	6.8224e+08	16	16	16	16	16	16	16	16	16	16	16	16	12	12	12	12	12	12	12	12	12	12	12	12
P56395	109672	Cyb5a	FALSE	Cytochrome b5 OS=Mus musculus OX=10090 GN=Cyb5a PE=1 SV=2	68	13	586	13	79.924	1623.72	13	15.2	1.59443e+09	2.54573e+09	2.35468e+09	2.35468e+09	2.10323e+09	2.41609e+09	2.10774e+09	1.89208e+09	1.7217e+09	2.59748e+09	2.41884e+09	2.37205e+09	2.58155e+09	13	12	13	12	12	12	13	11	13	13	12	13	13	12	13	12	12	12	13	11	13	13	12	13
E9Q7G0	101706	Numa1	FALSE	Nuclear mitotic apparatus protein 1 OS=Mus musculus OX=10090 GN=Numa1 PE=1 SV=1	41	68	584	68	295.76	1698.95	68	235.5	3.37139e+07	7.8486e+07	3.90823e+07	3.90823e+07	3.52184e+07	5.39512e+07	3.332e+07	5.13899e+07	5.13011e+07	3.46785e+07	3.83669e+07	7.31788e+07	5.51654e+07	59	59	55	62	59	61	61	64	52	56	66	63	59	59	55	62	59	61	61	64	52	56	66	63
P61979	15387	Hnrnpk	FALSE	Heterogeneous nuclear ribonucleoprotein K OS=Mus musculus OX=10090 GN=Hnrnpk PE=1 SV=1	62	25	584	25	155.394	1582.69	25	50.9	3.09962e+08	7.20766e+08	3.29179e+08	3.29179e+08	3.27077e+08	5.59224e+08	3.78193e+08	3.68725e+08	3.59631e+08	4.9193e+08	4.12624e+08	4.28369e+08	3.93458e+08	24	25	22	23	23	23	24	23	23	24	24	24	24	25	22	23	23	23	24	23	23	24	24	24
O35658	12261	C1qbp	TRUE	Complement component 1 Q subcomponent-binding protein, mitochondrial OS=Mus musculus OX=10090 GN=C1qbp PE=1 SV=1	55	10	578	10	72.904	1741.77	10	31	2.19923e+08	2.81469e+08	3.57305e+08	3.57305e+08	1.38379e+08	1.89877e+08	1.25239e+08	3.82835e+08	3.54319e+08	4.45929e+08	2.01318e+08	4.94689e+08	2.52284e+08	9	9	10	9	9	9	10	10	10	10	10	10	9	9	10	9	9	9	10	10	10	10	10	10
P68372	227613	Tubb4b	FALSE	Tubulin beta-4B chain OS=Mus musculus OX=10090 GN=Tubb4b PE=1 SV=1	73	24	578	1	170.332	1584.3	24	49.8	2.52639e+08	3.22376e+08	1.3325e+08	1.3325e+08	2.62122e+08	5.7745e+08	3.50935e+08	1.28072e+08	1.66676e+08	5.48051e+08	4.69463e+08	1.28127e+08	2.53971e+08	22	22	21	22	23	22	21	22	24	22	21	22	1	1	1	1	1	1	1	1	1	1	1	1
Q6NZJ6	208643	Eif4g1	FALSE	Eukaryotic translation initiation factor 4 gamma 1 OS=Mus musculus OX=10090 GN=Eif4g1 PE=1 SV=1	32	42	572	38	240.073	1539.84	42	176	8.23784e+07	1.61256e+08	1.14164e+08	1.14164e+08	8.55411e+07	1.14179e+08	7.37973e+07	1.25859e+08	1.23345e+08	8.82466e+07	8.169e+07	1.40928e+08	9.53716e+07	41	41	39	40	40	41	42	42	37	40	43	39	36	36	34	35	35	36	37	37	32	35	38	34
P99027	67186	Rplp2	FALSE	60S acidic ribosomal protein P2 OS=Mus musculus OX=10090 GN=Rplp2 PE=1 SV=3	97	14	569	14	101.341	1898.99	14	11.6	1.05134e+09	1.90054e+09	1.9899e+09	1.9899e+09	1.13094e+09	1.45041e+09	9.70246e+08	1.65794e+09	1.78318e+09	1.54701e+09	1.16919e+09	1.6124e+09	1.51143e+09	14	13	14	14	13	13	14	14	13	14	14	14	14	13	14	14	13	13	14	14	13	14	14	14
P57780	60595	Actn4	FALSE	Alpha-actinin-4 OS=Mus musculus OX=10090 GN=Actn4 PE=1 SV=1	69	53	567	38	288.59	1650.01	53	104.9	1.12946e+08	1.59641e+08	1.03348e+08	1.03348e+08	1.24092e+08	2.6229e+08	2.08803e+08	6.8491e+07	8.70508e+07	3.71396e+08	1.98956e+08	7.28519e+07	1.03984e+08	48	47	39	48	51	50	41	42	53	50	41	46	35	34	28	34	36	36	29	30	38	36	30	33
Q91VW5	54214	Golga4	FALSE	Golgin subfamily A member 4 OS=Mus musculus OX=10090 GN=Golga4 PE=1 SV=2	40	77	565	77	316.405	1565.58	77	257.4	2.75739e+07	3.96431e+07	5.85718e+07	5.85718e+07	2.70574e+07	2.73599e+07	2.16921e+07	4.06458e+07	3.93902e+07	3.33856e+07	2.4022e+07	5.48272e+07	3.17529e+07	71	68	74	69	61	66	74	73	73	62	74	68	71	68	74	69	61	66	74	73	73	62	74	68
Q9JIX8	56215	Acin1	FALSE	Apoptotic chromatin condensation inducer in the nucleus OS=Mus musculus OX=10090 GN=Acin1 PE=1 SV=3	39	44	541	44	217.875	1446.69	44	150.6	8.69256e+07	1.49096e+08	1.86887e+08	1.86887e+08	9.62697e+07	1.36569e+08	8.4125e+07	1.39081e+08	1.4203e+08	1.25357e+08	1.09625e+08	1.65591e+08	1.36536e+08	37	41	43	40	41	41	41	42	42	40	40	41	37	41	43	40	41	41	41	42	42	40	40	41
Q61595	16709	Ktn1	FALSE	Kinectin OS=Mus musculus OX=10090 GN=Ktn1 PE=1 SV=1	49	58	537	58	255.096	1478.24	58	152.5	36499377	5.61396e+07	6.28467e+07	6.28467e+07	4.20547e+07	5.07093e+07	3.56773e+07	4.43843e+07	5.42533e+07	4.41272e+07	4.09534e+07	6.30054e+07	5.35483e+07	53	52	54	54	53	54	51	53	49	53	56	53	53	52	54	54	53	54	51	53	49	53	56	53
Q9QYG0	29811	Ndrg2	FALSE	Protein NDRG2 OS=Mus musculus OX=10090 GN=Ndrg2 PE=1 SV=1	78	18	533	18	141.628	1647.33	18	40.8	6.90275e+08	8.92931e+08	8.01344e+08	8.01344e+08	5.84987e+08	6.0157e+08	5.30026e+08	5.90102e+08	7.28296e+08	9.17384e+08	7.94728e+08	5.83438e+08	8.54091e+08	18	16	17	16	17	15	16	18	16	18	16	18	18	16	17	16	17	15	16	18	16	18	16	18
Q8R317	56085	Ubqln1	FALSE	Ubiquilin-1 OS=Mus musculus OX=10090 GN=Ubqln1 PE=1 SV=1	53	18	531	14	202.594	1679.33	18	61.9	1.1252e+08	1.87915e+08	2.35318e+08	2.35318e+08	1.31012e+08	1.45633e+08	1.03155e+08	1.7085e+08	1.86202e+08	1.56818e+08	1.26788e+08	2.33745e+08	1.80306e+08	17	15	17	15	15	14	16	16	15	16	14	15	13	11	13	11	11	10	12	12	11	12	10	11
O55022	53328	Pgrmc1	FALSE	Membrane-associated progesterone receptor component 1 OS=Mus musculus OX=10090 GN=Pgrmc1 PE=1 SV=4	68	17	531	16	78.817	1719.38	17	21.7	6.72036e+08	1.21953e+09	1.13657e+09	1.13657e+09	6.917e+08	7.34654e+08	6.27925e+08	8.76157e+08	1.02716e+09	1.13725e+09	7.9142e+08	1.02676e+09	9.61517e+08	16	15	15	15	14	16	15	15	16	16	17	17	15	14	14	14	13	15	14	14	15	15	16	16
Q7TMM9	22151	Tubb2a	FALSE	Tubulin beta-2A chain OS=Mus musculus OX=10090 GN=Tubb2a PE=1 SV=1	82	24	527	6	167.987	1446.02	24	49.9	3.97816e+07	3.86853e+07	3.36579e+07	3.36579e+07	4.20406e+07	7.04261e+07	4.77772e+07	2.30409e+07	3.34318e+07	7.32844e+07	6.93537e+07	2.57238e+07	4.21633e+07	22	22	21	22	22	22	21	22	23	21	21	22	4	4	4	4	4	4	4	4	5	4	4	4
P46656	14148	Fdx1	TRUE	Adrenodoxin, mitochondrial OS=Mus musculus OX=10090 GN=Fdx1 PE=1 SV=1	41	9	523	9	52.719	1051.65	9	20.1	3.62708e+08	6.18435e+08	6.65919e+08	6.65919e+08	3.10305e+08	3.41606e+08	2.58547e+08	5.4178e+08	6.47367e+08	7.18682e+08	3.81632e+08	6.44558e+08	3.68683e+08	9	9	9	9	9	9	9	9	9	9	9	9	9	9	9	9	9	9	9	9	9	9	9	9
Q9DBG5	66905	Plin3	FALSE	Perilipin-3 OS=Mus musculus OX=10090 GN=Plin3 PE=1 SV=1	82	23	514	23	212.086	1684.87	23	47.2	1.10577e+08	1.67233e+08	2.14443e+08	2.14443e+08	1.30324e+08	1.55066e+08	1.24325e+08	1.70084e+08	2.11178e+08	2.01955e+08	1.69443e+08	2.10363e+08	1.79461e+08	22	22	23	22	22	23	22	23	22	23	22	22	22	22	23	22	22	23	22	23	22	23	22	22
P17742	268373	Ppia	FALSE	Peptidyl-prolyl cis-trans isomerase A OS=Mus musculus OX=10090 GN=Ppia PE=1 SV=2	84	14	513	14	105.561	1322.15	14	18	1.0101e+09	1.55245e+09	8.02477e+08	8.02477e+08	1.00582e+09	1.47946e+09	1.26359e+09	7.41153e+08	8.211e+08	1.99672e+09	1.37113e+09	6.05376e+08	1.08052e+09	14	14	12	14	14	14	13	14	14	14	12	14	14	14	12	14	14	14	13	14	14	14	12	14
P99024	22154	Tubb5	FALSE	Tubulin beta-5 chain OS=Mus musculus OX=10090 GN=Tubb5 PE=1 SV=1	73	24	509	4	157.171	1408.13	24	49.6	2.8719e+07	5.08738e+07	2.34088e+07	2.34088e+07	3.13643e+07	4.9891e+07	3.9247e+07	2.61338e+07	3.51148e+07	5.52452e+07	4.59526e+07	2.90409e+07	3.47709e+07	22	22	21	22	23	22	21	22	24	22	21	22	4	4	4	4	4	4	4	4	4	4	4	4
P07758	20700	Serpina1a	FALSE	Alpha-1-antitrypsin 1-1 OS=Mus musculus OX=10090 GN=Serpina1a PE=1 SV=4	70	22	508	8	128.317	1649.72	22	46	3.52399e+08	3.99126e+08	3.06668e+08	3.06668e+08	1.41397e+08	1.86452e+08	1.31537e+08	2.57939e+08	2.54897e+08	3.3482e+08	2.03224e+08	2.05554e+08	2.00816e+08	21	17	19	16	15	15	17	19	17	16	16	16	8	6	7	7	6	6	6	7	7	7	6	6
Q6PDM2	110809	Srsf1	FALSE	Serine/arginine-rich splicing factor 1 OS=Mus musculus OX=10090 GN=Srsf1 PE=1 SV=3	53	17	502	17	78.192	1238.37	17	27.7	1.54756e+08	2.73002e+08	2.48341e+08	2.48341e+08	1.40006e+08	2.08139e+08	1.43287e+08	1.85854e+08	2.2595e+08	2.23455e+08	1.93636e+08	1.86522e+08	1.65193e+08	17	17	17	17	17	16	17	17	17	17	17	17	17	17	17	17	17	16	17	17	17	17	17	17
Q7TSC1	53761	Prrc2a	FALSE	Protein PRRC2A OS=Mus musculus OX=10090 GN=Prrc2a PE=1 SV=1	32	48	502	44	221.425	1398.62	48	229.1	2.03887e+07	3.50208e+07	4.09074e+07	4.09074e+07	2.48545e+07	2.33272e+07	1.50551e+07	3.34272e+07	3.71919e+07	2.68889e+07	2.13281e+07	3.60181e+07	3.17187e+07	46	44	43	44	39	38	44	46	43	42	48	45	42	40	40	40	36	35	40	42	39	38	44	41
P48678	16905	Lmna	FALSE	Prelamin-A/C OS=Mus musculus OX=10090 GN=Lmna PE=1 SV=2	68	44	492	42	216.843	1361.21	44	74.2	6.80439e+07	1.07261e+08	3.75007e+07	3.75007e+07	7.44276e+07	1.39026e+08	1.35192e+08	4.19859e+07	3.46919e+07	1.51095e+08	1.18769e+08	3.80816e+07	8.57285e+07	39	41	36	42	42	44	38	37	42	42	39	42	37	39	34	40	40	42	36	35	40	40	37	40
P21107	59069	Tpm3	FALSE	Tropomyosin alpha-3 chain OS=Mus musculus OX=10090 GN=Tpm3 PE=1 SV=3	58	24	492	9	136.629	1309.71	24	33	2.73369e+08	5.167e+08	5.40821e+08	5.40821e+08	3.5401e+08	3.59031e+08	2.79322e+08	4.81423e+08	5.31509e+08	4.17655e+08	3.81889e+08	6.55945e+08	4.69988e+08	23	22	22	23	23	23	22	23	23	23	23	23	9	9	9	9	9	9	9	9	9	9	9	9
O35887	12321	Calu	FALSE	Calumenin OS=Mus musculus OX=10090 GN=Calu PE=1 SV=1	72	24	490	24	166.692	1477.89	24	37	1.85442e+08	2.99217e+08	3.25666e+08	3.25666e+08	2.21975e+08	2.20631e+08	1.70502e+08	3.4438e+08	3.25132e+08	2.40887e+08	2.38741e+08	4.02863e+08	2.96201e+08	21	22	23	21	21	21	23	24	23	22	22	22	21	22	23	21	21	21	23	24	23	22	22	22
Q8VD04	54645	Gripap1	FALSE	GRIP1-associated protein 1 OS=Mus musculus OX=10090 GN=Gripap1 PE=1 SV=1	60	44	490	44	230.085	1406.44	44	92.7	5.22302e+07	7.56608e+07	7.48708e+07	7.48708e+07	4.95516e+07	6.52715e+07	4.79994e+07	5.92689e+07	6.67152e+07	6.34004e+07	5.89278e+07	7.54347e+07	6.54321e+07	41	42	42	42	42	41	40	42	41	41	43	43	41	42	42	42	42	41	40	42	41	41	43	43
Q91WJ8	51886	Fubp1	FALSE	Far upstream element-binding protein 1 OS=Mus musculus OX=10090 GN=Fubp1 PE=1 SV=1	48	26	488	23	155.385	1237.54	26	68.5	4.60852e+07	7.78837e+07	8.04585e+07	8.04585e+07	5.277e+07	7.47629e+07	4.39761e+07	5.94414e+07	6.45621e+07	6.7657e+07	6.837e+07	6.34833e+07	6.48318e+07	26	25	24	26	25	25	25	26	25	25	26	25	23	22	21	23	22	22	22	23	22	22	23	22
Q9DCX2	71679	Atp5h	TRUE	ATP synthase subunit d, mitochondrial OS=Mus musculus OX=10090 GN=Atp5pd PE=1 SV=3	93	16	486	16	116.701	1480.39	16	18.7	8.04022e+08	1.29846e+09	1.16188e+09	1.16188e+09	7.81591e+08	1.0414e+09	7.26143e+08	1.07335e+09	1.14408e+09	1.78922e+09	1.13664e+09	1.36949e+09	1.16504e+09	16	15	14	15	14	15	15	14	16	16	15	16	16	15	14	15	14	15	15	14	16	16	15	16
P51125	12380	Cast	FALSE	Calpastatin OS=Mus musculus OX=10090 GN=Cast PE=1 SV=2	65	37	479	37	238.729	1468.81	37	84.9	4.3755e+07	7.27883e+07	9.57535e+07	9.57535e+07	5.56606e+07	7.15329e+07	4.40884e+07	7.97216e+07	8.94379e+07	6.85823e+07	5.27321e+07	8.79994e+07	8.5274e+07	28	31	36	33	35	32	34	35	35	33	34	34	28	31	36	33	35	32	34	35	35	33	34	34
Q9D6F9	22153	Tubb4a	FALSE	Tubulin beta-4A chain OS=Mus musculus OX=10090 GN=Tubb4a PE=1 SV=3	62	20	478	1	139.359	1272.53	20	49.6	3.17455e+06	3.45601e+06	2.53192e+06	2.53192e+06	3.192e+06	6.36584e+06	3.71426e+06	1.10109e+06	2.18326e+06	7.38039e+06	5.08065e+06	774508	1.71624e+06	18	18	17	18	19	18	17	18	20	18	17	18	1	1	1	1	1	1	1	1	1	1	1	1
P97371	19186	Psme1	FALSE	Proteasome activator complex subunit 1 OS=Mus musculus OX=10090 GN=Psme1 PE=1 SV=2	76	23	473	23	131.994	1328.77	23	28.7	4.3005e+08	8.432e+08	7.23207e+08	7.23207e+08	5.39409e+08	6.80546e+08	4.7603e+08	4.93077e+08	7.74975e+08	7.48553e+08	6.25908e+08	6.9255e+08	8.48827e+08	20	21	21	21	21	21	21	22	22	21	22	22	20	21	21	21	21	21	21	22	22	21	22	22
P70441	26941	Slc9a3r1	FALSE	Na(+)/H(+) exchange regulatory cofactor NHE-RF1 OS=Mus musculus OX=10090 GN=Slc9a3r1 PE=1 SV=3	78	29	472	29	159.924	1433.5	29	38.6	4.1244e+08	6.31339e+08	6.75564e+08	6.75564e+08	3.75566e+08	4.36609e+08	2.95373e+08	5.41812e+08	6.17286e+08	4.8546e+08	3.99795e+08	5.81555e+08	4.9111e+08	27	27	27	27	27	27	27	27	26	27	28	27	27	27	27	27	27	27	27	27	26	27	28	27
O09012	19305	Pex5	FALSE	Peroxisomal targeting signal 1 receptor OS=Mus musculus OX=10090 GN=Pex5 PE=1 SV=2	73	30	466	30	192.389	1442.62	30	70.7	7.01976e+07	8.85392e+07	5.29049e+07	5.29049e+07	5.09176e+07	5.17952e+07	4.8657e+07	4.84993e+07	5.08765e+07	1.18083e+08	6.65928e+07	3.24919e+07	6.26403e+07	30	30	27	30	27	29	28	29	30	28	28	29	30	30	27	30	27	29	28	29	30	28	28	29
Q60598	13043	Cttn	FALSE	Src substrate cortactin OS=Mus musculus OX=10090 GN=Cttn PE=1 SV=2	55	28	463	28	108.77	1207.97	28	61.2	1.74464e+08	2.94269e+08	3.67977e+08	3.67977e+08	2.12644e+08	2.64234e+08	1.70127e+08	2.86469e+08	3.36688e+08	2.89517e+08	2.47907e+08	3.53917e+08	2.85209e+08	27	28	27	28	28	28	26	28	28	28	28	28	27	28	27	28	28	28	26	28	28	28	28	28
Q9WTP6	11637	Ak2	TRUE	Adenylate kinase 2, mitochondrial OS=Mus musculus OX=10090 GN=Ak2 PE=1 SV=5	75	17	463	17	113.639	1359.05	17	26.5	1.68929e+08	2.19122e+08	8.8007e+07	8.8007e+07	1.66851e+08	2.54556e+08	2.24872e+08	1.09469e+08	1.1819e+08	6.16606e+08	3.06309e+08	9.68371e+07	1.929e+08	17	17	15	17	17	17	17	16	17	17	17	17	17	17	15	17	17	17	17	16	17	17	17	17
P31001	13346	Des	FALSE	Desmin OS=Mus musculus OX=10090 GN=Des PE=1 SV=3	73	33	460	28	162.102	1304.77	33	53.5	3.87155e+07	6.08637e+07	4.34131e+07	4.34131e+07	4.08829e+07	7.36659e+07	6.80059e+07	3.16498e+07	3.5134e+07	7.60549e+07	8.26413e+07	3.17647e+07	6.97236e+07	30	31	30	31	32	32	29	32	33	33	31	32	25	26	25	26	27	27	24	27	28	28	26	27
P51859	15191	Hdgf	FALSE	Hepatoma-derived growth factor OS=Mus musculus OX=10090 GN=Hdgf PE=1 SV=2	88	26	459	25	131.515	1334.99	26	26.3	1.16961e+08	2.1104e+08	2.21582e+08	2.21582e+08	1.50949e+08	2.59701e+08	1.40757e+08	1.79743e+08	1.95095e+08	1.98121e+08	2.03502e+08	2.25658e+08	2.45345e+08	23	24	26	24	24	24	23	24	24	24	24	24	22	23	25	23	23	23	22	23	23	23	23	23
P24270	12359	Cat	TRUE	Catalase OS=Mus musculus OX=10090 GN=Cat PE=1 SV=4	68	29	456	29	161.964	1308.36	29	59.8	1.35495e+08	1.986e+08	1.32401e+08	1.32401e+08	1.57414e+08	2.74863e+08	1.94935e+08	1.06324e+08	9.57545e+07	2.62838e+08	2.20505e+08	9.95863e+07	1.44895e+08	27	26	25	27	29	28	26	27	28	29	26	27	27	26	25	27	29	28	26	27	28	29	26	27
Q921M4	99412	Golga2	FALSE	Golgin subfamily A member 2 OS=Mus musculus OX=10090 GN=Golga2 PE=1 SV=3	49	37	454	37	202.231	1324.04	37	113.2	3.18587e+07	4.03656e+07	4.57619e+07	4.57619e+07	2.89092e+07	3.45946e+07	2.41606e+07	3.4298e+07	3.52843e+07	4.40999e+07	3.19432e+07	3.53907e+07	3.72699e+07	37	35	35	36	33	34	36	36	35	33	37	37	37	35	35	36	33	34	36	36	35	33	37	37
P39447	21872	Tjp1	FALSE	Tight junction protein ZO-1 OS=Mus musculus OX=10090 GN=Tjp1 PE=1 SV=2	35	44	447	44	226.384	1240.26	44	194.6	4.98824e+07	1.13708e+08	8.81631e+07	8.81631e+07	8.05685e+07	1.32582e+08	8.43373e+07	7.44117e+07	7.73939e+07	8.32376e+07	1.03616e+08	9.66623e+07	9.38669e+07	35	37	34	38	40	38	38	36	32	38	42	38	35	37	34	38	40	38	38	36	32	38	42	38
Q99K28	77038	Arfgap2	FALSE	ADP-ribosylation factor GTPase-activating protein 2 OS=Mus musculus OX=10090 GN=Arfgap2 PE=1 SV=1	42	18	447	18	137.509	1269.84	18	56.6	1.03219e+08	2.01025e+08	1.72533e+08	1.72533e+08	1.04925e+08	1.27642e+08	9.18829e+07	1.74236e+08	1.71322e+08	1.27616e+08	1.13284e+08	1.93255e+08	1.48146e+08	18	18	18	18	18	18	18	18	18	18	18	18	18	18	18	18	18	18	18	18	18	18	18	18
Q569Z6	230753	Thrap3	FALSE	Thyroid hormone receptor-associated protein 3 OS=Mus musculus OX=10090 GN=Thrap3 PE=1 SV=1	36	36	442	35	183.88	1137.43	36	108.1	5.80009e+07	9.85682e+07	7.35697e+07	7.35697e+07	3.8118e+07	7.78549e+07	3.98035e+07	6.88364e+07	8.32691e+07	1.19557e+08	5.55366e+07	5.44956e+07	3.73159e+07	33	36	36	34	33	31	36	36	33	35	36	33	32	35	35	33	32	30	35	35	32	34	35	32
Q9D0J8	69202	Ptms	FALSE	Parathymosin OS=Mus musculus OX=10090 GN=Ptms PE=1 SV=3	80	9	442	9	46.868	1227.04	9	11.4	3.16366e+08	6.9253e+08	6.77956e+08	6.77956e+08	4.62951e+08	5.57152e+08	3.72994e+08	5.32464e+08	6.31659e+08	4.55145e+08	3.70114e+08	5.85835e+08	5.40928e+08	9	8	8	9	8	9	9	8	7	8	7	8	9	8	8	9	8	9	9	8	7	8	7	8
Q9DBR7	17931	Ppp1r12a	FALSE	Protein phosphatase 1 regulatory subunit 12A OS=Mus musculus OX=10090 GN=Ppp1r12a PE=1 SV=2	47	43	441	40	184.487	1153.59	43	114.9	2.95385e+07	5.56386e+07	5.91752e+07	5.91752e+07	4.26423e+07	5.26523e+07	3.63268e+07	5.00909e+07	5.16176e+07	4.36027e+07	4.5696e+07	6.65232e+07	5.73782e+07	36	37	36	38	39	40	39	37	35	35	40	39	33	34	33	35	36	37	36	34	32	33	37	36
Q6IRU2	326618	Tpm4	FALSE	Tropomyosin alpha-4 chain OS=Mus musculus OX=10090 GN=Tpm4 PE=1 SV=3	67	24	439	21	122.703	1230.57	24	28.5	1.63327e+08	3.67269e+08	4.17478e+08	4.17478e+08	2.46543e+08	3.18158e+08	2.01364e+08	3.35608e+08	3.39103e+08	2.88999e+08	2.88855e+08	4.28352e+08	3.75391e+08	24	24	24	24	24	24	24	24	24	24	24	24	21	21	21	21	21	21	21	21	21	21	21	21
Q9JLV1	29810	Bag3	FALSE	BAG family molecular chaperone regulator 3 OS=Mus musculus OX=10090 GN=Bag3 PE=1 SV=2	71	30	438	30	174.435	1285.17	30	61.8	7.36809e+07	9.51917e+07	1.22204e+08	1.22204e+08	6.91523e+07	6.34294e+07	4.51616e+07	1.02222e+08	1.15591e+08	8.30333e+07	5.81876e+07	9.50968e+07	8.35547e+07	28	27	29	28	27	27	28	28	29	27	28	28	28	27	29	28	27	27	28	28	29	27	28	28
P09055	16412	Itgb1	FALSE	Integrin beta-1 OS=Mus musculus OX=10090 GN=Itgb1 PE=1 SV=1	42	30	438	30	147.726	1155.38	30	88.2	1.20471e+08	1.75688e+08	2.46027e+08	2.46027e+08	1.52439e+08	2.01511e+08	1.29449e+08	1.38828e+08	1.65298e+08	1.99951e+08	1.64108e+08	1.84724e+08	1.97255e+08	23	24	24	27	23	23	22	27	27	25	29	25	23	24	24	27	23	23	22	27	27	25	29	25
Q9CQX2	66427	Cyb5b	TRUE	Cytochrome b5 type B OS=Mus musculus OX=10090 GN=Cyb5b PE=1 SV=1	73	10	433	10	81.344	1409.82	10	16.3	5.82512e+08	7.88245e+08	7.14413e+08	7.14413e+08	5.30346e+08	7.56312e+08	4.56671e+08	9.30339e+08	8.03967e+08	1.36056e+09	9.05532e+08	1.34198e+09	9.58165e+08	9	10	10	10	10	10	10	9	9	9	10	9	9	10	10	10	10	10	10	9	9	9	10	9
P57776	66656	Eef1d	FALSE	Elongation factor 1-delta OS=Mus musculus OX=10090 GN=Eef1d PE=1 SV=3	85	23	429	21	131.291	1254.92	23	31.3	3.66195e+08	5.74885e+08	4.24637e+08	4.24637e+08	2.94033e+08	423140344	2.7217e+08	3.42788e+08	3.47469e+08	5.07377e+08	4.00467e+08	2.84111e+08	3.95077e+08	21	23	23	20	23	21	23	23	22	21	21	22	19	21	21	18	21	19	21	21	20	19	19	20
P97855	27041	G3bp1	FALSE	Ras GTPase-activating protein-binding protein 1 OS=Mus musculus OX=10090 GN=G3bp1 PE=1 SV=1	63	22	428	21	137.901	1255.56	22	51.8	8.83329e+07	1.36424e+08	1.02382e+08	1.02382e+08	7.8562e+07	1.05227e+08	7.96321e+07	9.07279e+07	8.87944e+07	1.35283e+08	1.02729e+08	7.61513e+07	9.76123e+07	21	20	19	20	20	21	21	21	21	20	21	21	20	19	18	19	19	20	20	20	20	19	20	20
P15116	12558	Cdh2	FALSE	Cadherin-2 OS=Mus musculus OX=10090 GN=Cdh2 PE=1 SV=2	34	21	419	21	115.69	1288.46	21	99.7	1.63041e+08	2.1245e+08	2.84215e+08	2.84215e+08	1.76782e+08	249074454	1.44924e+08	2.01059e+08	2.13431e+08	1.8344e+08	1.90558e+08	2.67982e+08	2.03414e+08	20	20	20	20	20	20	20	21	21	20	21	20	20	20	20	20	20	20	20	21	21	20	21	20
Q8BMK4	216197	Ckap4	FALSE	Cytoskeleton-associated protein 4 OS=Mus musculus OX=10090 GN=Ckap4 PE=1 SV=2	69	34	419	34	158.743	1147.47	34	63.7	3.70793e+07	5.19641e+07	6.31045e+07	6.31045e+07	4.17223e+07	5.48388e+07	3.51155e+07	4.85494e+07	6.21384e+07	5.78328e+07	5.22603e+07	6.87916e+07	6.90728e+07	33	32	34	33	34	33	33	33	34	33	33	34	33	32	34	33	34	33	33	33	34	33	33	34
O08795	19089	Prkcsh	FALSE	Glucosidase 2 subunit beta OS=Mus musculus OX=10090 GN=Prkcsh PE=1 SV=1	32	20	417	20	105.62	1176.29	20	58.8	2.42552e+08	3.34666e+08	3.34493e+08	3.34493e+08	2.33832e+08	2.85368e+08	2.116e+08	2.77884e+08	2.91193e+08	3.53958e+08	3.03805e+08	3.26067e+08	2.97634e+08	20	19	20	20	20	20	19	20	20	20	19	20	20	19	20	20	20	20	19	20	20	20	19	20
Q8C196	227231	Cps1	TRUE	Carbamoyl-phosphate synthase [ammonia], mitochondrial OS=Mus musculus OX=10090 GN=Cps1 PE=1 SV=2	45	49	410	49	218.022	1198.83	49	164.5	6.30124e+07	1.00633e+08	7.54532e+07	7.54532e+07	6.08074e+07	1.94782e+08	7.92609e+07	7.81989e+07	8.0872e+07	1.58232e+08	1.1672e+08	9.8944e+07	8.05546e+07	34	33	27	38	48	36	32	37	38	42	36	35	34	33	27	38	48	36	32	37	38	42	36	35
Q3UZ39	16978	Lrrfip1	FALSE	Leucine-rich repeat flightless-interacting protein 1 OS=Mus musculus OX=10090 GN=Lrrfip1 PE=1 SV=2	53	33	409	32	190.371	1256.31	33	79.2	3.17533e+07	4.69416e+07	7.539e+07	7.539e+07	3.70626e+07	3.20029e+07	2.49501e+07	5.75032e+07	5.72443e+07	4.16691e+07	3.24549e+07	5.97041e+07	4.91519e+07	30	27	30	30	28	27	31	31	29	25	31	31	29	26	29	29	27	26	30	30	28	24	30	30
O08709	11758	Prdx6	TRUE	Peroxiredoxin-6 OS=Mus musculus OX=10090 GN=Prdx6 PE=1 SV=3	77	18	409	18	101.705	1185.98	18	24.9	4.7004e+08	8.07e+08	2.68907e+08	2.68907e+08	5.68603e+08	1.08692e+09	9.77417e+08	2.11907e+08	2.46954e+08	1.46343e+09	9.20741e+08	2.19292e+08	5.38052e+08	17	17	15	15	17	18	14	14	18	18	14	16	17	17	15	15	17	18	14	14	18	18	14	16
Q8BWT1	52538	Acaa2	TRUE	3-ketoacyl-CoA thiolase, mitochondrial OS=Mus musculus OX=10090 GN=Acaa2 PE=1 SV=3	68	22	409	22	144.808	1314.42	22	41.8	9.04984e+07	1.34481e+08	5.83609e+07	5.83609e+07	1.07786e+08	2.05899e+08	1.5404e+08	6.47542e+07	6.13524e+07	3.41614e+08	1.70288e+08	7.73072e+07	9.22716e+07	20	20	19	20	21	21	20	20	21	20	20	20	20	20	19	20	21	21	20	20	21	20	20	20
Q4VAA2	321022	Cdv3	FALSE	Protein CDV3 OS=Mus musculus OX=10090 GN=Cdv3 PE=1 SV=2	61	19	408	19	122.69	987.65	19	29.7	8.65044e+07	1.47325e+08	1.68587e+08	1.68587e+08	8.19508e+07	7.83054e+07	6.11385e+07	1.44906e+08	1.46751e+08	1.21046e+08	7.59695e+07	1.35347e+08	1.10069e+08	19	19	19	19	19	18	19	19	19	18	19	19	19	19	19	19	19	18	19	19	19	18	19	19
Q00897	20703	Serpina1d	FALSE	Alpha-1-antitrypsin 1-4 OS=Mus musculus OX=10090 GN=Serpina1d PE=1 SV=1	68	22	406	8	137.628	1243.46	22	46	5.77289e+08	6.44423e+08	4.95163e+08	4.95163e+08	3.00699e+08	4.59337e+08	3.0528e+08	3.42631e+08	3.94159e+08	5.76083e+08	4.03575e+08	2.59628e+08	3.36533e+08	21	17	19	17	18	18	19	20	18	18	17	19	8	7	7	8	8	8	7	8	8	8	7	8
P63158	15289	Hmgb1	FALSE	High mobility group protein B1 OS=Mus musculus OX=10090 GN=Hmgb1 PE=1 SV=2	65	22	400	21	133.339	1189.67	22	24.9	1.83832e+08	4.04075e+08	4.07302e+08	4.07302e+08	3.1029e+08	5.16322e+08	3.26986e+08	3.19879e+08	3.93137e+08	4.38794e+08	4.88066e+08	5.2494e+08	6.00936e+08	17	18	18	21	19	19	22	19	20	19	22	19	16	17	17	20	18	18	21	18	19	18	21	18
Q9QZQ1	17356	Afdn	FALSE	Afadin OS=Mus musculus OX=10090 GN=Afdn PE=1 SV=3	28	43	399	43	192.788	1048.62	43	206.4	2.96782e+07	6.34512e+07	4.63092e+07	4.63092e+07	3.64027e+07	5.65761e+07	3.25234e+07	4.85056e+07	4.89512e+07	2.85977e+07	3.53448e+07	5.20479e+07	4.34805e+07	35	38	34	35	38	40	35	37	30	39	33	36	35	38	34	35	38	40	35	37	30	39	33	36
Q5XG73	74159	Acbd5	FALSE	Acyl-CoA-binding domain-containing protein 5 OS=Mus musculus OX=10090 GN=Acbd5 PE=1 SV=1	45	22	398	22	134.186	1094.72	22	56.6	1.48212e+08	2.28682e+08	1.77023e+08	1.77023e+08	1.18148e+08	1.48863e+08	1.05969e+08	1.58307e+08	1.54601e+08	1.76019e+08	1.48893e+08	1.43725e+08	1.71131e+08	21	22	22	22	22	22	22	22	22	22	22	22	21	22	22	22	22	22	22	22	22	22	22	22
P26350	19231	Ptma	FALSE	Prothymosin alpha OS=Mus musculus OX=10090 GN=Ptma PE=1 SV=2	40	8	395	8	56.049	1323.17	8	12.2	1.49306e+08	2.72775e+08	3.63415e+08	3.63415e+08	2.39412e+08	1.95628e+08	1.29921e+08	2.58603e+08	3.95642e+08	1.96906e+08	1.66446e+08	2.51591e+08	2.44206e+08	8	8	8	8	8	8	8	8	8	8	8	8	8	8	8	8	8	8	8	8	8	8	8	8
Q5HZI1	102103	Mtus1	FALSE	Microtubule-associated tumor suppressor 1 homolog OS=Mus musculus OX=10090 GN=Mtus1 PE=1 SV=2	40	40	394	40	173.022	1072.64	40	134.3	2.86126e+07	4.91433e+07	4.62304e+07	4.62304e+07	2.93492e+07	3.73615e+07	2.59172e+07	3.2451e+07	3.58101e+07	3.91724e+07	3.2241e+07	3.55691e+07	3.26205e+07	36	36	37	37	36	36	37	37	36	33	38	36	36	36	37	37	36	36	37	37	36	33	38	36
Q9QZM0	54609	Ubqln2	FALSE	Ubiquilin-2 OS=Mus musculus OX=10090 GN=Ubqln2 PE=1 SV=2	32	12	394	8	126.181	1242.16	12	67.3	1.21016e+07	1.66803e+07	2.9294e+07	2.9294e+07	1.39874e+07	1.20949e+07	9.99813e+06	1.81639e+07	1.91833e+07	1.86627e+07	1.10509e+07	1.97754e+07	1.71217e+07	10	11	11	10	9	11	11	10	10	9	12	11	6	7	7	6	5	7	7	6	6	5	8	7
Q9Z315	20227	Sart1	FALSE	U4/U6.U5 tri-snRNP-associated protein 1 OS=Mus musculus OX=10090 GN=Sart1 PE=1 SV=1	50	33	392	33	172.649	1131.5	33	90.8	2.42157e+07	3.92373e+07	4.97145e+07	4.97145e+07	2.7957e+07	4.62489e+07	2.4892e+07	3.68889e+07	3.80319e+07	3.40198e+07	3.42136e+07	4.6882e+07	4.04128e+07	31	31	33	30	31	30	31	32	29	30	33	32	31	31	33	30	31	30	31	32	29	30	33	32
P43883	11520	Plin2	FALSE	Perilipin-2 OS=Mus musculus OX=10090 GN=Plin2 PE=1 SV=2	81	24	392	24	171.009	1112.87	24	46.6	1.10715e+08	1.7582e+08	1.24743e+08	1.24743e+08	3.42738e+08	3.51613e+08	4.19367e+08	7.41061e+07	1.22083e+08	2.07988e+08	2.66795e+08	1.7617e+08	2.05561e+08	22	21	21	23	24	24	22	20	20	24	23	23	22	21	21	23	24	24	22	20	20	24	23	23
P12787	12858	Cox5a	TRUE	Cytochrome c oxidase subunit 5A, mitochondrial OS=Mus musculus OX=10090 GN=Cox5a PE=1 SV=2	60	10	392	10	72.419	1187.95	10	16.1	7.20105e+08	1.02712e+09	1.03101e+09	1.03101e+09	5.92916e+08	8.13097e+08	6.04834e+08	1.069e+09	1.0772e+09	1.70312e+09	9.37554e+08	1.41784e+09	1.11353e+09	10	10	10	10	10	10	10	10	10	10	10	10	10	10	10	10	10	10	10	10	10	10	10	10
P32261	11905	Serpinc1	FALSE	Antithrombin-III OS=Mus musculus OX=10090 GN=Serpinc1 PE=1 SV=1	56	28	392	28	144.593	1028.63	28	52	8.34766e+07	1.32482e+08	1.51586e+08	1.51586e+08	7.0231e+07	9.68782e+07	7.87658e+07	9.68034e+07	1.12703e+08	1.17791e+08	7.66943e+07	1.47482e+08	1.10424e+08	25	27	26	25	26	24	25	26	26	24	26	26	25	27	26	25	26	24	25	26	26	24	26	26
E9QAT4	227648	Sec16a	FALSE	Protein transport protein Sec16A OS=Mus musculus OX=10090 GN=Sec16a PE=1 SV=1	26	39	390	39	187.949	1056.08	39	254	3.05867e+07	5.61586e+07	6.24489e+07	6.24489e+07	3.58139e+07	4.06153e+07	2.56592e+07	5.0299e+07	5.1402e+07	3.62633e+07	3.16339e+07	5.29095e+07	4.47482e+07	35	33	34	33	32	34	36	34	28	32	34	32	35	33	34	33	32	34	36	34	28	32	34	32
Q9JLQ0	12488	Cd2ap	FALSE	CD2-associated protein OS=Mus musculus OX=10090 GN=Cd2ap PE=1 SV=3	57	30	390	30	142.186	1125.38	30	70.4	3.83877e+07	8.29373e+07	6.86124e+07	6.86124e+07	5.03139e+07	6.47713e+07	4.37528e+07	6.03287e+07	7.69512e+07	6.4745e+07	5.99812e+07	7.82812e+07	7.87346e+07	30	29	30	29	29	30	30	30	30	29	30	30	30	29	30	29	29	30	30	30	30	29	30	30
P59325	217869	Eif5	FALSE	Eukaryotic translation initiation factor 5 OS=Mus musculus OX=10090 GN=Eif5 PE=1 SV=1	55	25	388	25	157.666	1068.35	25	48.9	1.30944e+08	2.02445e+08	1.88951e+08	1.88951e+08	1.21623e+08	1.60269e+08	1.10914e+08	1.38392e+08	1.43103e+08	2.16553e+08	1.55392e+08	1.29473e+08	1.52358e+08	23	24	23	23	22	23	23	25	25	25	24	24	23	24	23	23	22	23	23	25	25	25	24	24
Q80X50	74383	Ubap2l	FALSE	Ubiquitin-associated protein 2-like OS=Mus musculus OX=10090 GN=Ubap2l PE=1 SV=1	35	26	386	26	175.564	1137.84	26	116.7	5.38974e+07	9.69309e+07	1.036e+08	1.036e+08	5.80355e+07	7.0861e+07	4.55538e+07	9.198e+07	9.49781e+07	7.80373e+07	5.79967e+07	1.00026e+08	7.73453e+07	25	25	25	25	24	25	24	26	25	24	26	26	25	25	25	25	24	25	24	26	25	24	26	26
P62960	22608	Ybx1	FALSE	Y-box-binding protein 1 OS=Mus musculus OX=10090 GN=Ybx1 PE=1 SV=3	72	16	386	12	119.04	1206.15	16	35.7	1.35024e+08	2.02588e+08	2.36176e+08	2.36176e+08	1.39906e+08	1.67814e+08	1.08053e+08	1.90429e+08	1.64252e+08	1.51296e+08	1.61022e+08	2.07339e+08	1.73243e+08	16	15	16	16	16	15	16	16	16	16	16	15	12	11	12	12	12	11	12	12	12	12	12	11
P58771	22003	Tpm1	FALSE	Tropomyosin alpha-1 chain OS=Mus musculus OX=10090 GN=Tpm1 PE=1 SV=1	62	27	384	8	132.653	1057.12	27	32.7	4.61739e+08	9.65817e+08	9.30433e+08	9.30433e+08	5.6194e+08	8.25735e+08	5.09674e+08	8.06406e+08	8.90161e+08	8.5036e+08	7.34087e+08	1.06394e+09	8.33608e+08	24	24	24	25	25	24	23	25	25	24	24	25	7	8	7	8	7	7	7	8	8	7	7	8
Q9CPU0	109801	Glo1	FALSE	Lactoylglutathione lyase OS=Mus musculus OX=10090 GN=Glo1 PE=1 SV=3	89	18	382	18	81.745	893.19	18	20.8	7.37101e+08	1.12169e+09	1.02264e+09	1.02264e+09	9.39953e+08	1.50161e+09	6.97506e+08	4.78351e+08	9.66091e+08	2.19626e+09	8.95535e+08	4.0254e+08	1.17285e+09	17	17	18	18	18	18	17	18	18	17	17	18	17	17	18	18	18	18	17	18	18	17	17	18
P22599	20701	Serpina1b	FALSE	Alpha-1-antitrypsin 1-2 OS=Mus musculus OX=10090 GN=Serpina1b PE=1 SV=2	57	17	380	4	115.339	1196.45	17	45.9	5.69925e+07	6.2988e+07	5.11377e+07	5.11377e+07	4.03533e+07	6.68434e+07	4.44904e+07	2.6217e+07	3.30196e+07	7.64801e+07	5.57966e+07	2.77269e+07	4.27829e+07	16	14	16	13	14	14	16	16	14	14	14	15	4	4	4	4	4	4	4	4	4	4	4	4
Q60865	53872	Caprin1	FALSE	Caprin-1 OS=Mus musculus OX=10090 GN=Caprin1 PE=1 SV=2	47	21	379	21	119.054	1106.09	21	78.1	1.53242e+08	2.06959e+08	2.87035e+08	2.87035e+08	1.42842e+08	1.42126e+08	1.02319e+08	2.10858e+08	2.28024e+08	1.86173e+08	1.50116e+08	2.58032e+08	1.77747e+08	20	20	21	20	20	20	20	21	21	20	20	20	20	20	21	20	20	20	20	21	21	20	20	20
P10649	14862	Gstm1	FALSE	Glutathione S-transferase Mu 1 OS=Mus musculus OX=10090 GN=Gstm1 PE=1 SV=2	73	18	375	11	117.417	1022.56	18	26	9.42172e+07	1.34286e+08	7.21171e+07	7.21171e+07	1.52189e+08	2.80356e+08	2.23182e+08	5.08136e+07	8.43477e+07	2.61388e+08	2.32325e+08	5.42562e+07	1.31375e+08	17	16	16	17	17	18	16	16	17	18	16	16	10	10	10	11	11	11	10	10	11	11	10	10
P48036	11747	Anxa5	FALSE	Annexin A5 OS=Mus musculus OX=10090 GN=Anxa5 PE=1 SV=1	76	25	374	25	141.098	1064.33	25	35.7	1.9533e+08	4.1509e+08	1.46181e+08	1.46181e+08	2.62638e+08	4.52542e+08	4.15512e+08	1.00988e+08	1.37895e+08	6.56865e+08	4.1255e+08	8.61086e+07	3.07811e+08	21	23	20	23	22	25	22	21	24	23	21	25	21	23	20	23	22	25	22	21	24	23	21	25
P56480	11947	Atp5b	TRUE	ATP synthase subunit beta, mitochondrial OS=Mus musculus OX=10090 GN=Atp5f1b PE=1 SV=2	78	27	374	27	188.864	1141.84	27	56.3	6.85106e+07	8.60637e+07	7.46374e+07	7.46374e+07	7.27681e+07	1.57454e+08	1.00314e+08	6.08629e+07	6.37858e+07	2.11298e+08	1.18196e+08	9.07493e+07	7.80892e+07	25	24	22	26	27	26	24	22	27	26	23	23	25	24	22	26	27	26	24	22	27	26	23	23
Q80YR5	224902	Safb2	FALSE	Scaffold attachment factor B2 OS=Mus musculus OX=10090 GN=Safb2 PE=1 SV=2	36	30	374	21	147.368	1055.13	30	111.8	1.93572e+07	2.76028e+07	2.83356e+07	2.83356e+07	1.88748e+07	2.43542e+07	1.44872e+07	2.77456e+07	2.37932e+07	2.922e+07	2.02675e+07	3.07007e+07	2.21565e+07	28	28	28	27	29	26	29	26	29	28	29	27	20	20	19	19	21	18	20	18	20	21	20	19
Q9JHJ0	50875	Tmod3	FALSE	Tropomodulin-3 OS=Mus musculus OX=10090 GN=Tmod3 PE=1 SV=1	60	20	372	20	105.485	1012.17	20	39.5	7.58495e+07	1.15077e+08	9.60276e+07	9.60276e+07	7.70619e+07	1.10926e+08	8.03025e+07	8.13376e+07	8.80459e+07	1.15766e+08	1.0094e+08	8.98965e+07	1.13307e+08	20	19	19	20	20	20	20	20	19	19	20	20	20	19	19	20	20	20	20	20	19	19	20	20
P01901	14972	H2-K1	FALSE	H-2 class I histocompatibility antigen, K-B alpha chain OS=Mus musculus OX=10090 GN=H2-K1 PE=1 SV=1	66	18	371	6	104.29	986.57	18	41.3	1.67237e+08	2.0791e+08	1.09704e+08	1.09704e+08	1.09312e+08	2.49286e+08	1.64955e+08	1.51335e+08	3.37249e+08	1.67038e+08	2.75052e+08	1.48666e+08	2.73572e+08	18	17	16	12	18	17	18	17	17	18	17	18	6	5	4	2	6	5	6	5	5	6	5	6
Q9WVA4	21346	Tagln2	FALSE	Transgelin-2 OS=Mus musculus OX=10090 GN=Tagln2 PE=1 SV=4	72	14	370	12	97.614	993.57	14	22.4	9.62418e+07	2.41553e+08	2.21049e+08	2.21049e+08	1.49899e+08	237017178	1.56264e+08	1.43168e+08	1.97766e+08	2.16209e+08	2.26419e+08	1.68349e+08	2.38348e+08	14	14	14	14	14	14	14	14	14	14	14	14	12	12	12	12	12	12	12	12	12	12	12	12
E9PV24	14161	Fga	FALSE	Fibrinogen alpha chain OS=Mus musculus OX=10090 GN=Fga PE=1 SV=1	37	24	369	24	119.23	963.88	24	87.4	1.68228e+08	1.77193e+08	1.59326e+08	1.59326e+08	8.33129e+07	1.48515e+08	9.64439e+07	1.24685e+08	1.55824e+08	1.81844e+08	1.13169e+08	1.33833e+08	1.47915e+08	23	22	21	23	22	21	23	22	22	22	22	22	23	22	21	23	22	21	23	22	22	22	22	22
Q8BWS5	243385	Gprin3	FALSE	G protein-regulated inducer of neurite outgrowth 3 OS=Mus musculus OX=10090 GN=Gprin3 PE=1 SV=1	64	33	368	33	156.644	1089.26	33	80.4	3.34006e+07	6.25005e+07	6.48491e+07	6.48491e+07	2.90364e+07	3.64764e+07	2.35811e+07	5.35101e+07	5.62425e+07	5.28568e+07	3.12151e+07	5.10894e+07	4.02987e+07	27	29	32	29	25	24	31	31	30	26	29	28	27	29	32	29	25	24	31	31	30	26	29	28
Q61490	11658	Alcam	FALSE	CD166 antigen OS=Mus musculus OX=10090 GN=Alcam PE=1 SV=3	49	29	368	29	152.068	1057.81	29	65.1	7.25505e+07	9.52805e+07	1.198e+08	1.198e+08	7.14578e+07	1.10704e+08	6.92701e+07	7.44249e+07	9.25131e+07	1.41329e+08	9.60923e+07	7.29616e+07	9.8487e+07	28	27	29	27	27	27	26	27	27	27	26	27	28	27	29	27	27	27	26	27	27	27	26	27
D3YXK2	224903	Safb	FALSE	Scaffold attachment factor B1 OS=Mus musculus OX=10090 GN=Safb PE=1 SV=2	35	27	366	18	150.007	945.32	27	105	1.50096e+07	2.24036e+07	2.11799e+07	2.11799e+07	1.61889e+07	2.34115e+07	1.4033e+07	1.9196e+07	1.99071e+07	1.86421e+07	1.87382e+07	2.49528e+07	2.48741e+07	25	26	27	24	25	25	27	26	26	24	27	25	17	18	18	16	17	17	18	18	17	17	18	17
Q6AW69	68178	Cgnl1	FALSE	Cingulin-like protein 1 OS=Mus musculus OX=10090 GN=Cgnl1 PE=1 SV=2	41	48	365	48	177.468	949.68	48	148.1	1.97246e+07	3.50208e+07	2.63921e+07	2.63921e+07	2.22074e+07	2.37667e+07	1.91243e+07	3.19874e+07	2.75341e+07	2.14609e+07	2.1837e+07	3.63549e+07	2.38184e+07	42	40	41	42	41	39	43	45	39	42	44	39	42	40	41	42	41	39	43	45	39	42	44	39
Q05816	16592	Fabp5	FALSE	Fatty acid-binding protein 5 OS=Mus musculus OX=10090 GN=Fabp5 PE=1 SV=3	80	11	361	11	94.808	1020.61	11	15.1	2.77566e+08	3.74783e+08	2.31215e+08	2.31215e+08	3.34631e+08	4.92492e+08	3.18257e+08	2.43441e+08	4.26659e+08	5.97315e+08	5.71701e+08	4.34079e+08	5.85084e+08	11	10	9	10	11	10	10	11	11	11	11	11	11	10	9	10	11	10	10	11	11	11	11	11
P97450	11957	Atp5j	TRUE	ATP synthase-coupling factor 6, mitochondrial OS=Mus musculus OX=10090 GN=Atp5pf PE=1 SV=1	56	9	359	9	64.114	1097.55	9	12.5	6.30175e+08	1.24216e+09	1.26635e+09	1.26635e+09	8.72519e+08	1.00613e+09	7.55946e+08	1.16277e+09	1.18965e+09	1.23068e+09	6.62172e+08	1.35181e+09	9.74324e+08	9	9	9	9	9	9	9	9	9	9	9	9	9	9	9	9	9	9	9	9	9	9	9	9
Q00898	20704	Serpina1e	FALSE	Alpha-1-antitrypsin 1-5 OS=Mus musculus OX=10090 GN=Serpina1e PE=1 SV=1	41	16	359	7	113.505	1156.5	16	45.9	1.76182e+08	1.97912e+08	1.28311e+08	1.28311e+08	2.2751e+07	4.83794e+07	2.00479e+07	1.05788e+08	1.14476e+08	1.4394e+08	4.26104e+07	2.50282e+07	2.30631e+07	16	15	15	13	13	12	14	15	14	13	12	13	7	7	7	7	7	6	7	7	7	7	5	6
Q9Z2I0	56384	Letm1	TRUE	Mitochondrial proton/calcium exchanger protein OS=Mus musculus OX=10090 GN=Letm1 PE=1 SV=1	56	38	358	38	199.361	1143.48	38	82.9	3.67763e+07	5.54179e+07	6.548e+07	6.548e+07	48112093	5.82726e+07	4.02517e+07	5.28063e+07	5.19114e+07	9.5134e+07	6.68903e+07	7.17653e+07	4.0398e+07	35	33	31	33	35	33	35	33	35	35	32	34	35	33	31	33	35	33	35	33	35	35	32	34
P63028	22070	Tpt1	FALSE	Translationally-controlled tumor protein OS=Mus musculus OX=10090 GN=Tpt1 PE=1 SV=1	84	9	357	9	72.217	1106.79	9	19.5	2.82593e+08	4.59617e+08	4.73837e+08	4.73837e+08	2.22001e+08	2.45604e+08	1.76817e+08	3.71907e+08	4.97305e+08	3.87221e+08	3.00133e+08	3.57634e+08	3.25532e+08	9	9	9	9	9	9	9	9	9	9	9	9	9	9	9	9	9	9	9	9	9	9	9	9
Q8VCF0	228607	Mavs	TRUE	Mitochondrial antiviral-signaling protein OS=Mus musculus OX=10090 GN=Mavs PE=1 SV=1	62	15	356	15	108.776	1156.79	15	53.4	1.01446e+08	1.26977e+08	1.33817e+08	1.33817e+08	9.87719e+07	1.10103e+08	8.32533e+07	1.15621e+08	1.36389e+08	1.92506e+08	1.34966e+08	1.56633e+08	1.46829e+08	14	14	13	15	15	15	15	15	15	15	15	15	14	14	13	15	15	15	15	15	15	15	15	15
O70251	55949	Eef1b2	FALSE	Elongation factor 1-beta OS=Mus musculus OX=10090 GN=Eef1b PE=1 SV=5	82	17	355	15	117.059	1084.52	17	24.7	3.56527e+08	6.8415e+08	5.37426e+08	5.37426e+08	3.36103e+08	4.74974e+08	2.53393e+08	4.77046e+08	5.3762e+08	4.80883e+08	4.84664e+08	4.99167e+08	5.38597e+08	16	16	14	16	13	14	16	16	14	15	16	16	14	14	12	14	11	12	14	14	12	13	14	14
O70318	13822	Epb41l2	FALSE	Band 4.1-like protein 2 OS=Mus musculus OX=10090 GN=Epb41l2 PE=1 SV=2	42	36	353	35	170.299	957.84	36	109.9	2.18698e+07	3.64348e+07	3.07719e+07	3.07719e+07	2.79095e+07	3.67053e+07	1.91694e+07	3.20644e+07	3.30601e+07	2.24444e+07	2.59407e+07	4.85975e+07	3.52349e+07	31	30	30	30	33	27	31	32	30	32	32	31	30	29	29	29	32	26	30	31	29	31	31	30
Q3UGC7	78655	Eif3j1	FALSE	Eukaryotic translation initiation factor 3 subunit J-A OS=Mus musculus OX=10090 GN=Eif3j1 PE=2 SV=1	80	20	351	20	127.356	1055.29	20	29.3	1.21395e+08	2.02059e+08	2.12177e+08	2.12177e+08	1.20392e+08	1.35163e+08	8.85544e+07	1.56545e+08	1.9636e+08	1.69799e+08	1.28038e+08	1.75391e+08	1.46609e+08	18	19	18	19	19	18	19	20	18	18	20	19	18	19	18	19	19	18	19	20	18	18	20	19
O70400	54132	Pdlim1	FALSE	PDZ and LIM domain protein 1 OS=Mus musculus OX=10090 GN=Pdlim1 PE=1 SV=4	84	21	350	21	137.021	1069.1	21	35.8	7.21261e+07	1.33246e+08	1.0934e+08	1.0934e+08	1.06462e+08	1.38113e+08	1.07513e+08	1.02342e+08	1.30284e+08	1.21275e+08	1.41766e+08	1.27674e+08	1.47455e+08	20	20	20	20	20	20	20	21	21	21	21	21	20	20	20	20	20	20	20	21	21	21	21	21
Q8BTI8	75956	Srrm2	FALSE	Serine/arginine repetitive matrix protein 2 OS=Mus musculus OX=10090 GN=Srrm2 PE=1 SV=3	22	42	347	42	194.71	981.72	42	294.7	2.21068e+07	3.65388e+07	4.21511e+07	4.21511e+07	2.23835e+07	3.79464e+07	1.69043e+07	3.51733e+07	3.28605e+07	3.26575e+07	2.72105e+07	3.51476e+07	2.83263e+07	37	33	39	32	37	32	39	37	36	35	36	37	37	33	39	32	37	32	39	37	36	35	36	37
O88569	53379	Hnrnpa2b1	FALSE	Heterogeneous nuclear ribonucleoproteins A2/B1 OS=Mus musculus OX=10090 GN=Hnrnpa2b1 PE=1 SV=2	60	22	346	18	121.927	1020.71	22	37.4	2.57334e+08	4.04248e+08	2.06394e+08	2.06394e+08	2.58828e+08	4.12144e+08	3.07072e+08	2.11024e+08	2.31383e+08	3.95559e+08	3.59812e+08	1.80173e+08	2.52642e+08	22	21	21	22	22	22	22	22	22	22	22	22	18	17	18	18	18	18	18	18	18	18	18	18
Q9JHU2	114301	Palmd	FALSE	Palmdelphin OS=Mus musculus OX=10090 GN=Palmd PE=1 SV=1	58	25	346	25	134.763	1011.52	25	62.7	3.77761e+07	7.49713e+07	8.97094e+07	8.97094e+07	6.45622e+07	6.74049e+07	4.93617e+07	6.9214e+07	7.41922e+07	6.50676e+07	6.4461e+07	8.81803e+07	7.76716e+07	23	22	24	23	23	22	23	24	23	22	24	23	23	22	24	23	23	22	23	24	23	22	24	23
Q8K019	72567	Bclaf1	FALSE	Bcl-2-associated transcription factor 1 OS=Mus musculus OX=10090 GN=Bclaf1 PE=1 SV=2	33	31	346	30	153.162	855.23	31	105.9	2.33623e+07	4.67588e+07	4.29265e+07	4.29265e+07	1.93127e+07	4.17934e+07	2.00109e+07	3.51263e+07	3.95513e+07	3.4921e+07	3.00772e+07	3.13442e+07	2.71447e+07	31	29	29	30	30	30	29	31	30	30	27	28	30	28	28	29	29	29	28	30	29	29	26	27
Q9WTP7	56248	Ak3	TRUE	GTP:AMP phosphotransferase AK3, mitochondrial OS=Mus musculus OX=10090 GN=Ak3 PE=1 SV=3	78	18	344	18	95.875	900.19	18	25.4	2.74064e+08	3.92149e+08	2.36106e+08	2.36106e+08	2.72896e+08	4.17065e+08	3.48577e+08	2.25629e+08	2.41413e+08	7.71698e+08	4.55555e+08	2.35617e+08	3.62253e+08	18	18	17	18	18	18	17	17	18	18	17	18	18	18	17	18	18	18	17	17	18	18	17	18
P14733	16906	Lmnb1	FALSE	Lamin-B1 OS=Mus musculus OX=10090 GN=Lmnb1 PE=1 SV=3	57	37	343	32	157.729	931.7	37	66.7	3.36382e+07	5.95677e+07	4.87867e+07	4.87867e+07	3.8946e+07	6.30749e+07	4.92601e+07	4.8626e+07	4.14404e+07	5.41169e+07	5.68436e+07	5.80553e+07	4.73352e+07	32	31	30	33	34	36	29	31	33	35	31	34	28	28	26	29	29	31	25	28	30	30	27	31
Q9WV80	56440	Snx1	FALSE	Sorting nexin-1 OS=Mus musculus OX=10090 GN=Snx1 PE=1 SV=1	41	23	343	22	118.022	929.17	23	58.9	3.89286e+07	6.99001e+07	7.08868e+07	7.08868e+07	4.7547e+07	7.11191e+07	4.35689e+07	4.8848e+07	6.01551e+07	6.32886e+07	6.02992e+07	5.69965e+07	6.61505e+07	23	23	23	23	23	22	23	23	23	23	23	23	22	22	22	22	22	21	22	22	22	22	22	22
Q61937	18148	Npm1	FALSE	Nucleophosmin OS=Mus musculus OX=10090 GN=Npm1 PE=1 SV=1	63	18	341	18	133.905	1103.91	18	32.5	1.72221e+08	3.36067e+08	3.23822e+08	3.23822e+08	1.68872e+08	2.72553e+08	1.69851e+08	2.66658e+08	2.66786e+08	2.7579e+08	2.30995e+08	3.06975e+08	2.61951e+08	18	18	13	13	17	13	12	13	18	16	12	13	18	18	13	13	17	13	12	13	18	16	12	13
O09044	20619	Snap23	FALSE	Synaptosomal-associated protein 23 OS=Mus musculus OX=10090 GN=Snap23 PE=1 SV=1	72	13	340	13	101.835	966.97	13	23.2	3.85554e+07	6.90598e+07	7.208e+07	7.208e+07	3.96618e+07	5.75614e+07	3.23234e+07	5.14517e+07	6.3928e+07	5.97945e+07	5.43979e+07	6.6966e+07	5.42222e+07	13	13	13	13	13	13	13	13	13	13	13	13	13	13	13	13	13	13	13	13	13	13	13	13
P55302	16976	Lrpap1	FALSE	Alpha-2-macroglobulin receptor-associated protein OS=Mus musculus OX=10090 GN=Lrpap1 PE=1 SV=1	59	25	339	25	138.462	897.45	25	42.2	8.96793e+07	1.41935e+08	1.42787e+08	1.42787e+08	1.01046e+08	1.05892e+08	8.31877e+07	1.25067e+08	1.54886e+08	1.34877e+08	1.1849e+08	1.79945e+08	1.46324e+08	24	24	24	24	25	24	24	24	24	25	24	24	24	24	24	24	25	24	24	24	24	25	24	24
P29391	14325	Ftl1	FALSE	Ferritin light chain 1 OS=Mus musculus OX=10090 GN=Ftl1 PE=1 SV=2	66	11	339	11	76.941	986.88	11	20.8	2.08604e+08	3.8254e+08	4.00203e+08	4.00203e+08	7.49772e+08	6.06599e+08	5.72366e+08	3.15601e+08	3.11498e+08	4.30015e+08	4.90394e+08	4.63446e+08	7.42047e+08	11	11	11	11	11	11	11	11	11	11	11	11	11	11	11	11	11	11	11	11	11	11	11	11
Q3UJU9	67809	Rmdn3	TRUE	Regulator of microtubule dynamics protein 3 OS=Mus musculus OX=10090 GN=Rmdn3 PE=1 SV=2	49	22	339	22	122.593	1002.3	22	52	1.69627e+08	2.68206e+08	1.77571e+08	1.77571e+08	1.5114e+08	2.281e+08	1.37143e+08	1.58288e+08	1.67888e+08	2.64027e+08	2.25622e+08	1.69788e+08	2.09408e+08	21	22	21	22	22	22	20	22	22	22	21	22	21	22	21	22	22	22	20	22	22	22	21	22
Q63918	20324	Cavin2	FALSE	Caveolae-associated protein 2 OS=Mus musculus OX=10090 GN=Cavin2 PE=1 SV=3	68	22	338	22	127.26	947.56	22	46.7	3.56318e+07	4.82831e+07	6.6233e+07	6.6233e+07	4.64857e+07	6.29032e+07	3.63964e+07	4.46776e+07	5.5109e+07	5.93344e+07	5.8471e+07	6.93631e+07	6.6745e+07	22	21	21	21	21	22	22	22	20	22	22	22	22	21	21	21	21	22	22	22	20	22	22	22
O35215	13202	Ddt	FALSE	D-dopachrome decarboxylase OS=Mus musculus OX=10090 GN=Ddt PE=1 SV=3	91	9	338	9	61.105	891.97	9	13.1	2.60039e+08	4.29626e+08	2.29651e+08	2.29651e+08	4.76127e+08	7.43273e+08	5.21878e+08	1.58252e+08	2.58762e+08	6.39445e+08	5.46725e+08	2.13696e+08	4.23819e+08	9	9	8	9	9	9	9	9	9	9	9	9	9	9	8	9	9	9	9	9	9	9	9	9
Q8VCI5	19298	Pex19	FALSE	Peroxisomal biogenesis factor 19 OS=Mus musculus OX=10090 GN=Pex19 PE=1 SV=1	81	15	337	15	112.797	1135.98	15	32.7	8.14129e+07	1.49442e+08	1.55849e+08	1.55849e+08	8.61693e+07	9.607e+07	6.46326e+07	1.1692e+08	1.30491e+08	1.0855e+08	1.00298e+08	1.4954e+08	1.07607e+08	14	15	15	14	14	14	15	15	14	14	15	15	14	15	15	14	14	14	15	15	14	14	15	15
Q9ERD7	22152	Tubb3	FALSE	Tubulin beta-3 chain OS=Mus musculus OX=10090 GN=Tubb3 PE=1 SV=1	35	14	337	1	102.2	894.1	14	50.4	91310.7	156639			243850	422995	376316	67807	82968.6	571454	544829		187945	14	14	12	14	14	14	13	14	14	13	12	14	1	1	0	1	1	1	1	1	1	1	0	1
P43277	14957	H1f3	FALSE	Histone H1.3 OS=Mus musculus OX=10090 GN=H1-3 PE=1 SV=2	45	14	337	1	60.548	923.12	14	22.1	2.30348e+08	5.5041e+08	5.36383e+08	5.36383e+08	3.87721e+08	5.43687e+08	4.38974e+08	3.15735e+08	2.82528e+08	5.80824e+08	4.08207e+08	3.71072e+08	4.03342e+08	13	13	13	12	12	13	12	11	11	12	12	12	1	1	1	1	1	1	1	1	1	1	1	1
Q9ERG0	65970	Lima1	FALSE	LIM domain and actin-binding protein 1 OS=Mus musculus OX=10090 GN=Lima1 PE=1 SV=3	42	31	336	31	141.839	853.5	31	84	3.67825e+07	7.26227e+07	5.14055e+07	5.14055e+07	4.65876e+07	6.51424e+07	3.98972e+07	5.91904e+07	5.97593e+07	5.90821e+07	4.24921e+07	7.07573e+07	5.57824e+07	28	30	30	29	29	29	28	29	29	29	30	29	28	30	30	29	29	29	28	29	29	29	30	29
O35459	51798	Ech1	TRUE	Delta(3,5)-Delta(2,4)-dienoyl-CoA isomerase, mitochondrial OS=Mus musculus OX=10090 GN=Ech1 PE=1 SV=1	64	18	333	18	132.312	1021.79	18	36.1	5.83266e+07	1.01497e+08	3.18335e+07	3.18335e+07	7.65991e+07	1.54102e+08	1.13249e+08	2.44209e+07	2.25406e+07	2.45666e+08	1.22441e+08	2.34925e+07	6.17778e+07	17	17	15	17	18	18	16	15	18	17	17	17	17	17	15	17	18	18	16	15	18	17	17	17
P17751	21991	Tpi1	FALSE	Triosephosphate isomerase OS=Mus musculus OX=10090 GN=Tpi1 PE=1 SV=5	76	17	332	17	94.461	950.89	17	26.7	4.43818e+08	7.66357e+08	2.536e+08	2.536e+08	4.91347e+08	7.62471e+08	6.77971e+08	2.49554e+08	3.0667e+08	1.11909e+09	7.71835e+08	2.22439e+08	5.409e+08	17	16	14	17	15	16	16	16	17	17	15	16	17	16	14	17	15	16	16	16	17	17	15	16
P10639	22166	Txn1	FALSE	Thioredoxin OS=Mus musculus OX=10090 GN=Txn PE=1 SV=3	69	10	332	10	56.532	904.64	10	11.7	4.17437e+08	8.25786e+08	6.09081e+08	6.09081e+08	5.50963e+08	7.6494e+08	5.61598e+08	4.94063e+08	6.20346e+08	7.55776e+08	6.90242e+08	6.01038e+08	7.18043e+08	10	10	10	10	9	10	10	10	9	10	10	10	10	10	10	10	9	10	10	10	9	10	10	10
Q8C5W0	94040	Clmn	FALSE	Calmin OS=Mus musculus OX=10090 GN=Clmn PE=1 SV=2	45	33	328	33	155.987	916.47	33	117.2	2.45455e+07	4.5217e+07	2.99462e+07	2.99462e+07	2.91045e+07	3.85689e+07	2.73854e+07	2.828e+07	3.12431e+07	4.08502e+07	3.55101e+07	3.32299e+07	3.46556e+07	32	32	26	33	31	31	31	31	32	33	29	33	32	32	26	33	31	31	31	31	32	33	29	33
P63101	22631	Ywhaz	FALSE	14-3-3 protein zeta/delta OS=Mus musculus OX=10090 GN=Ywhaz PE=1 SV=1	80	20	328	13	107.028	887.35	20	27.8	1.56057e+08	2.6349e+08	9.82582e+07	9.82582e+07	1.73589e+08	2.96398e+08	2.34373e+08	8.67389e+07	9.17935e+07	3.52148e+08	2.6666e+08	6.95722e+07	1.66751e+08	19	19	18	18	20	20	17	18	19	20	18	18	13	13	13	13	13	13	12	13	13	13	13	13
Q99JB8	80708	Pacsin3	FALSE	Protein kinase C and casein kinase II substrate protein 3 OS=Mus musculus OX=10090 GN=Pacsin3 PE=1 SV=1	66	24	327	24	127.704	903.28	24	48.6	6.42528e+07	1.03242e+08	1.12499e+08	1.12499e+08	6.57108e+07	8.76156e+07	5.58161e+07	7.69675e+07	8.74985e+07	1.01859e+08	7.92118e+07	8.31511e+07	8.0339e+07	23	21	20	23	22	21	21	23	22	22	21	23	23	21	20	23	22	21	21	23	22	22	21	23
Q9D281	68303	Fam114a1	FALSE	Protein Noxp20 OS=Mus musculus OX=10090 GN=Fam114a1 PE=1 SV=1	69	27	325	27	170.851	958.45	27	61	3.64234e+07	7.56732e+07	7.67998e+07	7.67998e+07	4.62392e+07	6.4197e+07	3.84378e+07	5.03958e+07	6.02155e+07	8.6247e+07	4.69479e+07	4.79101e+07	4.56801e+07	25	26	26	26	22	24	27	26	26	25	27	26	25	26	26	26	22	24	27	26	26	25	27	26
P15864	50708	H1f2	FALSE	Histone H1.2 OS=Mus musculus OX=10090 GN=H1-2 PE=1 SV=2	47	13	324	3	59.674	926.32	13	21.3	1.31996e+07	2.58607e+07	4.03916e+07	4.03916e+07	1.54214e+07	1.91283e+07	1.06769e+07	2.31618e+07	2.34335e+07	1.70582e+07	1.78535e+07	3.27168e+07	2.17252e+07	12	13	13	12	12	13	13	12	11	12	12	12	2	3	3	3	3	3	3	3	3	3	3	3
Q61029	21917	Tmpo	FALSE	Lamina-associated polypeptide 2, isoforms beta/delta/epsilon/gamma OS=Mus musculus OX=10090 GN=Tmpo PE=1 SV=4	64	22	323	11	109.42	1076.82	22	50.3	8.1251e+07	1.43278e+08	1.51151e+08	1.51151e+08	1.07491e+08	1.44992e+08	1.0233e+08	1.16805e+08	1.31575e+08	1.37268e+08	1.3382e+08	1.54975e+08	1.61961e+08	22	22	21	22	20	22	21	22	22	21	22	22	11	11	10	11	9	11	11	11	11	10	11	11
Q99KN9	216705	Clint1	FALSE	Clathrin interactor 1 OS=Mus musculus OX=10090 GN=Clint1 PE=1 SV=2	35	23	323	23	135.519	874.02	23	68.5	9.0241e+07	1.58533e+08	1.8175e+08	1.8175e+08	1.04107e+08	1.45577e+08	8.53019e+07	1.29523e+08	1.47554e+08	1.47115e+08	1.22423e+08	1.82439e+08	1.54677e+08	22	23	21	23	23	21	22	23	22	23	23	23	22	23	21	23	23	21	22	23	22	23	23	23
Q8BUK6	320191	Hook3	FALSE	Protein Hook homolog 3 OS=Mus musculus OX=10090 GN=Hook3 PE=1 SV=2	48	29	323	29	129.852	944.06	29	83.2	3.69221e+07	4.9344e+07	4.90229e+07	4.90229e+07	2.8952e+07	3.19348e+07	2.43901e+07	3.94267e+07	3.87413e+07	4.74245e+07	3.27662e+07	4.21367e+07	4.11779e+07	29	29	28	28	27	29	29	28	29	29	29	29	29	29	28	28	27	29	29	28	29	29	29	29
Q8K3J1	225887	Ndufs8	TRUE	NADH dehydrogenase [ubiquinone] iron-sulfur protein 8, mitochondrial OS=Mus musculus OX=10090 GN=Ndufs8 PE=1 SV=1	56	14	321	14	66.071	727.94	14	24	1.5434e+08	2.49922e+08	2.60903e+08	2.60903e+08	1.36263e+08	1.91371e+08	1.40874e+08	1.09089e+08	1.18636e+08	1.09831e+08	1.4821e+08	7.69792e+07	1.5415e+08	14	13	14	12	13	13	13	12	12	14	13	13	14	13	14	12	13	13	13	12	12	14	13	13
Q9D855	67530	Uqcrb	TRUE	Cytochrome b-c1 complex subunit 7 OS=Mus musculus OX=10090 GN=Uqcrb PE=1 SV=3	76	15	321	15	65.202	866.57	15	13.5	4.34851e+08	8.58529e+08	8.72398e+08	8.72398e+08	4.51597e+08	7.02617e+08	4.78474e+08	8.83511e+08	7.69161e+08	1.24751e+09	6.52727e+08	9.07367e+08	7.68104e+08	14	14	13	14	15	14	14	15	15	14	15	15	14	14	13	14	15	14	14	15	15	14	15	15
Q60605	17904	Myl6	FALSE	Myosin light polypeptide 6 OS=Mus musculus OX=10090 GN=Myl6 PE=1 SV=3	75	12	319	8	73.395	902.42	12	16.9	3.31889e+08	6.20377e+08	6.83571e+08	6.83571e+08	4.15482e+08	5.465e+08	4.12475e+08	4.50536e+08	5.94157e+08	5.62624e+08	4.97974e+08	6.51337e+08	6.22927e+08	12	12	12	12	12	12	12	12	12	12	12	12	8	8	8	8	8	8	8	8	8	8	8	8
Q9R0A0	56273	Pex14	FALSE	Peroxisomal membrane protein PEX14 OS=Mus musculus OX=10090 GN=Pex14 PE=1 SV=1	84	22	318	22	154.726	1034.66	22	41.2	1.1034e+08	1.47725e+08	1.74938e+08	1.74938e+08	1.01681e+08	1.26896e+08	7.30138e+07	1.3799e+08	1.2917e+08	1.30654e+08	1.21881e+08	1.51941e+08	1.437e+08	20	21	21	21	21	21	20	21	19	20	19	21	20	21	21	21	21	21	20	21	19	20	19	21
Q8BVZ1	66968	Plin5	FALSE	Perilipin-5 OS=Mus musculus OX=10090 GN=Plin5 PE=1 SV=1	74	23	318	23	143.085	961.76	23	50.4	1.74935e+07	2.97746e+07	2.8783e+07	2.8783e+07	4.90575e+07	5.26664e+07	5.85893e+07	1.5995e+07	2.1317e+07	5.16692e+07	4.33454e+07	2.38287e+07	4.33538e+07	20	18	21	22	20	23	19	22	21	22	22	22	20	18	21	22	20	23	19	22	21	22	22	22
Q99JF8	101739	Psip1	FALSE	PC4 and SFRS1-interacting protein OS=Mus musculus OX=10090 GN=Psip1 PE=1 SV=1	44	23	316	22	117.075	896.41	23	59.7	1.81492e+07	3.41737e+07	4.15965e+07	4.15965e+07	2.5313e+07	3.55783e+07	2.09605e+07	2.97304e+07	3.7027e+07	3.10446e+07	3.02013e+07	3.45521e+07	3.36579e+07	21	21	22	23	21	21	21	22	20	21	23	21	20	20	21	22	20	20	20	21	19	20	22	20
Q64213	22668	Sf1	FALSE	Splicing factor 1 OS=Mus musculus OX=10090 GN=Sf1 PE=1 SV=6	30	17	312	17	115.523	910.25	17	70.4	5.12279e+07	8.12562e+07	6.27032e+07	6.27032e+07	5.00519e+07	7.94939e+07	4.76709e+07	5.79739e+07	6.28428e+07	6.92992e+07	6.43967e+07	6.61965e+07	6.70383e+07	17	16	15	17	17	17	16	17	14	17	16	17	17	16	15	17	17	17	16	17	14	17	16	17
Q8K1Z0	67914	Coq9	TRUE	Ubiquinone biosynthesis protein COQ9, mitochondrial OS=Mus musculus OX=10090 GN=Coq9 PE=1 SV=1	48	11	311	11	88.465	888.17	11	35.1	1.5296e+08	2.22458e+08	1.37896e+08	1.37896e+08	1.58284e+08	2.46066e+08	1.69229e+08	1.16964e+08	1.27792e+08	2.96997e+08	2.36864e+08	1.30745e+08	2.13088e+08	10	10	10	10	10	10	10	10	10	10	10	10	10	10	10	10	10	10	10	10	10	10	10	10
Q64523	319176	H2ac20	FALSE	Histone H2A type 2-C OS=Mus musculus OX=10090 GN=H2ac20 PE=1 SV=3	64	8	309	3	45.507	724.26	8	14	4.12797e+07	1.55084e+07	1.43492e+07	1.43492e+07	1.40299e+07	2.24516e+07	3.2528e+07	3.1106e+07	1.41712e+07	2.35865e+07	7.87651e+07	3.22041e+07	6.94482e+07	8	7	7	8	8	7	7	8	7	8	8	8	3	3	3	3	3	3	3	3	3	3	3	3
P09671	20656	Sod2	TRUE	Superoxide dismutase [Mn], mitochondrial OS=Mus musculus OX=10090 GN=Sod2 PE=1 SV=3	80	14	309	14	83.049	918.66	14	24.6	2.81123e+08	5.21662e+08	1.93225e+08	1.93225e+08	2.94274e+08	4.36623e+08	3.66818e+08	3.11198e+08	2.49687e+08	7.3862e+08	5.47907e+08	3.08828e+08	3.87876e+08	13	11	12	13	12	13	13	13	13	14	13	13	13	11	12	13	12	13	13	13	13	14	13	13
Q62418	13169	Dbnl	FALSE	Drebrin-like protein OS=Mus musculus OX=10090 GN=Dbnl PE=1 SV=2	54	23	308	23	106.446	868.22	23	48.7	4.51407e+07	7.96954e+07	6.80239e+07	6.80239e+07	4.72434e+07	6.85959e+07	4.28018e+07	6.02864e+07	8.26866e+07	7.38219e+07	5.88123e+07	6.77808e+07	6.87435e+07	22	22	22	22	21	21	21	22	22	22	22	22	22	22	22	22	21	21	21	22	22	22	22	22
Q03265	11946	Atp5a1	TRUE	ATP synthase subunit alpha, mitochondrial OS=Mus musculus OX=10090 GN=Atp5f1a PE=1 SV=1	35	15	307	15	86.086	902.21	15	59.7	6.97824e+07	1.29799e+08	1.45027e+08	1.45027e+08	8.42536e+07	1.19598e+08	7.58981e+07	1.47817e+08	1.19064e+08	1.40917e+08	9.4059e+07	1.69284e+08	1.0733e+08	14	13	12	13	15	13	14	14	13	13	14	14	14	13	12	13	15	13	14	14	13	13	14	14
P21619	16907	Lmnb2	FALSE	Lamin-B2 OS=Mus musculus OX=10090 GN=Lmnb2 PE=1 SV=2	64	35	307	30	140.578	767.39	35	67.3	2.03019e+07	3.20838e+07	1.27391e+07	1.27391e+07	2.22807e+07	3.94684e+07	3.35999e+07	1.6153e+07	1.18817e+07	3.39039e+07	3.44113e+07	1.65102e+07	2.86696e+07	32	30	25	29	33	33	30	27	30	34	31	31	28	27	21	25	28	28	26	24	27	29	27	28
Q8C7G5	66113	Apoa5	FALSE	Apolipoprotein A-V OS=Mus musculus OX=10090 GN=Apoa5 PE=1 SV=1	67	21	306	21	120.956	936.35	21	41.2	5.32426e+07	7.95835e+07	9.29194e+07	9.29194e+07	4.88772e+07	7.59872e+07	4.17098e+07	6.96491e+07	9.20223e+07	5.15137e+07	7.07056e+07	9.23121e+07	8.07211e+07	19	20	20	19	20	19	19	21	20	20	20	21	19	20	20	19	20	19	19	21	20	20	20	21
Q99NB8	94232	Ubqln4	FALSE	Ubiquilin-4 OS=Mus musculus OX=10090 GN=Ubqln4 PE=1 SV=1	35	12	305	9	106.528	906.71	12	63.5	7.09258e+06	1.06733e+07	1.26186e+07	1.26186e+07	8.48887e+06	1.01535e+07	5.92972e+06	9.77986e+06	1.11517e+07	8.9835e+06	9.59703e+06	1.55555e+07	1.41269e+07	11	10	12	11	12	10	11	12	11	11	12	12	8	7	9	8	9	7	8	9	8	8	9	9
B9EKI3	232286	Tmf1	FALSE	TATA element modulatory factor OS=Mus musculus OX=10090 GN=Tmf1 PE=1 SV=2	44	40	305	40	160.698	840.49	40	121.7	1.7015e+07	2.25778e+07	3.33703e+07	3.33703e+07	1.72376e+07	1.74189e+07	1.32783e+07	2.42682e+07	2.69929e+07	1.48247e+07	1.58278e+07	3.24578e+07	2.09795e+07	38	33	35	36	29	35	38	37	31	33	38	36	38	33	35	36	29	35	38	37	31	33	38	36
Q3UM45	66385	Ppp1r7	FALSE	Protein phosphatase 1 regulatory subunit 7 OS=Mus musculus OX=10090 GN=Ppp1r7 PE=1 SV=2	66	18	305	18	117.372	905.99	18	41.3	3.76969e+07	6.5036e+07	2.90127e+07	2.90127e+07	4.00295e+07	6.5412e+07	4.74349e+07	1.73458e+07	2.07023e+07	8.32998e+07	5.8932e+07	1.2039e+07	4.10436e+07	17	18	18	18	18	18	18	18	18	18	15	18	17	18	18	18	18	18	18	18	18	18	15	18
Q9D5V6	67043	Syap1	FALSE	Synapse-associated protein 1 OS=Mus musculus OX=10090 GN=Syap1 PE=1 SV=1	79	28	303	28	126.908	866.41	28	41.3	2.55868e+07	3.64007e+07	3.29537e+07	3.29537e+07	2.45836e+07	2.50489e+07	1.98587e+07	2.54702e+07	2.83997e+07	4.12142e+07	2.84532e+07	2.91294e+07	3.15114e+07	22	25	24	25	24	23	24	25	24	23	25	23	22	25	24	25	24	23	24	25	24	23	25	23
Q61792	16796	Lasp1	FALSE	LIM and SH3 domain protein 1 OS=Mus musculus OX=10090 GN=Lasp1 PE=1 SV=1	72	17	303	17	103.602	878.34	17	30	1.36222e+08	2.38863e+08	2.39153e+08	2.39153e+08	1.43522e+08	1.82397e+08	1.2223e+08	2.11887e+08	2.64294e+08	2.45037e+08	1.63747e+08	1.9821e+08	1.97971e+08	16	17	17	17	17	17	17	17	17	16	17	17	16	17	17	17	17	17	17	17	17	16	17	17
Q8BFU2	319162	H2aw	FALSE	Histone H2A type 3 OS=Mus musculus OX=10090 GN=H2aw PE=1 SV=3	64	8	301	2	36.09	687.39	8	14.1	5.78945e+08	1.19254e+09	4.03618e+08	4.03618e+08	7.70403e+08	1.39983e+09	1.10419e+09	8.17311e+08	6.36008e+08	1.46997e+09	1.13553e+09	6.21745e+08	1.34026e+09	8	7	6	8	8	7	7	8	7	8	8	8	2	2	1	2	2	2	2	2	2	2	2	2
Q60902	13859	Eps15l1	FALSE	Epidermal growth factor receptor substrate 15-like 1 OS=Mus musculus OX=10090 GN=Eps15l1 PE=1 SV=3	59	38	301	38	151.324	890.3	38	99.2	3.93596e+07	8.85728e+07	3.74519e+07	3.74519e+07	4.80663e+07	7.84044e+07	6.18252e+07	4.04826e+07	3.97036e+07	9.0656e+07	6.25761e+07	5.23795e+07	5.56327e+07	26	30	28	31	33	33	28	29	28	32	30	31	26	30	28	31	33	33	28	29	28	32	30	31
Q3THE2	67938	Myl12b	FALSE	Myosin regulatory light chain 12B OS=Mus musculus OX=10090 GN=Myl12b PE=1 SV=2	80	10	301	5	83.632	917.69	10	19.8	2.96052e+08	5.77011e+08	5.72344e+08	5.72344e+08	3.2456e+08	4.82078e+08	3.43185e+08	4.18871e+08	4.82501e+08	5.12682e+08	4.56513e+08	5.20231e+08	4.92199e+08	10	10	10	10	10	10	10	10	10	10	10	10	5	5	5	5	5	5	5	5	5	5	5	5
Q64152	218490	Btf3	FALSE	Transcription factor BTF3 OS=Mus musculus OX=10090 GN=Btf3 PE=1 SV=3	77	12	301	11	88.803	986.6	12	22	1.15592e+08	1.83807e+08	1.48882e+08	1.48882e+08	1.04587e+08	1.24437e+08	8.62901e+07	1.42842e+08	1.49874e+08	1.54461e+08	1.24564e+08	1.44581e+08	1.44593e+08	11	12	12	12	11	12	12	11	11	12	12	12	11	11	11	11	11	11	11	11	11	11	11	11
Q99KJ8	69654	Dctn2	FALSE	Dynactin subunit 2 OS=Mus musculus OX=10090 GN=Dctn2 PE=1 SV=3	67	19	301	19	116.022	904.59	19	44.1	8.86113e+07	1.47301e+08	1.71586e+08	1.71586e+08	9.05379e+07	1.07147e+08	7.3642e+07	1.16895e+08	1.40086e+08	1.3019e+08	1.12997e+08	1.57586e+08	1.27422e+08	19	18	19	18	17	18	18	19	18	18	19	19	19	18	19	18	17	18	18	19	18	18	19	19
P17182	13806	Eno1	FALSE	Alpha-enolase OS=Mus musculus OX=10090 GN=Eno1 PE=1 SV=3	57	19	300	19	113.919	903.44	19	47.1	45227776	74628930	3.42601e+07	3.42601e+07	5.65122e+07	9.85465e+07	9.76453e+07	2.96665e+07	3.26483e+07	1.46025e+08	8.80561e+07	3.17955e+07	5.49888e+07	18	18	15	18	19	19	17	17	19	19	16	19	18	18	15	18	19	19	17	17	19	19	16	19
P68254	22630	Ywhaq	FALSE	14-3-3 protein theta OS=Mus musculus OX=10090 GN=Ywhaq PE=1 SV=1	63	18	298	11	96.307	780.85	18	27.8	3.93915e+07	6.29718e+07	2.12215e+07	2.12215e+07	4.47469e+07	7.46087e+07	5.73054e+07	2.14504e+07	2.18474e+07	8.20292e+07	7.03113e+07	1.14188e+07	4.42039e+07	18	18	17	18	18	18	16	18	18	18	17	18	11	11	10	11	11	11	9	11	11	11	10	11
P58774	22004	Tpm2	FALSE	Tropomyosin beta chain OS=Mus musculus OX=10090 GN=Tpm2 PE=1 SV=1	52	20	298	7	89.462	792.56	20	32.8	8.6242e+06	1.65831e+07	1.88223e+07	1.88223e+07	1.57429e+07	1.36567e+07	1.04802e+07	1.58966e+07	1.68898e+07	1.27877e+07	1.41622e+07	2.54704e+07	1.81002e+07	17	17	17	18	19	18	17	18	17	18	18	18	6	7	6	7	7	7	7	7	6	7	7	7
P10711	21399	Tcea1	FALSE	Transcription elongation factor A protein 1 OS=Mus musculus OX=10090 GN=Tcea1 PE=1 SV=2	66	20	298	20	112.891	828.18	20	33.9	3.50668e+07	6.86285e+07	6.43012e+07	6.43012e+07	4.65434e+07	6.96718e+07	4.03552e+07	4.75078e+07	5.99069e+07	5.67046e+07	6.23906e+07	6.7405e+07	6.6723e+07	17	18	18	17	17	17	17	20	19	18	19	17	17	18	18	17	17	17	17	20	19	18	19	17
Q922R8	71853	Pdia6	FALSE	Protein disulfide-isomerase A6 OS=Mus musculus OX=10090 GN=Pdia6 PE=1 SV=3	50	17	297	17	95.671	914.47	17	48.1	3.5667e+08	5.40202e+08	2.88868e+08	2.88868e+08	2.65456e+08	3.84722e+08	2.91086e+08	2.26567e+08	2.26651e+08	6.48584e+08	4.03434e+08	1.37672e+08	3.25311e+08	16	15	15	15	16	15	15	16	16	15	15	15	16	15	15	15	16	15	15	16	16	15	15	15
Q4PZA2	230857	Ece1	FALSE	Endothelin-converting enzyme 1 OS=Mus musculus OX=10090 GN=Ece1 PE=1 SV=1	39	26	297	26	122.996	743.92	26	87	2.95381e+07	3.04823e+07	3.95491e+07	3.95491e+07	2.56937e+07	2.40367e+07	2.32764e+07	2.75477e+07	3.03506e+07	3.99865e+07	2.82977e+07	3.10635e+07	4.05292e+07	25	25	23	23	22	25	22	24	24	22	23	26	25	25	23	23	22	25	22	24	24	22	23	26
Q9WTX5	21402	Skp1	FALSE	S-phase kinase-associated protein 1 OS=Mus musculus OX=10090 GN=Skp1 PE=1 SV=3	80	11	296	11	89.579	929.28	11	18.7	7.55147e+07	1.16456e+08	9.41449e+07	9.41449e+07	6.92595e+07	9.34755e+07	6.23357e+07	8.02337e+07	9.26906e+07	1.171e+08	9.89506e+07	8.60468e+07	1.03196e+08	11	11	11	11	11	11	11	11	11	11	11	11	11	11	11	11	11	11	11	11	11	11	11	11
Q80VP1	13854	Epn1	FALSE	Epsin-1 OS=Mus musculus OX=10090 GN=Epn1 PE=1 SV=3	46	16	296	16	119.29	902.28	16	60.2	5.4789e+07	7.55285e+07	8.96875e+07	8.96875e+07	4.59038e+07	5.8087e+07	3.89617e+07	5.86683e+07	6.84027e+07	7.77847e+07	4.94683e+07	7.20305e+07	6.79814e+07	15	14	16	15	15	15	14	15	15	15	15	15	15	14	16	15	15	15	14	15	15	15	15	15
Q9Z1M8	24010	Ik	FALSE	Protein Red OS=Mus musculus OX=10090 GN=Ik PE=1 SV=2	48	25	294	25	143.393	780.29	25	65.6	2.56987e+07	4.21961e+07	5.48827e+07	5.48827e+07	2.86781e+07	3.96005e+07	2.39192e+07	3.59743e+07	4.00058e+07	3.8068e+07	3.22461e+07	4.63023e+07	3.95838e+07	21	24	23	23	24	23	22	24	24	23	24	23	21	24	23	23	24	23	22	24	24	23	24	23
Q922Q8	98238	Lrrc59	FALSE	Leucine-rich repeat-containing protein 59 OS=Mus musculus OX=10090 GN=Lrrc59 PE=1 SV=1	58	17	294	17	88.392	886.93	17	34.9	3.48583e+08	6.31033e+08	5.52545e+08	5.52545e+08	3.27326e+08	4.38514e+08	2.96847e+08	4.54503e+08	4.42766e+08	5.48319e+08	4.72928e+08	4.58202e+08	4.37656e+08	15	16	17	15	16	15	15	16	16	15	16	16	15	16	17	15	16	15	15	16	16	15	16	16
Q9QYE6	27277	Golga5	FALSE	Golgin subfamily A member 5 OS=Mus musculus OX=10090 GN=Golga5 PE=1 SV=2	60	32	294	32	150.788	878.5	32	82.3	1.76279e+07	3.03615e+07	3.63475e+07	3.63475e+07	1.74046e+07	2.79488e+07	1.68246e+07	1.65705e+07	2.00845e+07	2.87738e+07	2.02546e+07	1.52378e+07	2.04007e+07	31	30	27	28	29	29	26	28	29	30	27	29	31	30	27	28	29	29	26	28	29	30	27	29
O35114	12492	Scarb2	FALSE	Lysosome membrane protein 2 OS=Mus musculus OX=10090 GN=Scarb2 PE=1 SV=3	34	15	292	15	82.787	793.96	15	54	1.19542e+08	1.39382e+08	2.03092e+08	2.03092e+08	9.04517e+07	1.00765e+08	6.88693e+07	1.40329e+08	1.54196e+08	1.42039e+08	1.13392e+08	1.68295e+08	1.47233e+08	15	15	15	15	15	15	15	15	15	15	15	15	15	15	15	15	15	15	15	15	15	15	15	15
Q60668	11991	Hnrnpd	FALSE	Heterogeneous nuclear ribonucleoprotein D0 OS=Mus musculus OX=10090 GN=Hnrnpd PE=1 SV=2	41	16	290	14	87.234	675.55	16	38.3	5.52373e+07	8.72488e+07	86898020	86898020	6.56123e+07	1.04662e+08	6.56981e+07	5.74872e+07	6.88299e+07	1.01345e+08	8.88985e+07	6.14303e+07	8.30014e+07	15	14	14	16	16	16	13	15	16	15	14	16	13	12	12	14	14	14	11	13	14	13	12	14
P54728	19359	Rad23b	FALSE	UV excision repair protein RAD23 homolog B OS=Mus musculus OX=10090 GN=Rad23b PE=1 SV=2	53	15	288	13	91.003	794.66	15	43.5	2.17057e+08	3.26902e+08	3.3396e+08	3.3396e+08	2.31686e+08	2.50625e+08	1.75163e+08	2.33161e+08	2.64388e+08	2.98997e+08	2.15221e+08	2.37832e+08	2.40233e+08	15	15	15	15	15	15	15	15	15	15	15	15	13	13	13	13	13	13	13	13	13	13	13	13
Q9CR16	67738	Ppid	FALSE	Peptidyl-prolyl cis-trans isomerase D OS=Mus musculus OX=10090 GN=Ppid PE=1 SV=3	68	23	287	23	108.12	802.57	23	40.7	9.75863e+07	1.39305e+08	8.68635e+07	8.68635e+07	8.47562e+07	1.36038e+08	9.33906e+07	7.36771e+07	7.29266e+07	1.55161e+08	1.35443e+08	6.73569e+07	1.0955e+08	18	20	17	19	20	20	19	20	20	22	19	19	18	20	17	19	20	20	19	20	20	22	19	19
P09411	18655	Pgk1	FALSE	Phosphoglycerate kinase 1 OS=Mus musculus OX=10090 GN=Pgk1 PE=1 SV=4	55	19	286	19	115.769	757.8	19	44.5	6.61869e+07	9.64761e+07	3.45677e+07	3.45677e+07	6.61448e+07	1.24446e+08	1.15618e+08	3.06237e+07	3.1788e+07	1.72018e+08	1.13114e+08	2.54349e+07	6.17783e+07	18	18	16	18	18	18	15	18	19	18	16	18	18	18	16	18	18	18	15	18	19	18	16	18
O35685	18221	Nudc	FALSE	Nuclear migration protein nudC OS=Mus musculus OX=10090 GN=Nudc PE=1 SV=1	68	23	286	23	107.56	731.87	23	38.3	3.61416e+07	5.80952e+07	3.32508e+07	3.32508e+07	3.6387e+07	5.78864e+07	4.17065e+07	3.05235e+07	2.98153e+07	6.77403e+07	5.06136e+07	2.1461e+07	4.00905e+07	23	23	23	23	23	22	23	22	23	23	23	23	23	23	23	23	23	22	23	22	23	23	23	23
Q99020	15384	Hnrnpab	FALSE	Heterogeneous nuclear ribonucleoprotein A/B OS=Mus musculus OX=10090 GN=Hnrnpab PE=1 SV=1	47	20	286	19	83.248	726.53	20	30.8	1.30837e+08	2.17175e+08	1.94243e+08	1.94243e+08	1.42119e+08	2.02799e+08	1.35221e+08	1.64248e+08	1.83692e+08	2.34219e+08	1.98755e+08	1.70597e+08	1.9026e+08	20	20	20	20	20	20	18	20	20	20	20	20	19	19	19	19	19	19	17	19	19	19	19	19
O70570	18703	Pigr	FALSE	Polymeric immunoglobulin receptor OS=Mus musculus OX=10090 GN=Pigr PE=1 SV=1	47	26	284	26	131.475	773.35	26	84.9	5.98876e+07	6.49754e+07	7.69814e+07	7.69814e+07	4.80377e+07	4.12988e+07	4.46408e+07	5.7496e+07	5.92547e+07	8.49575e+07	5.51223e+07	3.98102e+07	7.5797e+07	22	22	21	22	18	22	24	24	25	21	23	24	22	22	21	22	18	22	24	24	25	21	23	24
O70305	20239	Atxn2	FALSE	Ataxin-2 OS=Mus musculus OX=10090 GN=Atxn2 PE=1 SV=1	22	22	284	20	109.466	717.71	22	136.4	1.38873e+07	2.691e+07	2.11186e+07	2.11186e+07	1.44632e+07	1.52048e+07	1.08053e+07	2.31173e+07	2.35643e+07	1.65757e+07	1.41443e+07	2.23463e+07	1.78765e+07	22	22	20	22	22	22	21	21	20	22	19	21	20	20	18	20	20	20	19	19	18	20	17	19
Q9D6R2	67834	Idh3a	TRUE	Isocitrate dehydrogenase [NAD] subunit alpha, mitochondrial OS=Mus musculus OX=10090 GN=Idh3a PE=1 SV=1	48	17	284	17	109.895	780.56	17	39.6	9.19726e+07	1.44313e+08	2.92956e+07	2.92956e+07	1.02466e+08	1.90034e+08	1.4671e+08	4.72849e+07	4.32772e+07	3.54601e+08	2.11716e+08	3.82241e+07	1.00261e+08	16	16	13	17	17	16	15	15	17	16	15	17	16	16	13	17	17	16	15	15	17	16	15	17
Q8BXA1	73124	Golim4	FALSE	Golgi integral membrane protein 4 OS=Mus musculus OX=10090 GN=Golim4 PE=1 SV=1	52	32	283	32	171.233	796.82	32	76.7	1.96048e+07	2.87725e+07	3.78692e+07	3.78692e+07	2.39229e+07	2.83568e+07	2.14588e+07	2.05995e+07	2.55578e+07	3.15743e+07	2.46599e+07	3.35867e+07	3.24952e+07	25	25	28	27	26	27	24	26	26	25	27	26	25	25	28	27	26	27	24	26	26	25	27	26
P01899	14964	H2-D1	FALSE	H-2 class I histocompatibility antigen, D-B alpha chain OS=Mus musculus OX=10090 GN=H2-D1 PE=1 SV=2	44	14	282	2	82.321	713.57	14	40.8	1.72125e+08	2.14243e+08	6.25142e+07	6.25142e+07	9.99287e+07	2.53554e+08	1.77458e+08	1.53529e+08	3.41719e+08	6.875e+07	2.64205e+08	1.85853e+08	2.82809e+08	13	14	13	10	13	14	14	14	13	14	13	14	2	2	2	0	2	2	2	2	2	2	2	2
Q3TIV5	69082	Zc3h15	FALSE	Zinc finger CCCH domain-containing protein 15 OS=Mus musculus OX=10090 GN=Zc3h15 PE=1 SV=2	52	20	281	20	116.035	818.33	20	48.3	3.25991e+07	4.61959e+07	5.84708e+07	5.84708e+07	2.74768e+07	3.47313e+07	2.29818e+07	4.28081e+07	4.7598e+07	4.56828e+07	3.59995e+07	4.22227e+07	3.6548e+07	20	19	18	18	18	18	19	20	19	20	20	19	20	19	18	18	18	18	19	20	19	20	20	19
P60710	11461	Actb	FALSE	Actin, cytoplasmic 1 OS=Mus musculus OX=10090 GN=Actb PE=1 SV=1	61	16	281	8	111.785	748.3	16	41.7	7.69293e+07	1.51679e+08	7.30711e+07	7.30711e+07	9.60503e+07	2.22146e+08	2.065e+08	6.19837e+07	7.68498e+07	2.96662e+08	1.50757e+08	7.37794e+07	1.01243e+08	15	15	15	15	15	15	15	15	16	15	14	14	7	7	7	7	7	7	7	7	8	7	6	6
Q61074	14208	Ppm1g	FALSE	Protein phosphatase 1G OS=Mus musculus OX=10090 GN=Ppm1g PE=1 SV=3	50	20	280	20	100.397	810.73	20	58.7	34710409	6.64303e+07	6.94773e+07	6.94773e+07	4.18663e+07	5.68923e+07	3.39228e+07	5.54568e+07	6.04218e+07	5.16725e+07	4.99735e+07	6.05745e+07	6.13909e+07	19	19	18	18	19	19	19	19	18	18	19	19	19	19	18	18	19	19	19	19	18	18	19	19
Q922F4	67951	Tubb6	FALSE	Tubulin beta-6 chain OS=Mus musculus OX=10090 GN=Tubb6 PE=1 SV=1	42	15	280	5	96.977	715.06	15	50.1	3.98534e+06	5.28096e+06	3.11026e+06	3.11026e+06	4.94197e+06	9.15198e+06	6.24197e+06	1.85959e+06	3.36057e+06	10326877	8.60228e+06	1.89574e+06	3.91902e+06	13	14	12	14	15	15	12	14	15	15	12	15	3	4	2	4	5	5	3	4	5	5	3	5
Q501J7	100169	Phactr4	FALSE	Phosphatase and actin regulator 4 OS=Mus musculus OX=10090 GN=Phactr4 PE=1 SV=2	51	27	277	27	120.843	821.58	27	76.6	1.60273e+07	2.81034e+07	3.54813e+07	3.54813e+07	2.14897e+07	2.75806e+07	1.72577e+07	2.44713e+07	2.6852e+07	2.3734e+07	2.23455e+07	2.80898e+07	2.57464e+07	26	26	25	27	23	26	26	27	27	27	27	26	26	26	25	27	23	26	26	27	27	27	27	26
Q6A068	71702	Cdc5l	FALSE	Cell division cycle 5-like protein OS=Mus musculus OX=10090 GN=Cdc5l PE=1 SV=2	46	26	277	26	129.827	781.21	26	92.1	1.77434e+07	2.9657e+07	1.94429e+07	1.94429e+07	1.54059e+07	2.56618e+07	1.36702e+07	2.53276e+07	1.97142e+07	1.66921e+07	1.97894e+07	2.51293e+07	1.99826e+07	24	23	23	25	24	22	24	25	22	24	25	25	24	23	23	25	24	22	24	25	22	24	25	25
P09528	14319	Fth1	TRUE	Ferritin heavy chain OS=Mus musculus OX=10090 GN=Fth1 PE=1 SV=2	75	14	275	14	102.424	768.75	14	21.1	6.37219e+07	1.30112e+08	1.47172e+08	1.47172e+08	2.7608e+08	2.17869e+08	2.35812e+08	1.03711e+08	1.07002e+08	1.50047e+08	1.86994e+08	1.8647e+08	3.01351e+08	13	13	12	14	14	14	12	14	14	13	12	14	13	13	12	14	14	14	12	14	14	13	12	14
P50518	11973	Atp6v1e1	FALSE	V-type proton ATPase subunit E 1 OS=Mus musculus OX=10090 GN=Atp6v1e1 PE=1 SV=2	70	17	275	17	107.964	772.99	17	26.1	4.94471e+07	8.18747e+07	7.31361e+07	7.31361e+07	5.01271e+07	7.83071e+07	5.29323e+07	6.11814e+07	6.52173e+07	82846439	8.44749e+07	8.34467e+07	8.47313e+07	15	16	16	15	16	16	16	15	15	16	16	16	15	16	16	15	16	16	16	15	15	16	16	16
Q91W90	105245	Txndc5	FALSE	Thioredoxin domain-containing protein 5 OS=Mus musculus OX=10090 GN=Txndc5 PE=1 SV=2	63	19	275	19	115.209	756.99	19	46.4	9.62342e+07	1.28896e+08	6.05746e+07	6.05746e+07	6.99406e+07	8.67425e+07	7.62797e+07	6.02245e+07	7.59018e+07	1.61209e+08	9.63278e+07	4.26447e+07	9.43266e+07	17	17	16	17	18	17	17	17	18	17	17	17	17	17	16	17	18	17	17	17	18	17	17	17
Q8K2Q9	71653	Shtn1	FALSE	Shootin-1 OS=Mus musculus OX=10090 GN=Shtn1 PE=1 SV=1	41	25	274	25	108.345	748.21	25	71.3	1.61775e+07	3.33607e+07	2.99553e+07	2.99553e+07	1.83808e+07	1.86611e+07	1.54251e+07	2.07707e+07	3.11719e+07	3.24439e+07	1.62119e+07	2.16065e+07	2.12273e+07	24	23	24	24	21	22	23	24	23	24	22	24	24	23	24	24	21	22	23	24	23	24	22	24
Q9CZX8	20085	Rps19	FALSE	40S ribosomal protein S19 OS=Mus musculus OX=10090 GN=Rps19 PE=1 SV=3	75	15	274	15	67.347	668.22	15	16.1	3.19581e+08	5.6537e+08	5.05547e+08	5.05547e+08	3.17034e+08	3.9491e+08	2.86838e+08	4.56175e+08	4.41296e+08	4.85517e+08	4.15974e+08	4.51772e+08	4.5282e+08	15	15	15	15	15	15	15	15	15	15	15	15	15	15	15	15	15	15	15	15	15	15	15	15
Q8CJF7	226747	Ahctf1	FALSE	Protein ELYS OS=Mus musculus OX=10090 GN=Ahctf1 PE=1 SV=1	20	32	273	32	144.604	801.35	32	247.5	1.04593e+07	2.09375e+07	1.9065e+07	1.9065e+07	1.24687e+07	1.85941e+07	1.08048e+07	1.80149e+07	1.52849e+07	1.05624e+07	1.26621e+07	2.31864e+07	1.77726e+07	25	27	26	27	26	27	29	28	24	26	30	30	25	27	26	27	26	27	29	28	24	26	30	30
Q9JKR6	12282	Hyou1	FALSE	Hypoxia up-regulated protein 1 OS=Mus musculus OX=10090 GN=Hyou1 PE=1 SV=1	42	29	273	29	173.829	785.79	29	111.1	3.49925e+07	4.61084e+07	5.32318e+07	5.32318e+07	3.72636e+07	4.54965e+07	3.34286e+07	3.56813e+07	4.42968e+07	4.83993e+07	3.33708e+07	4.29152e+07	4.03384e+07	28	27	25	28	28	28	23	26	27	28	22	28	28	27	25	28	28	28	23	26	27	28	22	28
Q922Y1	225896	Ubxn1	FALSE	UBX domain-containing protein 1 OS=Mus musculus OX=10090 GN=Ubxn1 PE=1 SV=1	75	18	271	18	107.931	813.19	18	33.6	6.00513e+07	95067143	5.81047e+07	5.81047e+07	5.63056e+07	6.46787e+07	5.04202e+07	7.01099e+07	5.52599e+07	8.4269e+07	6.80431e+07	7.39911e+07	7.15153e+07	17	15	15	16	16	16	16	17	17	16	16	17	17	15	15	16	16	16	16	17	17	16	16	17
Q8K5B2	193813	Mcfd2	FALSE	Multiple coagulation factor deficiency protein 2 homolog OS=Mus musculus OX=10090 GN=Mcfd2 PE=1 SV=1	69	6	271	6	104.275	1025.13	6	16.2	1.22914e+08	1.52969e+08	2.15779e+08	2.15779e+08	9.49279e+07	1.03848e+08	8.02667e+07	2.25405e+08	1.88338e+08	1.15223e+08	1.39048e+08	2.38322e+08	1.44659e+08	6	5	5	5	5	5	5	6	6	6	5	5	6	5	5	5	5	5	5	6	6	6	5	5
Q9CWK8	67804	Snx2	FALSE	Sorting nexin-2 OS=Mus musculus OX=10090 GN=Snx2 PE=1 SV=2	48	22	270	21	110.453	753.57	22	58.4	3.39446e+07	6.44998e+07	2.88931e+07	2.88931e+07	3.49613e+07	6.10262e+07	3.83085e+07	3.2218e+07	3.74914e+07	4.49484e+07	4.27001e+07	3.2712e+07	4.26932e+07	21	21	19	20	20	21	21	21	20	21	21	21	20	20	18	19	19	20	20	20	19	20	20	20
O09131	14873	Gsto1	FALSE	Glutathione S-transferase omega-1 OS=Mus musculus OX=10090 GN=Gsto1 PE=1 SV=2	72	19	269	19	92.443	693.71	19	27.5	5.24686e+07	1.14977e+08	5.05403e+07	5.05403e+07	1.03572e+08	1.82156e+08	1.40281e+08	3.68622e+07	3.65044e+07	1.49899e+08	1.57927e+08	5.7467e+07	1.27881e+08	19	18	17	18	18	18	17	18	18	19	19	19	19	18	17	18	18	18	17	18	18	19	19	19
P97461	20103	Rps5	FALSE	40S ribosomal protein S5 OS=Mus musculus OX=10090 GN=Rps5 PE=1 SV=3	61	11	268	11	73.181	757.46	11	22.9	6.16347e+07	8.46683e+07	5.10121e+07	5.10121e+07	4.55687e+07	7.24406e+07	5.25551e+07	5.43899e+07	5.32218e+07	9.80257e+07	7.19793e+07	4.28783e+07	6.1472e+07	11	10	11	10	11	11	11	11	10	11	11	11	11	10	11	10	11	11	11	11	10	11	11	11
Q9DBS5	74764	Klc4	FALSE	Kinesin light chain 4 OS=Mus musculus OX=10090 GN=Klc4 PE=1 SV=1	55	28	268	23	136.545	777.89	28	68.6	2.47495e+07	3.90932e+07	2.27052e+07	2.27052e+07	2.30327e+07	2.95641e+07	2.42835e+07	1.64218e+07	2.04131e+07	4.53731e+07	2.88506e+07	1.34278e+07	2.84644e+07	27	27	25	27	27	26	25	25	27	26	22	27	22	22	20	22	22	21	20	20	22	21	18	22
Q91Y97	230163	Aldob	FALSE	Fructose-bisphosphate aldolase B OS=Mus musculus OX=10090 GN=Aldob PE=1 SV=3	49	19	267	19	92.704	759.4	19	39.5	5.34672e+07	1.05147e+08	5.77964e+07	5.77964e+07	5.7071e+07	9.97875e+07	8.40835e+07	4.18124e+07	5.20382e+07	1.00537e+08	7.12408e+07	4.09857e+07	6.13755e+07	18	19	18	18	19	19	16	18	18	19	17	18	18	19	18	18	19	19	16	18	18	19	17	18
Q58A65	70834	Spag9	FALSE	C-Jun-amino-terminal kinase-interacting protein 4 OS=Mus musculus OX=10090 GN=Spag9 PE=1 SV=2	26	27	267	27	116.905	716.95	27	146.1	1.88709e+07	3.79155e+07	2.80638e+07	2.80638e+07	1.87397e+07	2.53678e+07	1.79894e+07	2.91226e+07	3.0071e+07	2.21358e+07	2.28656e+07	4.15907e+07	2.69067e+07	22	24	23	21	22	23	24	24	22	23	26	24	22	24	23	21	22	23	24	24	22	23	26	24
Q5F2E7	68564	Nufip2	FALSE	Nuclear fragile X mental retardation-interacting protein 2 OS=Mus musculus OX=10090 GN=Nufip2 PE=1 SV=1	46	22	266	22	116.825	725.45	22	75.6	1.45535e+07	2.78226e+07	2.50332e+07	2.50332e+07	1.70897e+07	1.73913e+07	1.11884e+07	2.16201e+07	2.56591e+07	2.17758e+07	1.61364e+07	2.37018e+07	20675779	22	22	21	22	21	20	22	22	21	22	22	22	22	22	21	22	21	20	22	22	21	22	22	22
Q9CZ44	386649	Nsfl1c	FALSE	NSFL1 cofactor p47 OS=Mus musculus OX=10090 GN=Nsfl1c PE=1 SV=1	63	19	266	19	94.485	710.34	19	40.7	5.59197e+07	1.02219e+08	6.17907e+07	6.17907e+07	6.63093e+07	8.63763e+07	5.92109e+07	5.90459e+07	6.37647e+07	8.39912e+07	7.33443e+07	6.81364e+07	7.17418e+07	19	19	19	19	19	19	19	19	19	19	19	19	19	19	19	19	19	19	19	19	19	19	19	19
Q06890	12759	Clu	FALSE	Clusterin OS=Mus musculus OX=10090 GN=Clu PE=1 SV=1	36	19	265	19	93.541	672	19	51.6	1.15112e+08	1.33087e+08	1.53061e+08	1.53061e+08	5.78444e+07	6.72643e+07	4.16276e+07	1.0782e+08	1.50814e+08	1.36549e+08	6.55926e+07	7.87713e+07	8.67656e+07	17	17	17	16	17	16	17	18	18	16	17	17	17	17	17	16	17	16	17	18	18	16	17	17
Q91Z58	224833	AI661453	FALSE	Uncharacterized protein C6orf132 homolog OS=Mus musculus OX=10090 PE=1 SV=2	34	30	265	30	124.618	729.74	30	127.8	1.41801e+07	2.50478e+07	2.95917e+07	2.95917e+07	1.43071e+07	1.67335e+07	1.12474e+07	2.25911e+07	2.26369e+07	1.78248e+07	1.29342e+07	2.36257e+07	1.76387e+07	27	28	27	28	26	27	28	29	25	23	28	26	27	28	27	28	26	27	28	29	25	23	28	26
Q99K41	100952	Emilin1	FALSE	EMILIN-1 OS=Mus musculus OX=10090 GN=Emilin1 PE=1 SV=1	28	21	264	21	99.128	802.76	21	107.5	1.71185e+07	2.61722e+07	1.76266e+07	1.76266e+07	1.9379e+07	3.30946e+07	2.48969e+07	1.84681e+07	1.97485e+07	3.22627e+07	2.70334e+07	2.67848e+07	2.88817e+07	20	20	19	20	20	21	20	20	21	21	21	21	20	20	19	20	20	21	20	20	21	21	21	21
P40630	21780	Tfam	TRUE	Transcription factor A, mitochondrial OS=Mus musculus OX=10090 GN=Tfam PE=1 SV=2	48	16	264	16	68.044	580.28	16	28	4.17844e+07	9.51302e+07	7.90966e+07	7.90966e+07	6.70425e+07	1.16157e+08	6.26922e+07	6.29246e+07	6.52505e+07	1.26316e+08	7.88153e+07	8.45821e+07	1.00222e+08	16	16	16	16	16	16	16	15	16	15	16	16	16	16	16	16	16	16	16	15	16	15	16	16
O08539	30948	Bin1	FALSE	Myc box-dependent-interacting protein 1 OS=Mus musculus OX=10090 GN=Bin1 PE=1 SV=1	47	20	264	18	122.691	725.24	20	64.4	2.3756e+07	4.00961e+07	5.20916e+07	5.20916e+07	3.02828e+07	3.64797e+07	2.82295e+07	3.84295e+07	4.69562e+07	3.91125e+07	3.75114e+07	5.61371e+07	4.76426e+07	18	19	18	20	19	19	20	20	19	19	20	20	16	17	16	18	17	17	18	18	17	17	18	18
Q61207	19156	Psap	FALSE	Prosaposin OS=Mus musculus OX=10090 GN=Psap PE=1 SV=2	34	16	263	16	93.976	733.35	16	61.4	1.88264e+08	4.07767e+08	2.93385e+08	2.93385e+08	2.79339e+08	3.33171e+08	1.61782e+08	2.86716e+08	5.56942e+08	3.41053e+08	2.86609e+08	5.20293e+08	3.45633e+08	12	13	12	13	12	13	13	16	15	14	16	14	12	13	12	13	12	13	13	16	15	14	16	14
Q9Z2X1	98758	Hnrnpf	FALSE	Heterogeneous nuclear ribonucleoprotein F OS=Mus musculus OX=10090 GN=Hnrnpf PE=1 SV=3	54	14	263	12	96.335	763.68	14	45.7	9.94148e+07	1.29281e+08	4.35056e+07	4.35056e+07	8.03233e+07	1.5091e+08	1.08234e+08	5.00642e+07	4.65292e+07	1.30229e+08	1.06528e+08	5.37481e+07	7.96339e+07	14	13	14	14	14	14	14	14	14	13	14	14	12	11	12	12	12	12	12	12	12	11	12	12
Q8K4L3	225115	Svil	FALSE	Supervillin OS=Mus musculus OX=10090 GN=Svil PE=1 SV=1	15	25	262	25	119.067	737.98	25	243	2.09768e+07	3.35211e+07	2.15695e+07	2.15695e+07	2.63325e+07	3.35727e+07	1.98812e+07	2.3134e+07	2.93105e+07	3.97025e+07	2.65601e+07	2.66232e+07	3.52714e+07	23	23	23	24	23	22	23	22	21	23	24	23	23	23	23	24	23	22	23	22	21	23	24	23
Q9CSN1	66354	Snw1	FALSE	SNW domain-containing protein 1 OS=Mus musculus OX=10090 GN=Snw1 PE=1 SV=3	53	22	262	22	133.799	740.4	22	61.4	2.67727e+07	4.82991e+07	4.80444e+07	4.80444e+07	3.15197e+07	4.46105e+07	2.87101e+07	3.45959e+07	3.95342e+07	3.87113e+07	3.62802e+07	4.25461e+07	4.54966e+07	21	21	22	20	22	20	20	22	22	21	20	22	21	21	22	20	22	20	20	22	22	21	20	22
Q8CI51	56376	Pdlim5	FALSE	PDZ and LIM domain protein 5 OS=Mus musculus OX=10090 GN=Pdlim5 PE=1 SV=4	37	15	261	15	106.647	812.09	15	63.3	2.56347e+07	5.29514e+07	3.08857e+07	3.08857e+07	3.6487e+07	4.55409e+07	3.38703e+07	3.61175e+07	3.72991e+07	3.15512e+07	4.02448e+07	4.5969e+07	4.5411e+07	14	15	15	13	14	15	14	14	12	13	13	13	14	15	15	13	14	15	14	14	12	13	13	13
Q8BG05	229279	Hnrnpa3	FALSE	Heterogeneous nuclear ribonucleoprotein A3 OS=Mus musculus OX=10090 GN=Hnrnpa3 PE=1 SV=1	41	18	259	17	101.075	750.78	18	39.6	7.03869e+07	9.61817e+07	5.61817e+07	5.61817e+07	8.3606e+07	1.28365e+08	1.07383e+08	5.47045e+07	7.12185e+07	1.47028e+08	1.17986e+08	5.53222e+07	7.92754e+07	17	18	17	18	18	18	15	18	18	18	16	18	16	17	16	17	17	17	14	17	17	17	15	17
Q9WVE8	23970	Pacsin2	FALSE	Protein kinase C and casein kinase substrate in neurons protein 2 OS=Mus musculus OX=10090 GN=Pacsin2 PE=1 SV=1	35	19	259	19	80.644	653.08	19	55.8	4.93241e+07	8.2329e+07	6.65874e+07	6.65874e+07	5.59035e+07	8.17152e+07	5.24728e+07	4.32911e+07	5.4745e+07	1.00072e+08	7.56762e+07	3.57146e+07	6.75084e+07	17	18	17	18	18	18	17	17	19	17	17	17	17	18	17	18	18	18	17	17	19	17	17	17
Q61233	18826	Lcp1	FALSE	Plastin-2 OS=Mus musculus OX=10090 GN=Lcp1 PE=1 SV=4	61	29	258	24	134.48	685.86	29	70.1	2.66502e+07	7.41145e+07	3.1984e+07	3.1984e+07	3.84186e+07	5.80116e+07	5.1376e+07	3.85778e+07	5.67211e+07	8.34155e+07	4.32329e+07	6.9772e+07	4.34801e+07	20	20	12	22	25	26	16	18	27	24	14	19	15	16	9	17	21	21	11	13	22	19	10	14
Q9CQH7	70533	Btf3l4	FALSE	Transcription factor BTF3 homolog 4 OS=Mus musculus OX=10090 GN=Btf3l4 PE=1 SV=1	77	12	257	11	79.708	873.3	12	17.3	1.10975e+08	2.00946e+08	1.88348e+08	1.88348e+08	1.07136e+08	1.24936e+08	9.44733e+07	1.68751e+08	1.84995e+08	1.50161e+08	1.29689e+08	1.7064e+08	1.51782e+08	11	12	12	12	11	12	12	11	11	12	12	12	11	11	11	11	11	11	11	11	11	11	11	11
P15532	18102	Nme1	FALSE	Nucleoside diphosphate kinase A OS=Mus musculus OX=10090 GN=Nme1 PE=1 SV=1	80	12	256	8	71.079	743.22	12	17.2	2.022e+08	3.45609e+08	1.68656e+08	1.68656e+08	2.29885e+08	3.0777e+08	3.00961e+08	1.6382e+08	1.74409e+08	5.04898e+08	2.80261e+08	1.00729e+08	2.4718e+08	12	12	12	12	12	12	11	12	12	12	11	12	8	8	8	8	8	8	7	8	8	8	7	8
P63242	276770	Eif5a	FALSE	Eukaryotic translation initiation factor 5A-1 OS=Mus musculus OX=10090 GN=Eif5a PE=1 SV=2	89	14	256	14	113.616	797.75	14	16.8	1.42336e+08	2.26054e+08	1.17915e+08	1.17915e+08	1.43205e+08	2.04451e+08	1.6443e+08	9.59856e+07	1.21181e+08	3.0401e+08	2.17569e+08	8.683e+07	1.57123e+08	14	13	13	14	14	14	13	14	14	14	13	14	14	13	13	14	14	14	13	14	14	14	13	14
Q8R1S4	211401	Mtss1	FALSE	Protein MTSS 1 OS=Mus musculus OX=10090 GN=Mtss1 PE=1 SV=1	40	22	256	22	102.823	731.48	22	82.4	2.88415e+07	3.52943e+07	3.95879e+07	3.95879e+07	3.01819e+07	3.85725e+07	3.0742e+07	2.57984e+07	2.53025e+07	4.80087e+07	3.68066e+07	3.49697e+07	3.90967e+07	20	18	19	20	20	19	19	19	21	20	19	19	20	18	19	20	20	19	19	19	21	20	19	19
Q99K30	98845	Eps8l2	FALSE	Epidermal growth factor receptor kinase substrate 8-like protein 2 OS=Mus musculus OX=10090 GN=Eps8l2 PE=1 SV=1	37	21	256	21	96.851	745.59	21	82.2	3.00529e+07	7.1567e+07	3.36516e+07	3.36516e+07	2.29362e+07	3.29891e+07	2.59858e+07	3.56447e+07	3.74069e+07	4.24649e+07	2.71546e+07	2.62887e+07	2.43744e+07	20	21	19	21	21	20	19	21	21	21	19	20	20	21	19	21	21	20	19	21	21	21	19	20
Q01853	269523	Vcp	FALSE	Transitional endoplasmic reticulum ATPase OS=Mus musculus OX=10090 GN=Vcp PE=1 SV=4	37	25	255	25	107.115	709.05	25	89.3	1.48861e+07	2.47881e+07	1.37955e+07	1.37955e+07	1.64424e+07	2.43692e+07	2.18331e+07	1.53742e+07	1.08581e+07	2.9154e+07	1.92308e+07	1.14023e+07	1.73731e+07	23	21	17	23	22	22	21	19	22	22	18	20	23	21	17	23	22	22	21	19	22	22	18	20
Q61176	11846	Arg1	FALSE	Arginase-1 OS=Mus musculus OX=10090 GN=Arg1 PE=1 SV=1	71	17	255	17	106.686	740.44	17	34.8	7.45907e+07	1.18483e+08	8.43597e+07	8.43597e+07	9.84373e+07	1.88243e+08	1.29686e+08	6.90451e+07	8.11558e+07	1.57007e+08	1.6133e+08	8.19128e+07	8.80782e+07	17	15	14	16	17	16	14	15	17	17	15	17	17	15	14	16	17	16	14	15	17	17	15	17
Q9D1Q6	76299	Erp44	FALSE	Endoplasmic reticulum resident protein 44 OS=Mus musculus OX=10090 GN=Erp44 PE=1 SV=1	60	20	255	20	133.905	749.2	20	46.8	8.2623e+07	1.139e+08	3.87466e+07	3.87466e+07	7.37797e+07	1.11669e+08	9.87832e+07	3.48721e+07	3.84782e+07	1.75162e+08	1.33167e+08	2.16886e+07	8.16776e+07	19	19	17	19	19	20	15	17	19	19	17	19	19	19	17	19	19	20	15	17	19	19	17	19
O35691	18949	Pnn	FALSE	Pinin OS=Mus musculus OX=10090 GN=Pnn PE=1 SV=4	37	24	255	24	88.753	607.12	24	82.4	2.74723e+07	4.12501e+07	3.56826e+07	3.56826e+07	2.60943e+07	4.48983e+07	2.23844e+07	2.98533e+07	2.95389e+07	4.12858e+07	3.13443e+07	3.03486e+07	2.62089e+07	21	20	21	20	21	20	21	21	21	21	23	20	21	20	21	20	21	20	21	21	21	21	23	20
Q9CRB9	66075	Chchd3	TRUE	MICOS complex subunit Mic19 OS=Mus musculus OX=10090 GN=Chchd3 PE=1 SV=1	61	16	253	16	73.604	682.26	16	26.3	1.39894e+08	2.51532e+08	1.69129e+08	1.69129e+08	1.30787e+08	1.91439e+08	1.34769e+08	1.64245e+08	1.74051e+08	3.76408e+08	2.17031e+08	1.94013e+08	1.94682e+08	14	14	15	14	15	14	14	15	15	15	15	14	14	14	15	14	15	14	14	15	15	15	15	14
Q9DBP5	66588	Cmpk1	FALSE	UMP-CMP kinase OS=Mus musculus OX=10090 GN=Cmpk1 PE=1 SV=1	65	13	252	13	84.078	667.67	13	22.2	1.01988e+08	1.62495e+08	6.8187e+07	6.8187e+07	9.00891e+07	1.54127e+08	1.22736e+08	5.92224e+07	6.8445e+07	2.32978e+08	1.46474e+08	5.19688e+07	1.07608e+08	13	13	12	13	13	13	11	12	13	13	12	13	13	13	12	13	13	13	11	12	13	13	12	13
P97449	16790	Anpep	FALSE	Aminopeptidase N OS=Mus musculus OX=10090 GN=Anpep PE=1 SV=4	38	30	252	30	156.635	725.52	30	109.6	3.09278e+07	3.54636e+07	1.22259e+07	1.22259e+07	4.1257e+07	6.63034e+07	5.34988e+07	1.01365e+07	1.07326e+07	6.9578e+07	4.93312e+07	7.03687e+06	2.86167e+07	28	25	17	27	29	29	18	20	28	28	16	26	28	25	17	27	29	29	18	20	28	28	16	26
P29699	11625	Ahsg	FALSE	Alpha-2-HS-glycoprotein OS=Mus musculus OX=10090 GN=Ahsg PE=1 SV=1	56	10	251	10	107.718	924.3	10	37.3	1.62069e+08	1.5837e+08	2.04565e+08	2.04565e+08	1.46954e+08	1.8509e+08	9.78647e+07	1.7428e+08	2.40566e+08	1.87282e+08	1.84698e+08	2.3994e+08	1.75758e+08	10	10	10	10	10	9	10	10	10	10	10	10	10	10	10	10	10	9	10	10	10	10	10	10
P67778	18673	Phb	TRUE	Prohibitin OS=Mus musculus OX=10090 GN=Phb PE=1 SV=1	79	16	250	16	80.73	805.04	16	29.8	7.60815e+07	1.07173e+08	3.48769e+07	3.48769e+07	6.68207e+07	1.42539e+08	1.22941e+08	3.26872e+07	3.30753e+07	2.93965e+08	1.3472e+08	2.48664e+07	6.47919e+07	15	15	14	15	16	16	15	16	16	16	15	16	15	15	14	15	16	16	15	16	16	16	15	16
P97372	19188	Psme2	FALSE	Proteasome activator complex subunit 2 OS=Mus musculus OX=10090 GN=Psme2 PE=1 SV=4	67	16	249	16	92.348	693.31	16	27	6.23772e+07	1.24799e+08	5.4677e+07	5.4677e+07	8.2312e+07	1.3754e+08	1.04774e+08	4.4551e+07	7.63673e+07	1.34429e+08	1.1872e+08	5.24281e+07	1.10474e+08	16	16	15	16	16	15	15	16	16	16	16	16	16	16	15	16	16	15	15	16	16	16	16	16
Q61733	57312	Mrps31	TRUE	28S ribosomal protein S31, mitochondrial OS=Mus musculus OX=10090 GN=Mrps31 PE=1 SV=1	52	19	249	18	106.279	717.73	19	43.9	3.72958e+07	5.66446e+07	6.44266e+07	6.44266e+07	2.91391e+07	4.40758e+07	2.60805e+07	6.91794e+07	6.42333e+07	8.61379e+07	4.93625e+07	6.77837e+07	4.61384e+07	18	18	18	19	18	19	18	19	18	18	19	19	17	17	17	18	17	18	17	18	17	17	18	18
P33622	11814	Apoc3	FALSE	Apolipoprotein C-III OS=Mus musculus OX=10090 GN=Apoc3 PE=1 SV=2	88	6	249	6	27.823	710.32	6	11	8.80882e+07	1.61686e+08	1.70843e+08	1.70843e+08	1.16537e+08	2.60215e+08	1.11253e+08	1.17504e+08	1.24985e+08	1.06832e+08	1.43438e+08	1.66388e+08	1.35561e+08	4	4	5	4	4	4	3	4	4	5	5	5	4	4	5	4	4	4	3	4	4	5	5	5
O54931	11641	Akap2	FALSE	A-kinase anchor protein 2 OS=Mus musculus OX=10090 GN=Akap2 PE=1 SV=3	37	23	249	23	139.176	688.39	23	98.5	1.85593e+07	3.19397e+07	3.6302e+07	3.6302e+07	22797614	2.83162e+07	1.8826e+07	3.23581e+07	3.53924e+07	2.61011e+07	2.75104e+07	4.05115e+07	3.34402e+07	20	19	19	19	18	20	21	20	17	21	20	22	20	19	19	19	18	20	21	20	17	21	20	22
Q9CR98	66488	Fam136a	TRUE	Protein FAM136A OS=Mus musculus OX=10090 GN=Fam136a PE=1 SV=1	81	13	248	13	72.181	544.89	13	15.7	1.08422e+08	2.04457e+08	1.73386e+08	1.73386e+08	1.20607e+08	1.57301e+08	1.02293e+08	1.87316e+08	1.99933e+08	2.48936e+08	1.66094e+08	2.73183e+08	1.76254e+08	12	11	12	12	11	11	11	12	13	11	13	11	12	11	12	12	11	11	11	12	13	11	13	11
Q9QXT0	56530	Cnpy2	FALSE	Protein canopy homolog 2 OS=Mus musculus OX=10090 GN=Cnpy2 PE=1 SV=1	60	12	248	12	74.44	634.1	12	20.8	1.26414e+08	2.05681e+08	1.85578e+08	1.85578e+08	1.24917e+08	1.55055e+08	1.16901e+08	1.52424e+08	1.85645e+08	1.96612e+08	1.54082e+08	2.18176e+08	1.79444e+08	12	12	12	12	12	12	12	12	12	12	12	12	12	12	12	12	12	12	12	12	12	12	12	12
P19536	12859	Cox5b	TRUE	Cytochrome c oxidase subunit 5B, mitochondrial OS=Mus musculus OX=10090 GN=Cox5b PE=1 SV=1	59	8	248	8	43.333	563.71	8	13.8	1.31208e+08	2.0428e+08	1.1234e+08	1.1234e+08	1.21102e+08	2.41208e+08	1.4683e+08	1.60794e+08	1.53405e+08	4.03968e+08	2.15476e+08	1.21109e+08	1.42245e+08	8	7	7	8	8	8	7	8	8	8	7	8	8	7	7	8	8	8	7	8	8	8	7	8
Q8VBW8	192653	Ttc36	FALSE	Tetratricopeptide repeat protein 36 OS=Mus musculus OX=10090 GN=Ttc36 PE=1 SV=1	44	8	247	8	54.613	624.35	8	20.1	2.55852e+08	4.72325e+08	5.05408e+08	5.05408e+08	3.54266e+08	4.20439e+08	3.28834e+08	3.25681e+08	3.40281e+08	3.79115e+08	3.88266e+08	4.48899e+08	4.15565e+08	8	8	8	8	8	8	8	8	8	8	8	8	8	8	8	8	8	8	8	8	8	8	8	8
Q9ER00	100226	Stx12	FALSE	Syntaxin-12 OS=Mus musculus OX=10090 GN=Stx12 PE=1 SV=1	71	13	247	13	80.376	701.41	13	31.2	3.40283e+07	5.17767e+07	5.14615e+07	5.14615e+07	3.92684e+07	5.11841e+07	2.98132e+07	4.15882e+07	4.90612e+07	4.4747e+07	4.76627e+07	5.19841e+07	4.93915e+07	12	12	12	12	12	12	13	13	12	13	13	12	12	12	12	12	12	12	13	13	12	13	13	12
P30999	12388	Ctnnd1	FALSE	Catenin delta-1 OS=Mus musculus OX=10090 GN=Ctnnd1 PE=1 SV=2	41	26	246	26	133.181	665.91	26	104.9	2.2517e+07	5.27894e+07	3.58277e+07	3.58277e+07	2.87337e+07	4.28958e+07	3.19088e+07	2.89308e+07	3.37805e+07	4.10415e+07	2.85069e+07	2.90278e+07	3.15722e+07	23	23	22	24	24	24	23	24	22	23	21	23	23	23	22	24	24	24	23	24	22	23	21	23
Q921T2	208263	Tor1aip1	FALSE	Torsin-1A-interacting protein 1 OS=Mus musculus OX=10090 GN=Tor1aip1 PE=1 SV=3	47	22	246	22	110.821	688.32	22	66.7	3.82129e+07	6.92108e+07	4.17119e+07	4.17119e+07	3.86718e+07	6.97733e+07	3.82964e+07	4.04742e+07	4.92821e+07	5.4929e+07	5.19114e+07	3.92651e+07	5.792e+07	20	20	20	20	22	20	21	20	21	20	21	21	20	20	20	20	22	20	21	20	21	20	21	21
Q8CHG3	70297	Gcc2	FALSE	GRIP and coiled-coil domain-containing protein 2 OS=Mus musculus OX=10090 GN=Gcc2 PE=1 SV=2	26	37	245	37	134.871	617.94	37	194.3	1.22173e+07	1.98317e+07	1.40938e+07	1.40938e+07	1.2632e+07	1.53164e+07	1.14818e+07	9.37683e+06	1.31861e+07	1.70906e+07	1.26989e+07	8.80903e+06	1.43461e+07	35	33	28	33	30	33	31	30	31	31	25	31	35	33	28	33	30	33	31	30	31	31	25	31
P07759	20714	Serpina3k	FALSE	Serine protease inhibitor A3K OS=Mus musculus OX=10090 GN=Serpina3k PE=1 SV=2	36	13	245	7	72.381	711.73	13	46.9	6.14791e+07	8.70113e+07	9.56911e+07	9.56911e+07	4.11222e+07	5.79371e+07	2.97794e+07	6.91634e+07	6.51572e+07	5.97287e+07	4.657e+07	6.43442e+07	5.12324e+07	13	13	12	11	13	11	12	13	12	12	13	12	7	7	6	6	7	6	6	7	6	6	7	6
P62073	30059	Timm10	TRUE	Mitochondrial import inner membrane translocase subunit Tim10 OS=Mus musculus OX=10090 GN=Timm10 PE=1 SV=1	62	8	245	8	93.72	744.62	8	10.3	3.38516e+07	6.61103e+07	5.14378e+07	5.14378e+07	2.84898e+07	4.21651e+07	2.77917e+07	6.9861e+07	6.83905e+07	8.66604e+07	4.18995e+07	7.54561e+07	5.12785e+07	7	7	8	7	7	7	7	7	7	7	7	7	7	7	8	7	7	7	7	7	7	7	7	7
O88685	19182	Psmc3	FALSE	26S proteasome regulatory subunit 6A OS=Mus musculus OX=10090 GN=Psmc3 PE=1 SV=2	67	22	245	22	137.511	740.66	22	49.5	3.79146e+07	4.61613e+07	1.98009e+07	1.98009e+07	3.38141e+07	5.15142e+07	4.28476e+07	1.29599e+07	1.23056e+07	7.4126e+07	5.13566e+07	1.20847e+07	3.62949e+07	20	18	17	21	21	21	19	19	22	21	19	20	20	18	17	21	21	21	19	19	22	21	19	20
Q9QX47	20658	Son	FALSE	Protein SON OS=Mus musculus OX=10090 GN=Son PE=1 SV=2	19	28	245	28	115.497	680.62	28	265.5	1.58505e+07	3.09414e+07	2.98814e+07	2.98814e+07	1.47784e+07	2.5138e+07	8.60983e+06	2.65309e+07	2.48733e+07	1.21262e+07	1.33817e+07	3.04366e+07	1.82701e+07	23	25	25	21	25	20	26	25	20	19	26	21	23	25	25	21	25	20	26	25	20	19	26	21
P34927	11889	Asgr1	FALSE	Asialoglycoprotein receptor 1 OS=Mus musculus OX=10090 GN=Asgr1 PE=1 SV=4	61	14	245	14	76.133	619.61	14	32.6	2.98347e+08	3.78999e+08	4.37237e+08	4.37237e+08	2.85211e+08	4.11003e+08	2.54226e+08	2.84448e+08	3.26247e+08	4.10412e+08	4.24314e+08	2.71116e+08	3.6938e+08	13	13	13	13	13	13	13	12	13	14	13	13	13	13	13	13	13	13	13	12	13	14	13	13
Q91XC8	223453	Dap	FALSE	Death-associated protein 1 OS=Mus musculus OX=10090 GN=Dap PE=1 SV=3	66	4	244	4	45.221	481	4	11.1	8.94319e+06	2.86824e+07	3.89391e+07	3.89391e+07	2.32362e+07	3.70933e+07	1.96245e+07	2.49019e+07	3.83953e+07	3.04881e+07	2.32913e+07	3.86461e+07	3.71795e+07	4	4	4	4	4	4	4	4	4	4	4	4	4	4	4	4	4	4	4	4	4	4	4	4
P49710	15163	Hcls1	FALSE	Hematopoietic lineage cell-specific protein OS=Mus musculus OX=10090 GN=Hcls1 PE=1 SV=2	45	18	243	18	89.212	613.87	18	54.2	1.47008e+07	2.98486e+07	3.0458e+07	3.0458e+07	2.19355e+07	3.12376e+07	1.88077e+07	2.11789e+07	5.80548e+07	1.72787e+07	2.2379e+07	3.89273e+07	4.5849e+07	15	15	15	15	16	13	16	18	12	15	17	18	15	15	15	15	16	13	16	18	12	15	17	18
P18760	12631	Cfl1	FALSE	Cofilin-1 OS=Mus musculus OX=10090 GN=Cfl1 PE=1 SV=3	81	19	243	17	75.952	742.27	19	18.5	7.46468e+07	1.35937e+08	6.01371e+07	6.01371e+07	8.84956e+07	1.7244e+08	1.26489e+08	4.86444e+07	6.35063e+07	2.03736e+08	1.39031e+08	4.21838e+07	9.02287e+07	17	17	16	19	19	19	17	18	19	18	16	17	15	15	14	17	17	17	15	16	17	16	14	15
P43274	50709	H1f4	FALSE	Histone H1.4 OS=Mus musculus OX=10090 GN=H1-4 PE=1 SV=2	39	12	241	3	56.439	626.5	12	22	1.1916e+08	2.50061e+08	211270906	211270906	1.57633e+08	2.10832e+08	1.62409e+08	1.375e+08	1.17606e+08	2.60204e+08	169512615	1.40982e+08	1.43607e+08	11	11	11	10	10	11	10	9	10	10	10	10	3	3	3	3	3	3	3	3	3	3	3	3
Q7TQH0	233871	Atxn2l	FALSE	Ataxin-2-like protein OS=Mus musculus OX=10090 GN=Atxn2l PE=1 SV=1	24	23	241	21	98.577	621.76	23	110.6	2.22429e+07	4.67243e+07	3.78966e+07	3.78966e+07	2.39047e+07	2.76693e+07	1.8469e+07	3.22838e+07	3.5803e+07	3.23152e+07	2.44533e+07	3.64868e+07	3.05882e+07	22	21	21	21	20	21	21	22	21	21	21	21	20	19	19	19	18	19	19	20	19	19	19	19
P61458	13180	Pcbd1	FALSE	Pterin-4-alpha-carbinolamine dehydratase OS=Mus musculus OX=10090 GN=Pcbd1 PE=1 SV=2	93	10	241	10	52.364	514.93	10	12	4.65379e+08	6.8369e+08	3.04902e+08	3.04902e+08	5.89627e+08	7.22172e+08	5.97057e+08	3.01217e+08	4.77581e+08	8.01118e+08	7.38713e+08	3.48108e+08	7.10108e+08	10	10	10	9	10	10	10	9	10	10	9	9	10	10	10	9	10	10	10	9	10	10	9	9
Q9WTQ5	83397	Akap12	FALSE	A-kinase anchor protein 12 OS=Mus musculus OX=10090 GN=Akap12 PE=1 SV=1	43	41	241	41	196.375	687.02	41	180.6	5.67629e+06	8.56242e+06	1.7652e+07	1.7652e+07	1.2067e+07	9.84207e+06	6.10361e+06	1.3909e+07	1.56524e+07	8.44387e+06	6.9467e+06	1.76076e+07	1.33483e+07	27	24	32	34	30	26	35	36	24	24	36	34	27	24	32	34	30	26	35	36	24	24	36	34
Q9QXY6	57440	Ehd3	FALSE	EH domain-containing protein 3 OS=Mus musculus OX=10090 GN=Ehd3 PE=1 SV=2	37	16	240	14	99.752	767.47	16	60.8	2.05629e+07	5.17698e+07	5.54268e+07	5.54268e+07	3.87122e+07	5.52062e+07	2.74655e+07	3.82631e+07	4.01235e+07	4.14224e+07	3.70157e+07	7.23655e+07	4.29478e+07	11	14	14	14	14	15	14	14	13	14	15	12	9	12	12	12	12	13	12	12	11	12	13	10
P28656	53605	Nap1l1	FALSE	Nucleosome assembly protein 1-like 1 OS=Mus musculus OX=10090 GN=Nap1l1 PE=1 SV=2	50	16	239	15	108.908	704.09	16	45.3	6.4173e+07	8.1856e+07	9.0473e+07	9.0473e+07	5.43981e+07	6.00374e+07	4.82457e+07	6.38391e+07	7.86985e+07	9.92884e+07	6.74966e+07	7.00224e+07	7.64451e+07	13	13	14	13	12	13	15	14	13	12	14	14	12	12	13	12	11	12	14	13	12	11	13	13
P19157	14870	Gstp1	FALSE	Glutathione S-transferase P 1 OS=Mus musculus OX=10090 GN=Gstp1 PE=1 SV=2	67	10	239	10	73.115	736.72	10	23.6	3.17259e+08	3.65518e+08	1.98361e+08	1.98361e+08	5.03361e+07	8.45057e+07	6.82875e+07	1.48397e+08	2.01793e+08	8.59027e+08	6.65602e+07	8.7032e+06	3.90225e+07	9	9	7	7	7	7	7	7	10	7	5	7	9	9	7	7	7	7	7	7	10	7	5	7
Q9CY50	107513	Ssr1	FALSE	Translocon-associated protein subunit alpha OS=Mus musculus OX=10090 GN=Ssr1 PE=1 SV=1	31	6	239	6	46.972	668.35	6	32	2.12092e+08	3.12894e+08	3.04698e+08	3.04698e+08	1.84619e+08	2.46423e+08	1.42819e+08	2.5379e+08	2.83661e+08	2.40059e+08	2.31792e+08	2.48246e+08	2.39837e+08	5	5	6	6	5	5	6	6	5	6	5	6	5	5	6	6	5	5	6	6	5	6	5	6
P56959	233908	Fus	FALSE	RNA-binding protein FUS OS=Mus musculus OX=10090 GN=Fus PE=1 SV=1	27	13	238	13	107.578	642.21	13	52.6	9.9687e+07	1.7737e+08	1.78935e+08	1.78935e+08	1.15684e+08	1.58878e+08	1.03598e+08	1.40576e+08	1.68561e+08	1.33924e+08	1.37592e+08	1.75954e+08	1.54808e+08	12	12	12	11	11	11	12	13	13	12	13	11	12	12	12	11	11	11	12	13	13	12	13	11
Q99LC5	110842	Etfa	TRUE	Electron transfer flavoprotein subunit alpha, mitochondrial OS=Mus musculus OX=10090 GN=Etfa PE=1 SV=2	60	14	237	14	83.174	802.16	14	35	3.01436e+07	4.15997e+07	2.03173e+07	2.03173e+07	3.791e+07	9.18882e+07	6.64296e+07	1.59793e+07	1.78612e+07	1.3749e+08	7.41686e+07	1.81722e+07	2.91457e+07	14	14	13	14	14	14	12	14	14	14	13	14	14	14	13	14	14	14	12	14	14	14	13	14
Q9D8U8	69178	Snx5	FALSE	Sorting nexin-5 OS=Mus musculus OX=10090 GN=Snx5 PE=1 SV=1	68	22	237	21	106.846	616.4	22	46.8	3.56453e+07	6.35948e+07	2.31902e+07	2.31902e+07	3.35411e+07	5.84479e+07	3.77032e+07	3.17792e+07	3.09819e+07	4.32981e+07	3.96589e+07	3.92426e+07	4.12609e+07	20	21	19	20	21	20	20	22	21	21	22	20	19	20	18	19	20	19	19	21	20	20	21	19
P08003	12304	Pdia4	FALSE	Protein disulfide-isomerase A4 OS=Mus musculus OX=10090 GN=Pdia4 PE=1 SV=3	42	27	235	27	100.193	555.37	27	71.9	2.28023e+07	2.47075e+07	1.78155e+07	1.78155e+07	2.19226e+07	3.20202e+07	2.62214e+07	1.41125e+07	1.38215e+07	3.09055e+07	2.8685e+07	1.7833e+07	1.9526e+07	24	24	21	25	24	24	23	21	24	24	23	24	24	24	21	25	24	24	23	21	24	24	23	24
Q3UTJ2	234214	Sorbs2	FALSE	Sorbin and SH3 domain-containing protein 2 OS=Mus musculus OX=10090 GN=Sorbs2 PE=1 SV=2	26	23	234	23	93.906	629.64	23	132.3	1.77112e+07	4.08172e+07	2.06625e+07	2.06625e+07	1.58226e+07	2.68017e+07	1.7706e+07	2.1693e+07	1.76087e+07	2.3253e+07	1.91817e+07	1.72894e+07	1.63674e+07	21	22	21	21	21	22	20	20	21	23	18	20	21	22	21	21	21	22	20	20	21	23	18	20
Q8K4Z5	67465	Sf3a1	FALSE	Splicing factor 3A subunit 1 OS=Mus musculus OX=10090 GN=Sf3a1 PE=1 SV=1	34	23	233	23	110.503	682.94	23	88.5	2.19123e+07	3.82236e+07	2.73886e+07	2.73886e+07	2.0702e+07	4.42242e+07	1.90179e+07	2.79591e+07	2.90687e+07	2.04255e+07	2.60544e+07	3.6058e+07	2.87185e+07	23	23	22	23	23	22	23	22	20	22	23	23	23	23	22	23	23	22	23	22	20	22	23	23
P70296	23980	Pebp1	FALSE	Phosphatidylethanolamine-binding protein 1 OS=Mus musculus OX=10090 GN=Pebp1 PE=1 SV=3	90	12	233	12	77.259	727.01	12	20.8	2.93688e+08	3.58689e+08	215956039	215956039	2.65706e+08	3.32384e+08	2.17275e+08	2.01548e+08	2.56638e+08	4.48981e+08	3.11549e+08	1.77727e+08	3.05725e+08	12	12	12	11	12	12	12	12	12	12	12	12	12	12	12	11	12	12	12	12	12	12	12	12
P01897	14964	H2-D1	FALSE	H-2 class I histocompatibility antigen, L-D alpha chain OS=Mus musculus OX=10090 GN=H2-L PE=1 SV=2	39	12	233	2	83.488	569.98	12	40.7	1.77187e+07	2.08843e+07			1.77846e+07	2.84575e+07	1.66949e+07	8872379	3.33017e+07	291118	2.24945e+07	1.4951e+07	2.89931e+07	10	12	8	10	11	12	11	11	9	12	10	11	2	2	0	2	2	2	2	2	0	2	2	2
Q9WV55	30960	Vapa	FALSE	Vesicle-associated membrane protein-associated protein A OS=Mus musculus OX=10090 GN=Vapa PE=1 SV=2	59	14	233	13	103.492	616.15	14	27.8	7.85932e+07	1.30549e+08	5.54499e+07	5.54499e+07	9.88392e+07	1.20531e+08	1.01332e+08	5.16368e+07	5.91663e+07	1.63118e+08	1.24905e+08	4.96225e+07	9.0908e+07	14	14	13	14	14	14	14	12	14	14	14	14	13	13	12	13	13	13	13	11	13	13	13	13
P70194	51811	Clec4f	FALSE	C-type lectin domain family 4 member F OS=Mus musculus OX=10090 GN=Clec4f PE=1 SV=1	34	17	232	17	77.669	581.59	17	61.2	2.34915e+07	3.61821e+07	2.95657e+07	2.95657e+07	2.80372e+07	3.52703e+07	2.11128e+07	1.95533e+07	4.18916e+07	2.78119e+07	2.38036e+07	2.94964e+07	4.58223e+07	16	16	16	15	16	16	16	15	16	15	16	16	16	16	16	15	16	16	16	15	16	15	16	16
P60335	23983	Pcbp1	FALSE	Poly(rC)-binding protein 1 OS=Mus musculus OX=10090 GN=Pcbp1 PE=1 SV=1	76	17	232	12	94.345	695.99	17	37.5	4.71175e+07	1.07857e+08	1.99567e+07	1.99567e+07	4.78898e+07	7.75261e+07	7.16832e+07	3.39916e+07	3.60999e+07	7.68403e+07	6.86667e+07	3.77234e+07	4.81453e+07	17	17	12	16	17	16	17	17	16	16	16	16	12	12	7	11	12	11	12	12	11	11	11	11
Q91WK0	71268	Lrrfip2	FALSE	Leucine-rich repeat flightless-interacting protein 2 OS=Mus musculus OX=10090 GN=Lrrfip2 PE=1 SV=1	53	22	232	21	117.124	705.92	22	47.1	2.45491e+07	4.98228e+07	5.85444e+07	5.85444e+07	3.08798e+07	3.57427e+07	2.60695e+07	4.50507e+07	4.80399e+07	3.44621e+07	3.74686e+07	5.37238e+07	4.27673e+07	17	18	18	16	17	16	18	17	16	17	20	17	16	17	17	15	16	15	17	16	15	16	19	16
Q9D8Y0	27984	Efhd2	FALSE	EF-hand domain-containing protein D2 OS=Mus musculus OX=10090 GN=Efhd2 PE=1 SV=1	67	13	231	13	66.561	607.58	13	26.8	4.94435e+07	9.00582e+07	7.75456e+07	7.75456e+07	7.51533e+07	9.78145e+07	75812933	6.12797e+07	8.00164e+07	8.71486e+07	8.87911e+07	9.41188e+07	1.04318e+08	12	12	12	12	12	12	12	13	12	12	12	12	12	12	12	12	12	12	12	13	12	12	12	12
Q78JT3	107766	Haao	FALSE	3-hydroxyanthranilate 3,4-dioxygenase OS=Mus musculus OX=10090 GN=Haao PE=1 SV=1	79	18	231	18	80.734	610.9	18	32.8	3.52087e+07	3.79512e+07	1.27585e+07	1.27585e+07	4.29564e+07	9.9625e+07	7.78949e+07	1.08734e+07	1.2556e+07	1.10198e+08	7.8705e+07	9.24113e+06	3.02068e+07	17	15	14	17	17	18	15	12	17	18	13	17	17	15	14	17	17	18	15	12	17	18	13	17
Q80WW9	77006	Ddrgk1	FALSE	DDRGK domain-containing protein 1 OS=Mus musculus OX=10090 GN=Ddrgk1 PE=1 SV=2	58	15	230	15	75.541	640.43	15	36	4.29956e+07	5.89527e+07	6.71809e+07	6.71809e+07	3.4625e+07	3.63326e+07	2.75943e+07	5.62407e+07	6.17137e+07	5.49548e+07	4.74124e+07	6.20735e+07	5.20373e+07	13	13	13	14	13	14	15	15	14	14	13	15	13	13	13	14	13	14	15	15	14	14	13	15
P04223	14972	H2-K1	FALSE	H-2 class I histocompatibility antigen, K-K alpha chain OS=Mus musculus OX=10090 GN=H2-K1 PE=1 SV=1	44	13	230	5	70.329	613.83	13	41.6	4.48838e+06	5.36089e+06	2.22311e+07	2.22311e+07	2.22472e+07	4938297	2983357	3.35805e+06	8.4355e+06	4.62585e+07	4.96366e+06	2.71853e+06	5.92065e+06	10	10	12	13	10	10	10	10	13	10	10	10	3	3	4	5	3	3	3	3	5	3	3	3
Q8BIQ5	108062	Cstf2	FALSE	Cleavage stimulation factor subunit 2 OS=Mus musculus OX=10090 GN=Cstf2 PE=1 SV=2	39	16	230	8	97.143	663.45	16	61.3	2.5301e+07	3.53813e+07	3.97397e+07	3.97397e+07	2.60253e+07	3.76387e+07	1.96999e+07	3.12397e+07	3.56029e+07	2.9567e+07	2.84693e+07	3.1096e+07	3.23779e+07	14	15	15	16	14	14	15	14	15	14	16	15	8	8	8	8	8	8	8	8	8	8	8	8
Q9JKB3	56449	Ybx3	FALSE	Y-box-binding protein 3 OS=Mus musculus OX=10090 GN=Ybx3 PE=1 SV=2	50	11	228	7	67.377	686.12	11	38.8	5.21463e+06	8.87483e+06	9.93617e+06	9.93617e+06	8.64084e+06	6.59244e+06	5.43291e+06	9.18525e+06	8.347e+06	7.23893e+06	7.62253e+06	11645363	1.02296e+07	10	10	10	10	9	11	10	10	10	10	10	10	6	6	6	6	5	7	6	6	6	6	6	6
O08677	16644	Kng1	FALSE	Kininogen-1 OS=Mus musculus OX=10090 GN=Kng1 PE=1 SV=1	32	19	228	19	85.469	593.62	19	73.1	7.52028e+07	8.27013e+07	9.27375e+07	9.27375e+07	6.4075e+07	1.05324e+08	6.80948e+07	4.56617e+07	6.79317e+07	8.96835e+07	7.96496e+07	5.3915e+07	8.41558e+07	18	17	17	18	18	18	17	18	19	18	18	18	18	17	17	18	18	18	17	18	19	18	18	18
Q9DB15	56282	Mrpl12	TRUE	39S ribosomal protein L12, mitochondrial OS=Mus musculus OX=10090 GN=Mrpl12 PE=1 SV=2	53	9	228	9	66.53	726.1	9	21.7	1.18664e+08	2.23083e+08	2.41763e+08	2.41763e+08	1.00027e+08	1.4104e+08	7.95564e+07	2.49564e+08	2.12478e+08	2.55725e+08	1.62168e+08	2.7225e+08	1.74335e+08	9	9	9	8	9	9	9	9	9	9	9	9	9	9	9	8	9	9	9	9	9	9	9	9
E9Q5C9	70769	Nolc1	FALSE	Nucleolar and coiled-body phosphoprotein 1 OS=Mus musculus OX=10090 GN=Nolc1 PE=1 SV=1	23	16	227	16	67.315	604.27	16	73.7	2.53976e+07	5.67144e+07	4.10722e+07	4.10722e+07	1.95212e+07	3.59028e+07	2.04705e+07	3.38813e+07	3.50185e+07	4.43298e+07	2.79677e+07	2.28265e+07	1.68329e+07	15	16	16	15	16	16	16	16	15	16	16	15	15	16	16	15	16	16	16	16	15	16	16	15
Q78ZA7	17955	Nap1l4	FALSE	Nucleosome assembly protein 1-like 4 OS=Mus musculus OX=10090 GN=Nap1l4 PE=1 SV=1	66	16	227	15	103.798	760.58	16	42.7	4.69827e+07	6.14505e+07	6.93944e+07	6.93944e+07	4.42871e+07	5.12633e+07	40358006	4.81729e+07	5.86989e+07	6.05646e+07	6.10493e+07	5.78636e+07	6.28843e+07	15	15	15	15	15	15	13	15	16	15	15	15	14	14	14	14	14	14	12	14	15	14	14	14
P48428	21371	Tbca	FALSE	Tubulin-specific chaperone A OS=Mus musculus OX=10090 GN=Tbca PE=1 SV=3	62	13	227	13	85.603	723.12	13	12.8	4.84229e+07	7.28218e+07	7.07916e+07	7.07916e+07	3.91015e+07	4.70537e+07	3.65959e+07	6.54425e+07	6.95739e+07	6.43902e+07	5.86361e+07	7.07077e+07	6.45537e+07	13	13	12	12	12	12	13	12	12	12	12	13	13	13	12	12	12	12	13	12	12	12	12	13
Q99NB9	81898	Sf3b1	FALSE	Splicing factor 3B subunit 1 OS=Mus musculus OX=10090 GN=Sf3b1 PE=1 SV=1	24	23	226	23	138.992	681.07	23	145.7	1.06973e+07	3.6061e+07	1.53139e+07	1.53139e+07	1.47646e+07	2.70052e+07	1.28867e+07	2.83407e+07	2.48973e+07	8.04853e+06	1.54456e+07	3.31381e+07	2.00012e+07	21	22	19	20	21	18	23	23	13	20	23	21	21	22	19	20	21	18	23	23	13	20	23	21
O35490	12116	Bhmt	FALSE	Betaine--homocysteine S-methyltransferase 1 OS=Mus musculus OX=10090 GN=Bhmt PE=1 SV=1	38	14	225	12	70.941	637.71	14	45	8.84298e+07	2.52116e+08	1.36051e+08	1.36051e+08	7.38857e+07	1.52889e+08	1.12186e+08	1.23305e+08	1.18238e+08	1.60139e+08	1.15295e+08	9.54952e+07	9.47032e+07	14	14	14	13	14	14	13	14	14	14	14	14	12	12	12	11	12	12	11	12	12	12	12	12
Q8BKI2	213988	Tnrc6b	FALSE	Trinucleotide repeat-containing gene 6B protein OS=Mus musculus OX=10090 GN=Tnrc6b PE=1 SV=2	23	30	225	30	143.284	590.44	30	191.8	5.8532e+06	9.39583e+06	7.74329e+06	7.74329e+06	5.62076e+06	8.50357e+06	9.42841e+06	9.18629e+06	1.05635e+07	8.70626e+06	8.22179e+06	9.77177e+06	9.27968e+06	22	23	21	18	19	21	23	25	19	20	29	23	22	23	21	18	19	21	23	25	19	20	29	23
Q05D44	226982	Eif5b	FALSE	Eukaryotic translation initiation factor 5B OS=Mus musculus OX=10090 GN=Eif5b PE=1 SV=2	15	23	225	22	122.363	677.37	23	137.5	1.26822e+07	3.27682e+07	2.91501e+07	2.91501e+07	1.69542e+07	2.71666e+07	1.43813e+07	2.89155e+07	3.15206e+07	1.54294e+07	1.8629e+07	3.27979e+07	2.3296e+07	18	20	20	20	20	19	22	21	19	20	21	20	17	19	19	19	19	18	21	20	18	19	20	19
Q9CQV8	54401	Ywhab	FALSE	14-3-3 protein beta/alpha OS=Mus musculus OX=10090 GN=Ywhab PE=1 SV=3	68	17	225	7	84.039	604.9	17	28.1	1.09304e+07	1.55601e+07	5.40637e+06	5.40637e+06	1.10181e+07	2.20436e+07	1.7177e+07	3.95635e+06	5.19436e+06	2.56915e+07	19481462	3.50701e+06	1.04524e+07	14	14	12	13	17	17	12	13	16	17	13	14	5	5	4	5	7	7	4	5	7	7	5	6
Q9CQA3	67680	Sdhb	TRUE	Succinate dehydrogenase [ubiquinone] iron-sulfur subunit, mitochondrial OS=Mus musculus OX=10090 GN=Sdhb PE=1 SV=1	46	15	224	15	71.799	519.36	15	31.8	1.05083e+08	1.75665e+08	6.86469e+07	6.86469e+07	9.32567e+07	1.48181e+08	1.55234e+08	7.08341e+07	6.8046e+07	4.54052e+08	1.78492e+08	6.94128e+07	1.13548e+08	15	15	15	15	15	15	15	15	15	15	15	15	15	15	15	15	15	15	15	15	15	15	15	15
Q8BKX1	108100	Baiap2	FALSE	Brain-specific angiogenesis inhibitor 1-associated protein 2 OS=Mus musculus OX=10090 GN=Baiap2 PE=1 SV=2	51	22	224	22	92.08	551.98	22	59.2	15988327	3.73925e+07	1.73348e+07	1.73348e+07	2.27889e+07	3.681e+07	2.67747e+07	1.76403e+07	1.84227e+07	3.39805e+07	2.85793e+07	2.25125e+07	2.8764e+07	22	22	18	21	21	22	22	20	22	21	20	21	22	22	18	21	21	22	22	20	22	21	20	21
Q99L13	58875	Hibadh	TRUE	3-hydroxyisobutyrate dehydrogenase, mitochondrial OS=Mus musculus OX=10090 GN=Hibadh PE=1 SV=1	42	12	223	12	78.705	674.85	12	35.4	3.30647e+07	5.21787e+07	2.11928e+07	2.11928e+07	4.48767e+07	7.69761e+07	7.18468e+07	2.38307e+07	2.6608e+07	2.05565e+08	8.92037e+07	2.8789e+07	4.89525e+07	11	12	11	12	12	12	11	11	12	12	11	12	11	12	11	12	12	12	11	11	12	12	11	12
P97792	13052	Cxadr	FALSE	Coxsackievirus and adenovirus receptor homolog OS=Mus musculus OX=10090 GN=Cxadr PE=1 SV=1	51	15	223	15	81.307	546.86	15	39.9	7.60641e+07	9.82287e+07	6.88308e+07	6.88308e+07	8.39414e+07	1.0044e+08	1.17543e+08	5.97211e+07	7.13651e+07	2.44348e+08	1.22291e+08	5.52124e+07	8.27504e+07	14	14	14	14	14	14	14	15	14	13	14	14	14	14	14	14	14	14	14	15	14	13	14	14
Q8WTY4	109006	Ciapin1	FALSE	Anamorsin OS=Mus musculus OX=10090 GN=Ciapin1 PE=1 SV=1	66	14	222	14	86.342	728.24	14	33.4	2.26806e+07	4.57985e+07	3.39972e+07	3.39972e+07	1.97232e+07	3.11377e+07	2.48544e+07	4.34203e+07	6.9918e+07	3.47028e+07	4.05683e+07	5.42001e+07	4.04712e+07	13	13	12	12	13	12	14	14	13	13	14	13	13	13	12	12	13	12	14	14	13	13	14	13
O70252	15369	Hmox2	FALSE	Heme oxygenase 2 OS=Mus musculus OX=10090 GN=Hmox2 PE=1 SV=1	69	17	222	17	89.925	647.35	17	35.7	4.94179e+07	7.2399e+07	5.17871e+07	5.17871e+07	4.41377e+07	6.84451e+07	4.85635e+07	4.9303e+07	5.31421e+07	9.50324e+07	6.81338e+07	4.18369e+07	5.97042e+07	14	14	15	16	15	15	15	16	16	15	13	16	14	14	15	16	15	15	15	16	16	15	13	16
Q3URD3	83997	Slmap	FALSE	Sarcolemmal membrane-associated protein OS=Mus musculus OX=10090 GN=Slmap PE=1 SV=2	23	20	222	20	97.857	621.38	20	96.9	2.03665e+07	3.27245e+07	2.37761e+07	2.37761e+07	2.42223e+07	3.43872e+07	2.36834e+07	2.34534e+07	2.57598e+07	3.15184e+07	3.4188e+07	2.87222e+07	3.26541e+07	19	17	15	17	19	18	17	17	17	17	18	18	19	17	15	17	19	18	17	17	17	17	18	18
Q3UQ44	544963	Iqgap2	FALSE	Ras GTPase-activating-like protein IQGAP2 OS=Mus musculus OX=10090 GN=Iqgap2 PE=1 SV=2	23	27	221	26	140.732	631.14	27	180.4	3.28858e+07	70187406	6.56517e+06	6.56517e+06	2.6392e+07	6.18177e+07	5.03762e+07	1.11233e+07	8.12817e+06	3.51528e+07	3.41145e+07	7.43828e+06	2.02811e+07	22	24	9	21	24	24	19	16	22	19	14	20	21	24	9	21	24	24	19	16	22	19	14	20
Q99P72	68585	Rtn4	FALSE	Reticulon-4 OS=Mus musculus OX=10090 GN=Rtn4 PE=1 SV=2	34	22	221	22	114.439	685.39	22	126.5	1.22408e+07	2.10876e+07	3.87913e+07	3.87913e+07	3.15646e+07	3.12258e+07	2.44794e+07	2.43321e+07	3.27079e+07	3.00984e+07	3.7573e+07	4.3337e+07	60759941	12	13	17	19	15	20	14	18	12	19	21	22	12	13	17	19	15	20	14	18	12	19	21	22
P09813	11807	Apoa2	FALSE	Apolipoprotein A-II OS=Mus musculus OX=10090 GN=Apoa2 PE=1 SV=2	78	9	220	9	77.006	744.4	9	11.3	1.59699e+08	2.60774e+08	2.43651e+08	2.43651e+08	1.06865e+08	1.96653e+08	1.10854e+08	1.80509e+08	2.17326e+08	2.11233e+08	1.14558e+08	1.67402e+08	1.5537e+08	9	8	8	7	7	8	9	9	8	8	8	8	9	8	8	7	7	8	9	9	8	8	8	8
Q9CYZ2	66314	Tpd52l2	FALSE	Tumor protein D54 OS=Mus musculus OX=10090 GN=Tpd52l2 PE=1 SV=1	55	12	220	12	63.959	661.46	12	24	1.14324e+08	1.83888e+08	2.17012e+08	2.17012e+08	1.21018e+08	1.50095e+08	9.00288e+07	1.91003e+08	1.99458e+08	1.57095e+08	1.47948e+08	1.92303e+08	1.66794e+08	12	12	12	12	12	12	12	12	12	12	12	12	12	12	12	12	12	12	12	12	12	12	12	12
Q91ZX7	16971	Lrp1	FALSE	Prolow-density lipoprotein receptor-related protein 1 OS=Mus musculus OX=10090 GN=Lrp1 PE=1 SV=1	9	28	220	28	115.282	572.75	28	504.4	2.06325e+07	2.18015e+07	2.09466e+07	2.09466e+07	1.49056e+07	2.14797e+07	1.62847e+07	1.95213e+07	2.02803e+07	3.00587e+07	1.9855e+07	1.70114e+07	2.05345e+07	25	22	21	25	25	23	21	19	25	23	22	24	25	22	21	25	25	23	21	19	25	23	22	24
O35711	19024	Ppfibp2	FALSE	Liprin-beta-2 OS=Mus musculus OX=10090 GN=Ppfibp2 PE=1 SV=3	31	19	219	19	97.59	630.99	19	98.7	1.52646e+07	1.97768e+07	1.83011e+07	1.83011e+07	1.44124e+07	1.9208e+07	1.28767e+07	1.68523e+07	1.44981e+07	1.26006e+07	1.86164e+07	1.93071e+07	1.60149e+07	19	17	17	17	19	17	19	19	15	18	19	17	19	17	17	17	19	17	19	19	15	18	19	17
P10605	13030	Ctsb	FALSE	Cathepsin B OS=Mus musculus OX=10090 GN=Ctsb PE=1 SV=2	45	12	218	12	94.771	580.87	12	37.3	6.93943e+07	1.01799e+08	4.45112e+07	4.45112e+07	8.56413e+07	1.57601e+08	9.062e+07	4.31569e+07	6.38238e+07	1.38541e+08	1.20424e+08	4.922e+07	9.93235e+07	11	11	10	12	11	10	10	12	11	12	12	11	11	11	10	12	11	10	10	12	11	12	12	11
P49586	13026	Pcyt1a	FALSE	Choline-phosphate cytidylyltransferase A OS=Mus musculus OX=10090 GN=Pcyt1a PE=1 SV=1	60	17	218	12	84.551	530.35	17	41.6	2.82738e+07	3.89498e+07	3.13386e+07	3.13386e+07	2.723e+07	3.99129e+07	3.063e+07	2.04428e+07	2.43299e+07	4.93582e+07	4.18364e+07	2.24046e+07	3.61997e+07	17	15	16	16	17	17	16	17	16	17	16	17	12	10	11	11	12	12	11	12	11	12	11	12
Q3UMT1	232807	Ppp1r12c	FALSE	Protein phosphatase 1 regulatory subunit 12C OS=Mus musculus OX=10090 GN=Ppp1r12c PE=1 SV=1	48	28	217	28	120.399	651.53	28	84.6	1.1501e+07	2.38968e+07	2.39588e+07	2.39588e+07	1.62314e+07	2.10585e+07	1.29718e+07	1.44165e+07	1.85199e+07	1.3666e+07	1.44403e+07	1.68265e+07	1.96914e+07	23	24	25	24	22	24	22	25	21	21	25	26	23	24	25	24	22	24	22	25	21	21	25	26
P48758	12408	Cbr1	FALSE	Carbonyl reductase [NADPH] 1 OS=Mus musculus OX=10090 GN=Cbr1 PE=1 SV=3	68	16	217	15	97.464	621.29	16	30.6	4.79322e+07	8.23409e+07	3.53312e+07	3.53312e+07	1.14632e+08	2.18994e+08	1.94979e+08	1.73581e+07	2.28225e+07	1.33264e+08	1.63166e+08	3.4064e+07	9.61067e+07	15	15	14	16	16	16	14	14	16	16	14	16	14	14	13	15	15	15	13	13	15	15	13	15
Q8BP92	26611	Rcn2	FALSE	Reticulocalbin-2 OS=Mus musculus OX=10090 GN=Rcn2 PE=1 SV=1	53	15	217	15	84.953	584.6	15	37.2	1.58031e+07	2.63302e+07	2.88744e+07	2.88744e+07	2.22322e+07	2.60479e+07	1.80356e+07	2.76452e+07	3.12809e+07	2.2948e+07	2.63999e+07	4.76402e+07	3.68668e+07	13	13	14	13	13	13	14	14	12	14	14	14	13	13	14	13	13	13	14	14	12	14	14	14
O08715	11640	Akap1	TRUE	A-kinase anchor protein 1, mitochondrial OS=Mus musculus OX=10090 GN=Akap1 PE=1 SV=4	33	18	216	18	95.304	676.56	18	92.1	3.46752e+07	5.7576e+07	4.6216e+07	4.6216e+07	2.43895e+07	4.34557e+07	2.12379e+07	4.75591e+07	4.29827e+07	2.67573e+07	3.57187e+07	5.38887e+07	3.52244e+07	16	16	16	17	15	16	17	18	15	16	17	17	16	16	16	17	15	16	17	18	15	16	17	17
P46938	22601	Yap1	FALSE	Transcriptional coactivator YAP1 OS=Mus musculus OX=10090 GN=Yap1 PE=1 SV=2	51	15	216	14	101.12	679.53	15	52.4	4.71475e+07	6.9471e+07	6.66369e+07	6.66369e+07	4.98301e+07	5.29964e+07	4.19716e+07	4.93495e+07	5.79846e+07	7.08544e+07	5.35824e+07	5.6235e+07	6.28509e+07	14	15	14	14	14	14	14	15	14	14	14	14	13	14	13	13	13	13	13	14	13	13	13	13
P29341	18458	Pabpc1	FALSE	Polyadenylate-binding protein 1 OS=Mus musculus OX=10090 GN=Pabpc1 PE=1 SV=2	15	5	215	5	63.205	831.74	5	70.6	9.50457e+07	2.33433e+08	1.5346e+08	1.5346e+08	9.30215e+07	1.50612e+08	7.77446e+07	1.48183e+08	1.459e+08	87363215	1.01651e+08	1.80167e+08	1.23702e+08	5	5	5	5	5	5	5	5	5	5	5	5	5	5	5	5	5	5	5	5	5	5	5	5
Q61335	27061	Bcap31	FALSE	B-cell receptor-associated protein 31 OS=Mus musculus OX=10090 GN=Bcap31 PE=1 SV=4	46	15	215	15	105.061	569.61	15	27.9	1.05293e+07	2.9848e+07	1.4083e+07	1.4083e+07	1.86621e+07	2.58152e+07	2.48023e+07	1.50507e+07	1.57791e+07	3.53942e+07	2.02158e+07	1.48921e+07	2.20874e+07	15	15	13	15	15	15	14	15	15	15	14	15	15	15	13	15	15	15	14	15	15	15	14	15
P62852	75617	Rps25	FALSE	40S ribosomal protein S25 OS=Mus musculus OX=10090 GN=Rps25 PE=1 SV=1	58	11	215	11	33.445	562.39	11	13.7	3.29017e+08	5.82807e+08	6.53294e+08	6.53294e+08	3.26061e+08	4.15219e+08	2.67855e+08	5.23813e+08	5.17787e+08	4.81841e+08	4.22651e+08	5.59199e+08	4.86589e+08	11	11	11	11	10	10	11	11	11	11	11	11	11	11	11	11	10	10	11	11	11	11	11	11
Q99JY3	107526	Gimap4	FALSE	GTPase IMAP family member 4 OS=Mus musculus OX=10090 GN=Gimap4 PE=1 SV=2	55	16	215	16	86.399	536.07	16	38	2.42368e+07	3.28595e+07	1.42386e+07	1.42386e+07	2.78061e+07	5.0278e+07	2.73479e+07	1.24737e+07	1.88546e+07	4.47912e+07	4.17256e+07	1.17594e+07	3.51731e+07	13	14	14	14	14	14	13	14	15	14	13	14	13	14	14	14	14	14	13	14	15	14	13	14
Q9JHL1	65962	Slc9a3r2	FALSE	Na(+)/H(+) exchange regulatory cofactor NHE-RF2 OS=Mus musculus OX=10090 GN=Slc9a3r2 PE=1 SV=2	56	17	214	17	113.494	686.38	17	37.4	3.04322e+07	7.1837e+07	5.68502e+07	5.68502e+07	3.57197e+07	4.09415e+07	2.96197e+07	4.06913e+07	4.53413e+07	5.80767e+07	5.23562e+07	5.26608e+07	4.79036e+07	16	16	17	16	17	16	16	16	17	17	17	17	16	16	17	16	17	16	16	16	17	17	17	17
Q9DB20	28080	Atp5o	TRUE	ATP synthase subunit O, mitochondrial OS=Mus musculus OX=10090 GN=Atp5po PE=1 SV=1	65	11	214	11	72.154	585.91	11	23.3	6.64651e+07	1.1293e+08	6.21134e+07	6.21134e+07	6.53075e+07	1.08076e+08	9.61152e+07	5.47892e+07	6.23125e+07	2.54663e+08	1.01824e+08	5.49924e+07	8.88428e+07	11	11	11	11	11	11	11	11	11	11	11	11	11	11	11	11	11	11	11	11	11	11	11	11
Q9D273	77697	Mmab	TRUE	Corrinoid adenosyltransferase OS=Mus musculus OX=10090 GN=Mmab PE=1 SV=1	60	13	214	13	98.41	617.32	13	26.3	3.94507e+07	6.99654e+07	6.25413e+07	6.25413e+07	4.13262e+07	6.22132e+07	4.53261e+07	5.6251e+07	6.18555e+07	1.17166e+08	6.55594e+07	8.09947e+07	6.22218e+07	13	13	13	13	12	12	12	13	13	12	12	13	13	13	13	13	12	12	12	13	13	12	12	13
O88746	21968	Tom1	FALSE	Target of Myb protein 1 OS=Mus musculus OX=10090 GN=Tom1 PE=1 SV=1	70	21	213	21	97.08	639.48	21	54.3	2.14621e+07	3.72899e+07	2.64375e+07	2.64375e+07	2.1697e+07	2.45759e+07	1.87717e+07	2.47916e+07	2.95419e+07	3.73601e+07	2.33912e+07	2.59777e+07	3.17989e+07	19	19	18	18	20	20	20	20	20	19	20	21	19	19	18	18	20	20	20	20	20	19	20	21
O08784	21453	Tcof1	FALSE	Treacle protein OS=Mus musculus OX=10090 GN=Tcof1 PE=1 SV=1	28	27	213	27	119.435	612.83	27	134.9	5.76212e+06	1.1669e+07	1.58403e+07	1.58403e+07	8.06996e+06	1.10866e+07	6.3055e+06	1.30935e+07	1.51474e+07	1.17221e+07	9.57622e+06	1.61887e+07	1.35026e+07	24	23	26	25	25	22	27	26	24	25	25	25	24	23	26	25	25	22	27	26	24	25	25	25
P31809	26365	Ceacam1	FALSE	Carcinoembryonic antigen-related cell adhesion molecule 1 OS=Mus musculus OX=10090 GN=Ceacam1 PE=1 SV=1	26	10	212	6	66.345	621.09	10	57	3.04444e+07	3.35216e+07	6.14117e+07	6.14117e+07	3.58209e+07	3.32753e+07	2.06312e+07	3.55021e+07	4.70925e+07	4.07289e+07	3.68913e+07	4.96855e+07	4.83925e+07	10	9	10	10	9	8	8	10	10	10	10	10	6	5	6	6	6	5	4	6	6	6	6	6
Q62093	20382	Srsf2	FALSE	Serine/arginine-rich splicing factor 2 OS=Mus musculus OX=10090 GN=Srsf2 PE=1 SV=4	27	5	212	5	39.45	639.28	5	25.5	9.48222e+07	1.40699e+08	1.03659e+08	1.03659e+08	6.14559e+07	1.06448e+08	7.3588e+07	8.20396e+07	1.0605e+08	1.53942e+08	9.48724e+07	2.86198e+07	3.64295e+07	5	5	5	5	5	5	5	5	5	5	5	5	5	5	5	5	5	5	5	5	5	5	5	5
Q9CQ19	98932	Myl9	FALSE	Myosin regulatory light polypeptide 9 OS=Mus musculus OX=10090 GN=Myl9 PE=1 SV=3	80	9	211	4	75.982	626.27	9	19.8	3.77709e+06	4.85471e+06	7.16055e+06	7.16055e+06	3.96794e+06	5.1184e+06	3.43777e+06	4.30239e+06	4.56174e+06	5.41453e+06	5.73868e+06	5.78561e+06	5.62547e+06	8	8	9	7	9	8	7	8	9	9	8	9	3	3	4	2	4	3	2	3	4	4	3	4
Q7TNV0	110052	Dek	FALSE	Protein DEK OS=Mus musculus OX=10090 GN=Dek PE=1 SV=1	38	15	211	15	68.281	541.55	15	43.1	2.61395e+07	5.62669e+07	6.61621e+07	6.61621e+07	3.92138e+07	5.4445e+07	3.19225e+07	4.00002e+07	5.19475e+07	5.25399e+07	4.70417e+07	6.069e+07	4.66141e+07	13	15	14	14	14	14	14	14	14	14	14	14	13	15	14	14	14	14	14	14	14	14	14	14
Q00915	19659	Rbp1	FALSE	Retinol-binding protein 1 OS=Mus musculus OX=10090 GN=Rbp1 PE=1 SV=2	68	13	211	13	77.297	527.85	13	15.8	60180475	1.21297e+08	6.0092e+07	6.0092e+07	8.05757e+07	1.4413e+08	1.15685e+08	5.83532e+07	6.79139e+07	1.31838e+08	1.42019e+08	5.59271e+07	1.09059e+08	12	13	12	13	13	13	10	12	13	13	10	13	12	13	12	13	13	13	10	12	13	13	10	13
Q6PAM1	109658	Txlna	FALSE	Alpha-taxilin OS=Mus musculus OX=10090 GN=Txlna PE=1 SV=1	48	25	210	25	96.421	530.69	25	62.3	1.61168e+07	1.96704e+07	2.98609e+07	2.98609e+07	1.42928e+07	1.62235e+07	9.53954e+06	1.83694e+07	2.32552e+07	1.56657e+07	1.41847e+07	2.24364e+07	2.00062e+07	24	20	25	25	21	22	24	25	21	22	24	24	24	20	25	25	21	22	24	25	21	22	24	24
P14426	14964	H2-D1	FALSE	H-2 class I histocompatibility antigen, D-K alpha chain OS=Mus musculus OX=10090 GN=H2-D1 PE=1 SV=1	39	14	209	5	61.49	497.88	14	40.6	61476.2	150259	1.51218e+07	1.51218e+07	1.90445e+07	1.49187e+06	18727.8	48850.1	384362	3.60845e+07	240522	20232.5	212792	8	8	13	13	7	7	8	8	14	8	7	7	0	0	4	4	0	0	0	1	5	0	0	0
Q8BJ05	75553	Zc3h14	FALSE	Zinc finger CCCH domain-containing protein 14 OS=Mus musculus OX=10090 GN=Zc3h14 PE=1 SV=1	36	20	209	20	96.233	615.08	20	82.4	9.19027e+06	1.99749e+07	1.57348e+07	1.57348e+07	1.04266e+07	1.64736e+07	8.62928e+06	1.40766e+07	1.52466e+07	1.15978e+07	13111629	1.51249e+07	1.47986e+07	17	19	19	19	19	18	19	19	18	19	19	19	17	19	19	19	19	18	19	19	18	19	19	19
Q62165	13138	Dag1	FALSE	Dystroglycan 1 OS=Mus musculus OX=10090 GN=Dag1 PE=1 SV=4	20	15	208	15	81.617	597.48	15	96.8	2.86748e+07	3.89094e+07	5.45705e+07	5.45705e+07	3.92734e+07	3.84828e+07	2.93464e+07	4.28135e+07	4.89868e+07	4.41281e+07	3.74203e+07	5.75999e+07	4.81566e+07	15	15	14	15	14	15	14	15	15	15	14	15	15	15	14	15	14	15	14	15	15	15	14	15
P61022	56398	Chp1	FALSE	Calcineurin B homologous protein 1 OS=Mus musculus OX=10090 GN=Chp1 PE=1 SV=2	70	14	208	14	73.563	581.03	14	22.4	5.32142e+07	9.39417e+07	9.6875e+07	9.6875e+07	6.78255e+07	8.24174e+07	6.67887e+07	5.65225e+07	6.78071e+07	8.94505e+07	7.75699e+07	8.01306e+07	9.45075e+07	13	12	13	12	13	13	12	13	13	13	12	13	13	12	13	12	13	13	12	13	13	13	12	13
P68134	11459	Acta1	FALSE	Actin, alpha skeletal muscle OS=Mus musculus OX=10090 GN=Acta1 PE=1 SV=1	28	9	208	1	63.283	508.97	9	42	4.38758e+06	8.96e+06	3.36881e+06	3.36881e+06	4.18953e+06	1.53652e+07	1.20402e+07	3.68345e+06	3.96836e+06	2.65816e+07	9.948e+06	3.26582e+06	9.12173e+06	9	9	9	9	9	9	9	9	9	9	9	9	1	1	1	1	1	1	1	1	1	1	1	1
Q3UMU9	15193	Hdgfl2	FALSE	Hepatoma-derived growth factor-related protein 2 OS=Mus musculus OX=10090 GN=Hdgfl2 PE=1 SV=1	30	22	208	20	92.909	532.25	22	74.2	1.69604e+07	2.26437e+07	1.78348e+07	1.78348e+07	1.31548e+07	2.46048e+07	1.33454e+07	1.40699e+07	1.5691e+07	2.38824e+07	2.09245e+07	1.09154e+07	1.22466e+07	22	22	20	21	22	22	21	21	22	21	19	20	20	20	18	19	20	20	19	19	20	19	17	18
P31230	13722	Aimp1	FALSE	Aminoacyl tRNA synthase complex-interacting multifunctional protein 1 OS=Mus musculus OX=10090 GN=Aimp1 PE=1 SV=2	76	17	208	17	107.433	594.23	17	34	4.19469e+07	6.32802e+07	3.47e+07	3.47e+07	4.23521e+07	5.5712e+07	4.24726e+07	2.81384e+07	3.50878e+07	6.21243e+07	5.65644e+07	3.09048e+07	5.21344e+07	17	17	15	17	17	17	14	17	16	17	17	17	17	17	15	17	17	17	14	17	16	17	17	17
P62075	30055	Timm13	TRUE	Mitochondrial import inner membrane translocase subunit Tim13 OS=Mus musculus OX=10090 GN=Timm13 PE=1 SV=1	79	7	207	7	38.926	607.52	7	10.5	1.50277e+08	3.64809e+08	3.0587e+08	3.0587e+08	2.15156e+08	3.04383e+08	1.99852e+08	2.70181e+08	2.96614e+08	4.4569e+08	2.49442e+08	4.29626e+08	2.97354e+08	7	7	7	7	7	7	7	7	7	7	7	7	7	7	7	7	7	7	7	7	7	7	7	7
Q61033	21917	Tmpo	FALSE	Lamina-associated polypeptide 2, isoforms alpha/zeta OS=Mus musculus OX=10090 GN=Tmpo PE=1 SV=4	31	16	206	5	72.144	698.69	16	75.1	1.56451e+06	3.49598e+06	1.36055e+06	1.36055e+06	1.52312e+06	2.78329e+06	1.77742e+06	1.70243e+06	1.70499e+06	2.10217e+06	2.06343e+06	1.79551e+06	1.69553e+06	15	15	14	15	15	15	14	15	16	15	15	15	4	4	3	4	4	4	4	4	5	4	4	4
Q62419	20405	Sh3gl1	FALSE	Endophilin-A2 OS=Mus musculus OX=10090 GN=Sh3gl1 PE=1 SV=1	54	17	206	17	68.955	534.24	17	41.5	2.06114e+07	3.61244e+07	3.14077e+07	3.14077e+07	2.01276e+07	2.80201e+07	1.72081e+07	2.28749e+07	2.64958e+07	3.13472e+07	2.81356e+07	3.07102e+07	3.01275e+07	15	17	15	17	16	15	16	17	17	17	17	17	15	17	15	17	16	15	16	17	17	17	17	17
Q9CXI5	74840	Manf	FALSE	Mesencephalic astrocyte-derived neurotrophic factor OS=Mus musculus OX=10090 GN=Manf PE=1 SV=1	45	10	205	10	54.393	580.34	10	20.4	8.80593e+07	1.43059e+08	1.30758e+08	1.30758e+08	7.56737e+07	9.10034e+07	6.28967e+07	1.20919e+08	1.40307e+08	1.34231e+08	9.56757e+07	1.09186e+08	1.20922e+08	10	10	10	10	10	10	10	10	10	10	10	10	10	10	10	10	10	10	10	10	10	10	10	10
Q64345	15959	Ifit3	FALSE	Interferon-induced protein with tetratricopeptide repeats 3 OS=Mus musculus OX=10090 GN=Ifit3 PE=1 SV=1	46	20	205	20	91.567	538.57	20	47.2	8.84132e+06	1.55455e+07	9.53512e+06	9.53512e+06	1.30538e+07	1.08757e+07	7.64552e+06	9.77371e+06	1.89577e+07	1.14149e+07	1.51802e+07	1.40929e+07	2.14841e+07	19	19	17	19	18	17	18	19	17	18	18	19	19	19	17	19	18	17	18	19	17	18	18	19
Q8C3X2	66365	Ccdc90b	TRUE	Coiled-coil domain-containing protein 90B, mitochondrial OS=Mus musculus OX=10090 GN=Ccdc90b PE=1 SV=1	59	16	205	15	70.512	577.95	16	29.6	2.13434e+07	3.11433e+07	2.86066e+07	2.86066e+07	1.7484e+07	2.17184e+07	1.57945e+07	2.91806e+07	2.60477e+07	5.26743e+07	3.24818e+07	3.70803e+07	3.58075e+07	15	16	15	15	15	15	15	14	16	15	15	16	14	15	14	14	14	14	14	13	15	14	14	15
P62897	13063	Cycs	TRUE	Cytochrome c, somatic OS=Mus musculus OX=10090 GN=Cycs PE=1 SV=2	50	7	205	7	52.942	613.03	7	11.6	2.00965e+08	4.33088e+08	4.55787e+08	4.55787e+08	2.52289e+08	3.3408e+08	2.01692e+08	4.37299e+08	4.58261e+08	6.08096e+08	3.36715e+08	5.07393e+08	3.79273e+08	7	7	7	7	7	7	7	7	7	7	7	7	7	7	7	7	7	7	7	7	7	7	7	7
Q9D554	75062	Sf3a3	FALSE	Splicing factor 3A subunit 3 OS=Mus musculus OX=10090 GN=Sf3a3 PE=1 SV=2	49	20	205	20	102.562	571.09	20	58.8	2.34952e+07	3.64704e+07	2.24794e+07	2.24794e+07	2.18407e+07	3.82926e+07	2.524e+07	1.67611e+07	1.63315e+07	4.13541e+07	3.53019e+07	1.04757e+07	2.77697e+07	17	17	17	17	18	17	18	17	17	18	16	17	17	17	17	17	18	17	18	17	17	18	16	17
E9Q394	75547	Akap13	FALSE	A-kinase anchor protein 13 OS=Mus musculus OX=10090 GN=Akap13 PE=1 SV=1	17	26	204	26	122.808	586.3	26	303.8	9.94804e+06	1.18628e+07	1.79836e+07	1.79836e+07	1.00158e+07	8.91498e+06	6.7237e+06	1.3823e+07	1.67801e+07	1.02411e+07	8.80459e+06	1.60615e+07	1.27292e+07	20	14	22	21	15	16	22	21	19	18	23	21	20	14	22	21	15	16	22	21	19	18	23	21
P49443	19042	Ppm1a	FALSE	Protein phosphatase 1A OS=Mus musculus OX=10090 GN=Ppm1a PE=1 SV=1	41	15	204	13	77.338	540.22	15	42.4	1.9151e+07	2.98961e+07	1.27994e+07	1.27994e+07	1.81189e+07	3.22713e+07	2.53271e+07	1.13878e+07	1.23576e+07	3.93225e+07	2.90468e+07	9.61247e+06	2.01342e+07	14	14	13	14	15	14	14	15	15	15	15	15	12	12	11	12	13	12	12	13	13	13	13	13
P16015	12350	Car3	FALSE	Carbonic anhydrase 3 OS=Mus musculus OX=10090 GN=Ca3 PE=1 SV=3	75	14	204	14	83.757	563.13	14	29.3	9.34461e+07	1.98978e+08	9.76913e+07	9.76913e+07	9.5375e+07	1.62028e+08	8.307e+07	7.76404e+07	7.19607e+07	2.36272e+08	1.44545e+08	4.52078e+07	8.53101e+07	13	13	13	13	13	13	13	13	14	14	13	13	13	13	13	13	13	13	13	13	14	14	13	13
Q9WUK2	22384	Eif4h	FALSE	Eukaryotic translation initiation factor 4H OS=Mus musculus OX=10090 GN=Eif4h PE=1 SV=3	46	11	204	11	40.755	447.95	11	27.3	7.2107e+07	1.0454e+08	1.07873e+08	1.07873e+08	7.2202e+07	9.06571e+07	5.63643e+07	7.03188e+07	8.93362e+07	1.22105e+08	9.13065e+07	6.90101e+07	8.8843e+07	11	11	11	11	11	11	11	11	11	11	11	11	11	11	11	11	11	11	11	11	11	11	11	11
Q01768	18103	Nme2	FALSE	Nucleoside diphosphate kinase B OS=Mus musculus OX=10090 GN=Nme2 PE=1 SV=1	73	9	203	5	67.948	583.96	9	17.4	3.63556e+07	7.17835e+07	2.60751e+07	2.60751e+07	3.74786e+07	6.79205e+07	6.02621e+07	2.76423e+07	2.84593e+07	1.13787e+08	5.91454e+07	2.4394e+07	4.58749e+07	9	9	9	9	9	9	9	9	9	9	9	9	5	5	5	5	5	5	5	5	5	5	5	5
Q99KF1	67511	Tmed9	FALSE	Transmembrane emp24 domain-containing protein 9 OS=Mus musculus OX=10090 GN=Tmed9 PE=1 SV=2	43	10	203	9	73.689	482.69	10	27.1	3.61689e+07	5.80557e+07	2.16458e+07	2.16458e+07	3.03649e+07	5.52207e+07	3.78116e+07	2.06826e+07	2.48279e+07	7.56823e+07	4.76991e+07	1.24208e+07	3.28136e+07	10	10	10	10	10	10	10	10	10	10	9	10	9	9	9	9	9	9	9	9	9	9	8	9
Q99LX0	57320	Park7	TRUE	Parkinson disease protein 7 homolog OS=Mus musculus OX=10090 GN=Park7 PE=1 SV=1	80	14	203	14	87.246	604.43	14	20	7.80946e+07	1.0421e+08	4.55363e+07	4.55363e+07	6.15015e+07	1.03983e+08	9.80267e+07	3.50241e+07	3.9294e+07	1.81167e+08	1.26671e+08	3.16558e+07	7.01316e+07	12	11	10	12	12	11	10	12	13	14	10	13	12	11	10	12	12	11	10	12	13	14	10	13
Q6P9Q6	338355	Fkbp15	FALSE	FK506-binding protein 15 OS=Mus musculus OX=10090 GN=Fkbp15 PE=1 SV=2	21	20	203	20	90.248	588.48	20	132.9	1.24266e+07	2.30605e+07	1.96699e+07	1.96699e+07	1.41783e+07	2.05382e+07	1.02398e+07	1.53836e+07	1.86152e+07	1.12573e+07	1.40635e+07	2.23757e+07	1.86651e+07	19	20	19	19	18	18	19	20	18	19	20	20	19	20	19	19	18	18	19	20	18	19	20	20
Q9CPY7	66988	Lap3	TRUE	Cytosol aminopeptidase OS=Mus musculus OX=10090 GN=Lap3 PE=1 SV=3	49	21	202	21	99.95	505.23	21	56.1	1.64261e+07	2.73965e+07	1.75549e+07	1.75549e+07	1.47711e+07	3.35083e+07	2.41163e+07	1.4746e+07	1.64216e+07	3.7831e+07	2.62063e+07	1.59194e+07	2.00737e+07	18	17	17	18	19	21	17	19	20	19	18	18	18	17	17	18	19	21	17	19	20	19	18	18
Q9WV54	11886	Asah1	FALSE	Acid ceramidase OS=Mus musculus OX=10090 GN=Asah1 PE=1 SV=1	41	16	202	16	72.028	513.56	16	44.6	1.59046e+07	3.24229e+07	1.61808e+07	1.61808e+07	2.13463e+07	4.29687e+07	2.29369e+07	1.37292e+07	1.57183e+07	3.33535e+07	2.98993e+07	1.39208e+07	22444163	16	16	15	16	16	16	15	16	16	16	16	16	16	16	15	16	16	16	15	16	16	16	16	16
Q6ZPZ3	330474	Zc3h4	FALSE	Zinc finger CCCH domain-containing protein 4 OS=Mus musculus OX=10090 GN=Zc3h4 PE=1 SV=2	27	21	202	21	96.101	536.13	21	140.9	7.50467e+06	1.32001e+07	1.24816e+07	1.24816e+07	8.24415e+06	1.29673e+07	6.56445e+06	1.20176e+07	1.18676e+07	1.10044e+07	8.79533e+06	1.32105e+07	1.08984e+07	17	18	20	18	17	17	18	20	19	17	19	19	17	18	20	18	17	17	18	20	19	17	19	19
Q9D6S7	67871	Mrrf	TRUE	Ribosome-recycling factor, mitochondrial OS=Mus musculus OX=10090 GN=Mrrf PE=1 SV=1	45	9	202	9	77.607	657.05	9	29	3.66644e+07	5.38923e+07	5.11613e+07	5.11613e+07	3.21011e+07	4.00856e+07	2.82049e+07	5.58368e+07	5.21252e+07	6.79214e+07	5.09724e+07	6.39599e+07	4.57507e+07	9	9	8	9	9	9	8	9	8	9	9	9	9	9	8	9	9	9	8	9	8	9	9	9
Q283N4	231903	Urad	FALSE	2-oxo-4-hydroxy-4-carboxy-5-ureidoimidazoline decarboxylase OS=Mus musculus OX=10090 GN=Urad PE=1 SV=1	56	10	202	10	55.525	613.71	10	20	1.22242e+08	2.014e+08	1.71138e+08	1.71138e+08	1.37598e+08	1.81174e+08	1.39632e+08	1.12105e+08	1.6752e+08	1.96139e+08	1.82179e+08	1.41806e+08	1.89263e+08	10	10	10	10	10	10	10	10	10	10	10	10	10	10	10	10	10	10	10	10	10	10	10	10
P19783	12857	Cox4i1	TRUE	Cytochrome c oxidase subunit 4 isoform 1, mitochondrial OS=Mus musculus OX=10090 GN=Cox4i1 PE=1 SV=2	58	11	201	11	77.224	544.5	11	19.5	2.06991e+08	3.43381e+08	7.87306e+07	7.87306e+07	2.05988e+08	4.44104e+08	3.92772e+08	1.06292e+08	1.11523e+08	1.01052e+09	4.2059e+08	6.93324e+07	214606971	10	10	10	10	10	10	10	10	11	10	10	10	10	10	10	10	10	10	10	10	11	10	10	10
Q9R257	15199	Hebp1	TRUE	Heme-binding protein 1 OS=Mus musculus OX=10090 GN=Hebp1 PE=1 SV=2	85	12	201	12	78.28	635.4	12	21.1	6.9119e+07	1.10827e+08	8.6451e+07	8.6451e+07	7.55152e+07	7.0163e+07	6.4486e+07	6.40407e+07	1.04551e+08	1.39499e+08	1.00126e+08	9.64448e+07	89839416	12	12	12	12	12	12	11	12	12	12	12	12	12	12	12	12	12	12	11	12	12	12	12	12
A2ALU4	110380	Shroom2	FALSE	Protein Shroom2 OS=Mus musculus OX=10090 GN=Shroom2 PE=1 SV=1	28	29	201	29	113.938	522.67	29	164.6	9.42023e+06	1.68845e+07	1.44813e+07	1.44813e+07	9.80033e+06	1.29586e+07	7.73167e+06	1.11329e+07	1.25538e+07	7.88348e+06	1.00152e+07	1.89329e+07	1.42337e+07	24	24	23	24	22	21	24	27	18	21	26	23	24	24	23	24	22	21	24	27	18	21	26	23
Q9ERB0	67474	Snap29	TRUE	Synaptosomal-associated protein 29 OS=Mus musculus OX=10090 GN=Snap29 PE=1 SV=1	70	16	201	16	61.075	541.26	16	29.6	2.78952e+07	4.49002e+07	5.12331e+07	5.12331e+07	2.61808e+07	2.99894e+07	2.31232e+07	3.86773e+07	4.81781e+07	3.94744e+07	3.3376e+07	4.65982e+07	4.31072e+07	16	15	16	16	15	15	15	16	15	15	15	16	16	15	16	16	15	15	15	16	15	15	15	16
Q9D024	67163	Ccdc47	FALSE	PAT complex subunit CCDC47 OS=Mus musculus OX=10090 GN=Ccdc47 PE=1 SV=2	42	17	201	17	113.141	551.67	17	55.8	2.75938e+07	4.00269e+07	1.50929e+07	1.50929e+07	2.32064e+07	3.67844e+07	2.65009e+07	1.52152e+07	1.63793e+07	4.79836e+07	3.82483e+07	1.15753e+07	2.82281e+07	16	17	15	16	17	17	16	16	17	17	16	16	16	17	15	16	17	17	16	16	17	17	16	16
O35551	54189	Rabep1	FALSE	Rab GTPase-binding effector protein 1 OS=Mus musculus OX=10090 GN=Rabep1 PE=1 SV=2	38	29	199	29	111.733	488.01	29	99.5	1.41303e+07	2.48912e+07	1.66354e+07	1.66354e+07	1.3493e+07	1.66934e+07	1.40106e+07	1.61185e+07	1.60605e+07	2.61807e+07	1.51623e+07	1.39066e+07	1.7613e+07	28	27	24	28	24	26	28	28	27	26	26	28	28	27	24	28	24	26	28	28	27	26	26	28
Q61508	13601	Ecm1	FALSE	Extracellular matrix protein 1 OS=Mus musculus OX=10090 GN=Ecm1 PE=1 SV=2	42	19	199	19	80.052	501.21	19	62.8	2.00313e+07	3.46852e+07	3.16295e+07	3.16295e+07	3.2677e+07	4.89136e+07	3.26137e+07	2.40659e+07	2.76996e+07	3.58202e+07	4.66943e+07	4.71716e+07	4.65119e+07	18	16	16	17	15	17	17	17	16	18	19	19	18	16	16	17	15	17	17	17	16	18	19	19
Q99LI8	15239	Hgs	FALSE	Hepatocyte growth factor-regulated tyrosine kinase substrate OS=Mus musculus OX=10090 GN=Hgs PE=1 SV=2	28	18	198	18	73.717	542.87	18	86	1.42429e+07	2.29236e+07	1.99263e+07	1.99263e+07	1.44477e+07	2.19033e+07	1.43954e+07	1.26051e+07	1.64891e+07	2.7108e+07	1.77481e+07	1.48173e+07	1.98192e+07	16	15	16	16	15	15	15	17	17	18	16	18	16	15	16	16	15	15	15	17	17	18	16	18
Q6ZQ58	73158	Larp1	FALSE	La-related protein 1 OS=Mus musculus OX=10090 GN=Larp1 PE=1 SV=3	33	25	198	25	112.652	593.07	25	121.1	1.57883e+07	3.28412e+07	2.01148e+07	2.01148e+07	1.47315e+07	2.39036e+07	1.48132e+07	2.35702e+07	1.92462e+07	1.00241e+07	1.30314e+07	2.58688e+07	2.03472e+07	23	21	20	19	24	22	23	19	17	21	20	21	23	21	20	19	24	22	23	19	17	21	20	21
P70349	15254	Hint1	TRUE	Adenosine 5'-monophosphoramidase HINT1 OS=Mus musculus OX=10090 GN=Hint1 PE=1 SV=3	85	10	196	10	89.806	680.7	10	13.8	1.33989e+08	2.35871e+08	1.23471e+08	1.23471e+08	1.69287e+08	2.64348e+08	1.84023e+08	1.04525e+08	1.47344e+08	3.28334e+08	2.42973e+08	1.036e+08	1.82617e+08	10	10	9	10	9	10	10	10	10	10	10	10	10	10	9	10	9	10	10	10	10	10	10	10
Q99L47	70356	St13	FALSE	Hsc70-interacting protein OS=Mus musculus OX=10090 GN=St13 PE=1 SV=1	28	11	196	11	66.87	527.31	11	41.6	8.69593e+07	1.24085e+08	9.65341e+07	9.65341e+07	9.6686e+07	1.29749e+08	9.66255e+07	7.95775e+07	8.55038e+07	1.60815e+08	1.26539e+08	9.23082e+07	1.19928e+08	11	11	11	11	11	11	11	11	11	11	11	11	11	11	11	11	11	11	11	11	11	11	11	11
Q9WUR9	11639	Ak4	TRUE	Adenylate kinase 4, mitochondrial OS=Mus musculus OX=10090 GN=Ak4 PE=1 SV=1	80	12	195	12	72.041	547.14	12	25	5.72448e+07	8.28826e+07	4.52684e+07	4.52684e+07	5.81477e+07	7.76675e+07	7.42016e+07	4.41905e+07	4.78603e+07	1.91973e+08	8.93704e+07	4.75846e+07	7.82311e+07	12	12	12	12	11	12	12	12	12	12	12	12	12	12	12	12	11	12	12	12	12	12	12	12
Q9CR00	67151	Psmd9	FALSE	26S proteasome non-ATPase regulatory subunit 9 OS=Mus musculus OX=10090 GN=Psmd9 PE=1 SV=1	52	11	195	11	59.599	588.4	11	24.7	9.73688e+07	1.92148e+08	2.00056e+08	2.00056e+08	1.1632e+08	1.43049e+08	1.02819e+08	1.4061e+08	1.68106e+08	1.46233e+08	1.1877e+08	1.76326e+08	1.52237e+08	11	11	11	11	11	11	11	11	11	11	11	11	11	11	11	11	11	11	11	11	11	11	11	11
Q9JJG0	57752	Tacc2	FALSE	Transforming acidic coiled-coil-containing protein 2 OS=Mus musculus OX=10090 GN=Tacc2 PE=1 SV=2	25	21	195	18	79.92	538.38	21	124.1	6.8746e+06	1.32382e+07	2.181e+07	2.181e+07	1.12235e+07	1.50502e+07	8.73988e+06	1.29032e+07	1.22207e+07	1.15903e+07	8.5987e+06	1.76254e+07	1.06116e+07	18	17	18	18	19	17	19	17	15	15	20	16	15	14	15	15	16	14	16	14	12	12	17	13
Q62318	21849	Trim28	FALSE	Transcription intermediary factor 1-beta OS=Mus musculus OX=10090 GN=Trim28 PE=1 SV=3	39	16	194	16	90.695	615.15	16	88.8	2.37252e+07	5.74805e+07	3.62524e+07	3.62524e+07	2.71914e+07	4.74065e+07	2.54612e+07	3.46607e+07	3.57868e+07	3.11783e+07	3.81257e+07	4.62879e+07	3.94834e+07	15	13	13	13	14	13	16	16	12	14	14	15	15	13	13	13	14	13	16	16	12	14	14	15
Q99MR6	83701	Srrt	FALSE	Serrate RNA effector molecule homolog OS=Mus musculus OX=10090 GN=Srrt PE=1 SV=1	23	16	194	16	69.577	486.98	16	100.4	6.09586e+07	1.1838e+08	1.599e+08	1.599e+08	6.38923e+07	8.8727e+07	6.74413e+07	8.40159e+07	1.02917e+08	1.28511e+08	6.01871e+07	7.95428e+07	6.20863e+07	15	14	13	16	15	16	14	15	16	15	15	15	15	14	13	16	15	16	14	15	16	15	15	15
Q8CGK3	74142	Lonp1	TRUE	Lon protease homolog, mitochondrial OS=Mus musculus OX=10090 GN=Lonp1 PE=1 SV=2	38	23	194	23	107.211	552.06	23	105.8	1.81665e+07	2.95194e+07	1.4287e+07	1.4287e+07	1.35315e+07	2.003e+07	2.04932e+07	1.88811e+07	1.64665e+07	4.51003e+07	2.47692e+07	2.3114e+07	1.94605e+07	20	19	14	17	17	21	19	16	22	20	17	18	20	19	14	17	17	21	19	16	22	20	17	18
Q61545	14030	Ewsr1	FALSE	RNA-binding protein EWS OS=Mus musculus OX=10090 GN=Ewsr1 PE=1 SV=2	17	9	194	9	70.729	565.74	9	68.4	3.78501e+07	5.87999e+07	5.48501e+07	5.48501e+07	4.17351e+07	5.1942e+07	3.75604e+07	5.21076e+07	5.43507e+07	4.69997e+07	5.04434e+07	6.24768e+07	5.80255e+07	8	8	8	8	8	8	7	9	9	9	9	8	8	8	8	8	8	8	7	9	9	9	9	8
Q62167	13205	Ddx3x	FALSE	ATP-dependent RNA helicase DDX3X OS=Mus musculus OX=10090 GN=Ddx3x PE=1 SV=3	29	16	194	7	68.741	503.76	16	73.1	2.39181e+07	6.50442e+07	4.07652e+07	4.07652e+07	3.42168e+07	4.25716e+07	3.11833e+07	4.70448e+07	5.19306e+07	2.69167e+07	3.01959e+07	5.73407e+07	4.28932e+07	14	16	15	13	14	14	13	15	13	14	15	14	6	7	7	7	7	7	6	7	6	7	7	7
P26645	17118	Marcks	FALSE	Myristoylated alanine-rich C-kinase substrate OS=Mus musculus OX=10090 GN=Marcks PE=1 SV=2	67	15	194	15	95.991	688.5	15	29.6	1.64405e+07	3.05143e+07	3.35915e+07	3.35915e+07	2.52846e+07	2.73588e+07	1.47022e+07	2.81135e+07	3.75434e+07	2.14585e+07	2.74168e+07	3.53593e+07	3.88641e+07	10	11	14	11	9	10	13	13	11	12	13	12	10	11	14	11	9	10	13	13	11	12	13	12
Q8K3K8	71648	Optn	FALSE	Optineurin OS=Mus musculus OX=10090 GN=Optn PE=1 SV=1	38	21	193	21	86.928	430.7	21	67	8.82571e+06	1.36834e+07	2.04755e+07	2.04755e+07	8.13529e+06	9.27846e+06	7.36486e+06	1.43057e+07	1.20247e+07	1.6185e+07	9.24323e+06	8.60245e+06	1.25973e+07	21	18	21	19	17	17	21	19	19	19	19	20	21	18	21	19	17	17	21	19	19	19	19	20
Q03734	20717	Serpina3m	FALSE	Serine protease inhibitor A3M OS=Mus musculus OX=10090 GN=Serpina3m PE=1 SV=2	36	13	193	6	59.881	558.07	13	47	1.27464e+07	1.1931e+07	1.8131e+07	1.8131e+07	9.11303e+06	1.46427e+07	7.44676e+06	1.05184e+07	1.0863e+07	1.10933e+07	1.3122e+07	1.55053e+07	1.27334e+07	12	12	12	12	13	12	12	12	12	13	13	13	5	5	5	6	6	6	5	5	5	6	6	6
Q91XF0	103711	Pnpo	TRUE	Pyridoxine-5'-phosphate oxidase OS=Mus musculus OX=10090 GN=Pnpo PE=1 SV=1	44	12	193	12	84.781	526.11	12	30.1	1.73628e+08	3.05225e+08	1.52253e+08	1.52253e+08	1.47806e+08	2.13803e+08	1.65631e+08	1.32899e+08	1.59601e+08	2.75333e+08	2.07102e+08	1.32371e+08	1.91944e+08	12	10	11	11	11	11	10	12	11	12	11	12	12	10	11	11	11	11	10	12	11	12	11	12
O55111	13511	Dsg2	FALSE	Desmoglein-2 OS=Mus musculus OX=10090 GN=Dsg2 PE=1 SV=3	30	22	193	22	128.522	602.92	22	122.3	1.90784e+07	2.93469e+07	2.9181e+07	2.9181e+07	2.44739e+07	2.89881e+07	1.93762e+07	2.88591e+07	2.73116e+07	1.9765e+07	2.51071e+07	4.01083e+07	3.66503e+07	19	20	17	20	19	20	21	20	16	21	20	19	19	20	17	20	19	20	21	20	16	21	20	19
Q91WK5	68133	Gcsh	TRUE	Glycine cleavage system H protein, mitochondrial OS=Mus musculus OX=10090 GN=Gcsh PE=1 SV=2	64	5	192	5	44.172	599.03	5	18.6	2.43218e+07	4.78464e+07	4.3548e+07	4.3548e+07	2.97511e+07	5.16648e+07	2.82553e+07	4.6052e+07	7.31481e+07	6.29222e+07	3.81409e+07	8.4498e+07	5.6597e+07	4	4	3	3	4	3	4	4	3	3	5	5	4	4	3	3	4	3	4	4	3	3	5	5
Q9CRD0	68095	Ociad1	TRUE	OCIA domain-containing protein 1 OS=Mus musculus OX=10090 GN=Ociad1 PE=1 SV=1	61	11	192	11	72.013	529.65	11	27.6	2.78032e+07	5.2044e+07	2.86572e+07	2.86572e+07	3.21675e+07	5.18179e+07	3.14568e+07	2.44315e+07	2.90431e+07	77088291	4.76844e+07	2.50063e+07	3.98029e+07	11	11	10	11	11	10	10	11	10	11	10	11	11	11	10	11	11	10	10	11	10	11	10	11
P11087	12842	Col1a1	FALSE	Collagen alpha-1(I) chain OS=Mus musculus OX=10090 GN=Col1a1 PE=1 SV=4	14	15	192	15	61.165	453.93	15	137.9	2.2042e+07	4.49689e+07	8.27851e+07	8.27851e+07	4.37361e+07	3.40595e+07	3.02619e+07	6.58574e+07	4.4634e+07	4.85819e+07	3.38105e+07	5.47271e+07	5.32013e+07	13	12	13	12	12	12	13	13	12	13	12	13	13	12	13	12	12	12	13	13	12	13	12	13
Q8BYU6	240832	Tor1aip2	FALSE	Torsin-1A-interacting protein 2 OS=Mus musculus OX=10090 GN=Tor1aip2 PE=1 SV=1	61	20	192	20	116.152	624.22	20	54.5	1.93431e+07	2.15496e+07	1.08879e+07	1.08879e+07	1.83799e+07	1.82516e+07	1.80488e+07	9.5487e+06	1.2318e+07	2.83674e+07	2.08881e+07	6.55606e+06	1.90808e+07	19	17	16	18	17	17	17	18	17	19	17	18	19	17	16	18	17	17	17	18	17	19	17	18
Q99K51	102866	Pls3	FALSE	Plastin-3 OS=Mus musculus OX=10090 GN=Pls3 PE=1 SV=3	46	25	192	20	112.367	531.71	25	70.7	1.05693e+07	2.5817e+07	9.1386e+06	9.1386e+06	1.1261e+07	1.69918e+07	2.20713e+07	1.14033e+07	1.29488e+07	2.35823e+07	1.76813e+07	2.68235e+07	1.60675e+07	22	18	13	19	19	25	16	16	24	23	16	16	17	14	10	14	15	20	11	11	19	18	12	11
Q9DAW9	71994	Cnn3	FALSE	Calponin-3 OS=Mus musculus OX=10090 GN=Cnn3 PE=1 SV=1	60	13	191	12	89.49	600.71	13	36.4	2.27502e+07	3.85185e+07	2.9665e+07	2.9665e+07	3.08393e+07	4.41956e+07	3.25279e+07	2.49769e+07	2.75728e+07	4.92168e+07	4.29268e+07	3.11576e+07	4.14438e+07	12	12	12	13	13	12	13	13	12	12	13	12	11	11	11	12	12	11	12	12	11	11	12	11
P51885	17022	Lum	FALSE	Lumican OS=Mus musculus OX=10090 GN=Lum PE=1 SV=2	43	13	191	13	64.452	525.84	13	38.2	4.20426e+07	9.16373e+07	1.28027e+08	1.28027e+08	7.888e+07	1.17214e+08	7.90922e+07	7.3932e+07	7.42143e+07	1.37178e+08	1.18011e+08	83865462	1.37103e+08	12	12	13	13	12	13	12	13	13	13	13	12	12	12	13	13	12	13	12	13	13	13	13	12
Q8VC30	225913	Tkfc	FALSE	Triokinase/FMN cyclase OS=Mus musculus OX=10090 GN=Tkfc PE=1 SV=1	40	14	190	14	89.15	516.89	14	59.7	2.35532e+07	5.47527e+07	5.69451e+07	5.69451e+07	3.84816e+07	4.55274e+07	2.30152e+07	3.00435e+07	4.38483e+07	3.60189e+07	3.22286e+07	4.11969e+07	3.51548e+07	11	12	12	13	13	12	10	11	11	10	10	11	11	12	12	13	13	12	10	11	11	10	10	11
P55937	269682	Golga3	FALSE	Golgin subfamily A member 3 OS=Mus musculus OX=10090 GN=Golga3 PE=1 SV=3	28	30	190	30	132.286	568.49	30	167.1	9.63666e+06	1.63246e+07	1.79319e+07	1.79319e+07	1.05815e+07	1.50584e+07	1.08076e+07	8.61891e+06	9.96315e+06	1.6098e+07	1.13811e+07	6.10507e+06	1.18104e+07	25	27	25	26	28	25	23	26	28	27	18	29	25	27	25	26	28	25	23	26	28	27	18	29
Q62393	21985	Tpd52	FALSE	Tumor protein D52 OS=Mus musculus OX=10090 GN=Tpd52 PE=1 SV=2	44	10	190	10	71.934	646.3	10	24.3	4.37045e+07	8.72828e+07	8.78378e+07	8.78378e+07	5.25606e+07	6.52471e+07	3.51838e+07	7.10925e+07	8.96622e+07	7.33877e+07	5.54225e+07	7.81489e+07	7.59913e+07	10	10	10	10	10	9	10	10	10	10	10	10	10	10	10	10	10	9	10	10	10	10	10	10
Q3UHX2	231887	Pdap1	FALSE	28 kDa heat- and acid-stable phosphoprotein OS=Mus musculus OX=10090 GN=Pdap1 PE=1 SV=1	59	15	190	15	63.031	565.54	15	20.6	4.80577e+07	1.03518e+08	1.07725e+08	1.07725e+08	6.76787e+07	7.3707e+07	4.9186e+07	9.28955e+07	9.62525e+07	8.33111e+07	7.12051e+07	9.38512e+07	8.77246e+07	13	13	13	14	13	13	13	14	14	12	12	14	13	13	13	14	13	13	13	14	14	12	12	14
Q61112	20318	Sdf4	FALSE	45 kDa calcium-binding protein OS=Mus musculus OX=10090 GN=Sdf4 PE=1 SV=1	44	13	188	13	72.587	486.95	13	42	1.64398e+07	2.90501e+07	3.39125e+07	3.39125e+07	1.7966e+07	2.16359e+07	1.49687e+07	2.44918e+07	2.24956e+07	1.99293e+07	2.38244e+07	3.12536e+07	2.69954e+07	12	13	12	12	12	13	13	13	12	13	13	13	12	13	12	12	12	13	13	13	12	13	13	13
P62334	67089	Psmc6	FALSE	26S proteasome regulatory subunit 10B OS=Mus musculus OX=10090 GN=Psmc6 PE=1 SV=1	59	19	188	19	101.509	505.26	19	44.1	1.98237e+07	2.87437e+07	7.50467e+06	7.50467e+06	1.94875e+07	3.56949e+07	3.28177e+07	7.40686e+06	7.49371e+06	5.6414e+07	3.58824e+07	5.2336e+06	1.55499e+07	19	19	17	19	19	19	16	16	19	19	13	18	19	19	17	19	19	19	16	16	19	19	13	18
Q8BI72	70925	Cdkn2aip	FALSE	CDKN2A-interacting protein OS=Mus musculus OX=10090 GN=Cdkn2aip PE=1 SV=1	47	19	187	19	86.154	456.42	19	59.7	9.65504e+06	1.59813e+07	1.68737e+07	1.68737e+07	1.27124e+07	1.9801e+07	1.05801e+07	1.42419e+07	1.49886e+07	1.17228e+07	1.4975e+07	1.6445e+07	1.65112e+07	18	19	16	18	17	17	18	18	17	16	19	18	18	19	16	18	17	17	18	18	17	16	19	18
Q9JKS5	56541	Habp4	FALSE	Intracellular hyaluronan-binding protein 4 OS=Mus musculus OX=10090 GN=Habp4 PE=1 SV=2	50	18	186	18	99.826	444.79	18	45.9	2.26633e+07	3.31929e+07	4.62686e+07	4.62686e+07	1.46545e+07	2.34097e+07	1.79818e+07	2.95005e+07	3.15681e+07	2.88868e+07	1.84895e+07	2.31962e+07	2.91212e+07	17	18	16	17	16	18	17	17	17	17	16	17	17	18	16	17	16	18	17	17	17	17	16	17
Q62446	30795	Fkbp3	FALSE	Peptidyl-prolyl cis-trans isomerase FKBP3 OS=Mus musculus OX=10090 GN=Fkbp3 PE=1 SV=2	60	12	186	12	68.203	501.14	12	25.1	8.82425e+07	1.56593e+08	1.18612e+08	1.18612e+08	9.11938e+07	1.21856e+08	7.74329e+07	1.27927e+08	1.21126e+08	1.56769e+08	1.20601e+08	1.21595e+08	1.19517e+08	12	12	12	12	12	12	11	12	12	12	12	12	12	12	12	12	12	12	11	12	12	12	12	12
Q9CR41	67693	Hypk	FALSE	Huntingtin-interacting protein K OS=Mus musculus OX=10090 GN=Hypk PE=1 SV=2	52	10	186	10	70.501	531.65	10	14.7	2.7591e+07	4.89664e+07	5.66492e+07	5.66492e+07	2.90327e+07	3.1051e+07	1.92845e+07	4.07729e+07	4.55444e+07	3.39897e+07	2.57047e+07	4.60824e+07	3.15161e+07	9	10	10	10	10	10	9	10	10	9	9	10	9	10	10	10	10	10	9	10	10	9	9	10
P15626	14863	Gstm2	FALSE	Glutathione S-transferase Mu 2 OS=Mus musculus OX=10090 GN=Gstm2 PE=1 SV=2	72	18	186	10	82.439	516.97	18	25.7	6.50712e+07	8.51392e+07	6.12188e+07	6.12188e+07	1.07691e+08	1.74094e+08	1.51514e+08	3.52997e+07	6.11497e+07	1.5955e+08	1.50674e+08	3.73922e+07	9.83023e+07	15	15	12	17	17	18	11	14	17	18	12	15	8	9	7	10	10	10	6	7	10	10	6	8
Q9D819	67895	Ppa1	FALSE	Inorganic pyrophosphatase OS=Mus musculus OX=10090 GN=Ppa1 PE=1 SV=1	56	16	186	16	91.235	465.65	16	32.6	8.68951e+07	1.54045e+08	3.29465e+07	3.29465e+07	4.87652e+07	9.70822e+07	8.48775e+07	5.49379e+07	3.24289e+07	158669325	9.19559e+07	1.33081e+07	3.9783e+07	15	15	13	15	16	15	13	14	16	15	12	15	15	15	13	15	16	15	13	14	16	15	12	15
P99028	66576	Uqcrh	TRUE	Cytochrome b-c1 complex subunit 6, mitochondrial OS=Mus musculus OX=10090 GN=Uqcrh PE=1 SV=2	75	8	184	8	45.577	560.92	8	10.4	8.08036e+07	1.8208e+08	1.89351e+08	1.89351e+08	1.0383e+08	1.12771e+08	7.18409e+07	1.88199e+08	2.34488e+08	2.99046e+08	1.42216e+08	2.78012e+08	1.74287e+08	7	8	8	8	8	7	8	8	8	8	7	8	7	8	8	8	8	7	8	8	8	8	7	8
Q3UQN2	218503	Fcho2	FALSE	F-BAR domain only protein 2 OS=Mus musculus OX=10090 GN=Fcho2 PE=1 SV=1	30	19	184	19	76.934	512.68	19	88.7	1.72226e+07	2.90403e+07	2.49163e+07	2.49163e+07	1.65142e+07	2.29897e+07	1.56845e+07	2.46277e+07	2.73107e+07	2.03227e+07	1.89485e+07	2.74443e+07	2.09782e+07	16	18	19	18	18	17	18	18	16	18	19	18	16	18	19	18	18	17	18	18	16	18	19	18
Q99LP6	17713	Grpel1	TRUE	GrpE protein homolog 1, mitochondrial OS=Mus musculus OX=10090 GN=Grpel1 PE=1 SV=1	64	13	183	13	65.217	468.63	13	24.3	1.02487e+08	1.57861e+08	1.06806e+08	1.06806e+08	9.73602e+07	1.37429e+08	8.37378e+07	1.17889e+08	1.14356e+08	2.77292e+08	1.55846e+08	1.03295e+08	119116636	13	12	11	13	13	13	11	13	13	13	12	13	13	12	11	13	13	13	11	13	13	13	12	13
Q9QYI4	56709	Dnajb12	FALSE	DnaJ homolog subfamily B member 12 OS=Mus musculus OX=10090 GN=Dnajb12 PE=1 SV=2	48	15	183	15	68.628	418.71	15	42	1.15032e+07	2.22846e+07	1.22095e+07	1.22095e+07	1.23901e+07	1.54786e+07	1.30455e+07	9.01035e+06	9.59111e+06	3.04094e+07	1.66529e+07	9.14155e+06	1.47945e+07	15	13	13	14	13	15	15	14	15	15	14	13	15	13	13	14	13	15	15	14	15	15	14	13
Q9QY76	56491	Vapb	FALSE	Vesicle-associated membrane protein-associated protein B OS=Mus musculus OX=10090 GN=Vapb PE=1 SV=3	51	13	183	12	78.722	490.88	13	26.9	7.81227e+07	1.25248e+08	6.51718e+07	6.51718e+07	1.00456e+08	1.09827e+08	8.67652e+07	6.76644e+07	7.07086e+07	1.39961e+08	1.20054e+08	6.80417e+07	9.75739e+07	13	13	13	13	13	13	12	12	13	13	13	12	12	12	12	12	12	12	11	11	12	12	12	11
Q60953	18854	Pml	FALSE	Protein PML OS=Mus musculus OX=10090 GN=Pml PE=1 SV=3	30	19	183	19	95.58	535.68	19	98.2	9.22475e+06	1.53481e+07	1.17685e+07	1.17685e+07	1.19391e+07	1.71457e+07	8.97617e+06	9.83793e+06	1.64905e+07	1.05011e+07	1.38382e+07	1.35041e+07	1.50767e+07	17	15	16	18	18	17	17	19	14	16	19	17	17	15	16	18	18	17	17	19	14	16	19	17
Q0P678	76014	Zc3h18	FALSE	Zinc finger CCCH domain-containing protein 18 OS=Mus musculus OX=10090 GN=Zc3h18 PE=1 SV=1	33	20	183	20	96.928	512.34	20	105.6	1.26962e+07	1.93553e+07	2.21605e+07	2.21605e+07	8.67368e+06	2.14004e+07	1.00719e+07	1.6472e+07	1.64814e+07	1.80548e+07	1.50369e+07	1.51754e+07	1.01144e+07	19	19	20	18	19	18	20	20	17	18	20	17	19	19	20	18	19	18	20	20	17	18	20	17
Q8R4U7	269593	Luzp1	FALSE	Leucine zipper protein 1 OS=Mus musculus OX=10090 GN=Luzp1 PE=1 SV=2	32	26	182	26	103.151	496.96	26	119.2	7.64675e+06	1.26666e+07	1.3279e+07	1.3279e+07	8.43473e+06	1.07844e+07	6.14497e+06	1.12671e+07	1.34005e+07	9.76964e+06	1.0334e+07	1.25371e+07	1.17079e+07	21	21	23	22	21	19	26	24	22	22	25	23	21	21	23	22	21	19	26	24	22	22	25	23
O88735	17761	Map7	FALSE	Ensconsin OS=Mus musculus OX=10090 GN=Map7 PE=1 SV=1	31	17	182	16	64.681	484.98	17	82	2.0949e+07	3.23124e+07	4.03757e+07	4.03757e+07	2.3514e+07	2.71805e+07	1.68078e+07	2.81394e+07	3.53264e+07	3.78664e+07	2.27963e+07	3.27066e+07	2.8835e+07	17	16	16	16	16	16	17	17	16	16	17	16	16	15	15	15	15	15	16	16	15	15	16	15
Q9Z1P6	66416	Ndufa7	TRUE	NADH dehydrogenase [ubiquinone] 1 alpha subcomplex subunit 7 OS=Mus musculus OX=10090 GN=Ndufa7 PE=1 SV=3	57	8	182	8	39.289	466.69	8	12.6	4.68545e+07	9.16372e+07	1.02103e+08	1.02103e+08	4.93767e+07	7.47496e+07	5.03459e+07	3.06996e+07	3.60005e+07	1.88987e+07	3.93382e+07	1.12082e+07	5.28076e+07	8	8	8	8	8	8	8	8	8	8	8	8	8	8	8	8	8	8	8	8	8	8	8	8
Q60936	67426	Coq8a	TRUE	Atypical kinase COQ8A, mitochondrial OS=Mus musculus OX=10090 GN=Coq8a PE=1 SV=2	19	7	182	7	51.716	634.83	7	71.7	3.87937e+07	5.96533e+07	6.82981e+07	6.82981e+07	4.07515e+07	3.91567e+07	4.18934e+07	3.15189e+07	3.83075e+07	4.07873e+07	3.9769e+07	2.71131e+07	5.82893e+07	6	6	6	6	6	6	6	6	6	6	7	6	6	6	6	6	6	6	6	6	6	6	7	6
O54724	19285	Cavin1	FALSE	Caveolae-associated protein 1 OS=Mus musculus OX=10090 GN=Cavin1 PE=1 SV=1	46	14	181	14	73.922	574.5	14	43.9	1.50053e+07	2.40597e+07	4.01801e+07	4.01801e+07	2.03439e+07	2.62279e+07	1.84076e+07	1.63219e+07	2.51106e+07	6.66374e+07	2.9281e+07	2.14921e+07	1.95185e+07	12	13	14	13	13	13	13	14	14	13	14	14	12	13	14	13	13	13	13	14	14	13	14	14
Q70FJ1	100986	Akap9	FALSE	A-kinase anchor protein 9 OS=Mus musculus OX=10090 GN=Akap9 PE=1 SV=2	13	36	181	36	131.366	481.2	36	435.9	9.15444e+06	1.55435e+07	1.07884e+07	1.07884e+07	8.89492e+06	1.48678e+07	8.36708e+06	1.07181e+07	9.09421e+06	9.33152e+06	9.8609e+06	1.51728e+07	9.64318e+06	27	28	25	30	29	26	24	26	19	25	31	28	27	28	25	30	29	26	24	26	19	25	31	28
Q8BFR4	75612	Gns	FALSE	N-acetylglucosamine-6-sulfatase OS=Mus musculus OX=10090 GN=Gns PE=1 SV=1	22	12	181	12	57.75	472.47	12	61.1	3.18976e+07	4.45763e+07	4.01458e+07	4.01458e+07	2.7902e+07	4.75887e+07	2.19591e+07	3.07213e+07	3.66945e+07	3.42859e+07	3.63156e+07	2.67653e+07	3.46459e+07	12	12	12	12	12	12	12	12	12	12	12	12	12	12	12	12	12	12	12	12	12	12	12	12
Q9D824	66899	Fip1l1	FALSE	Pre-mRNA 3'-end-processing factor FIP1 OS=Mus musculus OX=10090 GN=Fip1l1 PE=1 SV=1	51	16	181	16	78.224	556.05	16	64.9	1.00997e+07	1.46941e+07	1.90104e+07	1.90104e+07	1.15179e+07	1.35369e+07	9.61149e+06	1.4326e+07	1.57831e+07	1.45313e+07	1.28234e+07	1.44295e+07	1.72608e+07	13	12	14	13	13	12	15	13	13	12	14	14	13	12	14	13	13	12	15	13	13	12	14	14
P11352	14775	Gpx1	TRUE	Glutathione peroxidase 1 OS=Mus musculus OX=10090 GN=Gpx1 PE=1 SV=2	65	12	181	12	50.008	437.35	12	22.3	8.33942e+07	1.41922e+08	6.72336e+07	6.72336e+07	1.07236e+08	2.32649e+08	1.62938e+08	5.42836e+07	6.12545e+07	2.04726e+08	1.87528e+08	7.10688e+07	1.20029e+08	12	12	11	12	12	12	11	12	12	12	10	12	12	12	11	12	12	12	11	12	12	12	10	12
Q7TPR4	109711	Actn1	FALSE	Alpha-actinin-1 OS=Mus musculus OX=10090 GN=Actn1 PE=1 SV=1	31	23	181	8	100.939	502.76	23	103	1.51147e+06	3.53162e+06	1.18311e+06	1.18311e+06	1.7459e+06	4.15253e+06	3.08819e+06	1.20798e+06	1.1423e+06	4.20968e+06	2.44049e+06	1.08299e+06	2.17224e+06	19	19	16	20	23	22	18	17	20	19	16	18	6	6	5	6	8	8	6	5	5	5	5	5
O35226	19185	Psmd4	FALSE	26S proteasome non-ATPase regulatory subunit 4 OS=Mus musculus OX=10090 GN=Psmd4 PE=1 SV=1	40	14	180	14	61.217	493.62	14	40.7	2.87111e+07	5.40412e+07	3.62519e+07	3.62519e+07	27675172	4.00773e+07	2.99705e+07	2.46401e+07	2.50502e+07	4.82944e+07	3.1852e+07	2.1698e+07	3.41249e+07	13	12	10	11	13	10	11	11	12	11	8	12	13	12	10	11	13	10	11	11	12	11	8	12
Q8C8U0	67533	Ppfibp1	FALSE	Liprin-beta-1 OS=Mus musculus OX=10090 GN=Ppfibp1 PE=1 SV=3	30	22	180	22	98.027	465.91	22	108.5	8.77336e+06	1.3932e+07	9.18637e+06	9.18637e+06	8.38735e+06	1.14814e+07	6.72003e+06	9.91028e+06	9.6808e+06	8.75016e+06	9.43698e+06	1.20283e+07	1.01438e+07	20	20	18	20	18	18	20	19	15	18	19	18	20	20	18	20	18	18	20	19	15	18	19	18
P70297	20844	Stam	FALSE	Signal transducing adapter molecule 1 OS=Mus musculus OX=10090 GN=Stam PE=1 SV=3	36	13	179	12	73.671	521.38	13	59.7	1.27108e+07	2.05261e+07	1.78815e+07	1.78815e+07	1.25788e+07	1.82304e+07	1.13285e+07	1.69062e+07	1.49181e+07	1.85802e+07	1.65495e+07	2.01888e+07	1.88025e+07	12	11	12	11	11	11	12	11	12	12	12	11	11	10	11	10	10	10	11	10	11	11	11	10
Q61316	15525	Hspa4	FALSE	Heat shock 70 kDa protein 4 OS=Mus musculus OX=10090 GN=Hspa4 PE=1 SV=1	23	16	179	16	72.572	472.46	16	94.1	2.46007e+07	3.79466e+07	3.44265e+07	3.44265e+07	2.27087e+07	2.78638e+07	2.4339e+07	2.88588e+07	2.99829e+07	2.94798e+07	2.4661e+07	2.71227e+07	2.85507e+07	15	15	15	15	14	13	15	16	14	14	16	14	15	15	15	15	14	13	15	16	14	14	16	14
Q01279	13649	Egfr	FALSE	Epidermal growth factor receptor OS=Mus musculus OX=10090 GN=Egfr PE=1 SV=1	24	21	179	21	119.93	553.8	21	134.8	5.88277e+07	7.97993e+07	8.63435e+07	8.63435e+07	2.21895e+07	4.98737e+07	1.20095e+07	5.1452e+07	6.36028e+07	5.12916e+07	4.11459e+07	2.35363e+07	2.62836e+07	17	17	18	16	17	14	17	17	20	18	14	16	17	17	18	16	17	14	17	17	20	18	14	16
P18572	12215	Bsg	FALSE	Basigin OS=Mus musculus OX=10090 GN=Bsg PE=1 SV=2	29	11	179	11	66.297	504.1	11	42.4	1.95883e+08	2.77959e+08	3.08734e+08	3.08734e+08	2.62346e+08	3.41876e+08	1.9257e+08	2.18116e+08	2.39347e+08	2.74395e+08	2.82563e+08	2.74936e+08	3.00247e+08	10	10	11	10	11	10	10	10	10	10	10	10	10	10	11	10	11	10	10	10	10	10	10	10
P28665	17836	Mug1	FALSE	Murinoglobulin-1 OS=Mus musculus OX=10090 GN=Mug1 PE=1 SV=3	19	19	179	19	98.585	497.1	19	165.2	1.71529e+07	4.03605e+07	3.22405e+07	3.22405e+07	9.84958e+06	2.0298e+07	1.03028e+07	1.40343e+07	1.91519e+07	3.08278e+07	1.93601e+07	1.01141e+07	1.53156e+07	16	15	14	14	13	13	14	14	18	15	11	13	16	15	14	14	13	13	14	14	18	15	11	13
A2A7S8	97130	C77080	FALSE	Uncharacterized protein KIAA1522 OS=Mus musculus OX=10090 GN=Kiaa1522 PE=1 SV=1	35	22	179	22	110.861	548.06	22	104.8	6.45773e+06	1.13225e+07	1.5569e+07	1.5569e+07	9.40016e+06	8.98632e+06	6.86877e+06	1.14498e+07	1.52086e+07	9.04431e+06	9.78264e+06	1.39669e+07	1.1465e+07	16	18	19	19	15	18	20	19	17	18	18	18	16	18	19	19	15	18	20	19	17	18	18	18
P23116	13669	Eif3a	FALSE	Eukaryotic translation initiation factor 3 subunit A OS=Mus musculus OX=10090 GN=Eif3a PE=1 SV=5	13	24	178	24	77.283	374.97	24	161.8	7.93478e+06	2.59844e+07	1.02456e+07	1.02456e+07	1.06697e+07	1.40378e+07	9.61257e+06	1.66058e+07	1.58259e+07	8.16696e+06	1.12677e+07	1.916e+07	1.40003e+07	22	22	18	24	22	21	19	23	20	21	23	23	22	22	18	24	22	21	19	23	20	21	23	23
P97379	23881	G3bp2	FALSE	Ras GTPase-activating protein-binding protein 2 OS=Mus musculus OX=10090 GN=G3bp2 PE=1 SV=2	36	13	178	12	79.963	491.93	13	54.1	2.32623e+07	5.65318e+07	2.34583e+07	2.34583e+07	2.0056e+07	2.66987e+07	1.93186e+07	2.97961e+07	2.81359e+07	2.44303e+07	2.37986e+07	2.59275e+07	2.17563e+07	13	13	12	13	13	13	13	13	12	13	13	12	12	12	11	12	12	12	12	12	11	12	12	11
O35387	23897	Hax1	FALSE	HCLS1-associated protein X-1 OS=Mus musculus OX=10090 GN=Hax1 PE=1 SV=1	79	17	178	17	95.352	518.65	17	31.6	2.09944e+07	2.76289e+07	2.34152e+07	2.34152e+07	1.68892e+07	2.53253e+07	1.81953e+07	2.33409e+07	2.23393e+07	3.90047e+07	3.00474e+07	2.79877e+07	2.92434e+07	14	15	12	14	14	14	15	14	14	14	14	14	14	15	12	14	14	14	15	14	14	14	14	14
O08583	21681	Alyref	FALSE	THO complex subunit 4 OS=Mus musculus OX=10090 GN=Alyref PE=1 SV=3	55	11	178	7	61.978	453.11	11	26.9	4.09466e+07	8.36808e+07	6.81115e+07	6.81115e+07	4.56767e+07	7.11443e+07	5.00302e+07	4.96722e+07	4.9675e+07	7.23118e+07	6.37538e+07	5.36094e+07	6.05762e+07	11	11	10	11	11	11	10	10	11	10	10	11	7	7	6	7	7	7	6	6	7	6	6	7
Q9D287	68183	Bcas2	FALSE	Pre-mRNA-splicing factor SPF27 OS=Mus musculus OX=10090 GN=Bcas2 PE=1 SV=1	68	14	178	14	77.757	515.06	14	26.1	1.66501e+07	2.96662e+07	2.32558e+07	2.32558e+07	1.77477e+07	2.37466e+07	1.52877e+07	1.64357e+07	1.99822e+07	2.10113e+07	2.38741e+07	2.06661e+07	2.57642e+07	14	14	13	13	13	13	13	13	12	13	14	13	14	14	13	13	13	13	13	13	12	13	14	13
P56391	110323	Cox6b1	TRUE	Cytochrome c oxidase subunit 6B1 OS=Mus musculus OX=10090 GN=Cox6b1 PE=1 SV=2	63	6	177	6	22.91	455.1	6	10.1	1.87354e+08	3.44501e+08	2.37259e+08	2.37259e+08	1.92833e+08	2.88702e+08	2.09607e+08	3.0634e+08	2.97835e+08	5.87115e+08	3.17504e+08	3.62673e+08	2.98991e+08	6	6	6	6	6	6	6	6	6	6	6	6	6	6	6	6	6	6	6	6	6	6	6	6
Q80Y55	100383	Bsdc1	FALSE	BSD domain-containing protein 1 OS=Mus musculus OX=10090 GN=Bsdc1 PE=1 SV=1	55	15	177	15	81.472	555.48	15	46.9	2.11893e+07	3.12806e+07	3.644e+07	3.644e+07	2.18283e+07	3.08196e+07	1.83893e+07	2.86862e+07	3.32177e+07	3.65265e+07	2.57834e+07	4.0086e+07	2.73622e+07	13	14	14	13	12	12	14	15	13	14	15	15	13	14	14	13	12	12	14	15	13	14	15	15
Q8K1N2	208177	Phldb2	FALSE	Pleckstrin homology-like domain family B member 2 OS=Mus musculus OX=10090 GN=Phldb2 PE=1 SV=2	23	25	176	25	91.284	434.97	25	141.4	3.20205e+07	6.17242e+07	4.2589e+07	4.2589e+07	3.79895e+07	5.10974e+07	3.51382e+07	3.72893e+07	3.50597e+07	5.11702e+07	4.72497e+07	4.18346e+07	5.06852e+07	21	22	20	21	21	20	23	20	22	22	23	23	21	22	20	21	21	20	23	20	22	22	23	23
P35700	18477	Prdx1	FALSE	Peroxiredoxin-1 OS=Mus musculus OX=10090 GN=Prdx1 PE=1 SV=1	61	12	175	12	52.644	421.69	12	22.2	5.46096e+07	9.71454e+07	4.80333e+07	4.80333e+07	7.25476e+07	1.5672e+08	1.04945e+08	3.56252e+07	4.16049e+07	1.64472e+08	1.0937e+08	3.95308e+07	6.69033e+07	12	12	12	12	12	12	12	12	12	12	12	12	12	12	12	12	12	12	12	12	12	12	12	12
Q9ERU9	19386	Ranbp2	FALSE	E3 SUMO-protein ligase RanBP2 OS=Mus musculus OX=10090 GN=Ranbp2 PE=1 SV=2	12	27	175	27	105.445	483.7	27	340.9	7.91343e+06	2.03909e+07	5.44822e+06	5.44822e+06	6.19405e+06	1.38209e+07	6.42965e+06	8.26373e+06	7.02479e+06	4.72011e+06	7.6457e+06	1.09868e+07	9.46505e+06	23	24	15	22	22	20	22	23	17	21	23	24	23	24	15	22	22	20	22	23	17	21	23	24
P42567	13858	Eps15	FALSE	Epidermal growth factor receptor substrate 15 OS=Mus musculus OX=10090 GN=Eps15 PE=1 SV=1	44	23	175	23	111.008	511.1	23	98.4	1.01919e+07	1.66518e+07	1.454e+07	1.454e+07	1.13782e+07	1.84836e+07	1.01272e+07	1.15371e+07	1.29096e+07	1.46863e+07	1.4821e+07	1.68003e+07	1.52661e+07	18	20	15	18	21	18	15	17	17	21	19	20	18	20	15	18	21	18	15	17	17	21	19	20
Q61696	193740	Hspa1a	FALSE	Heat shock 70 kDa protein 1A OS=Mus musculus OX=10090 GN=Hspa1a PE=1 SV=2	43	19	174	15	86.54	489.94	19	70	6.70632e+06	9.24588e+06	3.22809e+06	3.22809e+06	4.45534e+06	8.84049e+06	1.07397e+07	2.4591e+06	2.5877e+06	1.29593e+07	6.84349e+06	1.25741e+06	4.7087e+06	17	17	14	15	17	19	14	13	18	17	12	16	13	13	10	11	13	15	10	9	14	13	8	12
P62748	53602	Hpcal1	FALSE	Hippocalcin-like protein 1 OS=Mus musculus OX=10090 GN=Hpcal1 PE=1 SV=2	59	11	174	7	57.792	451.1	11	22.3	1.81043e+07	4.03496e+07	3.13938e+07	3.13938e+07	2.97524e+07	4.27979e+07	2.72476e+07	1.89295e+07	2.77964e+07	3.31633e+07	3.50147e+07	2.67484e+07	4.40488e+07	9	10	10	11	11	11	10	11	11	10	11	11	6	6	6	7	7	7	7	7	7	7	7	7
P62869	67673	Elob	FALSE	Elongin-B OS=Mus musculus OX=10090 GN=Elob PE=1 SV=1	66	8	173	8	35.165	430.49	8	13.2	3.37017e+07	5.50876e+07	5.03363e+07	5.03363e+07	3.57907e+07	5.30454e+07	3.31698e+07	3.21838e+07	3.98814e+07	5.61632e+07	4.45075e+07	3.20673e+07	4.40426e+07	8	8	8	8	8	8	7	8	8	8	8	8	8	8	8	8	8	8	7	8	8	8	8	8
P57016	16763	Lad1	FALSE	Ladinin-1 OS=Mus musculus OX=10090 GN=Lad1 PE=1 SV=1	34	18	173	18	76.695	462.81	18	58.8	8.51803e+06	1.65526e+07	1.6138e+07	1.6138e+07	4.40531e+06	5.97821e+06	2.99736e+06	1.48541e+07	1.31752e+07	1.26467e+07	5.02371e+06	5.91557e+06	3.5152e+06	18	18	16	16	14	13	18	17	17	16	15	15	18	18	16	16	14	13	18	17	17	16	15	15
Q5EBG8	230696	AU022252	FALSE	Uncharacterized protein C1orf50 homolog OS=Mus musculus OX=10090 PE=1 SV=1	90	12	173	12	84.36	515.16	12	21.8	6.60387e+07	1.16434e+08	1.09404e+08	1.09404e+08	7.69706e+07	9.82036e+07	7.09692e+07	7.52962e+07	8.68258e+07	9.66235e+07	9.2027e+07	1.06373e+08	1.14471e+08	12	11	11	11	11	11	11	11	11	11	11	12	12	11	11	11	11	11	11	11	11	11	11	12
O35143	11983	Atpif1	TRUE	ATPase inhibitor, mitochondrial OS=Mus musculus OX=10090 GN=Atp5if1 PE=1 SV=2	26	5	173	5	23.241	369.58	5	12.2	3.12248e+06	1.01479e+07	1.45115e+07	1.45115e+07	1.16454e+07	1.83775e+07	7.83765e+06	7.35595e+06	1.18447e+07	9.42588e+06	7.64161e+06	1.2055e+07	1.37894e+07	5	5	5	5	5	5	5	5	5	5	5	5	5	5	5	5	5	5	5	5	5	5	5	5
Q63836	20342	Selenbp2	FALSE	Selenium-binding protein 2 OS=Mus musculus OX=10090 GN=Selenbp2 PE=1 SV=2	40	17	172	3	84.972	519.76	17	52.6	6.6591e+07	1.24903e+08	9.91444e+07	9.91444e+07	2.39199e+07	6.47362e+07	3.22347e+07	8.84065e+07	7.37177e+07	1.0637e+08	3.42005e+07	2.95037e+07	3.25305e+07	16	16	15	12	13	12	17	16	16	11	12	12	2	2	2	0	0	0	3	2	2	0	0	0
P26041	17698	Msn	FALSE	Moesin OS=Mus musculus OX=10090 GN=Msn PE=1 SV=3	24	14	172	13	65.638	424.8	14	67.7	1.23155e+07	3.04664e+07	1.86371e+07	1.86371e+07	1.54899e+07	2.13488e+07	1.47303e+07	2.03057e+07	2.53813e+07	1.42582e+07	1.37236e+07	2.91507e+07	2.18936e+07	13	13	13	13	13	13	13	13	12	13	13	13	12	12	12	12	12	12	12	12	11	12	12	12
P16858	14433	Gapdh	FALSE	Glyceraldehyde-3-phosphate dehydrogenase OS=Mus musculus OX=10090 GN=Gapdh PE=1 SV=2	35	9	172	9	61.735	451.67	9	35.8	5.82724e+07	9.95209e+07	4.11886e+07	4.11886e+07	3.32877e+07	4.45834e+07	3.34774e+07	3.84685e+07	4.81693e+07	8.15027e+07	4.44891e+07	3.11264e+07	4.18154e+07	9	9	9	9	9	9	9	9	8	9	9	9	9	9	9	9	9	9	9	9	8	9	9	9
Q9CPV4	67201	Glod4	TRUE	Glyoxalase domain-containing protein 4 OS=Mus musculus OX=10090 GN=Glod4 PE=1 SV=1	66	17	171	17	79.803	448.02	17	33.3	7.03471e+06	1.14547e+07	7.39438e+06	7.39438e+06	1.95427e+07	1.58333e+07	30894958	7.28041e+06	7.31616e+06	2.81423e+07	1.4441e+07	3.90498e+06	1.85702e+07	15	12	10	17	15	17	14	13	16	15	11	17	15	12	10	17	15	17	14	13	16	15	11	17
Q8BVI5	228960	Stx16	FALSE	Syntaxin-16 OS=Mus musculus OX=10090 GN=Stx16 PE=1 SV=3	57	13	170	13	69.504	563.3	13	37.1	1.36233e+07	1.82117e+07	2.17808e+07	2.17808e+07	1.02168e+07	1.56956e+07	8.76723e+06	1.49467e+07	1.59803e+07	1.76512e+07	1.5567e+07	1.91145e+07	1.62472e+07	12	13	13	11	13	12	12	13	13	13	13	13	12	13	13	11	13	12	12	13	13	13	13	13
Q9D1J3	66118	Sarnp	FALSE	SAP domain-containing ribonucleoprotein OS=Mus musculus OX=10090 GN=Sarnp PE=1 SV=3	64	10	170	10	63.84	495.68	10	23.5	6.33411e+07	1.39516e+08	1.89757e+08	1.89757e+08	1.0846e+08	1.33426e+08	8.01969e+07	1.14335e+08	1.42613e+08	1.1634e+08	1.25277e+08	1.51278e+08	1.493e+08	10	10	10	10	10	9	10	10	9	10	10	10	10	10	10	10	10	9	10	10	9	10	10	10
P37804	21345	Tagln	FALSE	Transgelin OS=Mus musculus OX=10090 GN=Tagln PE=1 SV=3	60	12	170	12	53.03	397.09	12	22.6	1.32147e+07	2.67761e+07	1.93466e+07	1.93466e+07	2.36395e+07	2.34653e+07	2.04506e+07	1.92007e+07	1.86147e+07	2.29339e+07	2.93486e+07	1.91659e+07	2.21887e+07	12	12	12	12	12	12	12	12	12	12	12	12	12	12	12	12	12	12	12	12	12	12	12	12
Q62261	20742	Sptbn1	FALSE	Spectrin beta chain, non-erythrocytic 1 OS=Mus musculus OX=10090 GN=Sptbn1 PE=1 SV=2	14	26	170	26	102.19	435.52	26	274.1	7.20299e+06	1.0006e+07	5.2873e+06	5.2873e+06	8.68936e+06	1.42296e+07	9.79656e+06	6.48866e+06	7.28849e+06	9.67971e+06	9.13297e+06	8.93833e+06	1.03373e+07	23	19	19	23	21	23	21	24	20	20	25	23	23	19	19	23	21	23	21	24	20	20	25	23
P61982	22628	Ywhag	FALSE	14-3-3 protein gamma OS=Mus musculus OX=10090 GN=Ywhag PE=1 SV=2	57	15	170	8	70.553	418.33	15	28.3	5.24277e+06	5.00632e+06	2.65901e+06	2.65901e+06	5.29047e+06	9.3257e+06	7.63676e+06	1.22636e+06	1.99797e+06	1.29343e+07	9.29864e+06	2.18496e+06	2.84176e+06	13	14	11	13	15	15	8	10	15	15	10	10	6	7	5	7	8	8	2	4	8	8	4	4
Q8VEK0	69981	Tmem30a	FALSE	Cell cycle control protein 50A OS=Mus musculus OX=10090 GN=Tmem30a PE=1 SV=1	32	13	169	12	62.755	461.9	13	41	3.29674e+07	5.21656e+07	3.75409e+07	3.75409e+07	2.71176e+07	3.96164e+07	2.10939e+07	2.74566e+07	3.12506e+07	4.95236e+07	3.33331e+07	1.57978e+07	2.85064e+07	13	12	13	13	13	13	13	13	13	13	12	13	12	11	12	12	12	12	12	12	12	12	11	12
P36993	19043	Ppm1b	FALSE	Protein phosphatase 1B OS=Mus musculus OX=10090 GN=Ppm1b PE=1 SV=1	44	12	169	10	70.89	431.88	12	42.8	1.29208e+07	1.75566e+07	1.06392e+07	1.06392e+07	1.0444e+07	1.84681e+07	1.25328e+07	8.33072e+06	1.09135e+07	2.90488e+07	1.71346e+07	6.88516e+06	1.37057e+07	10	9	9	11	10	10	8	9	10	10	9	11	8	7	7	9	8	8	6	7	8	8	7	9
Q62384	22687	Zpr1	FALSE	Zinc finger protein ZPR1 OS=Mus musculus OX=10090 GN=Zpr1 PE=1 SV=1	40	16	169	16	83.738	468.27	16	50.7	1.30158e+07	2.16951e+07	2.58173e+07	2.58173e+07	1.356e+07	1.66787e+07	1.15735e+07	1.73655e+07	1.98975e+07	1.90467e+07	1.59661e+07	2.0503e+07	1.96116e+07	14	12	13	12	13	12	14	14	12	12	16	15	14	12	13	12	13	12	14	14	12	12	16	15
Q99MD9	50927	Nasp	FALSE	Nuclear autoantigenic sperm protein OS=Mus musculus OX=10090 GN=Nasp PE=1 SV=2	36	20	169	20	96.992	519.33	20	83.9	1.28087e+07	1.64234e+07	1.6326e+07	1.6326e+07	1.41206e+07	1.88865e+07	1.04488e+07	1.26399e+07	1.49194e+07	1.54981e+07	1.56527e+07	1.3049e+07	1.61367e+07	17	15	15	17	16	18	16	16	15	17	16	18	17	15	15	17	16	18	16	16	15	17	16	18
P63323	20042	Rps12	FALSE	40S ribosomal protein S12 OS=Mus musculus OX=10090 GN=Rps12 PE=1 SV=2	60	8	168	8	59.287	499.58	8	14.5	1.70334e+08	2.64939e+08	1.55977e+08	1.55977e+08	1.69076e+08	2.40312e+08	1.72072e+08	1.51758e+08	1.66584e+08	2.95692e+08	2.38184e+08	1.24409e+08	1.95706e+08	8	7	7	7	7	7	7	7	7	8	7	8	8	7	7	7	7	7	7	7	7	8	7	8
Q5SUF2	67684	Luc7l3	FALSE	Luc7-like protein 3 OS=Mus musculus OX=10090 GN=Luc7l3 PE=1 SV=1	31	15	168	15	72.965	411.66	15	51.4	1.38031e+07	1.63782e+07	3.17557e+07	3.17557e+07	7.94113e+06	1.24977e+07	5.65094e+06	1.66725e+07	1.62675e+07	1.80952e+07	1.03332e+07	1.64228e+07	5.56875e+06	14	13	15	14	14	15	14	14	14	14	14	11	14	13	15	14	14	15	14	14	14	14	14	11
P54726	19358	Rad23a	FALSE	UV excision repair protein RAD23 homolog A OS=Mus musculus OX=10090 GN=Rad23a PE=1 SV=2	57	12	168	10	65.73	509.04	12	39.7	1.05994e+07	1.80313e+07	1.70124e+07	1.70124e+07	1.31728e+07	1.69213e+07	1.23285e+07	1.56634e+07	1.34559e+07	1.43832e+07	1.53279e+07	1.88326e+07	1.48318e+07	12	12	12	12	11	12	12	12	11	12	11	12	10	10	10	10	9	10	10	10	9	10	9	10
Q5ND29	280408	Rilp	FALSE	Rab-interacting lysosomal protein OS=Mus musculus OX=10090 GN=Rilp PE=1 SV=1	53	16	168	15	71.577	440.1	16	41.1	1.53062e+07	3.55488e+07	3.77332e+07	3.77332e+07	1.94003e+07	4.11588e+07	2.25399e+07	1.82333e+07	3.38689e+07	4.13548e+07	2.74906e+07	1.62328e+07	2.59946e+07	12	13	13	14	13	12	13	14	13	12	13	13	11	12	12	13	12	11	12	13	12	11	12	12
O70591	18637	Pfdn2	FALSE	Prefoldin subunit 2 OS=Mus musculus OX=10090 GN=Pfdn2 PE=1 SV=2	52	7	168	7	45.547	478.48	7	16.5	4.54222e+07	9.0918e+07	1.0221e+08	1.0221e+08	6.07408e+07	7.46296e+07	4.90711e+07	6.43699e+07	7.26093e+07	8.242e+07	6.42024e+07	7.43332e+07	7.46563e+07	7	6	7	7	7	7	7	7	7	6	7	7	7	6	7	7	7	7	7	7	7	6	7	7
Q9D4H2	74375	Gcc1	FALSE	GRIP and coiled-coil domain-containing protein 1 OS=Mus musculus OX=10090 GN=Gcc1 PE=1 SV=2	34	22	167	22	88.036	453.54	22	87.6	8.51807e+06	1.12718e+07	1.36585e+07	1.36585e+07	8.01278e+06	8.79256e+06	6.32788e+06	9.51872e+06	8.97834e+06	1.11785e+07	8.80948e+06	9.41481e+06	9.11013e+06	20	20	20	20	18	17	18	19	18	19	20	20	20	20	20	20	18	17	18	19	18	19	20	20
P27661	15270	H2ax	FALSE	Histone H2AX OS=Mus musculus OX=10090 GN=H2ax PE=1 SV=2	64	7	167	3	32.332	426.06	7	15.1	1.76267e+07	3.14874e+07	1.13048e+07	1.13048e+07	2.60481e+07	3.87896e+07	3.29715e+07	2.62517e+07	2.24369e+07	4.89948e+07	3.89002e+07	1.77396e+07	3.65514e+07	7	7	6	7	7	7	7	7	7	7	7	7	3	3	2	3	3	3	3	3	3	3	3	3
Q69ZZ6	330401	Tmcc1	FALSE	Transmembrane and coiled-coil domains protein 1 OS=Mus musculus OX=10090 GN=Tmcc1 PE=1 SV=2	36	16	167	14	75.148	479.74	16	71.6	1.35363e+07	2.27903e+07	1.84235e+07	1.84235e+07	1.17787e+07	1.53513e+07	1.19468e+07	2.12638e+07	2.07341e+07	1.73922e+07	1.60179e+07	2.12991e+07	1.71253e+07	15	15	15	15	13	14	16	16	13	16	16	15	13	13	13	13	11	12	14	14	11	14	14	13
Q9D6K5	24071	Synj2bp	TRUE	Synaptojanin-2-binding protein OS=Mus musculus OX=10090 GN=Synj2bp PE=1 SV=1	87	9	167	9	47.773	500.05	9	15.8	6.1902e+07	8.37271e+07	8.31807e+07	8.31807e+07	5.357e+07	7.61527e+07	4.86696e+07	6.83815e+07	7.05114e+07	9.05565e+07	8.01116e+07	7.768e+07	8.16123e+07	9	8	8	8	8	8	9	8	8	9	9	9	9	8	8	8	8	8	9	8	8	9	9	9
Q80UU9	70804	Pgrmc2	FALSE	Membrane-associated progesterone receptor component 2 OS=Mus musculus OX=10090 GN=Pgrmc2 PE=1 SV=2	64	14	167	13	71.892	525.89	14	23.3	1.97043e+07	3.01854e+07	2.59742e+07	2.59742e+07	2.02608e+07	2.15628e+07	1.84484e+07	2.25537e+07	2.67179e+07	3.14821e+07	2.48779e+07	3.16635e+07	2.86835e+07	11	12	12	12	11	11	12	12	13	11	13	13	10	11	11	11	10	10	11	11	12	10	12	12
Q80UG5	53860	Septin9	FALSE	Septin-9 OS=Mus musculus OX=10090 GN=Septin9 PE=1 SV=1	28	16	167	16	53.364	426.28	16	65.5	1.48233e+07	2.79644e+07	2.69554e+07	2.69554e+07	2.18329e+07	3.47256e+07	1.86959e+07	2.17234e+07	3.00045e+07	2.37458e+07	2.44959e+07	3.05551e+07	2.95769e+07	15	14	13	14	15	15	13	14	15	15	13	15	15	14	13	14	15	15	13	14	15	15	13	15
P70302	20866	Stim1	FALSE	Stromal interaction molecule 1 OS=Mus musculus OX=10090 GN=Stim1 PE=1 SV=2	37	18	167	17	82.451	454.65	18	77.5	1.54991e+07	2.6003e+07	1.71208e+07	1.71208e+07	1.82542e+07	2.48531e+07	1.85911e+07	1.37845e+07	1.37307e+07	2.3848e+07	2.13818e+07	1.59736e+07	2.1121e+07	13	14	13	15	13	14	14	13	14	15	15	15	13	14	13	15	13	14	14	13	14	14	15	15
Q6P5G6	224111	Ubxn7	FALSE	UBX domain-containing protein 7 OS=Mus musculus OX=10090 GN=Ubxn7 PE=1 SV=2	46	14	166	14	67.436	434.93	14	52.1	8.32829e+06	1.53118e+07	1.62861e+07	1.62861e+07	9.90849e+06	1.58609e+07	8.93871e+06	9.67847e+06	1.34008e+07	1.34276e+07	1.23873e+07	1.17844e+07	1.3384e+07	13	10	11	11	11	12	12	12	11	13	12	12	13	10	11	11	11	12	12	12	11	13	12	12
P97434	26936	Mprip	FALSE	Myosin phosphatase Rho-interacting protein OS=Mus musculus OX=10090 GN=Mprip PE=1 SV=2	30	26	166	25	98.668	441.09	26	116.3	7.56385e+06	1.65063e+07	8.00002e+06	8.00002e+06	7.53285e+06	1.32748e+07	9.21218e+06	9.9253e+06	9.81633e+06	5.32607e+06	9.1588e+06	1.31353e+07	1.10313e+07	21	21	17	20	24	23	22	23	15	21	24	22	20	20	16	19	23	22	21	22	14	20	23	21
P47738	11669	Aldh2	TRUE	Aldehyde dehydrogenase, mitochondrial OS=Mus musculus OX=10090 GN=Aldh2 PE=1 SV=1	46	17	166	16	69.261	432.23	17	56.5	1.44936e+07	2.12432e+07	1.24951e+07	1.24951e+07	2.12008e+07	4.22031e+07	2.94063e+07	1.30466e+07	1.27992e+07	4.76096e+07	3.08555e+07	1.62437e+07	1.81674e+07	13	12	11	17	16	17	12	12	16	15	12	13	12	11	10	16	15	16	11	12	15	14	11	12
Q9DAU1	72029	Cnpy3	FALSE	Protein canopy homolog 3 OS=Mus musculus OX=10090 GN=Cnpy3 PE=1 SV=1	42	12	166	12	52.816	461.15	12	30.5	1.61242e+07	2.41106e+07	2.91339e+07	2.91339e+07	1.98471e+07	1.79727e+07	1.38499e+07	4.39721e+07	2.94441e+07	2.58325e+07	2.28953e+07	3.15134e+07	26233842	12	12	12	12	11	11	12	12	12	12	12	12	12	12	12	12	11	11	12	12	12	12	12	12
Q9CQE8	68045	Rtraf	FALSE	RNA transcription, translation and transport factor protein OS=Mus musculus OX=10090 GN=RTRAF PE=1 SV=1	63	13	165	13	74.15	504.73	13	28.1	2.65222e+07	4.88663e+07	1.44534e+07	1.44534e+07	2.53462e+07	4.84358e+07	3.4334e+07	1.46955e+07	1.63298e+07	6.25517e+07	4.25476e+07	9.372e+06	2.65797e+07	11	11	10	11	11	11	11	11	12	12	11	11	11	11	10	11	11	11	11	11	12	12	11	11
D3Z6Q9	668218	Bin2	FALSE	Bridging integrator 2 OS=Mus musculus OX=10090 GN=Bin2 PE=1 SV=1	37	16	165	14	83.692	439.51	16	52.5	1.14252e+07	1.45922e+07	2.12834e+07	2.12834e+07	1.74936e+07	2.00959e+07	1.35951e+07	1.8073e+07	3.7528e+07	1.91201e+07	1.47542e+07	2.6953e+07	2.47305e+07	15	15	16	16	15	15	16	16	15	13	15	15	13	13	14	14	13	13	14	14	13	11	13	13
P07309	22139	Ttr	FALSE	Transthyretin OS=Mus musculus OX=10090 GN=Ttr PE=1 SV=1	63	7	165	7	45.963	477.2	7	15.8	2.58425e+08	2.45644e+08	2.23513e+08	2.23513e+08	1.74086e+08	1.42958e+08	1.36867e+08	2.3381e+08	2.68677e+08	2.84387e+08	2.11995e+08	3.40397e+08	3.02133e+08	7	7	7	7	7	6	7	7	7	6	7	7	7	7	7	7	7	6	7	7	7	6	7	7
P14206	16785	Rpsa	FALSE	40S ribosomal protein SA OS=Mus musculus OX=10090 GN=Rpsa PE=1 SV=4	58	13	164	13	60.613	506.18	13	32.8	2.3442e+07	3.07026e+07	1.19995e+07	1.19995e+07	2.20734e+07	4.56447e+07	3.12844e+07	8.84814e+06	1.10277e+07	5.99591e+07	3.83088e+07	5.71888e+06	1.795e+07	13	13	12	12	13	13	12	12	13	13	10	13	13	13	12	12	13	13	12	12	13	13	10	13
Q80WT5	216549	Aftph	FALSE	Aftiphilin OS=Mus musculus OX=10090 GN=Aftph PE=1 SV=2	26	17	164	17	95.288	474.84	17	101.1	6.80385e+06	9.73078e+06	1.28534e+07	1.28534e+07	6.41461e+06	9.60344e+06	5.3622e+06	1.04962e+07	1.07278e+07	8.91355e+06	7.68203e+06	1.28228e+07	1.13304e+07	14	16	14	13	15	14	16	16	15	13	16	17	14	16	14	13	15	14	16	16	15	13	16	17
Q9CR61	66916	Ndufb7	TRUE	NADH dehydrogenase [ubiquinone] 1 beta subcomplex subunit 7 OS=Mus musculus OX=10090 GN=Ndufb7 PE=1 SV=3	47	6	164	6	33.464	414.03	6	16.3	1.87742e+07	2.55963e+07	1.75487e+07	1.75487e+07	1.40207e+07	2.08953e+07	1.8894e+07	1.39588e+07	1.08711e+07	1.5052e+07	1.64312e+07	8.18659e+06	1.50796e+07	4	4	4	4	4	4	4	5	4	4	4	4	4	4	4	4	4	4	4	5	4	4	4	4
P56212	59046	Arpp19	FALSE	cAMP-regulated phosphoprotein 19 OS=Mus musculus OX=10090 GN=Arpp19 PE=1 SV=2	81	11	163	10	70.437	426.75	11	12.3	1.14054e+07	2.56653e+07	2.98428e+07	2.98428e+07	1.82132e+07	1.683e+07	1.331e+07	2.35253e+07	3.18499e+07	2.68643e+07	1.4846e+07	2.7732e+07	2.45252e+07	10	11	10	11	11	11	9	11	11	10	11	11	9	10	9	10	10	10	8	10	10	9	10	10
Q9EQU5	56086	Set	FALSE	Protein SET OS=Mus musculus OX=10090 GN=Set PE=1 SV=1	48	11	163	11	71.326	519.53	11	33.4	1.47206e+08	2.47485e+08	3.16974e+08	3.16974e+08	1.33715e+08	1.98226e+08	1.00319e+08	2.20799e+08	2.50946e+08	2.07967e+08	1.85107e+08	2.36462e+08	1.82412e+08	11	10	11	10	11	11	10	11	11	11	10	11	11	10	11	10	11	11	10	11	11	11	10	11
Q80U49	217882	Cep170b	FALSE	Centrosomal protein of 170 kDa protein B OS=Mus musculus OX=10090 GN=Cep170b PE=1 SV=2	17	21	163	20	83.266	443.73	21	170.7	5.29148e+06	9.90671e+06	7.94784e+06	7.94784e+06	3.69361e+06	4.23788e+06	3.70772e+06	7.94461e+06	8.76089e+06	5.80472e+06	3.78018e+06	8.71165e+06	6.97138e+06	19	19	18	16	16	15	20	20	18	15	20	19	18	18	17	16	16	15	19	19	17	14	19	19
Q8CBW3	11308	Abi1	FALSE	Abl interactor 1 OS=Mus musculus OX=10090 GN=Abi1 PE=1 SV=3	53	16	162	13	77.761	447.4	16	52.3	1.30053e+07	2.87647e+07	2.29823e+07	2.29823e+07	1.55979e+07	2.58778e+07	1.55827e+07	1.86008e+07	1.98866e+07	2.45458e+07	1.90458e+07	1.97397e+07	2.30951e+07	14	13	14	13	13	15	14	14	14	14	14	14	11	10	11	10	10	12	11	11	11	11	11	11
P81117	53322	Nucb2	FALSE	Nucleobindin-2 OS=Mus musculus OX=10090 GN=Nucb2 PE=1 SV=2	49	17	162	17	85.363	388.79	17	50.3	1.03149e+07	1.84902e+07	1.56239e+07	1.56239e+07	9.90031e+06	1.38604e+07	7.2396e+06	2.12345e+07	2.20169e+07	1.57454e+07	1.01608e+07	1.4832e+07	1.77578e+07	14	15	13	14	14	13	17	17	14	14	15	16	14	15	13	14	14	13	17	17	14	14	15	16
P26443	14661	Glud1	TRUE	Glutamate dehydrogenase 1, mitochondrial OS=Mus musculus OX=10090 GN=Glud1 PE=1 SV=1	31	15	161	15	62.58	371.21	15	61.3	2.01604e+07	3.34108e+07	2.64095e+07	2.64095e+07	2.32464e+07	3.96124e+07	2.71033e+07	2.51067e+07	2.59476e+07	60645388	3.47876e+07	3.61733e+07	2.80163e+07	13	14	12	14	13	13	12	13	15	15	12	13	13	14	12	14	13	13	12	13	15	15	12	13
Q91YI0	109900	Asl	FALSE	Argininosuccinate lyase OS=Mus musculus OX=10090 GN=Asl PE=1 SV=1	29	12	161	12	53.765	423.96	12	51.7	1.66776e+07	3.01555e+07	29185148	29185148	1.69641e+07	3.32848e+07	1.96978e+07	2.06933e+07	1.88387e+07	1.94967e+07	2.7512e+07	2.24248e+07	2.13717e+07	11	10	11	10	11	11	11	11	10	11	10	10	11	10	11	10	11	11	11	11	10	11	10	10
Q923D5	60321	Wbp11	FALSE	WW domain-binding protein 11 OS=Mus musculus OX=10090 GN=Wbp11 PE=1 SV=2	27	14	161	14	64.71	405.49	14	69.8	9.21885e+06	1.54752e+07	1.68935e+07	1.68935e+07	1.16758e+07	1.63715e+07	9.85907e+06	1.2194e+07	1.22383e+07	1.19204e+07	1.27223e+07	1.35145e+07	1.36609e+07	12	13	14	13	13	12	12	13	13	14	13	13	12	13	14	13	13	12	12	13	13	14	13	13
P70452	20909	Stx4a	FALSE	Syntaxin-4 OS=Mus musculus OX=10090 GN=Stx4 PE=1 SV=1	54	12	161	12	57.881	488.26	12	34.1	2.59117e+07	4.00042e+07	3.41884e+07	3.41884e+07	3.13528e+07	4.53196e+07	2.87311e+07	2.88043e+07	2.98038e+07	4.03839e+07	3.65969e+07	3.01753e+07	3.58656e+07	10	11	12	11	10	10	11	11	11	11	11	11	10	11	12	11	10	10	11	11	11	11	11	11
Q8R0A0	68705	Gtf2f2	FALSE	General transcription factor IIF subunit 2 OS=Mus musculus OX=10090 GN=Gtf2f2 PE=1 SV=1	48	11	161	11	45.083	351.35	11	28.4	7.20512e+06	1.38923e+07	1.00288e+07	1.00288e+07	7.62488e+06	1.24606e+07	7.56367e+06	7.82223e+06	9.10397e+06	1.31533e+07	1.12418e+07	9.08279e+06	1.02972e+07	10	11	10	9	10	11	10	9	10	11	11	11	10	11	10	9	10	11	10	9	10	11	11	11
P56213	11692	Gfer	TRUE	FAD-linked sulfhydryl oxidase ALR OS=Mus musculus OX=10090 GN=Gfer PE=1 SV=2	58	13	161	13	65.426	401.86	13	22.9	4.10011e+07	4.95115e+07	7.37272e+07	7.37272e+07	2.9516e+07	5.11217e+07	3.13479e+07	6.82451e+07	7.78481e+07	1.11287e+08	6.30552e+07	1.05823e+08	6.74491e+07	12	10	12	10	11	11	12	13	13	13	13	13	12	10	12	10	11	11	12	13	13	13	13	13
Q7TSI3	243819	Ppp6r1	FALSE	Serine/threonine-protein phosphatase 6 regulatory subunit 1 OS=Mus musculus OX=10090 GN=Ppp6r1 PE=1 SV=1	32	18	161	18	95.496	458.69	18	94.5	9.08613e+06	1.40601e+07	6.47008e+06	6.47008e+06	8.74235e+06	1.26164e+07	8.94425e+06	5.13299e+06	5.64104e+06	1.75397e+07	1.06191e+07	3.25864e+07	1.17965e+07	17	16	14	16	16	18	14	14	18	18	11	17	17	16	14	16	16	18	14	14	18	18	11	17
Q60972	19646	Rbbp4	FALSE	Histone-binding protein RBBP4 OS=Mus musculus OX=10090 GN=Rbbp4 PE=1 SV=5	55	16	161	9	64.795	405.3	16	47.6	3.25107e+07	5.06815e+07	1.52071e+07	1.52071e+07	3.2365e+07	5.9782e+07	4.12584e+07	1.4941e+07	1.69227e+07	6.47279e+07	5.45002e+07	8.76381e+06	2.92297e+07	16	15	13	15	14	15	14	14	15	15	13	15	9	8	6	8	8	8	7	7	8	8	6	8
Q6Y7W8	227331	Gigyf2	FALSE	GRB10-interacting GYF protein 2 OS=Mus musculus OX=10090 GN=Gigyf2 PE=1 SV=2	19	20	161	20	85.14	407	20	149.1	8.77226e+06	1.57151e+07	8.74646e+06	8.74646e+06	8.35104e+06	1.07171e+07	7.24261e+06	8.96278e+06	9.38789e+06	1.19983e+07	8.58174e+06	8.1119e+06	9.08551e+06	18	19	14	16	15	16	16	18	17	16	15	16	18	19	14	16	15	16	16	18	17	16	15	16
Q7TPV4	18432	Mybbp1a	FALSE	Myb-binding protein 1A OS=Mus musculus OX=10090 GN=Mybbp1a PE=1 SV=2	14	17	161	17	62.014	431.71	17	151.9	4.6682e+06	1.57059e+07	1.16982e+07	1.16982e+07	5.66776e+06	8.00212e+06	4.59333e+06	9.31304e+06	8.26778e+06	5.02035e+06	5.17952e+06	1.01513e+07	6.74823e+06	13	16	16	16	16	14	17	17	14	16	17	16	13	16	16	16	16	14	17	17	14	16	17	16
Q9DCS9	68342	Ndufb10	TRUE	NADH dehydrogenase [ubiquinone] 1 beta subcomplex subunit 10 OS=Mus musculus OX=10090 GN=Ndufb10 PE=1 SV=3	63	10	160	10	51.341	482.45	10	21	8.76191e+07	1.48567e+08	1.00091e+08	1.00091e+08	7.22627e+07	1.38323e+08	7.64091e+07	6.28432e+07	6.6836e+07	1.17085e+08	8.78596e+07	5.1651e+07	8.38945e+07	9	8	8	10	10	10	9	10	10	10	9	9	9	8	8	10	10	10	9	10	10	10	9	9
Q9CPX6	67841	Atg3	FALSE	Ubiquitin-like-conjugating enzyme ATG3 OS=Mus musculus OX=10090 GN=Atg3 PE=1 SV=1	64	13	160	13	64.466	382.31	13	35.8	2.94862e+07	4.77776e+07	1.93283e+07	1.93283e+07	2.77513e+07	3.55582e+07	3.14926e+07	1.84541e+07	2.41004e+07	52861957	4.10973e+07	1.45755e+07	3.99067e+07	13	12	10	11	10	10	12	12	10	12	11	12	13	12	10	11	10	10	12	12	10	12	11	12
Q9DCM0	66071	Ethe1	TRUE	Persulfide dioxygenase ETHE1, mitochondrial OS=Mus musculus OX=10090 GN=Ethe1 PE=1 SV=2	72	11	160	11	63.235	462.14	11	27.7	2.91631e+07	4.0459e+07	1.98155e+07	1.98155e+07	5.2095e+07	8.6515e+07	6.26699e+07	1.19203e+07	2.08931e+07	130607469	8.2179e+07	1.4636e+07	5.01126e+07	11	11	9	11	11	11	10	11	11	11	10	11	11	11	9	11	11	11	10	11	11	11	10	11
Q8BFW7	210126	Lpp	FALSE	Lipoma-preferred partner homolog OS=Mus musculus OX=10090 GN=Lpp PE=1 SV=1	30	11	160	11	78.618	493.36	11	65.8	1.43233e+07	3.45077e+07	2.44688e+07	2.44688e+07	1.92099e+07	3.01895e+07	2.21808e+07	2.95879e+07	2.44504e+07	2.39708e+07	2.30532e+07	3.53919e+07	2.85841e+07	9	10	9	9	10	9	10	10	8	9	10	10	9	10	9	9	10	9	10	10	8	9	10	10
P17047	16784	Lamp2	FALSE	Lysosome-associated membrane glycoprotein 2 OS=Mus musculus OX=10090 GN=Lamp2 PE=1 SV=2	19	8	160	8	27.734	302.33	8	45.7	8.58984e+07	1.33315e+08	1.42595e+08	1.42595e+08	1.13967e+08	1.24474e+08	6.67003e+07	8.99206e+07	1.14295e+08	1.41996e+08	9.98582e+07	8.59504e+07	1.24565e+08	7	8	8	8	8	8	7	8	8	8	8	8	7	8	8	8	8	8	7	8	8	8	8	8
P54775	23996	Psmc4	FALSE	26S proteasome regulatory subunit 6B OS=Mus musculus OX=10090 GN=Psmc4 PE=1 SV=2	59	18	160	17	86.035	483.42	18	47.4	1.55958e+07	2.17874e+07	4.83926e+06	4.83926e+06	1.42645e+07	2.8155e+07	2.54624e+07	3.27805e+06	3.68926e+06	3.92797e+07	2.86424e+07	2.17212e+06	1.32565e+07	16	18	12	17	17	17	14	12	18	17	8	17	15	17	12	16	16	16	13	11	17	16	8	16
Q8BJU0	52551	Sgta	FALSE	Small glutamine-rich tetratricopeptide repeat-containing protein alpha OS=Mus musculus OX=10090 GN=Sgta PE=1 SV=2	44	13	159	13	53.716	402.54	13	34.3	1.73567e+07	3.2135e+07	1.92632e+07	1.92632e+07	1.6423e+07	2.14137e+07	1.68181e+07	1.35499e+07	1.70098e+07	3.88117e+07	2.34047e+07	1.10602e+07	2.36645e+07	13	12	12	13	11	12	10	11	12	11	10	13	13	12	12	13	11	12	10	11	12	11	10	13
P09803	12550	Cdh1	FALSE	Cadherin-1 OS=Mus musculus OX=10090 GN=Cdh1 PE=1 SV=1	31	16	159	16	78.418	501.92	16	98.2	1.76249e+07	2.08457e+07	3.15743e+07	3.15743e+07	1.52571e+07	1.48495e+07	1.47237e+07	2.00085e+07	2.33769e+07	2.59391e+07	1.45286e+07	1.4288e+07	2.41666e+07	14	14	14	13	12	14	14	14	14	12	13	14	14	14	14	13	12	14	14	14	14	12	13	14
P48024	20918	Eif1	FALSE	Eukaryotic translation initiation factor 1 OS=Mus musculus OX=10090 GN=Eif1 PE=1 SV=2	79	11	159	11	65.878	533.28	11	12.7	6.24241e+07	1.00834e+08	7.93218e+07	7.93218e+07	6.14848e+07	7.11838e+07	5.61928e+07	6.29916e+07	6.7464e+07	1.03907e+08	8.23074e+07	6.37942e+07	8.26934e+07	10	11	11	11	11	11	11	11	11	11	11	11	10	11	11	11	11	11	11	11	11	11	11	11
Q8VDJ3	110611	Hdlbp	FALSE	Vigilin OS=Mus musculus OX=10090 GN=Hdlbp PE=1 SV=1	21	21	159	21	87.046	458.03	21	141.7	1.50611e+07	3.58561e+07	1.91232e+07	1.91232e+07	1.56127e+07	2.56963e+07	1.98632e+07	1.93886e+07	2.08626e+07	1.72506e+07	1.56037e+07	1.97522e+07	1.48028e+07	21	19	15	20	18	20	18	16	19	18	15	19	21	19	15	20	18	20	18	16	19	18	15	19
Q811D0	13383	Dlg1	FALSE	Disks large homolog 1 OS=Mus musculus OX=10090 GN=Dlg1 PE=1 SV=1	41	25	159	25	93.488	445.85	25	100.1	9.24319e+06	1.92503e+07	5.56873e+06	5.56873e+06	1.06515e+07	2.06278e+07	1.36373e+07	8.99335e+06	7.00896e+06	1.39262e+07	1.44791e+07	9.20526e+06	1.08409e+07	21	21	12	21	23	24	19	17	21	23	19	18	21	21	12	21	23	24	19	17	21	23	19	18
Q8K0E8	110135	Fgb	FALSE	Fibrinogen beta chain OS=Mus musculus OX=10090 GN=Fgb PE=1 SV=1	45	18	159	18	82.172	480.45	18	54.7	3.33075e+07	3.58274e+07	2.55018e+07	2.55018e+07	1.92294e+07	3.80607e+07	2.82153e+07	1.8298e+07	2.26303e+07	3.72405e+07	3.36712e+07	1.90075e+07	24765606	18	17	14	17	17	16	15	16	17	17	14	16	18	17	14	17	17	16	15	16	17	17	14	16
P48193	269587	Epb41	FALSE	Protein 4.1 OS=Mus musculus OX=10090 GN=Epb41 PE=1 SV=2	22	14	159	12	68.439	437.11	14	95.9	2.66425e+07	4.98605e+07	3.95201e+07	3.95201e+07	3.49424e+07	5.16836e+07	2.82164e+07	3.83947e+07	3.41518e+07	1.88707e+07	3.68363e+07	6.04002e+07	4.07682e+07	12	13	13	13	14	11	13	13	9	12	13	12	10	11	11	11	12	9	11	11	7	10	11	10
P17563	20341	Selenbp1	FALSE	Methanethiol oxidase OS=Mus musculus OX=10090 GN=Selenbp1 PE=1 SV=2	38	16	159	2	79.526	472.42	16	52.5						2.21659e+06	1011291				932004	347756		14	14	13	12	15	13	14	14	14	12	13	12	0	0	0	0	2	1	0	0	0	1	1	0
Q99KG5	54135	Lsr	FALSE	Lipolysis-stimulated lipoprotein receptor OS=Mus musculus OX=10090 GN=Lsr PE=1 SV=1	30	14	159	14	70.197	396.58	14	66.1	1.1439e+07	2.9563e+07	1.61069e+07	1.61069e+07	1.74775e+07	2.83459e+07	1.54002e+07	1.88363e+07	1.88508e+07	1.90061e+07	1.87738e+07	2.00991e+07	2.21359e+07	14	14	14	14	14	14	14	14	14	14	14	14	14	14	14	14	14	14	14	14	14	14	14	14
Q925B0	114774	Pawr	FALSE	PRKC apoptosis WT1 regulator protein OS=Mus musculus OX=10090 GN=Pawr PE=1 SV=2	69	15	158	15	94.505	488.2	15	35.9	8.97818e+06	2.50335e+07	2.73046e+07	2.73046e+07	1.4572e+07	2.0712e+07	1.56247e+07	1.80735e+07	2.36315e+07	1.9333e+07	1.70978e+07	3.01923e+07	2.62562e+07	12	11	11	12	13	12	13	13	14	14	13	13	12	11	11	12	13	12	13	13	14	14	13	13
P32507	19294	Nectin2	FALSE	Nectin-2 OS=Mus musculus OX=10090 GN=Nectin2 PE=1 SV=2	38	12	158	12	61.172	471.04	12	57.3	2.51149e+07	3.43214e+07	3.56917e+07	3.56917e+07	1.89588e+07	2.20371e+07	14657256	2.72505e+07	2.9905e+07	35870283	2.31914e+07	1.82382e+07	2.2642e+07	12	11	12	11	10	11	12	12	11	11	11	12	12	11	12	11	10	11	12	12	11	11	11	12
P11609	12479	Cd1d1	FALSE	Antigen-presenting glycoprotein CD1d1 OS=Mus musculus OX=10090 GN=Cd1d1 PE=1 SV=3	25	7	157	2	39.078	284.75	7	38.5	3.20056e+07	4.26543e+07	3.92933e+07	3.92933e+07	4.7319e+07	6.1129e+07	4.17103e+07	3.12965e+07	2.61353e+07	6.02957e+07	5.94467e+07	3.17218e+07	6.53216e+07	7	7	6	7	7	7	7	7	7	7	7	7	2	2	1	2	2	2	2	2	2	2	2	2
P98078	13132	Dab2	FALSE	Disabled homolog 2 OS=Mus musculus OX=10090 GN=Dab2 PE=1 SV=2	32	17	157	17	73.851	418.19	17	82.3	8.61351e+06	1.43207e+07	1.4856e+07	1.4856e+07	1.2676e+07	1.46955e+07	9.86626e+06	1.20338e+07	1.44591e+07	1.28247e+07	1.23122e+07	1.61129e+07	1.53798e+07	16	15	15	17	16	17	16	16	16	17	17	17	16	15	15	17	16	17	16	16	16	17	17	17
Q9CWZ7	108123	Napg	FALSE	Gamma-soluble NSF attachment protein OS=Mus musculus OX=10090 GN=Napg PE=1 SV=1	47	15	157	15	57.334	385.49	15	34.7	2.53955e+07	43822402	4.26462e+07	4.26462e+07	2.54047e+07	3.35974e+07	2.30735e+07	3.06305e+07	3.5485e+07	4.73491e+07	3.61067e+07	3.58639e+07	3.76906e+07	14	14	15	14	15	15	14	14	14	14	14	14	14	14	15	14	15	15	14	14	14	14	14	14
O35841	11800	Api5	FALSE	Apoptosis inhibitor 5 OS=Mus musculus OX=10090 GN=Api5 PE=1 SV=2	31	12	157	12	55.692	473.14	12	56.8	3.1334e+07	6.3626e+07	3.70247e+07	3.70247e+07	2.32041e+07	3.61161e+07	2.38522e+07	3.87036e+07	3.9614e+07	2.41475e+07	2.76279e+07	4.61205e+07	2.89415e+07	12	12	12	12	12	12	12	12	12	12	12	12	12	12	12	12	12	12	12	12	12	12	12	12
O08579	13726	Emd	FALSE	Emerin OS=Mus musculus OX=10090 GN=Emd PE=1 SV=1	79	14	156	14	72.951	436.89	14	29.4	1.11705e+07	1.94205e+07	1.61299e+07	1.61299e+07	1.10179e+07	1.41612e+07	1.31928e+07	1.22645e+07	1.48566e+07	1.91315e+07	1.55283e+07	1.48236e+07	1.6163e+07	12	11	10	12	10	13	11	13	12	12	11	12	12	11	10	12	10	13	11	13	12	12	11	12
Q9DBR0	56399	Akap8	FALSE	A-kinase anchor protein 8 OS=Mus musculus OX=10090 GN=Akap8 PE=1 SV=1	33	17	156	17	79.647	367.29	17	76.2	9.05086e+06	1.33127e+07	1.51872e+07	1.51872e+07	9.0421e+06	1.24494e+07	7.01153e+06	1.34336e+07	1.24781e+07	1.23806e+07	1.08021e+07	1.34963e+07	1.32806e+07	15	16	16	16	16	15	16	14	15	15	17	17	15	16	16	16	16	15	16	14	15	15	17	17
Q9D6J5	67264	Ndufb8	TRUE	NADH dehydrogenase [ubiquinone] 1 beta subcomplex subunit 8, mitochondrial OS=Mus musculus OX=10090 GN=Ndufb8 PE=1 SV=1	58	9	156	9	73.8	380.13	9	21.9	6.33252e+07	9.80369e+07	6.62584e+07	6.62584e+07	5.48738e+07	8.40216e+07	7.0513e+07	3.49751e+07	3.23215e+07	5.22272e+07	6.7333e+07	1.49953e+07	6.13965e+07	8	8	8	8	8	8	8	8	8	8	8	8	8	8	8	8	8	8	8	8	8	8	8	8
P54071	269951	Idh2	TRUE	Isocitrate dehydrogenase [NADP], mitochondrial OS=Mus musculus OX=10090 GN=Idh2 PE=1 SV=3	43	18	154	17	73.909	395.66	18	50.9	7.81925e+06	1.05775e+07	5.89675e+06	5.89675e+06	1.53063e+07	3.50172e+07	3.25009e+07	5.74429e+06	6.77094e+06	4.92721e+07	3.01065e+07	1.09393e+07	2.03364e+07	15	12	10	15	17	16	13	12	16	15	13	15	14	11	9	14	16	15	12	11	15	14	12	14
Q63880	382053	Ces3a	FALSE	Carboxylesterase 3A OS=Mus musculus OX=10090 GN=Ces3a PE=1 SV=2	35	13	154	8	61.153	444.02	13	63.3	2.41747e+07	4.64821e+07	2.45464e+07	2.45464e+07	1.17686e+07	1.60255e+07	1.07341e+07	2.49289e+07	2.54583e+07	3.61302e+07	1.66937e+07	1.12045e+07	1.40507e+07	12	12	11	11	10	11	11	12	13	12	9	10	7	7	7	6	6	7	7	7	8	7	5	6
Q9CQR2	66481	Rps21	FALSE	40S ribosomal protein S21 OS=Mus musculus OX=10090 GN=Rps21 PE=1 SV=1	77	7	153	7	44.168	414.69	7	9.1	1.5756e+08	2.78699e+08	2.09611e+08	2.09611e+08	1.59459e+08	2.03128e+08	1.41534e+08	1.94652e+08	2.11359e+08	2.45261e+08	1.82084e+08	1.71254e+08	1.83993e+08	7	7	7	7	7	7	7	7	7	7	7	7	7	7	7	7	7	7	7	7	7	7	7	7
Q8K3C3	69151	Lzic	FALSE	Protein LZIC OS=Mus musculus OX=10090 GN=Lzic PE=1 SV=1	68	10	153	10	68.924	497.83	10	21.5	1.87646e+07	3.85903e+07	4.24004e+07	4.24004e+07	2.48676e+07	3.06122e+07	1.98752e+07	3.02131e+07	3.71529e+07	2.62809e+07	2.51705e+07	3.88422e+07	3.23244e+07	10	10	10	10	10	10	10	10	10	10	10	10	10	10	10	10	10	10	10	10	10	10	10	10
Q06185	11958	Atp5k	TRUE	ATP synthase subunit e, mitochondrial OS=Mus musculus OX=10090 GN=Atp5me PE=1 SV=2	68	6	153	6	33.419	375.71	6	8.2	7.59425e+07	1.31554e+08	7.04412e+07	7.04412e+07	8.34324e+07	1.46033e+08	1.13448e+08	7.42992e+07	7.5475e+07	2.60261e+08	1.33561e+08	7.50567e+07	103063702	6	6	6	6	6	6	6	6	6	6	6	6	6	6	6	6	6	6	6	6	6	6	6	6
Q62523	22793	Zyx	FALSE	Zyxin OS=Mus musculus OX=10090 GN=Zyx PE=1 SV=2	29	11	153	11	62.584	434.58	11	60.5	1.03956e+07	1.87634e+07	2.42366e+07	2.42366e+07	1.21014e+07	1.49945e+07	9.90801e+06	1.67916e+07	2.14505e+07	2.45046e+07	1.46021e+07	1.74393e+07	2.00196e+07	9	9	9	9	9	9	10	11	11	10	11	10	9	9	9	9	9	9	10	11	11	10	11	10
Q9JK53	116847	Prelp	FALSE	Prolargin OS=Mus musculus OX=10090 GN=Prelp PE=1 SV=2	34	12	152	12	55.823	417.83	12	43.3	3.65756e+07	5.89775e+07	39411231	39411231	5.02971e+07	9.43844e+07	8.72502e+07	3.12484e+07	2.84669e+07	1.77596e+08	8.8235e+07	1.92665e+07	5.95289e+07	12	12	12	12	12	12	12	12	12	12	12	12	12	12	12	12	12	12	12	12	12	12	12	12
Q91VX2	68926	Ubap2	FALSE	Ubiquitin-associated protein 2 OS=Mus musculus OX=10090 GN=Ubap2 PE=1 SV=1	20	17	152	17	83.12	414.03	17	117.9	6.14418e+06	9.79761e+06	1.0575e+07	1.0575e+07	6.46624e+06	7.21214e+06	5.16763e+06	9.61616e+06	9.6519e+06	8.13819e+06	6.33785e+06	1.08018e+07	7.87246e+06	15	16	15	15	15	15	15	15	15	16	16	14	15	16	15	15	15	15	15	15	15	16	16	14
Q91VM5	19656	Rbmxl1	FALSE	RNA binding motif protein, X-linked-like-1 OS=Mus musculus OX=10090 GN=Rbmxl1 PE=2 SV=1	38	15	152	3	56.372	292.79	15	42.1	1.90283e+07	3.87673e+07	3.05468e+07	3.05468e+07	1.80774e+07	3.19908e+07	1.87794e+07	1.54766e+07	2.8013e+07	1.94661e+07	1.90327e+07	2.37909e+07	2.36449e+07	15	15	15	15	15	15	15	15	15	15	15	15	3	3	3	3	3	3	3	3	3	3	3	3
Q8R3Q6	381045	Ccdc58	TRUE	Protein MIX23 OS=Mus musculus OX=10090 GN=Mix23 PE=1 SV=1	72	9	151	9	65.3	431.32	9	16.7	4.01218e+07	7.82301e+07	4.38668e+07	4.38668e+07	4.63824e+07	6.77537e+07	4.39852e+07	4.8602e+07	4.90448e+07	1.28507e+08	6.5194e+07	5.00684e+07	5.95922e+07	9	9	9	9	9	9	9	9	9	9	9	9	9	9	9	9	9	9	9	9	9	9	9	9
Q80XI3	230861	Eif4g3	FALSE	Eukaryotic translation initiation factor 4 gamma 3 OS=Mus musculus OX=10090 GN=Eif4g3 PE=1 SV=2	13	16	151	12	72.37	398.14	16	174.8	4.04339e+06	7.69514e+06	6.14094e+06	6.14094e+06	3.12705e+06	4.47514e+06	2.23784e+06	7.14557e+06	6.45151e+06	3.05132e+06	2.75201e+06	5.8346e+06	3.1241e+06	15	15	16	15	14	14	17	16	12	13	17	14	10	10	11	10	9	9	12	11	7	8	12	9
Q8VDT9	28028	Mrpl50	TRUE	39S ribosomal protein L50, mitochondrial OS=Mus musculus OX=10090 GN=Mrpl50 PE=1 SV=2	60	10	151	10	59.659	457.91	10	18.2	1.55925e+07	2.93492e+07	1.97184e+07	1.97184e+07	1.44305e+07	1.75592e+07	1.14112e+07	2.52835e+07	2.44277e+07	4.21975e+07	2.05772e+07	2.33602e+07	1.99283e+07	10	10	9	10	9	9	10	10	10	10	10	10	10	10	9	10	9	9	10	10	10	10	10	10
Q59J78	75597	Ndufaf2	TRUE	NADH dehydrogenase [ubiquinone] 1 alpha subcomplex assembly factor 2 OS=Mus musculus OX=10090 GN=Ndufaf2 PE=1 SV=1	74	13	151	13	53.811	375.97	13	19.6	2.3156e+07	3.31225e+07	2.69588e+07	2.69588e+07	1.97043e+07	2.79955e+07	2.03793e+07	3.52211e+07	3.22922e+07	5.55938e+07	3.31249e+07	3.69078e+07	3.24874e+07	13	12	12	12	13	13	13	13	13	13	13	13	13	12	12	12	13	13	13	13	13	13	13	13
P14094	11931	Atp1b1	FALSE	Sodium/potassium-transporting ATPase subunit beta-1 OS=Mus musculus OX=10090 GN=Atp1b1 PE=1 SV=1	35	13	151	13	44.712	302.41	13	35.2	2.40698e+07	3.75223e+07	3.44322e+07	3.44322e+07	2.50509e+07	4.5543e+07	2.95923e+07	1.99215e+07	2.47824e+07	5.70057e+07	4.05574e+07	1.3763e+07	2.95881e+07	11	11	10	11	11	12	10	12	11	12	11	11	11	11	10	11	11	12	10	12	11	12	11	11
Q9JHS4	270166	Clpx	TRUE	ATP-dependent Clp protease ATP-binding subunit clpX-like, mitochondrial OS=Mus musculus OX=10090 GN=Clpx PE=1 SV=2	34	21	151	21	93.95	451.04	21	69.2	1.4408e+07	2.26141e+07	1.95859e+07	1.95859e+07	1.53519e+07	2.49847e+07	1.94438e+07	1.61433e+07	1.63916e+07	3.27995e+07	2.39225e+07	1.95046e+07	1.82718e+07	17	13	11	17	16	19	14	16	17	17	16	18	17	13	11	17	16	19	14	16	17	17	16	18
Q8C0Q2	320799	Zhx3	FALSE	Zinc fingers and homeoboxes protein 3 OS=Mus musculus OX=10090 GN=Zhx3 PE=1 SV=2	24	15	150	15	68.26	394.19	15	104.3	6.36826e+06	1.3935e+07	1.05e+07	1.05e+07	7.28268e+06	1.22486e+07	5.95998e+06	8.19234e+06	9.32487e+06	5.55592e+06	9.42014e+06	1.12505e+07	1.04658e+07	14	14	14	14	14	13	13	14	10	15	14	15	14	14	14	14	14	13	13	14	10	15	14	15
P30681	97165	Hmgb2	FALSE	High mobility group protein B2 OS=Mus musculus OX=10090 GN=Hmgb2 PE=1 SV=3	51	10	149	8	64.325	442.98	10	24.1	1.58921e+07	3.50952e+07	3.38668e+07	3.38668e+07	3.55355e+07	5.05635e+07	2.52385e+07	2.634e+07	4.45763e+07	3.35142e+07	4.21625e+07	5.19187e+07	5.9689e+07	8	8	9	8	9	8	8	9	9	9	8	9	7	7	7	7	8	7	7	8	8	8	7	8
Q8BH97	52377	Rcn3	FALSE	Reticulocalbin-3 OS=Mus musculus OX=10090 GN=Rcn3 PE=1 SV=1	45	11	149	11	75.115	401.01	11	38	8.16571e+06	1.55044e+07	1.6575e+07	1.6575e+07	8.90919e+06	9.71059e+06	8.03684e+06	1.56261e+07	15152523	1.25375e+07	1.3367e+07	1.48623e+07	1.5773e+07	9	9	9	9	8	9	9	9	8	9	9	9	9	9	9	9	8	9	9	9	8	9	9	9
Q8BKZ9	27402	Pdhx	TRUE	Pyruvate dehydrogenase protein X component, mitochondrial OS=Mus musculus OX=10090 GN=Pdhx PE=1 SV=1	39	13	148	13	75.046	376.69	13	54	1.80204e+07	2.39516e+07	8.4686e+06	8.4686e+06	1.69673e+07	3.09006e+07	2.65586e+07	1.02673e+07	1.2915e+07	8.40161e+07	3.17396e+07	1.08092e+07	2.00365e+07	13	10	8	11	12	13	11	10	13	11	9	10	13	10	8	11	12	13	11	10	13	11	9	10
P34022	19385	Ranbp1	FALSE	Ran-specific GTPase-activating protein OS=Mus musculus OX=10090 GN=Ranbp1 PE=1 SV=2	64	11	148	11	46.851	408.15	11	23.6	4.60895e+07	7.52731e+07	7.46819e+07	7.46819e+07	4.88278e+07	6.56049e+07	3.90679e+07	5.4115e+07	6.60567e+07	6.14878e+07	5.91883e+07	6.5697e+07	7.39711e+07	9	9	10	10	10	10	9	10	10	10	10	11	9	9	10	10	10	10	9	10	10	10	10	11
P18242	13033	Ctsd	FALSE	Cathepsin D OS=Mus musculus OX=10090 GN=Ctsd PE=1 SV=1	37	11	148	11	53.157	385.48	11	44.9	1.70326e+07	3.48617e+07	1.57395e+07	1.57395e+07	2.40895e+07	5.35539e+07	2.58604e+07	1.28983e+07	2.25392e+07	44202564	3.42338e+07	1.47865e+07	3.22647e+07	11	10	10	11	11	11	10	11	11	11	9	11	11	10	10	11	11	11	10	11	11	11	9	11
O08800	20725	Serpinb8	FALSE	Serpin B8 OS=Mus musculus OX=10090 GN=Serpinb8 PE=1 SV=2	35	12	148	12	56.056	379.37	12	42.1	1.19672e+07	1.16935e+07	1.6109e+07	1.6109e+07	1.65634e+07	1.51446e+07	1.07585e+07	1.87608e+07	2.27316e+07	1.48544e+07	1.67317e+07	3.91491e+07	2.98136e+07	10	9	9	10	10	11	11	11	9	10	11	12	10	9	9	10	10	11	11	11	9	10	11	12
Q05186	19672	Rcn1	FALSE	Reticulocalbin-1 OS=Mus musculus OX=10090 GN=Rcn1 PE=1 SV=1	51	14	148	14	81.107	365.36	14	38.1	1.8267e+07	3.21923e+07	3.36108e+07	3.36108e+07	2.41902e+07	3.13454e+07	1.8208e+07	2.75835e+07	3.52543e+07	2.37054e+07	3.0072e+07	4.45284e+07	3.62428e+07	14	14	13	14	14	14	14	14	13	14	14	14	14	14	13	14	14	14	14	14	13	14	14	14
Q9JJU8	56726	Sh3bgrl	FALSE	SH3 domain-binding glutamic acid-rich-like protein OS=Mus musculus OX=10090 GN=Sh3bgrl PE=1 SV=1	84	10	147	10	54.191	396.69	10	12.8	2.34977e+07	4.03179e+07	26833913	26833913	2.88394e+07	3.94954e+07	3.07299e+07	2.0964e+07	3.28262e+07	4.48982e+07	3.49395e+07	2.36948e+07	3.20026e+07	10	10	10	10	10	10	10	10	10	10	10	10	10	10	10	10	10	10	10	10	10	10	10	10
Q8VDZ4	228136	Zdhhc5	FALSE	Palmitoyltransferase ZDHHC5 OS=Mus musculus OX=10090 GN=Zdhhc5 PE=1 SV=1	25	12	147	12	61.835	458.01	12	77.5	5.64072e+06	1.34074e+07	1.03658e+07	1.03658e+07	6.80274e+06	8.95915e+06	5.00298e+06	1.01578e+07	9.39184e+06	6.85673e+06	6.67287e+06	1.11169e+07	8.08538e+06	12	12	12	11	11	11	12	11	12	11	12	12	12	12	12	11	11	11	12	11	12	11	12	12
P97478	12850	Coq7	TRUE	5-demethoxyubiquinone hydroxylase, mitochondrial OS=Mus musculus OX=10090 GN=Coq7 PE=1 SV=3	51	9	147	9	65.183	424.64	9	24	2.16074e+07	2.17483e+07	1.60152e+07	1.60152e+07	1.53812e+07	2.53686e+07	2.14063e+07	1.13097e+07	1.01587e+07	2.32366e+07	2.57305e+07	7.83997e+06	1.98921e+07	9	9	9	9	9	9	9	8	8	9	7	9	9	9	9	9	9	9	9	8	8	9	7	9
P62858	54127	Rps28	FALSE	40S ribosomal protein S28 OS=Mus musculus OX=10090 GN=Rps28 PE=1 SV=1	46	3	147	3	15.659	371.6	3	7.8	2.06632e+08	3.58411e+08	2.24395e+08	2.24395e+08	2.0838e+08	2.55127e+08	1.85004e+08	2.39924e+08	2.63741e+08	2.82602e+08	2.59619e+08	2.31653e+08	2.66077e+08	3	3	3	3	3	3	3	3	3	3	3	3	3	3	3	3	3	3	3	3	3	3	3	3
Q91VM9	74776	Ppa2	TRUE	Inorganic pyrophosphatase 2, mitochondrial OS=Mus musculus OX=10090 GN=Ppa2 PE=1 SV=1	61	18	146	18	79.19	400.76	18	38.1	1.76847e+07	2.50596e+07	5.91913e+06	5.91913e+06	1.54648e+07	3.16831e+07	3.13822e+07	9.71244e+06	9.27985e+06	7.55703e+07	4.13137e+07	6.7753e+06	1.73205e+07	16	17	12	17	15	16	15	14	18	16	15	15	16	17	12	17	15	16	15	14	18	16	15	15
Q91XV3	70350	Basp1	FALSE	Brain acid soluble protein 1 OS=Mus musculus OX=10090 GN=Basp1 PE=1 SV=3	78	12	146	12	59.148	479.83	12	22.1	2.81311e+06	3.32194e+06	4.98298e+06	4.98298e+06	3.75816e+06	4.18927e+06	2.02671e+06	3.95535e+06	9.36977e+06	2.99161e+06	3.59837e+06	4.13918e+06	9.07241e+06	10	8	12	8	9	9	11	11	9	8	10	11	10	8	12	8	9	9	11	11	9	8	10	11
P21614	14473	Gc	FALSE	Vitamin D-binding protein OS=Mus musculus OX=10090 GN=Gc PE=1 SV=2	39	16	146	16	71.208	413.52	16	53.6	3.2478e+07	4.74102e+07	8.09436e+06	8.09436e+06	3.59947e+07	5.02475e+07	6.87363e+07	9.93878e+06	1.19372e+07	1.30068e+08	5.62468e+07	9.96616e+06	2.5479e+07	13	13	7	13	13	13	10	11	16	13	9	13	13	13	7	13	13	13	10	11	16	13	9	13
Q8R5M8	54725	Cadm1	FALSE	Cell adhesion molecule 1 OS=Mus musculus OX=10090 GN=Cadm1 PE=1 SV=2	36	11	145	11	63.989	447.17	11	49.8	9.40389e+06	1.32317e+07	1.76692e+07	1.76692e+07	1.31637e+07	1.26894e+07	7.59517e+06	1.20564e+07	1.34576e+07	1.45932e+07	1.38806e+07	1.58453e+07	1.70744e+07	10	9	11	11	9	8	11	11	10	11	11	10	10	9	11	11	9	8	11	11	10	11	11	10
Q9CQX8	66128	Mrps36	TRUE	28S ribosomal protein S36, mitochondrial OS=Mus musculus OX=10090 GN=Mrps36 PE=1 SV=1	71	5	145	5	75.72	448.37	5	11.1	3.14312e+07	7.01661e+07	8.03643e+07	8.03643e+07	4.73351e+07	6.09925e+07	4.14872e+07	7.42056e+07	7.23367e+07	8.46527e+07	6.04483e+07	1.0112e+08	7.79118e+07	5	5	5	5	5	5	5	5	5	5	5	5	5	5	5	5	5	5	5	5	5	5	5	5
P68510	22629	Ywhah	FALSE	14-3-3 protein eta OS=Mus musculus OX=10090 GN=Ywhah PE=1 SV=2	49	12	145	6	53.522	353.76	12	28.2	2.15556e+06	5.18272e+06	7.23078e+06	7.23078e+06	4.22072e+06	2.6322e+06	4.78582e+06	4.36826e+06	2.71419e+06	6.65102e+06	5.30598e+06	3.53872e+06	5.86158e+06	11	12	9	11	12	12	8	9	12	12	10	11	5	6	4	6	6	6	3	4	6	6	5	6
P99029	54683	Prdx5	TRUE	Peroxiredoxin-5, mitochondrial OS=Mus musculus OX=10090 GN=Prdx5 PE=1 SV=2	57	12	145	12	57.875	421.24	12	21.9	4.53599e+07	9.24415e+07	3.68517e+07	3.68517e+07	4.52255e+07	8.46008e+07	6.57546e+07	3.106e+07	3.42476e+07	1.66899e+08	7.2257e+07	2.21227e+07	4.40462e+07	10	11	10	11	12	12	11	11	12	11	10	11	10	11	10	11	12	12	11	11	12	11	10	11
P52503	407785	Ndufs6	TRUE	NADH dehydrogenase [ubiquinone] iron-sulfur protein 6, mitochondrial OS=Mus musculus OX=10090 GN=Ndufs6 PE=1 SV=2	65	8	145	8	47.289	423.4	8	13	1.12401e+08	1.89682e+08	2.06413e+08	2.06413e+08	1.3074e+08	1.41511e+08	1.09856e+08	7.96838e+07	9.15498e+07	3.86376e+07	8.94501e+07	4.01459e+07	1.12742e+08	8	8	8	8	8	8	8	8	8	8	8	8	8	8	8	8	8	8	8	8	8	8	8	8
Q9Z2M7	54128	Pmm2	FALSE	Phosphomannomutase 2 OS=Mus musculus OX=10090 GN=Pmm2 PE=1 SV=1	52	12	145	12	58.862	357.97	12	27.6	1.7933e+07	2.60788e+07	8.77216e+06	8.77216e+06	1.78327e+07	2.58942e+07	2.23965e+07	8.12923e+06	8.97357e+06	4.15558e+07	2.68106e+07	6.12864e+06	1.60932e+07	11	11	11	12	11	12	11	11	12	12	11	11	11	11	11	12	11	12	11	11	12	12	11	11
Q9Z0U1	21873	Tjp2	FALSE	Tight junction protein ZO-2 OS=Mus musculus OX=10090 GN=Tjp2 PE=1 SV=2	28	23	145	22	92.723	373.15	23	131.2	7.52555e+06	1.36801e+07	6.24241e+06	6.24241e+06	6.32292e+06	1.06948e+07	6.8679e+06	8.74079e+06	7.57726e+06	8.0309e+06	8.44883e+06	8.01137e+06	7.78609e+06	21	22	15	19	20	20	19	18	17	22	20	20	20	21	14	18	19	19	18	17	16	21	19	19
O09159	17159	Man2b1	FALSE	Lysosomal alpha-mannosidase OS=Mus musculus OX=10090 GN=Man2b1 PE=1 SV=4	15	14	145	14	54.937	406.28	14	114.6	1.49685e+07	3.14742e+07	2.35316e+07	2.35316e+07	2.13791e+07	3.10388e+07	1.97447e+07	1.66253e+07	2.06929e+07	2.97343e+07	2.29813e+07	1.76011e+07	2.94254e+07	12	12	7	13	13	14	11	9	11	14	8	14	12	12	7	13	13	14	11	9	11	14	8	14
Q9D0M3	66445	Cyc1	TRUE	Cytochrome c1, heme protein, mitochondrial OS=Mus musculus OX=10090 GN=Cyc1 PE=1 SV=1	49	10	144	10	66.105	379.08	10	35.3	6.14531e+07	8.9162e+07	4.35374e+07	4.35374e+07	5.90851e+07	1.22916e+08	9.42572e+07	4.07906e+07	4.25776e+07	2.4363e+08	1.09756e+08	4.65639e+07	6.8485e+07	9	9	8	8	9	10	7	7	10	10	7	9	9	9	8	8	9	10	7	7	10	10	7	9
Q9CQV1	66449	Pam16	TRUE	Mitochondrial import inner membrane translocase subunit TIM16 OS=Mus musculus OX=10090 GN=Pam16 PE=1 SV=1	75	9	144	9	40.625	423.5	9	13.8	2.39394e+07	38690389	3.15576e+07	3.15576e+07	2.03589e+07	2.70411e+07	1.72695e+07	3.49272e+07	3.46753e+07	4.23965e+07	2.71495e+07	4.29014e+07	3.00441e+07	9	8	8	8	8	8	9	8	8	9	9	9	9	8	8	8	8	8	9	8	8	9	9	9
Q3THK3	98053	Gtf2f1	FALSE	General transcription factor IIF subunit 1 OS=Mus musculus OX=10090 GN=Gtf2f1 PE=1 SV=2	29	14	144	14	74.035	410.91	14	57.2	6.08344e+06	1.06387e+07	9.31303e+06	9.31303e+06	6.65619e+06	1.02599e+07	5.41615e+06	8.77593e+06	9.62018e+06	8.73933e+06	8.18278e+06	8.43254e+06	8.30064e+06	14	14	14	14	14	14	14	14	14	14	14	14	14	14	14	14	14	14	14	14	14	14	14	14
O35326	20384	Srsf5	FALSE	Serine/arginine-rich splicing factor 5 OS=Mus musculus OX=10090 GN=Srsf5 PE=1 SV=2	28	9	144	8	36.49	394.95	9	30.9	6.47713e+07	1.13956e+08	8.64489e+07	8.64489e+07	6.1692e+07	9.93112e+07	5.9676e+07	6.73718e+07	9.00318e+07	1.19503e+08	1.01019e+08	2.44907e+07	4.0102e+07	9	9	9	9	9	9	9	9	9	9	9	8	8	8	8	8	8	8	8	8	8	8	8	7
Q9Z2Q5	18100	Mrpl40	TRUE	39S ribosomal protein L40, mitochondrial OS=Mus musculus OX=10090 GN=Mrpl40 PE=1 SV=2	49	10	144	10	56.467	425.72	10	24.3	2.52013e+07	4.72499e+07	4.99708e+07	4.99708e+07	2.342e+07	3.20922e+07	1.79122e+07	5.19708e+07	4.66636e+07	6.0657e+07	3.27433e+07	4.92954e+07	3.48126e+07	10	10	10	10	10	10	10	10	10	10	10	10	10	10	10	10	10	10	10	10	10	10	10	10
Q6IRU5	74325	Cltb	FALSE	Clathrin light chain B OS=Mus musculus OX=10090 GN=Cltb PE=1 SV=1	29	11	144	11	36.364	342.1	11	25.2	1.19971e+08	214332191	1.95223e+08	1.95223e+08	1.44073e+08	1.89074e+08	1.02278e+08	1.88204e+08	2.2081e+08	1.52075e+08	1.51132e+08	2.00741e+08	1.70038e+08	11	11	11	11	11	11	11	11	11	11	11	11	11	11	11	11	11	11	11	11	11	11	11	11
Q61249	18518	Igbp1	FALSE	Immunoglobulin-binding protein 1 OS=Mus musculus OX=10090 GN=Igbp1 PE=1 SV=1	40	11	144	11	62.727	419.1	11	38.9	1.97706e+07	3.88489e+07	1.89339e+07	1.89339e+07	1.8688e+07	2.62761e+07	20404023	1.78376e+07	2.01256e+07	2.98114e+07	2.2789e+07	2.01273e+07	23820465	11	11	9	11	11	10	11	10	11	10	10	11	11	11	9	11	11	10	11	10	11	10	10	11
Q9QUI0	11848	Rhoa	FALSE	Transforming protein RhoA OS=Mus musculus OX=10090 GN=Rhoa PE=1 SV=1	71	10	143	8	60.372	397.89	10	21.8	1.60032e+07	2.5266e+07	1.04142e+07	1.04142e+07	1.70662e+07	2.77808e+07	2.58658e+07	8.61728e+06	1.23785e+07	4.78049e+07	3.13151e+07	1.07709e+07	1.95882e+07	9	10	9	10	10	10	9	10	10	10	9	10	7	8	7	8	8	8	7	8	8	8	7	8
Q91YD9	73178	Wasl	FALSE	Neural Wiskott-Aldrich syndrome protein OS=Mus musculus OX=10090 GN=Wasl PE=1 SV=1	34	10	143	10	37.923	425.06	10	54.2	1.24323e+07	2.611e+07	2.19907e+07	2.19907e+07	1.61128e+07	1.79833e+07	1.22225e+07	2.10601e+07	2.22619e+07	1.62717e+07	1.66524e+07	2.61568e+07	1.89322e+07	9	10	9	9	10	9	10	10	10	10	10	10	9	10	9	9	10	9	10	10	10	10	10	10
Q6NZF1	70579	Zc3h11a	FALSE	Zinc finger CCCH domain-containing protein 11A OS=Mus musculus OX=10090 GN=Zc3h11a PE=1 SV=1	31	17	143	17	74.291	390.63	17	86.4	3.05422e+07	4.75436e+07	2.16236e+07	2.16236e+07	2.99684e+07	7.65855e+07	4.89247e+07	3.25833e+07	2.79575e+07	6.0549e+07	5.14267e+07	3.45658e+07	3.83751e+07	15	16	13	15	14	15	15	16	15	14	16	15	15	16	13	15	14	15	15	16	15	14	16	15
Q61823	18569	Pdcd4	FALSE	Programmed cell death protein 4 OS=Mus musculus OX=10090 GN=Pdcd4 PE=1 SV=1	49	18	143	18	86.411	364.83	18	51.7	2.00803e+07	2.73605e+07	1.00667e+07	1.00667e+07	1.65815e+07	4.04448e+07	3.1003e+07	7.94151e+06	6.76531e+06	4.58616e+07	3.53022e+07	5.56683e+06	3.1602e+07	16	16	13	16	18	18	14	13	19	18	11	18	16	16	13	16	18	18	14	13	19	18	11	18
Q8R1V4	103694	Tmed4	FALSE	Transmembrane emp24 domain-containing protein 4 OS=Mus musculus OX=10090 GN=Tmed4 PE=1 SV=1	45	10	143	9	50.019	338.5	10	26	2.29584e+07	3.33897e+07	1.51321e+07	1.51321e+07	1.82537e+07	3.04946e+07	2.38994e+07	1.42824e+07	1.64413e+07	4.30867e+07	3.17569e+07	9.08998e+06	2.31475e+07	10	10	10	10	10	10	10	10	10	10	10	10	9	9	9	9	9	9	9	9	9	9	9	9
Q3UPL0	69162	Sec31a	FALSE	Protein transport protein Sec31A OS=Mus musculus OX=10090 GN=Sec31a PE=1 SV=2	12	11	142	11	48.847	355.16	11	133.5	3.80388e+07	7.5768e+07	5.45139e+07	5.45139e+07	3.67644e+07	5.84665e+07	3.39534e+07	5.80556e+07	5.8779e+07	3.76147e+07	5.06827e+07	6.54361e+07	5.88111e+07	10	11	10	10	10	9	10	10	10	10	11	11	10	11	10	10	10	9	10	10	10	10	11	11
Q8C7E7	52331	Stbd1	FALSE	Starch-binding domain-containing protein 1 OS=Mus musculus OX=10090 GN=Stbd1 PE=1 SV=1	36	10	142	10	55.609	378.12	10	36.1	3.56503e+07	7.86567e+07	4.85487e+07	4.85487e+07	2.38915e+07	3.95302e+07	2.96741e+07	4.52939e+07	5.52784e+07	5.18408e+07	3.031e+07	4.46447e+07	4.061e+07	10	9	9	9	9	10	9	10	10	9	9	10	10	9	9	9	9	10	9	10	10	9	9	10
Q63850	18226	Nup62	FALSE	Nuclear pore glycoprotein p62 OS=Mus musculus OX=10090 GN=Nup62 PE=1 SV=2	27	13	142	13	68.231	439.31	13	53.2	1.92837e+07	3.3808e+07	3.57339e+07	3.57339e+07	2.2698e+07	2.80701e+07	1.62234e+07	2.65384e+07	2.99798e+07	2.67298e+07	2.37713e+07	3.45391e+07	2.93172e+07	11	11	13	12	11	12	11	13	12	12	12	13	11	11	13	12	11	12	11	13	12	12	12	13
P62843	20054	Rps15	FALSE	40S ribosomal protein S15 OS=Mus musculus OX=10090 GN=Rps15 PE=1 SV=2	70	7	142	7	76.835	427.45	7	17	1.81749e+07	3.14144e+07	2.49147e+07	2.49147e+07	1.4406e+07	2.04329e+07	1.94753e+07	2.254e+07	1.81093e+07	3.81957e+07	2.90508e+07	1.7631e+07	2.59951e+07	7	7	7	7	7	7	7	7	7	7	7	7	7	7	7	7	7	7	7	7	7	7	7	7
P58044	319554	Idi1	TRUE	Isopentenyl-diphosphate Delta-isomerase 1 OS=Mus musculus OX=10090 GN=Idi1 PE=1 SV=1	53	12	142	12	60.592	344.78	12	26.3	1.99547e+07	5.57862e+07	1.37364e+07	1.37364e+07	2.63364e+07	6.58508e+07	6.64242e+07	1.26918e+07	1.2954e+07	6.61104e+07	6.22234e+07	9.01195e+06	3.23835e+07	10	11	10	12	12	12	10	10	12	12	10	11	10	11	10	12	12	12	10	10	12	12	10	11
Q9CQK7	66521	Rwdd1	FALSE	RWD domain-containing protein 1 OS=Mus musculus OX=10090 GN=Rwdd1 PE=1 SV=1	47	10	142	10	58.183	396.56	10	27.8	1.32253e+07	2.59925e+07	2.73747e+07	2.73747e+07	1.33264e+07	1.77105e+07	1.18128e+07	2.10402e+07	2.38614e+07	2.08692e+07	1.6556e+07	2.19773e+07	2.23043e+07	9	9	10	9	9	9	9	9	9	9	9	9	9	9	10	9	9	9	9	9	9	9	9	9
Q9Z130	50926	Hnrnpdl	FALSE	Heterogeneous nuclear ribonucleoprotein D-like OS=Mus musculus OX=10090 GN=Hnrnpdl PE=1 SV=1	38	10	142	8	51.14	328.16	10	33.5	2.99686e+07	5.12514e+07	4.08663e+07	4.08663e+07	2.88551e+07	3.42313e+07	2.68549e+07	3.00636e+07	3.67898e+07	4.4365e+07	4.27682e+07	3.42562e+07	3.37425e+07	9	9	10	10	10	9	9	10	10	9	9	9	7	7	8	8	8	7	7	8	8	7	7	7
Q920A5	74617	Scpep1	FALSE	Retinoid-inducible serine carboxypeptidase OS=Mus musculus OX=10090 GN=Scpep1 PE=1 SV=2	25	10	142	10	55.909	374.44	10	50.9	2.62551e+07	4.23326e+07	1.31413e+07	1.31413e+07	3.62832e+07	6.7171e+07	3.79411e+07	1.23267e+07	1.48966e+07	4.74022e+07	4.59415e+07	9.19827e+06	3.26299e+07	10	10	8	9	9	10	8	9	9	10	8	10	10	10	8	9	9	10	8	9	9	10	8	10
P54227	16765	Stmn1	FALSE	Stathmin OS=Mus musculus OX=10090 GN=Stmn1 PE=1 SV=2	68	12	142	12	39.767	340.54	12	17.3	1.7085e+07	3.04098e+07	3.19718e+07	3.19718e+07	2.39138e+07	2.67145e+07	1.76828e+07	2.72582e+07	5.22473e+07	2.2108e+07	2.10377e+07	3.05142e+07	2.4827e+07	12	12	12	12	12	12	11	12	12	12	12	12	12	12	12	12	12	12	11	12	12	12	12	12
P62192	19179	Psmc1	FALSE	26S proteasome regulatory subunit 4 OS=Mus musculus OX=10090 GN=Psmc1 PE=1 SV=1	44	15	142	13	62.434	408.5	15	49.2	1.36453e+07	1.98477e+07	5.52972e+06	5.52972e+06	1.37071e+07	2.34377e+07	20516943	3.72912e+06	4.61513e+06	3.12063e+07	2.01452e+07	3.19481e+06	9.53668e+06	15	13	10	13	13	14	9	10	15	14	10	13	13	11	9	11	11	12	7	8	13	12	9	11
Q8K310	17184	Matr3	FALSE	Matrin-3 OS=Mus musculus OX=10090 GN=Matr3 PE=1 SV=1	22	15	142	15	68.771	441.14	15	94.6	9.39241e+06	2.19185e+07	1.4762e+07	1.4762e+07	9.68482e+06	2.01294e+07	9.53419e+06	1.17861e+07	1.84231e+07	1.25047e+07	1.24605e+07	2.47277e+07	1.35567e+07	14	15	15	14	15	14	13	15	14	14	15	15	14	15	15	14	15	14	13	15	14	14	15	15
P15105	14645	Glul	FALSE	Glutamine synthetase OS=Mus musculus OX=10090 GN=Glul PE=1 SV=6	31	11	142	11	52.407	406.38	11	42.1	1.29436e+07	2.37521e+07	1.16859e+07	1.16859e+07	1.51093e+07	29968756	1.65227e+07	1.33671e+07	1.6167e+07	2.11506e+07	2.79375e+07	2.45003e+07	2.30431e+07	10	10	10	11	11	11	10	10	11	11	11	11	10	10	10	11	11	11	10	10	11	11	11	11
P61759	22327	Vbp1	FALSE	Prefoldin subunit 3 OS=Mus musculus OX=10090 GN=Vbp1 PE=1 SV=2	54	10	141	10	43.85	337.78	10	22.4	1.26871e+07	2.1932e+07	1.309e+07	1.309e+07	1.49109e+07	1.99004e+07	1.51281e+07	1.30635e+07	1.49444e+07	2.40196e+07	2.09438e+07	1.27846e+07	1.95701e+07	10	10	10	10	10	10	10	10	10	10	10	10	10	10	10	10	10	10	10	10	10	10	10	10
Q80VJ2	24068	Sra1	FALSE	Steroid receptor RNA activator 1 OS=Mus musculus OX=10090 GN=Sra1 PE=1 SV=3	47	10	141	10	73.532	412.67	10	25.5	11899153	1.61289e+07	1.68938e+07	1.68938e+07	9.34977e+06	1.03639e+07	7.46346e+06	1.60176e+07	1.90824e+07	1.71587e+07	1.62422e+07	1.84494e+07	1.59915e+07	10	10	10	10	10	10	10	10	10	10	10	10	10	10	10	10	10	10	10	10	10	10	10	10
O89086	19652	Rbm3	FALSE	RNA-binding protein 3 OS=Mus musculus OX=10090 GN=Rbm3 PE=1 SV=1	67	7	141	7	47.754	374.03	7	16.6	2.6547e+07	4.00852e+07	3.91065e+07	3.91065e+07	2.59303e+07	2.51128e+07	2.53504e+07	3.35681e+07	5.42835e+07	3.8829e+07	3.46957e+07	3.88224e+07	4.41485e+07	7	7	7	7	7	7	7	7	7	7	7	7	7	7	7	7	7	7	7	7	7	7	7	7
Q8BHC0	114332	Lyve1	FALSE	Lymphatic vessel endothelial hyaluronic acid receptor 1 OS=Mus musculus OX=10090 GN=Lyve1 PE=1 SV=1	19	8	141	8	34.503	310.89	8	34.6	1.72655e+07	3.12735e+07	2.42424e+07	2.42424e+07	2.67193e+07	6.72807e+07	5.27275e+07	9.22423e+06	1.51355e+07	9.20641e+07	4.30011e+07	1.15274e+07	2.45997e+07	8	8	8	8	8	8	8	8	8	8	8	8	8	8	8	8	8	8	8	8	8	8	8	8
Q8VDD8	68767	Washc1	FALSE	WASH complex subunit 1 OS=Mus musculus OX=10090 GN=Washc1 PE=1 SV=1	39	13	141	13	61.308	432.67	13	51.6	1.33384e+07	1.65625e+07	1.69987e+07	1.69987e+07	9.30396e+06	1.26289e+07	9.15189e+06	1.12347e+07	1.34477e+07	1.70795e+07	1.75132e+07	1.38236e+07	1.85405e+07	11	13	13	12	13	11	12	12	13	13	12	13	11	13	13	12	13	11	12	12	13	13	12	13
Q8C7E9	83410	Cstf2t	FALSE	Cleavage stimulation factor subunit 2 tau variant OS=Mus musculus OX=10090 GN=Cstf2t PE=1 SV=2	31	13	141	5	60.147	404.71	13	65.8	1.85657e+06	2.36332e+06	1.74313e+06	1.74313e+06	2.28563e+06	2.48582e+06	1.26259e+06	2.12516e+06	1.85024e+06	1.92418e+06	1.67088e+06	2.90784e+06	3.05048e+06	10	11	11	12	10	9	12	11	11	9	12	12	4	4	4	4	4	3	5	5	4	3	4	5
Q9WV02	19655	Rbmx	FALSE	RNA-binding motif protein, X chromosome OS=Mus musculus OX=10090 GN=Rbmx PE=1 SV=1	33	13	141	1	48.583	267.13	13	42.3	1261722	2.11719e+06	1.29056e+06	1.29056e+06	1.18154e+06	1.69306e+06	1.33562e+06	1.58661e+06	1.31596e+06	765025	1137530	2016955	1.4548e+06	13	13	13	13	13	13	13	13	13	13	13	13	1	1	1	1	1	1	1	1	1	1	1	1
Q6P6J9	69672	Txndc15	FALSE	Thioredoxin domain-containing protein 15 OS=Mus musculus OX=10090 GN=Txndc15 PE=1 SV=1	42	9	141	9	71.406	456.31	9	38.1	1.88666e+07	1.77018e+07	2.28735e+07	2.28735e+07	1.48834e+07	1.19968e+07	7.08876e+06	1.56662e+07	1.71193e+07	1.65105e+07	1.45519e+07	1.80134e+07	1.72994e+07	7	7	8	8	6	7	8	9	8	8	9	7	7	7	8	8	6	7	8	9	8	8	9	7
Q60739	12017	Bag1	FALSE	BAG family molecular chaperone regulator 1 OS=Mus musculus OX=10090 GN=Bag1 PE=1 SV=3	37	11	140	11	60.682	371.51	11	39.7	1.14441e+07	1.62568e+07	1.56159e+07	1.56159e+07	9.06417e+06	9.68402e+06	8.47394e+06	1.23468e+07	1.5571e+07	1.32397e+07	1.09256e+07	1.26718e+07	1.4732e+07	10	10	10	10	10	11	11	10	10	11	10	10	10	10	10	10	10	11	11	10	10	11	10	10
Q8BWW4	207214	Larp4	FALSE	La-related protein 4 OS=Mus musculus OX=10090 GN=Larp4 PE=1 SV=2	31	16	140	16	71.429	387.52	16	79.7	1.52275e+07	2.58477e+07	2.52855e+07	2.52855e+07	1.54288e+07	2.05386e+07	1.26929e+07	2.09608e+07	2.16508e+07	1.46781e+07	1.53284e+07	1.81028e+07	1.58635e+07	15	14	14	13	15	13	14	13	13	13	13	14	15	14	14	13	15	13	14	13	13	13	13	14
P16045	16852	Lgals1	FALSE	Galectin-1 OS=Mus musculus OX=10090 GN=Lgals1 PE=1 SV=3	92	9	140	9	47.289	336.88	9	14.9	1.68248e+07	4.28926e+07	2.9882e+07	2.9882e+07	2.76237e+07	3.46679e+07	3.28121e+07	2.68078e+07	3.80197e+07	7.45038e+07	3.59379e+07	2.19512e+07	4.063e+07	7	7	7	8	7	7	7	8	9	8	8	8	7	7	7	8	7	7	7	8	9	8	8	8
Q99L45	67204	Eif2s2	FALSE	Eukaryotic translation initiation factor 2 subunit 2 OS=Mus musculus OX=10090 GN=Eif2s2 PE=1 SV=1	41	13	140	13	61.623	387.79	13	38.1	1.34905e+07	2.83961e+07	2.08403e+07	2.08403e+07	1.39618e+07	1.67755e+07	1.25137e+07	2.27896e+07	1.85203e+07	1.57192e+07	1.52967e+07	2.15462e+07	1.60168e+07	12	12	11	12	11	11	11	12	10	12	13	11	12	12	11	12	11	11	11	12	10	12	13	11
Q60974	20185	Ncor1	FALSE	Nuclear receptor corepressor 1 OS=Mus musculus OX=10090 GN=Ncor1 PE=1 SV=1	12	23	140	21	81.176	321.96	23	270.5	3.91431e+06	7.48191e+06	4263858	4263858	3.85656e+06	5.70478e+06	3.61358e+06	5.38334e+06	5.21316e+06	2.92722e+06	3.893e+06	5.23243e+06	5.61903e+06	20	21	17	20	20	18	19	20	14	18	21	21	18	19	15	18	18	16	17	18	12	16	19	19
O88384	53612	Vti1b	FALSE	Vesicle transport through interaction with t-SNAREs homolog 1B OS=Mus musculus OX=10090 GN=Vti1b PE=1 SV=1	50	10	140	10	39.895	364.78	10	26.7	2.01529e+07	3.36402e+07	3.06387e+07	3.06387e+07	1.92538e+07	2.61945e+07	1.69776e+07	2.47081e+07	2.78025e+07	2.64149e+07	2.62713e+07	3.22344e+07	30234325	10	10	10	10	10	10	10	10	10	10	10	10	10	10	10	10	10	10	10	10	10	10	10	10
Q9DCW4	110826	Etfb	TRUE	Electron transfer flavoprotein subunit beta OS=Mus musculus OX=10090 GN=Etfb PE=1 SV=3	41	11	140	11	42.694	407.5	11	27.6	3.29419e+07	5.6589e+07	4.39483e+07	4.39483e+07	3.56597e+07	5.99327e+07	39487153	4.82474e+07	4.09198e+07	8.50019e+07	5.16513e+07	6.54574e+07	4.99691e+07	11	10	10	10	10	10	10	9	11	10	9	10	11	10	10	10	10	10	10	9	11	10	9	10
P46467	20479	Vps4b	FALSE	Vacuolar protein sorting-associated protein 4B OS=Mus musculus OX=10090 GN=Vps4b PE=1 SV=2	40	16	139	13	75.661	365.78	16	49.4	1.18838e+07	1.78792e+07	7.90974e+06	7.90974e+06	1.11196e+07	1.92815e+07	1.58571e+07	7.21495e+06	8.16988e+06	2.0843e+07	1.95638e+07	5.94616e+06	1.41594e+07	14	15	13	15	14	15	12	12	15	16	12	15	11	12	10	12	11	12	9	9	12	13	9	12
Q9EST5	67628	Anp32b	FALSE	Acidic leucine-rich nuclear phosphoprotein 32 family member B OS=Mus musculus OX=10090 GN=Anp32b PE=1 SV=1	39	10	139	6	30.309	341.02	10	31.1	3.30207e+07	5.71658e+07	4.92286e+07	4.92286e+07	3.4702e+07	4.85066e+07	3.04587e+07	3.76525e+07	4.03676e+07	5.09669e+07	4.21863e+07	4.00176e+07	4.31452e+07	9	9	9	9	9	9	9	9	9	9	9	9	5	5	5	5	5	5	5	5	5	5	5	5
Q9WU28	56612	Pfdn5	FALSE	Prefoldin subunit 5 OS=Mus musculus OX=10090 GN=Pfdn5 PE=1 SV=1	72	8	139	8	47.647	396.12	8	17.3	1.00648e+07	1.74942e+07	1.11718e+07	1.11718e+07	9.86722e+06	1.55323e+07	1.01019e+07	8.63414e+06	9.53828e+06	1.90634e+07	1.41899e+07	9.05151e+06	1.50906e+07	8	8	7	7	7	6	7	8	7	8	8	8	8	8	7	7	7	6	7	8	7	8	8	8
Q9EP71	75646	Rai14	FALSE	Ankycorbin OS=Mus musculus OX=10090 GN=Rai14 PE=1 SV=1	25	20	139	20	77.79	357.36	20	108.8	5.15194e+06	1.06645e+07	4.54381e+06	4.54381e+06	5.98419e+06	1.32588e+07	7.30936e+06	5.80358e+06	4.67593e+06	6.32394e+06	7.13217e+06	6.47994e+06	6.38714e+06	19	18	13	19	19	19	18	14	15	19	17	18	19	18	13	19	19	19	18	14	15	19	17	18
Q9D7M1	76425	Gid8	FALSE	Glucose-induced degradation protein 8 homolog OS=Mus musculus OX=10090 GN=Gid8 PE=1 SV=1	66	10	139	10	57.535	436.96	10	26.8	1.18042e+07	1.84507e+07	1.35896e+07	1.35896e+07	9.87986e+06	1.25048e+07	8.01758e+06	1.19111e+07	1.38635e+07	1.67914e+07	1.26051e+07	9.86058e+06	1.55047e+07	10	8	8	8	8	8	9	8	8	8	8	9	10	8	8	8	8	8	9	8	8	8	8	9
P59017	94044	Bcl2l13	TRUE	Bcl-2-like protein 13 OS=Mus musculus OX=10090 GN=Bcl2l13 PE=1 SV=2	47	15	139	15	70.198	402.43	15	46.7	2.48411e+07	3.51149e+07	1.76979e+07	1.76979e+07	2.48301e+07	3.89305e+07	1.92961e+07	2.49701e+07	2.15696e+07	4.97651e+07	3.6498e+07	3.05463e+07	2.57662e+07	13	12	10	13	13	13	12	12	14	14	11	13	13	12	10	13	13	13	12	12	14	14	11	13
Q9CQ60	66171	Pgls	FALSE	6-phosphogluconolactonase OS=Mus musculus OX=10090 GN=Pgls PE=1 SV=1	71	11	139	11	65.11	462.76	11	27.2	2.17619e+07	2.96218e+07	6.23209e+06	6.23209e+06	1.94432e+07	4.45233e+07	4.35462e+07	5.27643e+06	6.24366e+06	7.36399e+07	35623888	3.41462e+06	1.52928e+07	11	11	8	11	11	11	9	9	11	11	9	11	11	11	8	11	11	11	9	9	11	11	9	11
P55264	11534	Adk	FALSE	Adenosine kinase OS=Mus musculus OX=10090 GN=Adk PE=1 SV=2	48	15	139	15	73.262	354.3	15	40.1	1.11904e+07	2.48269e+07	1.50827e+07	1.50827e+07	1.4878e+07	2.90988e+07	1.81787e+07	1.44396e+07	1.37895e+07	2.91677e+07	2.20863e+07	1.95661e+07	1.84405e+07	12	14	11	14	15	15	12	12	14	15	13	14	12	14	11	14	15	15	12	12	14	15	13	14
Q148V8	105732	Fam83h	FALSE	Protein FAM83H OS=Mus musculus OX=10090 GN=Fam83h PE=1 SV=1	21	18	139	18	77.23	386.78	18	131	3.35653e+06	8.95338e+06	1.092e+07	1.092e+07	4.40787e+06	6.72577e+06	3.98543e+06	6.97437e+06	8.3377e+06	3.73889e+06	4.63178e+06	8.79329e+06	7.8316e+06	15	16	17	15	15	15	16	18	12	15	16	17	15	16	17	15	15	15	16	18	12	15	16	17
Q99PG2	72075	Ogfr	FALSE	Opioid growth factor receptor OS=Mus musculus OX=10090 GN=Ogfr PE=1 SV=1	44	15	139	15	76.907	408.93	15	70.6	9.67672e+06	1.638e+07	1.79829e+07	1.79829e+07	1.75859e+07	1.22292e+07	9.96243e+06	1.31005e+07	1.6209e+07	1.19348e+07	1.43066e+07	2.12581e+07	1.93037e+07	14	13	13	13	13	11	11	13	12	13	13	14	14	13	13	13	13	11	11	13	12	13	13	14
Q64105	20751	Spr	TRUE	Sepiapterin reductase OS=Mus musculus OX=10090 GN=Spr PE=1 SV=1	52	11	138	11	63.646	387.51	11	27.9	1.47757e+07	1.81359e+07	5.13259e+06	5.13259e+06	1.91232e+07	3.56034e+07	3.318e+07	5.33401e+06	6.25606e+06	4.82796e+07	2.87841e+07	2.96567e+06	1.27711e+07	11	9	8	11	10	11	8	10	11	10	7	9	11	9	8	11	10	11	8	10	11	10	7	9
Q8BH43	242687	Wasf2	FALSE	Wiskott-Aldrich syndrome protein family member 2 OS=Mus musculus OX=10090 GN=Wasf2 PE=1 SV=1	21	10	138	10	42.447	387.42	10	54	2.03977e+07	3.31198e+07	4.22143e+07	4.22143e+07	24677850	2.90466e+07	1.8936e+07	2.808e+07	3.55174e+07	2.759e+07	2.53992e+07	3.60623e+07	3.35323e+07	10	9	9	9	9	9	10	10	10	10	10	10	10	9	9	9	9	9	10	10	10	10	10	10
C0HKD9	67532	Mfap1a	FALSE	Microfibrillar-associated protein 1B OS=Mus musculus OX=10090 GN=Mfap1b PE=1 SV=1	27	13	138	13	48.957	369.36	13	51.9	1.04701e+07	1.71115e+07	1.96253e+07	1.96253e+07	1.18006e+07	1.70718e+07	9.10001e+06	1.53768e+07	1.67829e+07	1.34037e+07	1.2666e+07	1.71192e+07	1.54017e+07	13	12	13	12	11	11	12	12	11	12	11	12	13	12	13	12	11	11	12	12	11	12	11	12
P97493	56551	Txn2	TRUE	Thioredoxin, mitochondrial OS=Mus musculus OX=10090 GN=Txn2 PE=1 SV=1	42	6	138	6	33.714	381	6	18.2	8.07423e+07	1.22051e+08	1.16675e+08	1.16675e+08	8.53907e+07	1.17214e+08	7.49563e+07	1.07117e+08	1.23695e+08	1.46051e+08	1.12344e+08	1.38629e+08	1.06023e+08	5	6	6	6	4	4	4	6	6	5	6	6	5	6	6	6	4	4	4	6	6	5	6	6
Q62376	20637	Snrnp70	FALSE	U1 small nuclear ribonucleoprotein 70 kDa OS=Mus musculus OX=10090 GN=Snrnp70 PE=1 SV=2	39	13	137	13	53.157	318.66	13	52	1.11737e+07	1.3767e+07	2.05393e+07	2.05393e+07	1.12488e+07	1.65322e+07	8.56588e+06	1.19142e+07	1.17022e+07	1.64175e+07	1.30797e+07	10515597	1.03809e+07	12	12	12	11	13	11	11	12	12	13	10	12	12	12	12	11	13	11	11	12	12	13	10	12
Q8BWM0	96979	Ptges2	TRUE	Prostaglandin E synthase 2 OS=Mus musculus OX=10090 GN=Ptges2 PE=1 SV=3	46	13	137	13	70.124	395.94	13	43.3	2.94127e+07	3.89879e+07	1.95454e+07	1.95454e+07	2.82116e+07	4.94179e+07	3.2581e+07	2.14173e+07	2.50423e+07	7.50675e+07	4.29035e+07	1.59158e+07	3.16926e+07	13	13	9	12	12	13	11	11	13	13	10	13	13	13	9	12	12	13	11	11	13	13	10	13
P48437	19130	Prox1	FALSE	Prospero homeobox protein 1 OS=Mus musculus OX=10090 GN=Prox1 PE=1 SV=2	19	12	137	12	60.661	384.96	12	83.1	4.91908e+06	9.85595e+06	6.36561e+06	6.36561e+06	4.87146e+06	5.9027e+06	4.21509e+06	7.52333e+06	5.53188e+06	6.11955e+06	4.72323e+06	8.10075e+06	6.14041e+06	11	11	11	10	10	9	11	10	10	10	10	11	11	11	11	10	10	9	11	10	10	10	10	11
Q99KG3	236732	Rbm10	FALSE	RNA-binding protein 10 OS=Mus musculus OX=10090 GN=Rbm10 PE=1 SV=1	18	12	137	12	53.678	391.42	12	103.4	5.32669e+06	1.12188e+07	8.10843e+06	8.10843e+06	6.39326e+06	1.12287e+07	5.58864e+06	7.20557e+06	7.14323e+06	8.93514e+06	8.30742e+06	7.40293e+06	8.51897e+06	10	11	10	11	12	11	10	11	11	11	11	11	10	11	10	11	12	11	10	11	11	11	11	11
Q8VC31	243846	Ccdc9	FALSE	Coiled-coil domain-containing protein 9 OS=Mus musculus OX=10090 GN=Ccdc9 PE=1 SV=1	25	16	137	16	67.044	325.05	16	61.4	6.99964e+06	1.25303e+07	1.82786e+07	1.82786e+07	9.53313e+06	1.14448e+07	5.92779e+06	1.07005e+07	1.51658e+07	8.98147e+06	1.00179e+07	1.33219e+07	1.22509e+07	12	13	14	14	13	13	14	15	13	14	14	14	12	13	14	14	13	13	14	15	13	14	14	14
P11499	15516	Hsp90ab1	FALSE	Heat shock protein HSP 90-beta OS=Mus musculus OX=10090 GN=Hsp90ab1 PE=1 SV=3	26	15	137	9	65.937	428.91	15	83.2	2.00428e+07	4.20693e+07	2.66921e+07	2.66921e+07	2.52966e+07	3.76904e+07	26085223	2.7239e+07	2.67733e+07	2.30283e+07	2.66977e+07	3.49564e+07	2.70901e+07	13	13	12	13	14	14	13	14	12	14	13	13	8	7	7	7	8	8	7	8	6	8	8	7
O70439	53331	Stx7	FALSE	Syntaxin-7 OS=Mus musculus OX=10090 GN=Stx7 PE=1 SV=3	63	10	137	10	53.31	414.36	10	29.8	1.72741e+07	2.62685e+07	2.47982e+07	2.47982e+07	1.72881e+07	2.95051e+07	1.6263e+07	2.38523e+07	2.77577e+07	2.59503e+07	2.45395e+07	3.35682e+07	2.77418e+07	9	9	9	9	9	10	10	9	9	10	10	10	9	9	9	9	9	10	10	9	9	10	10	10
Q9DBH5	66890	Lman2	FALSE	Vesicular integral-membrane protein VIP36 OS=Mus musculus OX=10090 GN=Lman2 PE=1 SV=2	46	14	137	14	52.392	368.09	14	40.4	2.23832e+07	2.59646e+07	8.83542e+06	8.83542e+06	2.12597e+07	3.81442e+07	2.46368e+07	7.76891e+06	1.06263e+07	4.18535e+07	3.82434e+07	4.98807e+06	1.91872e+07	14	14	11	14	14	14	9	12	14	14	10	14	14	14	11	14	14	14	9	12	14	14	10	14
Q921H8	113868	Acaa1a	TRUE	3-ketoacyl-CoA thiolase A, peroxisomal OS=Mus musculus OX=10090 GN=Acaa1a PE=1 SV=1	39	11	137	4	61.784	450.45	11	43.9	6.88964e+06	1.05166e+07	6.85177e+06	6.85177e+06	6.40465e+06	1.12222e+07	8.34425e+06	5.84018e+06	4.3522e+06	1.06299e+07	9.88635e+06	4.25587e+06	7.3114e+06	11	9	9	10	10	10	9	10	10	10	10	9	4	4	4	4	4	4	4	4	4	4	4	4
Q91X72	15458	Hpx	FALSE	Hemopexin OS=Mus musculus OX=10090 GN=Hpx PE=1 SV=2	40	16	137	16	68.698	351.92	16	51.3	3.6204e+07	3.43526e+07	2.03392e+07	2.03392e+07	2.49331e+07	5.343e+07	2.95344e+07	1.19086e+07	2.16542e+07	6.53754e+07	3.57888e+07	8.62072e+06	1.88759e+07	16	14	11	16	16	16	12	14	16	15	13	13	16	14	11	16	16	16	12	14	16	15	13	13
Q61990	18521	Pcbp2	FALSE	Poly(rC)-binding protein 2 OS=Mus musculus OX=10090 GN=Pcbp2 PE=1 SV=1	36	10	136	5	42.069	354.98	10	38.2	3.13485e+06	7.20854e+06	1.22303e+06	1.22303e+06	3.09074e+06	5.6275e+06	4.42831e+06	1.67735e+06	2.38972e+06	4.81543e+06	3.90381e+06	1.70133e+06	3.03297e+06	8	10	7	10	10	10	8	10	9	9	9	9	3	5	2	5	5	5	3	5	4	4	4	4
Q9WU78	18571	Pdcd6ip	FALSE	Programmed cell death 6-interacting protein OS=Mus musculus OX=10090 GN=Pdcd6ip PE=1 SV=3	24	15	136	15	61.191	358.28	15	96	5.34916e+06	9.24075e+06	9.83724e+06	9.83724e+06	5.28727e+06	6.60941e+06	3.81591e+06	6.57232e+06	7.67432e+06	6.71943e+06	5.8267e+06	9.81035e+06	6.86233e+06	13	13	13	12	12	11	13	13	13	12	13	12	13	13	13	12	12	11	13	13	13	12	13	12
P14602	15507	Hspb1	FALSE	Heat shock protein beta-1 OS=Mus musculus OX=10090 GN=Hspb1 PE=1 SV=3	62	11	136	11	44.663	444.3	11	23	1.07356e+07	1.57414e+07	2.47231e+07	2.47231e+07	4.50474e+07	7.34574e+07	4.95969e+07	1.6052e+07	1.45277e+07	3.91599e+07	2.48375e+07	4.22432e+07	2.6116e+07	9	9	9	10	11	10	9	9	9	9	9	9	9	9	9	10	11	10	9	9	9	9	9	9
Q8K4P0	74320	Wdr33	FALSE	pre-mRNA 3' end processing protein WDR33 OS=Mus musculus OX=10090 GN=Wdr33 PE=1 SV=1	17	17	136	17	73.856	319.77	17	145.2	3.10864e+06	6.85689e+06	5.01386e+06	5.01386e+06	3.15837e+06	5.76408e+06	2.39823e+06	6.14901e+06	5.96471e+06	2.04913e+06	4.26954e+06	6.83784e+06	5.04517e+06	14	14	14	13	15	13	14	15	9	14	15	15	14	14	14	13	15	13	14	15	9	14	15	15
Q7TNC4	192196	Luc7l2	FALSE	Putative RNA-binding protein Luc7-like 2 OS=Mus musculus OX=10090 GN=Luc7l2 PE=1 SV=1	36	14	136	10	52.283	326.68	14	46.6	1.37488e+07	1.8186e+07	3.3655e+07	3.3655e+07	6.46971e+06	9.94227e+06	4.62019e+06	1.94758e+07	2.19976e+07	2.07261e+07	8.65155e+06	1.59695e+07	5.51448e+06	11	12	13	9	10	10	12	13	12	11	11	9	8	8	9	6	6	6	8	9	8	7	7	5
Q6P8I4	76302	Pcnp	FALSE	PEST proteolytic signal-containing nuclear protein OS=Mus musculus OX=10090 GN=Pcnp PE=1 SV=1	65	10	136	10	47.216	370.15	10	19	1.50519e+07	2.51644e+07	4.15347e+07	4.15347e+07	2.70897e+07	3.07996e+07	1.75395e+07	2.18716e+07	3.04731e+07	3.09749e+07	2.55278e+07	2.5819e+07	3.11493e+07	10	9	10	10	10	10	10	10	10	10	9	10	10	9	10	10	10	10	10	10	10	10	9	10
Q9D8X2	234388	Ccdc124	FALSE	Coiled-coil domain-containing protein 124 OS=Mus musculus OX=10090 GN=Ccdc124 PE=1 SV=1	57	13	136	13	64.794	321.48	13	25.3	2.99612e+07	5.66218e+07	5.78839e+07	5.78839e+07	2.83543e+07	3.77877e+07	2.53478e+07	4.82585e+07	4.78681e+07	4.23673e+07	3.5211e+07	4.23287e+07	3.75028e+07	13	13	13	13	13	13	13	13	13	13	13	13	13	13	13	13	13	13	13	13	13	13	13	13
Q9R1Z7	19286	Pts	FALSE	6-pyruvoyl tetrahydrobiopterin synthase OS=Mus musculus OX=10090 GN=Pts PE=1 SV=2	57	7	136	7	40.442	383.4	7	16.2	1.61227e+07	2.79224e+07	2.06404e+07	2.06404e+07	1.63807e+07	2.19388e+07	1.86768e+07	1.80215e+07	2.33357e+07	3.17599e+07	2.36982e+07	1.91063e+07	2.46778e+07	7	7	7	7	7	7	7	7	7	7	7	7	7	7	7	7	7	7	7	7	7	7	7	7
P68037	22195	Ube2l3	FALSE	Ubiquitin-conjugating enzyme E2 L3 OS=Mus musculus OX=10090 GN=Ube2l3 PE=1 SV=1	69	8	136	8	47.603	440.33	8	17.9	8.59964e+07	1.40122e+08	9.82366e+07	9.82366e+07	8.7336e+07	1.27658e+08	9.25135e+07	8.86197e+07	1.06172e+08	1.56035e+08	1.22507e+08	7.22562e+07	1.17799e+08	8	8	8	8	8	8	8	8	8	8	8	8	8	8	8	8	8	8	8	8	8	8	8	8
Q9Z2Y8	114863	Plpbp	TRUE	Pyridoxal phosphate homeostasis protein OS=Mus musculus OX=10090 GN=Plpbp PE=1 SV=1	61	11	135	11	59.604	381.15	11	30	1.70433e+07	3.00195e+07	7.79141e+06	7.79141e+06	1.75723e+07	3.20342e+07	2.87961e+07	5.90461e+06	8.44433e+06	5.05907e+07	2.79891e+07	4.63614e+06	1.40583e+07	11	11	9	11	11	10	8	9	11	11	9	10	11	11	9	11	11	10	8	9	11	11	9	10
P10852	17254	Slc3a2	FALSE	4F2 cell-surface antigen heavy chain OS=Mus musculus OX=10090 GN=Slc3a2 PE=1 SV=1	36	16	135	16	62.42	345.16	16	58.3	1.49866e+07	2.12478e+07	2.2337e+07	2.2337e+07	1.70562e+07	2.44273e+07	1.53025e+07	1.12135e+07	1.6454e+07	1.42539e+07	1.76918e+07	1.29512e+07	2.14516e+07	14	13	14	14	14	13	12	14	12	14	14	15	14	13	14	14	14	13	12	14	12	14	14	15
Q9DBJ1	18648	Pgam1	FALSE	Phosphoglycerate mutase 1 OS=Mus musculus OX=10090 GN=Pgam1 PE=1 SV=3	67	12	135	12	68.892	389.21	12	28.8	8.53047e+06	1.71576e+07	8.79441e+06	8.79441e+06	1.03911e+07	2.01479e+07	1.61873e+07	7.33707e+06	8.35941e+06	2.17978e+07	1.67536e+07	8.40561e+06	1.24817e+07	11	10	10	10	12	11	10	10	10	11	10	11	11	10	10	10	12	11	10	10	10	11	10	11
P30115	14859	Gsta3	FALSE	Glutathione S-transferase A3 OS=Mus musculus OX=10090 GN=Gsta3 PE=1 SV=2	52	9	135	9	41.694	387.35	9	25.3	2.91763e+07	5.43202e+07	3.24611e+07	3.24611e+07	4.25332e+07	7.77379e+07	6.12677e+07	2.35507e+07	2.22047e+07	7.90524e+07	5.90778e+07	2.89715e+07	4.15475e+07	9	9	8	9	9	9	8	8	9	9	8	9	9	9	8	9	9	9	8	8	9	9	8	9
Q9CR21	70316	Ndufab1	TRUE	Acyl carrier protein, mitochondrial OS=Mus musculus OX=10090 GN=Ndufab1 PE=1 SV=1	45	6	135	6	33.415	397.32	6	17.4	3.50688e+07	7.04555e+07	6.53337e+07	6.53337e+07	3.15621e+07	4.80701e+07	3.46893e+07	4.178e+07	5.56042e+07	6.2648e+07	3.99108e+07	6.60074e+07	4.92538e+07	5	5	5	5	6	6	6	6	6	5	6	6	5	5	5	5	6	6	6	6	6	5	6	6
O89020	280662	Afm	FALSE	Afamin OS=Mus musculus OX=10090 GN=Afm PE=1 SV=2	25	15	134	15	54.153	303.83	15	69.3	1.60025e+07	1.58825e+07	1.78316e+07	1.78316e+07	1.6044e+07	2.1709e+07	1.57236e+07	9.19958e+06	1.25168e+07	2.40351e+07	2.01694e+07	1.14158e+07	2.06487e+07	15	14	15	14	15	15	13	15	15	14	14	15	15	14	15	14	15	15	13	15	15	14	14	15
P31725	20202	S100a9	FALSE	Protein S100-A9 OS=Mus musculus OX=10090 GN=S100a9 PE=1 SV=3	51	7	134	7	32.609	354.78	7	13	8.79896e+06	2.30283e+07	4.39639e+07	4.39639e+07	3.56107e+07	8.16742e+07	4.72118e+07	1.38816e+07	3.7873e+07	4.31328e+07	3.27338e+07	5.39358e+07	5.25246e+07	6	7	7	7	7	7	7	7	6	7	7	7	6	7	7	7	7	7	7	7	6	7	7	7
Q9EQS3	56309	Mycbp	FALSE	c-Myc-binding protein OS=Mus musculus OX=10090 GN=Mycbp PE=1 SV=5	75	10	134	10	44.783	344.86	10	12	3.4342e+07	7.16145e+07	84759363	84759363	4.55775e+07	5.44719e+07	3.61188e+07	5.75826e+07	6.34909e+07	5.79195e+07	5.18095e+07	8.60199e+07	6.0448e+07	10	10	10	10	10	10	10	10	10	10	10	10	10	10	10	10	10	10	10	10	10	10	10	10
Q01149	12843	Col1a2	FALSE	Collagen alpha-2(I) chain OS=Mus musculus OX=10090 GN=Col1a2 PE=1 SV=2	10	10	134	10	50.334	398.68	10	129.5	2.12562e+07	4.64551e+07	6.70747e+07	6.70747e+07	4.21646e+07	3.68451e+07	3.64742e+07	6.42788e+07	3.93026e+07	5.15977e+07	3.95383e+07	5.25133e+07	6.07232e+07	9	9	9	10	8	9	9	9	9	9	10	10	9	9	9	10	8	9	9	9	9	9	10	10
Q9JM96	56699	Cdc42ep4	FALSE	Cdc42 effector protein 4 OS=Mus musculus OX=10090 GN=Cdc42ep4 PE=1 SV=1	51	12	134	12	60.864	414.37	12	37.8	8.4077e+06	1.67456e+07	1.95884e+07	1.95884e+07	1.24098e+07	17350442	1.04368e+07	1.44733e+07	1.55909e+07	1.49927e+07	1.29942e+07	1.93677e+07	1.7052e+07	8	12	11	10	12	9	11	12	10	11	11	12	8	12	11	10	12	9	11	12	10	11	11	12
Q80TH2	59079	Erbin	FALSE	Erbin OS=Mus musculus OX=10090 GN=Erbin PE=1 SV=3	22	21	134	21	95.553	359.78	21	157.2	6.23729e+06	1.06122e+07	7.31197e+06	7.31197e+06	6.75787e+06	8.50222e+06	6.18087e+06	7.31553e+06	7.89373e+06	7.42087e+06	7.32094e+06	7.51983e+06	8.69858e+06	19	17	15	17	18	16	16	19	16	18	16	19	19	17	15	17	18	16	16	19	16	18	16	19
Q99LM2	80280	Cdk5rap3	FALSE	CDK5 regulatory subunit-associated protein 3 OS=Mus musculus OX=10090 GN=Cdk5rap3 PE=1 SV=1	47	19	133	19	88.579	391.85	19	57	1.85996e+07	1.98149e+07	9.21044e+06	9.21044e+06	1.25685e+07	1.59542e+07	1.29666e+07	6.47365e+06	7.40023e+06	2.60657e+07	1.87482e+07	4.1919e+06	1.05027e+07	17	16	11	16	15	15	10	13	17	19	12	16	17	16	11	16	15	15	10	13	17	19	12	16
O88811	56324	Stam2	FALSE	Signal transducing adapter molecule 2 OS=Mus musculus OX=10090 GN=Stam2 PE=1 SV=1	35	16	133	15	71.287	350.59	16	57.4	1.78485e+07	3.58728e+07	4.00833e+07	4.00833e+07	1.92942e+07	2.68636e+07	1.73305e+07	2.3655e+07	2.84605e+07	2.63284e+07	3.10817e+07	2.62769e+07	2.8782e+07	13	14	16	15	12	12	15	16	13	15	16	16	12	13	15	14	11	11	14	15	12	14	15	15
Q3THW5	77605	H2az2	FALSE	Histone H2A.V OS=Mus musculus OX=10090 GN=H2az2 PE=1 SV=3	54	5	132	3	24.165	354.64	5	13.5	8.0249e+06	1.66474e+07	5.87048e+06	5.87048e+06	1.09006e+07	2.16584e+07	1.66027e+07	1.1143e+07	8.17129e+06	2.57555e+07	1.62576e+07	6.60302e+06	1.87034e+07	5	5	5	5	5	5	5	5	5	5	5	5	3	3	3	3	3	3	3	3	3	3	3	3
O08585	12757	Clta	FALSE	Clathrin light chain A OS=Mus musculus OX=10090 GN=Clta PE=1 SV=2	29	9	132	9	23.883	303.39	9	25.6	1.29799e+08	1.99301e+08	1.94267e+08	1.94267e+08	1.57173e+08	1.95083e+08	1.1155e+08	1.95429e+08	2.17674e+08	1.6074e+08	1.52993e+08	2.41356e+08	1.96245e+08	9	9	9	9	9	9	9	9	9	9	9	9	9	9	9	9	9	9	9	9	9	9	9	9
P97822	66471	Anp32e	FALSE	Acidic leucine-rich nuclear phosphoprotein 32 family member E OS=Mus musculus OX=10090 GN=Anp32e PE=1 SV=2	50	11	132	11	56.094	458.95	11	29.6	1.45862e+07	2.6735e+07	3.0738e+07	3.0738e+07	1.83592e+07	2.29329e+07	1.2452e+07	2.16472e+07	3.04206e+07	2.24157e+07	2.23452e+07	3.20586e+07	2.55727e+07	9	10	9	10	10	9	10	10	10	9	10	10	9	10	9	10	10	9	10	10	10	9	10	10
P11610	12480	Cd1d2	FALSE	Antigen-presenting glycoprotein CD1d2 OS=Mus musculus OX=10090 GN=Cd1d2 PE=1 SV=2	19	6	132	1	32.802	209.8	6	38.5					311425									5	5	5	6	5	5	5	5	5	5	5	5	0	0	0	1	0	0	0	0	0	0	0	0
Q62417	20411	Sorbs1	FALSE	Sorbin and SH3 domain-containing protein 1 OS=Mus musculus OX=10090 GN=Sorbs1 PE=1 SV=2	13	14	132	14	55.944	361.14	14	143	6.19924e+06	1.48741e+07	1.39793e+07	1.39793e+07	8.77278e+06	1.33429e+07	6.91425e+06	1.24985e+07	1.20159e+07	9.51989e+06	1.03822e+07	1.32922e+07	1.20066e+07	12	13	14	12	13	10	13	13	13	12	14	12	12	13	14	12	13	10	13	13	13	12	14	12
P83917	12412	Cbx1	FALSE	Chromobox protein homolog 1 OS=Mus musculus OX=10090 GN=Cbx1 PE=1 SV=1	60	9	131	8	58.877	437.1	9	21.4	1.39906e+07	2.40545e+07	1.66474e+07	1.66474e+07	1.77015e+07	3.07492e+07	1.97582e+07	1.66982e+07	1.76236e+07	2.91976e+07	2.69423e+07	2.13838e+07	2.52359e+07	7	7	8	7	7	7	8	8	8	8	8	9	6	6	7	6	6	6	7	7	7	7	7	8
Q9JIH2	18141	Nup50	FALSE	Nuclear pore complex protein Nup50 OS=Mus musculus OX=10090 GN=Nup50 PE=1 SV=3	40	14	131	14	56.722	343.65	14	49.5	8.0246e+06	1.58038e+07	1.02997e+07	1.02997e+07	9.12388e+06	1.36543e+07	7.13306e+06	1.03064e+07	1.11268e+07	1.19696e+07	1.01386e+07	1.15307e+07	1.06512e+07	12	13	13	13	13	11	13	12	12	12	12	13	12	13	13	13	13	11	13	12	12	12	12	13
P53996	12785	Cnbp	FALSE	CCHC-type zinc finger nucleic acid binding protein OS=Mus musculus OX=10090 GN=Cnbp PE=1 SV=2	59	9	131	9	46.219	289.67	9	19.6	1.2454e+07	2.95348e+07	2.4755e+07	2.4755e+07	1.77264e+07	1.98499e+07	1.24668e+07	2.47465e+07	5.58743e+07	4.4209e+07	3.2301e+07	5.82762e+07	3.07275e+07	7	8	8	8	8	8	8	9	8	8	9	8	7	8	8	8	8	8	8	9	8	8	9	8
P24668	17113	M6pr	FALSE	Cation-dependent mannose-6-phosphate receptor OS=Mus musculus OX=10090 GN=M6pr PE=1 SV=1	35	8	131	8	43.804	343.81	8	31.2	3.7194e+07	4.89723e+07	5.14197e+07	5.14197e+07	3.62695e+07	4.21785e+07	2.77602e+07	3.59623e+07	4.53343e+07	5.58125e+07	4.64229e+07	4.61705e+07	5.13684e+07	8	8	8	8	8	8	8	8	7	8	8	8	8	8	8	8	8	8	8	8	7	8	8	8
Q80W21	68312	Gstm7	FALSE	Glutathione S-transferase Mu 7 OS=Mus musculus OX=10090 GN=Gstm7 PE=1 SV=1	69	16	131	7	63.449	390.62	16	25.7	1.78773e+06	1.41883e+06	347412	347412	1.42262e+06	1.73976e+06	3.63341e+06	298458	316506	3.63524e+06	2.97968e+06	349261	1.49682e+06	13	9	7	13	11	15	8	9	14	15	9	12	5	2	1	5	3	6	2	1	6	6	2	4
Q9Z1D1	53356	Eif3g	FALSE	Eukaryotic translation initiation factor 3 subunit G OS=Mus musculus OX=10090 GN=Eif3g PE=1 SV=2	61	15	130	15	68.028	388.31	15	35.6	1.44865e+07	2.29707e+07	1.36435e+07	1.36435e+07	1.29765e+07	1.56353e+07	1.20878e+07	1.44619e+07	1.57486e+07	1.56529e+07	1.54004e+07	1.22182e+07	1.43458e+07	14	13	11	13	14	13	10	13	13	12	11	13	14	13	11	13	14	13	10	13	13	12	11	13
Q9CWZ3	60365	Rbm8a	FALSE	RNA-binding protein 8A OS=Mus musculus OX=10090 GN=Rbm8a PE=1 SV=4	56	7	130	7	45.937	382.46	7	19.9	1.72458e+07	3.0786e+07	2.60603e+07	2.60603e+07	2.05502e+07	3.61239e+07	2.15509e+07	2.0742e+07	2.22047e+07	3.11923e+07	2.8578e+07	2.16026e+07	2.82086e+07	7	6	6	6	7	6	7	7	7	7	6	7	7	6	6	6	7	6	7	7	7	7	6	7
P61089	93765	Ube2n	FALSE	Ubiquitin-conjugating enzyme E2 N OS=Mus musculus OX=10090 GN=Ube2n PE=1 SV=1	78	10	130	10	46.226	334.87	10	17.1	1.12036e+08	2.0891e+08	6.76868e+07	6.76868e+07	1.16584e+08	1.82609e+08	1.32683e+08	7.92418e+07	8.6676e+07	2.31289e+08	1.65728e+08	5.50574e+07	129917232	10	10	9	10	10	10	9	9	10	10	9	10	10	10	9	10	10	10	9	9	10	10	9	10
O70492	54198	Snx3	FALSE	Sorting nexin-3 OS=Mus musculus OX=10090 GN=Snx3 PE=1 SV=3	62	9	130	7	34.99	302.63	9	18.7	2.62514e+07	3.5676e+07	1.90637e+07	1.90637e+07	2.61832e+07	4.55628e+07	3.35395e+07	1.97636e+07	2.33469e+07	4.60851e+07	4.3625e+07	1.5808e+07	3.04553e+07	9	8	9	9	8	9	9	9	8	8	9	8	7	6	7	7	6	7	7	7	6	6	7	6
P52196	22117	Tst	TRUE	Thiosulfate sulfurtransferase OS=Mus musculus OX=10090 GN=Tst PE=1 SV=3	39	11	129	11	44.971	334.41	11	33.4	1.78911e+07	2.30231e+07	1.10281e+07	1.10281e+07	2.03597e+07	4.74091e+07	3.42404e+07	1.22724e+07	1.08268e+07	6.65651e+07	3.77684e+07	1.20219e+07	1.95184e+07	11	10	10	11	11	11	11	11	11	10	10	10	11	10	10	11	11	11	11	11	11	10	10	10
Q9CXZ1	17993	Ndufs4	TRUE	NADH dehydrogenase [ubiquinone] iron-sulfur protein 4, mitochondrial OS=Mus musculus OX=10090 GN=Ndufs4 PE=1 SV=3	53	9	129	9	44.639	340.35	9	19.8	1.15354e+08	1.87338e+08	1.94822e+08	1.94822e+08	1.00281e+08	1.48128e+08	1.05008e+08	7.3841e+07	6.50071e+07	3.41038e+07	9.42073e+07	2.33554e+07	1.05443e+08	8	9	9	9	9	8	6	8	7	8	6	8	8	9	9	9	9	8	6	8	7	8	6	8
P43276	56702	H1f5	FALSE	Histone H1.5 OS=Mus musculus OX=10090 GN=H1-5 PE=1 SV=2	36	9	129	5	40.044	296.87	9	22.6	2.58829e+07	4.81776e+07	3.65014e+07	3.65014e+07	4.1286e+07	5.7865e+07	4.27275e+07	3.4951e+07	3.49069e+07	5.39913e+07	4.29088e+07	4.42283e+07	4.60542e+07	8	8	8	8	8	8	7	7	8	8	8	8	5	5	5	5	5	5	5	5	5	5	5	5
E9Q555	672511	Rnf213	FALSE	E3 ubiquitin-protein ligase RNF213 OS=Mus musculus OX=10090 GN=Rnf213 PE=1 SV=3	3	14	129	14	49.02	331.13	14	583.9	4.90303e+06	1.11578e+07	8.25794e+06	8.25794e+06	4.69132e+06	3.96067e+06	2.88634e+06	8.9053e+06	1.29623e+07	4.31021e+06	3.54505e+06	8.42255e+06	8.01988e+06	12	12	12	11	10	9	12	13	9	10	13	12	12	12	12	11	10	9	12	13	9	10	13	12
Q64735	12946	Cr1l	FALSE	Complement component receptor 1-like protein OS=Mus musculus OX=10090 GN=Cr1l PE=1 SV=1	21	8	129	8	51.967	379.65	8	53.7	1.92434e+07	2.6574e+07	3.14921e+07	3.14921e+07	1.90805e+07	2.49277e+07	1.6779e+07	2.30206e+07	2.98071e+07	3.68789e+07	2.47415e+07	2.574e+07	2.47182e+07	8	8	8	8	8	8	8	8	8	8	8	8	8	8	8	8	8	8	8	8	8	8	8	8
Q3UZA1	226594	Rcsd1	FALSE	CapZ-interacting protein OS=Mus musculus OX=10090 GN=Rcsd1 PE=1 SV=1	45	12	128	12	69.317	342.24	12	44.1	3.31163e+06	5.71358e+06	9.23083e+06	9.23083e+06	6.33059e+06	6.87132e+06	4.53868e+06	5.1583e+06	8.98266e+06	4.17302e+06	5.52615e+06	9.27742e+06	8.43416e+06	11	11	11	12	12	11	11	12	11	12	12	12	11	11	11	12	12	11	11	12	11	12	12	12
Q9D2G2	78920	Dlst	TRUE	Dihydrolipoyllysine-residue succinyltransferase component of 2-oxoglutarate dehydrogenase complex, mitochondrial OS=Mus musculus OX=10090 GN=Dlst PE=1 SV=1	27	10	128	10	56.189	311.86	10	49	2.28351e+07	3.21529e+07	2.37773e+07	2.37773e+07	2.54775e+07	4.76539e+07	2.46611e+07	1.97252e+07	2.32713e+07	6.62955e+07	3.32855e+07	2.42868e+07	2.29597e+07	10	9	8	9	9	10	9	9	9	9	8	9	10	9	8	9	9	10	9	9	9	9	8	9
P70333	56258	Hnrnph2	FALSE	Heterogeneous nuclear ribonucleoprotein H2 OS=Mus musculus OX=10090 GN=Hnrnph2 PE=1 SV=1	44	13	128	6	73.644	318.76	13	49.2	1.73384e+07	3.43659e+07	1.58442e+07	1.58442e+07	1.8906e+07	39837098	2.50784e+07	1.3645e+07	1.24348e+07	3.54288e+07	2.86499e+07	9.10571e+06	1.66204e+07	11	12	10	11	12	12	10	11	12	13	11	11	4	5	4	4	5	5	3	4	5	6	4	4
P24721	11890	Asgr2	FALSE	Asialoglycoprotein receptor 2 OS=Mus musculus OX=10090 GN=Asgr2 PE=1 SV=1	36	8	128	8	27.337	315.22	8	34.9	4.06997e+07	5.69469e+07	4.05533e+07	4.05533e+07	3.52789e+07	5.17586e+07	3.48985e+07	3.19344e+07	2.96507e+07	6.19786e+07	6.03719e+07	2.17753e+07	4.41505e+07	8	8	8	8	8	8	8	8	8	8	8	8	8	8	8	8	8	8	8	8	8	8	8	8
Q9CYI4	66978	Luc7l	FALSE	Putative RNA-binding protein Luc7-like 1 OS=Mus musculus OX=10090 GN=Luc7l PE=1 SV=2	29	11	127	7	42.959	324.1	11	43.9	4.87756e+06	5.57389e+06	1.1032e+07	1.1032e+07	2.98947e+06	4.06797e+06	2.1635e+06	6.80902e+06	5951779	6525822	3.45581e+06	7.7419e+06	2.36954e+06	9	9	11	10	10	10	11	10	11	11	11	9	6	5	7	7	6	6	7	6	7	7	7	5
Q9CYA6	70650	Zcchc8	FALSE	Zinc finger CCHC domain-containing protein 8 OS=Mus musculus OX=10090 GN=Zcchc8 PE=1 SV=3	30	13	127	13	67.164	347.16	13	78	1.05961e+07	1.41157e+07	1.39742e+07	1.39742e+07	1.06103e+07	1.55492e+07	1.03213e+07	1.07658e+07	1.25213e+07	1.66403e+07	1.39644e+07	1.37278e+07	1.32359e+07	10	11	12	10	11	11	11	11	10	10	11	10	10	11	12	10	11	11	11	11	10	10	11	10
Q9D8S9	69168	Bola1	TRUE	BolA-like protein 1 OS=Mus musculus OX=10090 GN=Bola1 PE=1 SV=1	69	7	127	7	49.212	414.32	7	14.4	3.25326e+07	5.97331e+07	4.0567e+07	4.0567e+07	3.45795e+07	4.55304e+07	3.13765e+07	4.40998e+07	5.04508e+07	6.6168e+07	5.00775e+07	5.25195e+07	5.03254e+07	7	7	7	7	7	7	7	7	7	7	7	7	7	7	7	7	7	7	7	7	7	7	7	7
Q8VCH0	235674	Acaa1b	TRUE	3-ketoacyl-CoA thiolase B, peroxisomal OS=Mus musculus OX=10090 GN=Acaa1b PE=1 SV=1	37	11	126	4	65.159	428.76	11	44	1.41286e+07	2.12797e+07	1.09858e+07	1.09858e+07	1.45039e+07	1.83856e+07	1.42116e+07	1.07342e+07	8.31021e+06	2.65646e+07	1.82083e+07	8.31196e+06	1.28328e+07	10	8	8	8	9	8	7	8	10	10	8	8	3	3	3	2	3	2	2	2	4	4	2	3
P47941	12929	Crkl	FALSE	Crk-like protein OS=Mus musculus OX=10090 GN=Crkl PE=1 SV=2	41	10	126	10	51.671	344.41	10	33.8	1.20873e+07	2.67467e+07	1.05492e+07	1.05492e+07	1.32684e+07	2.25932e+07	1.81991e+07	9.7314e+06	1.15772e+07	2.50596e+07	2.17794e+07	1.13146e+07	1.6256e+07	10	10	9	10	10	10	10	10	10	10	10	10	10	10	9	10	10	10	10	10	10	10	10	10
Q64374	19733	Rgn	FALSE	Regucalcin OS=Mus musculus OX=10090 GN=Rgn PE=1 SV=1	41	10	126	10	52.153	348.67	10	33.4	1.72208e+07	2.86885e+07	1.8265e+07	1.8265e+07	2.88436e+07	5.05663e+07	3.13717e+07	1.58056e+07	1.55766e+07	3.03368e+07	3.81816e+07	2.59656e+07	2.20075e+07	10	9	9	10	10	9	10	9	10	10	9	9	10	9	9	10	10	9	10	9	10	10	9	9
P70460	22323	Vasp	FALSE	Vasodilator-stimulated phosphoprotein OS=Mus musculus OX=10090 GN=Vasp PE=1 SV=4	32	12	126	12	57.606	381.38	12	39.6	4.70784e+06	1.14218e+07	7.08938e+06	7.08938e+06	7.08558e+06	1.032e+07	6.18901e+06	7.41729e+06	1.32187e+07	6.8081e+06	7.62711e+06	1.21625e+07	1.23559e+07	10	10	10	10	9	10	10	10	9	10	10	11	10	10	10	10	9	10	10	10	9	10	10	11
Q9JKB1	50933	Uchl3	FALSE	Ubiquitin carboxyl-terminal hydrolase isozyme L3 OS=Mus musculus OX=10090 GN=Uchl3 PE=1 SV=2	56	10	126	10	63.827	330.22	10	26.1	1.76734e+07	3.11421e+07	9.52199e+06	9.52199e+06	2.01754e+07	3.22438e+07	2.24327e+07	8.18531e+06	1.11809e+07	4.42399e+07	3.09319e+07	6.31848e+06	1.97784e+07	10	10	9	10	10	10	9	10	10	9	8	10	10	10	9	10	10	10	9	10	10	9	8	10
P28653	12111	Bgn	FALSE	Biglycan OS=Mus musculus OX=10090 GN=Bgn PE=1 SV=1	41	12	125	11	59.209	378.24	12	41.6	9.4945e+06	2.5245e+07	1.86364e+07	1.86364e+07	1.38226e+07	2.15436e+07	2.45108e+07	2.08084e+07	1.31937e+07	4.59676e+07	3.16666e+07	1.52206e+07	2.46544e+07	9	10	10	10	10	10	10	8	11	10	7	12	8	9	9	9	9	9	9	7	10	9	6	11
Q61247	18816	Serpinf2	FALSE	Alpha-2-antiplasmin OS=Mus musculus OX=10090 GN=Serpinf2 PE=1 SV=1	31	12	124	12	60.797	349.45	12	54.9	2.21508e+07	2.52675e+07	1.70244e+07	1.70244e+07	1.53383e+07	2.32202e+07	1.62772e+07	1.22538e+07	1.69109e+07	2.16218e+07	2.34201e+07	13704486	1.78932e+07	11	12	10	9	12	12	11	11	10	11	11	9	11	12	10	9	12	12	11	11	10	11	11	9
Q6Y685	320165	Tacc1	FALSE	Transforming acidic coiled-coil-containing protein 1 OS=Mus musculus OX=10090 GN=Tacc1 PE=1 SV=1	18	15	124	12	46.937	258.52	15	83.9	5.93578e+06	9.96183e+06	1.21734e+07	1.21734e+07	7.02352e+06	8.79781e+06	5.44653e+06	8.08583e+06	1.07573e+07	8.30627e+06	7.38616e+06	9.94789e+06	8.37781e+06	12	13	12	13	15	11	14	14	13	12	14	14	9	10	9	10	12	8	11	11	10	9	11	11
Q9WVT6	23831	Car14	FALSE	Carbonic anhydrase 14 OS=Mus musculus OX=10090 GN=Ca14 PE=1 SV=1	25	9	124	9	39.384	284.6	9	37.5	3.53029e+07	3.80873e+07	4.0773e+07	4.0773e+07	2.04931e+07	2.81347e+07	2.03616e+07	3.21924e+07	2.97459e+07	5.85229e+07	3.10637e+07	1.66045e+07	3.02047e+07	9	9	9	9	9	9	9	9	9	9	9	9	9	9	9	9	9	9	9	9	9	9	9	9
Q9CPW4	67771	Arpc5	FALSE	Actin-related protein 2/3 complex subunit 5 OS=Mus musculus OX=10090 GN=Arpc5 PE=1 SV=3	58	8	124	8	41.693	423.98	8	16.3	3.64836e+07	7.7494e+07	4.10972e+07	4.10972e+07	4.4538e+07	6.9855e+07	4.88604e+07	4.01128e+07	5.02618e+07	8.2129e+07	6.7966e+07	4.26654e+07	6.47308e+07	7	8	7	8	7	8	7	8	8	8	8	8	7	8	7	8	7	8	7	8	8	8	8	8
Q62433	17988	Ndrg1	FALSE	Protein NDRG1 OS=Mus musculus OX=10090 GN=Ndrg1 PE=1 SV=1	39	10	124	10	69.179	375.09	10	43	8.41761e+06	1.15186e+07	9.0419e+06	9.0419e+06	1.31444e+07	2.60032e+07	1.4354e+07	5.4476e+06	7.36255e+06	1.73159e+07	2.23323e+07	7.45962e+06	1.53697e+07	8	10	7	10	10	10	6	9	9	9	9	10	8	10	7	10	10	10	6	9	9	9	9	10
Q9D0B5	77032	Tstd3	TRUE	Thiosulfate sulfurtransferase/rhodanese-like domain-containing protein 3 OS=Mus musculus OX=10090 GN=Tstd3 PE=1 SV=1	55	7	124	7	47.572	371.89	7	17.3	1.72066e+07	2.75668e+07	1.54313e+07	1.54313e+07	1.56268e+07	2.34763e+07	1.56834e+07	2.56653e+07	2.75624e+07	4.43064e+07	2.4934e+07	2.23883e+07	2.02194e+07	6	7	6	6	6	6	6	7	6	6	7	7	6	7	6	6	6	6	6	7	6	6	7	7
Q9Z2D6	17257	Mecp2	FALSE	Methyl-CpG-binding protein 2 OS=Mus musculus OX=10090 GN=Mecp2 PE=1 SV=1	42	13	124	13	62.705	362.06	13	52.3	2.20689e+06	4.88839e+06	5.77045e+06	5.77045e+06	4.13382e+06	7.66265e+06	3.6441e+06	4.64685e+06	4.61066e+06	4.42503e+06	5.73399e+06	6.0193e+06	5.71151e+06	8	10	9	10	11	10	11	10	9	12	12	10	8	10	9	10	11	10	11	10	9	12	12	10
Q6NZB0	68598	Dnajc8	FALSE	DnaJ homolog subfamily C member 8 OS=Mus musculus OX=10090 GN=Dnajc8 PE=1 SV=2	54	11	123	11	53.873	356.78	11	29.8	1.52698e+07	2.92945e+07	3.42888e+07	3.42888e+07	2.52196e+07	3.62616e+07	1.92994e+07	2.51029e+07	3.04071e+07	2.45572e+07	2.83071e+07	3.73112e+07	3.37406e+07	10	11	11	11	11	11	11	11	11	10	11	11	10	11	11	11	11	11	11	11	11	10	11	11
Q61838	11287	Pzp	FALSE	Pregnancy zone protein OS=Mus musculus OX=10090 GN=Pzp PE=1 SV=3	14	15	123	15	54.711	328.8	15	165.7	8.29296e+06	9.06742e+06	8.90332e+06	8.90332e+06	9.07323e+06	2.02697e+07	1.16978e+07	3.61821e+06	5.87996e+06	1.84358e+07	1.145e+07	7.6931e+06	8.41252e+06	11	11	11	11	14	12	9	10	13	11	9	11	11	11	11	11	14	12	9	10	13	11	9	11
Q80TY0	14269	Fnbp1	FALSE	Formin-binding protein 1 OS=Mus musculus OX=10090 GN=Fnbp1 PE=1 SV=2	34	17	123	17	75.754	340.66	17	71.3	9.41226e+06	1.53317e+07	1.27116e+07	1.27116e+07	9.7592e+06	1.42577e+07	9.24891e+06	1.14933e+07	1.47243e+07	1.44237e+07	1.51325e+07	1.29704e+07	1.88112e+07	15	16	16	15	15	14	16	16	15	15	14	16	15	16	16	15	15	14	16	16	15	15	14	16
O35737	59013	Hnrnph1	FALSE	Heterogeneous nuclear ribonucleoprotein H OS=Mus musculus OX=10090 GN=Hnrnph1 PE=1 SV=3	38	12	123	4	62.331	324.61	12	49.2	3.45535e+06	4406567	1.15676e+06	1.15676e+06	2.66638e+06	3.63862e+06	3.04588e+06	3.85485e+06	2.32176e+06	3.68476e+06	4.82149e+06	2.31016e+06	2.99582e+06	12	12	9	12	12	12	11	12	11	12	11	12	4	4	2	4	4	4	3	4	3	4	3	4
Q9Z1Z0	56041	Uso1	FALSE	General vesicular transport factor p115 OS=Mus musculus OX=10090 GN=Uso1 PE=1 SV=2	19	16	123	16	65.402	357.04	16	106.9	6.31807e+06	1.75402e+07	1.19417e+07	1.19417e+07	7.68232e+06	1.02978e+07	6.78435e+06	1.22863e+07	1.29034e+07	6.38922e+06	8.33787e+06	1.65932e+07	1.20631e+07	12	13	13	12	13	12	12	14	13	14	16	14	12	13	13	12	13	12	12	14	13	14	16	14
P54869	15360	Hmgcs2	TRUE	Hydroxymethylglutaryl-CoA synthase, mitochondrial OS=Mus musculus OX=10090 GN=Hmgcs2 PE=1 SV=2	28	11	123	11	53.758	332.97	11	56.8	1.41683e+07	2.85212e+07	1.25082e+07	1.25082e+07	1.58561e+07	3.0007e+07	1.60871e+07	1.2627e+07	1.13111e+07	2.97778e+07	2.10865e+07	1.61889e+07	1.69101e+07	10	10	9	10	10	10	10	11	10	10	11	9	10	10	9	10	10	10	10	11	10	10	11	9
Q8JZS0	108030	Lin7a	FALSE	Protein lin-7 homolog A OS=Mus musculus OX=10090 GN=Lin7a PE=1 SV=2	40	9	123	4	40.95	323.88	9	26	9.8144e+06	1.9749e+07	1.63309e+07	1.63309e+07	1.38886e+07	2.02465e+07	1.57938e+07	1.01629e+07	1.07186e+07	1.79261e+07	1.92713e+07	1.17577e+07	1.7936e+07	9	9	9	8	8	8	9	9	9	9	9	9	4	4	4	4	4	4	4	4	4	4	4	4
P60904	13002	Dnajc5	FALSE	DnaJ homolog subfamily C member 5 OS=Mus musculus OX=10090 GN=Dnajc5 PE=1 SV=1	59	9	123	9	52.367	353.88	9	22.1	1.10142e+07	1.81875e+07	2.56305e+07	2.56305e+07	1.2622e+07	1.73054e+07	8.44071e+06	1.58092e+07	1.78501e+07	1.58835e+07	1.54324e+07	1.77107e+07	1.76862e+07	9	9	9	9	9	9	9	9	9	9	9	9	9	9	9	9	9	9	9	9	9	9	9	9
P41317	17195	Mbl2	FALSE	Mannose-binding protein C OS=Mus musculus OX=10090 GN=Mbl2 PE=1 SV=2	38	10	122	9	35.067	323.1	10	25.9	3.50945e+07	5.11758e+07	3.90288e+07	3.90288e+07	3.3222e+07	3.98811e+07	2.60118e+07	3.46742e+07	3.65535e+07	5.67223e+07	3.72938e+07	4.27661e+07	4.91842e+07	9	10	10	10	10	10	9	10	10	10	10	10	8	9	9	9	9	9	8	9	9	9	9	9
Q5SX79	71774	Shroom1	FALSE	Protein Shroom1 OS=Mus musculus OX=10090 GN=Shroom1 PE=1 SV=2	31	17	122	17	67.633	354.4	17	89.9	5.61161e+06	5.96184e+06	7.66552e+06	7.66552e+06	6.17942e+06	4.90609e+06	5.51048e+06	6.52037e+06	7.18057e+06	5.53841e+06	6.1638e+06	1.08306e+07	8197337	16	14	16	17	13	16	16	16	14	15	17	14	16	14	16	17	13	16	16	16	14	15	17	14
E9Q6J5	665775	Bod1l	FALSE	Biorientation of chromosomes in cell division protein 1-like 1 OS=Mus musculus OX=10090 GN=Bod1l PE=1 SV=1	13	26	122	26	103.269	353.04	26	327.3	2.92294e+06	4.59917e+06	5.49814e+06	5.49814e+06	3.50855e+06	3.454e+06	2.19047e+06	4.84929e+06	4.99669e+06	2.3296e+06	2.50022e+06	6.18434e+06	4.3122e+06	17	17	17	16	15	16	22	19	14	16	21	18	17	17	17	16	15	16	22	19	14	16	21	18
Q8JZL3	105663	Thtpa	FALSE	Thiamine-triphosphatase OS=Mus musculus OX=10090 GN=Thtpa PE=1 SV=3	63	10	122	10	52.586	324.63	10	24.2	1.87139e+07	2.99841e+07	1.16396e+07	1.16396e+07	1.4472e+07	1.93765e+07	1.4459e+07	8.81227e+06	1.28251e+07	2.50947e+07	1.59227e+07	5.24928e+06	1.68026e+07	10	8	8	10	8	10	8	10	10	9	8	10	10	8	8	10	8	10	8	10	10	9	8	10
O08692	18054	Ngp	FALSE	Neutrophilic granule protein OS=Mus musculus OX=10090 GN=Ngp PE=1 SV=1	58	10	122	10	52.329	288.11	10	19.3	7.34138e+06	1.34863e+07	2.43282e+07	2.43282e+07	1.78963e+07	3.93917e+07	1.84006e+07	8.15886e+06	1.67679e+07	25259707	1.45156e+07	2.99547e+07	3.04288e+07	8	9	9	9	9	10	9	10	10	10	10	10	8	9	9	9	9	10	9	10	10	10	10	10
P70168	16211	Kpnb1	FALSE	Importin subunit beta-1 OS=Mus musculus OX=10090 GN=Kpnb1 PE=1 SV=2	40	24	122	24	130.873	389.08	24	97.1	5.18967e+06	1.04663e+07	2.77127e+06	2.77127e+06	9.66995e+06	3.01834e+07	3.21464e+07	1.65143e+06	1.78551e+06	6.78673e+07	1.82207e+07	1.60813e+06	3.39151e+06	17	20	7	20	24	24	6	7	24	22	3	8	17	20	7	20	24	24	6	7	24	22	3	8
Q9D8C4	70110	Ifi35	FALSE	Interferon-induced 35 kDa protein homolog OS=Mus musculus OX=10090 GN=Ifi35 PE=1 SV=3	51	10	122	10	43.696	386.89	10	31.9	6.21187e+07	7.9595e+07	5.58178e+07	5.58178e+07	2.03919e+07	1.03745e+08	9.30977e+07	5.98459e+07	5.58495e+07	3.2707e+07	9.88942e+07	7.09839e+07	8.73643e+07	10	10	9	9	10	10	9	10	10	10	9	9	10	10	9	9	10	10	9	10	10	10	9	9
Q91X97	52589	Ncald	FALSE	Neurocalcin-delta OS=Mus musculus OX=10090 GN=Ncald PE=1 SV=4	45	8	121	4	37.273	292.54	8	22.2	3.3059e+06	5.24615e+06	4.76191e+06	4.76191e+06	6.37705e+06	6.41018e+06	6.11859e+06	2.33988e+06	3.01756e+06	3.88452e+06	6.33909e+06	4.68096e+06	7.2978e+06	7	8	8	8	8	8	6	7	8	7	8	8	4	4	4	4	4	4	3	3	4	4	4	4
Q9D6U8	70186	Fam162a	TRUE	Protein FAM162A OS=Mus musculus OX=10090 GN=Fam162a PE=1 SV=1	38	8	121	8	46.852	330.8	8	17.7	5.14287e+07	8.97101e+07	4.83448e+07	4.83448e+07	5.40632e+07	8.23647e+07	5.84035e+07	4.74362e+07	5.38084e+07	1.38945e+08	7.36377e+07	3.68232e+07	6.78755e+07	7	7	7	8	8	8	7	8	7	7	7	8	7	7	7	8	8	8	7	8	7	7	7	8
Q91XT4	89867	Sec16b	FALSE	Protein transport protein Sec16B OS=Mus musculus OX=10090 GN=Sec16b PE=1 SV=3	20	14	121	14	76.989	278.69	14	115.4	4.4784e+06	1.07223e+07	8.51669e+06	8.51669e+06	4.68099e+06	8.81206e+06	3.49803e+06	7.19277e+06	7.31818e+06	3.89114e+06	7.32559e+06	8.69354e+06	6.62391e+06	13	13	13	13	13	14	13	13	12	13	14	13	13	13	13	13	13	14	13	13	12	13	14	13
Q9CYA0	76737	Creld2	FALSE	Protein disulfide isomerase Creld2 OS=Mus musculus OX=10090 GN=Creld2 PE=1 SV=1	33	11	121	11	53.269	270.31	11	38.2	2.22096e+07	2.85854e+07	4.40731e+07	4.40731e+07	1.86692e+07	1.74513e+07	9.78888e+06	2.84588e+07	3.46145e+07	2.27058e+07	1.78083e+07	2.61395e+07	2.84823e+07	8	9	8	7	7	8	8	11	11	9	10	9	8	9	8	7	7	8	8	11	11	9	10	9
Q9QXD6	14121	Fbp1	FALSE	Fructose-1,6-bisphosphatase 1 OS=Mus musculus OX=10090 GN=Fbp1 PE=1 SV=3	39	9	120	9	64.08	341.97	9	36.9	1.24885e+07	2.84229e+07	2.44611e+07	2.44611e+07	1.58842e+07	2.74556e+07	1.72777e+07	1.36867e+07	1.59637e+07	1.94785e+07	2.13666e+07	2.83519e+07	2.36573e+07	5	7	7	6	8	7	6	7	7	7	8	7	5	7	7	6	8	7	6	7	7	7	8	7
P62774	14489	Mtpn	FALSE	Myotrophin OS=Mus musculus OX=10090 GN=Mtpn PE=1 SV=2	76	9	120	9	52.612	378.93	9	12.9	2.96462e+07	6.55612e+07	2.97151e+07	2.97151e+07	3.86968e+07	5.3805e+07	4.40952e+07	2.42847e+07	3.36262e+07	7.07472e+07	5.04309e+07	2.5905e+07	4.59247e+07	8	8	7	8	8	9	7	9	8	9	7	9	8	8	7	8	8	9	7	9	8	9	7	9
Q9Z204	15381	Hnrnpc	FALSE	Heterogeneous nuclear ribonucleoproteins C1/C2 OS=Mus musculus OX=10090 GN=Hnrnpc PE=1 SV=1	40	13	120	13	59.199	307.45	13	34.4	1.84059e+07	6.43032e+07	3.05643e+07	3.05643e+07	2.53778e+07	3.91918e+07	2.31595e+07	4.49775e+07	4.04086e+07	2.23018e+07	2.79497e+07	48834518	3.42284e+07	9	10	10	10	12	10	10	11	10	11	10	10	9	10	10	10	12	10	10	11	10	11	10	10
Q9D7S9	76959	Chmp5	FALSE	Charged multivesicular body protein 5 OS=Mus musculus OX=10090 GN=Chmp5 PE=1 SV=1	40	6	120	6	44.779	365.87	6	24.6	1.07567e+07	1.64929e+07	2.01639e+07	2.01639e+07	1.21126e+07	1.22757e+07	8.28412e+06	1.52024e+07	1.81964e+07	1.39938e+07	1.20483e+07	1.84597e+07	1.57087e+07	6	6	6	6	6	6	6	6	6	6	6	6	6	6	6	6	6	6	6	6	6	6	6	6
Q9Z1R2	224727	Bag6	FALSE	Large proline-rich protein BAG6 OS=Mus musculus OX=10090 GN=Bag6 PE=1 SV=1	15	14	120	14	50.977	328.29	14	121	1.40774e+07	2.33306e+07	1.45691e+07	1.45691e+07	1.47466e+07	2.145e+07	1.38606e+07	1.17738e+07	1.29856e+07	2.71479e+07	1.83487e+07	1.3887e+07	1.33399e+07	12	13	11	12	12	12	11	11	12	13	12	12	12	13	11	12	12	12	11	11	12	13	12	12
B2RRE7	73945	Otud4	FALSE	OTU domain-containing protein 4 OS=Mus musculus OX=10090 GN=Otud4 PE=1 SV=1	17	15	120	15	64.782	323.09	15	123	5.2973e+06	1.05772e+07	8.97388e+06	8.97388e+06	5.52438e+06	9.34534e+06	5.40772e+06	8.38181e+06	9.55068e+06	6.94412e+06	5.93307e+06	1.04261e+07	8.85717e+06	13	12	13	12	13	12	13	14	12	12	15	13	13	12	13	12	13	12	13	14	12	12	15	13
P46061	19387	Rangap1	FALSE	Ran GTPase-activating protein 1 OS=Mus musculus OX=10090 GN=Rangap1 PE=1 SV=2	40	16	119	16	81.898	350.32	16	63.5	1.42895e+07	2.38657e+07	1.75586e+07	1.75586e+07	1.66409e+07	2.72093e+07	1.81882e+07	1.35823e+07	1.48113e+07	2.5162e+07	2.13574e+07	1.39826e+07	1.71715e+07	14	14	12	15	15	15	14	14	16	15	13	14	14	14	12	15	15	15	14	14	16	15	13	14
Q9EPJ9	228998	Arfgap1	FALSE	ADP-ribosylation factor GTPase-activating protein 1 OS=Mus musculus OX=10090 GN=Arfgap1 PE=1 SV=2	43	10	119	10	51.222	371.75	10	45.3	7.05207e+06	1.77775e+07	9.8817e+06	9.8817e+06	7.85911e+06	9.78899e+06	6.36665e+06	1.1722e+07	1.26594e+07	6.17362e+06	8.40772e+06	1.48426e+07	1.13018e+07	8	8	7	9	8	8	9	8	8	8	10	10	8	8	7	9	8	8	9	8	8	8	10	10
Q8VCT4	104158	Ces1d	FALSE	Carboxylesterase 1D OS=Mus musculus OX=10090 GN=Ces1d PE=1 SV=1	28	14	119	11	62.634	325.86	14	61.7	7.51792e+06	1.4812e+07	7.85948e+06	7.85948e+06	1.24955e+07	1.81359e+07	1.55017e+07	8.75867e+06	1.01562e+07	1.80669e+07	1.45887e+07	1.68911e+07	1.96584e+07	10	11	8	11	12	11	9	10	11	10	11	10	7	8	6	8	9	8	6	7	8	7	8	7
P10922	14958	H1f0	FALSE	Histone H1.0 OS=Mus musculus OX=10090 GN=H1-0 PE=2 SV=4	32	7	119	7	41.438	325.63	7	20.8	3.54143e+07	77578554	1.01692e+08	1.01692e+08	4.4566e+07	5.97137e+07	3.73899e+07	8.63923e+07	5.67807e+07	5.3971e+07	5.59758e+07	1.0223e+08	5.75472e+07	6	6	7	6	7	6	6	7	7	6	6	6	6	6	7	6	7	6	6	7	7	6	6	6
O88952	22343	Lin7c	FALSE	Protein lin-7 homolog C OS=Mus musculus OX=10090 GN=Lin7c PE=1 SV=2	57	10	119	5	48.447	314.33	10	21.8	1.82926e+07	3.39767e+07	2.40421e+07	2.40421e+07	2.02745e+07	3.63383e+07	2.28863e+07	1.70816e+07	1.90658e+07	3.97911e+07	3.14308e+07	1.74018e+07	2.4015e+07	10	10	10	9	9	9	10	10	10	10	10	10	5	5	5	5	5	5	5	5	5	5	5	5
P11276	14268	Fn1	FALSE	Fibronectin OS=Mus musculus OX=10090 GN=Fn1 PE=1 SV=4	9	14	118	14	64.434	353.25	14	272.4	5.03679e+06	1.04992e+07	4.65164e+06	4.65164e+06	5.9408e+06	8.15656e+06	7.03449e+06	4.6659e+06	8.75299e+06	8.17505e+06	6.75782e+06	9.32832e+06	9.9362e+06	12	12	8	10	13	13	10	12	12	10	12	12	12	12	8	10	13	13	10	12	12	10	12	12
Q7TQD2	72948	Tppp	FALSE	Tubulin polymerization-promoting protein OS=Mus musculus OX=10090 GN=Tppp PE=1 SV=1	52	11	118	11	42.049	335.4	11	23.6	1.19004e+07	2.12195e+07	2.70592e+07	2.70592e+07	1.41853e+07	1.37142e+07	1.57408e+07	1.71023e+07	2.36389e+07	1.78364e+07	2.57236e+07	2.01437e+07	2.37887e+07	8	9	10	9	8	8	9	9	10	9	9	9	8	9	10	9	8	8	9	9	10	9	9	9
Q62189	53607	Snrpa	FALSE	U1 small nuclear ribonucleoprotein A OS=Mus musculus OX=10090 GN=Snrpa PE=1 SV=3	42	10	118	9	49.141	323.79	10	31.8	1.70898e+07	3.29143e+07	2.46762e+07	2.46762e+07	1.74933e+07	3.06669e+07	1.70674e+07	2.10216e+07	2.11026e+07	2.2996e+07	1.86437e+07	2.52684e+07	2.61527e+07	9	8	9	8	9	8	9	9	9	9	9	9	8	7	8	7	8	7	8	8	8	8	8	8
Q8BUV3	268566	Gphn	FALSE	Gephyrin OS=Mus musculus OX=10090 GN=Gphn PE=1 SV=2	13	8	118	8	34.876	305.55	8	83.2	1.01375e+07	2.64827e+07	7.46073e+06	7.46073e+06	1.12906e+07	1.90617e+07	1.17863e+07	1.08216e+07	1.0006e+07	8.19336e+06	1.83851e+07	1.56329e+07	1.41078e+07	8	8	7	8	8	8	8	8	7	8	8	8	8	8	7	8	8	8	8	8	7	8	8	8
Q9CR29	52715	Ccdc43	FALSE	Coiled-coil domain-containing protein 43 OS=Mus musculus OX=10090 GN=Ccdc43 PE=1 SV=1	46	9	118	9	50.376	352.14	9	25	1.03861e+07	1.81269e+07	1.93232e+07	1.93232e+07	1.23175e+07	1.36481e+07	9.80882e+06	1.55994e+07	1.71475e+07	1.6491e+07	1.36739e+07	2.0144e+07	1.70619e+07	9	9	9	9	9	9	8	9	9	8	9	9	9	9	9	9	9	9	8	9	9	8	9	9
Q62264	21835	Thrsp	FALSE	Thyroid hormone-inducible hepatic protein OS=Mus musculus OX=10090 GN=Thrsp PE=1 SV=1	61	6	118	6	52.493	346.44	6	17.1	1.77358e+07	3.67603e+07	1.10048e+07	1.10048e+07	1.16869e+07	1.34684e+07	1.18889e+07	1.43532e+07	1.98636e+07	6.16436e+07	2.43288e+07	7.24889e+06	1.84374e+07	6	6	5	5	6	6	6	6	6	6	5	6	6	6	5	5	6	6	6	6	6	6	5	6
Q9D2M8	70620	Ube2v2	FALSE	Ubiquitin-conjugating enzyme E2 variant 2 OS=Mus musculus OX=10090 GN=Ube2v2 PE=1 SV=4	56	7	117	2	32.977	286.03	7	16.4	218501	244946	1.42729e+06	1.42729e+06	1.21552e+06	223184	337361	1.01884e+06	1.51845e+06	202148	333939	264707	260638	7	6	7	7	7	7	7	7	6	6	6	6	2	1	2	2	2	2	2	2	1	1	1	1
Q8K2C7	216440	Os9	FALSE	Protein OS-9 OS=Mus musculus OX=10090 GN=Os9 PE=1 SV=2	31	17	117	17	76.419	329.06	17	76.1	7.57248e+06	1.23976e+07	6.99615e+06	6.99615e+06	6.40203e+06	5.86266e+06	6.55949e+06	5.39503e+06	8.84673e+06	1.33822e+07	9.2863e+06	6110734	6.44064e+06	17	15	13	15	13	14	13	16	16	16	16	14	17	15	13	15	13	14	13	16	16	16	16	14
Q9QY24	58203	Zbp1	FALSE	Z-DNA-binding protein 1 OS=Mus musculus OX=10090 GN=Zbp1 PE=1 SV=1	46	13	117	13	81.075	354.98	13	44.3	2.9244e+06	3.73408e+06	3.98318e+06	3.98318e+06	6.639e+06	6.50292e+06	3.51702e+06	3.52707e+06	1.51215e+07	1.86026e+06	5.51624e+06	9.87247e+06	1.08437e+07	10	7	8	11	10	12	11	13	7	11	12	13	10	7	8	11	10	12	11	13	7	11	12	13
Q9QZ23	56748	Nfu1	TRUE	NFU1 iron-sulfur cluster scaffold homolog, mitochondrial OS=Mus musculus OX=10090 GN=Nfu1 PE=1 SV=2	43	7	116	7	40.35	297.78	7	28.5	29552458	5.86202e+07	5.52234e+07	5.52234e+07	3.19335e+07	4.06351e+07	2.88866e+07	4.78861e+07	50439588	7.45077e+07	4.8049e+07	7.30994e+07	4.75665e+07	5	6	5	5	6	6	6	7	7	7	7	6	5	6	5	5	6	6	6	7	7	7	7	6
P21126	27643	Ubl4a	FALSE	Ubiquitin-like protein 4A OS=Mus musculus OX=10090 GN=Ubl4a PE=1 SV=1	55	8	116	8	41.075	292.53	8	17.8	1.07675e+07	2.35235e+07	1.91492e+07	1.91492e+07	1.12589e+07	1.4032e+07	1.09225e+07	1.54022e+07	1.78236e+07	2.14597e+07	1.43116e+07	1.83024e+07	1.58261e+07	8	8	8	8	8	8	8	8	8	8	8	8	8	8	8	8	8	8	8	8	8	8	8	8
Q9CQJ6	68184	Denr	FALSE	Density-regulated protein OS=Mus musculus OX=10090 GN=Denr PE=1 SV=1	45	8	116	8	37.491	347.29	8	22.2	1.29645e+07	2.20279e+07	1.3308e+07	1.3308e+07	1.36036e+07	1.98611e+07	1.40038e+07	1.16477e+07	1.39816e+07	2.20363e+07	1.81695e+07	1.10716e+07	1.60755e+07	8	7	6	7	8	8	7	8	8	8	7	8	8	7	6	7	8	8	7	8	8	8	7	8
Q71LX4	70549	Tln2	FALSE	Talin-2 OS=Mus musculus OX=10090 GN=Tln2 PE=1 SV=3	9	17	116	8	66.915	342.37	17	253.5	394626	952838	276172	276172	565785	1.05065e+06	166946	611372	575233	234861	483199	885637	282956	12	13	8	13	14	10	13	13	11	11	13	9	4	4	1	4	5	2	4	4	2	3	5	1
Q05915	14528	Gch1	FALSE	GTP cyclohydrolase 1 OS=Mus musculus OX=10090 GN=Gch1 PE=1 SV=1	42	8	116	8	36.6	299.22	8	27	5.35342e+06	1.72002e+07	7.68346e+06	7.68346e+06	8.4952e+06	9.27728e+06	4.82184e+06	9.51611e+06	8.12171e+06	3.05024e+06	9.3448e+06	1.27938e+07	1.13848e+07	8	8	8	8	8	8	8	8	6	8	8	8	8	8	8	8	8	8	8	8	6	8	8	8
Q60973	245688	Rbbp7	FALSE	Histone-binding protein RBBP7 OS=Mus musculus OX=10090 GN=Rbbp7 PE=1 SV=1	30	11	116	4	46.667	283.65	11	47.8	2.2119e+06	1.51887e+06	812043	812043	1.58399e+06	3.37011e+06	2.35037e+06	455506	835816	3.10259e+06	3.82966e+06	297015	1.65825e+06	11	9	10	10	10	11	10	9	10	11	8	10	4	2	3	3	4	4	3	2	3	4	1	3
Q8CHT0	212647	Aldh4a1	TRUE	Delta-1-pyrroline-5-carboxylate dehydrogenase, mitochondrial OS=Mus musculus OX=10090 GN=Aldh4a1 PE=1 SV=3	29	12	115	12	56.752	342.81	12	61.8	9.19413e+06	1.60611e+07	1.12023e+07	1.12023e+07	1.47865e+07	2.64883e+07	1.72389e+07	1.08648e+07	1.25998e+07	3.2261e+07	2.05336e+07	1.88734e+07	1.80963e+07	11	11	10	12	11	12	10	11	12	12	11	12	11	11	10	12	11	12	10	11	12	12	11	12
Q91VA0	117147	Acsm1	TRUE	Acyl-coenzyme A synthetase ACSM1, mitochondrial OS=Mus musculus OX=10090 GN=Acsm1 PE=1 SV=1	25	11	115	11	57.468	375.46	11	64.7	1.28539e+07	2.29749e+07	3.16232e+07	3.16232e+07	1.94876e+07	3.50085e+07	1.91288e+07	2.509e+07	2.13983e+07	3.70975e+07	3.20759e+07	3.6919e+07	2.5312e+07	10	8	9	11	10	10	9	9	10	10	10	10	10	8	9	11	10	10	9	9	10	10	10	10
P01837	16071	Igkc	FALSE	Immunoglobulin kappa constant OS=Mus musculus OX=10090 GN=Igkc PE=1 SV=2	81	7	115	7	34.897	310.3	7	11.9	1.94318e+07	2.53976e+07	1.62738e+07	1.62738e+07	2.14214e+07	2.81654e+07	2.3054e+07	1.2444e+07	1.65869e+07	2.43834e+07	2.34315e+07	2.84716e+07	1.96767e+07	7	5	4	7	6	7	5	7	6	7	7	6	7	5	4	7	6	7	5	7	6	7	7	6
P42225	20846	Stat1	FALSE	Signal transducer and activator of transcription 1 OS=Mus musculus OX=10090 GN=Stat1 PE=1 SV=1	24	14	115	14	61.749	334.57	14	87.1	7.57235e+06	2.28763e+07	1.35016e+07	1.35016e+07	8.90109e+06	1.59797e+07	1.01254e+07	1.16145e+07	2.38954e+07	1.0569e+07	1.11653e+07	1.79096e+07	1.82257e+07	13	14	12	13	13	13	12	13	11	12	13	13	13	14	12	13	13	13	12	13	11	12	13	13
P57759	67397	Erp29	FALSE	Endoplasmic reticulum resident protein 29 OS=Mus musculus OX=10090 GN=Erp29 PE=1 SV=2	42	9	115	9	37.438	288.25	9	28.8	1.63296e+07	2.71009e+07	1.39585e+07	1.39585e+07	1.39946e+07	1.86885e+07	1.87754e+07	1.18262e+07	1.22205e+07	3.1817e+07	1.89593e+07	8.34741e+06	2.01584e+07	7	8	7	7	7	8	6	7	9	6	6	6	7	8	7	7	7	8	6	7	9	6	6	6
Q9R0H0	11430	Acox1	FALSE	Peroxisomal acyl-coenzyme A oxidase 1 OS=Mus musculus OX=10090 GN=Acox1 PE=1 SV=5	30	13	115	13	54.677	316.55	13	74.6	7.13621e+06	1.56404e+07	8.06997e+06	8.06997e+06	7.65647e+06	1.17826e+07	6.7911e+06	7.40831e+06	5.39327e+06	1.23777e+07	9.08987e+06	9.0111e+06	9.67761e+06	10	11	9	12	13	12	10	9	11	12	11	11	10	11	9	12	13	12	10	9	11	12	11	11
P56812	56330	Pdcd5	FALSE	Programmed cell death protein 5 OS=Mus musculus OX=10090 GN=Pdcd5 PE=1 SV=3	56	7	115	7	33.846	339.02	7	14.3	4.59769e+07	1.08178e+08	1.08052e+08	1.08052e+08	6.33722e+07	7.88796e+07	5.38366e+07	70170999	86517992	7.79946e+07	63778646	9.64884e+07	8.06124e+07	7	7	7	7	7	7	7	7	7	7	7	7	7	7	7	7	7	7	7	7	7	7	7	7
Q9D6J6	72900	Ndufv2	TRUE	NADH dehydrogenase [ubiquinone] flavoprotein 2, mitochondrial OS=Mus musculus OX=10090 GN=Ndufv2 PE=1 SV=2	36	8	115	8	36.179	322.81	8	27.3	4.73392e+07	7.73574e+07	3.80826e+07	3.80826e+07	5.31165e+07	9.25258e+07	8.4916e+07	1.3448e+07	1.40454e+07	3.26943e+07	52131528	4.94345e+06	3.08206e+07	8	8	7	8	8	8	8	8	8	8	6	8	8	8	7	8	8	8	8	8	8	8	6	8
Q9D0S9	68917	Hint2	TRUE	Adenosine 5'-monophosphoramidase HINT2 OS=Mus musculus OX=10090 GN=Hint2 PE=1 SV=1	56	7	115	7	47.609	359.49	7	17.3	4.01958e+07	5.70548e+07	2.96989e+07	2.96989e+07	4.89971e+07	7.9448e+07	6.70917e+07	2.77824e+07	3.84598e+07	1.54872e+08	7.91022e+07	2.37859e+07	5.0109e+07	7	7	6	7	7	7	7	7	7	7	7	7	7	7	6	7	7	7	7	7	7	7	7	7
Q8VEK3	51810	Hnrnpu	FALSE	Heterogeneous nuclear ribonucleoprotein U OS=Mus musculus OX=10090 GN=Hnrnpu PE=1 SV=1	10	6	115	6	32.053	373.35	6	87.9	1.22347e+07	4.90631e+07	2.93142e+07	2.93142e+07	2.08157e+07	3.9208e+07	1.72397e+07	3.02504e+07	3.41699e+07	1.40122e+07	1.73979e+07	3.33666e+07	2.66529e+07	6	6	6	6	6	6	6	6	6	6	6	6	6	6	6	6	6	6	6	6	6	6	6	6
Q9CZY3	66589	Ube2v1	FALSE	Ubiquitin-conjugating enzyme E2 variant 1 OS=Mus musculus OX=10090 GN=Ube2v1 PE=1 SV=1	62	8	115	3	34.699	285.75	8	16.3	5.4422e+07	9.45696e+07	5.76905e+07	5.76905e+07	6.03455e+07	8.7136e+07	6.05186e+07	4.92055e+07	5.39841e+07	1.00484e+08	9.19173e+07	4.53771e+07	7.16052e+07	8	8	8	8	8	8	8	7	8	7	7	8	3	3	3	3	3	3	3	2	3	2	2	3
P10637	17762	Mapt	FALSE	Microtubule-associated protein tau OS=Mus musculus OX=10090 GN=Mapt PE=1 SV=3	39	18	115	18	75.285	314.03	18	76.2	3.42768e+06	6003080	8.65657e+06	8.65657e+06	7.49129e+06	8.43744e+06	3.77069e+06	5.56657e+06	7.20936e+06	5.13323e+06	7.30405e+06	1.16123e+07	9.40434e+06	13	14	13	16	15	14	16	14	12	15	16	17	13	14	13	16	15	14	16	14	12	15	16	17
Q9DCL8	66849	Ppp1r2	FALSE	Protein phosphatase inhibitor 2 OS=Mus musculus OX=10090 GN=Ppp1r2 PE=1 SV=3	66	10	114	10	60.297	360.95	10	23.1	6.90843e+06	1.42634e+07	1.84769e+07	1.84769e+07	1.01768e+07	1.38767e+07	8.96403e+06	1.58011e+07	1.71499e+07	1.1692e+07	1.20551e+07	1.9091e+07	1.65084e+07	9	9	10	10	10	10	9	10	10	9	10	10	9	9	10	10	10	10	9	10	10	9	10	10
P46638	19326	Rab11b	FALSE	Ras-related protein Rab-11B OS=Mus musculus OX=10090 GN=Rab11b PE=1 SV=3	57	11	114	11	44.432	321.85	11	24.5	1.04514e+07	1.32734e+07	4.56373e+06	4.56373e+06	9.9033e+06	2.33031e+07	1.71765e+07	3.10526e+06	3.78392e+06	2.54937e+07	1.66284e+07	2.50709e+06	9.77241e+06	11	10	7	10	11	11	8	8	11	10	8	10	11	10	7	10	11	11	8	8	11	10	8	10
Q9D8L5	67015	Ccdc91	FALSE	Coiled-coil domain-containing protein 91 OS=Mus musculus OX=10090 GN=Ccdc91 PE=1 SV=2	28	13	114	13	48.554	297.55	13	50	6.52789e+06	1.21907e+07	1.30049e+07	1.30049e+07	7.37119e+06	6.60582e+06	5.7722e+06	9.25143e+06	1.09315e+07	8.5026e+06	8.66793e+06	1.2597e+07	9.77611e+06	10	12	13	12	10	12	11	12	10	11	12	12	10	12	13	12	10	12	11	12	10	11	12	12
Q8R0Y6	107747	Aldh1l1	TRUE	Cytosolic 10-formyltetrahydrofolate dehydrogenase OS=Mus musculus OX=10090 GN=Aldh1l1 PE=1 SV=1	18	13	114	11	55.778	295.55	13	98.6	9.53328e+06	1.39869e+07	8.00134e+06	8.00134e+06	9.38376e+06	1.75687e+07	1.41517e+07	5.39179e+06	6.5166e+06	1.60075e+07	1.39133e+07	6.22821e+06	1.23604e+07	12	12	11	13	13	13	11	9	12	13	11	12	11	11	10	11	11	11	10	9	10	11	11	11
Q9WVA2	30058	Timm8a1	TRUE	Mitochondrial import inner membrane translocase subunit Tim8 A OS=Mus musculus OX=10090 GN=Timm8a1 PE=1 SV=1	76	5	114	5	38.417	335.31	5	11	7.01486e+07	1.4269e+08	1.43267e+08	1.43267e+08	8.87782e+07	1.26313e+08	6.38851e+07	1.25623e+08	152293949	2.03643e+08	8.19908e+07	2.07853e+08	1.30615e+08	5	5	5	5	5	5	5	5	5	5	5	5	5	5	5	5	5	5	5	5	5	5	5	5
P24369	19035	Ppib	FALSE	Peptidyl-prolyl cis-trans isomerase B OS=Mus musculus OX=10090 GN=Ppib PE=1 SV=2	53	10	113	10	44.089	278.28	10	23.7	1.40261e+07	1.91479e+07	1.39377e+07	1.39377e+07	1.30406e+07	2.20743e+07	1.31656e+07	1.2677e+07	1.58382e+07	2.62936e+07	1.93896e+07	8.807e+06	1.50644e+07	10	10	9	10	10	10	10	10	10	10	9	10	10	10	9	10	10	10	10	10	10	10	9	10
P22361	21405	Hnf1a	FALSE	Hepatocyte nuclear factor 1-alpha OS=Mus musculus OX=10090 GN=Hnf1a PE=1 SV=2	27	10	113	10	60.977	363.23	10	67.2	1.00917e+07	1.38348e+07	1.49107e+07	1.49107e+07	1.06552e+07	1.29663e+07	7.52708e+06	1.2446e+07	1.2404e+07	9.92655e+06	1.16161e+07	1.51355e+07	1.21686e+07	9	9	10	10	8	8	10	10	7	7	10	8	9	9	10	10	8	8	10	10	7	7	10	8
P57784	68981	Snrpa1	FALSE	U2 small nuclear ribonucleoprotein A' OS=Mus musculus OX=10090 GN=Snrpa1 PE=1 SV=2	57	11	113	11	48.301	325.61	11	28.3	1.06474e+07	1.79609e+07	9.42472e+06	9.42472e+06	1.16436e+07	2.3203e+07	1.4302e+07	8.29596e+06	9.36016e+06	1.91286e+07	1.72977e+07	6.91655e+06	1.21733e+07	10	10	9	11	11	10	10	9	11	11	9	11	10	10	9	11	11	10	10	9	11	11	9	11
Q8BHG2	74098	Czib	FALSE	CXXC motif containing zinc binding protein OS=Mus musculus OX=10090 GN=Czib PE=1 SV=1	74	9	113	9	39.138	276.75	9	18	2.72452e+07	4.25802e+07	2.76911e+07	2.76911e+07	2.2948e+07	3.28678e+07	2.33981e+07	27534712	3.01496e+07	52874167	3.53507e+07	2.21735e+07	2.77496e+07	7	8	7	7	7	7	7	9	8	7	7	7	7	8	7	7	7	7	7	9	8	7	7	7
Q569Z5	212880	Ddx46	FALSE	Probable ATP-dependent RNA helicase DDX46 OS=Mus musculus OX=10090 GN=Ddx46 PE=1 SV=2	15	14	113	14	58.853	301.3	14	117.4	7.43929e+06	1.73699e+07	6.8075e+06	6.8075e+06	5.69538e+06	9.07626e+06	8.07436e+06	9.17027e+06	9.27834e+06	6.11437e+06	7.70317e+06	9.38797e+06	9.76947e+06	11	14	9	8	9	10	13	12	8	8	11	10	11	14	9	8	9	10	13	12	8	8	11	10
P63325	67097	Rps10	FALSE	40S ribosomal protein S10 OS=Mus musculus OX=10090 GN=Rps10 PE=1 SV=1	44	8	113	8	31.276	312.07	8	18.9	1.60079e+07	2.5565e+07	1.56311e+07	1.56311e+07	1.61574e+07	2.58065e+07	1.60772e+07	1.52859e+07	1.49497e+07	2.45821e+07	2.12161e+07	1.38111e+07	1.7901e+07	8	8	7	8	8	7	8	8	7	8	8	7	8	8	7	8	8	7	8	8	7	8	8	7
Q8K2T8	54624	Paf1	FALSE	RNA polymerase II-associated factor 1 homolog OS=Mus musculus OX=10090 GN=Paf1 PE=1 SV=1	27	12	113	12	53.122	301.37	12	60.5	6.97163e+06	9.9757e+06	8.83032e+06	8.83032e+06	6.77997e+06	9.81175e+06	5.77066e+06	5.99029e+06	6.88572e+06	8.46948e+06	8.58456e+06	6.61937e+06	7.73208e+06	10	10	11	11	10	9	8	10	10	11	10	10	10	10	11	11	10	9	8	10	10	11	10	10
Q65Z40	218914	Wapl	FALSE	Wings apart-like protein homolog OS=Mus musculus OX=10090 GN=Wapl PE=1 SV=2	12	12	113	12	54.203	338.39	12	134	3.71367e+06	7.43857e+06	7.50896e+06	7.50896e+06	4.93315e+06	6.02904e+06	3.33795e+06	7.12795e+06	6.34439e+06	3502364	4.1361e+06	8.42827e+06	6.65175e+06	10	12	10	11	10	7	11	9	8	7	11	10	10	12	10	11	10	7	11	9	8	7	11	10
Q9JKK1	58244	Stx6	FALSE	Syntaxin-6 OS=Mus musculus OX=10090 GN=Stx6 PE=1 SV=1	68	11	113	11	68.524	356.21	11	29	6.03501e+06	8.26067e+06	7.8953e+06	7.8953e+06	4.28341e+06	6.96381e+06	3.57915e+06	6.45728e+06	7.35846e+06	7.66105e+06	6.69455e+06	6.07024e+06	6.4708e+06	10	10	10	10	10	9	10	11	10	10	10	10	10	10	10	10	10	9	10	11	10	10	10	10
Q9DCB8	74316	Isca2	TRUE	Iron-sulfur cluster assembly 2 homolog, mitochondrial OS=Mus musculus OX=10090 GN=Isca2 PE=1 SV=2	61	9	113	9	34.726	319.9	9	16.7	2.57036e+07	5.00645e+07	4.36945e+07	4.36945e+07	3.09946e+07	4.13167e+07	2.76752e+07	3.8258e+07	4.79269e+07	6.85327e+07	4.51343e+07	6.20804e+07	4.43749e+07	9	8	8	8	8	8	9	9	9	9	9	8	9	8	8	8	8	8	9	9	9	9	9	8
Q91ZP3	14245	Lpin1	FALSE	Phosphatidate phosphatase LPIN1 OS=Mus musculus OX=10090 GN=Lpin1 PE=1 SV=1	26	16	112	16	70.589	322.47	16	101.9	3.4464e+06	7.86454e+06	4.98242e+06	4.98242e+06	7.03745e+06	2.60802e+07	1.26837e+07	5.7788e+06	4.81274e+06	1.85311e+06	1.06183e+07	1.00314e+07	6.52167e+06	12	12	9	12	16	12	12	10	6	13	12	9	12	12	9	12	16	12	12	10	6	13	12	9
Q8R409	192231	Hexim1	FALSE	Protein HEXIM1 OS=Mus musculus OX=10090 GN=Hexim1 PE=1 SV=1	45	9	112	9	52.221	325.1	9	40.2	1.65083e+07	2.74281e+07	3.17205e+07	3.17205e+07	1.81551e+07	2.19455e+07	1.53926e+07	2.31285e+07	2.51482e+07	2.27906e+07	2.09423e+07	3.37047e+07	2.73289e+07	9	8	9	9	8	7	9	9	9	9	9	8	9	8	9	9	8	7	9	9	9	9	9	8
Q9CQZ1	68196	Hsbp1	FALSE	Heat shock factor-binding protein 1 OS=Mus musculus OX=10090 GN=Hsbp1 PE=1 SV=1	82	5	112	5	50.622	314.09	5	8.6	7.31773e+06	1.52244e+07	1.81958e+07	1.81958e+07	7.26971e+06	9.30594e+06	5.83121e+06	1.06448e+07	1.30389e+07	1.01302e+07	6.64616e+06	1.26907e+07	1.01333e+07	5	5	5	5	5	5	5	5	5	5	5	5	5	5	5	5	5	5	5	5	5	5	5	5
P97807	14194	Fh1	TRUE	Fumarate hydratase, mitochondrial OS=Mus musculus OX=10090 GN=Fh PE=1 SV=3	42	13	112	13	63.678	316.76	13	54.3	1.16907e+07	1.53651e+07	1.18613e+07	1.18613e+07	8.0184e+06	1.37545e+07	1.08125e+07	1.12769e+07	1.04535e+07	2.35181e+07	15780635	1.07662e+07	1.20739e+07	11	11	7	11	10	12	11	10	12	12	10	11	11	11	7	11	10	12	11	10	12	12	10	11
P23198	12417	Cbx3	FALSE	Chromobox protein homolog 3 OS=Mus musculus OX=10090 GN=Cbx3 PE=1 SV=2	30	7	112	6	51.586	346.81	7	20.8	6.44734e+06	1.23287e+07	6.83202e+06	6.83202e+06	1.0453e+07	1.8388e+07	1.319e+07	6.9125e+06	7.74073e+06	1.73876e+07	1.63739e+07	7.84749e+06	1.16931e+07	7	6	6	6	7	7	6	6	7	7	7	6	6	5	5	5	6	6	5	5	6	6	6	5
Q91VJ5	54633	Pqbp1	FALSE	Polyglutamine-binding protein 1 OS=Mus musculus OX=10090 GN=Pqbp1 PE=1 SV=1	45	9	112	9	43.16	307.11	9	30.6	1.35161e+07	2.69432e+07	3.22995e+07	3.22995e+07	1.73507e+07	2.3333e+07	1.37671e+07	2.15908e+07	2.68601e+07	2.22725e+07	1.96395e+07	2.19551e+07	2.23034e+07	8	8	9	8	9	8	7	8	8	7	8	9	8	8	9	8	9	8	7	8	8	7	8	9
Q9R1P4	26440	Psma1	FALSE	Proteasome subunit alpha type-1 OS=Mus musculus OX=10090 GN=Psma1 PE=1 SV=1	37	10	112	10	36.487	280.68	10	29.5	7.03461e+06	1.24316e+07	1.03103e+07	1.03103e+07	8.73042e+06	8.27684e+06	7.83714e+06	7.69609e+06	8.39508e+06	8.81567e+06	9.27928e+06	1.02396e+07	7.79059e+06	9	9	9	10	9	9	10	9	9	9	9	9	9	9	9	10	9	9	10	9	9	9	9	9
Q0VGB7	232314	Ppp4r2	FALSE	Serine/threonine-protein phosphatase 4 regulatory subunit 2 OS=Mus musculus OX=10090 GN=Ppp4r2 PE=1 SV=1	42	12	111	12	59.279	356.85	12	46.5	5.34494e+06	8.18746e+06	8.70244e+06	8.70244e+06	5.51284e+06	6.79689e+06	3.04085e+06	9.09217e+06	8.76315e+06	5.14609e+06	4.92531e+06	9.79221e+06	6.90689e+06	9	10	10	10	9	7	10	11	9	9	10	10	9	10	10	10	9	7	10	11	9	9	10	10
Q91W92	104445	Cdc42ep1	FALSE	Cdc42 effector protein 1 OS=Mus musculus OX=10090 GN=Cdc42ep1 PE=1 SV=1	35	10	111	10	50.05	275.45	10	43.1	3.7824e+06	7.87619e+06	7.37432e+06	7.37432e+06	6.18693e+06	7.27324e+06	5.67054e+06	5.97888e+06	6.28988e+06	8.18026e+06	6.94528e+06	6.91708e+06	7.32539e+06	7	8	10	8	9	8	9	8	9	9	9	9	7	8	10	8	9	8	9	8	9	9	9	9
Q03958	14976	Pfdn6	FALSE	Prefoldin subunit 6 OS=Mus musculus OX=10090 GN=Pfdn6 PE=1 SV=1	63	11	111	11	43.587	292.59	11	14.4	2.32847e+07	5.22433e+07	5.14223e+07	5.14223e+07	2.76465e+07	3.7716e+07	2.60561e+07	3.97832e+07	4.1486e+07	3.89922e+07	3.23914e+07	5.12238e+07	4.35546e+07	9	11	11	10	10	9	11	11	11	11	11	11	9	11	11	10	10	9	11	11	11	11	11	11
O54879	15354	Hmgb3	FALSE	High mobility group protein B3 OS=Mus musculus OX=10090 GN=Hmgb3 PE=1 SV=3	45	10	111	9	40.064	322.34	10	23	8.88283e+06	1.70277e+07	1.70121e+07	1.70121e+07	1.32496e+07	1.79804e+07	1.13407e+07	1.372e+07	1.45824e+07	1.63865e+07	1.61251e+07	1.84391e+07	1.7044e+07	8	8	10	9	8	9	9	9	7	9	9	9	8	8	9	9	8	9	9	9	7	9	9	9
Q9JMG1	59022	Edf1	FALSE	Endothelial differentiation-related factor 1 OS=Mus musculus OX=10090 GN=Edf1 PE=1 SV=1	59	11	111	11	46.316	295.04	11	16.4	2.69674e+07	6.24755e+07	5.74456e+07	5.74456e+07	3.03435e+07	3.53774e+07	2.34213e+07	4.71953e+07	5.01461e+07	4.98114e+07	3.21825e+07	5.0452e+07	3.65433e+07	9	9	10	10	9	10	10	10	9	9	10	9	9	9	10	10	9	10	10	10	9	9	10	9
Q9D1K2	66144	Atp6v1f	FALSE	V-type proton ATPase subunit F OS=Mus musculus OX=10090 GN=Atp6v1f PE=1 SV=2	82	8	110	8	43.442	320.16	8	13.4	1.49789e+07	2.75164e+07	1.91495e+07	1.91495e+07	1.76707e+07	2.83675e+07	1.95539e+07	1.40017e+07	1.91501e+07	2.94693e+07	1.99295e+07	1.62999e+07	2.24774e+07	8	8	8	7	8	7	8	7	8	7	7	7	8	8	8	7	8	7	8	7	8	7	7	7
Q9D883	108121	U2af1	FALSE	Splicing factor U2AF 35 kDa subunit OS=Mus musculus OX=10090 GN=U2af1 PE=1 SV=4	40	8	110	8	33.127	309.87	8	27.8	1.66699e+07	2.39069e+07	1.56394e+07	1.56394e+07	1.63758e+07	2.49713e+07	1.85102e+07	1.36361e+07	1.48297e+07	2.71654e+07	2.39731e+07	1.34604e+07	1.75707e+07	8	8	7	8	8	8	7	8	8	8	8	8	8	8	7	8	8	8	7	8	8	8	8	8
Q9CQ80	28084	Vps25	FALSE	Vacuolar protein-sorting-associated protein 25 OS=Mus musculus OX=10090 GN=Vps25 PE=1 SV=1	69	12	110	12	49.893	348.65	12	20.7	8.06062e+06	1.6507e+07	6.88641e+06	6.88641e+06	9.24298e+06	1.69002e+07	1.39472e+07	3.78505e+06	5.28539e+06	2.44808e+07	1.61607e+07	4.94223e+06	1.00073e+07	12	12	9	12	12	12	9	9	12	12	9	11	12	12	9	12	12	12	9	9	12	12	9	11
Q9D9K3	74268	Aven	FALSE	Cell death regulator Aven OS=Mus musculus OX=10090 GN=Aven PE=1 SV=2	37	10	110	10	57.107	331.19	10	37.2	6.51243e+06	9.17153e+06	1.04777e+07	1.04777e+07	6.17109e+06	5.51233e+06	4.0648e+06	9.03319e+06	1.05449e+07	7.42719e+06	5.95834e+06	1.13036e+07	8.57308e+06	9	9	9	9	9	8	10	10	9	9	9	9	9	9	9	9	9	8	10	10	9	9	9	9
O35857	21856	Timm44	TRUE	Mitochondrial import inner membrane translocase subunit TIM44 OS=Mus musculus OX=10090 GN=Timm44 PE=1 SV=2	19	10	109	10	45.549	294.62	10	51.1	7.28927e+06	1.60511e+07	1.69395e+07	1.69395e+07	1.09754e+07	1.47056e+07	9.20152e+06	1.64011e+07	1.4902e+07	1.90672e+07	1.19272e+07	2.42478e+07	1.36498e+07	10	9	10	10	10	10	10	10	10	10	10	10	10	9	10	10	10	10	10	10	10	10	10	10
A2AQ25	208618	Etl4	FALSE	Sickle tail protein OS=Mus musculus OX=10090 GN=Skt PE=1 SV=1	14	18	109	18	74.641	333.21	18	212.9	3.45818e+07	5.83049e+07	4.8446e+07	4.8446e+07	3.39322e+07	3.93827e+07	4.24509e+07	4.39478e+07	4.47667e+07	4.46224e+07	4.52998e+07	6.07094e+07	4.61454e+07	12	10	11	12	11	13	14	11	10	11	13	12	12	10	11	12	11	13	14	11	10	11	13	12
Q3UMY5	78798	Eml4	FALSE	Echinoderm microtubule-associated protein-like 4 OS=Mus musculus OX=10090 GN=Eml4 PE=1 SV=1	9	10	109	10	57.13	303.27	10	110	1.11112e+07	2.71688e+07	1.52885e+07	1.52885e+07	1.50712e+07	1.74072e+07	1.2659e+07	1.78164e+07	1.83945e+07	1.01116e+07	1.66641e+07	2.51497e+07	1.99678e+07	9	9	7	9	9	9	9	9	9	9	9	10	9	9	7	9	9	9	9	9	9	9	9	10
Q9CZG3	27784	Commd8	FALSE	COMM domain-containing protein 8 OS=Mus musculus OX=10090 GN=Commd8 PE=1 SV=1	55	8	109	8	42.65	372.36	8	20.8	6.37853e+06	1.2336e+07	1.02634e+07	1.02634e+07	7.49847e+06	1.08574e+07	6.07737e+06	9.40798e+06	8.19866e+06	1.35549e+07	1.1467e+07	1.03384e+07	1.14392e+07	5	5	6	7	6	6	6	6	7	8	7	7	5	5	6	7	6	6	6	6	7	8	7	7
Q9CWS0	69219	Ddah1	FALSE	N(G),N(G)-dimethylarginine dimethylaminohydrolase 1 OS=Mus musculus OX=10090 GN=Ddah1 PE=1 SV=3	59	15	109	15	65.846	274.24	15	31.4	1.58739e+07	2.2009e+07	2.44774e+06	2.44774e+06	1.97123e+07	3.59662e+07	4.45977e+07	3.3546e+06	3.23433e+06	2.58087e+07	3.6777e+07	3.32425e+06	2.13663e+07	13	13	6	13	14	15	10	9	13	13	6	12	13	13	6	13	14	15	10	9	13	13	6	12
Q61687	22589	Atrx	FALSE	Transcriptional regulator ATRX OS=Mus musculus OX=10090 GN=Atrx PE=1 SV=3	9	15	109	15	63.512	291.82	15	278.4	3.98548e+06	6.68116e+06	7.11501e+06	7.11501e+06	4.10039e+06	5.40528e+06	3.68245e+06	6.79851e+06	7.69444e+06	5.54345e+06	5.91774e+06	8.01801e+06	6.23634e+06	11	14	13	15	14	12	15	15	13	14	15	14	11	14	13	15	14	12	15	15	13	14	15	14
Q9CWE0	76824	Mtfr1l	TRUE	Mitochondrial fission regulator 1-like OS=Mus musculus OX=10090 GN=Mtfr1l PE=1 SV=1	50	12	109	12	64.574	301.46	12	31.7	1.61928e+07	3.24791e+07	2.46353e+07	2.46353e+07	1.84241e+07	2.61886e+07	1.80005e+07	2.79429e+07	2.62727e+07	5.60511e+07	2.97037e+07	4.49573e+07	2.95182e+07	12	12	12	11	12	12	12	12	12	12	12	12	12	12	12	11	12	12	12	12	12	12	12	12
O88447	16593	Klc1	FALSE	Kinesin light chain 1 OS=Mus musculus OX=10090 GN=Klc1 PE=1 SV=3	31	14	109	9	61.608	288.38	14	61.4	2.71978e+06	4.83406e+06	3.32172e+06	3.32172e+06	3.05155e+06	3.81133e+06	2.2227e+06	3.08306e+06	3.68643e+06	4.98591e+06	4.61859e+06	3.27438e+06	4827055	13	13	11	12	12	12	13	13	13	13	13	13	8	8	6	7	7	7	8	8	8	8	9	8
Q91Z38	66827	Ttc1	FALSE	Tetratricopeptide repeat protein 1 OS=Mus musculus OX=10090 GN=Ttc1 PE=1 SV=1	44	10	109	10	49.842	331.94	10	33.2	1.47465e+07	1.858e+07	2.35031e+07	2.35031e+07	1.1763e+07	1.44696e+07	8.34688e+06	1.67461e+07	2.28579e+07	1.30271e+07	1.24995e+07	1.8699e+07	2.03954e+07	10	9	9	9	8	9	9	10	7	8	10	10	10	9	9	9	8	9	9	10	7	8	10	10
P42669	19290	Pura	FALSE	Transcriptional activator protein Pur-alpha OS=Mus musculus OX=10090 GN=Pura PE=1 SV=1	64	10	109	10	54.299	349.64	10	34.9	2.18314e+07	2.42205e+07	1.75347e+07	1.75347e+07	1.95962e+07	2.83266e+07	2.3144e+07	1.61252e+07	1.76631e+07	36268477	3.13335e+07	1.35484e+07	2.31785e+07	9	9	9	10	9	9	9	9	9	9	9	9	9	9	9	10	9	9	9	9	9	9	9	9
Q6DVA0	224640	Lemd2	FALSE	LEM domain-containing protein 2 OS=Mus musculus OX=10090 GN=Lemd2 PE=1 SV=1	22	10	108	10	43.7	289.47	10	57.5	4.95461e+06	6.96547e+06	6.75587e+06	6.75587e+06	4.39278e+06	5.53563e+06	4.23009e+06	6.87466e+06	7.8413e+06	7.67783e+06	5.40422e+06	7.11533e+06	6.2367e+06	9	9	10	10	9	10	10	10	10	10	10	9	9	9	10	10	9	10	10	10	10	10	10	9
Q8BQ47	66455	Cnpy4	FALSE	Protein canopy homolog 4 OS=Mus musculus OX=10090 GN=Cnpy4 PE=1 SV=1	45	9	108	9	46.289	318.95	9	28.1	7.53772e+06	1.1904e+07	1.2521e+07	1.2521e+07	9604692	1.21823e+07	7.39329e+06	9.36713e+06	1.28979e+07	1.03246e+07	1.05395e+07	1.48367e+07	1.15397e+07	9	9	9	9	9	9	9	9	9	9	9	9	9	9	9	9	9	9	9	9	9	9	9	9
Q810V0	67973	Mphosph10	FALSE	U3 small nucleolar ribonucleoprotein protein MPP10 OS=Mus musculus OX=10090 GN=Mphosph10 PE=1 SV=2	25	11	108	11	52.577	337.42	11	78.7	5.35515e+06	7.20441e+06	8.62283e+06	8.62283e+06	4.69013e+06	6.78755e+06	3.92752e+06	8.13715e+06	6.73852e+06	6.32584e+06	6.729e+06	8.10459e+06	6.92766e+06	11	10	11	10	10	10	11	11	10	11	11	11	11	10	11	10	10	10	11	11	10	11	11	11
Q9JK92	80888	Hspb8	FALSE	Heat shock protein beta-8 OS=Mus musculus OX=10090 GN=Hspb8 PE=1 SV=1	54	9	108	9	32.05	248.01	9	21.5	1.75957e+07	3.12681e+07	1.91472e+07	1.91472e+07	1.54643e+07	2.27393e+07	1.67719e+07	1.9466e+07	1.8782e+07	2.99358e+07	2.0514e+07	1.4664e+07	1.48798e+07	9	9	8	9	9	9	9	9	9	9	8	9	9	9	8	9	9	9	9	9	9	9	8	9
Q62313	22134	Tgoln1	FALSE	Trans-Golgi network integral membrane protein 1 OS=Mus musculus OX=10090 GN=Tgoln1 PE=1 SV=1	45	11	108	11	47.333	255.47	11	37.8	7.79866e+06	8.40671e+06	9.47109e+06	9.47109e+06	8.66124e+06	5.28211e+06	4.08498e+06	7.38952e+06	8.47011e+06	9.50626e+06	5.0837e+06	6.94577e+06	7.97073e+06	9	8	8	10	8	9	8	9	8	9	8	8	9	8	8	10	8	9	8	9	8	9	8	8
D3YZP9	76551	Ccdc6	FALSE	Coiled-coil domain-containing protein 6 OS=Mus musculus OX=10090 GN=Ccdc6 PE=1 SV=1	30	13	108	13	41.625	287.46	13	52.9	7.04735e+06	9.63121e+06	8.40702e+06	8.40702e+06	6.87636e+06	8.47054e+06	6.63378e+06	6.82752e+06	6.6457e+06	9.62092e+06	8.36926e+06	6.58283e+06	8.76589e+06	12	12	12	12	11	12	11	12	12	13	12	12	12	12	12	12	11	12	11	12	12	13	12	12
Q7TMK6	170833	Hook2	FALSE	Protein Hook homolog 2 OS=Mus musculus OX=10090 GN=Hook2 PE=1 SV=3	32	16	108	16	68.335	308.88	16	83.3	7.19359e+06	1.22851e+07	5.97583e+06	5.97583e+06	6.48347e+06	5.29407e+06	5.63515e+06	6.06781e+06	7.0502e+06	1.35676e+07	5.90816e+06	6.60591e+06	8.23618e+06	16	16	12	16	13	13	16	15	16	15	14	15	16	16	12	16	13	13	16	15	16	15	14	15
Q8R332	71844	Nupl1	FALSE	Nucleoporin p58/p45 OS=Mus musculus OX=10090 GN=Nup58 PE=1 SV=1	22	10	108	10	41.024	291.36	10	59.4	7.0969e+06	1.2583e+07	1.03272e+07	1.03272e+07	7.65799e+06	9.0863e+06	6.38439e+06	9.94132e+06	8.78716e+06	1.05283e+07	8.83422e+06	1.08335e+07	9.50328e+06	9	10	10	9	9	9	9	9	10	9	9	8	9	10	10	9	9	9	9	9	10	9	9	8
P23506	18537	Pcmt1	FALSE	Protein-L-isoaspartate(D-aspartate) O-methyltransferase OS=Mus musculus OX=10090 GN=Pcmt1 PE=1 SV=3	55	8	108	8	50.291	318.74	8	24.6	9.9623e+06	1.80323e+07	7.15059e+06	7.15059e+06	1.05621e+07	1.55683e+07	1.492e+07	6.98302e+06	7.63699e+06	2.37271e+07	1.80995e+07	6.53946e+06	1.49946e+07	8	8	7	8	8	8	8	8	8	8	8	8	8	8	7	8	8	8	8	8	8	8	8	8
P26043	19684	Rdx	FALSE	Radixin OS=Mus musculus OX=10090 GN=Rdx PE=1 SV=3	15	10	107	9	41.288	322.05	10	68.5	9.70433e+06	2.11378e+07	1.41316e+07	1.41316e+07	1.00237e+07	1.83577e+07	1.01431e+07	1.78504e+07	1.61581e+07	8.11964e+06	1.03697e+07	2.16121e+07	1.5808e+07	9	9	9	8	9	10	10	10	8	9	10	10	8	8	8	7	8	9	9	9	7	8	9	9
Q9D8B3	75608	Chmp4b	FALSE	Charged multivesicular body protein 4b OS=Mus musculus OX=10090 GN=Chmp4b PE=1 SV=2	39	8	107	8	33.569	345.65	8	24.9	2.15851e+07	4.16274e+07	4.36621e+07	4.36621e+07	2.57065e+07	3.61527e+07	2.04893e+07	3.49907e+07	4.10324e+07	2.68396e+07	2.87789e+07	4.18153e+07	3.38859e+07	8	8	8	8	8	8	8	8	8	8	8	8	8	8	8	8	8	8	8	8	8	8	8	8
P49312	15382	Hnrnpa1	FALSE	Heterogeneous nuclear ribonucleoprotein A1 OS=Mus musculus OX=10090 GN=Hnrnpa1 PE=1 SV=2	35	11	107	7	49.757	290.29	11	34.2	3.06733e+06	4.03585e+06	2.59144e+06	2.59144e+06	4.13117e+06	5.78243e+06	4.10478e+06	2.58724e+06	3.76227e+06	4.00131e+06	4.98483e+06	2.02652e+06	3.84747e+06	10	11	10	11	11	11	10	11	11	11	9	11	6	7	7	7	7	7	6	7	7	7	5	7
Q8R1N0	66983	Zfp830	FALSE	Zinc finger protein 830 OS=Mus musculus OX=10090 GN=Znf830 PE=1 SV=1	50	12	107	12	58.024	330.55	12	40.6	3.80121e+06	7.34374e+06	7.7723e+06	7.7723e+06	5.06835e+06	7.12082e+06	4.09466e+06	6.00673e+06	7.66777e+06	5.44787e+06	5.97377e+06	8.22237e+06	8.00508e+06	10	10	10	11	10	9	11	11	10	10	10	10	10	10	10	11	10	9	11	11	10	10	10	10
Q9CR59	102060	Gadd45gip1	TRUE	Growth arrest and DNA damage-inducible proteins-interacting protein 1 OS=Mus musculus OX=10090 GN=Gadd45gip1 PE=1 SV=1	45	9	107	9	49.527	295.61	9	25.8	1.27867e+07	2.42e+07	1.93569e+07	1.93569e+07	1.15464e+07	1.72728e+07	8.64946e+06	2.57937e+07	2.18618e+07	3.03817e+07	1.58943e+07	2.55443e+07	1.6083e+07	8	9	9	9	9	8	9	9	9	9	9	9	8	9	9	9	9	8	9	9	9	9	9	9
Q8CI08	75991	Slain2	FALSE	SLAIN motif-containing protein 2 OS=Mus musculus OX=10090 GN=Slain2 PE=1 SV=2	22	10	107	10	37.639	295.65	10	62.3	8.06953e+06	1.27335e+07	1.68982e+07	1.68982e+07	1.01827e+07	1.10074e+07	8.39129e+06	1.18832e+07	1.34335e+07	9.52063e+06	9.91343e+06	1.43252e+07	1.36145e+07	10	10	10	10	10	10	10	10	8	10	10	10	10	10	10	10	10	10	10	10	8	10	10	10
Q9D8P4	27397	Mrpl17	TRUE	39S ribosomal protein L17, mitochondrial OS=Mus musculus OX=10090 GN=Mrpl17 PE=1 SV=1	33	7	107	7	24.746	237.13	7	20.2	1.92038e+07	32755646	2.61322e+07	2.61322e+07	1.47108e+07	2.0496e+07	1.40887e+07	2.46967e+07	2.60621e+07	5.06941e+07	24738453	2.48703e+07	2.13067e+07	7	7	7	7	7	7	7	7	7	7	7	7	7	7	7	7	7	7	7	7	7	7	7	7
Q8VCQ3	641340	Nrbf2	FALSE	Nuclear receptor-binding factor 2 OS=Mus musculus OX=10090 GN=Nrbf2 PE=1 SV=1	50	8	107	8	39.653	332.85	8	32.5	5.43161e+06	7.93789e+06	7.17819e+06	7.17819e+06	4.73035e+06	5.91436e+06	3.91687e+06	6.39488e+06	6.64457e+06	6.73024e+06	6.51486e+06	7.51203e+06	6.617e+06	8	8	7	7	7	7	8	8	8	7	8	8	8	8	7	7	7	7	8	8	8	7	8	8
P13597	15894	Icam1	FALSE	Intercellular adhesion molecule 1 OS=Mus musculus OX=10090 GN=Icam1 PE=1 SV=1	23	10	106	10	46.539	290.72	10	58.8	1.08297e+07	1.49126e+07	1.51582e+07	1.51582e+07	1.72846e+07	2.79014e+07	1.15193e+07	1.22209e+07	1.90088e+07	1.9383e+07	1.58354e+07	1.02822e+07	2.02824e+07	9	7	8	10	10	9	9	10	10	9	9	10	9	7	8	10	10	9	9	10	10	9	9	10
Q8CDG3	70675	Vcpip1	FALSE	Deubiquitinating protein VCPIP1 OS=Mus musculus OX=10090 GN=Vcpip1 PE=1 SV=1	11	12	106	12	62.3	320.82	12	134.4	6.78516e+06	1.2836e+07	1.04102e+07	1.04102e+07	7.17855e+06	7.47348e+06	4.85888e+06	9.27985e+06	1.1072e+07	7.55471e+06	6.07503e+06	1.08927e+07	9.00262e+06	12	11	11	12	12	10	10	12	10	12	11	11	12	11	11	12	12	10	10	12	10	12	11	11
P01900	14964	H2-D1	FALSE	H-2 class I histocompatibility antigen, D-D alpha chain OS=Mus musculus OX=10090 GN=H2-D1 PE=1 SV=1	21	8	106	1	30.727	257.45	8	41.1	6.12356e+06	6.13462e+06			3.79173e+06	6.74719e+06	4.69009e+06	4.55882e+06	1.00052e+07	274880	8.87053e+06	4.34221e+06	7.59927e+06	8	8	6	7	7	7	7	7	7	8	7	7	1	1	0	1	1	1	0	1	0	1	1	1
Q62048	18611	Pea15a	FALSE	Astrocytic phosphoprotein PEA-15 OS=Mus musculus OX=10090 GN=Pea15 PE=1 SV=1	63	6	106	6	37.794	349.77	6	15	1.66915e+07	3.01805e+07	28891660	28891660	1.72505e+07	2.61288e+07	1.80709e+07	2.29744e+07	2.89426e+07	2.57984e+07	2.79705e+07	2.98928e+07	3.36585e+07	6	6	6	6	6	6	6	6	6	6	6	6	6	6	6	6	6	6	6	6	6	6	6	6
Q9CQN7	107733	Mrpl41	TRUE	39S ribosomal protein L41, mitochondrial OS=Mus musculus OX=10090 GN=Mrpl41 PE=1 SV=1	57	8	106	8	33.115	293.26	8	15.3	1.47317e+07	2.91368e+07	2.869e+07	2.869e+07	1.19083e+07	1.80604e+07	1.03362e+07	3.03549e+07	2.70837e+07	3.76207e+07	1.89035e+07	2.76578e+07	1.99214e+07	8	8	8	8	8	7	8	8	8	8	8	8	8	8	8	8	8	7	8	8	8	8	8	8
Q8BK30	78330	Ndufv3	TRUE	NADH dehydrogenase [ubiquinone] flavoprotein 3, mitochondrial OS=Mus musculus OX=10090 GN=Ndufv3 PE=1 SV=1	51	5	106	5	23.438	268.09	5	11.8	5.48865e+07	8.40503e+07	1.14476e+08	1.14476e+08	5.02055e+07	6.59156e+07	4.76696e+07	3.80493e+07	3.76286e+07	1.03459e+07	3.62288e+07	1.19996e+07	4.42148e+07	5	4	5	5	5	5	5	5	4	5	5	5	5	4	5	5	5	5	5	5	4	5	5	5
Q6PGH2	52009	Jpt2	FALSE	Jupiter microtubule associated homolog 2 OS=Mus musculus OX=10090 GN=Jpt2 PE=1 SV=1	56	7	106	7	47.121	312.93	7	20	8.317e+06	1.4264e+07	2.26399e+07	2.26399e+07	1.14926e+07	1.29329e+07	7.82967e+06	1.63173e+07	1.90479e+07	1.20248e+07	1.23405e+07	1.77579e+07	1.70243e+07	6	6	7	6	5	5	6	6	6	6	6	6	6	6	7	6	5	5	6	6	6	6	6	6
Q9R269	19041	Ppl	FALSE	Periplakin OS=Mus musculus OX=10090 GN=Ppl PE=1 SV=1	20	28	106	28	96.232	268.66	28	203.9	2.42343e+06	5.03437e+06	5.1919e+06	5.1919e+06	5.13952e+06	4.25895e+06	6.08265e+06	3.99172e+06	5.18221e+06	9.90138e+06	3.86432e+06	3.96073e+06	6.42697e+06	13	17	17	21	19	24	19	20	26	16	18	21	13	17	17	21	19	24	19	20	26	16	18	21
P11688	16402	Itga5	FALSE	Integrin alpha-5 OS=Mus musculus OX=10090 GN=Itga5 PE=1 SV=3	15	13	106	13	42.198	248.5	13	115	6.9672e+06	1.056e+07	6.9804e+06	6.9804e+06	7.84339e+06	1.44049e+07	9.10648e+06	5.17295e+06	5.16712e+06	1.60996e+07	1.10285e+07	3.37837e+06	7.99837e+06	12	11	10	11	12	12	11	8	11	12	9	10	12	11	10	11	12	12	11	8	11	12	9	10
Q9CPT5	28126	Nop16	FALSE	Nucleolar protein 16 OS=Mus musculus OX=10090 GN=Nop16 PE=1 SV=1	48	8	105	8	52.204	261.04	8	21.1	7.61061e+06	1.58348e+07	1.37832e+07	1.37832e+07	5.77338e+06	6.93104e+06	6.266e+06	1.24397e+07	1.05398e+07	1.1145e+07	8.41842e+06	1.12627e+07	1.07939e+07	8	8	8	6	6	8	8	8	8	8	8	8	8	8	8	6	6	8	8	8	8	8	8	8
Q9R0P4	56372	1110004F10Rik	FALSE	Small acidic protein OS=Mus musculus OX=10090 GN=Smap PE=1 SV=1	27	4	105	4	28.821	332.44	4	20	4.11617e+06	9.15958e+06	1.10106e+07	1.10106e+07	6.55792e+06	8.09481e+06	4.86862e+06	8.72292e+06	9.42614e+06	7.45218e+06	6.96624e+06	9955056	7.98343e+06	3	4	4	3	4	3	3	3	4	4	3	4	3	4	4	3	4	3	3	3	4	4	3	4
Q9Z108	20853	Stau1	FALSE	Double-stranded RNA-binding protein Staufen homolog 1 OS=Mus musculus OX=10090 GN=Stau1 PE=1 SV=1	34	15	105	15	63.934	270.47	15	53.9	7.25054e+06	1.22539e+07	4.35616e+06	4.35616e+06	6.27119e+06	1.14555e+07	6.65501e+06	6.78594e+06	5.1193e+06	7.0223e+06	1.04681e+07	6.89017e+06	6.49834e+06	12	12	10	11	13	12	11	13	11	15	13	12	12	12	10	11	13	12	11	13	11	15	13	12
P16332	17850	Mmut	TRUE	Methylmalonyl-CoA mutase, mitochondrial OS=Mus musculus OX=10090 GN=Mmut PE=1 SV=2	18	8	105	8	51.024	334.52	8	82.8	6.89389e+06	1.09647e+07	5.98902e+06	5.98902e+06	6.07386e+06	1.04635e+07	6.82383e+06	7.03876e+06	7.29401e+06	1.1104e+07	1.09573e+07	8.46638e+06	7.05055e+06	7	6	6	7	7	7	7	7	8	7	6	6	7	6	6	7	7	7	7	7	8	7	6	6
P63276	20068	Rps17	FALSE	40S ribosomal protein S17 OS=Mus musculus OX=10090 GN=Rps17 PE=1 SV=2	59	7	105	7	51.593	308.56	7	15.5	3.37849e+07	4.72713e+07	4.08135e+07	4.08135e+07	2.57369e+07	3.48142e+07	2.76196e+07	3.80725e+07	3.39822e+07	4.48882e+07	3.92279e+07	3.23646e+07	3.35275e+07	6	7	7	6	6	7	7	7	7	7	7	7	6	7	7	6	6	7	7	7	7	7	7	7
Q8K2Q0	76501	Commd9	FALSE	COMM domain-containing protein 9 OS=Mus musculus OX=10090 GN=Commd9 PE=1 SV=3	68	9	105	9	40.188	312.78	9	21.8	1.59367e+07	2.71627e+07	2.36765e+07	2.36765e+07	1.70251e+07	2.37155e+07	1.55693e+07	1.8372e+07	2.12178e+07	2.50167e+07	2.1251e+07	2.24431e+07	2.38275e+07	8	8	8	8	8	8	8	8	8	8	8	8	8	8	8	8	8	8	8	8	8	8	8	8
Q05793	15530	Hspg2	FALSE	Basement membrane-specific heparan sulfate proteoglycan core protein OS=Mus musculus OX=10090 GN=Hspg2 PE=1 SV=1	4	13	105	13	47.383	266.06	13	398	2.15866e+07	4.12632e+07	1.91188e+07	1.91188e+07	2.46511e+07	3.0803e+07	2.43431e+07	2.19602e+07	2.22095e+07	2.94831e+07	2.24358e+07	2.45617e+07	2.14189e+07	13	13	11	11	12	13	13	13	10	11	13	13	13	13	11	11	12	13	13	13	10	11	13	13
Q8BU11	268741	Tox4	FALSE	TOX high mobility group box family member 4 OS=Mus musculus OX=10090 GN=Tox4 PE=1 SV=3	14	7	105	7	30.579	284.53	7	65.9	3.24e+06	5.71612e+06	5.3385e+06	5.3385e+06	4.57073e+06	5.9813e+06	3.36183e+06	4.47521e+06	5.02067e+06	4.71823e+06	4.68654e+06	5.00729e+06	4.8962e+06	6	6	6	7	7	7	7	6	7	7	6	6	6	6	6	7	7	7	7	6	7	7	6	6
Q61301	12386	Ctnna2	FALSE	Catenin alpha-2 OS=Mus musculus OX=10090 GN=Ctnna2 PE=1 SV=3	11	9	105	1	39.602	270.32	9	105.2	3319628	3.35256e+06	2.42747e+06	2.42747e+06	3.41938e+06	6.34068e+06	4.42275e+06	2052058	2.24359e+06	4997266	3298674	1.57089e+06	3650979	8	9	8	8	8	8	8	9	9	9	8	8	1	1	1	1	1	1	1	1	1	1	1	1
Q6NZN0	74213	Rbm26	FALSE	RNA-binding protein 26 OS=Mus musculus OX=10090 GN=Rbm26 PE=1 SV=2	23	20	104	19	65.553	245.85	20	114.1	6.24654e+06	1.13383e+07	7.90947e+06	7.90947e+06	7.37736e+06	1.08304e+07	6.1322e+06	7.22237e+06	8.19798e+06	7.073e+06	8.9105e+06	7.91446e+06	7.88948e+06	16	19	18	16	18	11	19	18	13	18	17	17	15	18	17	15	17	10	18	17	12	17	16	16
Q9ERR1	83431	Ndel1	FALSE	Nuclear distribution protein nudE-like 1 OS=Mus musculus OX=10090 GN=Ndel1 PE=1 SV=2	37	11	104	8	41.21	290.79	11	38.3	6.27497e+06	9.08329e+06	1.02054e+07	1.02054e+07	5.56788e+06	6.4576e+06	4.33868e+06	7.54733e+06	7.49559e+06	6.67e+06	6.59008e+06	9.03618e+06	6.96911e+06	9	10	10	9	9	10	9	10	9	10	10	10	6	7	7	6	6	7	6	7	6	7	7	7
O54941	57376	Smarce1	FALSE	SWI/SNF-related matrix-associated actin-dependent regulator of chromatin subfamily E member 1 OS=Mus musculus OX=10090 GN=Smarce1 PE=1 SV=1	25	8	104	8	41.047	269.63	8	46.6	3.65265e+06	6.43155e+06	3.81908e+06	3.81908e+06	3.84026e+06	6.90272e+06	4.17208e+06	2.66213e+06	3.55701e+06	6.68957e+06	5.44186e+06	3.57975e+06	4.8233e+06	8	8	8	8	8	8	8	8	8	8	8	8	8	8	8	8	8	8	8	8	8	8	8	8
Q7TPM1	227723	Prrc2b	FALSE	Protein PRRC2B OS=Mus musculus OX=10090 GN=Prrc2b PE=1 SV=1	21	21	104	18	77.71	277.9	21	160.8	2.66856e+06	3.889e+06	4.04479e+06	4.04479e+06	2.42535e+06	2.02126e+06	1.24914e+06	3.27694e+06	4.55197e+06	3.35408e+06	1.52144e+06	3.42144e+06	2.32229e+06	14	14	16	15	13	11	15	19	14	11	14	13	11	11	13	12	11	9	12	16	11	8	11	10
Q8K2F8	67070	Lsm14a	FALSE	Protein LSM14 homolog A OS=Mus musculus OX=10090 GN=Lsm14a PE=1 SV=1	21	10	104	10	32.384	242.39	10	50.5	6.91703e+06	1.2212e+07	1.07459e+07	1.07459e+07	6.16268e+06	1.04817e+07	6.90089e+06	1.07769e+07	8.85594e+06	8.23759e+06	8.99293e+06	1.3831e+07	1.13779e+07	9	9	9	8	10	9	9	8	9	9	9	9	9	9	9	8	10	9	9	8	9	9	9	9
A2AS89	75986	Agmat	TRUE	Agmatinase, mitochondrial OS=Mus musculus OX=10090 GN=Agmat PE=1 SV=1	47	12	104	12	77.877	331.45	12	38.2	2.27827e+07	3.92583e+07	1.77271e+07	1.77271e+07	3.79331e+07	7.23411e+07	6.74084e+07	1.20357e+07	2.21869e+07	1.3697e+08	4.74587e+07	1.83723e+07	2.94861e+07	10	10	8	12	12	12	9	10	12	12	10	11	10	10	8	12	12	12	9	10	12	12	10	11
Q9CR86	52502	Carhsp1	FALSE	Calcium-regulated heat stable protein 1 OS=Mus musculus OX=10090 GN=Carhsp1 PE=1 SV=1	73	6	103	6	25.52	320.24	6	16.1	2.94074e+07	4.43183e+07	3.71637e+07	3.71637e+07	33904027	3.70588e+07	3.62711e+07	33847881	3.9849e+07	5.14561e+07	4.83134e+07	3.89671e+07	4.79603e+07	6	6	6	6	6	6	6	6	6	6	6	6	6	6	6	6	6	6	6	6	6	6	6	6
Q6P542	224742	Abcf1	FALSE	ATP-binding cassette sub-family F member 1 OS=Mus musculus OX=10090 GN=Abcf1 PE=1 SV=1	14	11	103	11	37.722	241.77	11	94.9	3.77787e+06	1.57921e+07	6.82154e+06	6.82154e+06	5.10988e+06	8.71633e+06	4.77964e+06	8.87596e+06	8.87752e+06	4.79728e+06	5.36025e+06	9.30082e+06	6.51816e+06	7	10	10	7	9	8	8	9	7	7	9	7	7	10	10	7	9	8	8	9	7	7	9	7
P19973	16985	Lsp1	FALSE	Lymphocyte-specific protein 1 OS=Mus musculus OX=10090 GN=Lsp1 PE=1 SV=2	43	10	103	10	45.305	299.01	10	36.7	3.53792e+06	5.40621e+06	4.83977e+06	4.83977e+06	5.43749e+06	5.50121e+06	3.2051e+06	4.48779e+06	9.33966e+06	4.64719e+06	4.53692e+06	7.30487e+06	1.27203e+07	9	10	8	10	10	8	8	10	9	9	9	10	9	10	8	10	10	8	8	10	9	9	9	10
P70403	13047	Cux1	FALSE	Protein CASP OS=Mus musculus OX=10090 GN=Cux1 PE=1 SV=2	29	15	103	5	65.28	223.41	15	77.2	6.16618e+06	9.16362e+06	9.04727e+06	9.04727e+06	4.75559e+06	6.47488e+06	3.73294e+06	5.7896e+06	7.62435e+06	8.49985e+06	5.9253e+06	5.58306e+06	5.63498e+06	15	15	14	14	15	15	15	15	15	15	14	15	5	5	5	5	5	5	5	5	5	5	4	5
Q9QYI5	56812	Dnajb2	FALSE	DnaJ homolog subfamily B member 2 OS=Mus musculus OX=10090 GN=Dnajb2 PE=1 SV=3	41	10	103	9	38.287	298.77	10	35.6	8.18815e+06	13659553	1.16684e+07	1.16684e+07	8.11711e+06	1.08194e+07	8.34215e+06	8.42581e+06	8.53835e+06	1.08557e+07	8.16897e+06	9.07955e+06	8.78748e+06	9	9	10	9	9	9	10	9	10	9	9	9	8	8	9	8	8	8	9	8	9	8	8	8
O55042	20617	Snca	FALSE	Alpha-synuclein OS=Mus musculus OX=10090 GN=Snca PE=1 SV=2	56	7	103	7	45.794	361.93	7	14.5	1.25945e+07	43047638	5.63864e+07	5.63864e+07	2.58528e+07	3.9232e+07	2.36612e+07	3.00569e+07	3.31294e+07	2.76494e+07	2.96487e+07	3.53613e+07	3.39834e+07	7	7	7	7	7	7	7	7	7	7	7	7	7	7	7	7	7	7	7	7	7	7	7	7
Q91WG2	70314	Rabep2	FALSE	Rab GTPase-binding effector protein 2 OS=Mus musculus OX=10090 GN=Rabep2 PE=1 SV=3	34	17	103	17	61.641	274.9	17	62.1	7.27745e+06	9.94326e+06	7.97226e+06	7.97226e+06	6.63901e+06	6.22715e+06	6.00802e+06	9.27104e+06	8.38312e+06	9.03276e+06	6.38237e+06	8.18188e+06	8.82664e+06	13	14	13	13	11	13	14	16	14	14	13	14	13	14	13	13	11	13	14	16	14	14	13	14
Q91YJ3	77862	Thyn1	FALSE	Thymocyte nuclear protein 1 OS=Mus musculus OX=10090 GN=Thyn1 PE=1 SV=1	42	11	103	11	41.208	200.52	11	26.2	5.65353e+06	1.17974e+07	6.15021e+06	6.15021e+06	5.8012e+06	1.02365e+07	7.42386e+06	5.07389e+06	5.54754e+06	1.11342e+07	9.84082e+06	5.20867e+06	7.17641e+06	11	11	9	11	10	11	11	11	11	11	10	10	11	11	9	11	10	11	11	11	11	11	10	10
Q8CHP5	78428	Pym1	FALSE	Partner of Y14 and mago OS=Mus musculus OX=10090 GN=Pym1 PE=1 SV=2	56	6	103	6	30.36	317.18	6	22.7	2.46177e+07	4.68541e+07	4.1904e+07	4.1904e+07	2.89041e+07	2.89582e+07	2.30576e+07	4.33626e+07	4.35545e+07	3.28913e+07	2.97062e+07	4.18818e+07	3.72551e+07	6	6	6	6	5	6	6	6	6	6	6	6	6	6	6	6	5	6	6	6	6	6	6	6
P11835	16414	Itgb2	FALSE	Integrin beta-2 OS=Mus musculus OX=10090 GN=Itgb2 PE=1 SV=2	15	9	103	9	37.613	288.16	9	85	4.90315e+06	6.14977e+06	4.96264e+06	4.96264e+06	5.81672e+06	1.00024e+07	5.48445e+06	3.04791e+06	8.24172e+06	7.53142e+06	6.79976e+06	3.90071e+06	9.71112e+06	9	7	8	9	8	9	8	9	9	9	8	9	9	7	8	9	8	9	8	9	9	9	8	9
Q9Z0R4	16443	Itsn1	FALSE	Intersectin-1 OS=Mus musculus OX=10090 GN=Itsn1 PE=1 SV=2	13	16	102	16	60.833	267.62	16	194.2	3.71131e+06	8.2868e+06	3.0593e+06	3.0593e+06	4.39195e+06	9.00844e+06	4.73729e+06	3.44303e+06	3.16929e+06	3.34875e+06	5.7268e+06	4.10018e+06	4.6898e+06	11	11	9	11	11	13	10	10	8	16	10	10	11	11	9	11	11	13	10	10	8	16	10	10
Q9WVB0	19663	Rbpms	FALSE	RNA-binding protein with multiple splicing OS=Mus musculus OX=10090 GN=Rbpms PE=1 SV=2	47	8	102	6	40.712	292.01	8	21.8	1.45818e+07	3.42907e+07	2.14001e+07	2.14001e+07	1.38795e+07	2.78389e+07	1.38481e+07	1.52049e+07	1.41709e+07	2.9095e+07	1.62611e+07	1.29867e+07	1.6628e+07	8	8	8	8	8	8	7	8	8	7	7	8	6	6	6	6	6	6	6	6	6	6	6	6
P06537	14815	Nr3c1	FALSE	Glucocorticoid receptor OS=Mus musculus OX=10090 GN=Nr3c1 PE=1 SV=2	21	10	102	10	42.882	282.48	10	87.1	6.73908e+06	1.0078e+07	1.05803e+07	1.05803e+07	7.99312e+06	8.2613e+06	5.61334e+06	1.02087e+07	1.08983e+07	7.30796e+06	6.82372e+06	1.37149e+07	1.10413e+07	8	8	8	8	8	7	8	10	7	7	9	9	8	8	8	8	8	7	8	10	7	7	9	9
P29788	22370	Vtn	FALSE	Vitronectin OS=Mus musculus OX=10090 GN=Vtn PE=1 SV=2	33	10	102	10	46.713	295.56	10	54.8	1.19875e+07	1.19527e+07	9.84504e+06	9.84504e+06	8.2866e+06	1.03547e+07	8.5527e+06	7.27292e+06	1.22688e+07	1.63193e+07	1.21086e+07	8.38603e+06	1.01963e+07	10	9	9	9	9	10	10	10	10	10	9	10	10	9	9	9	9	10	10	10	10	10	9	10
P01887	12010	B2m	FALSE	Beta-2-microglobulin OS=Mus musculus OX=10090 GN=B2m PE=1 SV=2	23	3	102	3	21.404	228.18	3	13.8	1.31505e+07	2.44214e+07	1.72312e+07	1.72312e+07	1.98415e+07	3.78021e+07	2.41687e+07	1.00135e+07	2.71372e+07	3.74083e+07	2.39098e+07	1.09936e+07	2.44131e+07	3	3	3	3	3	3	3	3	3	3	3	3	3	3	3	3	3	3	3	3	3	3	3	3
Q80XU3	98415	Nucks1	FALSE	Nuclear ubiquitous casein and cyclin-dependent kinase substrate 1 OS=Mus musculus OX=10090 GN=Nucks1 PE=1 SV=1	44	10	102	10	51.705	293.76	10	26.3	1.71708e+07	5.06892e+07	5.29808e+07	5.29808e+07	2.97242e+07	2.937e+07	2.50898e+07	4.69789e+07	4.86839e+07	3.47737e+07	2.63813e+07	4.77884e+07	3.75827e+07	7	8	9	9	7	9	10	7	7	6	10	8	7	8	9	9	7	9	10	7	7	6	10	8
Q62422	20409	Ostf1	FALSE	Osteoclast-stimulating factor 1 OS=Mus musculus OX=10090 GN=Ostf1 PE=1 SV=2	47	8	102	8	32.619	271.75	8	23.8	2.81872e+07	5.12443e+07	3.11395e+07	3.11395e+07	3.42066e+07	4.6309e+07	3.34363e+07	2.8619e+07	3.91563e+07	5.57801e+07	4.52787e+07	2.98972e+07	4.49209e+07	8	8	8	8	8	8	8	8	8	8	8	8	8	8	8	8	8	8	8	8	8	8	8	8
Q8BL97	225027	Srsf7	FALSE	Serine/arginine-rich splicing factor 7 OS=Mus musculus OX=10090 GN=Srsf7 PE=1 SV=1	28	8	101	7	29.379	236.7	8	30.8	5.49218e+07	7.87684e+07	5.77231e+07	5.77231e+07	3.35703e+07	6.68878e+07	4.35984e+07	4.66506e+07	5.63682e+07	8.7113e+07	5.50161e+07	2.8716e+07	3.08123e+07	8	8	8	8	8	8	7	8	8	8	6	5	7	7	7	7	7	7	6	7	7	7	5	4
Q9R0I7	56531	Ylpm1	FALSE	YLP motif-containing protein 1 OS=Mus musculus OX=10090 GN=Ylpm1 PE=2 SV=2	14	14	101	14	63.594	267.22	14	155	3.25952e+06	7.51885e+06	5.45167e+06	5.45167e+06	3.93367e+06	5.60089e+06	3.42094e+06	4.25309e+06	4.16514e+06	3.69864e+06	4.61047e+06	3.17096e+06	4.77146e+06	11	13	11	11	13	13	13	12	12	12	12	13	11	13	11	11	13	13	13	12	12	12	12	13
Q60932	22333	Vdac1	TRUE	Voltage-dependent anion-selective channel protein 1 OS=Mus musculus OX=10090 GN=Vdac1 PE=1 SV=3	46	9	101	8	37.369	251.62	9	32.3	6.56247e+06	1.43875e+07	1.09151e+07	1.09151e+07	1.23148e+07	2.96099e+07	1.89183e+07	1.31908e+07	1.07229e+07	3.16359e+07	2.67855e+07	1.95808e+07	1.99982e+07	6	6	7	8	8	8	8	6	7	9	7	8	5	5	6	7	7	7	7	5	6	8	6	7
Q9D8T7	380773	Slirp	TRUE	SRA stem-loop-interacting RNA-binding protein, mitochondrial OS=Mus musculus OX=10090 GN=Slirp PE=1 SV=2	79	8	101	8	41.573	284.76	8	12.6	3.55708e+07	5.84674e+07	3.90624e+07	3.90624e+07	2.68333e+07	4.59897e+07	2.76105e+07	5.21379e+07	48201181	7.98573e+07	4.707e+07	4.51969e+07	4.23826e+07	8	8	8	8	7	8	8	8	8	8	8	8	8	8	8	8	7	8	8	8	8	8	8	8
Q9CT10	71810	Ranbp3	FALSE	Ran-binding protein 3 OS=Mus musculus OX=10090 GN=Ranbp3 PE=1 SV=2	22	7	101	7	44.055	299.79	7	52.5	3.93804e+06	8.90138e+06	6.82008e+06	6.82008e+06	5.07294e+06	7.24652e+06	4.7e+06	5.7011e+06	7.63504e+06	5.44522e+06	5.15996e+06	8.0407e+06	6.92862e+06	7	7	7	7	7	7	7	7	7	7	7	7	7	7	7	7	7	7	7	7	7	7	7	7
P05213	22143	Tuba1b	FALSE	Tubulin alpha-1B chain OS=Mus musculus OX=10090 GN=Tuba1b PE=1 SV=2	42	13	101	4	57.12	291.02	13	50.1	1.74193e+07	3.63936e+07	1.00018e+07	1.00018e+07	1.92868e+07	4.24735e+07	2.93756e+07	1.48191e+07	1.39695e+07	3.02459e+07	3.15738e+07	1.59947e+07	1.75572e+07	11	12	6	13	13	13	9	8	12	13	8	10	4	4	2	4	4	4	4	2	4	4	3	4
P62259	22627	Ywhae	FALSE	14-3-3 protein epsilon OS=Mus musculus OX=10090 GN=Ywhae PE=1 SV=1	34	9	101	6	34.235	253.46	9	29.2	1.09511e+06	1.8237e+06	906147	906147	2.2642e+06	4.618e+06	3.46976e+06	120383	132527	4.31737e+06	3165448	803372	1.2152e+06	7	7	6	8	9	9	4	4	8	9	4	7	4	4	3	5	6	6	1	1	5	6	1	4
Q9CZL5	72562	Pcbd2	TRUE	Pterin-4-alpha-carbinolamine dehydratase 2 OS=Mus musculus OX=10090 GN=Pcbd2 PE=1 SV=2	47	6	101	6	30.509	255.8	6	14.8	3.62604e+07	5.145e+07	3.1093e+07	3.1093e+07	4.12729e+07	5.81759e+07	4.52079e+07	3.73705e+07	3.7244e+07	7.51887e+07	6.04213e+07	4.40773e+07	5.09458e+07	6	6	6	6	6	6	6	6	6	6	6	6	6	6	6	6	6	6	6	6	6	6	6	6
Q5SV85	217030	Synrg	FALSE	Synergin gamma OS=Mus musculus OX=10090 GN=Synrg PE=1 SV=1	22	20	100	20	75.845	254.88	20	139.5	4.32931e+06	7.53152e+06	5.63576e+06	5.63576e+06	5.2393e+06	7.27483e+06	4.23186e+06	6.60612e+06	7.23186e+06	4.75448e+06	4.80778e+06	9.1818e+06	7.11058e+06	13	16	15	18	17	16	16	17	11	13	17	16	13	16	15	18	17	16	16	17	11	13	17	16
P52792	103988	Gck	FALSE	Hexokinase-4 OS=Mus musculus OX=10090 GN=Gck PE=1 SV=1	48	18	100	18	64.906	270.26	18	52.1	6.15387e+06	9.76566e+06	725301	725301	6.3108e+06	1.45466e+07	1.37211e+07	649716	540282	3.62301e+07	1.30623e+07	468961	4.43359e+06	14	15	4	15	15	16	5	3	18	16	4	11	14	15	4	15	15	16	5	3	18	16	4	11
Q9D7P6	66383	Iscu	TRUE	Iron-sulfur cluster assembly enzyme ISCU, mitochondrial OS=Mus musculus OX=10090 GN=Iscu PE=1 SV=1	49	8	100	8	42.967	259.81	8	18.1	1.52479e+07	2.04797e+07	2.08284e+07	2.08284e+07	1.64396e+07	2.17907e+07	1.31047e+07	1.95712e+07	2.22933e+07	3.69057e+07	2.04752e+07	2.13516e+07	1.87745e+07	7	7	7	7	7	7	8	8	8	8	8	7	7	7	7	7	7	7	8	8	8	8	8	7
O08997	11927	Atox1	FALSE	Copper transport protein ATOX1 OS=Mus musculus OX=10090 GN=Atox1 PE=1 SV=1	100	9	100	9	56.485	363.7	9	7.3	1.34828e+08	3.06486e+08	2.06369e+08	2.06369e+08	1.14573e+08	2.26072e+08	9.76033e+07	1.59098e+08	2.06985e+08	2.56274e+08	1.83755e+08	3.07549e+08	1.50786e+08	7	8	6	7	7	6	7	9	9	9	9	7	7	8	6	7	7	6	7	9	9	9	9	7
Q9CQU0	66073	Txndc12	FALSE	Thioredoxin domain-containing protein 12 OS=Mus musculus OX=10090 GN=Txndc12 PE=1 SV=1	54	5	100	5	36.151	302.36	5	19	2.45988e+07	4.47465e+07	3.0695e+07	3.0695e+07	2.79467e+07	3.24177e+07	2.83993e+07	2.08267e+07	2.58442e+07	5.1394e+07	3.55817e+07	2.11529e+07	3.48652e+07	5	4	4	4	4	4	4	4	4	5	4	4	5	4	4	4	4	4	4	4	4	5	4	4
Q80U78	80912	Pum1	FALSE	Pumilio homolog 1 OS=Mus musculus OX=10090 GN=Pum1 PE=1 SV=2	10	8	100	8	53.203	279.63	8	126.5	4.03943e+06	6.79389e+06	5.87067e+06	5.87067e+06	3.7625e+06	4.50385e+06	2.94861e+06	6.57821e+06	5.87669e+06	2.37277e+06	3.7139e+06	7.66016e+06	5.23076e+06	8	8	7	8	7	7	8	8	5	8	8	8	8	8	7	8	7	7	8	8	5	8	8	8
Q9JM14	50773	Nt5c	FALSE	5'(3')-deoxyribonucleotidase, cytosolic type OS=Mus musculus OX=10090 GN=Nt5c PE=1 SV=1	60	8	100	8	51.137	314.88	8	23.1	1.28226e+07	1.78388e+07	4.98567e+06	4.98567e+06	1.22643e+07	2.27117e+07	2.0227e+07	4.20627e+06	5.04156e+06	3.80551e+07	2.47168e+07	3.7685e+06	1.24614e+07	8	7	6	8	8	8	8	6	8	8	7	8	8	7	6	8	8	8	8	6	8	8	7	8
P07901	15519	Hsp90aa1	FALSE	Heat shock protein HSP 90-alpha OS=Mus musculus OX=10090 GN=Hsp90aa1 PE=1 SV=4	22	12	99	7	65.4	295.84	12	84.7	3.74684e+06	9.76653e+06	5.68708e+06	5.68708e+06	4.59515e+06	6.12127e+06	4.407e+06	7.16111e+06	5.11113e+06	3.35095e+06	5.16876e+06	8.00726e+06	4.03195e+06	9	12	11	11	11	11	12	11	10	11	11	11	5	7	7	6	6	6	7	6	5	6	7	6
P56528	12494	Cd38	FALSE	ADP-ribosyl cyclase/cyclic ADP-ribose hydrolase 1 OS=Mus musculus OX=10090 GN=Cd38 PE=1 SV=2	42	9	99	9	59.012	263.73	9	34.4	1.7466e+07	1.8685e+07	1.6572e+07	1.6572e+07	1.68246e+07	3.17071e+07	1.58453e+07	1.19097e+07	1.31788e+07	2.60775e+07	2.67924e+07	1.40984e+07	2.23531e+07	9	8	8	9	8	8	8	9	9	9	9	8	9	8	8	9	8	8	8	9	9	9	9	8
Q99JX3	70231	Gorasp2	FALSE	Golgi reassembly-stacking protein 2 OS=Mus musculus OX=10090 GN=Gorasp2 PE=1 SV=3	31	10	99	9	43.584	268.61	10	47	1.44357e+07	2.29251e+07	1.4396e+07	1.4396e+07	1.19345e+07	1.7237e+07	1.06896e+07	1.23658e+07	1.51856e+07	2.20596e+07	1.50912e+07	1.12834e+07	1.37599e+07	10	10	8	10	9	10	8	10	10	10	9	9	9	9	7	9	8	9	7	9	9	9	8	8
P35505	14085	Fah	FALSE	Fumarylacetoacetase OS=Mus musculus OX=10090 GN=Fah PE=1 SV=2	41	10	99	10	43.533	301.75	10	46.1	1.24982e+07	2.54363e+07	2.19488e+07	2.19488e+07	1.60634e+07	2.51057e+07	1.79518e+07	1.86843e+07	1.84416e+07	1.92163e+07	1.7792e+07	2.55618e+07	2.09834e+07	8	8	10	9	10	10	10	10	9	9	10	10	8	8	10	9	10	10	10	10	9	9	10	10
P17095	15361	Hmga1	FALSE	High mobility group protein HMG-I/HMG-Y OS=Mus musculus OX=10090 GN=Hmga1 PE=1 SV=4	56	6	99	6	25.701	279.43	6	11.6	1.44106e+07	3.98799e+07	3.29493e+07	3.29493e+07	2.78409e+07	3.31376e+07	2.20156e+07	2.77396e+07	3.27324e+07	2.69407e+07	2.73687e+07	2.94054e+07	3.56759e+07	6	6	6	6	6	6	6	6	6	6	6	6	6	6	6	6	6	6	6	6	6	6	6	6
P11438	16783	Lamp1	FALSE	Lysosome-associated membrane glycoprotein 1 OS=Mus musculus OX=10090 GN=Lamp1 PE=1 SV=2	16	5	99	5	32.459	289.04	5	43.8	1.76931e+07	2.07762e+07	2.20741e+07	2.20741e+07	2.10889e+07	2.13903e+07	1.32392e+07	1.97537e+07	2.81421e+07	2.86251e+07	2.0182e+07	1.76717e+07	2.60742e+07	4	4	4	4	5	5	4	5	4	5	4	4	4	4	4	4	5	5	4	5	4	5	4	4
Q61081	12539	Cdc37	FALSE	Hsp90 co-chaperone Cdc37 OS=Mus musculus OX=10090 GN=Cdc37 PE=1 SV=1	42	14	99	14	61.848	256.68	14	44.6	6.2047e+06	9.79547e+06	3.76273e+06	3.76273e+06	6.97782e+06	1.19487e+07	1.04168e+07	3.15797e+06	3.84362e+06	1.34633e+07	9.56616e+06	3.33828e+06	5.30247e+06	12	11	9	13	13	13	8	8	13	13	7	11	12	11	9	13	13	13	8	8	13	13	7	11
P08101	14130	Fcgr2b	FALSE	Low affinity immunoglobulin gamma Fc region receptor II OS=Mus musculus OX=10090 GN=Fcgr2 PE=1 SV=2	22	6	99	4	26.986	293.99	6	36.7	1.49438e+07	2.07735e+07	2.34464e+07	2.34464e+07	2.25502e+07	2.12396e+07	1.22628e+07	1.49652e+07	2.53715e+07	2.00042e+07	1.81493e+07	2.95063e+07	2.91771e+07	6	6	6	6	6	6	6	6	6	6	6	6	4	4	4	4	4	4	4	4	4	4	4	4
Q8BRV5	243219	2900026A02Rik	FALSE	Uncharacterized protein KIAA1671 OS=Mus musculus OX=10090 GN=Kiaa1671 PE=2 SV=1	38	10	99	10	50.884	223.34	10	34.6	4.35306e+06	7.02982e+06	7.63048e+06	7.63048e+06	4.44284e+06	4.25929e+06	3.63489e+06	7.46983e+06	6.4087e+06	5.82125e+06	3.81357e+06	5.73943e+06	6.36352e+06	8	9	9	8	8	8	9	9	8	8	8	9	8	9	9	8	8	8	9	9	8	8	8	9
P11031	20024	Sub1	FALSE	Activated RNA polymerase II transcriptional coactivator p15 OS=Mus musculus OX=10090 GN=Sub1 PE=1 SV=3	45	6	98	6	40.707	252.87	6	14.4	1.40394e+07	2.14362e+07	1.11857e+07	1.11857e+07	1.54419e+07	2.80996e+07	1.89733e+07	1.07218e+07	1.42178e+07	28836040	2.4405e+07	8.26105e+06	1.27635e+07	6	6	6	6	6	6	6	6	6	6	6	6	6	6	6	6	6	6	6	6	6	6	6	6
P52293	16647	Kpna2	FALSE	Importin subunit alpha-1 OS=Mus musculus OX=10090 GN=Kpna2 PE=1 SV=2	32	12	98	12	53.247	291.32	12	57.9	4.58627e+06	6.81697e+06	3.48419e+06	3.48419e+06	5.83239e+06	7.39055e+06	5.7869e+06	2.33411e+06	2.93002e+06	7.52249e+06	8.43841e+06	2.55834e+06	5.41187e+06	10	10	8	10	11	10	8	8	11	11	9	11	10	10	8	10	11	10	8	8	11	11	9	11
Q9CQ22	66508	Lamtor1	FALSE	Ragulator complex protein LAMTOR1 OS=Mus musculus OX=10090 GN=Lamtor1 PE=1 SV=1	65	7	98	7	40.993	326.67	7	17.7	8.92518e+06	1.8524e+07	3.73745e+06	3.73745e+06	1.00425e+07	1.64161e+07	1.05246e+07	5.64196e+06	7.09291e+06	2.15893e+07	15139739	8.04967e+06	1.27832e+07	7	7	6	7	7	7	6	7	7	7	6	7	7	7	6	7	7	7	6	7	7	7	6	7
Q8C9B9	23856	Dido1	FALSE	Death-inducer obliterator 1 OS=Mus musculus OX=10090 GN=Dido1 PE=1 SV=4	11	16	98	16	61.635	289.81	16	247	3.16058e+06	7.76269e+06	5.01858e+06	5.01858e+06	5.00169e+06	6.91825e+06	4.06002e+06	5.88153e+06	6.10188e+06	5.25188e+06	4.2676e+06	7.36286e+06	7.28667e+06	11	11	12	11	14	12	14	13	10	11	14	13	11	11	12	11	14	12	14	13	10	11	14	13
O88522	16151	Ikbkg	FALSE	NF-kappa-B essential modulator OS=Mus musculus OX=10090 GN=Ikbkg PE=1 SV=2	36	11	98	11	46.985	293.61	11	47.9	6.23837e+06	1.01069e+07	1.5178e+07	1.5178e+07	5.07873e+06	6.91821e+06	4.50697e+06	1.0078e+07	1.0127e+07	8.55588e+06	6.25861e+06	1.16503e+07	8.8905e+06	9	9	9	9	7	7	9	10	8	7	9	7	9	9	9	9	7	7	9	10	8	7	9	7
Q61559	14132	Fcgrt	FALSE	IgG receptor FcRn large subunit p51 OS=Mus musculus OX=10090 GN=Fcgrt PE=1 SV=1	23	8	98	8	46.806	280.25	8	40.1	2.75278e+07	4.89747e+07	5.47247e+07	5.47247e+07	2.94437e+07	5.12773e+07	2.365e+07	4.01598e+07	4.50244e+07	5.50257e+07	4.5303e+07	4.38545e+07	4.47582e+07	7	7	8	8	8	8	7	8	7	8	8	8	7	7	8	8	8	8	7	8	7	8	8	8
P01898	15007	H2-Q10	FALSE	H-2 class I histocompatibility antigen, Q10 alpha chain OS=Mus musculus OX=10090 GN=H2-Q10 PE=1 SV=3	26	7	97	3	34.134	278.3	7	37.2	893619	1.14454e+06	164915	164915	336056	1.61121e+06	1.3496e+06	143411	186589	1.40715e+06	1.26057e+06		120927	6	7	4	5	7	7	5	5	7	7	3	4	3	3	1	2	3	3	2	2	3	3	0	1
Q9CQ69	22272	Uqcrq	TRUE	Cytochrome b-c1 complex subunit 8 OS=Mus musculus OX=10090 GN=Uqcrq PE=1 SV=3	46	5	97	5	24.063	203.02	5	9.8	1.08307e+07	1.81116e+07	9.47536e+06	9.47536e+06	1.08289e+07	1.90895e+07	1.60038e+07	8.69183e+06	1.09665e+07	4.28991e+07	1.90712e+07	7.66533e+06	1.21222e+07	5	5	5	5	5	5	5	5	5	5	5	5	5	5	5	5	5	5	5	5	5	5	5	5
Q8CH02	70616	Sugp1	FALSE	SURP and G-patch domain-containing protein 1 OS=Mus musculus OX=10090 GN=Sugp1 PE=1 SV=1	22	9	97	9	39.296	292.8	9	72.6	1.74356e+06	3.65412e+06	2.84609e+06	2.84609e+06	2.06388e+06	3.3723e+06	1.94858e+06	2.28467e+06	2.08115e+06	2.73587e+06	2.61986e+06	3.32004e+06	2.72203e+06	7	7	7	6	7	7	7	7	7	8	8	7	7	7	7	6	7	7	7	7	7	8	8	7
Q99J36	233802	Thumpd1	FALSE	THUMP domain-containing protein 1 OS=Mus musculus OX=10090 GN=Thumpd1 PE=1 SV=1	28	9	97	9	35.97	254.14	9	38.9	6.53977e+06	7.9186e+06	6.14512e+06	6.14512e+06	6.30037e+06	1.07748e+07	6.60152e+06	4.94544e+06	5.65371e+06	1.06992e+07	8.63955e+06	4.30842e+06	7.76797e+06	8	8	9	9	8	9	9	9	9	9	9	9	8	8	9	9	8	9	9	9	9	9	9	9
Q80U72	105782	Scrib	FALSE	Protein scribble homolog OS=Mus musculus OX=10090 GN=Scrib PE=1 SV=2	17	18	97	18	70.978	252.42	18	174	7.52524e+06	1.5117e+07	8.8857e+06	8.8857e+06	7.67879e+06	1.38734e+07	8.20683e+06	8.04605e+06	8.38455e+06	1.14287e+07	1.14199e+07	8.08406e+06	8.79845e+06	14	13	11	14	16	14	13	14	13	15	12	12	14	13	11	14	16	14	13	14	13	15	12	12
Q9JMH9	360013	Myo18a	FALSE	Unconventional myosin-XVIIIa OS=Mus musculus OX=10090 GN=Myo18a PE=1 SV=2	10	15	97	15	69.404	232.14	15	232.6	3.882e+06	9.5762e+06	7.82008e+06	7.82008e+06	7333806	1.13038e+07	6.25585e+06	9.23353e+06	8.37527e+06	3.27965e+06	7.3825e+06	1.31743e+07	1.02929e+07	9	10	11	12	12	12	12	10	5	11	13	12	9	10	11	12	12	12	12	10	5	11	13	12
O55013	27096	Trappc3	FALSE	Trafficking protein particle complex subunit 3 OS=Mus musculus OX=10090 GN=Trappc3 PE=1 SV=1	41	8	96	8	25.32	224.84	8	20.3	9.40744e+06	1.85985e+07	5314092	5314092	1.21613e+07	1.56993e+07	1.37656e+07	5.63978e+06	6.49913e+06	2.41184e+07	1.6371e+07	3.10539e+06	1.13018e+07	8	8	6	8	8	8	8	8	8	8	8	8	8	8	6	8	8	8	8	8	8	8	8	8
Q7TNE3	216873	Spag7	FALSE	Sperm-associated antigen 7 OS=Mus musculus OX=10090 GN=Spag7 PE=1 SV=1	42	7	96	7	46.713	329.25	7	25.9	4.28682e+06	8.0808e+06	8.46206e+06	8.46206e+06	7.3906e+06	8.25694e+06	5.64116e+06	7.46656e+06	8.44651e+06	7.6281e+06	7.63186e+06	1.10712e+07	1.01157e+07	7	7	5	7	7	6	7	7	7	7	7	7	7	7	5	7	7	6	7	7	7	7	7	7
P00920	12349	Car2	FALSE	Carbonic anhydrase 2 OS=Mus musculus OX=10090 GN=Ca2 PE=1 SV=4	59	10	96	10	53.188	280.34	10	29	4.92429e+06	6.40527e+06	6.79685e+06	6.79685e+06	1.12881e+07	2.39832e+07	1.30373e+07	3.48923e+06	4.98604e+06	1.31817e+07	1.49404e+07	1.34657e+06	7.41411e+06	8	10	9	10	10	10	7	9	10	9	6	9	8	10	9	10	10	10	7	9	10	9	6	9
Q62095	26900	Ddx3y	FALSE	ATP-dependent RNA helicase DDX3Y OS=Mus musculus OX=10090 GN=Ddx3y PE=1 SV=2	24	13	96	4	59.102	191.18	13	73.4	4.67382e+06	1.02034e+07	2.89824e+06	2.89824e+06				6.45964e+06	7.76923e+06	2.23319e+06				12	13	11	6	7	7	11	12	11	7	8	7	4	4	3	0	0	0	4	4	4	0	0	0
P59759	239719	Mrtfb	FALSE	Myocardin-related transcription factor B OS=Mus musculus OX=10090 GN=Mrtfb PE=1 SV=1	27	18	96	18	70.793	268.16	18	117.5	6.91243e+06	1.19846e+07	1.28763e+07	1.28763e+07	7.07056e+06	5.91007e+06	4.34678e+06	1.06847e+07	1.11738e+07	7.8166e+06	5.79304e+06	1.17081e+07	9.53362e+06	13	15	17	14	9	10	17	17	15	10	16	14	13	15	17	14	9	10	17	17	15	10	16	14
Q91WP6	20716	Serpina3n	FALSE	Serine protease inhibitor A3N OS=Mus musculus OX=10090 GN=Serpina3n PE=1 SV=1	21	7	96	5	32.262	291.25	7	46.7	1.50111e+06	3.33294e+06	3.3284e+06	3.3284e+06	1.73057e+06	6.09459e+06	2.55774e+06	1.57623e+06	2.02616e+06	3.86148e+06	3.6895e+06	2.05668e+06	1.96118e+06	6	6	6	6	7	6	7	7	7	7	6	6	4	4	4	4	5	4	5	5	5	5	4	4
Q6ZWZ2	67615	Ube2r2	FALSE	Ubiquitin-conjugating enzyme E2 R2 OS=Mus musculus OX=10090 GN=Ube2r2 PE=1 SV=1	37	8	96	7	33.366	222.66	8	27.1	7.36877e+06	1.13268e+07	8.15064e+06	8.15064e+06	7.34528e+06	9.7134e+06	6.99831e+06	6.10998e+06	7.62117e+06	1.12499e+07	1.1335e+07	5.80311e+06	8.61237e+06	8	8	8	8	8	8	8	8	8	8	8	8	7	7	7	7	7	7	7	7	7	7	7	7
P18828	20969	Sdc1	FALSE	Syndecan-1 OS=Mus musculus OX=10090 GN=Sdc1 PE=1 SV=1	18	7	96	7	41.807	290.32	7	32.9	1.16335e+07	1.84132e+07	2.52882e+07	2.52882e+07	1.52072e+07	1.98786e+07	9.47128e+06	1.43907e+07	1.40812e+07	1.77252e+07	1.57322e+07	2.30209e+07	1.6066e+07	6	6	7	6	7	6	7	6	6	6	7	6	6	6	7	6	7	6	7	6	6	6	7	6
P70670	17938	Naca	FALSE	Nascent polypeptide-associated complex subunit alpha, muscle-specific form OS=Mus musculus OX=10090 GN=Naca PE=1 SV=2	3	5	95	5	36.982	279.36	5	220.4	2.45155e+07	4.49557e+07	3.1483e+07	3.1483e+07	2.61048e+07	4.23063e+07	2.59374e+07	2.48425e+07	2.49725e+07	4.23768e+07	3.2951e+07	2.32999e+07	2.7388e+07	5	5	5	5	5	5	5	5	5	5	5	5	5	5	5	5	5	5	5	5	5	5	5	5
E9Q1P8	270110	Irf2bp2	FALSE	Interferon regulatory factor 2-binding protein 2 OS=Mus musculus OX=10090 GN=Irf2bp2 PE=1 SV=1	34	12	95	11	56.905	336.46	12	59.3	2.98956e+06	7.25569e+06	6.93864e+06	6.93864e+06	4.76862e+06	7.99281e+06	5.00162e+06	5.18195e+06	7.30901e+06	4.56867e+06	5.79397e+06	6.94146e+06	8.04139e+06	8	10	9	9	11	11	9	11	9	11	11	11	8	10	9	8	10	10	9	10	9	11	10	10
Q9D898	74192	Arpc5l	FALSE	Actin-related protein 2/3 complex subunit 5-like protein OS=Mus musculus OX=10090 GN=Arpc5l PE=1 SV=1	59	9	95	9	46.936	281.66	9	17	2.37239e+07	4.61994e+07	3.5407e+07	3.5407e+07	2.1838e+07	3.74638e+07	2.39956e+07	2.92856e+07	3.14861e+07	4.376e+07	3.56243e+07	3.18674e+07	3.12774e+07	8	8	7	8	8	8	9	8	8	9	9	8	8	8	7	8	8	8	9	8	8	9	9	8
Q9D735	68544	Trir	FALSE	Telomerase RNA component interacting RNase OS=Mus musculus OX=10090 GN=Trir PE=1 SV=1	39	8	95	8	38.63	270.31	8	18.4	4.60595e+06	1.20785e+07	1.7694e+07	1.7694e+07	9.31087e+06	1.3876e+07	8.39665e+06	1.04386e+07	1.28369e+07	1.24295e+07	1.09816e+07	1.1343e+07	1.2975e+07	7	7	8	7	7	7	7	7	7	7	7	7	7	7	8	7	7	7	7	7	7	7	7	7
P19639	14864	Gstm3	FALSE	Glutathione S-transferase Mu 3 OS=Mus musculus OX=10090 GN=Gstm3 PE=1 SV=2	34	8	95	1	39.059	243.94	8	25.7	251332	451888	189385	189385	326619	468302	414997	133956	184045	843708	491395	92954.1	219972	6	6	6	7	7	7	6	7	8	7	6	7	0	0	0	0	0	0	0	0	1	0	0	0
P48771	12866	Cox7a2	TRUE	Cytochrome c oxidase subunit 7A2, mitochondrial OS=Mus musculus OX=10090 GN=Cox7a2 PE=1 SV=2	60	4	95	4	36.495	314.89	4	9.3	1.20499e+08	2.78707e+08	1.27405e+08	1.27405e+08	1.18048e+08	2.79719e+08	2.08177e+08	1.18316e+08	1.17888e+08	5.44997e+08	2.73691e+08	1.17501e+08	2.05062e+08	4	3	3	3	4	3	3	3	3	4	3	3	4	3	3	3	4	3	3	3	3	4	3	3
Q6P069	109552	Sri	FALSE	Sorcin OS=Mus musculus OX=10090 GN=Sri PE=1 SV=1	40	8	95	8	33.86	217.2	8	21.6	1.17829e+07	2.06624e+07	9.2629e+06	9.2629e+06	1.4353e+07	2.65999e+07	2.06041e+07	6.56731e+06	8.83631e+06	3.24198e+07	1.97952e+07	5.13429e+06	1.52646e+07	7	7	7	7	7	7	7	7	8	7	6	7	7	7	7	7	7	7	7	7	8	7	6	7
Q9CWK3	70233	Cd2bp2	FALSE	CD2 antigen cytoplasmic tail-binding protein 2 OS=Mus musculus OX=10090 GN=Cd2bp2 PE=1 SV=1	47	10	95	10	53.926	268.48	10	37.7	5.45415e+06	8.86986e+06	1.1145e+07	1.1145e+07	6.78486e+06	7.93689e+06	4.71047e+06	7.79533e+06	9.32216e+06	6.8321e+06	6.85897e+06	9.25854e+06	7.85418e+06	9	8	10	10	9	8	9	10	8	8	10	9	9	8	10	10	9	8	9	10	8	8	10	9
Q8K124	102595	Plekho2	FALSE	Pleckstrin homology domain-containing family O member 2 OS=Mus musculus OX=10090 GN=Plekho2 PE=1 SV=1	36	11	95	11	46.105	291.79	11	53.8	3.70931e+06	7.31705e+06	3.84998e+06	3.84998e+06	5.10455e+06	7.13907e+06	4.96486e+06	5.10588e+06	7.32257e+06	5.49427e+06	5.71767e+06	5.59391e+06	8.63053e+06	10	9	5	8	10	9	9	9	8	8	9	9	10	9	5	8	10	9	9	9	8	8	9	9
Q8C2Q3	56275	Rbm14	FALSE	RNA-binding protein 14 OS=Mus musculus OX=10090 GN=Rbm14 PE=1 SV=1	25	12	94	12	42.541	252.37	12	69.4	8.05165e+06	1.83325e+07	1.4527e+07	1.4527e+07	8.13889e+06	2.11251e+07	9.56658e+06	1.16265e+07	1.20298e+07	7.49109e+06	1.18004e+07	1.34974e+07	1.4654e+07	9	10	9	8	10	9	9	10	8	9	10	10	9	10	9	8	10	9	9	10	8	9	10	10
P13634	12346	Car1	FALSE	Carbonic anhydrase 1 OS=Mus musculus OX=10090 GN=Ca1 PE=1 SV=4	66	11	94	11	50.38	264.5	11	28.3	4.52156e+06	4.71435e+06	6.17003e+06	6.17003e+06	8.24378e+06	1.779e+07	1.00333e+07	1.99263e+06	3.71825e+06	1.16199e+07	1.03344e+07	805112	5.44421e+06	9	8	9	8	11	11	7	8	10	10	5	8	9	8	9	8	11	11	7	8	10	10	5	8
Q9QYC0	11518	Add1	FALSE	Alpha-adducin OS=Mus musculus OX=10090 GN=Add1 PE=1 SV=2	15	10	94	10	38.781	272.6	10	80.6	4.15699e+06	9.38232e+06	1.07221e+07	1.07221e+07	6.98974e+06	9.03569e+06	3.91214e+06	8.35061e+06	9.33194e+06	4.09101e+06	6.80502e+06	1.22917e+07	9.2892e+06	8	9	10	9	10	8	9	10	8	10	10	10	8	9	10	9	10	8	9	10	8	10	10	10
P10126	13627	Eef1a1	FALSE	Elongation factor 1-alpha 1 OS=Mus musculus OX=10090 GN=Eef1a1 PE=1 SV=3	23	7	94	7	30.204	271.46	7	50.1	1.14082e+07	2.29012e+07	1.04234e+07	1.04234e+07	1.20152e+07	2.13251e+07	1.28948e+07	1.27064e+07	1.11731e+07	1.47295e+07	1.37681e+07	1.28449e+07	1.18662e+07	6	6	6	6	6	7	6	6	6	6	6	6	6	6	6	6	6	7	6	6	6	6	6	6
Q9Z2U1	26442	Psma5	FALSE	Proteasome subunit alpha type-5 OS=Mus musculus OX=10090 GN=Psma5 PE=1 SV=1	61	11	94	11	62.204	291.04	11	26.4	2.01785e+07	3.61288e+07	7.62486e+06	7.62486e+06	2.61312e+07	5.40534e+07	4.69776e+07	6.40938e+06	9.05917e+06	6.38298e+07	4.71871e+07	7.05506e+06	1.99176e+07	9	9	6	10	10	11	9	9	11	10	8	9	9	9	6	10	10	11	9	9	11	10	8	9
Q9CZW5	28185	Tomm70a	TRUE	Mitochondrial import receptor subunit TOM70 OS=Mus musculus OX=10090 GN=Tomm70 PE=1 SV=2	32	15	94	15	65.988	213.3	15	67.5	3.69656e+06	7.07299e+06	4.26281e+06	4.26281e+06	5.46383e+06	1.33217e+07	1.00397e+07	4.22965e+06	4.69101e+06	2.62393e+07	9.42889e+06	5.26844e+06	5.63184e+06	9	11	9	9	14	13	9	9	15	13	8	10	9	11	9	9	14	13	9	9	15	13	8	10
Q9CPQ1	12864	Cox6c	TRUE	Cytochrome c oxidase subunit 6C OS=Mus musculus OX=10090 GN=Cox6c PE=1 SV=3	78	8	94	8	36.319	222.8	8	8.5	2.27414e+07	4.42707e+07	1.50596e+07	1.50596e+07	2.38909e+07	5.38784e+07	4.78087e+07	1.96784e+07	1.93966e+07	1.16527e+08	5.4117e+07	1.71139e+07	2.87699e+07	8	8	7	8	8	8	8	8	8	8	8	8	8	8	7	8	8	8	8	8	8	8	8	8
P28798	14824	Grn	FALSE	Progranulin OS=Mus musculus OX=10090 GN=Grn PE=1 SV=2	31	13	94	13	65.924	251.56	13	63.4	5.2509e+06	7.4868e+06	7.85883e+06	7.85883e+06	6.95742e+06	5.95752e+06	4.30656e+06	7.19412e+06	1.71065e+07	1.40866e+07	7.94157e+06	1.40508e+07	8.68965e+06	7	8	8	8	9	8	8	13	12	9	13	9	7	8	8	8	9	8	8	13	12	9	13	9
P10810	12475	Cd14	FALSE	Monocyte differentiation antigen CD14 OS=Mus musculus OX=10090 GN=Cd14 PE=1 SV=1	40	9	94	9	52.706	273.78	9	39.2	2.37414e+06	4.49118e+06	3.05933e+06	3.05933e+06	6.96396e+06	1.61815e+07	3.63327e+06	2.4559e+06	1.11923e+07	3.41424e+06	3.62299e+06	1.03042e+07	7.79103e+06	6	5	6	8	8	8	7	8	6	6	8	9	6	5	6	8	8	8	7	8	6	6	8	9
P84104	20383	Srsf3	FALSE	Serine/arginine-rich splicing factor 3 OS=Mus musculus OX=10090 GN=Srsf3 PE=1 SV=1	40	7	94	6	22.503	201.16	7	19.3	2.13113e+07	4.33045e+07	3.00539e+07	3.00539e+07	2.32193e+07	3.8288e+07	2.36117e+07	19510192	3.52929e+07	5.2456e+07	2.88376e+07	1.7645e+07	2.47644e+07	7	7	7	7	7	7	7	7	7	7	7	7	6	6	6	6	6	6	6	6	6	6	6	6
Q8R0F8	68636	Fahd1	TRUE	Acylpyruvase FAHD1, mitochondrial OS=Mus musculus OX=10090 GN=Fahd1 PE=1 SV=2	68	10	94	10	43.91	273.76	10	25.2	8.68944e+06	1.31259e+07	5.49268e+06	5.49268e+06	9.98866e+06	1.81071e+07	1.57068e+07	5.8903e+06	7.18578e+06	3.90449e+07	1.67645e+07	6.07953e+06	1.03993e+07	8	8	6	8	9	9	6	7	10	9	8	8	8	8	6	8	9	9	6	7	10	9	8	8
Q8CGF7	56070	Tcerg1	FALSE	Transcription elongation regulator 1 OS=Mus musculus OX=10090 GN=Tcerg1 PE=1 SV=2	19	19	94	19	68.939	215.26	19	123.7	6.67748e+06	1.27781e+07	5.38486e+06	5.38486e+06	6.59715e+06	1.60116e+07	6.87406e+06	5.80653e+06	5.08692e+06	6.50681e+06	8.49512e+06	7.47852e+06	8.51207e+06	17	19	14	14	18	17	16	13	14	17	17	17	17	19	14	14	18	17	16	13	14	17	17	17
O89023	12751	Tpp1	FALSE	Tripeptidyl-peptidase 1 OS=Mus musculus OX=10090 GN=Tpp1 PE=1 SV=2	28	7	94	7	41.765	287.77	7	61.3	5.27059e+07	6.94574e+07	2.95062e+07	2.95062e+07	3.15285e+07	6.89765e+07	3.10317e+07	2.76723e+07	3.33733e+07	8.47576e+07	4.69254e+07	1.76199e+07	3.35318e+07	6	5	4	5	5	6	6	5	6	7	6	6	6	5	4	5	5	6	6	5	6	7	6	6
P55050	14079	Fabp2	FALSE	Fatty acid-binding protein, intestinal OS=Mus musculus OX=10090 GN=Fabp2 PE=1 SV=2	40	6	93	6	22.027	216.34	6	15.1	3.26192e+07	5.77232e+07	2.68028e+07	2.68028e+07	3.06786e+07	4.77965e+07	3.40062e+07	1.78648e+07	2.47258e+07	6.48054e+07	4.12234e+07	1.36216e+07	3.25763e+07	6	6	6	6	6	6	6	6	6	6	6	6	6	6	6	6	6	6	6	6	6	6	6	6
P62270	20084	Rps18	FALSE	40S ribosomal protein S18 OS=Mus musculus OX=10090 GN=Rps18 PE=1 SV=3	49	9	93	9	32.505	225.4	9	17.7	8.16481e+06	1.31105e+07	9.56545e+06	9.56545e+06	7.01113e+06	1.15386e+07	9.44234e+06	8.45041e+06	7.15947e+06	1.5236e+07	9.56183e+06	5.69368e+06	8.95136e+06	9	9	9	8	9	9	9	8	9	9	8	9	9	9	9	8	9	9	9	8	9	9	8	9
P34884	17319	Mif	FALSE	Macrophage migration inhibitory factor OS=Mus musculus OX=10090 GN=Mif PE=1 SV=2	24	3	93	3	22.441	249.89	3	12.5	4.75447e+07	7.82023e+07	4.30369e+07	4.30369e+07	7.78316e+07	1.21015e+08	8.3222e+07	3.13737e+07	6.37496e+07	157568816	1.00445e+08	3.11908e+07	8.25403e+07	3	3	3	3	3	3	3	3	3	3	3	3	3	3	3	3	3	3	3	3	3	3	3	3
Q6PEE2	269037	Ctif	FALSE	CBP80/20-dependent translation initiation factor OS=Mus musculus OX=10090 GN=Ctif PE=1 SV=2	27	13	93	13	54.602	259.84	13	67.8	8.32286e+06	1.37707e+07	1.0273e+07	1.0273e+07	9.89013e+06	1.35187e+07	8.4888e+06	1.09555e+07	9.46814e+06	1.11159e+07	1.29408e+07	1.28766e+07	1.11348e+07	11	12	10	11	11	11	12	9	11	11	9	11	11	12	10	11	11	11	12	9	11	11	9	11
Q8C1D8	73473	Iws1	FALSE	Protein IWS1 homolog OS=Mus musculus OX=10090 GN=Iws1 PE=1 SV=1	14	9	93	9	46.899	221.74	9	85.2	3.46114e+06	6.00238e+06	6.66595e+06	6.66595e+06	3.97156e+06	5645327	3.42273e+06	5.26776e+06	5.82184e+06	5.3419e+06	4.29951e+06	6.73264e+06	4.92668e+06	8	8	8	8	8	8	8	8	8	8	9	8	8	8	8	8	8	8	8	8	8	8	9	8
Q61160	14082	Fadd	FALSE	FAS-associated death domain protein OS=Mus musculus OX=10090 GN=Fadd PE=1 SV=1	60	8	93	8	43.371	259.13	8	22.9	1.14177e+07	1.74803e+07	1.82444e+07	1.82444e+07	1.09184e+07	1.35349e+07	1.00845e+07	1.24714e+07	1.52155e+07	1.6835e+07	14717585	1.56515e+07	1.41623e+07	8	8	7	8	7	8	8	8	8	8	8	8	8	8	7	8	7	8	8	8	8	8	8	8
Q60772	12580	Cdkn2c	FALSE	Cyclin-dependent kinase 4 inhibitor C OS=Mus musculus OX=10090 GN=Cdkn2c PE=1 SV=1	54	6	93	6	32.275	285.54	6	18.1	6.2454e+06	1.85043e+07	1.24229e+07	1.24229e+07	1.21677e+07	1.77824e+07	10451687	8.52608e+06	1.28257e+07	1.07329e+07	1.34663e+07	1.65779e+07	2.16475e+07	5	6	6	6	6	6	6	6	5	6	6	6	5	6	6	6	6	6	6	6	5	6	6	6
Q9CZA6	67203	Nde1	FALSE	Nuclear distribution protein nudE homolog 1 OS=Mus musculus OX=10090 GN=Nde1 PE=1 SV=1	38	11	93	8	37.693	261.63	11	38.5	2.16991e+06	2.47266e+06	2.37012e+06	2.37012e+06	1.28321e+06	1.25887e+06	857544	3.30385e+06	3.19754e+06	1.46376e+06	1.5984e+06	2.9031e+06	2.01672e+06	11	10	10	9	7	7	11	11	8	9	9	9	8	7	7	6	4	4	8	8	5	6	6	6
Q8VI36	19303	Pxn	FALSE	Paxillin OS=Mus musculus OX=10090 GN=Pxn PE=1 SV=1	18	7	93	7	55.225	312.38	7	64.4	4.25181e+06	9.31505e+06	1.28164e+07	1.28164e+07	1.72782e+07	8.18805e+06	2.94678e+07	6.83969e+06	6.34615e+06	6.90245e+06	5.54842e+06	8.66826e+06	6.76614e+06	5	6	6	6	7	6	5	5	6	6	6	5	5	6	6	6	7	6	5	5	6	6	6	5
O54786	13347	Dffa	FALSE	DNA fragmentation factor subunit alpha OS=Mus musculus OX=10090 GN=Dffa PE=1 SV=2	35	10	93	10	41.883	265.48	10	36.6	8.36708e+06	1.42874e+07	9.45275e+06	9.45275e+06	1.07209e+07	1.24701e+07	9.00429e+06	9.18878e+06	1.15993e+07	1.15005e+07	1.15119e+07	1.13224e+07	1.27693e+07	8	9	7	9	9	9	9	8	8	9	8	9	8	9	7	9	9	9	9	8	8	9	8	9
Q8C8T8	69499	Tsr2	FALSE	Pre-rRNA-processing protein TSR2 homolog OS=Mus musculus OX=10090 GN=Tsr2 PE=1 SV=1	42	6	93	6	30.257	268.57	6	20.9	9.25242e+06	1.68053e+07	1.65605e+07	1.65605e+07	1.13618e+07	1.27318e+07	9.48565e+06	1.4422e+07	1.61123e+07	1.21391e+07	1.2085e+07	1.79642e+07	1.38028e+07	5	6	6	5	6	6	6	6	6	5	6	5	5	6	6	5	6	6	6	6	6	5	6	5
Q8CH18	67500	Ccar1	FALSE	Cell division cycle and apoptosis regulator protein 1 OS=Mus musculus OX=10090 GN=Ccar1 PE=1 SV=1	9	9	93	9	40.514	219.23	9	132	6.00747e+06	1.246e+07	8.16441e+06	8.16441e+06	6.05348e+06	1.32487e+07	7.13005e+06	7.2264e+06	7.33267e+06	5.70898e+06	1.02451e+07	8.39729e+06	8.34799e+06	9	8	8	9	9	9	7	8	7	9	8	9	9	8	8	9	9	9	7	8	7	9	8	9
P46414	12576	Cdkn1b	FALSE	Cyclin-dependent kinase inhibitor 1B OS=Mus musculus OX=10090 GN=Cdkn1b PE=1 SV=2	65	10	93	10	41.476	240.62	10	22.2	6.17425e+06	1.06047e+07	1.30751e+07	1.30751e+07	7.73513e+06	1.05572e+07	6.41378e+06	1.05109e+07	1.22683e+07	9.99224e+06	9.25338e+06	1.29306e+07	1.14347e+07	8	7	9	8	8	8	8	9	7	8	9	8	8	7	9	8	8	8	8	9	7	8	9	8
Q921W0	234852	Chmp1a	FALSE	Charged multivesicular body protein 1a OS=Mus musculus OX=10090 GN=Chmp1a PE=1 SV=1	29	7	93	7	23.823	192.35	7	21.6	9.56479e+06	1.56351e+07	1.58406e+07	1.58406e+07	7.86357e+06	1.03629e+07	6.12742e+06	1.21276e+07	1.49365e+07	1.19847e+07	9.61016e+06	1.21483e+07	1.18102e+07	7	7	7	7	7	7	7	7	7	7	7	7	7	7	7	7	7	7	7	7	7	7	7	7
O54962	23825	Banf1	FALSE	Barrier-to-autointegration factor OS=Mus musculus OX=10090 GN=Banf1 PE=1 SV=1	51	4	93	4	26.12	269.7	4	10.1	1.2803e+07	3.18477e+07	9.89827e+06	9.89827e+06	1.67876e+07	2.78735e+07	2.35316e+07	1.98113e+07	1.57744e+07	4.03046e+07	2.55125e+07	1.19475e+07	2.73071e+07	4	4	4	4	4	4	4	4	4	4	4	4	4	4	4	4	4	4	4	4	4	4	4	4
Q64442	20322	Sord	FALSE	Sorbitol dehydrogenase OS=Mus musculus OX=10090 GN=Sord PE=1 SV=3	23	7	93	7	43.419	279.48	7	38.2	1.91872e+07	3.98661e+07	2.59542e+07	2.59542e+07	2.49448e+07	4.09628e+07	2.81491e+07	1.97706e+07	1.81956e+07	3.17629e+07	3.34131e+07	2.5506e+07	3.5493e+07	7	7	7	7	7	7	7	6	7	7	7	7	7	7	7	7	7	7	7	6	7	7	7	7
O09164	20657	Sod3	FALSE	Extracellular superoxide dismutase [Cu-Zn] OS=Mus musculus OX=10090 GN=Sod3 PE=1 SV=1	34	6	92	6	43.399	274.38	6	27.4	1.09749e+07	1.39673e+07	9.54681e+06	9.54681e+06	1.78235e+07	2.54978e+07	1.74677e+07	9.44207e+06	1.2687e+07	1.47616e+07	2.37542e+07	1.31234e+07	1.97879e+07	6	6	5	6	6	6	6	6	6	6	6	6	6	6	5	6	6	6	6	6	6	6	6	6
P16331	18478	Pah	FALSE	Phenylalanine-4-hydroxylase OS=Mus musculus OX=10090 GN=Pah PE=1 SV=4	29	13	92	13	43.125	213.28	13	51.9	9.38014e+06	1.46365e+07	1.3121e+07	1.3121e+07	8.1456e+06	1.66987e+07	9.0268e+06	9.20759e+06	1.21044e+07	1.53243e+07	1.23608e+07	7.16167e+06	8.95942e+06	13	12	10	11	12	13	11	13	12	11	10	11	13	12	10	11	12	13	11	13	12	11	10	11
P97868	19647	Rbbp6	FALSE	E3 ubiquitin-protein ligase RBBP6 OS=Mus musculus OX=10090 GN=Rbbp6 PE=1 SV=5	10	15	92	15	52.11	234.98	15	199.5	3.79053e+06	1.00936e+07	7.12766e+06	7.12766e+06	4.02383e+06	8.88925e+06	3.83938e+06	5.94778e+06	7.29019e+06	5.23769e+06	5.94916e+06	7.24044e+06	5.89935e+06	14	14	12	12	13	14	13	14	12	13	14	13	14	14	12	12	13	14	13	14	12	13	14	13
P17225	19205	Ptbp1	FALSE	Polypyrimidine tract-binding protein 1 OS=Mus musculus OX=10090 GN=Ptbp1 PE=1 SV=2	23	8	92	8	44.431	290.39	8	56.4	1.38878e+07	4.4642e+07	2.14141e+07	2.14141e+07	1.64461e+07	3.69957e+07	1.56024e+07	2.05544e+07	2.41342e+07	1.68878e+07	2.09949e+07	2.48553e+07	2.03473e+07	9	9	6	8	9	8	9	9	7	8	9	9	9	9	6	8	9	8	9	9	7	8	9	9
Q91V76	70984	4931406C07Rik	FALSE	Ester hydrolase C11orf54 homolog OS=Mus musculus OX=10090 PE=1 SV=1	51	13	92	13	58.032	237.75	13	35	9.59939e+06	1.74357e+07	6.0683e+06	6.0683e+06	1.61659e+07	3.1013e+07	2.73727e+07	4.805e+06	5.60868e+06	4.52229e+07	2.67174e+07	5.51941e+06	1.30879e+07	12	11	8	11	12	12	9	9	13	12	7	11	12	11	8	11	12	12	9	9	13	12	7	11
Q9QUR7	23988	Pin1	FALSE	Peptidyl-prolyl cis-trans isomerase NIMA-interacting 1 OS=Mus musculus OX=10090 GN=Pin1 PE=1 SV=1	71	8	92	8	50.422	276.69	8	18.4	1.2088e+07	2.35444e+07	1.57313e+07	1.57313e+07	1.09891e+07	1.38567e+07	1.14372e+07	1.33389e+07	1.82351e+07	2.06326e+07	1.46238e+07	1.43282e+07	1.43188e+07	7	7	7	7	6	6	7	7	8	7	7	7	7	7	7	7	6	6	7	7	8	7	7	7
Q3TGF2	66540	Fam107b	FALSE	Protein FAM107B OS=Mus musculus OX=10090 GN=Fam107b PE=1 SV=2	48	8	92	8	30.094	287.11	8	15.6	1.03553e+07	2.84688e+07	2.76501e+07	2.76501e+07	2.29681e+07	2.18069e+07	1.37799e+07	2.36985e+07	2.82736e+07	2.10481e+07	1.72349e+07	3.10217e+07	23126516	6	7	7	8	7	8	6	8	7	8	8	8	6	7	7	8	7	8	6	8	7	8	8	8
Q9D8S3	66251	Arfgap3	FALSE	ADP-ribosylation factor GTPase-activating protein 3 OS=Mus musculus OX=10090 GN=Arfgap3 PE=1 SV=2	22	12	92	12	43.618	246.04	12	57.4	4.41541e+06	6.82353e+06	5301676	5301676	2.7898e+06	2.85492e+06	2.90174e+06	7.9071e+06	9.05004e+06	3.81239e+06	2.75879e+06	7.51586e+06	4.92408e+06	11	11	10	10	9	11	12	11	9	10	12	11	11	11	10	10	9	11	12	11	9	10	12	11
P35951	16835	Ldlr	FALSE	Low-density lipoprotein receptor OS=Mus musculus OX=10090 GN=Ldlr PE=1 SV=2	19	10	92	10	42.233	229.53	10	94.9	9.76274e+06	3.911e+07	2.44646e+07	2.44646e+07	5.51952e+06	5.83217e+06	4.69186e+06	2.58803e+07	4.83019e+07	17731262	9.22183e+06	5.51359e+07	32490435	9	9	8	9	8	7	10	9	10	10	4	9	9	9	8	9	8	7	10	9	10	10	4	9
P47955	56040	Rplp1	FALSE	60S acidic ribosomal protein P1 OS=Mus musculus OX=10090 GN=Rplp1 PE=1 SV=1	81	4	92	4	30.707	374.62	4	11.5	2.22548e+08	4.47331e+08	267215097	267215097	2.24018e+08	2.99596e+08	1.75921e+08	2.99512e+08	3.20774e+08	4.03788e+08	2.71218e+08	2.62136e+08	3.20654e+08	4	4	4	4	4	4	4	4	4	4	4	4	4	4	4	4	4	4	4	4	4	4	4	4
Q8VDQ1	77219	Ptgr2	FALSE	Prostaglandin reductase 2 OS=Mus musculus OX=10090 GN=Ptgr2 PE=1 SV=2	56	13	92	13	69.448	277.78	13	38	1.16013e+07	1.46982e+07	4.08802e+06	4.08802e+06	9.34787e+06	1.73745e+07	1.58063e+07	3.16603e+06	3.26243e+06	2.53311e+07	1.96219e+07	3.21967e+06	1.08073e+07	10	10	8	10	10	13	8	7	12	12	8	9	10	10	8	10	10	13	8	7	12	12	8	9
Q99LD8	51793	Ddah2	FALSE	N(G),N(G)-dimethylarginine dimethylaminohydrolase 2 OS=Mus musculus OX=10090 GN=Ddah2 PE=1 SV=1	32	8	91	8	34.183	259.26	8	29.6	8.07674e+06	1.34868e+07	5.19571e+06	5.19571e+06	9.3246e+06	1.62057e+07	1.26155e+07	5.14523e+06	4.83213e+06	1.41784e+07	1.4657e+07	5.1627e+06	9.68409e+06	7	7	7	8	8	8	6	6	8	8	7	8	7	7	7	8	8	8	6	6	8	8	7	8
P70444	12122	Bid	TRUE	BH3-interacting domain death agonist OS=Mus musculus OX=10090 GN=Bid PE=1 SV=2	52	6	91	6	38.7	314.41	6	21.9	1.43827e+07	2.40469e+07	2.42205e+07	2.42205e+07	1.61874e+07	1.45061e+07	1.50996e+07	1.88572e+07	2.81699e+07	2.28886e+07	1.67216e+07	2.58696e+07	2.28127e+07	6	6	5	6	5	6	6	6	6	6	6	6	6	6	5	6	5	6	6	6	6	6	6	6
P06339	15040	H2-T23	FALSE	H-2 class I histocompatibility antigen, D-37 alpha chain OS=Mus musculus OX=10090 GN=H2-T23 PE=1 SV=1	20	6	91	2	26.804	190.38	6	40.8	378450	590193	460352	460352	188087	556350	353899	314809	581947	777101	561062	316031	501308	5	6	5	5	6	6	6	5	5	5	5	6	1	2	2	1	2	2	2	1	1	1	1	2
Q64191	11593	Aga	FALSE	N(4)-(beta-N-acetylglucosaminyl)-L-asparaginase OS=Mus musculus OX=10090 GN=Aga PE=1 SV=1	29	8	91	8	42.546	272.13	8	37	7.66877e+06	1.07717e+07	9.73571e+06	9.73571e+06	6.7088e+06	10662158	5.07993e+06	8.76187e+06	1.03594e+07	8.56446e+06	8.0366e+06	1.06355e+07	1.02937e+07	8	8	7	7	8	6	7	8	7	7	8	7	8	8	7	7	8	6	7	8	7	7	8	7
P62077	30057	Timm8b	TRUE	Mitochondrial import inner membrane translocase subunit Tim8 B OS=Mus musculus OX=10090 GN=Timm8b PE=1 SV=1	61	5	91	5	17.094	247.26	5	9.3	3.45714e+07	6.99575e+07	5.32754e+07	5.32754e+07	3.89777e+07	5.44145e+07	3.61752e+07	5.03698e+07	5.19486e+07	9.02621e+07	4.42747e+07	6.69806e+07	52376901	5	5	5	5	5	5	5	5	5	5	5	5	5	5	5	5	5	5	5	5	5	5	5	5
Q9CQ89	67675	Cuta	FALSE	Protein CutA OS=Mus musculus OX=10090 GN=Cuta PE=1 SV=3	39	4	91	4	39.014	273.39	4	18.9	1.76098e+07	3.6657e+07	2.38145e+07	2.38145e+07	2.38689e+07	3.04433e+07	2.40844e+07	24260904	2.42228e+07	2.96442e+07	2.7886e+07	2.73679e+07	3.15986e+07	3	3	3	3	3	3	4	3	3	3	3	3	3	3	3	3	3	3	4	3	3	3	3	3
Q8CH25	66660	Sltm	FALSE	SAFB-like transcription modulator OS=Mus musculus OX=10090 GN=Sltm PE=1 SV=1	18	15	91	15	78.953	255.13	15	116.9	6.4066e+06	1.71578e+07	1.41717e+07	1.41717e+07	8.19645e+06	1.14527e+07	5.55304e+06	1.18609e+07	1.15764e+07	9.12349e+06	6.65902e+06	1.1204e+07	9.41459e+06	12	12	13	14	13	11	12	13	11	13	13	14	12	12	13	14	13	11	12	13	11	13	13	14
Q9CWM4	67199	Pfdn1	FALSE	Prefoldin subunit 1 OS=Mus musculus OX=10090 GN=Pfdn1 PE=1 SV=1	70	9	91	8	32.7	236.91	9	14.2	1.45123e+07	2.70853e+07	2.10897e+07	2.10897e+07	1.68409e+07	2.44683e+07	1.76917e+07	1.63935e+07	1.96857e+07	2.70618e+07	1.95342e+07	2.14088e+07	2.64539e+07	9	9	8	9	9	9	9	8	9	9	9	9	8	8	7	8	8	8	8	7	8	8	8	8
Q9EQ20	104776	Aldh6a1	TRUE	Methylmalonate-semialdehyde dehydrogenase [acylating], mitochondrial OS=Mus musculus OX=10090 GN=Aldh6a1 PE=1 SV=1	41	15	90	15	60.439	256.98	15	57.9	1.00876e+07	1.76946e+07	1.04248e+07	1.04248e+07	1.16623e+07	3.4805e+07	2.03734e+07	8.37223e+06	6.9093e+06	8.84097e+07	8.8198e+07	7.18568e+06	5.2373e+07	11	12	7	12	12	13	10	7	13	14	8	10	11	12	7	12	12	13	10	7	13	14	8	10
Q99JZ7	74155	Errfi1	FALSE	ERBB receptor feedback inhibitor 1 OS=Mus musculus OX=10090 GN=Errfi1 PE=1 SV=1	31	9	90	9	47.078	235.86	9	50	6.042e+06	1.0287e+07	1.02365e+07	1.02365e+07	6.11048e+06	1.14804e+07	6.50848e+06	8.28418e+06	8.94788e+06	9.20875e+06	9.29257e+06	8.67091e+06	7.52373e+06	7	6	8	8	8	8	8	8	8	8	8	9	7	6	8	8	8	8	8	8	8	8	8	9
Q69ZQ2	57905	Isy1	FALSE	Pre-mRNA-splicing factor ISY1 homolog OS=Mus musculus OX=10090 GN=Isy1 PE=1 SV=2	34	9	90	9	38.165	263.96	9	33	5.69935e+06	1.10081e+07	1.13059e+07	1.13059e+07	7.08509e+06	1.00382e+07	5.82388e+06	7.53031e+06	9.6508e+06	9.02842e+06	9.96761e+06	9.90567e+06	8.97399e+06	9	8	9	8	9	8	8	9	9	9	8	8	9	8	9	8	9	8	8	9	9	9	8	8
Q80YR4	213753	Zfp598	FALSE	E3 ubiquitin-protein ligase ZNF598 OS=Mus musculus OX=10090 GN=Znf598 PE=1 SV=1	17	11	90	11	48.549	281.38	11	99.1	4.10993e+06	6.86478e+06	4.63285e+06	4.63285e+06	3.3489e+06	4.36126e+06	3.47012e+06	5.4191e+06	4.80047e+06	3.90615e+06	4.46727e+06	5.45386e+06	4.18125e+06	9	7	8	8	7	8	10	8	8	9	9	7	9	7	8	8	7	8	10	8	8	9	9	7
O35295	19291	Purb	FALSE	Transcriptional activator protein Pur-beta OS=Mus musculus OX=10090 GN=Purb PE=1 SV=3	53	8	90	8	36.95	300.29	8	33.9	5.28996e+06	7.63084e+06	3.81546e+06	3.81546e+06	6.07472e+06	9.45856e+06	6.08653e+06	4.64822e+06	4.72137e+06	9.38349e+06	8.88743e+06	3.73433e+06	7.12114e+06	8	8	7	8	8	8	8	8	8	8	7	8	8	8	7	8	8	8	8	8	8	8	7	8
Q80W00	52040	Ppp1r10	FALSE	Serine/threonine-protein phosphatase 1 regulatory subunit 10 OS=Mus musculus OX=10090 GN=Ppp1r10 PE=1 SV=1	24	13	90	13	48.463	229.34	13	94.3	3.0709e+06	6.64326e+06	5.48378e+06	5.48378e+06	3.50042e+06	5.81786e+06	3.00914e+06	4.62119e+06	4.90452e+06	3.31435e+06	4.57429e+06	6.24042e+06	5.15531e+06	10	11	11	10	11	10	12	13	10	11	13	11	10	11	11	10	11	10	12	13	10	11	13	11
P19221	14061	F2	FALSE	Prothrombin OS=Mus musculus OX=10090 GN=F2 PE=1 SV=1	25	13	90	13	39.962	204.91	13	70.2	1.06017e+07	1.27992e+07	4.84771e+06	4.84771e+06	9.89111e+06	1.29513e+07	1.1559e+07	5.63468e+06	5.56914e+06	2.13487e+07	1.36692e+07	4.65787e+06	8.16497e+06	12	11	7	12	12	12	12	11	13	13	9	11	12	11	7	12	12	12	12	11	13	13	9	11
Q80U93	227720	Nup214	FALSE	Nuclear pore complex protein Nup214 OS=Mus musculus OX=10090 GN=Nup214 PE=1 SV=2	12	15	90	15	65.584	273.83	15	212.8	5.79399e+06	8.12118e+06	7.87335e+06	7.87335e+06	5.78022e+06	8.26055e+06	5.91547e+06	7.30152e+06	7.36896e+06	7.45884e+06	7.33975e+06	6.8868e+06	7.5881e+06	11	11	11	10	10	11	11	13	9	11	11	12	11	11	11	10	10	11	11	13	9	11	11	12
P43024	12861	Cox6a1	TRUE	Cytochrome c oxidase subunit 6A1, mitochondrial OS=Mus musculus OX=10090 GN=Cox6a1 PE=1 SV=2	35	3	89	3	38.033	305.04	3	12.3	1.07268e+08	7.98421e+07	1.06292e+08	1.06292e+08	50259564	9.40623e+07	7.76385e+07	1.37774e+08	1.28142e+08	2.22556e+08	2.49989e+08	1.74536e+08	1.86437e+08	3	3	3	3	3	3	3	3	3	3	3	3	3	3	3	3	3	3	3	3	3	3	3	3
Q8CAQ8	76614	Immt	TRUE	MICOS complex subunit Mic60 OS=Mus musculus OX=10090 GN=Immt PE=1 SV=1	31	19	89	19	83.499	253.93	19	83.8	3.62271e+07	7.53766e+07	6.6537e+07	6.6537e+07	3.83004e+07	7.83052e+07	4.72131e+07	4.65432e+07	5.64505e+07	1.09232e+08	5.40838e+07	8.59788e+07	5.58825e+07	12	17	8	13	16	18	12	12	18	18	13	14	12	17	8	13	16	18	12	12	18	18	13	14
Q9JJT9	56698	Phax	FALSE	Phosphorylated adapter RNA export protein OS=Mus musculus OX=10090 GN=Phax PE=1 SV=1	31	11	89	11	41.58	211.7	11	43.2	4.82896e+06	9.36836e+06	1.20421e+07	1.20421e+07	7.22877e+06	7.88654e+06	5.34822e+06	7.45288e+06	8.52685e+06	6.6938e+06	6.92386e+06	9.00499e+06	7.53995e+06	9	9	10	11	9	8	10	9	8	9	9	10	9	9	10	11	9	8	10	9	8	9	9	10
Q5FW60	381530	Mup20	FALSE	Major urinary protein 20 OS=Mus musculus OX=10090 GN=Mup20 PE=1 SV=1	47	7	89	4	42.265	225.15	7	20.9	8.74804e+06	9.59835e+06	3.93378e+06	3.93378e+06	322855	186967		4.12521e+06	4.80043e+06	3.67084e+07	857336	12120.5		7	7	7	3	3	1	7	7	7	3	2	1	4	4	4	0	0	0	4	4	4	1	0	0
Q8VEA4	72170	Chchd4	TRUE	Mitochondrial intermembrane space import and assembly protein 40 OS=Mus musculus OX=10090 GN=Chchd4 PE=1 SV=1	42	4	89	4	23.976	187.37	4	15.5	1.15306e+07	1.62766e+07	2.18189e+07	2.18189e+07	1.15481e+07	1.49912e+07	9.75864e+06	2.68647e+07	2.83341e+07	2.49106e+07	1.92032e+07	4.92236e+07	2.41253e+07	4	4	4	4	4	4	4	4	4	4	4	4	4	4	4	4	4	4	4	4	4	4	4	4
Q99JW2	109652	Acy1	FALSE	Aminoacylase-1 OS=Mus musculus OX=10090 GN=Acy1 PE=1 SV=1	57	17	89	17	75.637	230.43	17	45.8	3.83643e+06	5.8514e+06	581636	581636	7.85163e+06	1.86848e+07	2.0861e+07	666491	663550	2.34996e+07	1.53695e+07	1.1284e+06	5.69957e+06	10	11	3	13	13	15	5	4	14	15	8	13	10	11	3	13	13	15	5	4	14	15	8	13
P56376	66204	Acyp1	FALSE	Acylphosphatase-1 OS=Mus musculus OX=10090 GN=Acyp1 PE=1 SV=2	82	8	89	8	30.241	218.32	8	11.2	5.66259e+07	1.39415e+08	1.25522e+08	1.25522e+08	6.16284e+07	9.94989e+07	6.23681e+07	5.52647e+07	7.82733e+07	1.3497e+08	5.67827e+07	3.7199e+07	5.24656e+07	6	8	7	7	8	7	6	7	8	8	8	8	6	8	7	7	8	7	6	7	8	8	8	8
P60840	56205	Ensa	FALSE	Alpha-endosulfine OS=Mus musculus OX=10090 GN=Ensa PE=1 SV=1	50	5	89	4	30.01	227.44	5	13.3	2.84847e+06	6.60089e+06	6.98118e+06	6.98118e+06	4.88593e+06	5.15617e+06	3.12766e+06	5.20301e+06	6.99241e+06	6.02393e+06	3.32773e+06	4.61997e+06	6.10977e+06	5	5	5	5	5	5	5	5	5	5	5	5	4	4	4	4	4	4	4	4	4	4	4	4
P61961	67890	Ufm1	FALSE	Ubiquitin-fold modifier 1 OS=Mus musculus OX=10090 GN=Ufm1 PE=1 SV=1	68	5	89	5	25.962	289.16	5	9.1	2.95075e+07	6.06107e+07	4.18618e+07	4.18618e+07	3.00816e+07	5.21421e+07	2.93279e+07	3.01755e+07	3.64138e+07	5.76251e+07	3.78915e+07	3.51111e+07	4.75516e+07	5	5	5	5	5	5	5	5	5	5	5	5	5	5	5	5	5	5	5	5	5	5	5	5
Q9CQW9	66141	Ifitm3	FALSE	Interferon-induced transmembrane protein 3 OS=Mus musculus OX=10090 GN=Ifitm3 PE=1 SV=1	48	4	89	3	39.163	253.43	4	14.9	7.68302e+06	1.13902e+07	9.03572e+06	9.03572e+06	7.47693e+06	7.54436e+06	6.98915e+06	6.82874e+06	9.18196e+06	1.23945e+07	9.04714e+06	4.93659e+06	1.26856e+07	4	4	4	4	4	4	4	4	4	4	3	4	3	3	3	3	3	3	3	3	3	3	2	3
O35639	11745	Anxa3	FALSE	Annexin A3 OS=Mus musculus OX=10090 GN=Anxa3 PE=1 SV=4	38	12	88	12	47.921	221.44	12	36.4	4.123e+06	9.42448e+06	1.9623e+06	1.9623e+06	6.70824e+06	1.92195e+07	1.42152e+07	627261	1.57234e+06	2.3012e+07	1.21965e+07	377723	8.64123e+06	9	11	8	9	12	11	5	7	12	11	3	11	9	11	8	9	12	11	5	7	12	11	3	11
Q08857	12491	Cd36	FALSE	Platelet glycoprotein 4 OS=Mus musculus OX=10090 GN=Cd36 PE=1 SV=2	33	10	88	10	40.136	227.92	10	52.7	6.68936e+06	1.01089e+07	1.11329e+07	1.11329e+07	1.11399e+07	1.45152e+07	1.02405e+07	8.169e+06	9.03279e+06	1.5221e+07	2.07456e+07	8.79326e+06	2.04567e+07	7	8	9	9	9	9	9	9	8	10	8	9	7	8	9	9	9	9	9	9	8	10	8	9
Q8VE88	67726	Fam114a2	FALSE	Protein FAM114A2 OS=Mus musculus OX=10090 GN=Fam114a2 PE=1 SV=2	42	14	88	14	60.233	262.18	14	54	9.34745e+06	1.53815e+07	9.36438e+06	9.36438e+06	8.76153e+06	1.32811e+07	8.54245e+06	6.75434e+06	9.17997e+06	1.76662e+07	1.26549e+07	8.62493e+06	1.11323e+07	14	13	11	10	13	10	11	12	12	14	12	13	14	13	11	10	13	10	11	12	12	14	12	13
Q9QY93	66422	Dctpp1	FALSE	dCTP pyrophosphatase 1 OS=Mus musculus OX=10090 GN=Dctpp1 PE=1 SV=1	52	8	88	8	35.559	224.55	8	18.8	5.9285e+06	1.34239e+07	1.45893e+07	1.45893e+07	9.45488e+06	1.17126e+07	7.27067e+06	9.05137e+06	9.9001e+06	1.10907e+07	9.90792e+06	1.08601e+07	1.39675e+07	7	6	7	6	7	7	7	8	6	8	8	8	7	6	7	6	7	7	7	8	6	8	8	8
Q9JMG7	29877	Hdgfl3	FALSE	Hepatoma-derived growth factor-related protein 3 OS=Mus musculus OX=10090 GN=Hdgfl3 PE=1 SV=2	43	8	88	6	34.175	224.1	8	22.4	1.92014e+06	3.45646e+06	4.36334e+06	4.36334e+06	4.24469e+06	7.89816e+06	3.94373e+06	3.81454e+06	4.38534e+06	3.56243e+06	4.40104e+06	4.78143e+06	5.01617e+06	7	7	8	8	8	8	8	8	7	8	8	8	5	5	6	6	6	6	6	6	5	6	6	6
O88630	53334	Gosr1	FALSE	Golgi SNAP receptor complex member 1 OS=Mus musculus OX=10090 GN=Gosr1 PE=1 SV=2	45	8	88	8	41.161	261.84	8	28.5	7.22236e+06	1.47487e+07	7.42918e+06	7.42918e+06	7.52305e+06	1.17664e+07	8.49393e+06	8.0521e+06	7.9081e+06	1.14826e+07	8.56048e+06	8.74231e+06	9.28178e+06	7	8	7	7	8	8	7	8	7	7	7	7	7	8	7	7	8	8	7	8	7	7	7	7
Q80XA6	194590	Reps2	FALSE	RalBP1-associated Eps domain-containing protein 2 OS=Mus musculus OX=10090 GN=Reps2 PE=1 SV=2	17	8	88	7	31.846	253.63	8	70.4	3.40039e+06	6.28593e+06	3.19632e+06	3.19632e+06	4.01692e+06	4.20266e+06	3.71113e+06	3.51927e+06	4.72803e+06	6.28471e+06	5.93868e+06	4.48733e+06	5.52218e+06	7	7	7	8	7	7	8	7	7	8	7	8	6	6	6	7	6	6	7	6	6	7	6	7
Q80Y14	73046	Glrx5	TRUE	Glutaredoxin-related protein 5, mitochondrial OS=Mus musculus OX=10090 GN=Glrx5 PE=1 SV=2	35	4	88	4	21.425	255.78	4	16.3	4.24407e+07	8.72506e+07	5.51723e+07	5.51723e+07	4.57192e+07	1.14631e+08	5.60523e+07	4.3913e+07	6.27098e+07	1.46482e+08	8.58678e+07	4.69048e+07	7.75758e+07	4	4	4	4	4	4	4	4	4	4	4	4	4	4	4	4	4	4	4	4	4	4	4	4
Q91WE2	102122	Psme3ip1	FALSE	PSME3-interacting protein OS=Mus musculus OX=10090 GN=Psme3ip1 PE=1 SV=1	30	11	88	11	43.763	225.64	11	28.7	6.8514e+06	1.30313e+07	1.69122e+07	1.69122e+07	9.91647e+06	1.1953e+07	7.28758e+06	1.22302e+07	1.40674e+07	1.00497e+07	9.75668e+06	1.31167e+07	1.15933e+07	10	11	11	10	11	10	11	11	11	10	10	10	10	11	11	10	11	10	11	11	11	10	10	10
Q5NBX1	12808	Cobl	FALSE	Protein cordon-bleu OS=Mus musculus OX=10090 GN=Cobl PE=1 SV=1	15	14	88	14	52.244	219.84	14	143.8	2.29124e+06	4.8392e+06	4.12567e+06	4.12567e+06	2.99085e+06	2.95411e+06	2.34224e+06	3.38804e+06	3.5138e+06	4.57566e+06	3.18506e+06	3.77985e+06	3.22075e+06	10	12	10	13	9	9	13	11	11	12	12	11	10	12	10	13	9	9	13	11	11	12	12	11
Q9R0Q7	56351	Ptges3	FALSE	Prostaglandin E synthase 3 OS=Mus musculus OX=10090 GN=Ptges3 PE=1 SV=1	46	7	88	7	34.103	229.55	7	18.7	2.49022e+07	3.95062e+07	2.48883e+07	2.48883e+07	2.92052e+07	4.60309e+07	3.08098e+07	3.18588e+07	3.13473e+07	4.3641e+07	4.21618e+07	2.84902e+07	3.42205e+07	6	6	6	6	6	7	6	6	6	6	5	6	6	6	6	6	6	7	6	6	6	6	5	6
P70699	14387	Gaa	FALSE	Lysosomal alpha-glucosidase OS=Mus musculus OX=10090 GN=Gaa PE=1 SV=2	9	8	87	8	33.351	231.74	8	106.2	1.32881e+07	2.3526e+07	1.60219e+07	1.60219e+07	1.70478e+07	2.44006e+07	1.41603e+07	1.22388e+07	1.5038e+07	2.26864e+07	1.86249e+07	1.2234e+07	1.73066e+07	7	8	6	8	8	8	7	7	8	8	8	8	7	8	6	8	8	8	7	7	8	8	8	8
Q99LY9	595136	Ndufs5	TRUE	NADH dehydrogenase [ubiquinone] iron-sulfur protein 5 OS=Mus musculus OX=10090 GN=Ndufs5 PE=1 SV=3	59	6	87	6	34.519	210	6	12.6	1.26347e+07	2.28871e+07	1.71729e+07	1.71729e+07	1.24757e+07	2.30047e+07	1.71305e+07	8.87072e+06	8.28827e+06	1.49888e+07	1.45389e+07	4.46982e+06	1.22278e+07	6	6	6	5	6	5	6	6	6	6	6	6	6	6	6	5	6	5	6	6	6	6	6	6
Q8VDM6	232989	Hnrnpul1	FALSE	Heterogeneous nuclear ribonucleoprotein U-like protein 1 OS=Mus musculus OX=10090 GN=Hnrnpul1 PE=1 SV=1	13	8	87	8	40.808	267.41	8	95.9	3.85177e+06	9.86629e+06	6.48745e+06	6.48745e+06	4.63992e+06	7.79073e+06	3.31585e+06	6.7226e+06	7.87266e+06	3.36607e+06	4.50202e+06	8.19979e+06	6.8736e+06	7	7	7	7	7	7	8	7	6	7	8	7	7	7	7	7	7	7	8	7	6	7	8	7
Q64726	12007	Azgp1	FALSE	Zinc-alpha-2-glycoprotein OS=Mus musculus OX=10090 GN=Azgp1 PE=1 SV=2	25	7	87	7	32.667	217.35	7	35.3	9.30821e+06	6.70764e+06	3.12501e+06	3.12501e+06	4.69062e+06	6.56753e+06	5.76075e+06	3.53716e+06	4.13992e+06	8.60511e+06	7.45015e+06	2.5454e+06	5.10382e+06	7	7	5	7	6	7	7	7	7	7	7	7	7	7	5	7	6	7	7	7	7	7	7	7
O35988	20971	Sdc4	FALSE	Syndecan-4 OS=Mus musculus OX=10090 GN=Sdc4 PE=1 SV=1	29	6	87	6	38.266	218.73	6	21.5	1.30516e+07	1.44897e+07	2.59058e+07	2.59058e+07	1.19218e+07	1.87666e+07	6.04647e+06	1.53851e+07	1.50687e+07	1.63404e+07	1.39113e+07	1.57803e+07	1.44117e+07	6	6	6	6	6	5	6	6	6	6	6	6	6	6	6	6	6	5	6	6	6	6	6	6
P0DOV2	15951	Ifi204	FALSE	Interferon-activable protein 204 OS=Mus musculus OX=10090 GN=Ifi204 PE=1 SV=1	20	8	87	3	48.11	238.17	8	69.4	4.2818e+06	1.04571e+07	6.53597e+06	6.53597e+06	7.8218e+06	6.54306e+06	4.60453e+06	4.84597e+06	1.1237e+07	6.42458e+06	6.82017e+06	1.18297e+07	1.14921e+07	7	7	7	7	6	6	6	7	7	6	8	7	3	3	3	3	2	2	3	3	3	2	3	3
Q3TCN2	71772	Plbd2	FALSE	Putative phospholipase B-like 2 OS=Mus musculus OX=10090 GN=Plbd2 PE=1 SV=2	14	7	87	7	44.392	214.91	7	66.2	1.42751e+07	2.94765e+07	1.15146e+07	1.15146e+07	1.54914e+07	2.2761e+07	1.38141e+07	1.03469e+07	1.22288e+07	2.48865e+07	1.74812e+07	8.11407e+06	1.49899e+07	7	7	5	7	7	6	5	5	7	7	6	6	7	7	5	7	7	6	5	5	7	7	6	6
P68368	22145	Tuba4a	FALSE	Tubulin alpha-4A chain OS=Mus musculus OX=10090 GN=Tuba4a PE=1 SV=1	38	12	87	3	50.293	250.89	12	49.9	2.70461e+06	4.0098e+06	1.84022e+06	1.84022e+06	2.30359e+06	5.42587e+06	3.94958e+06	2.25843e+06	2.15667e+06	2.97181e+06	3.97452e+06	2.9214e+06	2.85938e+06	10	11	6	12	12	12	8	7	10	12	7	9	3	3	2	3	3	3	3	1	2	3	2	3
Q63829	12238	Commd3	FALSE	COMM domain-containing protein 3 OS=Mus musculus OX=10090 GN=Commd3 PE=1 SV=1	64	10	86	10	40.655	268.85	10	22	1.82698e+07	3.20629e+07	1.82448e+07	1.82448e+07	1.75786e+07	2.5726e+07	1.82752e+07	1.43217e+07	1.70778e+07	3.12661e+07	2.52222e+07	1.40464e+07	2.32839e+07	8	9	8	8	8	8	8	8	8	8	8	8	8	9	8	8	8	8	8	8	8	8	8	8
Q9D1F4	67605	Akt1s1	FALSE	Proline-rich AKT1 substrate 1 OS=Mus musculus OX=10090 GN=Akt1s1 PE=1 SV=1	28	5	86	5	29.217	269.12	5	27.5	1.08091e+07	1.72357e+07	1.58103e+07	1.58103e+07	1.14386e+07	1.28096e+07	9.42376e+06	1.59474e+07	1.74152e+07	1.52491e+07	1.37829e+07	1.93803e+07	1.69328e+07	5	5	5	5	5	5	5	5	5	5	5	5	5	5	5	5	5	5	5	5	5	5	5	5
Q9CZ13	22273	Uqcrc1	TRUE	Cytochrome b-c1 complex subunit 1, mitochondrial OS=Mus musculus OX=10090 GN=Uqcrc1 PE=1 SV=2	35	13	86	13	59.976	273.98	13	52.8	8.27634e+06	1.06624e+07	9.26044e+06	9.26044e+06	6.62424e+06	1.97047e+07	1.37415e+07	8.8046e+06	8.87643e+06	3.32503e+07	1.62522e+07	11620497	1.07203e+07	11	11	8	10	13	13	9	10	13	12	11	11	11	11	8	10	13	13	9	10	13	12	11	11
Q8K1M6	74006	Dnm1l	TRUE	Dynamin-1-like protein OS=Mus musculus OX=10090 GN=Dnm1l PE=1 SV=2	20	11	86	11	49.583	245.76	11	82.6	7.82201e+06	2.28117e+07	8.60774e+06	8.60774e+06	7.66652e+06	1.62574e+07	8.88312e+06	1.05875e+07	1.11549e+07	1.01297e+07	1.27085e+07	1.14357e+07	1.06474e+07	9	11	10	9	11	10	8	9	10	10	9	9	9	11	10	9	11	10	8	9	10	10	9	9
O55176	18744	Pja1	FALSE	E3 ubiquitin-protein ligase Praja-1 OS=Mus musculus OX=10090 GN=Pja1 PE=1 SV=3	26	12	86	10	54.927	251.62	12	63.9	5.60401e+06	8.61947e+06	8.70249e+06	8.70249e+06	5.44685e+06	4.24332e+06	3.5456e+06	7.2557e+06	8.57999e+06	5.95978e+06	4.77743e+06	7.31762e+06	5.18672e+06	10	11	10	11	10	10	12	12	10	10	12	11	9	10	9	9	9	9	10	10	8	8	10	9
Q80WR5	97159	A430005L14Rik	FALSE	UPF0688 protein C1orf174 homolog OS=Mus musculus OX=10090 PE=1 SV=1	65	9	86	9	43.531	240.71	9	24.8	5.53416e+06	8.86485e+06	1.09411e+07	1.09411e+07	6.25221e+06	8.38955e+06	5.24921e+06	8.45141e+06	8.07481e+06	7.78385e+06	7.89821e+06	9.31123e+06	8.82747e+06	8	8	7	7	7	8	9	8	7	8	8	8	8	8	7	7	7	8	9	8	7	8	8	8
Q9DB29	67732	Iah1	FALSE	Isoamyl acetate-hydrolyzing esterase 1 homolog OS=Mus musculus OX=10090 GN=Iah1 PE=1 SV=1	65	11	86	11	65.063	243.21	11	28	1.02322e+07	1.4662e+07	3.88253e+06	3.88253e+06	1.54956e+07	3.35242e+07	3.83534e+07	3.44072e+06	4.84945e+06	4.10261e+07	3.27151e+07	4.59066e+06	1.32024e+07	7	8	5	8	10	11	5	7	11	10	6	9	7	8	5	8	10	11	5	7	11	10	6	9
Q69ZS7	56422	Hbs1l	FALSE	HBS1-like protein OS=Mus musculus OX=10090 GN=Hbs1l PE=1 SV=2	16	8	86	8	44.316	275.9	8	75.1	8.42977e+06	19313722	1.03578e+07	1.03578e+07	8.98304e+06	1.09132e+07	7.43797e+06	1.38846e+07	1.14252e+07	6.5853e+06	1.10366e+07	1.94546e+07	1.34401e+07	7	7	7	8	7	7	7	7	7	7	7	7	7	7	7	8	7	7	7	7	7	7	7	7
Q9QYB1	29876	Clic4	FALSE	Chloride intracellular channel protein 4 OS=Mus musculus OX=10090 GN=Clic4 PE=1 SV=3	57	10	86	9	63.042	245.95	10	28.7	3.77029e+06	7.57817e+06	2.78449e+06	2.78449e+06	4.32429e+06	1.22881e+07	8.57825e+06	1.97379e+06	2.47603e+06	1.33671e+07	8.31297e+06	3.47049e+06	4.63315e+06	7	8	4	8	10	10	5	4	10	10	5	9	7	8	4	7	9	9	4	4	9	9	5	8
Q921H9	69893	Coa7	TRUE	Cytochrome c oxidase assembly factor 7 OS=Mus musculus OX=10090 GN=Coa7 PE=1 SV=1	51	9	86	9	37.607	212.68	9	25.6	1.40858e+07	2.22337e+07	1.1177e+07	1.1177e+07	1.51794e+07	2.28018e+07	1.56696e+07	1.61675e+07	1.66042e+07	4.8672e+07	2.4141e+07	1.72492e+07	2.22948e+07	7	6	6	7	7	7	7	7	9	7	7	7	7	6	6	7	7	7	7	7	9	7	7	7
P56183	18114	Rrp1	FALSE	Ribosomal RNA processing protein 1 homolog A OS=Mus musculus OX=10090 GN=Rrp1 PE=1 SV=2	28	8	86	8	37.65	281.72	8	54.7	3.23819e+06	5.46931e+06	4.70986e+06	4.70986e+06	4.09317e+06	4.88397e+06	4.04677e+06	4.07058e+06	4.41877e+06	5.93148e+06	5.88039e+06	4.86745e+06	5.80705e+06	8	7	7	7	7	7	8	7	7	7	8	7	8	7	7	7	7	7	8	7	7	7	8	7
Q9JKF6	58235	Nectin1	FALSE	Nectin-1 OS=Mus musculus OX=10090 GN=Nectin1 PE=1 SV=3	14	7	85	7	37.68	224.8	7	57	6.82611e+06	9.18001e+06	1.16368e+07	1.16368e+07	7.21678e+06	7.98242e+06	5.96527e+06	8.34267e+06	1.09807e+07	8934217	7.70875e+06	1.13891e+07	1.08654e+07	7	7	7	7	7	7	7	7	6	7	7	7	7	7	7	7	7	7	7	7	6	7	7	7
Q8K2H2	72201	Otud6b	FALSE	Deubiquitinase OTUD6B OS=Mus musculus OX=10090 GN=Otud6b PE=1 SV=1	40	8	85	8	39.958	307.61	8	33.7	1.07043e+07	1.6512e+07	1.33207e+07	1.33207e+07	8.5828e+06	9.86936e+06	8.73705e+06	1.04912e+07	1.12142e+07	1.69567e+07	1.20861e+07	8.0636e+06	1.08904e+07	8	8	8	7	8	7	8	8	8	7	7	8	8	8	8	7	8	7	8	8	8	7	7	8
Q9CQM5	52700	Txndc17	FALSE	Thioredoxin domain-containing protein 17 OS=Mus musculus OX=10090 GN=Txndc17 PE=1 SV=1	51	6	85	6	21.801	205.28	6	14	5.59344e+07	1.22649e+08	8.94839e+07	8.94839e+07	8.04769e+07	9.71771e+07	6.90551e+07	6.59489e+07	8.32805e+07	1.04879e+08	8.67515e+07	7.14132e+07	9.03801e+07	6	6	5	5	5	5	5	6	5	6	6	6	6	6	5	5	5	5	5	6	5	6	6	6
Q8BYK6	229096	Ythdf3	FALSE	YTH domain-containing family protein 3 OS=Mus musculus OX=10090 GN=Ythdf3 PE=1 SV=2	12	5	85	5	30.86	251.35	5	63.9	6.66095e+06	1.27007e+07	1.08942e+07	1.08942e+07	6.85312e+06	9.94901e+06	7.94905e+06	9.72123e+06	1.08826e+07	8219011	9.44809e+06	1.01414e+07	8.82816e+06	5	5	5	5	5	5	5	5	5	5	5	5	5	5	5	5	5	5	5	5	5	5	5	5
Q9DCY0	64697	Keg1	FALSE	Glycine N-acyltransferase-like protein Keg1 OS=Mus musculus OX=10090 GN=Keg1 PE=1 SV=1	31	7	85	7	43.664	220.23	7	33.7	1.46752e+07	2.96067e+07	9.03284e+06	9.03284e+06	6.37673e+06	9.19003e+06	9.89249e+06	1.17339e+07	1.35666e+07	4.29403e+07	7.92096e+06	5537124	5.30381e+06	7	7	5	5	7	7	6	7	7	6	5	6	7	7	5	5	7	7	6	7	7	6	5	6
Q9CRB3	76974	Urah	FALSE	5-hydroxyisourate hydrolase OS=Mus musculus OX=10090 GN=Urah PE=1 SV=1	75	6	85	6	28.862	207.46	6	13.6	1.3518e+07	18724363	6.72212e+06	6.72212e+06	2.03851e+07	4.18179e+07	2.60488e+07	5.04652e+06	7.9818e+06	3.70995e+07	3.05543e+07	4.18264e+06	1.65615e+07	6	6	4	6	6	6	5	5	6	6	4	6	6	6	4	6	6	6	5	5	6	6	4	6
Q8BGC0	72459	Htatsf1	FALSE	HIV Tat-specific factor 1 homolog OS=Mus musculus OX=10090 GN=Htatsf1 PE=1 SV=1	18	10	85	10	40.32	199.27	10	86.2	3.53093e+06	5.68362e+06	3.78647e+06	3.78647e+06	3.38631e+06	5.94184e+06	3.77982e+06	4.15292e+06	4.1584e+06	3.79758e+06	4.53186e+06	5.86912e+06	4.98414e+06	9	9	8	8	10	9	9	9	8	9	9	10	9	9	8	8	10	9	9	9	8	9	9	10
Q8CHU3	13855	Epn2	FALSE	Epsin-2 OS=Mus musculus OX=10090 GN=Epn2 PE=1 SV=1	22	9	85	9	35.547	221.74	9	63.4	3.04999e+06	5.25796e+06	5.2858e+06	5.2858e+06	3.79436e+06	4.96833e+06	3.18509e+06	4.20048e+06	3.84643e+06	4.50268e+06	4.27153e+06	4.9215e+06	4.84454e+06	7	9	7	7	6	8	8	9	7	8	8	9	7	9	7	7	6	8	8	9	7	8	8	9
P29595	18002	Nedd8	FALSE	NEDD8 OS=Mus musculus OX=10090 GN=Nedd8 PE=1 SV=2	46	4	85	4	21.638	222.22	4	9	16568364	3.50291e+07	2.20771e+07	2.20771e+07	1.97785e+07	2.9752e+07	2.13648e+07	1.71386e+07	2.32246e+07	4.44094e+07	2.3695e+07	2.06029e+07	2.48423e+07	4	4	4	4	4	4	4	4	4	4	4	4	4	4	4	4	4	4	4	4	4	4	4	4
Q8CCS6	54196	Pabpn1	FALSE	Polyadenylate-binding protein 2 OS=Mus musculus OX=10090 GN=Pabpn1 PE=1 SV=3	56	8	85	8	40.506	232.69	8	32.3	7.60687e+06	1.18418e+07	9.21051e+06	9.21051e+06	6.88668e+06	1.02758e+07	6.14642e+06	8.15234e+06	8.18743e+06	1.06787e+07	9.48983e+06	6.21535e+06	7.94568e+06	8	6	6	7	7	7	8	8	8	7	6	7	8	6	6	7	7	7	8	8	8	7	6	7
Q8QZT1	110446	Acat1	TRUE	Acetyl-CoA acetyltransferase, mitochondrial OS=Mus musculus OX=10090 GN=Acat1 PE=1 SV=1	25	8	85	8	43.602	286.08	8	44.8	1.11744e+07	1.53534e+07	1.33577e+07	1.33577e+07	1.37247e+07	2.3221e+07	1.69713e+07	1.05675e+07	1.03923e+07	3.13222e+07	1.81009e+07	1.79518e+07	1.99752e+07	8	7	6	8	7	8	8	8	8	7	8	8	8	7	6	8	7	8	8	8	8	7	8	8
P14824	11749	Anxa6	FALSE	Annexin A6 OS=Mus musculus OX=10090 GN=Anxa6 PE=1 SV=3	21	13	84	12	55.803	209.25	13	75.8	2.46343e+06	6.21574e+06	3.7131e+06	3.7131e+06	4.23647e+06	9.85259e+06	8.10318e+06	2.43827e+06	2.62096e+06	8.1439e+06	8.06271e+06	5.43822e+06	7.12863e+06	7	10	9	10	13	13	8	8	11	11	8	12	6	9	8	9	12	12	7	7	10	10	8	11
Q61768	16573	Kif5b	FALSE	Kinesin-1 heavy chain OS=Mus musculus OX=10090 GN=Kif5b PE=1 SV=3	13	10	84	10	37.845	223.04	10	109.5	2.06334e+06	5.09599e+06	2.88195e+06	2.88195e+06	2.25412e+06	3.41686e+06	2.19108e+06	2.7087e+06	2.63487e+06	2.74777e+06	3.01563e+06	4.06939e+06	2.7601e+06	7	8	8	8	8	7	7	7	8	8	8	7	7	8	8	8	8	7	7	7	8	8	8	7
Q99LT0	66310	Dpy30	FALSE	Protein dpy-30 homolog OS=Mus musculus OX=10090 GN=Dpy30 PE=1 SV=1	77	5	84	5	37.913	283.94	5	11.2	3.07395e+07	4.44762e+07	5.77257e+07	5.77257e+07	3.4296e+07	4.41041e+07	2.53068e+07	4.18434e+07	4.74129e+07	3.45314e+07	3.90723e+07	5.00225e+07	4.57457e+07	5	5	5	5	5	5	5	5	5	5	5	5	5	5	5	5	5	5	5	5	5	5	5	5
Q9CXN7	67307	Pbld2	FALSE	Phenazine biosynthesis-like domain-containing protein 2 OS=Mus musculus OX=10090 GN=Pbld2 PE=1 SV=1	33	10	84	5	39.138	197.49	10	32	5.03347e+06	6.49161e+06	3.99102e+06	3.99102e+06	6.54819e+06	1.31776e+07	8.33957e+06	4.17214e+06	4.03737e+06	1.24124e+07	8.51631e+06	4.01484e+06	6.29201e+06	8	8	5	9	10	10	8	8	10	10	8	9	3	3	0	4	5	5	3	3	5	5	3	4
P35569	16367	Irs1	FALSE	Insulin receptor substrate 1 OS=Mus musculus OX=10090 GN=Irs1 PE=1 SV=1	15	11	84	11	51.354	233.08	11	130.6	2.02955e+06	3.42927e+06	3.75792e+06	3.75792e+06	2.73913e+06	2.88002e+06	2.15483e+06	3.02609e+06	3.37965e+06	2.1768e+06	1.86852e+06	3.74717e+06	3.64824e+06	9	8	8	8	6	9	9	8	5	7	9	9	9	8	8	8	6	9	9	8	5	7	9	9
P14152	17449	Mdh1	FALSE	Malate dehydrogenase, cytoplasmic OS=Mus musculus OX=10090 GN=Mdh1 PE=1 SV=3	32	8	84	8	41.982	225.4	8	36.5	1.63961e+07	2.39904e+07	1.96388e+07	1.96388e+07	1.76028e+07	2.80505e+07	2.11863e+07	1.90904e+07	1.63295e+07	2.88475e+07	2.55903e+07	1.82717e+07	2.30862e+07	7	5	5	7	7	8	6	5	7	7	5	6	7	5	5	7	7	8	6	5	7	7	5	6
O70493	55988	Snx12	FALSE	Sorting nexin-12 OS=Mus musculus OX=10090 GN=Snx12 PE=1 SV=1	56	8	84	6	26.842	203.11	8	19.1	2.97817e+06	3.24691e+06	2.95192e+06	2.95192e+06	4.73448e+06	9.25683e+06	6.11235e+06	1.69686e+06	2.59633e+06	7.25659e+06	8.35734e+06	1.78641e+06	5.29677e+06	6	5	5	6	7	6	6	6	6	8	6	7	4	3	3	4	5	4	4	4	4	6	4	5
Q76MZ3	51792	Ppp2r1a	FALSE	Serine/threonine-protein phosphatase 2A 65 kDa regulatory subunit A alpha isoform OS=Mus musculus OX=10090 GN=Ppp2r1a PE=1 SV=3	44	20	84	20	89.544	241.64	20	65.3	3.77218e+06	5.80857e+06	3.07175e+06	3.07175e+06	5.09524e+06	1.13745e+07	1.67438e+07	2.33797e+06	2.28656e+06	3.52481e+07	8.90783e+06	3.0767e+06	3.57156e+06	11	13	7	14	14	17	6	8	20	15	6	10	11	13	7	14	14	17	6	8	20	15	6	10
P40124	12331	Cap1	FALSE	Adenylyl cyclase-associated protein 1 OS=Mus musculus OX=10090 GN=Cap1 PE=1 SV=4	35	10	84	10	46.107	288.49	10	51.5	5.10755e+06	1.30226e+07	1.03005e+07	1.03005e+07	6.45296e+06	1.26289e+07	8.12522e+06	4.04525e+06	8.09683e+06	8.00602e+06	7.44216e+06	6.64288e+06	1.0196e+07	7	9	7	9	10	10	6	9	7	8	8	10	7	9	7	9	10	10	6	9	7	8	8	10
P18608	15312	Hmgn1	FALSE	Non-histone chromosomal protein HMG-14 OS=Mus musculus OX=10090 GN=Hmgn1 PE=1 SV=2	53	4	84	4	18.102	238.56	4	10.1	2.31151e+06	4.55317e+06	7.61373e+06	7.61373e+06	4.71538e+06	6.1269e+06	2.88753e+06	4.30057e+06	4.53006e+06	4.00458e+06	3.5654e+06	4.38822e+06	5.11952e+06	4	3	4	4	4	4	4	4	4	4	4	4	4	3	4	4	4	4	4	4	4	4	4	4
Q8K0V4	232791	Cnot3	FALSE	CCR4-NOT transcription complex subunit 3 OS=Mus musculus OX=10090 GN=Cnot3 PE=1 SV=1	11	8	84	8	32.107	200.72	8	81.9	3.79199e+06	5.9639e+06	9.77668e+06	9.77668e+06	3.82911e+06	3.72921e+06	2.71553e+06	5.81928e+06	6.81525e+06	4.35843e+06	5.87842e+06	8.5744e+06	4.40593e+06	6	7	8	7	7	7	7	7	7	7	8	7	6	7	8	7	7	7	7	7	7	7	8	7
P05202	14719	Got2	TRUE	Aspartate aminotransferase, mitochondrial OS=Mus musculus OX=10090 GN=Got2 PE=1 SV=1	24	8	84	8	30.517	254.34	8	47.4	5.37585e+06	8.25579e+06	5.79567e+06	5.79567e+06	5.31468e+06	9.9878e+06	5.75101e+06	6.00103e+06	8.72297e+06	1.36212e+07	7.68538e+06	8.21701e+06	6.50544e+06	8	8	7	7	7	6	6	7	8	7	8	8	8	8	7	7	7	6	6	7	8	7	8	8
Q9CQM9	30926	Glrx3	FALSE	Glutaredoxin-3 OS=Mus musculus OX=10090 GN=Glrx3 PE=1 SV=1	34	8	83	8	36.895	269.54	8	37.8	6.42227e+06	1.36846e+07	7.19963e+06	7.19963e+06	9.73547e+06	16064000	1.39012e+07	3.84707e+06	5.86598e+06	2.05693e+07	1.39591e+07	5162671	9.11059e+06	6	7	6	7	7	7	6	7	8	6	5	7	6	7	6	7	7	7	6	7	8	6	5	7
O88271	23837	Cfdp1	FALSE	Craniofacial development protein 1 OS=Mus musculus OX=10090 GN=Cfdp1 PE=1 SV=1	31	8	83	8	44.618	231.51	8	32.9	8.36627e+06	1.61142e+07	1.97923e+07	1.97923e+07	1.21123e+07	1.37974e+07	1.10976e+07	1.54673e+07	1.68162e+07	1.57497e+07	1.3087e+07	1.97748e+07	1.75752e+07	8	8	8	8	8	8	8	8	8	8	8	8	8	8	8	8	8	8	8	8	8	8	8	8
Q9D1H6	68493	Ndufaf4	TRUE	NADH dehydrogenase [ubiquinone] 1 alpha subcomplex assembly factor 4 OS=Mus musculus OX=10090 GN=Ndufaf4 PE=1 SV=1	45	8	83	8	31.699	207.92	8	20.1	6.16233e+06	1.2124e+07	4.67891e+06	4.67891e+06	4.60598e+06	6.64954e+06	5.61283e+06	7.19786e+06	5.30962e+06	2.37259e+07	9.81975e+06	5.52322e+06	6.35403e+06	8	8	8	8	7	8	8	8	8	8	8	8	8	8	8	8	7	8	8	8	8	8	8	8
Q8K3X4	238330	Irf2bpl	FALSE	Probable E3 ubiquitin-protein ligase IRF2BPL OS=Mus musculus OX=10090 GN=Irf2bpl PE=1 SV=1	17	9	83	8	37.283	222.36	9	80.5	1.99347e+06	3.2411e+06	2.22386e+06	2.22386e+06	1.95727e+06	2.17455e+06	1.59191e+06	2.07827e+06	2.10904e+06	2.53107e+06	2.45173e+06	2.12561e+06	2.37253e+06	6	6	6	8	7	8	8	8	6	7	9	8	6	6	6	7	6	7	8	7	6	7	8	7
Q8K2K6	15463	Agfg1	FALSE	Arf-GAP domain and FG repeat-containing protein 1 OS=Mus musculus OX=10090 GN=Agfg1 PE=1 SV=2	20	7	83	7	42.337	262.46	7	58	6.46238e+06	1.09633e+07	1.50642e+07	1.50642e+07	7.56107e+06	1.03029e+07	5.96655e+06	9.04402e+06	9.95934e+06	7.93272e+06	7.21847e+06	9.64485e+06	8.47346e+06	7	7	6	7	7	7	7	7	7	7	7	7	7	7	6	7	7	7	7	7	7	7	7	7
Q922D4	52036	Ppp6r3	FALSE	Serine/threonine-protein phosphatase 6 regulatory subunit 3 OS=Mus musculus OX=10090 GN=Ppp6r3 PE=1 SV=1	25	20	83	20	71.676	224.35	20	94.6	4.83356e+06	7.16769e+06	3.38878e+06	3.38878e+06	5.38627e+06	8.64817e+06	7.06882e+06	3.18203e+06	3.22113e+06	1.43294e+07	6.70827e+06	3.87637e+06	5.05618e+06	15	16	10	15	16	15	10	12	19	16	9	14	15	16	10	15	16	15	10	12	19	16	9	14
Q6PH08	238988	Erc2	FALSE	ERC protein 2 OS=Mus musculus OX=10090 GN=Erc2 PE=1 SV=2	7	7	83	1	25.96	188.35	7	110.6	587465	1.02628e+06	743260	743260	497550	683288	351708	546555	501890	607101	476843	638276	507065	7	7	7	7	7	7	7	7	7	7	7	7	1	1	1	1	1	1	1	1	1	1	1	1
Q8BGT7	76479	Smndc1	FALSE	Survival of motor neuron-related-splicing factor 30 OS=Mus musculus OX=10090 GN=Smndc1 PE=1 SV=1	41	8	83	8	35.289	259.99	8	26.7	6.99978e+06	1.37612e+07	1.379e+07	1.379e+07	8.92265e+06	1.22562e+07	7.53063e+06	1.20416e+07	1.32947e+07	1.09596e+07	1.20082e+07	1.3958e+07	1.34991e+07	8	8	8	8	7	8	8	8	8	7	8	8	8	8	8	8	7	8	8	8	8	7	8	8
Q9DBB9	71756	Cpn2	FALSE	Carboxypeptidase N subunit 2 OS=Mus musculus OX=10090 GN=Cpn2 PE=1 SV=2	26	12	83	12	42.976	210.77	12	60.4	8527856	7.18163e+06	3.38817e+06	3.38817e+06	5.63493e+06	9.91678e+06	5.86486e+06	2.82245e+06	3.0662e+06	8.91416e+06	7.24114e+06	2.28128e+06	4.00677e+06	12	11	8	11	11	12	10	11	11	12	10	11	12	11	8	11	11	12	10	11	11	12	10	11
Q60876	13685	Eif4ebp1	FALSE	Eukaryotic translation initiation factor 4E-binding protein 1 OS=Mus musculus OX=10090 GN=Eif4ebp1 PE=1 SV=3	81	5	82	5	22.66	211.33	5	12.3	2.59359e+06	2.58237e+06	3.96129e+06	3.96129e+06	2.32357e+06	2.12126e+06	1.17726e+06	4.48894e+06	5.36587e+06	3.11351e+06	1.64589e+06	2.10345e+06	2.23213e+06	5	4	5	4	4	4	5	5	4	5	5	5	5	4	5	4	4	4	5	5	4	5	5	5
O55003	12176	Bnip3	TRUE	BCL2/adenovirus E1B 19 kDa protein-interacting protein 3 OS=Mus musculus OX=10090 GN=Bnip3 PE=1 SV=1	39	7	82	7	34.374	208.08	7	21	1.75489e+07	4.18817e+07	3.54629e+07	3.54629e+07	2.73194e+07	3.75482e+07	2.22057e+07	32511439	2.34892e+07	3.76134e+07	3.37403e+07	3.51942e+07	2.7598e+07	7	7	6	7	6	6	7	7	7	7	7	7	7	7	6	7	6	6	7	7	7	7	7	7
Q9Z2V4	18534	Pck1	FALSE	Phosphoenolpyruvate carboxykinase, cytosolic [GTP] OS=Mus musculus OX=10090 GN=Pck1 PE=1 SV=1	15	8	82	8	32.807	209.68	8	69.3	1.00325e+07	2.02306e+07	1.5134e+07	1.5134e+07	8.42927e+06	2.15746e+07	9.20497e+06	1.00791e+07	1.08938e+07	1.10821e+07	1.33679e+07	8.23157e+06	1.02583e+07	7	8	8	8	8	7	8	8	7	7	7	8	7	8	8	8	8	7	8	8	7	7	7	8
P41216	14081	Acsl1	TRUE	Long-chain-fatty-acid--CoA ligase 1 OS=Mus musculus OX=10090 GN=Acsl1 PE=1 SV=2	10	6	82	6	23.577	216.49	6	77.9	6.60549e+06	1.56649e+07	1.54302e+07	1.54302e+07	7.3312e+06	10198432	5.06001e+06	1.03906e+07	8.79523e+06	1.11016e+07	5.26353e+06	1.2469e+07	5.48751e+06	6	6	6	6	6	6	6	6	6	6	6	6	6	6	6	6	6	6	6	6	6	6	6	6
P84089	13877	Erh	FALSE	Enhancer of rudimentary homolog OS=Mus musculus OX=10090 GN=Erh PE=1 SV=1	46	5	82	5	23.538	211.14	5	12.3	3.20398e+07	6.71912e+07	3.92401e+07	3.92401e+07	3.62283e+07	6.21048e+07	3.93278e+07	3.38544e+07	4.08356e+07	6.31602e+07	4.79936e+07	2.94757e+07	4.95457e+07	4	4	4	4	4	4	4	5	5	5	5	4	4	4	4	4	4	4	4	5	5	5	5	4
Q9R0M6	56382	Rab9	FALSE	Ras-related protein Rab-9A OS=Mus musculus OX=10090 GN=Rab9a PE=1 SV=1	40	6	82	6	28.137	254.55	6	22.9	8.89104e+06	10646558	6.46543e+06	6.46543e+06	8.28748e+06	1.51471e+07	1.16235e+07	5.03e+06	6.37104e+06	1.62828e+07	1.26677e+07	4.34164e+06	8.88938e+06	6	6	5	6	6	6	5	6	6	6	6	6	6	6	5	6	6	6	5	6	6	6	6	6
Q9R020	53861	Zranb2	FALSE	Zinc finger Ran-binding domain-containing protein 2 OS=Mus musculus OX=10090 GN=Zranb2 PE=1 SV=2	36	11	82	11	46.784	181.16	11	37.3	5.16536e+07	8.23321e+07	5.16758e+07	5.16758e+07	5.11778e+07	6.34303e+07	5.72865e+07	5.37658e+07	5.56796e+07	7.31891e+07	7.48498e+07	6.92782e+07	7.28534e+07	8	9	8	9	9	9	8	8	10	8	8	8	8	9	8	9	9	9	8	8	10	8	8	8
Q9CZS1	72535	Aldh1b1	TRUE	Aldehyde dehydrogenase X, mitochondrial OS=Mus musculus OX=10090 GN=Aldh1b1 PE=1 SV=1	35	15	82	14	56.779	221.42	15	57.5	5.31652e+06	4.70796e+06	4.15899e+06	4.15899e+06	7.86862e+06	1.96215e+07	1.41379e+07	4.23178e+06	4.32212e+06	14166441	1.38354e+07	8.49924e+06	1.12543e+07	11	9	7	11	14	15	9	8	11	14	9	13	10	8	6	10	13	14	8	8	10	13	8	12
Q8K012	214459	Fnbp1l	FALSE	Formin-binding protein 1-like OS=Mus musculus OX=10090 GN=Fnbp1l PE=1 SV=2	32	15	82	15	56.1	218.43	15	69.8	5600328	6.16818e+06	6.12007e+06	6.12007e+06	3.4164e+06	4.50073e+06	2.96901e+06	6.08259e+06	7.17322e+06	5.50228e+06	5.68166e+06	6.03767e+06	6.13276e+06	14	12	12	12	10	11	14	14	12	13	14	14	14	12	12	12	10	11	14	14	12	13	14	14
Q8R035	68572	Mrpl58	TRUE	Peptidyl-tRNA hydrolase ICT1, mitochondrial OS=Mus musculus OX=10090 GN=Mrpl58 PE=1 SV=1	36	7	82	7	26.528	220.71	7	23.5	8.30879e+06	1.24683e+07	7.14495e+06	7.14495e+06	5.93741e+06	8.36879e+06	5.60749e+06	1.072e+07	9.72551e+06	2.34642e+07	1.01776e+07	1.07453e+07	8.06597e+06	7	7	6	7	7	7	7	7	7	7	7	7	7	7	6	7	7	7	7	7	7	7	7	7
P03953	11537	Cfd	FALSE	Complement factor D OS=Mus musculus OX=10090 GN=Cfd PE=1 SV=1	40	6	82	6	25.391	226.17	6	28	5.82693e+06	5.42952e+06	1.03243e+07	1.03243e+07	6.10611e+06	1.41083e+07	6.83876e+06	4.70332e+06	6.30093e+06	4.15622e+06	1.51023e+07	1.80094e+07	1.76707e+07	5	5	4	5	6	5	5	5	4	6	6	6	5	5	4	5	6	5	5	5	4	6	6	6
Q91V08	93694	Clec2d	FALSE	C-type lectin domain family 2 member D OS=Mus musculus OX=10090 GN=Clec2d PE=1 SV=1	35	6	81	6	30.955	213.09	6	23.6	6.72962e+06	9.26575e+06	5.55977e+06	5.55977e+06	4.28259e+06	8.42265e+06	4.45114e+06	5.71174e+06	5.50361e+06	7.41083e+06	7.26129e+06	3.46928e+06	6.57069e+06	5	5	5	5	5	5	5	5	5	6	5	5	5	5	5	5	5	5	5	5	5	6	5	5
Q64012	19383	Raly	FALSE	RNA-binding protein Raly OS=Mus musculus OX=10090 GN=Raly PE=1 SV=3	30	6	81	6	29.278	223.13	6	33.2	4.48898e+06	1.31523e+07	7.29445e+06	7.29445e+06	6.75241e+06	1.60819e+07	4.58077e+06	8.12211e+06	7.98141e+06	2.9535e+06	1.06141e+07	1.10921e+07	8.48905e+06	6	6	6	5	6	5	6	6	4	6	6	5	6	6	6	5	6	5	6	6	4	6	6	5
B2RY56	67039	Rbm25	FALSE	RNA-binding protein 25 OS=Mus musculus OX=10090 GN=Rbm25 PE=1 SV=2	15	10	81	10	42.801	219.65	10	99.5	1.35864e+07	4.10635e+07	7.91643e+07	7.91643e+07	3.7627e+07	6.13998e+07	3.00547e+07	3.62457e+07	3.70222e+07	3.11927e+07	3.93559e+07	4.14726e+07	3.20462e+07	8	8	7	8	8	8	8	8	7	8	8	9	8	8	7	8	8	8	8	8	7	8	8	9
Q9R1K9	26370	Cetn2	FALSE	Centrin-2 OS=Mus musculus OX=10090 GN=Cetn2 PE=1 SV=1	68	8	81	8	41.929	255.06	8	19.8	2.38764e+06	7.44695e+06	6.14702e+06	6.14702e+06	4.24026e+06	5.75632e+06	3.26182e+06	5.14993e+06	6.25225e+06	4.53716e+06	5.51685e+06	7.6248e+06	6.65352e+06	7	8	8	8	8	8	8	8	8	7	8	7	7	8	8	8	8	8	8	8	8	7	8	7
Q7TQG1	240753	Plekha6	FALSE	Pleckstrin homology domain-containing family A member 6 OS=Mus musculus OX=10090 GN=Plekha6 PE=1 SV=1	11	8	81	8	36.104	218	8	131.3	3.1692e+06	7.5503e+06	5.05668e+06	5.05668e+06	4.60214e+06	7.00952e+06	4.44276e+06	6.6463e+06	5.13161e+06	3.09928e+06	6.1205e+06	8.16555e+06	6.99013e+06	8	7	7	8	8	8	8	8	6	8	8	8	8	7	7	8	8	8	8	8	6	8	8	8
O70404	22320	Vamp8	FALSE	Vesicle-associated membrane protein 8 OS=Mus musculus OX=10090 GN=Vamp8 PE=1 SV=1	45	5	81	5	27.965	201.24	5	11.4	2.37662e+07	4.38554e+07	4.7309e+07	4.7309e+07	2.50097e+07	3.38552e+07	2.20508e+07	3.24941e+07	3.82766e+07	3.54408e+07	3.16141e+07	3.51067e+07	3.40267e+07	5	5	5	5	5	5	5	5	5	5	5	5	5	5	5	5	5	5	5	5	5	5	5	5
P40237	12521	Cd82	FALSE	CD82 antigen OS=Mus musculus OX=10090 GN=Cd82 PE=1 SV=1	20	5	81	5	27.799	208.62	5	29.6	1.7076e+07	2.45032e+07	3.74334e+07	3.74334e+07	2.22632e+07	2.75389e+07	1.68387e+07	2.13593e+07	2.32339e+07	2.9891e+07	2.62325e+07	1.78626e+07	3.20398e+07	5	5	5	5	5	5	5	5	5	5	5	5	5	5	5	5	5	5	5	5	5	5	5	5
Q9Z1Q5	114584	Clic1	FALSE	Chloride intracellular channel protein 1 OS=Mus musculus OX=10090 GN=Clic1 PE=1 SV=3	59	11	81	11	41.508	205.57	11	27	4.67016e+06	6.65386e+06	2.24199e+06	2.24199e+06	6.92953e+06	1.26022e+07	1.19907e+07	2.30824e+06	2.58397e+06	1.35781e+07	9.94892e+06	1.78747e+06	5.90541e+06	7	8	4	10	10	11	5	6	8	9	4	8	7	8	4	10	10	11	5	6	8	9	4	8
Q6NVF9	432508	Cpsf6	FALSE	Cleavage and polyadenylation specificity factor subunit 6 OS=Mus musculus OX=10090 GN=Cpsf6 PE=1 SV=1	14	6	81	6	40.41	210.32	6	59.1	9.24893e+06	18351314	1.25502e+07	1.25502e+07	9.22517e+06	1.58057e+07	9.04411e+06	1.27259e+07	1.32985e+07	9.83092e+06	1.03618e+07	1.48959e+07	1.19712e+07	6	6	6	6	6	6	6	6	6	6	6	6	6	6	6	6	6	6	6	6	6	6	6	6
Q9QZ85	60440	Iigp1	FALSE	Interferon-inducible GTPase 1 OS=Mus musculus OX=10090 GN=Iigp1 PE=1 SV=2	21	8	81	8	38.148	232.26	8	47.5	3.86087e+06	8.40692e+06	4.00522e+06	4.00522e+06	1.36049e+06	1.3226e+06	1.17267e+06	5.95084e+06	1.01554e+07	2514587	1.31737e+06	4.38703e+06	5.00479e+06	8	8	8	6	5	6	8	8	6	5	8	8	8	8	8	6	5	6	8	8	6	5	8	8
B1AZP2	228836	Dlgap4	FALSE	Disks large-associated protein 4 OS=Mus musculus OX=10090 GN=Dlgap4 PE=1 SV=1	11	10	81	10	39.216	198.55	10	108	9.72674e+06	1.67437e+07	1.99772e+07	1.99772e+07	1.08241e+07	1.36897e+07	7.65538e+06	1.49228e+07	1.92117e+07	1.44359e+07	9.54178e+06	1.73052e+07	1.46001e+07	8	7	7	7	7	7	7	8	7	6	7	7	8	7	7	7	7	7	7	8	7	6	7	7
Q9CR68	66694	Uqcrfs1	TRUE	Cytochrome b-c1 complex subunit Rieske, mitochondrial OS=Mus musculus OX=10090 GN=Uqcrfs1 PE=1 SV=1	28	7	81	7	27.285	234.76	7	29.3	4.40795e+07	1.05936e+08	8.45561e+07	8.45561e+07	4.70477e+07	7.92674e+07	6.17032e+07	9.3096e+07	7.78951e+07	2.21091e+08	7.02435e+07	1.15228e+08	8.95118e+07	6	6	5	7	6	6	6	7	7	6	6	6	6	6	5	7	6	6	6	7	7	6	6	6
Q6ZPJ0	21763	Tex2	FALSE	Testis-expressed protein 2 OS=Mus musculus OX=10090 GN=Tex2 PE=1 SV=2	16	9	81	9	44.205	209.08	9	125.1	3.42087e+06	6.3644e+06	5.23891e+06	5.23891e+06	3.92112e+06	3.70842e+06	2.54459e+06	4.52776e+06	5.50504e+06	2.97688e+06	3.41521e+06	6.66681e+06	4.66372e+06	8	8	8	8	8	7	8	8	7	8	9	7	8	8	8	8	8	7	8	8	7	8	9	7
Q8C3W1	69551	2310022B05Rik	FALSE	Uncharacterized protein C1orf198 homolog OS=Mus musculus OX=10090 PE=1 SV=1	58	11	81	11	49.606	232.75	11	35.3	3.90107e+06	4.47561e+06	5.40487e+06	5.40487e+06	3.61454e+06	3.12843e+06	2.92983e+06	5.22375e+06	4.35036e+06	4.41592e+06	2.74548e+06	6.02363e+06	3.70083e+06	9	7	9	9	7	9	10	9	8	6	10	6	9	7	9	9	7	9	10	9	8	6	10	6
Q63810	19058	Ppp3r1	FALSE	Calcineurin subunit B type 1 OS=Mus musculus OX=10090 GN=Ppp3r1 PE=1 SV=3	68	8	81	8	42.34	261.33	8	19.3	4.40452e+06	1.02023e+07	1.13423e+07	1.13423e+07	7.25858e+06	9.43211e+06	6.50797e+06	7.5998e+06	8.66205e+06	9.49644e+06	7.66516e+06	1.20931e+07	1.08544e+07	7	6	7	7	7	7	7	8	8	7	7	7	7	6	7	7	7	7	7	8	8	7	7	7
Q9CQB5	67006	Cisd2	FALSE	CDGSH iron-sulfur domain-containing protein 2 OS=Mus musculus OX=10090 GN=Cisd2 PE=1 SV=1	50	7	80	7	28.326	200.42	7	15.2	2.1001e+07	4.3231e+07	3.07551e+07	3.07551e+07	2.39364e+07	3.22498e+07	2.34373e+07	2.99363e+07	3.32382e+07	4.7041e+07	3.84946e+07	3.69867e+07	3.85115e+07	7	6	6	6	6	6	6	6	6	6	6	6	7	6	6	6	6	6	6	6	6	6	6	6
Q9EP89	80907	Lactb	TRUE	Serine beta-lactamase-like protein LACTB, mitochondrial OS=Mus musculus OX=10090 GN=Lactb PE=1 SV=1	17	8	80	8	31.938	214.04	8	60.7	5.48356e+06	7.53929e+06	4.31766e+06	4.31766e+06	3.38115e+06	5.43886e+06	4.21793e+06	6.13111e+06	5.6891e+06	1.17098e+07	4.98747e+06	5.10319e+06	6.02945e+06	8	8	8	7	8	8	8	8	8	8	8	8	8	8	8	7	8	8	8	8	8	8	8	8
Q8VE97	57317	Srsf4	FALSE	Serine/arginine-rich splicing factor 4 OS=Mus musculus OX=10090 GN=Srsf4 PE=2 SV=1	14	7	80	4	27.016	192.49	7	55.9	6.74063e+06	8.22944e+06	5.42969e+06	5.42969e+06	4.16696e+06	9.32189e+06	5.14154e+06	4.17387e+06	5.37374e+06	1.23358e+07	7.05767e+06	2.84491e+06	2.66697e+06	7	7	7	7	7	7	7	7	7	7	7	7	4	4	4	4	4	4	4	4	4	4	4	4
Q9JHS9	66070	Cwc15	FALSE	Spliceosome-associated protein CWC15 homolog OS=Mus musculus OX=10090 GN=Cwc15 PE=1 SV=1	40	10	80	10	39.519	213.39	10	26.6	7.45205e+06	1.55509e+07	1.95821e+07	1.95821e+07	1.08061e+07	1.6363e+07	8.98421e+06	1.3359e+07	1.62156e+07	1.34441e+07	1.07591e+07	1.41255e+07	1.48169e+07	7	8	8	9	9	7	8	8	8	7	8	8	7	8	8	9	9	7	8	8	8	7	8	8
O55131	235072	Septin7	FALSE	Septin-7 OS=Mus musculus OX=10090 GN=Septin7 PE=1 SV=1	10	7	80	7	24.468	179.77	7	50.5	3.68171e+06	1.26768e+07	7.99569e+06	7.99569e+06	4.4924e+06	1.07778e+07	4.67859e+06	7.25982e+06	9.77852e+06	4.39724e+06	7.05999e+06	9.2558e+06	1.09734e+07	6	7	7	7	7	7	6	7	7	7	7	7	6	7	7	7	7	7	6	7	7	7	7	7
Q8VHR5	229542	Gatad2b	FALSE	Transcriptional repressor p66-beta OS=Mus musculus OX=10090 GN=Gatad2b PE=1 SV=1	15	7	80	7	35.364	228.49	7	65.4	3.37886e+06	6.5586e+06	5.61908e+06	5.61908e+06	3.94016e+06	6.25478e+06	3.29178e+06	5.04303e+06	5.2538e+06	3.93984e+06	4.32083e+06	5.49991e+06	5.58217e+06	7	7	7	7	7	7	7	7	7	7	7	7	7	7	7	7	7	7	7	7	7	7	7	7
Q3V3R4	109700	Itga1	FALSE	Integrin alpha-1 OS=Mus musculus OX=10090 GN=Itga1 PE=1 SV=2	11	13	80	13	40.209	195.15	13	130.7	7.5503e+06	8.41651e+06	6.52149e+06	6.52149e+06	9.93907e+06	1.63937e+07	1.03481e+07	7.209e+06	6.27863e+06	1.53587e+07	1.23202e+07	6.14813e+06	9.35365e+06	12	11	12	12	12	12	8	11	12	13	8	12	12	11	12	12	12	12	8	11	12	13	8	12
Q8BHN1	353170	Txlng	FALSE	Gamma-taxilin OS=Mus musculus OX=10090 GN=Txlng PE=1 SV=1	33	13	80	13	47.691	202.6	13	60.3	5.79891e+06	8.49154e+06	7.5822e+06	7.5822e+06	4.17749e+06	4.92468e+06	4.06274e+06	4.09754e+06	5.5358e+06	7.91074e+06	5.57366e+06	4.60906e+06	6.11793e+06	13	11	13	12	11	11	12	12	12	12	13	12	13	11	13	12	11	11	12	12	12	12	13	12
Q9JII6	58810	Akr1a1	FALSE	Aldo-keto reductase family 1 member A1 OS=Mus musculus OX=10090 GN=Akr1a1 PE=1 SV=3	34	10	79	10	36.246	202.27	10	36.6	5.27637e+06	1.12374e+07	5.89444e+06	5.89444e+06	6.63522e+06	1.30631e+07	7.97278e+06	5.23135e+06	6.49654e+06	1.51989e+07	9.02975e+06	5.2948e+06	7.18709e+06	9	9	7	10	10	10	8	9	10	10	7	9	9	9	7	10	10	10	8	9	10	10	7	9
Q61210	16801	Arhgef1	FALSE	Rho guanine nucleotide exchange factor 1 OS=Mus musculus OX=10090 GN=Arhgef1 PE=1 SV=2	15	9	79	9	42.74	214.75	9	102.7	3252724	6.73153e+06	2.08876e+06	2.08876e+06	2.63977e+06	4.08501e+06	3.64184e+06	2.45282e+06	3.00621e+06	4.13086e+06	4.25877e+06	2.22086e+06	3.75241e+06	8	9	7	9	9	8	8	8	7	7	9	8	8	9	7	9	9	8	8	8	7	7	9	8
Q8R086	211389	Suox	TRUE	Sulfite oxidase, mitochondrial OS=Mus musculus OX=10090 GN=Suox PE=1 SV=2	32	10	79	10	49.921	226.79	10	60.7	4.79321e+06	5.90565e+06	3.97542e+06	3.97542e+06	5.77069e+06	1.02054e+07	6.92656e+06	4.13901e+06	3.51933e+06	8633628	1.12549e+07	7.63165e+06	4.69689e+06	9	6	6	9	8	9	6	7	8	10	7	6	9	6	6	9	8	9	6	7	8	10	7	6
Q61646	15439	Hp	FALSE	Haptoglobin OS=Mus musculus OX=10090 GN=Hp PE=1 SV=1	16	7	79	7	34.152	209.42	7	38.7	2.56868e+07	2.67266e+07	2.6649e+07	2.6649e+07	2.36207e+07	1.28863e+07	15411288	2.64113e+07	3.47867e+07	37284405	1.3482e+07	3.05836e+07	2.01885e+07	5	5	5	5	5	5	5	7	6	5	5	5	5	5	5	5	5	5	5	7	6	5	5	5
P26883	14225	Fkbp1a	FALSE	Peptidyl-prolyl cis-trans isomerase FKBP1A OS=Mus musculus OX=10090 GN=Fkbp1a PE=1 SV=2	72	6	79	6	33.318	220.81	6	11.9	1.43925e+07	26424980	1.82601e+07	1.82601e+07	2.35188e+07	3.80939e+07	2.69269e+07	1.61509e+07	2.03733e+07	4.05147e+07	3.64257e+07	2.37831e+07	2.55233e+07	6	5	5	5	6	6	5	6	6	5	5	6	6	5	5	5	6	6	5	6	6	5	5	6
Q61464	18139	Zfp638	FALSE	Zinc finger protein 638 OS=Mus musculus OX=10090 GN=Znf638 PE=1 SV=2	12	16	79	16	67.308	222.79	16	218	2.88559e+06	7.05794e+06	4.97844e+06	4.97844e+06	2.90888e+06	5.05616e+06	3.05993e+06	4.62049e+06	4.56125e+06	2.20342e+06	3.75957e+06	6.45766e+06	5.7332e+06	12	12	11	10	12	11	12	10	7	9	11	11	12	12	11	10	12	11	12	10	7	9	11	11
Q8CB77	27224	Eloa	FALSE	Elongin-A OS=Mus musculus OX=10090 GN=Eloa PE=1 SV=3	18	11	79	11	47.516	227.58	11	87.1	3.60172e+06	8.425e+06	6.47874e+06	6.47874e+06	4.26842e+06	6.86625e+06	4.12469e+06	6.76405e+06	6.39656e+06	5.12074e+06	4.84374e+06	7.5611e+06	6.00409e+06	10	10	9	9	10	9	11	10	10	10	10	11	10	10	9	9	10	9	11	10	10	10	10	11
Q8R1B4	56347	Eif3c	FALSE	Eukaryotic translation initiation factor 3 subunit C OS=Mus musculus OX=10090 GN=Eif3c PE=1 SV=1	7	8	79	8	31	224.42	8	105.5	1.01749e+07	2.70924e+07	2.23362e+07	2.23362e+07	1.38154e+07	2.73459e+07	8.92271e+06	1.91351e+07	1.99151e+07	1.16053e+07	2.28989e+07	2.09842e+07	1.48658e+07	6	6	6	6	6	5	7	7	6	7	6	6	6	6	6	6	6	5	7	7	6	7	6	6
Q6A0A2	217980	Larp4b	FALSE	La-related protein 4B OS=Mus musculus OX=10090 GN=Larp4b PE=1 SV=2	19	13	79	13	42.575	209	13	81.6	6.16683e+06	1.46785e+07	1.10046e+07	1.10046e+07	5.85376e+06	1.02576e+07	5.35934e+06	1.02696e+07	1.07627e+07	7.53968e+06	6.53733e+06	1.23525e+07	8.87923e+06	11	13	12	10	12	12	12	13	11	10	13	12	11	13	12	10	12	12	12	13	11	10	13	12
Q9CQ75	17991	Ndufa2	TRUE	NADH dehydrogenase [ubiquinone] 1 alpha subcomplex subunit 2 OS=Mus musculus OX=10090 GN=Ndufa2 PE=1 SV=3	56	7	79	7	24.316	145.86	7	10.9	1.81436e+07	3.56137e+07	2.12241e+07	2.12241e+07	1.68478e+07	2.81396e+07	2.45056e+07	7.85151e+06	7.6721e+06	9.45659e+06	1.65361e+07	2.90215e+06	1.39869e+07	7	7	7	7	7	7	7	7	7	7	7	7	7	7	7	7	7	7	7	7	7	7	7	7
Q8VBV7	108679	Cops8	FALSE	COP9 signalosome complex subunit 8 OS=Mus musculus OX=10090 GN=Cops8 PE=1 SV=1	68	8	79	8	39.324	241.66	8	23.2	5.69711e+06	1.12262e+07	4.09659e+06	4.09659e+06	6.65662e+06	1.21608e+07	1.05861e+07	3.15661e+06	4.30712e+06	1.53081e+07	9.64216e+06	3.12006e+06	8.93404e+06	7	7	6	7	7	8	6	7	8	7	6	7	7	7	6	7	7	8	6	7	8	7	6	7
Q6PIU9	102637099	Not Found	FALSE	Uncharacterized protein FLJ45252 homolog OS=Mus musculus OX=10090 PE=1 SV=2	48	10	79	10	43.072	203.95	10	37.7	5.1374e+06	1.12128e+07	9.72133e+06	9.72133e+06	5.95076e+06	8.23884e+06	3.47541e+06	7.83246e+06	8.05681e+06	3.81093e+06	7.98857e+06	1.04073e+07	8.83174e+06	8	8	7	9	7	8	8	8	6	8	9	8	8	8	7	9	7	8	8	8	6	8	9	8
Q5SRX1	216810	Tom1l2	FALSE	TOM1-like protein 2 OS=Mus musculus OX=10090 GN=Tom1l2 PE=1 SV=1	35	16	79	16	56.597	216.46	16	55.6	3.94499e+06	5.57581e+06	5.33596e+06	5.33596e+06	3.41723e+06	5.44022e+06	3.34573e+06	4.15227e+06	5.17397e+06	1.35309e+07	4.70589e+06	3.73388e+06	5.52925e+06	11	11	11	11	11	11	12	11	14	11	10	11	11	11	11	11	11	11	12	11	14	11	10	11
P06797	13039	Ctsl	FALSE	Procathepsin L OS=Mus musculus OX=10090 GN=Ctsl PE=1 SV=2	31	6	79	6	36.318	244.71	6	37.5	4.41334e+06	9.84032e+06	6.20316e+06	6.20316e+06	8.12956e+06	2.39938e+07	9.07552e+06	6.34938e+06	7.64009e+06	1.05062e+07	1.50337e+07	8.11982e+06	1.08198e+07	6	5	5	6	6	6	6	5	5	6	5	6	6	5	5	6	6	6	6	5	5	6	5	6
Q8VE62	218693	Paip1	FALSE	Polyadenylate-binding protein-interacting protein 1 OS=Mus musculus OX=10090 GN=Paip1 PE=1 SV=1	26	9	79	9	33.565	173.84	9	45.7	9.74663e+06	1.70784e+07	5.88971e+06	5.88971e+06	9.53328e+06	1.38987e+07	9.47961e+06	5.32086e+06	6.49845e+06	2.1698e+07	1.4536e+07	3.45646e+06	9.45895e+06	9	9	6	9	9	9	9	9	9	9	8	9	9	9	6	9	9	9	9	9	9	9	8	9
Q08288	17089	Lyar	FALSE	Cell growth-regulating nucleolar protein OS=Mus musculus OX=10090 GN=Lyar PE=1 SV=2	22	9	79	9	41.731	248.39	9	43.7	1.88212e+06	3.793e+06	3.5101e+06	3.5101e+06	1.85629e+06	2.89598e+06	1.58139e+06	2.53816e+06	2.969e+06	2.94979e+06	2.71861e+06	3.26748e+06	2.93566e+06	5	8	9	6	7	5	7	7	8	5	5	7	5	8	9	6	7	5	7	7	8	5	5	7
O55128	20220	Sap18	FALSE	Histone deacetylase complex subunit SAP18 OS=Mus musculus OX=10090 GN=Sap18 PE=1 SV=1	66	10	79	10	33.925	180.7	10	17.6	1.20753e+07	9.11861e+06	5.46955e+06	5.46955e+06	16375725	9.43544e+06	1.18417e+07	1.98417e+07	5.71319e+06	1.01042e+07	6.95954e+06	3.11063e+06	5.65938e+06	9	9	8	9	9	9	9	9	9	9	8	9	9	9	8	9	9	9	9	9	9	9	8	9
Q9CQI3	63985	Gmfb	FALSE	Glia maturation factor beta OS=Mus musculus OX=10090 GN=Gmfb PE=1 SV=3	55	7	79	6	26.954	230.83	7	16.7	1.02136e+07	2.0252e+07	7.1746e+06	7.1746e+06	1.09157e+07	2.17218e+07	1.41973e+07	6.36426e+06	8.70902e+06	2.47953e+07	1.7284e+07	5.85918e+06	1.13343e+07	7	7	6	7	7	7	7	6	7	7	6	7	6	6	5	6	6	6	6	5	6	6	5	6
Q6NXI6	75137	Rprd2	FALSE	Regulation of nuclear pre-mRNA domain-containing protein 2 OS=Mus musculus OX=10090 GN=Rprd2 PE=1 SV=1	15	13	78	13	52.186	230.72	13	156.5	3.30438e+06	5.15968e+06	5.76496e+06	5.76496e+06	3.66038e+06	5.04653e+06	3.23531e+06	4.93798e+06	4.72863e+06	2.05149e+06	3.91302e+06	5.67462e+06	4.93999e+06	11	10	9	11	10	10	11	11	5	10	11	10	11	10	9	11	10	10	11	11	5	10	11	10
[truncated: 1,884 more rows]

## Sheet: WCL Proteomics Ndufa9 stats
UniprotKB Accession	EntrezID	GeneName	MitoCarta3.0	Description	Log2(Fold Change)	-LOG10(p-value)
P02088	15129	Hbb-b1	FALSE	Hemoglobin subunit beta-1 OS=Mus musculus OX=10090 GN=Hbb-b1 PE=1 SV=2	-0.0725151	0.0748688
P01942	15122	Hba-a1	FALSE	Hemoglobin subunit alpha OS=Mus musculus OX=10090 GN=Hba PE=1 SV=2	-0.0231145	0.501032
[truncated: 2,998 more rows]

## Sheet: WCL Proteomics Ndufa9 sig
Upregulated in ndufa9-/-					ndufa9-/- vs. ndufa9f/f
[truncated: 37 more rows]

[truncated: 8 more sheets: WCL Proteomics Ndufa9 oxphos, Mito Proteomics Ndufa9 data, Mito Proteomics Ndufa9 stats, Mito Proteomics Ndufa9 sig, Mito Proteomics Ndufa9 oxphos, Metabolomics Ndufa9 data, Metabolomics Ndufa9 stats, Metabolic Tracing Data]
