# Supplementary material for: Differential requirements for mitochondrial electron transport chain components in the adult murine liver
Source: eLife. 2022 Sep 26;11:e80919. doi: 10.7554/eLife.80919 (PMC9648974; doi:10.7554/eLife.80919)
Supplement: Supplementary file 2. [file elife-80919-supp2.xlsx]

## Sheet: SuppFile2
Supplementary File 2 - Proteomics and Metabolomics Analysis of complex IV deficient livers at 8 weeks post-AAV administration.
Tables
	WCL Proteomics Cox10 data				Raw data and information from proteomics analysis of cox10-/- vs. cox10f/f liver lysate.
	WCL Proteomics Cox10 stats				Statistics of differential abundance from proteomic analysis of cox10-/- vs. cox10f/f liver lysate.
	WCL Proteomics Cox10 sig				List and statistical data for significantly upregulated and downregulated proteins in cox10-/- vs. cox10f/f lysate.
	WCL Proteomics Cox10 oxphos				List and statistical data for mitochondrial OXPHOS proteins in cox10-/- vs. cox10f/f lysate.
	GO Cox10 ALL up				Gene ontology analysis for significantly enriched pathways in upregulated genes in cox10-/- liver lysate; FDR < 0.05
	GO Cox10 mito up				Gene ontology analysis for significantly enriched pathways in mitochondrial upregulated genes in cox10-/- liver lysate; FDR < 0.05
	GO Cox10 nonmito up				Gene ontology analysis for significantly enriched pathways in non-mitochondrial upregulated genes in cox10-/- liver lysate; FDR < 0.05
	GO Cox10 ALL down				Gene ontology analysis for significantly enriched pathways in downregulated genes in cox10-/- liver lysate; FDR < 0.05
	GO Cox10 mito down				Gene ontology analysis for significantly enriched pathways in mitochondrial downregulated genes in cox10-/- liver lysate; FDR < 0.05
	GO Cox10 nonmito down				Gene ontology analysis for significantly enriched pathways in non-mitochondrial downregulated genes in cox10-/- liver lysate; FDR < 0.05
	Mito Proteomics Cox10 data				Raw data and information from proteomics analysis of cox10-/- vs. cox10f/f enriched mitochondria.
	Mito Proteomics Cox10 stats				Statistics of differential abundance from proteomic analysis of cox10-/- vs. cox10f/f enriched mitochondria.
	Mito Proteomics Cox10 sig				List and statistical data for significantly upregulated and downregulated proteins in cox10-/- vs. cox10f/f enriched mitochondria.
	Mito Proteomics Cox10 oxphos				List and statistical data for mitochondrial OXPHOS proteins in cox10-/- vs. cox10f/f enriched mitochondria.
	Metabolomics Cox10 data				Processed metabolomics data from analysis of cox10-/- vs. cox10f/f liver tissue.
	Metabolomics Cox10 stats				Statistics of differential abundance from metabolomics analysis of cox10-/- vs. cox10f/f liver tissue.
	Metabolic Tracing data (glucose)				Processed tracing data from [U-13C]glucose infusions in cox10f/f and cox10-/- animals.
	Metabolic Tracing data (lactate/pyruvate)				Processed tracing data from [U-13C]lactate/pyruvate tolerance test in cox10f/f and cox10-/- animals.

## Sheet: WCL Proteomics Cox10 data
UniprotKB Accession	EntrezID	Gene Name	MitoCarta3.0	Description	% Coverage	# Peptides	# PSMs	# Unique Peptides	Sum PEP Score	Score Sequest HT: Sequest HT	# Peptides (by Search Engine): Sequest HT	MW in kDa	Protein Abundances per replicate											Peptide count per replicate											Unique Peptide count per replicate
													cox10f/f #1	cox10f/f #2	cox10f/f #3	cox10f/f #4	cox10f/f #5	cox10-/- #1	cox10-/- #2	cox10-/- #3	cox10-/- #4	cox10-/- #5	cox10-/- #6	cox10f/f #1	cox10f/f #2	cox10f/f #3	cox10f/f #4	cox10f/f #5	cox10-/- #1	cox10-/- #2	cox10-/- #3	cox10-/- #4	cox10-/- #5	cox10-/- #6	cox10f/f #1	cox10f/f #2	cox10f/f #3	cox10f/f #4	cox10f/f #5	cox10-/- #1	cox10-/- #2	cox10-/- #3	cox10-/- #4	cox10-/- #5	cox10-/- #6
P02088	15129	Hbb-b1	FALSE	Hemoglobin subunit beta-1 OS=Mus musculus OX=10090 GN=Hbb-b1 PE=1 SV=2	82	14	3922	8	150.886	10356.5	14	15.8	2.56863e+09	8.66181e+09	7.89948e+09	1.02316e+10	4.5759e+09	1.19893e+10	3.62166e+09	1.01354e+10	7.8053e+09	1.04339e+10	7.74093e+09	14	14	14	14	14	14	14	14	14	14	14	14	14	14	14	14	14	14	14	14	14	14
Q99PL5	81910	Rrbp1	FALSE	Ribosome-binding protein 1 OS=Mus musculus OX=10090 GN=Rrbp1 PE=1 SV=2	78	123	3228	123	624.968	9245.91	123	172.8	2.69357e+09	1.93906e+09	1.7703e+09	2.16875e+09	2.87232e+09	1.03329e+09	1.26447e+09	1.38397e+09	1.77514e+09	9.94053e+08	2.26532e+09	116	110	110	113	111	98	107	108	118	103	114	116	110	110	113	111	98	107	108	118	103	114
P01942	15122	Hba-a1	FALSE	Hemoglobin subunit alpha OS=Mus musculus OX=10090 GN=Hba PE=1 SV=2	79	17	3209	17	143.018	7878.72	17	15.1	3.57126e+09	8.35463e+09	8.60468e+09	1.1089e+10	5.19282e+09	1.32567e+10	3.98857e+09	1.08329e+10	1.10189e+10	1.06075e+10	8.47198e+09	17	17	17	17	17	17	17	17	16	17	16	17	17	17	17	17	17	17	17	16	17	16
P08228	20655	Sod1	TRUE	Superoxide dismutase [Cu-Zn] OS=Mus musculus OX=10090 GN=Sod1 PE=1 SV=2	100	23	2721	23	170.731	7247.63	23	15.9	7.55222e+09	5.74948e+09	6.73906e+09	7.73561e+09	9.08109e+09	2.70175e+09	3.87317e+09	4.01185e+09	5.49474e+09	4.05507e+09	7.81088e+09	21	20	21	22	22	19	19	19	22	19	20	21	20	21	22	22	19	19	19	22	19	20
Q64433	15528	Hspe1	TRUE	10 kDa heat shock protein, mitochondrial OS=Mus musculus OX=10090 GN=Hspe1 PE=1 SV=2	100	24	1789	24	126.535	4458.28	24	11	1.73667e+09	1.67093e+09	1.61112e+09	1.73808e+09	2.46236e+09	2.74887e+09	4.57666e+09	5.58771e+09	7.56523e+09	5.57526e+09	4.32542e+09	22	22	22	22	22	23	23	24	24	23	22	22	22	22	22	22	23	23	24	24	23	22
P12710	14080	Fabp1	TRUE	Fatty acid-binding protein, liver OS=Mus musculus OX=10090 GN=Fabp1 PE=1 SV=2	96	23	1762	23	140.184	4980.71	23	14.2	4.09813e+09	4.35134e+09	4.52553e+09	4.57318e+09	6.42136e+09	1.50456e+09	1.37024e+09	2.22405e+09	2.0266e+09	1.18352e+09	3.67277e+09	21	21	21	22	23	20	22	21	21	21	22	21	21	21	22	23	20	22	21	21	21	22
P52760	15473	Rida	TRUE	2-iminobutanoate/2-iminopropanoate deaminase OS=Mus musculus OX=10090 GN=Rida PE=1 SV=3	100	21	1747	21	129.79	5211.41	21	14.2	3.60013e+09	4.2122e+09	4.49237e+09	3.31287e+09	4.78601e+09	1.6118e+09	1.55867e+09	2.87682e+09	3.33362e+09	1.7348e+09	4.29622e+09	21	21	21	21	21	18	19	20	19	19	20	21	21	21	21	21	18	19	20	19	19	20
P16546	20740	Sptan1	FALSE	Spectrin alpha chain, non-erythrocytic 1 OS=Mus musculus OX=10090 GN=Sptan1 PE=1 SV=4	78	186	1512	185	984.355	4544.19	186	284.4	9.17035e+07	6.98914e+08	6.73009e+08	4.9959e+08	1.40634e+08	7.09641e+08	1.93174e+08	5.2805e+08	4.45503e+08	5.89616e+08	4.56765e+08	115	177	175	178	123	176	155	176	167	174	167	115	177	175	178	123	176	155	176	167	174	167
Q8VDD5	17886	Myh9	FALSE	Myosin-9 OS=Mus musculus OX=10090 GN=Myh9 PE=1 SV=4	41	110	1488	103	682.691	4551.36	110	226.2	7.19172e+08	5.45723e+08	4.79166e+08	6.13254e+08	7.47483e+08	5.64839e+08	6.02948e+08	5.73443e+08	1.13737e+09	7.26122e+08	9.88553e+08	102	97	95	101	97	93	102	93	107	101	101	102	97	95	101	97	93	102	93	107	101	101
Q8BL66	216238	Eea1	FALSE	Early endosome antigen 1 OS=Mus musculus OX=10090 GN=Eea1 PE=1 SV=2	73	128	1391	128	581.685	3776.25	128	160.8	6.53281e+08	4.79376e+08	4.75088e+08	5.35002e+08	7.39762e+08	3.72075e+08	4.88338e+08	4.84347e+08	6.06965e+08	4.5787e+08	5.72051e+08	120	121	117	121	121	114	122	119	124	120	124	120	121	117	121	121	114	122	119	124	120	124
P63038	15510	Hspd1	TRUE	60 kDa heat shock protein, mitochondrial OS=Mus musculus OX=10090 GN=Hspd1 PE=1 SV=1	86	61	1311	61	401.813	4341.45	61	60.9	1.7196e+08	5.97505e+08	6.74415e+08	3.29705e+08	1.31887e+08	1.71454e+09	4.34932e+08	1.08137e+09	8.44096e+08	2.68195e+09	6.53049e+08	42	50	53	45	39	55	49	56	53	59	49	42	50	53	45	39	55	49	56	53	59	49
P02089	15130	Hbb-b2	FALSE	Hemoglobin subunit beta-2 OS=Mus musculus OX=10090 GN=Hbb-b2 PE=1 SV=2	59	9	1204	3	57.005	2415.15	9	15.9	7.53679e+06	3.01561e+07	3.79619e+07	4.82215e+07	2.26406e+07	6.94256e+07	2.53072e+07	5.43674e+07	4.80082e+07	6.25214e+07	4.43392e+07	8	8	9	8	8	8	7	9	7	8	8	8	8	9	8	8	8	7	9	7	8	8
P31786	13167	Dbi	TRUE	Acyl-CoA-binding protein OS=Mus musculus OX=10090 GN=Dbi PE=1 SV=2	94	14	1187	14	94.929	3370.83	14	10	2.93689e+09	2.32734e+09	2.56192e+09	2.97729e+09	4.27555e+09	1.55652e+09	2.56455e+09	2.08253e+09	4.67649e+09	1.85125e+09	4.90464e+09	14	14	14	14	14	13	14	14	14	14	14	14	14	14	14	14	13	14	14	14	14	14
P0DP27	12313	Calm1	FALSE	Calmodulin-2 OS=Mus musculus OX=10090 GN=Calm2 PE=1 SV=1	100	20	1153	10	192.179	3211.15	20	16.8	1.97747e+09	1.5179e+09	1.42438e+09	1.81107e+09	2.44468e+09	1.37231e+09	1.69808e+09	1.85103e+09	2.7351e+09	2.08541e+09	2.83052e+09	20	20	20	18	19	18	20	20	19	19	19	20	20	20	18	19	18	20	20	19	19	19
P27773	14827	Pdia3	FALSE	Protein disulfide-isomerase A3 OS=Mus musculus OX=10090 GN=Pdia3 PE=1 SV=2	70	49	1054	49	268.61	2958.11	49	56.6	7.37744e+08	1.85506e+09	1.87625e+09	1.48494e+09	1.12868e+09	1.36125e+09	7.00807e+08	1.12211e+09	1.64033e+09	1.07447e+09	1.49299e+09	46	48	47	47	43	45	45	47	46	46	47	46	48	47	47	43	45	45	47	46	46	47
P38647	15526	Hspa9	TRUE	Stress-70 protein, mitochondrial OS=Mus musculus OX=10090 GN=Hspa9 PE=1 SV=3	78	59	1029	59	350.036	2941	59	73.4	9.95367e+07	2.50785e+08	2.86985e+08	1.59645e+08	1.21629e+08	7.95986e+08	2.74591e+08	6.41745e+08	7.01577e+08	1.39511e+09	4.08857e+08	41	46	49	45	43	52	50	52	55	57	50	41	46	49	45	43	52	50	52	55	57	50
P27546	17758	Map4	FALSE	Microtubule-associated protein 4 OS=Mus musculus OX=10090 GN=Map4 PE=1 SV=3	69	68	944	68	402.546	2839.37	68	117.4	2.13136e+08	1.9769e+08	2.40607e+08	2.86392e+08	3.96245e+08	2.38784e+08	3.15624e+08	3.12525e+08	6.12018e+08	3.74303e+08	5.09099e+08	64	62	63	65	63	62	65	65	67	64	65	64	62	63	65	63	62	65	65	67	64	65
F6ZDS4	108989	Tpr	FALSE	Nucleoprotein TPR OS=Mus musculus OX=10090 GN=Tpr PE=1 SV=1	54	130	935	130	586.681	2657.66	130	273.8	1.26056e+08	1.21755e+08	1.28754e+08	1.66984e+08	1.35879e+08	1.01963e+08	1.09966e+08	1.06378e+08	2.13403e+08	1.19258e+08	1.40047e+08	116	116	116	120	114	112	120	113	124	116	119	116	116	116	120	114	112	120	113	124	116	119
P09103	18453	P4hb	FALSE	Protein disulfide-isomerase OS=Mus musculus OX=10090 GN=P4hb PE=1 SV=2	75	43	881	43	215.893	2564.23	43	57	2.00239e+08	9.80023e+08	8.77965e+08	7.18019e+08	2.17822e+08	1.06664e+09	3.24355e+08	5.24315e+08	6.58469e+08	9.91947e+08	6.90653e+08	38	42	41	41	37	40	39	39	41	41	41	38	42	41	41	37	40	39	39	41	41	41
P59242	70737	Cgn	FALSE	Cingulin OS=Mus musculus OX=10090 GN=Cgn PE=1 SV=1	64	90	848	89	437.829	2383.48	90	136.4	4.17651e+08	3.20205e+08	2.929e+08	2.91547e+08	4.98164e+08	1.50881e+08	2.08964e+08	2.24421e+08	2.61631e+08	1.75426e+08	3.75591e+08	84	84	84	84	85	80	83	84	84	82	84	84	84	84	84	85	80	83	84	84	82	84
Q00623	11806	Apoa1	FALSE	Apolipoprotein A-I OS=Mus musculus OX=10090 GN=Apoa1 PE=1 SV=2	81	36	838	36	201.188	2122.39	36	30.6	4.21138e+09	2.66857e+09	1.90163e+09	3.70233e+09	4.59733e+09	2.48598e+09	1.6289e+09	1.8974e+09	2.13872e+09	1.30277e+09	3.10033e+09	36	34	33	33	34	34	35	33	34	33	33	36	34	33	33	34	34	35	33	34	33	33
P20029	14828	Hspa5	FALSE	Endoplasmic reticulum chaperone BiP OS=Mus musculus OX=10090 GN=Hspa5 PE=1 SV=3	71	47	801	45	271.656	2237.22	47	72.4	1.28675e+08	5.52124e+08	5.54705e+08	3.70867e+08	1.55438e+08	7.16224e+08	1.65808e+08	3.25694e+08	4.911e+08	5.48869e+08	4.19779e+08	42	42	44	42	41	43	42	42	46	44	46	42	42	44	42	41	43	42	42	46	44	46
P58871	228140	Tnks1bp1	FALSE	182 kDa tankyrase-1-binding protein OS=Mus musculus OX=10090 GN=Tnks1bp1 PE=1 SV=2	66	86	793	86	429.826	2415.71	86	181.7	1.8695e+08	1.88023e+08	1.8311e+08	1.9065e+08	2.41682e+08	1.08448e+08	1.29859e+08	1.36051e+08	1.77848e+08	1.21001e+08	2.18587e+08	76	77	75	76	75	65	74	75	76	72	74	76	77	75	76	75	65	74	75	76	72	74
P14211	12317	Calr	FALSE	Calreticulin OS=Mus musculus OX=10090 GN=Calr PE=1 SV=1	73	31	779	31	161.782	1992.3	31	48	1.51228e+08	3.26404e+08	3.88533e+08	3.46157e+08	1.59739e+08	4.11219e+08	1.24638e+08	1.89981e+08	2.64206e+08	3.43292e+08	3.64173e+08	30	29	29	30	29	31	30	29	31	31	31	30	29	29	30	29	31	30	29	31	31	31
O35658	12261	C1qbp	TRUE	Complement component 1 Q subcomponent-binding protein, mitochondrial OS=Mus musculus OX=10090 GN=C1qbp PE=1 SV=1	55	10	766	10	74.484	2267.35	10	31	1.44557e+08	1.39103e+08	1.30375e+08	1.34644e+08	1.78503e+08	5.60221e+08	6.62418e+08	7.34981e+08	7.79892e+08	1.04668e+09	4.61331e+08	10	10	9	10	10	10	10	10	10	10	10	10	10	9	10	10	10	10	10	10	10	10
Q9D3D9	66043	Atp5d	TRUE	ATP synthase subunit delta, mitochondrial OS=Mus musculus OX=10090 GN=Atp5f1d PE=1 SV=1	63	6	728	6	35.069	2561.04	6	17.6	2.71992e+08	2.5913e+08	3.04879e+08	3.26582e+08	3.16191e+08	6.46949e+08	6.84321e+08	8.53235e+08	1.43865e+09	1.15552e+09	7.97179e+08	5	5	5	5	5	5	5	5	6	5	5	5	5	5	5	5	5	5	5	6	5	5
Q8BI84	338366	Mia3	FALSE	Transport and Golgi organization protein 1 homolog OS=Mus musculus OX=10090 GN=Mia3 PE=1 SV=2	54	92	722	92	429.465	1966.57	92	213.5	1.12923e+08	1.35924e+08	1.46062e+08	1.26134e+08	1.06169e+08	9.88128e+07	6.87289e+07	8.74542e+07	1.24407e+08	1.0601e+08	1.3606e+08	83	80	82	81	77	79	77	77	79	78	78	83	80	82	81	77	79	77	77	79	78	78
P58771	22003	Tpm1	FALSE	Tropomyosin alpha-1 chain OS=Mus musculus OX=10090 GN=Tpm1 PE=1 SV=1	86	51	708	20	258.447	1937.77	51	32.7	8.24542e+08	7.23707e+08	6.16728e+08	8.21525e+08	8.758e+08	3.29467e+09	1.55806e+09	1.32642e+09	2.64631e+09	1.817e+09	1.75981e+09	40	33	35	40	34	46	43	38	48	42	44	40	33	35	40	34	46	43	38	48	42	44
P21107	59069	Tpm3	FALSE	Tropomyosin alpha-3 chain OS=Mus musculus OX=10090 GN=Tpm3 PE=1 SV=3	79	43	700	20	210.005	1887.19	43	33	5.10638e+08	3.90544e+08	3.51094e+08	3.97659e+08	5.00668e+08	5.32652e+08	6.94449e+08	6.35936e+08	1.03708e+09	7.08986e+08	8.12093e+08	33	29	30	32	29	40	34	30	37	34	35	33	29	30	32	29	40	34	30	37	34	35
P20152	22352	Vim	FALSE	Vimentin OS=Mus musculus OX=10090 GN=Vim PE=1 SV=3	86	50	696	43	260.117	2011.43	50	53.7	1.90803e+08	3.62655e+08	2.99288e+08	5.3374e+08	2.00279e+08	1.21183e+09	2.79929e+08	3.4385e+08	6.65561e+08	4.58854e+08	6.35733e+08	45	45	44	46	41	47	47	46	50	48	47	45	45	44	46	41	47	47	46	50	48	47
P51125	12380	Cast	FALSE	Calpastatin OS=Mus musculus OX=10090 GN=Cast PE=1 SV=2	69	48	682	48	306.281	2026.84	48	84.9	1.66641e+08	1.09673e+08	8.9683e+07	1.18862e+08	2.33345e+08	1.19984e+08	2.00161e+08	1.73553e+08	2.59194e+08	2.12733e+08	2.3781e+08	46	44	41	43	46	43	47	44	44	45	46	46	44	41	43	46	43	47	44	44	45	46
Q02819	18220	Nucb1	FALSE	Nucleobindin-1 OS=Mus musculus OX=10090 GN=Nucb1 PE=1 SV=2	83	46	681	46	265.068	1840.44	46	53.4	3.8052e+08	2.55302e+08	2.62506e+08	3.1632e+08	3.82215e+08	2.19082e+08	2.63787e+08	2.68021e+08	4.73875e+08	3.16695e+08	4.73185e+08	41	42	42	43	41	41	44	41	45	42	44	41	42	42	43	41	41	44	41	45	42	44
Q8BGD9	75705	Eif4b	FALSE	Eukaryotic translation initiation factor 4B OS=Mus musculus OX=10090 GN=Eif4b PE=1 SV=1	54	41	680	41	189.604	1723.3	41	68.8	3.55578e+08	2.51679e+08	2.43017e+08	2.64875e+08	3.73786e+08	1.56837e+08	2.39138e+08	2.36163e+08	4.19891e+08	2.54411e+08	3.72037e+08	41	41	41	41	41	40	41	40	40	40	41	41	41	41	41	41	40	41	40	40	40	41
Q8C196	227231	Cps1	TRUE	Carbamoyl-phosphate synthase [ammonia], mitochondrial OS=Mus musculus OX=10090 GN=Cps1 PE=1 SV=2	47	62	678	62	299.984	1994.88	62	164.5	6.74656e+07	1.27664e+08	1.24976e+08	9.72366e+07	9.56374e+07	2.24836e+08	1.89639e+08	3.32665e+08	3.20701e+08	3.47589e+08	2.11316e+08	39	54	55	47	44	55	56	59	59	60	53	39	54	55	47	44	55	56	59	59	60	53
Q9CY58	66870	Serbp1	FALSE	Plasminogen activator inhibitor 1 RNA-binding protein OS=Mus musculus OX=10090 GN=Serbp1 PE=1 SV=2	67	40	671	40	232.584	2108.25	40	44.7	4.5203e+08	4.23667e+08	3.74397e+08	4.00626e+08	5.09665e+08	3.00103e+08	3.91108e+08	4.51254e+08	6.36762e+08	5.22957e+08	5.75942e+08	37	37	38	36	34	33	37	35	39	37	37	37	37	38	36	34	33	37	35	39	37	37
Q922J3	56430	Clip1	FALSE	CAP-Gly domain-containing linker protein 1 OS=Mus musculus OX=10090 GN=Clip1 PE=1 SV=1	62	88	653	80	439.399	1887.2	88	155.7	1.50242e+08	1.37159e+08	1.29933e+08	1.28525e+08	1.598e+08	1.26844e+08	1.02796e+08	1.19979e+08	1.59539e+08	1.25418e+08	1.60465e+08	81	80	80	82	79	77	79	78	83	80	80	81	80	80	82	79	77	79	78	83	80	80
Q64478	319182	H2bc9	FALSE	Histone H2B type 1-H OS=Mus musculus OX=10090 GN=H2bc9 PE=1 SV=3	73	16	636	16	77.302	1517.08	16	13.9	4.33872e+08	9.9711e+08	1.17117e+09	1.04176e+09	1.16002e+09	7.86328e+08	3.26908e+08	7.51931e+08	1.18979e+09	1.35276e+09	1.02043e+09	15	16	16	15	16	15	15	16	16	16	16	15	16	16	15	16	15	15	16	16	16	16
Q4VAA2	321022	Cdv3	FALSE	Protein CDV3 OS=Mus musculus OX=10090 GN=Cdv3 PE=1 SV=2	72	20	629	20	121.491	1607.58	20	29.7	1.75417e+08	1.18818e+08	9.31289e+07	1.17672e+08	2.09922e+08	1.10943e+08	1.68421e+08	1.5014e+08	3.10279e+08	1.96357e+08	2.31436e+08	20	19	19	18	20	19	19	20	17	19	19	20	19	19	18	20	19	19	20	17	19	19
P09405	17975	Ncl	FALSE	Nucleolin OS=Mus musculus OX=10090 GN=Ncl PE=1 SV=2	55	50	625	50	207.435	1744.65	50	76.7	1.67975e+08	2.45383e+08	1.85817e+08	1.86033e+08	1.31903e+08	3.7603e+08	4.43154e+08	3.93164e+08	7.92461e+08	7.22014e+08	3.26877e+08	41	41	42	41	39	40	45	42	49	43	39	41	41	42	41	39	40	45	42	49	43	39
Q6PGL7	28006	Washc2	FALSE	WASH complex subunit 2 OS=Mus musculus OX=10090 GN=Washc2 PE=1 SV=1	74	64	619	64	357.003	2014.88	64	145.2	1.11152e+08	9.25435e+07	8.59005e+07	9.16433e+07	1.14951e+08	8.03478e+07	1.16366e+08	1.1301e+08	1.93925e+08	1.33828e+08	1.4574e+08	60	54	60	60	58	57	62	60	63	61	61	60	54	60	60	58	57	62	60	63	61	61
Q6IRU2	326618	Tpm4	FALSE	Tropomyosin alpha-4 chain OS=Mus musculus OX=10090 GN=Tpm4 PE=1 SV=3	82	39	613	34	215.115	1687.65	39	28.5	2.92353e+08	2.60541e+08	2.22075e+08	3.10354e+08	3.24834e+08	3.77436e+08	4.19263e+08	3.96525e+08	8.02904e+08	4.63026e+08	6.39988e+08	37	33	33	33	32	33	37	35	39	36	37	37	33	33	33	32	33	37	35	39	36	37
P35564	12330	Canx	FALSE	Calnexin OS=Mus musculus OX=10090 GN=Canx PE=1 SV=1	61	45	611	45	276.44	1785.38	45	67.2	9.79899e+07	4.06678e+08	4.43068e+08	3.34728e+08	1.43483e+08	3.94596e+08	1.3028e+08	2.23071e+08	2.96235e+08	3.0409e+08	3.41544e+08	41	42	43	44	41	43	41	41	42	43	43	41	42	43	44	41	43	41	41	42	43	43
E9Q7G0	101706	Numa1	FALSE	Nuclear mitotic apparatus protein 1 OS=Mus musculus OX=10090 GN=Numa1 PE=1 SV=1	47	83	602	83	350.369	1861.15	83	235.5	7.45123e+07	7.22777e+07	6.06452e+07	6.93759e+07	60612715	4.28224e+07	5.16027e+07	4.88875e+07	6.18849e+07	6.23484e+07	8.26465e+07	79	80	76	79	75	72	78	76	73	76	79	79	80	76	79	75	72	78	76	73	76	79
Q3TLH4	226562	Prrc2c	FALSE	Protein PRRC2C OS=Mus musculus OX=10090 GN=Prrc2c PE=1 SV=3	34	80	595	76	363.474	1621.87	80	310.7	8.38624e+07	5.81866e+07	5.90523e+07	6.09562e+07	9.86005e+07	4.28508e+07	6.48297e+07	6.72144e+07	1.06773e+08	6.92882e+07	9.90556e+07	77	72	71	74	73	65	71	75	79	75	77	77	72	71	74	73	65	71	75	79	75	77
P58774	22004	Tpm2	FALSE	Tropomyosin beta chain OS=Mus musculus OX=10090 GN=Tpm2 PE=1 SV=1	73	43	591	22	218.167	1518.13	43	32.8	2.58996e+07	2.65821e+07	2.64937e+07	6.75298e+07	3.41771e+07	5.52982e+08	3.43877e+07	2.45919e+07	6.25646e+07	4.15688e+07	1.03508e+08	34	30	30	32	28	40	33	29	39	30	33	34	30	30	32	28	40	33	29	39	30	33
Q91VW5	54214	Golga4	FALSE	Golgin subfamily A member 4 OS=Mus musculus OX=10090 GN=Golga4 PE=1 SV=2	46	92	565	92	383.825	1650.43	92	257.4	5.02875e+07	4.4219e+07	4.51619e+07	5.42268e+07	5.39331e+07	4.40442e+07	4.495e+07	4.30502e+07	7.08648e+07	5.13456e+07	6.21612e+07	85	84	82	86	81	82	83	80	81	80	85	85	84	82	86	81	82	83	80	81	80	85
P06728	11808	Apoa4	FALSE	Apolipoprotein A-IV OS=Mus musculus OX=10090 GN=Apoa4 PE=1 SV=3	80	31	552	31	216.541	1551.8	31	45	4.80171e+08	2.82577e+08	2.46625e+08	3.73495e+08	3.74309e+08	3.69936e+08	3.28953e+08	3.04761e+08	1.04724e+09	3.53977e+08	6.08948e+08	29	29	28	29	28	28	29	28	31	28	29	29	29	28	29	28	28	29	28	31	28	29
Q9D0J8	69202	Ptms	FALSE	Parathymosin OS=Mus musculus OX=10090 GN=Ptms PE=1 SV=3	75	9	552	9	52.114	1384.31	9	11.4	5.04219e+08	4.15938e+08	4.34579e+08	5.31852e+08	6.35982e+08	1.77307e+08	2.09357e+08	2.72831e+08	3.84722e+08	1.9154e+08	4.62634e+08	9	8	8	9	8	6	8	7	8	6	9	9	8	8	9	8	6	8	7	8	6	9
P08032	20739	Spta1	FALSE	Spectrin alpha chain, erythrocytic 1 OS=Mus musculus OX=10090 GN=Spta1 PE=1 SV=3	56	110	548	109	470.14	1577.74	110	279.7	9.12734e+06	9.16173e+07	9.76648e+07	1.08047e+08	2.37784e+06	1.23111e+08	1.74493e+07	7.68995e+07	4.34413e+07	1.0101e+08	5.43865e+07	31	101	103	106	24	102	62	99	77	103	87	31	101	103	106	24	102	62	99	77	103	87
Q60864	20867	Stip1	FALSE	Stress-induced-phosphoprotein 1 OS=Mus musculus OX=10090 GN=Stip1 PE=1 SV=1	69	52	546	52	267.752	1439.25	52	62.5	1.42642e+08	2.476e+08	2.71648e+08	1.79608e+08	1.74688e+08	1.96422e+08	1.0484e+08	1.77988e+08	2.69719e+08	2.31615e+08	2.52645e+08	48	50	50	50	46	48	50	49	52	50	50	48	50	50	50	46	48	50	49	52	50	50
Q60598	13043	Cttn	FALSE	Src substrate cortactin OS=Mus musculus OX=10090 GN=Cttn PE=1 SV=2	64	40	528	40	160.036	1363.62	40	61.2	2.98479e+08	2.77017e+08	2.54769e+08	2.81888e+08	3.79199e+08	2.54869e+08	3.04504e+08	3.20907e+08	5.28317e+08	3.59972e+08	4.15948e+08	36	34	35	37	35	35	37	36	40	37	38	36	34	35	37	35	35	37	36	40	37	38
O35887	12321	Calu	FALSE	Calumenin OS=Mus musculus OX=10090 GN=Calu PE=1 SV=1	78	34	525	34	225.603	1597.32	34	37	2.79493e+08	2.29609e+08	1.99858e+08	2.51094e+08	2.94101e+08	2.2321e+08	2.84754e+08	2.61278e+08	4.74057e+08	3.064e+08	4.803e+08	26	26	25	25	25	25	27	25	31	28	27	26	26	25	25	25	25	27	25	31	28	27
Q64727	22330	Vcl	FALSE	Vinculin OS=Mus musculus OX=10090 GN=Vcl PE=1 SV=4	72	67	524	67	333.05	1514.89	67	116.6	1.35611e+07	1.2363e+08	1.27284e+08	9.68043e+07	1.94488e+07	2.29941e+08	7.38035e+07	1.58962e+08	1.21735e+08	2.10526e+08	1.16126e+08	37	63	63	63	43	66	59	63	62	63	64	37	63	63	63	43	66	59	63	62	63	64
P08226	11816	Apoe	FALSE	Apolipoprotein E OS=Mus musculus OX=10090 GN=Apoe PE=1 SV=2	66	23	522	23	161.931	1296.85	23	35.8	5.51165e+08	6.82276e+08	6.31538e+08	6.85317e+08	9.81337e+08	5.21363e+08	5.03806e+08	7.01427e+08	1.35329e+09	6.15692e+08	1.01092e+09	23	23	23	23	22	23	23	23	23	23	23	23	23	23	23	22	23	23	23	23	23	23
P51859	15191	Hdgf	FALSE	Hepatoma-derived growth factor OS=Mus musculus OX=10090 GN=Hdgf PE=1 SV=2	89	28	521	26	141.887	1533.86	28	26.3	2.10476e+08	2.13776e+08	2.06971e+08	2.11614e+08	2.71882e+08	1.59109e+08	1.62965e+08	1.9073e+08	3.52449e+08	2.24478e+08	2.82587e+08	27	26	26	27	27	24	26	27	28	27	27	27	26	26	27	27	24	26	27	28	27	27
P56395	109672	Cyb5a	FALSE	Cytochrome b5 OS=Mus musculus OX=10090 GN=Cyb5a PE=1 SV=2	96	14	520	14	79.834	1448.68	14	15.2	1.79323e+09	1.76479e+09	1.56437e+09	1.69943e+09	2.04435e+09	1.16303e+09	1.52733e+09	1.77353e+09	1.66066e+09	1.57129e+09	2.28886e+09	13	14	13	12	13	13	13	14	13	14	14	13	14	13	12	13	13	13	14	13	14	14
Q80WJ7	67154	Mtdh	FALSE	Protein LYRIC OS=Mus musculus OX=10090 GN=Mtdh PE=1 SV=1	64	41	503	41	213.604	1463.99	41	63.8	1.87168e+08	1.59982e+08	1.46485e+08	1.49133e+08	2.62267e+08	1.00048e+08	1.18236e+08	1.29925e+08	1.4561e+08	1.33234e+08	1.7785e+08	39	37	38	39	39	36	38	38	40	37	40	39	37	38	39	39	36	38	38	40	37	40
Q9CQX2	66427	Cyb5b	TRUE	Cytochrome b5 type B OS=Mus musculus OX=10090 GN=Cyb5b PE=1 SV=1	64	8	484	8	76.32	1566.73	8	16.3	5.86188e+08	4.33737e+08	5.38397e+08	4.66898e+08	6.7236e+08	6.71521e+08	9.66982e+08	1.26101e+09	7.4146e+08	6.80339e+08	1.15573e+09	8	8	8	8	8	8	8	8	8	8	8	8	8	8	8	8	8	8	8	8	8	8
Q3UZ39	16978	Lrrfip1	FALSE	Leucine-rich repeat flightless-interacting protein 1 OS=Mus musculus OX=10090 GN=Lrrfip1 PE=1 SV=2	77	49	482	48	266.57	1491.48	49	79.2	1.28941e+08	1.01717e+08	1.04454e+08	1.143e+08	1.68996e+08	1.16173e+08	1.71488e+08	1.5738e+08	2.49106e+08	1.8295e+08	2.06807e+08	41	40	40	45	45	42	42	41	43	40	41	41	40	40	45	45	42	42	41	43	40	41
Q03265	11946	Atp5a1	TRUE	ATP synthase subunit alpha, mitochondrial OS=Mus musculus OX=10090 GN=Atp5f1a PE=1 SV=1	33	16	476	16	87.709	1406.53	16	59.7	1.74613e+08	1.3833e+08	1.38484e+08	1.63456e+08	2.53576e+08	2.42788e+08	3.81588e+08	4.96041e+08	6.01207e+08	4.96319e+08	4.24796e+08	14	15	15	15	14	14	15	15	16	15	15	14	15	15	15	14	14	15	15	16	15	15
P62960	22608	Ybx1	FALSE	Y-box-binding protein 1 OS=Mus musculus OX=10090 GN=Ybx1 PE=1 SV=3	75	24	475	18	154.976	1428.37	24	35.7	1.51922e+08	1.73575e+08	1.78289e+08	2.17401e+08	1.58968e+08	1.289e+08	2.09522e+08	2.22868e+08	3.65574e+08	2.09273e+08	2.97724e+08	23	21	23	23	20	19	23	23	24	23	23	23	21	23	23	20	19	23	23	24	23	23
P99027	67186	Rplp2	FALSE	60S acidic ribosomal protein P2 OS=Mus musculus OX=10090 GN=Rplp2 PE=1 SV=3	85	13	470	13	95.756	1562.02	13	11.6	1.22306e+09	7.63133e+08	8.63337e+08	9.01764e+08	1.377e+09	6.53419e+08	9.14203e+08	8.31397e+08	1.34803e+09	1.01862e+09	1.49664e+09	12	11	13	13	13	12	13	13	13	13	13	12	11	13	13	13	12	13	13	13	13	13
Q3UMF0	319876	Cobll1	FALSE	Cordon-bleu protein-like 1 OS=Mus musculus OX=10090 GN=Cobll1 PE=1 SV=2	51	49	468	49	290.284	1330.86	49	137.3	1.34185e+08	7.42408e+07	6.39445e+07	6.30424e+07	1.2857e+08	3.14655e+07	5.38009e+07	7.46806e+07	6.43064e+07	5.09005e+07	8.41489e+07	46	44	42	43	45	41	42	42	44	41	43	46	44	42	43	45	41	42	42	44	41	43
P32020	20280	Scp2	TRUE	Sterol carrier protein 2 OS=Mus musculus OX=10090 GN=Scp2 PE=1 SV=3	23	19	468	19	135.944	1379.5	19	59.1	7.4711e+08	9.2724e+08	9.08745e+08	8.75638e+08	1.38132e+09	5.966e+08	4.76814e+08	7.52268e+08	1.0102e+09	5.63036e+08	8.63772e+08	19	18	18	19	19	19	19	19	19	19	19	19	18	18	19	19	19	19	19	19	19	19
Q3U0V1	16549	Khsrp	FALSE	Far upstream element-binding protein 2 OS=Mus musculus OX=10090 GN=Khsrp PE=1 SV=2	59	39	467	35	204.842	1394.7	39	76.7	1.22532e+08	1.25406e+08	1.38917e+08	1.16359e+08	1.46497e+08	7.97233e+07	8.51233e+07	1.09914e+08	2.02539e+08	1.15706e+08	1.71373e+08	36	35	37	36	35	36	35	37	38	35	36	36	35	37	36	35	36	35	37	38	35	36
Q91ZV0	338320	Mia2	FALSE	Melanoma inhibitory activity protein 2 OS=Mus musculus OX=10090 GN=Mia2 PE=1 SV=3	50	59	452	59	263.281	1291.9	59	156.4	7.43504e+07	1.02438e+08	1.16426e+08	9.85111e+07	7.81935e+07	6.86194e+07	5.64468e+07	6.94681e+07	8.75017e+07	7.04678e+07	9.34425e+07	50	55	56	57	53	51	51	50	48	52	55	50	55	56	57	53	51	51	50	48	52	55
P11087	12842	Col1a1	FALSE	Collagen alpha-1(I) chain OS=Mus musculus OX=10090 GN=Col1a1 PE=1 SV=4	18	21	448	21	90.298	1033.27	21	137.9	1.8735e+08	1.40285e+08	2.02284e+08	5.55244e+08	3.6934e+08	1.02999e+09	1.99106e+08	2.33826e+08	4.61034e+08	1.82907e+08	5.15858e+08	18	18	19	21	19	20	17	18	18	18	18	18	18	19	21	19	20	17	18	18	18	18
O88844	15926	Idh1	FALSE	Isocitrate dehydrogenase [NADP] cytoplasmic OS=Mus musculus OX=10090 GN=Idh1 PE=1 SV=2	65	29	445	28	179.595	1182.05	29	46.6	2.37699e+07	5.03087e+08	5.55362e+08	2.97685e+08	5.12132e+07	3.22659e+08	4.6324e+07	2.183e+08	1.13749e+08	3.16465e+08	2.02396e+08	27	29	29	28	28	28	27	29	28	29	29	27	29	29	28	28	28	27	29	28	29	29
P29391	14325	Ftl1	FALSE	Ferritin light chain 1 OS=Mus musculus OX=10090 GN=Ftl1 PE=1 SV=2	69	13	435	13	96.757	1306.14	13	20.8	3.53784e+08	5.38757e+08	4.81324e+08	5.43717e+08	3.06747e+08	3.53105e+08	5.22095e+08	5.68826e+08	7.971e+08	5.15098e+08	9.85158e+08	13	13	13	13	13	13	13	13	13	13	13	13	13	13	13	13	13	13	13	13	13	13
O55022	53328	Pgrmc1	FALSE	Membrane-associated progesterone receptor component 1 OS=Mus musculus OX=10090 GN=Pgrmc1 PE=1 SV=4	71	20	433	19	88.644	1348.85	20	21.7	7.11256e+08	5.37763e+08	5.71356e+08	5.47639e+08	9.18434e+08	4.96511e+08	6.78581e+08	5.93117e+08	8.5799e+08	5.90101e+08	9.74615e+08	19	19	19	19	19	18	19	19	20	19	19	19	19	19	19	19	18	19	19	20	19	19
P97450	11957	Atp5j	TRUE	ATP synthase-coupling factor 6, mitochondrial OS=Mus musculus OX=10090 GN=Atp5pf PE=1 SV=1	62	13	431	13	87.27	1312.2	13	12.5	6.80768e+08	4.70768e+08	4.48662e+08	5.90186e+08	1.00732e+09	8.5642e+08	1.49571e+09	1.89688e+09	2.33617e+09	1482520111	1.22736e+09	11	10	9	9	9	10	11	12	13	11	10	11	10	9	9	9	10	11	12	13	11	10
Q9JL35	50887	Hmgn5	FALSE	High mobility group nucleosome-binding domain-containing protein 5 OS=Mus musculus OX=10090 GN=Hmgn5 PE=1 SV=2	84	44	423	44	264.165	1325.26	44	45.3	1.39575e+08	1.20768e+08	1.15807e+08	1.25552e+08	2.27238e+08	6.16882e+07	7.17245e+07	7.33905e+07	1.15605e+08	6.074e+07	1.71206e+08	37	35	38	35	43	27	25	31	22	24	36	37	35	38	35	43	27	25	31	22	24	36
Q9D6P8	70405	Calml3	FALSE	Calmodulin-like protein 3 OS=Mus musculus OX=10090 GN=Calml3 PE=2 SV=1	50	10	423	1	93.975	1072.7	10	16.7			160254			215348					1.71658e+06	9	10	10	8	8	9	9	9	9	9	10	9	10	10	8	8	9	9	9	9	9	10
Q61937	18148	Npm1	FALSE	Nucleophosmin OS=Mus musculus OX=10090 GN=Npm1 PE=1 SV=1	64	23	420	23	167.509	1418.63	23	32.5	2.16098e+08	1.82659e+08	1.82819e+08	1.79717e+08	2.06487e+08	2.31519e+08	2.62967e+08	2.67169e+08	5.73942e+08	4.21546e+08	3.29466e+08	20	21	20	20	19	21	21	22	21	23	19	20	21	20	20	19	21	21	22	21	23	19
O08795	19089	Prkcsh	FALSE	Glucosidase 2 subunit beta OS=Mus musculus OX=10090 GN=Prkcsh PE=1 SV=1	43	25	411	25	131.73	1105.61	25	58.8	2.84701e+08	3.58542e+08	3.77643e+08	3.91136e+08	3.2445e+08	2.77639e+08	2.23365e+08	2.27138e+08	4.14764e+08	2.49579e+08	4.07221e+08	22	22	22	24	21	21	22	22	23	21	22	22	22	22	24	21	21	22	22	23	21	22
Q9JIX8	56215	Acin1	FALSE	Apoptotic chromatin condensation inducer in the nucleus OS=Mus musculus OX=10090 GN=Acin1 PE=1 SV=3	42	48	408	48	228.419	1106.55	48	150.6	1.33699e+08	1.08268e+08	9.33864e+07	1.0516e+08	1.58872e+08	1.07127e+08	1.142e+08	1.10089e+08	1.97216e+08	1.35488e+08	1.68613e+08	44	44	44	44	44	39	44	43	45	42	43	44	44	44	44	44	39	44	43	45	42	43
O35381	11737	Anp32a	FALSE	Acidic leucine-rich nuclear phosphoprotein 32 family member A OS=Mus musculus OX=10090 GN=Anp32a PE=1 SV=1	53	16	407	12	74.928	1122.84	16	28.5	2.67843e+08	4.10027e+08	3.6975e+08	4.57678e+08	3.4894e+08	3.11336e+08	2.68093e+08	3.09874e+08	5.09557e+08	3.96299e+08	5.1447e+08	15	15	15	15	15	15	15	15	16	16	16	15	15	15	15	15	15	15	15	16	16	16
Q7TSC1	53761	Prrc2a	FALSE	Protein PRRC2A OS=Mus musculus OX=10090 GN=Prrc2a PE=1 SV=1	34	54	406	50	260.203	1178.67	54	229.1	4.13698e+07	3.08922e+07	3.0994e+07	3.02329e+07	4.78269e+07	1.82781e+07	2.72368e+07	2.79314e+07	4.44392e+07	2.36641e+07	4.37534e+07	53	52	51	50	53	44	49	50	45	44	49	53	52	51	50	53	44	49	50	45	44	49
Q9D855	67530	Uqcrb	TRUE	Cytochrome b-c1 complex subunit 7 OS=Mus musculus OX=10090 GN=Uqcrb PE=1 SV=3	90	20	403	20	104.395	1139.79	20	13.5	2.90353e+08	2.62355e+08	2.80069e+08	2.53967e+08	4.96132e+08	6.4813e+08	8.57113e+08	1.23589e+09	1.32077e+09	9.60741e+08	7.75677e+08	18	17	18	17	17	19	18	17	20	18	17	18	17	18	17	17	19	18	17	20	18	17
Q9DCX2	71679	Atp5h	TRUE	ATP synthase subunit d, mitochondrial OS=Mus musculus OX=10090 GN=Atp5pd PE=1 SV=3	91	17	399	17	108.906	1219.08	17	18.7	2.67063e+08	3.66097e+08	3.56356e+08	3.08974e+08	3.68379e+08	8.01621e+08	7.32311e+08	1.28369e+09	1.59753e+09	1.19333e+09	7.22079e+08	15	16	15	14	15	15	15	15	16	16	14	15	16	15	14	15	15	15	15	16	16	14
P70441	26941	Slc9a3r1	FALSE	Na(+)/H(+) exchange regulatory cofactor NHE-RF1 OS=Mus musculus OX=10090 GN=Slc9a3r1 PE=1 SV=3	78	27	396	27	156.428	1211.98	27	38.6	5.42569e+08	3.85983e+08	3.84124e+08	3.44741e+08	5.48831e+08	2.17808e+08	3.07721e+08	3.19341e+08	3.51722e+08	2.21469e+08	4.58156e+08	27	26	25	26	25	24	25	26	26	26	26	27	26	25	26	25	24	25	26	26	26	26
Q8R317	56085	Ubqln1	FALSE	Ubiquilin-1 OS=Mus musculus OX=10090 GN=Ubqln1 PE=1 SV=1	54	21	394	17	204.134	1219.1	21	61.9	9.31085e+07	7.1238e+07	7.61395e+07	6.69215e+07	1.09978e+08	7.21558e+07	1.00675e+08	1.1377e+08	1.93701e+08	1.10547e+08	1.45094e+08	17	17	17	17	17	16	18	16	20	17	19	17	17	17	17	17	16	18	16	20	17	19
P32261	11905	Serpinc1	FALSE	Antithrombin-III OS=Mus musculus OX=10090 GN=Serpinc1 PE=1 SV=1	67	34	394	34	181.978	1152.5	34	52	1.52701e+08	1.26975e+08	9.31271e+07	1.47048e+08	1.83768e+08	9.80569e+07	8.8497e+07	1.07549e+08	7.77115e+07	1.12389e+08	2.00518e+08	34	32	30	33	32	34	30	34	31	32	33	34	32	30	33	32	34	30	34	31	32	33
Q80YR5	224902	Safb2	FALSE	Scaffold attachment factor B2 OS=Mus musculus OX=10090 GN=Safb2 PE=1 SV=2	53	44	392	32	208.76	1086.4	44	111.8	4.43343e+07	4.12453e+07	3.54305e+07	4.96086e+07	4.81426e+07	2.55702e+07	3.1234e+07	3.5387e+07	4.97608e+07	3.88632e+07	4.29859e+07	40	41	37	40	38	33	38	37	38	38	39	40	41	37	40	38	33	38	37	38	38	39
Q8VD04	54645	Gripap1	FALSE	GRIP1-associated protein 1 OS=Mus musculus OX=10090 GN=Gripap1 PE=1 SV=1	66	51	391	51	254.286	1129.92	51	92.7	7.21018e+07	5.96991e+07	6.01653e+07	6.49789e+07	6.77224e+07	5.19136e+07	5.4478e+07	5.3982e+07	8.66476e+07	5.76618e+07	9.15569e+07	51	49	48	49	48	47	49	48	49	47	51	51	49	48	49	48	47	49	48	49	47	51
Q60865	53872	Caprin1	FALSE	Caprin-1 OS=Mus musculus OX=10090 GN=Caprin1 PE=1 SV=2	43	24	379	24	117.527	973.77	24	78.1	1.84588e+08	1.52693e+08	1.64079e+08	1.78525e+08	2.1177e+08	1.31719e+08	1.52479e+08	1.51391e+08	2.90234e+08	1.66578e+08	2.49589e+08	24	21	22	23	21	20	24	22	23	22	24	24	21	22	23	21	20	24	22	23	22	24
D3YXK2	224903	Safb	FALSE	Scaffold attachment factor B1 OS=Mus musculus OX=10090 GN=Safb PE=1 SV=2	43	34	378	22	196.308	1010.27	34	105	3.74989e+07	3.69867e+07	3.59191e+07	3.83076e+07	3.68146e+07	2.09238e+07	2.58373e+07	2.65828e+07	4.50226e+07	3.23785e+07	3.93067e+07	30	32	30	32	31	26	30	30	30	29	30	30	32	30	32	31	26	30	30	30	29	30
Q80X50	74383	Ubap2l	FALSE	Ubiquitin-associated protein 2-like OS=Mus musculus OX=10090 GN=Ubap2l PE=1 SV=1	43	29	373	29	200.14	1122.48	29	116.7	1.07086e+08	7.5146e+07	7.44484e+07	8.19462e+07	1.14658e+08	5.99189e+07	9.13516e+07	9.74414e+07	1.54453e+08	9.99494e+07	1.32251e+08	26	27	26	27	26	25	27	26	28	27	29	26	27	26	27	26	25	27	26	28	27	29
Q9WTQ5	83397	Akap12	FALSE	A-kinase anchor protein 12 OS=Mus musculus OX=10090 GN=Akap12 PE=1 SV=1	59	59	368	59	281.471	1099.46	59	180.6	2.04388e+07	1.86726e+07	2.12775e+07	3.49764e+07	3.72505e+07	3.81205e+07	2.67745e+07	2.91367e+07	5.16137e+07	3.09652e+07	4.87733e+07	42	45	43	50	45	49	43	45	47	42	51	42	45	43	50	45	49	43	45	47	42	51
Q9JLV1	29810	Bag3	FALSE	BAG family molecular chaperone regulator 3 OS=Mus musculus OX=10090 GN=Bag3 PE=1 SV=2	76	34	366	34	201.75	1093.98	34	61.8	1.91966e+08	1.07396e+08	1.15481e+08	1.14525e+08	2.13025e+08	7.17812e+07	1.19681e+08	1.15396e+08	1.84674e+08	9.82966e+07	1.99034e+08	33	33	32	32	33	31	32	32	33	32	32	33	33	32	32	33	31	32	32	33	32	32
Q9DBR7	17931	Ppp1r12a	FALSE	Protein phosphatase 1 regulatory subunit 12A OS=Mus musculus OX=10090 GN=Ppp1r12a PE=1 SV=2	58	57	365	54	238.171	985.14	57	114.9	4.90792e+07	4.82187e+07	4.55205e+07	5.34684e+07	4.89524e+07	4.44095e+07	4.89e+07	4.66361e+07	8.10788e+07	5.16755e+07	7.46654e+07	49	47	47	52	49	47	50	50	51	48	52	49	47	47	52	49	47	50	50	51	48	52
P26039	21894	Tln1	FALSE	Talin-1 OS=Mus musculus OX=10090 GN=Tln1 PE=1 SV=2	36	62	362	57	298.458	1117.12	62	269.7	7.44031e+06	4.56905e+07	3.62023e+07	3.1384e+07	7.27492e+06	5.73864e+07	1.02803e+07	3.12114e+07	1.74573e+07	4.62357e+07	3.32906e+07	28	60	59	57	31	58	38	53	40	59	56	28	60	59	57	31	58	38	53	40	59	56
P09055	16412	Itgb1	FALSE	Integrin beta-1 OS=Mus musculus OX=10090 GN=Itgb1 PE=1 SV=1	44	27	360	27	146.883	1032.14	27	88.2	4.87176e+07	1.19544e+08	1.3619e+08	1.5963e+08	7.45689e+07	1.72849e+08	8.39734e+07	1.17711e+08	2.17123e+08	1.68702e+08	1.60271e+08	21	23	23	27	22	23	22	23	23	21	25	21	23	23	27	22	23	22	23	23	21	25
B9EKI3	232286	Tmf1	FALSE	TATA element modulatory factor OS=Mus musculus OX=10090 GN=Tmf1 PE=1 SV=2	56	49	356	49	205.389	1016.02	49	121.7	5.0749e+07	3.2526e+07	3.00393e+07	3.48694e+07	5.27644e+07	2.85824e+07	4.11468e+07	3.55596e+07	4.96832e+07	3.8812e+07	4.77081e+07	47	47	44	48	47	44	46	45	47	45	46	47	47	44	48	47	44	46	45	47	45	46
P63017	15481	Hspa8	FALSE	Heat shock cognate 71 kDa protein OS=Mus musculus OX=10090 GN=Hspa8 PE=1 SV=1	69	36	352	31	182.591	938.59	36	70.8	3.60743e+07	5.96744e+07	5.89945e+07	6.48765e+07	4.50351e+07	6.04943e+07	2.32118e+07	3.54262e+07	5.03381e+07	7.07649e+07	5.98938e+07	32	35	34	33	28	33	32	31	32	35	33	32	35	34	33	28	33	32	31	32	35	33
Q9Z2I0	56384	Letm1	TRUE	Mitochondrial proton/calcium exchanger protein OS=Mus musculus OX=10090 GN=Letm1 PE=1 SV=1	56	39	352	39	216.635	1220.81	39	82.9	6.09592e+07	5.60166e+07	6.25962e+07	5.13017e+07	5.76216e+07	1.09847e+08	6.71357e+07	1.28533e+08	1.0816e+08	1.6408e+08	9.72374e+07	28	32	32	33	31	36	35	37	31	37	37	28	32	32	33	31	36	35	37	31	37	37
Q8BXA1	73124	Golim4	FALSE	Golgi integral membrane protein 4 OS=Mus musculus OX=10090 GN=Golim4 PE=1 SV=1	55	37	351	37	186.556	980.95	37	76.7	3.77322e+07	2.64633e+07	3.51488e+07	3.34321e+07	4.904e+07	4.9598e+07	6.24139e+07	4.82385e+07	6.4028e+07	6.187e+07	6.27507e+07	34	31	32	32	33	34	35	34	34	36	36	34	31	32	32	33	34	35	34	34	36	36
P10649	14862	Gstm1	FALSE	Glutathione S-transferase Mu 1 OS=Mus musculus OX=10090 GN=Gstm1 PE=1 SV=2	79	23	350	14	150.614	967.48	23	26	2.93252e+07	3.45886e+08	3.68148e+08	2.39219e+08	5.6429e+07	5.76328e+08	1.78775e+08	3.21925e+08	2.73047e+08	7.21245e+08	3.04161e+08	18	21	20	20	17	21	20	20	23	22	21	18	21	20	20	17	21	20	20	23	22	21
P24270	12359	Cat	TRUE	Catalase OS=Mus musculus OX=10090 GN=Cat PE=1 SV=4	68	31	348	31	184.423	1020.02	31	59.8	1.11974e+08	1.96711e+08	2.14151e+08	1.70003e+08	1.87355e+08	1.49254e+08	8.48163e+07	1.38103e+08	1.68619e+08	2.31601e+08	1.83364e+08	25	30	30	30	26	29	27	29	30	31	30	25	30	30	30	26	29	27	29	30	31	30
P46656	14148	Fdx1	TRUE	Adrenodoxin, mitochondrial OS=Mus musculus OX=10090 GN=Fdx1 PE=1 SV=1	41	9	345	9	50.898	754.25	9	20.1	2.61885e+08	2.16928e+08	2.00629e+08	2.74258e+08	3.69209e+08	2.14262e+08	2.29228e+08	2.99224e+08	2.43792e+08	2.32524e+08	3.04192e+08	9	9	9	9	9	8	9	9	8	9	9	9	9	9	9	9	8	9	9	8	9	9
Q9DBG5	66905	Plin3	FALSE	Perilipin-3 OS=Mus musculus OX=10090 GN=Plin3 PE=1 SV=1	81	23	341	23	179.092	1128.52	23	47.2	8.87551e+07	1.06271e+08	1.01604e+08	9.73926e+07	1.29406e+08	1.13816e+08	8.62683e+07	9.26976e+07	1.94818e+08	9.21501e+07	1.41425e+08	20	21	21	21	21	22	21	21	22	21	22	20	21	21	21	21	22	21	21	22	21	22
Q9JHU2	114301	Palmd	FALSE	Palmdelphin OS=Mus musculus OX=10090 GN=Palmd PE=1 SV=1	67	36	341	36	177.933	1016.17	36	62.7	6.73861e+07	6.60799e+07	6.38414e+07	6.72447e+07	9.37521e+07	6.39355e+07	8.9471e+07	7.90375e+07	1.40571e+08	9.38768e+07	1.18342e+08	27	28	28	29	27	29	33	29	34	29	30	27	28	28	29	27	29	33	29	34	29	30
E9PV24	14161	Fga	FALSE	Fibrinogen alpha chain OS=Mus musculus OX=10090 GN=Fga PE=1 SV=1	34	21	340	21	94.895	892.94	21	87.4	1.01573e+08	1.18546e+08	8.3543e+07	1.35295e+08	8.84906e+07	9.025e+07	3.37873e+07	6.15202e+07	5.63391e+07	4.4565e+07	8.16659e+07	21	21	21	21	20	21	20	21	20	21	21	21	21	21	21	20	21	20	21	20	21	21
P26350	19231	Ptma	FALSE	Prothymosin alpha OS=Mus musculus OX=10090 GN=Ptma PE=1 SV=2	43	10	339	10	66.362	1141.44	10	12.2	1.63499e+08	1.05614e+08	1.30332e+08	1.53325e+08	235293713	1.28355e+08	1.5778e+08	1.39452e+08	3.89978e+08	1.87886e+08	2.91855e+08	9	8	8	8	8	9	9	8	10	9	9	9	8	8	8	8	9	9	8	10	9	9
O35490	12116	Bhmt	FALSE	Betaine--homocysteine S-methyltransferase 1 OS=Mus musculus OX=10090 GN=Bhmt PE=1 SV=1	54	17	335	17	84.816	901.79	17	45	1.66066e+08	2.02248e+08	1.62416e+08	1.77478e+08	1.98227e+08	9.91022e+07	1.28962e+08	1.08019e+08	1.14025e+08	1.33132e+08	1.78247e+08	16	16	17	15	14	15	14	14	15	15	15	16	16	17	15	14	15	14	14	15	15	15
P61979	15387	Hnrnpk	FALSE	Heterogeneous nuclear ribonucleoprotein K OS=Mus musculus OX=10090 GN=Hnrnpk PE=1 SV=1	53	23	335	23	128.873	926.09	23	50.9	1.13193e+08	1.27499e+08	1.11706e+08	1.25246e+08	1.18534e+08	1.39292e+08	8.20527e+07	1.20376e+08	1.42342e+08	1.70553e+08	1.92228e+08	20	22	21	22	19	21	21	20	21	23	21	20	22	21	22	19	21	21	20	21	23	21
O54931	11641	Akap2	FALSE	A-kinase anchor protein 2 OS=Mus musculus OX=10090 GN=Akap2 PE=1 SV=3	46	32	333	32	173.534	938.55	32	98.5	4.84181e+07	4.36161e+07	3.64078e+07	4.61124e+07	6.24238e+07	4.76033e+07	6.11301e+07	5.56218e+07	1.00631e+08	6.25521e+07	7.89886e+07	31	30	30	30	31	30	29	31	31	30	31	31	30	30	30	31	30	29	31	31	30	31
P63158	15289	Hmgb1	FALSE	High mobility group protein B1 OS=Mus musculus OX=10090 GN=Hmgb1 PE=1 SV=2	70	22	332	20	138.346	1009.74	22	24.9	1.33547e+08	2.34687e+08	1.88488e+08	2.21089e+08	2.50815e+08	1.78757e+08	1.34374e+08	2.02004e+08	3.91552e+08	2.09359e+08	2.56577e+08	20	20	19	19	18	19	18	19	22	21	21	20	20	19	19	18	19	18	19	22	21	21
P07758	20700	Serpina1a	FALSE	Alpha-1-antitrypsin 1-1 OS=Mus musculus OX=10090 GN=Serpina1a PE=1 SV=4	54	20	327	8	116.344	1060.51	20	46	4.30755e+08	2.41004e+08	2.27164e+08	3.20131e+08	3.90743e+08	2.80703e+08	1.26053e+08	1.84848e+08	1.57124e+08	1.38365e+08	2.72146e+08	20	16	17	18	18	17	16	17	16	15	17	20	16	17	18	18	17	16	17	16	15	17
Q91WK5	68133	Gcsh	TRUE	Glycine cleavage system H protein, mitochondrial OS=Mus musculus OX=10090 GN=Gcsh PE=1 SV=2	64	5	327	5	35.327	924.17	5	18.6	5.33406e+07	5.61803e+07	5.25334e+07	8.56637e+07	6.87301e+07	8.43916e+07	1.15523e+08	1.54664e+08	2.22872e+08	1.58739e+08	1.54161e+08	4	4	4	4	4	5	4	4	4	4	5	4	4	4	4	4	5	4	4	4	4	5
Q9QYG0	29811	Ndrg2	FALSE	Protein NDRG2 OS=Mus musculus OX=10090 GN=Ndrg2 PE=1 SV=1	77	17	327	17	120.753	1004.74	17	40.8	4.25192e+07	3.41235e+08	3.6722e+08	1.9244e+08	7.09623e+07	2.92354e+08	8.6366e+07	2.06824e+08	1.95949e+08	2.13599e+08	2.02045e+08	14	17	16	16	15	16	14	15	14	15	14	14	17	16	16	15	16	14	15	14	15	14
Q91WJ8	51886	Fubp1	FALSE	Far upstream element-binding protein 1 OS=Mus musculus OX=10090 GN=Fubp1 PE=1 SV=1	50	29	322	25	152.042	861.06	29	68.5	4.42262e+07	4.09404e+07	4.06324e+07	3.28354e+07	45803961	35816445	4.93402e+07	5.64367e+07	1.22689e+08	6.44189e+07	5.99384e+07	28	27	26	26	28	27	28	27	28	27	28	28	27	26	26	28	27	28	27	28	27	28
P17742	268373	Ppia	FALSE	Peptidyl-prolyl cis-trans isomerase A OS=Mus musculus OX=10090 GN=Ppia PE=1 SV=2	76	12	318	12	91.017	829.41	12	18	1.37262e+08	2.37338e+08	2.46005e+08	1.95816e+08	2.17237e+08	3.66146e+08	1.77866e+08	2.78505e+08	3.87463e+08	4.66245e+08	3.19534e+08	10	11	12	11	12	11	11	11	12	12	11	10	11	12	11	12	11	11	11	12	12	11
Q3THE2	67938	Myl12b	FALSE	Myosin regulatory light chain 12B OS=Mus musculus OX=10090 GN=Myl12b PE=1 SV=2	80	13	316	6	108.747	967.38	13	19.8	1.25478e+08	1.6834e+08	1.77705e+08	2.11817e+08	1.50812e+08	3.36818e+08	2.27782e+08	2.05388e+08	3.69579e+08	3.25066e+08	3.49017e+08	12	12	12	12	12	12	13	12	13	12	13	12	12	12	12	12	12	13	12	13	12	13
Q99K28	77038	Arfgap2	FALSE	ADP-ribosylation factor GTPase-activating protein 2 OS=Mus musculus OX=10090 GN=Arfgap2 PE=1 SV=1	45	19	312	19	128.77	877.37	19	56.6	1.39932e+08	1.13992e+08	7.93147e+07	1.00754e+08	1.40814e+08	5.08341e+07	7.67783e+07	8.37527e+07	8.73742e+07	7.87061e+07	1.65686e+08	19	19	19	19	19	19	19	19	19	18	19	19	19	19	19	19	19	19	19	19	18	19
Q61595	16709	Ktn1	FALSE	Kinectin OS=Mus musculus OX=10090 GN=Ktn1 PE=1 SV=1	48	55	308	55	217.218	858.86	55	152.5	1.80959e+07	3.48348e+07	3.01463e+07	2.76943e+07	1.69747e+07	4.17322e+07	3.11346e+07	3.55906e+07	4.50532e+07	5.51535e+07	3.53164e+07	45	50	49	47	44	49	50	49	49	52	48	45	50	49	47	44	49	50	49	49	52	48
P08113	22027	Hsp90b1	FALSE	Endoplasmin OS=Mus musculus OX=10090 GN=Hsp90b1 PE=1 SV=2	59	42	308	40	190.799	872.68	42	92.4	3.87654e+07	1.42538e+08	1.44671e+08	9.1142e+07	4.57661e+07	1.19702e+08	2.32544e+07	3.81687e+07	6.51704e+07	1.08359e+08	9.21025e+07	25	41	41	39	28	40	26	32	34	37	37	25	41	41	39	28	40	26	32	34	37	37
P62897	13063	Cycs	TRUE	Cytochrome c, somatic OS=Mus musculus OX=10090 GN=Cycs PE=1 SV=2	68	11	305	9	63.716	878.2	11	11.6	1.87541e+08	1.51902e+08	1.34015e+08	1.31133e+08	2.72346e+08	4.22433e+08	5.5244e+08	8.06279e+08	9.49943e+08	6.95474e+08	4.33001e+08	9	9	9	9	9	9	11	11	11	11	10	9	9	9	9	9	9	11	11	11	11	10
Q9Z315	20227	Sart1	FALSE	U4/U6.U5 tri-snRNP-associated protein 1 OS=Mus musculus OX=10090 GN=Sart1 PE=1 SV=1	49	36	303	36	178.727	896.16	36	90.8	3.4743e+07	3.24072e+07	3.05258e+07	3.33073e+07	4.04762e+07	1.97441e+07	2.5191e+07	2.4743e+07	4.75735e+07	2.82244e+07	4.17963e+07	34	34	33	35	33	31	33	32	35	33	34	34	34	33	35	33	31	33	32	35	33	34
P09671	20656	Sod2	TRUE	Superoxide dismutase [Mn], mitochondrial OS=Mus musculus OX=10090 GN=Sod2 PE=1 SV=3	80	15	303	15	84.409	831.11	15	24.6	3.96291e+07	1.94019e+08	2.04375e+08	1.35544e+08	6.30003e+07	3.55416e+08	2.17467e+08	4.91307e+08	3.4905e+08	4.69749e+08	2.36257e+08	13	14	14	14	11	14	14	15	14	14	14	13	14	14	14	11	14	14	15	14	14	14
P97371	19186	Psme1	FALSE	Proteasome activator complex subunit 1 OS=Mus musculus OX=10090 GN=Psme1 PE=1 SV=2	81	23	303	23	122.562	810.19	23	28.7	3.69732e+07	2.46686e+08	2.25352e+08	1.7803e+08	5.89305e+07	2.31539e+08	7.42373e+07	1.3852e+08	2.08292e+08	1.95602e+08	2.63305e+08	18	23	23	22	19	22	21	20	22	22	22	18	23	23	22	19	22	21	20	22	22	22
Q61490	11658	Alcam	FALSE	CD166 antigen OS=Mus musculus OX=10090 GN=Alcam PE=1 SV=3	51	33	303	33	142.739	876.39	33	65.1	4.57648e+07	4.49353e+07	5.59097e+07	5.33987e+07	7.15228e+07	7.27333e+07	5.55497e+07	5.32712e+07	1.17522e+08	7.01841e+07	6.65643e+07	28	27	27	27	28	27	27	28	31	26	27	28	27	27	27	28	27	27	28	31	26	27
P55302	16976	Lrpap1	FALSE	Alpha-2-macroglobulin receptor-associated protein OS=Mus musculus OX=10090 GN=Lrpap1 PE=1 SV=1	61	29	299	29	143.557	760.44	29	42.2	9.87085e+07	9.08169e+07	8.70283e+07	8.38071e+07	1.32591e+08	6.36613e+07	7.33249e+07	7.21267e+07	1.08175e+08	5.83106e+07	1.49985e+08	29	28	28	28	28	27	29	29	28	27	28	29	28	28	28	28	27	29	29	28	27	28
Q8BK30	78330	Ndufv3	TRUE	NADH dehydrogenase [ubiquinone] flavoprotein 3, mitochondrial OS=Mus musculus OX=10090 GN=Ndufv3 PE=1 SV=1	51	5	299	5	33.73	804.04	5	11.8	7.32149e+07	4.72842e+07	4.78616e+07	5.42481e+07	8.74072e+07	8.56957e+07	1.30034e+08	1.88593e+08	1.68126e+08	1.14907e+08	1.21548e+08	5	5	5	5	5	5	5	5	5	5	5	5	5	5	5	5	5	5	5	5	5	5
P09528	14319	Fth1	TRUE	Ferritin heavy chain OS=Mus musculus OX=10090 GN=Fth1 PE=1 SV=2	71	17	298	17	148.334	772.49	17	21.1	7.98694e+07	1.72397e+08	1.66499e+08	2.19414e+08	9.40795e+07	1.53769e+08	1.92018e+08	2.15618e+08	4.39677e+08	2.50713e+08	3.63442e+08	17	17	17	17	16	16	17	17	17	17	17	17	17	17	17	16	16	17	17	17	17	17
Q6NZJ6	208643	Eif4g1	FALSE	Eukaryotic translation initiation factor 4 gamma 1 OS=Mus musculus OX=10090 GN=Eif4g1 PE=1 SV=1	34	38	298	35	211.067	825.45	38	176	7.86662e+07	7.44663e+07	6.35209e+07	6.2147e+07	8.90667e+07	4.76547e+07	4.80834e+07	6.35485e+07	6.46523e+07	7.52436e+07	9.40572e+07	35	37	35	33	34	31	31	34	29	33	35	35	37	35	33	34	31	31	34	29	33	35
E9QAT4	227648	Sec16a	FALSE	Protein transport protein Sec16A OS=Mus musculus OX=10090 GN=Sec16a PE=1 SV=1	33	43	296	43	194.218	843.92	43	254	6.31953e+07	4.01477e+07	3.81915e+07	3.9736e+07	7.04413e+07	2.24253e+07	3.77722e+07	3.64464e+07	6.40564e+07	4.44176e+07	6.34249e+07	39	37	37	36	37	27	38	37	33	35	38	39	37	37	36	37	27	38	37	33	35	38
P49710	15163	Hcls1	FALSE	Hematopoietic lineage cell-specific protein OS=Mus musculus OX=10090 GN=Hcls1 PE=1 SV=2	56	31	294	31	139.666	764.72	31	54.2	5.43539e+07	4.81451e+07	3.97559e+07	4.61971e+07	3.76623e+07	4.81278e+07	5.61026e+07	4.92587e+07	9.86945e+07	7.39894e+07	1.04291e+08	28	26	26	27	26	26	27	27	31	28	28	28	26	26	27	26	26	27	27	31	28	28
Q9ERG0	65970	Lima1	FALSE	LIM domain and actin-binding protein 1 OS=Mus musculus OX=10090 GN=Lima1 PE=1 SV=3	57	38	294	38	165.387	777.95	38	84	6.23231e+07	5.29234e+07	5.45289e+07	5.00667e+07	6.0006e+07	5.1174e+07	4.08521e+07	6.32069e+07	6.8843e+07	6.83715e+07	9.21232e+07	37	37	36	34	36	36	35	35	36	35	36	37	37	36	34	36	36	35	35	36	35	36
O08638	17880	Myh11	FALSE	Myosin-11 OS=Mus musculus OX=10090 GN=Myh11 PE=1 SV=1	29	58	294	50	258.885	858.02	58	226.9	2.03017e+07	1.88314e+07	1.90755e+07	5.93129e+07	2.19432e+07	7.37675e+07	1.48758e+07	1.11148e+07	3.51307e+07	2.11768e+07	5.01592e+07	39	38	39	54	36	55	40	25	38	33	48	39	38	39	54	36	55	40	25	38	33	48
Q9D0E1	76936	Hnrnpm	FALSE	Heterogeneous nuclear ribonucleoprotein M OS=Mus musculus OX=10090 GN=Hnrnpm PE=1 SV=3	37	22	293	21	122.71	750.49	22	77.6	3.19533e+07	4.38504e+07	3.59609e+07	3.6559e+07	3.8526e+07	3.17174e+07	2.99084e+07	4.22958e+07	6.58851e+07	5.26564e+07	6.2961e+07	20	21	20	20	21	18	20	20	20	19	21	20	21	20	20	21	18	20	20	20	19	21
Q8BWT1	52538	Acaa2	TRUE	3-ketoacyl-CoA thiolase, mitochondrial OS=Mus musculus OX=10090 GN=Acaa2 PE=1 SV=3	66	24	292	24	147.05	929.38	24	41.8	4.69336e+07	1.0801e+08	9.55588e+07	5.99343e+07	4.83658e+07	1.63366e+08	5.32222e+07	1.27594e+08	9.4482e+07	2.34128e+08	8.88909e+07	20	21	20	20	18	22	21	23	23	23	22	20	21	20	20	18	22	21	23	23	23	22
Q61792	16796	Lasp1	FALSE	LIM and SH3 domain protein 1 OS=Mus musculus OX=10090 GN=Lasp1 PE=1 SV=1	82	20	290	20	116.703	822.88	20	30	2.84395e+08	1.96192e+08	2.09089e+08	1.98421e+08	3.20795e+08	2.05646e+08	2.50136e+08	2.26259e+08	3.98682e+08	2.18759e+08	3.56228e+08	18	20	19	19	19	18	20	19	19	19	20	18	20	19	19	19	18	20	19	19	19	20
Q9CZX8	20085	Rps19	FALSE	40S ribosomal protein S19 OS=Mus musculus OX=10090 GN=Rps19 PE=1 SV=3	68	15	289	15	69.881	687.99	15	16.1	2.34998e+08	2.98067e+08	2.87013e+08	3.07946e+08	4.51378e+08	2.28988e+08	2.42409e+08	3.47092e+08	5.01558e+08	2.96504e+08	3.99881e+08	15	15	15	15	15	15	15	15	15	15	15	15	15	15	15	15	15	15	15	15	15	15
Q3UGC7	78655	Eif3j1	FALSE	Eukaryotic translation initiation factor 3 subunit J-A OS=Mus musculus OX=10090 GN=Eif3j1 PE=2 SV=1	83	26	288	26	164.331	844.85	26	29.3	6.82887e+07	8.06045e+07	8.02481e+07	9.73875e+07	8.48739e+07	1.16298e+08	9.89276e+07	1.06949e+08	1.94583e+08	1.53557e+08	1.47851e+08	24	23	23	23	21	24	25	24	25	25	24	24	23	23	23	21	24	25	24	25	25	24
Q8K3J1	225887	Ndufs8	TRUE	NADH dehydrogenase [ubiquinone] iron-sulfur protein 8, mitochondrial OS=Mus musculus OX=10090 GN=Ndufs8 PE=1 SV=1	66	12	287	12	56.683	738.7	12	24	2.24869e+07	5.19366e+07	5.15472e+07	3.98259e+07	3.56029e+07	1.47862e+08	9.02511e+07	1.80424e+08	1.57561e+08	1.58572e+08	1.016e+08	11	10	10	10	10	12	11	11	10	11	11	11	10	10	10	10	12	11	11	10	11	11
P62073	30059	Timm10	TRUE	Mitochondrial import inner membrane translocase subunit Tim10 OS=Mus musculus OX=10090 GN=Timm10 PE=1 SV=1	69	9	286	9	125.389	837.62	9	10.3	3.56109e+07	2.66111e+07	2.28101e+07	3.0183e+07	4.85921e+07	8.39707e+07	1.21971e+08	1.36993e+08	1.55047e+08	1.5097e+08	8.62712e+07	9	9	8	9	9	9	9	9	9	9	9	9	9	8	9	9	9	9	9	9	9	9
Q6AW69	68178	Cgnl1	FALSE	Cingulin-like protein 1 OS=Mus musculus OX=10090 GN=Cgnl1 PE=1 SV=2	44	51	286	50	193.619	783.83	51	148.1	3.41686e+07	2.73353e+07	2.38401e+07	2.5165e+07	3.33132e+07	1.41336e+07	1.42065e+07	1.53243e+07	2.51264e+07	2.04043e+07	3.41931e+07	49	47	44	46	48	36	42	39	44	43	45	49	47	44	46	48	36	42	39	44	43	45
Q9R269	19041	Ppl	FALSE	Periplakin OS=Mus musculus OX=10090 GN=Ppl PE=1 SV=1	43	71	286	71	242.605	746.83	71	203.9	6.03062e+06	1.13903e+07	1.21995e+07	1.09043e+07	5.90858e+06	4.61338e+07	3.57083e+07	3.02279e+07	3.316e+07	5.02445e+07	3.52181e+07	37	51	49	50	30	65	69	65	58	69	64	37	51	49	50	30	65	69	65	58	69	64
Q9WTP7	56248	Ak3	TRUE	GTP:AMP phosphotransferase AK3, mitochondrial OS=Mus musculus OX=10090 GN=Ak3 PE=1 SV=3	78	21	285	21	107.805	755.91	21	25.4	29732199	1.98704e+08	1.94789e+08	1.35954e+08	57066963	2.97369e+08	1.24525e+08	3.6067e+08	2.51638e+08	4.00726e+08	1.92464e+08	17	18	18	18	16	18	19	19	21	19	19	17	18	18	18	16	18	19	19	21	19	19
Q05816	16592	Fabp5	FALSE	Fatty acid-binding protein 5 OS=Mus musculus OX=10090 GN=Fabp5 PE=1 SV=3	85	16	285	16	115.238	812.52	16	15.1	4.67552e+07	192456229	1.73497e+08	2.48559e+08	1.58102e+08	1.46839e+08	1.04554e+08	1.47526e+08	1.62297e+08	1.29741e+08	3.43112e+08	11	15	15	15	11	14	15	15	16	13	16	11	15	15	15	11	14	15	15	16	13	16
Q8BTI8	75956	Srrm2	FALSE	Serine/arginine repetitive matrix protein 2 OS=Mus musculus OX=10090 GN=Srrm2 PE=1 SV=3	24	45	284	45	180.014	833.59	45	294.7	3.46269e+07	2.91162e+07	3.79051e+07	3.47411e+07	4.96819e+07	2.38759e+07	2.39581e+07	2.65994e+07	6.9603e+07	4.32691e+07	5.52621e+07	39	39	41	39	42	34	37	38	42	42	41	39	39	41	39	42	34	37	38	42	42	41
P15116	12558	Cdh2	FALSE	Cadherin-2 OS=Mus musculus OX=10090 GN=Cdh2 PE=1 SV=2	37	23	284	23	125.103	896.78	23	99.7	9.7774e+07	1.39497e+08	1.70696e+08	1.61162e+08	1.28103e+08	1.09493e+08	7.67008e+07	8.61856e+07	1.43587e+08	1.05794e+08	1.39301e+08	19	20	20	21	19	21	21	20	22	22	21	19	20	20	21	19	21	21	20	22	22	21
Q99MI1	111173	Erc1	FALSE	ELKS/Rab6-interacting/CAST family member 1 OS=Mus musculus OX=10090 GN=Erc1 PE=1 SV=1	42	48	281	40	185.166	747.19	48	128.3	2.71736e+07	3.64072e+07	3.39281e+07	3.37186e+07	2.79622e+07	2.31657e+07	2.1564e+07	2.4059e+07	2.76e+07	2.27545e+07	3.32141e+07	43	44	44	44	44	41	41	43	39	42	43	43	44	44	44	44	41	41	43	39	42	43
P68372	227613	Tubb4b	FALSE	Tubulin beta-4B chain OS=Mus musculus OX=10090 GN=Tubb4b PE=1 SV=1	70	23	280	3	136.972	837.22	23	49.8	3.25219e+07	1.05808e+08	1.06903e+08	7.34234e+07	3.7091e+07	1.70102e+08	4.82102e+07	7.66859e+07	9.71474e+07	1.89145e+08	1.13633e+08	15	23	22	21	15	20	17	20	20	22	23	15	23	22	21	15	20	17	20	20	22	23
Q9DB15	56282	Mrpl12	TRUE	39S ribosomal protein L12, mitochondrial OS=Mus musculus OX=10090 GN=Mrpl12 PE=1 SV=2	60	12	279	12	91.027	921.64	12	21.7	9.69785e+07	7.41232e+07	6.92815e+07	7.71179e+07	1.41553e+08	1.95427e+08	2.70527e+08	3.67136e+08	5.0169e+08	3.47479e+08	2.76252e+08	11	11	9	10	10	11	12	12	12	11	10	11	11	9	10	10	11	12	12	12	11	10
Q61335	27061	Bcap31	FALSE	B-cell receptor-associated protein 31 OS=Mus musculus OX=10090 GN=Bcap31 PE=1 SV=4	47	20	278	20	158.484	769.81	20	27.9	1.64411e+08	6.96249e+07	6.99139e+07	6.62437e+07	1.5012e+08	4.67963e+07	9.47013e+07	6.94846e+07	5.94765e+07	4.48901e+07	1.21529e+08	19	19	19	19	20	19	18	20	17	19	20	19	19	19	19	20	19	18	20	17	19	20
Q8VCI5	19298	Pex19	FALSE	Peroxisomal biogenesis factor 19 OS=Mus musculus OX=10090 GN=Pex19 PE=1 SV=1	84	18	276	18	137.972	904.26	18	32.7	5.43762e+07	6.11995e+07	5.71437e+07	6.87599e+07	7.22293e+07	7.58386e+07	7.70642e+07	7.5552e+07	1.4915e+08	1.29255e+08	1.11105e+08	15	16	15	17	16	15	18	15	18	18	17	15	16	15	17	16	15	18	15	18	18	17
Q9QZQ1	17356	Afdn	FALSE	Afadin OS=Mus musculus OX=10090 GN=Afdn PE=1 SV=3	24	40	276	40	177.29	755.45	40	206.4	5.72991e+07	3.96447e+07	3.52169e+07	3.48032e+07	5.78289e+07	1.9858e+07	3.09079e+07	3.30648e+07	4.08444e+07	3.1364e+07	5.07078e+07	36	37	36	36	37	30	33	34	34	34	35	36	37	36	36	37	30	33	34	34	34	35
P07724	11657	Alb	FALSE	Albumin OS=Mus musculus OX=10090 GN=Alb PE=1 SV=3	60	32	276	32	156.524	796.75	32	68.6	1.09372e+08	1.40285e+08	1.19017e+08	1.69153e+08	8.96436e+07	2.3487e+08	6.35036e+07	1.00177e+08	1.19793e+08	2.29764e+08	1.19683e+08	31	31	30	32	30	31	26	27	26	29	27	31	31	30	32	30	31	26	27	26	29	27
Q8VCF0	228607	Mavs	TRUE	Mitochondrial antiviral-signaling protein OS=Mus musculus OX=10090 GN=Mavs PE=1 SV=1	62	15	272	15	95.872	897.84	15	53.4	5.32794e+07	6.00257e+07	6.4248e+07	5.21844e+07	6.16801e+07	6.64489e+07	5.66634e+07	9.40912e+07	7.72564e+07	7.95476e+07	9.26231e+07	15	15	15	15	14	15	14	15	14	14	15	15	15	15	15	14	15	14	15	14	14	15
Q9QZM0	54609	Ubqln2	FALSE	Ubiquilin-2 OS=Mus musculus OX=10090 GN=Ubqln2 PE=1 SV=2	31	14	270	10	118.383	803.47	14	67.3	4.885e+06	5.70162e+06	6.00576e+06	6.88149e+06	8.22358e+06	6.89604e+06	1.00535e+07	9.57109e+06	5.07374e+07	2.57206e+07	1.1183e+07	10	9	9	9	10	9	10	9	14	12	9	10	9	9	9	10	9	10	9	14	12	9
O09044	20619	Snap23	FALSE	Synaptosomal-associated protein 23 OS=Mus musculus OX=10090 GN=Snap23 PE=1 SV=1	77	17	267	17	117.21	786.64	17	23.2	5.50674e+07	3.85579e+07	4.83521e+07	4.40381e+07	6.95891e+07	4.43892e+07	4.78939e+07	4.68283e+07	6.43162e+07	4.83178e+07	6.68352e+07	17	16	16	15	16	15	16	16	16	15	15	17	16	16	15	16	15	16	16	16	15	15
Q5XG73	74159	Acbd5	FALSE	Acyl-CoA-binding domain-containing protein 5 OS=Mus musculus OX=10090 GN=Acbd5 PE=1 SV=1	40	19	267	19	120.554	747.31	19	56.6	9.08683e+07	8.19153e+07	8.633e+07	6.45986e+07	1.28423e+08	7.17277e+07	5.96505e+07	8.51844e+07	1.07579e+08	8.36805e+07	1.17592e+08	18	18	17	18	17	18	17	18	18	18	18	18	18	17	18	17	18	17	18	18	18	18
Q9CXZ1	17993	Ndufs4	TRUE	NADH dehydrogenase [ubiquinone] iron-sulfur protein 4, mitochondrial OS=Mus musculus OX=10090 GN=Ndufs4 PE=1 SV=3	58	13	267	13	86.332	765.6	13	19.8	8.75775e+07	6.67966e+07	5.62012e+07	5.8801e+07	1.1945e+08	1.16597e+08	1.37597e+08	2.14003e+08	1.77936e+08	1.41869e+08	1.62963e+08	13	13	13	13	13	13	13	13	13	13	13	13	13	13	13	13	13	13	13	13	13	13
P99028	66576	Uqcrh	TRUE	Cytochrome b-c1 complex subunit 6, mitochondrial OS=Mus musculus OX=10090 GN=Uqcrh PE=1 SV=2	83	10	267	10	53.146	751.04	10	10.4	1.31603e+08	1.14588e+08	7.81225e+07	1.76619e+08	1.76308e+08	3.48798e+08	3.12671e+08	3.78594e+08	4.5746e+08	3.62449e+08	2.5928e+08	10	9	9	9	10	10	10	10	10	10	10	10	9	9	9	10	10	10	10	10	10	10
P97855	27041	G3bp1	FALSE	Ras GTPase-activating protein-binding protein 1 OS=Mus musculus OX=10090 GN=G3bp1 PE=1 SV=1	52	20	265	19	133.971	788.11	20	51.8	4.05505e+07	6.34917e+07	6.30284e+07	4.64864e+07	4.58753e+07	6.56683e+07	4.6402e+07	6.86676e+07	1.02291e+08	9.12132e+07	6.80659e+07	18	19	20	19	19	18	19	19	20	19	20	18	19	20	19	19	18	19	19	20	19	20
Q00897	20703	Serpina1d	FALSE	Alpha-1-antitrypsin 1-4 OS=Mus musculus OX=10090 GN=Serpina1d PE=1 SV=1	61	20	262	8	118.526	813.08	20	46	8.16534e+07	4.52217e+07	4.0259e+07	49157364	3.62118e+07	4.75596e+07	4.00287e+07	2.96486e+07	2.02311e+07	2.42175e+07	3.82142e+07	18	18	18	19	18	18	17	16	17	18	18	18	18	18	19	18	18	17	16	17	18	18
Q8BMK4	216197	Ckap4	FALSE	Cytoskeleton-associated protein 4 OS=Mus musculus OX=10090 GN=Ckap4 PE=1 SV=2	66	34	261	34	151.274	744.73	34	63.7	2.21985e+07	2.69945e+07	2.97953e+07	3.27553e+07	2.56553e+07	4.39419e+07	3.66529e+07	2.70445e+07	5.32154e+07	3.17425e+07	4.95556e+07	30	31	30	31	30	31	31	31	33	30	34	30	31	30	31	30	31	31	31	33	30	34
Q9WVA4	21346	Tagln2	FALSE	Transgelin-2 OS=Mus musculus OX=10090 GN=Tagln2 PE=1 SV=4	84	17	260	17	103.742	683.68	17	22.4	3.22935e+07	8.14962e+07	7.99368e+07	9.63192e+07	5.58598e+07	1.84891e+08	8.66058e+07	8.94553e+07	3.40705e+08	1.76149e+08	1.511e+08	14	15	15	15	15	15	16	15	16	17	17	14	15	15	15	15	15	16	15	16	17	17
P22599	20701	Serpina1b	FALSE	Alpha-1-antitrypsin 1-2 OS=Mus musculus OX=10090 GN=Serpina1b PE=1 SV=2	57	17	260	6	114.713	846.23	17	45.9	1.39443e+07	2.01913e+07	1.58561e+07	2.59284e+07	1.2965e+07	2.82456e+07	9.79395e+06	1.70764e+07	2.05522e+07	1.83797e+07	2.11612e+07	16	15	16	17	16	16	14	15	15	16	16	16	15	16	17	16	16	14	15	15	16	16
Q99020	15384	Hnrnpab	FALSE	Heterogeneous nuclear ribonucleoprotein A/B OS=Mus musculus OX=10090 GN=Hnrnpab PE=1 SV=1	49	22	259	21	98.553	673.62	22	30.8	1.08192e+08	1.06967e+08	8.9479e+07	1.03202e+08	1.39181e+08	1.01579e+08	1.06777e+08	1.36645e+08	3.0139e+08	1.74807e+08	1.82016e+08	20	19	18	20	20	19	21	19	22	21	21	20	19	18	20	20	19	21	19	22	21	21
Q9CQ19	98932	Myl9	FALSE	Myosin regulatory light polypeptide 9 OS=Mus musculus OX=10090 GN=Myl9 PE=1 SV=3	80	13	258	6	105.992	765.13	13	19.8	3.09515e+06	4.68814e+06	5.04242e+06	1.82719e+07	3.45447e+06	3.1804e+07	8.66277e+06	5.77508e+06	1.46934e+07	1.19075e+07	1.69638e+07	11	10	10	12	11	12	12	11	13	11	13	11	10	10	12	11	12	12	11	13	11	13
P56959	233908	Fus	FALSE	RNA-binding protein FUS OS=Mus musculus OX=10090 GN=Fus PE=1 SV=1	28	15	257	15	110.141	708.3	15	52.6	1.55463e+08	1.20851e+08	1.07143e+08	1.24756e+08	1.71012e+08	6.73797e+07	1.28275e+08	1.47343e+08	2.46802e+08	1.30198e+08	1.96284e+08	13	15	13	14	13	12	15	13	15	15	15	13	15	13	14	13	12	15	13	15	15	15
P56480	11947	Atp5b	TRUE	ATP synthase subunit beta, mitochondrial OS=Mus musculus OX=10090 GN=Atp5f1b PE=1 SV=2	60	21	255	21	140.14	791.9	21	56.3	4.94913e+07	6.3641e+07	7.94192e+07	7.00793e+07	7.74774e+07	1.58826e+08	1.27535e+08	2.08526e+08	2.9073e+08	2.64539e+08	1.65015e+08	17	20	21	19	16	20	19	19	20	21	17	17	20	21	19	16	20	19	19	20	21	17
Q9R0A0	56273	Pex14	FALSE	Peroxisomal membrane protein PEX14 OS=Mus musculus OX=10090 GN=Pex14 PE=1 SV=1	86	21	255	21	118.358	839.02	21	41.2	9.02844e+07	7.32541e+07	9.10751e+07	7.48746e+07	1.4675e+08	6.51059e+07	8.717e+07	9.93147e+07	1.65411e+08	1.03169e+08	1.24944e+08	19	19	18	20	19	18	20	19	20	18	21	19	19	18	20	19	18	20	19	20	18	21
Q61029	21917	Tmpo	FALSE	Lamina-associated polypeptide 2, isoforms beta/delta/epsilon/gamma OS=Mus musculus OX=10090 GN=Tmpo PE=1 SV=4	63	22	253	11	122.83	845.59	22	50.3	9.70837e+07	9.20499e+07	8.5988e+07	9.8332e+07	1.32258e+08	9.64772e+07	1.00333e+08	9.46288e+07	1.87076e+08	1.02135e+08	1.60964e+08	22	22	22	22	22	22	22	22	22	22	22	22	22	22	22	22	22	22	22	22	22	22
O88569	53379	Hnrnpa2b1	FALSE	Heterogeneous nuclear ribonucleoproteins A2/B1 OS=Mus musculus OX=10090 GN=Hnrnpa2b1 PE=1 SV=2	70	28	252	24	145.519	755.89	28	37.4	1.28133e+08	1.2634e+08	1.25261e+08	1.23116e+08	1.65972e+08	8.83834e+07	6.83933e+07	9.90511e+07	1.47902e+08	1.46495e+08	1.55813e+08	25	24	26	23	25	23	24	24	25	26	27	25	24	26	23	25	23	24	24	25	26	27
Q921M4	99412	Golga2	FALSE	Golgin subfamily A member 2 OS=Mus musculus OX=10090 GN=Golga2 PE=1 SV=3	53	37	251	37	160.031	735.91	37	113.2	1.90344e+07	2.28761e+07	2.29805e+07	2.39625e+07	1.74953e+07	2.47917e+07	1.59523e+07	1.67393e+07	2.68671e+07	2.50475e+07	2.62296e+07	31	34	34	35	29	34	31	32	32	34	33	31	34	34	35	29	34	31	32	32	34	33
Q62418	13169	Dbnl	FALSE	Drebrin-like protein OS=Mus musculus OX=10090 GN=Dbnl PE=1 SV=2	54	24	249	24	97.732	643.31	24	48.7	5.13879e+07	5.6083e+07	5.65815e+07	6.08601e+07	5.8308e+07	6.44749e+07	6.82365e+07	7.21238e+07	1.21767e+08	9.26936e+07	9.92297e+07	24	23	24	24	24	24	24	24	24	24	24	24	23	24	24	24	24	24	24	24	24	24
Q8BP92	26611	Rcn2	FALSE	Reticulocalbin-2 OS=Mus musculus OX=10090 GN=Rcn2 PE=1 SV=1	64	19	248	19	113.933	710.44	19	37.2	1.81062e+07	2.59635e+07	2.58456e+07	2.84711e+07	2.04144e+07	3.40263e+07	3.93162e+07	3.50173e+07	7.73936e+07	4.84253e+07	6.52435e+07	18	18	18	16	17	17	18	18	17	17	18	18	18	18	16	17	17	18	18	17	17	18
Q3UHX2	231887	Pdap1	FALSE	28 kDa heat- and acid-stable phosphoprotein OS=Mus musculus OX=10090 GN=Pdap1 PE=1 SV=1	60	18	248	18	78.066	733.16	18	20.6	1.09378e+08	7.30056e+07	6.38493e+07	8.52741e+07	1.2735e+08	6.74343e+07	9.9693e+07	9.62191e+07	1.8437e+08	1.13719e+08	1.34631e+08	16	15	15	16	14	13	17	16	17	16	16	16	15	15	16	14	13	17	16	17	16	16
P99024	22154	Tubb5	FALSE	Tubulin beta-5 chain OS=Mus musculus OX=10090 GN=Tubb5 PE=1 SV=1	70	23	247	4	130.704	733.03	23	49.6	2.66632e+06	4.89831e+06	4.00152e+06	3.7783e+06	2.68748e+06	1.02305e+07	6.21734e+06	3.79209e+06	8.35962e+06	1.38941e+07	9.19551e+06	13	22	21	20	14	20	18	20	20	22	22	13	22	21	20	14	20	18	20	20	22	22
Q9CQH7	70533	Btf3l4	FALSE	Transcription factor BTF3 homolog 4 OS=Mus musculus OX=10090 GN=Btf3l4 PE=1 SV=1	73	12	243	11	81.709	835.74	12	17.3	1.28919e+08	7.83839e+07	7.9244e+07	9.01105e+07	1.74654e+08	5.26594e+07	9.23604e+07	9.35836e+07	1.22802e+08	8.45521e+07	1.42351e+08	11	11	11	11	12	10	12	11	11	12	12	11	11	11	11	12	10	12	11	11	12	12
Q6PDM2	110809	Srsf1	FALSE	Serine/arginine-rich splicing factor 1 OS=Mus musculus OX=10090 GN=Srsf1 PE=1 SV=3	55	20	243	20	82.67	631.64	20	27.7	6.16619e+07	5.06378e+07	5.45115e+07	4.80131e+07	9.25951e+07	4.37734e+07	3.8027e+07	4.81581e+07	1.32644e+08	7.22617e+07	1.0808e+08	19	17	17	19	19	18	17	19	19	19	19	19	17	17	19	19	18	17	19	19	19	19
Q8BWS5	243385	Gprin3	FALSE	G protein-regulated inducer of neurite outgrowth 3 OS=Mus musculus OX=10090 GN=Gprin3 PE=1 SV=1	64	35	242	35	167.133	708.19	35	80.4	4.40429e+07	2.80404e+07	2.91651e+07	2.59919e+07	6.85903e+07	2.06134e+07	2.37098e+07	2.95681e+07	2.65059e+07	1.95225e+07	4.18567e+07	34	30	30	29	33	28	30	31	27	29	32	34	30	30	29	33	28	30	31	27	29	32
P39447	21872	Tjp1	FALSE	Tight junction protein ZO-1 OS=Mus musculus OX=10090 GN=Tjp1 PE=1 SV=2	30	35	241	35	163.594	677.5	35	194.6	4.21163e+07	3.69962e+07	3.40013e+07	3.62011e+07	4.04665e+07	2.90091e+07	3.49277e+07	4.25943e+07	5.92506e+07	4.77154e+07	5.73276e+07	30	31	32	32	30	29	30	31	31	32	32	30	31	32	32	30	29	30	31	31	32	32
Q7TMM9	22151	Tubb2a	FALSE	Tubulin beta-2A chain OS=Mus musculus OX=10090 GN=Tubb2a PE=1 SV=1	70	23	240	5	130.771	711.08	23	49.9	9.21769e+06	2.47415e+07	2.24192e+07	1.96927e+07	1.02645e+07	3.83906e+07	1.74355e+07	2.0364e+07	3.35387e+07	4.62701e+07	3.43039e+07	14	22	21	21	15	20	17	20	20	22	22	14	22	21	21	15	20	17	20	20	22	22
P62984	22186	Uba52	FALSE	Ubiquitin-60S ribosomal protein L40 OS=Mus musculus OX=10090 GN=Uba52 PE=1 SV=2	64	12	240	1	50.066	624.54	12	14.7	33191.2	47653.8	17836.1	74865.6	95378.4	29322.3	22219.3	32994.6	64466.9	26209.1	41120.6	12	10	12	11	11	11	12	11	12	12	12	12	10	12	11	11	11	12	11	12	12	12
Q9CR98	66488	Fam136a	TRUE	Protein FAM136A OS=Mus musculus OX=10090 GN=Fam136a PE=1 SV=1	88	15	240	15	73.317	554.01	15	15.7	1.45806e+08	1.39391e+08	1.41125e+08	1.55697e+08	1.76986e+08	1.55594e+08	2.71815e+08	3.16044e+08	4.00873e+08	3.15787e+08	3.12425e+08	13	13	13	15	14	15	13	14	14	13	14	13	13	13	15	14	15	13	14	14	13	14
P07309	22139	Ttr	FALSE	Transthyretin OS=Mus musculus OX=10090 GN=Ttr PE=1 SV=1	69	9	240	9	55.868	700.72	9	15.8	3.00214e+08	2.41233e+08	2.52524e+08	3.34478e+08	4.37116e+08	2.50094e+08	2.14533e+08	2.92259e+08	4.26294e+08	2.84884e+08	6.39904e+08	8	7	7	7	8	8	8	8	8	7	8	8	7	7	7	8	8	8	8	8	7	8
P12787	12858	Cox5a	TRUE	Cytochrome c oxidase subunit 5A, mitochondrial OS=Mus musculus OX=10090 GN=Cox5a PE=1 SV=2	63	11	240	11	64.438	741.61	11	16.1	2.24653e+08	3.31367e+08	3.22445e+08	3.38583e+08	3.7726e+08	2.29905e+08	1.5283e+08	1.26105e+08	4.80537e+08	3.26567e+08	4.16717e+08	10	10	11	10	11	10	10	10	11	10	10	10	10	11	10	11	10	10	10	11	10	10
Q64523	319176	H2ac20	FALSE	Histone H2A type 2-C OS=Mus musculus OX=10090 GN=H2ac20 PE=1 SV=3	64	10	239	2	54.401	600.34	10	14	2.95647e+08	9.25755e+08	8.29975e+08	7.36007e+08	8.10984e+08	1.0796e+09	2.68529e+08	6.64199e+08	9.37248e+08	1.38672e+09	8.03886e+08	9	10	10	10	10	9	9	9	9	10	9	9	10	10	10	10	9	9	9	9	10	9
P97461	20103	Rps5	FALSE	40S ribosomal protein S5 OS=Mus musculus OX=10090 GN=Rps5 PE=1 SV=3	62	13	238	13	67.482	669.42	13	22.9	1.69514e+07	5.43961e+07	5.90944e+07	4.84165e+07	3.18023e+07	5.3203e+07	3.42378e+07	5.40916e+07	8.79851e+07	6.43519e+07	5.60527e+07	12	12	13	12	12	12	13	13	13	12	12	12	12	13	12	12	12	13	13	13	12	12
P62983	78294	Rps27a	FALSE	Ubiquitin-40S ribosomal protein S27a OS=Mus musculus OX=10090 GN=Rps27a PE=1 SV=2	58	12	238	1	57.236	627.92	12	17.9	3.16419e+08	3.03151e+08	2.8859e+08	3.14857e+08	5.84146e+08	3.20481e+08	2.71901e+08	3.03262e+08	4.1842e+08	2.69556e+08	2.81811e+08	12	10	12	11	11	11	11	10	11	11	12	12	10	12	11	11	11	11	10	11	11	12
P48428	21371	Tbca	FALSE	Tubulin-specific chaperone A OS=Mus musculus OX=10090 GN=Tbca PE=1 SV=3	71	17	238	17	110.989	776.23	17	12.8	8.71726e+07	6.53483e+07	6.95018e+07	7.53857e+07	9.36511e+07	6.53421e+07	7.74877e+07	8.0501e+07	1.57011e+08	1.08356e+08	1.4712e+08	17	17	17	17	17	17	17	17	16	17	17	17	17	17	17	17	17	17	17	16	17	17
Q8K5B2	193813	Mcfd2	FALSE	Multiple coagulation factor deficiency protein 2 homolog OS=Mus musculus OX=10090 GN=Mcfd2 PE=1 SV=1	69	6	237	6	81.039	906.46	6	16.2	6.35214e+07	5.19501e+07	5.93837e+07	7.04627e+07	9.93302e+07	3.79708e+07	3.39903e+07	4.91129e+07	7.16104e+07	7.53195e+07	1.39834e+08	6	6	6	6	6	6	6	5	5	6	6	6	6	6	6	6	6	6	5	5	6	6
Q63918	20324	Cavin2	FALSE	Caveolae-associated protein 2 OS=Mus musculus OX=10090 GN=Cavin2 PE=1 SV=3	70	25	236	25	117.788	640.56	25	46.7	3.76652e+07	3.79691e+07	4.0507e+07	6.41016e+07	5.96073e+07	8.84293e+07	4.39829e+07	5.20483e+07	9.14518e+07	4.90576e+07	8.80544e+07	21	21	19	24	24	24	22	22	23	22	23	21	21	19	24	24	24	22	22	23	22	23
Q01149	12843	Col1a2	FALSE	Collagen alpha-2(I) chain OS=Mus musculus OX=10090 GN=Col1a2 PE=1 SV=2	20	21	236	21	97.554	688.61	21	129.5	1.82634e+08	1.50589e+08	1.8307e+08	4.64281e+08	2.95244e+08	1.0429e+09	1.79578e+08	2.07763e+08	3.90592e+08	1.70372e+08	4.08945e+08	17	17	18	20	17	21	16	17	18	17	17	17	17	18	20	17	21	16	17	18	17	17
Q61879	77579	Myh10	FALSE	Myosin-10 OS=Mus musculus OX=10090 GN=Myh10 PE=1 SV=2	19	36	236	30	155.346	701.16	36	228.9	1.70949e+07	8.11489e+06	7.24461e+06	9.62701e+06	1.67981e+07	1.50119e+07	1.42177e+07	1.19779e+07	2.12504e+07	1.13747e+07	1.63448e+07	33	31	29	28	32	32	35	30	31	30	32	33	31	29	28	32	32	35	30	31	30	32
Q9QXT0	56530	Cnpy2	FALSE	Protein canopy homolog 2 OS=Mus musculus OX=10090 GN=Cnpy2 PE=1 SV=1	77	16	234	16	81.213	625.7	16	20.8	1.04762e+08	1.38321e+08	1.43451e+08	1.89569e+08	1.36041e+08	1.16258e+08	1.12683e+08	1.22413e+08	1.47672e+08	1.26242e+08	1.72163e+08	14	15	13	15	15	15	13	15	15	14	15	14	15	13	15	15	15	13	15	15	14	15
Q64152	218490	Btf3	FALSE	Transcription factor BTF3 OS=Mus musculus OX=10090 GN=Btf3 PE=1 SV=3	72	12	234	11	91.367	779.2	12	22	1.08473e+08	6.91596e+07	6.54784e+07	7.32484e+07	1.18566e+08	5.14775e+07	9.1958e+07	8.32478e+07	1.82176e+08	8.57449e+07	1.33373e+08	12	11	11	11	12	11	12	11	12	12	12	12	11	11	11	12	11	12	11	12	12	12
Q8BG05	229279	Hnrnpa3	FALSE	Heterogeneous nuclear ribonucleoprotein A3 OS=Mus musculus OX=10090 GN=Hnrnpa3 PE=1 SV=1	47	23	233	22	120.222	678.32	23	39.6	6.72253e+07	6.85411e+07	6.28198e+07	6.77907e+07	8.26635e+07	53460876	4.3797e+07	6.74076e+07	1.08258e+08	9.5944e+07	1.03636e+08	21	21	21	21	21	21	21	21	23	22	22	21	21	21	21	21	21	21	21	23	22	22
O35143	11983	Atpif1	TRUE	ATPase inhibitor, mitochondrial OS=Mus musculus OX=10090 GN=Atp5if1 PE=1 SV=2	41	9	231	9	39.652	517.92	9	12.2	1.00018e+07	8.35149e+06	7.80299e+06	1.4237e+07	1.43147e+07	1.3162e+07	1.40135e+07	9.73351e+06	5.10023e+07	2.83976e+07	2.91185e+07	8	6	7	6	6	8	8	8	9	9	9	8	6	7	6	6	8	8	8	9	9	9
P23116	13669	Eif3a	FALSE	Eukaryotic translation initiation factor 3 subunit A OS=Mus musculus OX=10090 GN=Eif3a PE=1 SV=5	28	44	228	44	133.739	500.78	44	161.8	5.16206e+07	2.864e+07	2.52275e+07	2.9802e+07	4.19532e+07	2.17123e+07	2.53751e+07	2.84694e+07	3.84684e+07	3.23288e+07	4.53767e+07	43	38	40	42	40	42	40	40	42	40	41	43	38	40	42	40	42	40	40	42	40	41
P48678	16905	Lmna	FALSE	Prelamin-A/C OS=Mus musculus OX=10090 GN=Lmna PE=1 SV=2	61	36	228	35	159.404	631.63	36	74.2	2.89964e+07	4.91467e+07	4.39478e+07	3.8463e+07	3.27509e+07	5.82454e+07	2.07199e+07	3.65638e+07	4.27667e+07	6.25664e+07	4.46459e+07	32	31	32	32	29	35	24	32	33	35	30	32	31	32	32	29	35	24	32	33	35	30
P31001	13346	Des	FALSE	Desmin OS=Mus musculus OX=10090 GN=Des PE=1 SV=3	72	34	228	29	147.26	666.21	34	53.5	6.15483e+06	2.603e+07	1.89728e+07	2.50043e+07	6.54252e+06	8.1339e+07	1.45046e+07	2.06613e+07	2.71646e+07	3.00326e+07	2.64658e+07	26	32	30	30	28	33	31	29	30	31	31	26	32	30	30	28	33	31	29	30	31	31
Q60605	17904	Myl6	FALSE	Myosin light polypeptide 6 OS=Mus musculus OX=10090 GN=Myl6 PE=1 SV=3	75	13	226	9	81.799	629.3	13	16.9	1.52604e+08	2.43967e+08	2.56004e+08	3.78952e+08	2.29665e+08	5.40021e+08	3.39262e+08	2.85555e+08	7.0814e+08	5.49911e+08	5.4006e+08	12	12	12	12	12	12	12	12	13	13	12	12	12	12	12	12	12	12	12	13	13	12
Q9JLQ0	12488	Cd2ap	FALSE	CD2-associated protein OS=Mus musculus OX=10090 GN=Cd2ap PE=1 SV=3	52	26	225	26	121.942	646.91	26	70.4	2.57818e+07	3.16617e+07	2.55764e+07	2.59732e+07	2.49621e+07	2.95192e+07	3.01059e+07	3.6245e+07	6.18197e+07	4.39683e+07	5.15907e+07	22	25	24	24	24	22	24	24	26	24	24	22	25	24	24	24	22	24	24	26	24	24
Q99KJ8	69654	Dctn2	FALSE	Dynactin subunit 2 OS=Mus musculus OX=10090 GN=Dctn2 PE=1 SV=3	69	22	225	22	124.184	698.3	22	44.1	5.09939e+07	6.90384e+07	7.35653e+07	6.75503e+07	5.49328e+07	9.29755e+07	7.0803e+07	7.4947e+07	1.23269e+08	8.12586e+07	1.07975e+08	20	20	20	20	19	20	21	20	21	20	20	20	20	20	20	19	20	21	20	21	20	20
P15864	50708	H1f2	FALSE	Histone H1.2 OS=Mus musculus OX=10090 GN=H1-2 PE=1 SV=2	50	15	225	5	62.949	640.71	15	21.3	7.12101e+07	3.23188e+08	2.2022e+08	2.52057e+08	1.32852e+08	2.85882e+08	1.11062e+08	2.32038e+08	3.93872e+08	3.52322e+08	2.73242e+08	11	15	13	13	12	13	14	14	15	15	13	11	15	13	13	12	13	14	14	15	15	13
Q62165	13138	Dag1	FALSE	Dystroglycan 1 OS=Mus musculus OX=10090 GN=Dag1 PE=1 SV=4	19	16	223	16	91.28	648.62	16	96.8	4.59282e+07	4.47749e+07	4.66017e+07	4.86011e+07	7.43936e+07	4.8413e+07	4.46246e+07	5.84511e+07	6.58683e+07	4.46219e+07	7.89073e+07	16	15	15	15	15	15	16	16	15	15	15	16	15	15	15	15	15	16	16	15	15	15
P54728	19359	Rad23b	FALSE	UV excision repair protein RAD23 homolog B OS=Mus musculus OX=10090 GN=Rad23b PE=1 SV=2	54	18	223	16	97.227	626.61	18	43.5	1.59136e+08	1.18254e+08	1.37108e+08	1.42334e+08	1.73092e+08	1.1848e+08	1.31297e+08	1.42597e+08	2.48023e+08	1.42774e+08	228972693	16	16	16	16	15	15	17	16	18	17	17	16	16	16	16	15	15	17	16	18	17	17
P59325	217869	Eif5	FALSE	Eukaryotic translation initiation factor 5 OS=Mus musculus OX=10090 GN=Eif5 PE=1 SV=1	53	24	223	24	124.293	608.81	24	48.9	1.41213e+07	5.4411e+07	5.44973e+07	4.23096e+07	2.1307e+07	8.10013e+07	4.0036e+07	7.49508e+07	8.56968e+07	7.4219e+07	5.09439e+07	18	22	22	21	20	21	21	21	23	22	21	18	22	22	21	20	21	21	21	23	22	21
Q9JKB3	56449	Ybx3	FALSE	Y-box-binding protein 3 OS=Mus musculus OX=10090 GN=Ybx3 PE=1 SV=2	53	16	220	10	90.77	674.55	16	38.8	8.18009e+06	6.08848e+06	7.5756e+06	8.93242e+06	8.32954e+06	8.6852e+06	1.38694e+07	1.41518e+07	2.77316e+07	1.56363e+07	1.56661e+07	15	14	15	14	13	14	15	15	16	16	15	15	14	15	14	13	14	15	15	16	16	15
Q922Q8	98238	Lrrc59	FALSE	Leucine-rich repeat-containing protein 59 OS=Mus musculus OX=10090 GN=Lrrc59 PE=1 SV=1	56	16	220	16	77.019	668.35	16	34.9	1.13451e+08	2.1792e+08	2.10708e+08	1.62427e+08	1.52275e+08	1.38551e+08	1.12734e+08	1.75941e+08	2.09886e+08	1.89776e+08	1.65749e+08	15	15	15	15	15	15	15	15	16	14	15	15	15	15	15	15	15	15	15	16	14	15
P26231	12385	Ctnna1	FALSE	Catenin alpha-1 OS=Mus musculus OX=10090 GN=Ctnna1 PE=1 SV=1	59	38	220	30	179.293	658.58	38	100	1.93227e+06	4.88738e+07	4.67472e+07	2.57736e+07	3.00071e+06	5.58362e+07	8.84228e+06	3.05665e+07	2.25945e+07	5.11553e+07	2.39372e+07	15	37	36	36	17	35	26	36	31	37	34	15	37	36	36	17	35	26	36	31	37	34
O70400	54132	Pdlim1	FALSE	PDZ and LIM domain protein 1 OS=Mus musculus OX=10090 GN=Pdlim1 PE=1 SV=4	83	23	219	23	127.465	683.9	23	35.8	5.64304e+07	6.54934e+07	6.74498e+07	7.67839e+07	5.43672e+07	8.18061e+07	7.40538e+07	7.68817e+07	1.19007e+08	80609095	1.20583e+08	18	19	19	20	18	20	20	20	21	18	21	18	19	19	20	18	20	20	20	21	18	21
Q9CYZ2	66314	Tpd52l2	FALSE	Tumor protein D54 OS=Mus musculus OX=10090 GN=Tpd52l2 PE=1 SV=1	55	15	217	15	73.8	679.63	15	24	1.30151e+08	1.10912e+08	1.19572e+08	1.32185e+08	1.6532e+08	9.59392e+07	1.11733e+08	1.09904e+08	2.5657e+08	1.33785e+08	2.04472e+08	15	14	15	14	14	15	15	15	15	15	15	15	14	15	14	14	15	15	15	15	15	15
Q99JF8	101739	Psip1	FALSE	PC4 and SFRS1-interacting protein OS=Mus musculus OX=10090 GN=Psip1 PE=1 SV=1	37	21	216	19	95.789	613.17	21	59.7	2.4377e+07	1.62708e+07	1.3515e+07	1.69835e+07	3.4498e+07	1.21034e+07	1.71209e+07	1.90926e+07	3.68616e+07	1.72826e+07	2.93692e+07	20	20	19	19	21	18	19	19	18	18	19	20	20	19	19	21	18	19	19	18	18	19
Q8CI51	56376	Pdlim5	FALSE	PDZ and LIM domain protein 5 OS=Mus musculus OX=10090 GN=Pdlim5 PE=1 SV=4	43	19	214	19	118.476	683.27	19	63.3	4.33536e+07	3.95631e+07	2.92117e+07	3.17911e+07	4.25288e+07	2.42557e+07	2.51955e+07	2.8809e+07	3.67059e+07	2.68711e+07	5.12764e+07	18	18	18	19	19	16	19	19	19	18	19	18	18	18	19	19	16	19	19	19	18	19
Q9CRB9	66075	Chchd3	TRUE	MICOS complex subunit Mic19 OS=Mus musculus OX=10090 GN=Chchd3 PE=1 SV=1	53	19	213	19	83.483	559.13	19	26.3	7.95457e+07	7.95953e+07	9.21781e+07	6.56715e+07	9.35383e+07	1.64568e+08	1.37647e+08	1.97251e+08	2.29935e+08	2.27792e+08	1.35986e+08	15	16	17	15	16	16	19	17	19	19	18	15	16	17	15	16	16	19	17	19	19	18
Q9JHJ0	50875	Tmod3	FALSE	Tropomodulin-3 OS=Mus musculus OX=10090 GN=Tmod3 PE=1 SV=1	60	21	212	20	103.705	584.99	21	39.5	1.97953e+07	3.88678e+07	3.54353e+07	3.53653e+07	2.33025e+07	5.68341e+07	3.6923e+07	4.70142e+07	6.69502e+07	5.38455e+07	5.38196e+07	18	19	18	19	18	19	20	19	21	20	21	18	19	18	19	18	19	20	19	21	20	21
Q91WK0	71268	Lrrfip2	FALSE	Leucine-rich repeat flightless-interacting protein 2 OS=Mus musculus OX=10090 GN=Lrrfip2 PE=1 SV=1	49	23	211	22	131.211	654.14	23	47.1	5.03259e+07	3.82749e+07	3.17942e+07	3.55663e+07	5.61435e+07	3.19099e+07	4.10843e+07	4.1145e+07	6.55804e+07	4.60513e+07	6.47853e+07	21	21	21	20	21	21	20	21	19	21	21	21	21	21	20	21	21	20	21	19	21	21
Q06890	12759	Clu	FALSE	Clusterin OS=Mus musculus OX=10090 GN=Clu PE=1 SV=1	41	23	210	23	94.354	566.43	23	51.6	1.06572e+08	5.7976e+07	5.40988e+07	8.04607e+07	1.03664e+08	1.04108e+08	9.211e+07	7.15578e+07	1.5149e+08	1.19097e+08	1.34498e+08	20	20	18	21	19	20	20	20	22	20	20	20	20	18	21	19	20	20	20	22	20	20
P11589	17841	Mup2	FALSE	Major urinary protein 2 OS=Mus musculus OX=10090 GN=Mup2 PE=1 SV=1	69	15	210	5	99.788	615.46	15	20.7	2.72743e+08	1.72797e+08	2.03666e+08	1.96051e+08	220663044	1.32484e+07	5.80407e+06	7.18577e+06	713047	752045	1.44642e+07	15	15	15	15	14	10	11	11	2	5	11	15	15	15	15	14	10	11	11	2	5	11
Q91XC8	223453	Dap	FALSE	Death-associated protein 1 OS=Mus musculus OX=10090 GN=Dap PE=1 SV=3	66	4	210	4	47.787	553.61	4	11.1	3.19168e+07	3.26505e+07	3.08254e+07	3.92412e+07	4.43183e+07	2.59279e+07	3.78216e+07	4.13934e+07	4.65398e+07	3.37871e+07	4.46434e+07	4	4	4	4	4	4	4	4	4	4	4	4	4	4	4	4	4	4	4	4	4	4
O08677	16644	Kng1	FALSE	Kininogen-1 OS=Mus musculus OX=10090 GN=Kng1 PE=1 SV=1	38	22	208	22	99.506	523.79	22	73.1	9.14735e+07	9.19441e+07	9.00627e+07	1.74596e+08	7.55308e+07	1.59827e+08	6.71186e+07	8.11671e+07	8.27849e+07	9.3605e+07	1.02497e+08	21	20	19	22	20	19	18	19	19	19	20	21	20	19	22	20	19	18	19	19	19	20
P43277	14957	H1f3	FALSE	Histone H1.3 OS=Mus musculus OX=10090 GN=H1-3 PE=1 SV=2	47	14	208	1	58.362	577.47	14	22.1	3.8471e+06	1.52636e+07	9.42731e+06	1.28413e+07	6.95232e+06	1.59939e+07	7.37863e+06	1.15179e+07	2.1474e+07	1.9339e+07	1.41609e+07	11	14	13	13	13	13	14	14	14	14	12	11	14	13	13	13	13	14	14	14	14	12
Q3UJU9	67809	Rmdn3	TRUE	Regulator of microtubule dynamics protein 3 OS=Mus musculus OX=10090 GN=Rmdn3 PE=1 SV=2	55	21	207	21	103.619	603.24	21	52	1.17013e+07	6.13307e+07	7.31245e+07	4.5627e+07	2.03008e+07	5.36312e+07	2.86226e+07	6.6491e+07	4.54011e+07	6.03312e+07	5.10907e+07	14	19	20	19	17	18	17	19	18	19	19	14	19	20	19	17	18	17	19	18	19	19
Q9JKR6	12282	Hyou1	FALSE	Hypoxia up-regulated protein 1 OS=Mus musculus OX=10090 GN=Hyou1 PE=1 SV=1	45	31	207	31	171.415	607.76	31	111.1	6.07085e+07	4.08598e+07	4.05504e+07	4.71245e+07	5.50337e+07	3.19574e+07	2.67936e+07	2.91624e+07	4.02885e+07	3.93112e+07	5.84303e+07	24	30	29	27	23	26	22	20	23	25	26	24	30	29	27	23	26	22	20	23	25	26
Q569Z6	230753	Thrap3	FALSE	Thyroid hormone receptor-associated protein 3 OS=Mus musculus OX=10090 GN=Thrap3 PE=1 SV=1	28	28	206	27	152.28	567.03	28	108.1	3.06011e+07	2.52673e+07	2.61624e+07	2.38214e+07	3.30282e+07	3.79524e+07	1.62376e+07	2.30287e+07	4.04865e+07	4.28668e+07	4.39805e+07	26	27	25	24	25	26	26	22	26	26	26	26	27	25	24	25	26	26	22	26	26	26
Q91VX2	68926	Ubap2	FALSE	Ubiquitin-associated protein 2 OS=Mus musculus OX=10090 GN=Ubap2 PE=1 SV=1	30	22	206	22	118.932	551.57	22	117.9	1.33969e+07	8.42417e+06	9.82738e+06	8.73476e+06	1.6939e+07	8.34605e+06	1.54427e+07	1.05606e+07	3.09607e+07	1.35428e+07	2.17482e+07	20	16	18	16	20	18	19	18	21	17	20	20	16	18	16	20	18	19	18	21	17	20
P60710	11461	Actb	FALSE	Actin, cytoplasmic 1 OS=Mus musculus OX=10090 GN=Actb PE=1 SV=1	61	16	206	6	99.067	544.82	16	41.7	6.87228e+07	8.07157e+07	9.08589e+07	9.65108e+07	1.03602e+08	1.18407e+08	7.52825e+07	9.1897e+07	1.8477e+08	1.49132e+08	1.73677e+08	14	16	15	15	14	15	16	15	15	15	15	14	16	15	15	14	15	16	15	15	15	15
Q60668	11991	Hnrnpd	FALSE	Heterogeneous nuclear ribonucleoprotein D0 OS=Mus musculus OX=10090 GN=Hnrnpd PE=1 SV=2	40	16	205	14	97.495	516.41	16	38.3	3.83837e+07	5.47646e+07	4.84945e+07	4.72035e+07	5.26815e+07	3.23595e+07	2.25623e+07	4.1475e+07	7.27613e+07	4.95837e+07	6.26992e+07	15	15	15	15	14	14	15	15	16	15	15	15	15	15	15	14	14	15	15	16	15	15
Q9ERB0	67474	Snap29	TRUE	Synaptosomal-associated protein 29 OS=Mus musculus OX=10090 GN=Snap29 PE=1 SV=1	76	24	205	24	116.276	568.58	24	29.6	4.66996e+07	3.94316e+07	3.85847e+07	4.57993e+07	5.84216e+07	3.64196e+07	4.7231e+07	4.70774e+07	8.90539e+07	5.94151e+07	9.04846e+07	21	21	22	22	19	19	22	20	24	23	22	21	21	22	22	19	19	22	20	24	23	22
Q9D281	68303	Fam114a1	FALSE	Protein Noxp20 OS=Mus musculus OX=10090 GN=Fam114a1 PE=1 SV=1	67	26	205	26	128.913	627.97	26	61	9.72576e+06	1.93762e+07	1.69439e+07	1.85736e+07	1.34975e+07	2.89435e+07	1.85421e+07	2.01872e+07	3.95594e+07	2.46347e+07	2.58395e+07	18	21	22	19	19	21	21	21	22	21	21	18	21	22	19	19	21	21	21	22	21	21
Q99NB8	94232	Ubqln4	FALSE	Ubiquilin-4 OS=Mus musculus OX=10090 GN=Ubqln4 PE=1 SV=1	37	13	203	11	77.463	565.92	13	63.5	3.07897e+06	5356616	5.40408e+06	4.27035e+06	4.151e+06	4.35173e+06	5.1669e+06	4.87383e+06	1.17451e+07	5.35075e+06	8.46777e+06	9	12	11	12	12	10	13	13	13	11	12	9	12	11	12	12	10	13	13	13	11	12
P62075	30055	Timm13	TRUE	Mitochondrial import inner membrane translocase subunit Tim13 OS=Mus musculus OX=10090 GN=Timm13 PE=1 SV=1	79	8	202	8	53.794	602.16	8	10.5	9.37282e+07	1.0754e+08	1.13504e+08	1.38528e+08	1.50569e+08	2.42025e+08	2.92291e+08	3.60304e+08	6.15261e+08	5.08065e+08	3.58452e+08	7	7	7	7	7	7	7	7	7	8	7	7	7	7	7	7	7	7	7	7	8	7
P29699	11625	Ahsg	FALSE	Alpha-2-HS-glycoprotein OS=Mus musculus OX=10090 GN=Ahsg PE=1 SV=1	60	13	202	13	101.908	717.27	13	37.3	1.0067e+08	1.34767e+08	1.0676e+08	2.69161e+08	9.77751e+07	2.5474e+08	1.38026e+08	1.99867e+08	2.16451e+08	1.6081e+08	1.66997e+08	11	10	10	10	10	12	10	11	13	10	10	11	10	10	10	10	12	10	11	13	10	10
Q8K2Q9	71653	Shtn1	FALSE	Shootin-1 OS=Mus musculus OX=10090 GN=Shtn1 PE=1 SV=1	48	27	201	27	110.381	592.06	27	71.3	1.99556e+07	1.53253e+07	1.29459e+07	1.53787e+07	1.98537e+07	17919261	2.22941e+07	2.00326e+07	2.72146e+07	2.53171e+07	2.94841e+07	24	24	24	25	23	23	25	25	23	25	25	24	24	24	25	23	23	25	25	23	25	25
Q922R8	71853	Pdia6	FALSE	Protein disulfide-isomerase A6 OS=Mus musculus OX=10090 GN=Pdia6 PE=1 SV=3	53	20	199	20	101.618	636.99	20	48.1	2.99832e+07	2.36904e+08	2.28628e+08	1.515e+08	4.48268e+07	2.09658e+08	5.38641e+07	1.10467e+08	1.15532e+08	1.38903e+08	1.41367e+08	16	19	18	20	16	18	17	17	18	17	19	16	19	18	20	16	18	17	17	18	17	19
Q9Z1P6	66416	Ndufa7	TRUE	NADH dehydrogenase [ubiquinone] 1 alpha subcomplex subunit 7 OS=Mus musculus OX=10090 GN=Ndufa7 PE=1 SV=3	77	13	199	13	69.98	534.28	13	12.6	4.48154e+07	5.58894e+07	4.89891e+07	3.87377e+07	6.20725e+07	8.72626e+07	9.62555e+07	1.5544e+08	1.46368e+08	1.05916e+08	1.01517e+08	10	10	9	10	9	11	12	13	12	12	12	10	10	9	10	9	11	12	13	12	12	12
Q9QYE6	27277	Golga5	FALSE	Golgin subfamily A member 5 OS=Mus musculus OX=10090 GN=Golga5 PE=1 SV=2	51	31	199	31	135.855	578.14	31	82.3	1.38724e+07	1.40528e+07	1.3886e+07	1.26501e+07	1.37533e+07	1.77212e+07	1.42194e+07	1.62025e+07	2.50417e+07	1.8511e+07	1.81954e+07	29	26	30	24	25	26	28	26	29	28	27	29	26	30	24	25	26	28	26	29	28	27
O70318	13822	Epb41l2	FALSE	Band 4.1-like protein 2 OS=Mus musculus OX=10090 GN=Epb41l2 PE=1 SV=2	44	31	198	30	130.413	564.48	31	109.9	2.4373e+07	1.6468e+07	1.38501e+07	1.98184e+07	2.14898e+07	1.61194e+07	1.59656e+07	1.66619e+07	3.80434e+07	1.83273e+07	2.78079e+07	28	26	24	29	28	23	24	24	25	25	25	28	26	24	29	28	23	24	24	25	25	25
Q8BKI2	213988	Tnrc6b	FALSE	Trinucleotide repeat-containing gene 6B protein OS=Mus musculus OX=10090 GN=Tnrc6b PE=1 SV=2	29	36	198	36	185.112	538.35	36	191.8	1.43445e+07	8.58002e+06	1.08463e+07	1.18907e+07	1.70451e+07	5.32682e+06	7.67809e+06	8.0058e+06	1.5303e+07	7.51257e+06	1.71605e+07	31	28	30	31	33	19	27	27	27	21	29	31	28	30	31	33	19	27	27	27	21	29
O70251	55949	Eef1b2	FALSE	Elongation factor 1-beta OS=Mus musculus OX=10090 GN=Eef1b PE=1 SV=5	87	18	198	18	102.951	585.93	18	24.7	2.15247e+08	2.11564e+08	2.45287e+08	2.62552e+08	2.56463e+08	1.98733e+08	1.72197e+08	1.98469e+08	3.51435e+08	2.45685e+08	3.39749e+08	15	12	11	14	11	11	13	13	13	12	13	15	12	11	14	11	11	13	13	13	12	13
Q922Y1	225896	Ubxn1	FALSE	UBX domain-containing protein 1 OS=Mus musculus OX=10090 GN=Ubxn1 PE=1 SV=1	77	18	197	18	98.035	612.73	18	33.6	4.02985e+07	4.36305e+07	4.02033e+07	3.82069e+07	3.74804e+07	3.62835e+07	3.21937e+07	3.06429e+07	4.54314e+07	4.60615e+07	4.91696e+07	18	18	18	18	18	18	18	16	17	18	18	18	18	18	18	18	18	18	16	17	18	18
P57776	66656	Eef1d	FALSE	Elongation factor 1-delta OS=Mus musculus OX=10090 GN=Eef1d PE=1 SV=3	68	16	197	16	77.99	563.74	16	31.3	1.11168e+08	1.5429e+08	1.64592e+08	1.56625e+08	1.28488e+08	1.36475e+08	1.04975e+08	1.12928e+08	2.14391e+08	1.58683e+08	2.02665e+08	14	15	15	15	15	14	13	14	13	12	15	14	15	15	15	15	14	13	14	13	12	15
P46938	22601	Yap1	FALSE	Transcriptional coactivator YAP1 OS=Mus musculus OX=10090 GN=Yap1 PE=1 SV=2	69	18	196	17	123.909	629.81	18	52.4	4.37152e+07	3.48588e+07	3.78384e+07	3.73716e+07	5.39863e+07	3.44175e+07	3.99275e+07	4.48499e+07	8.03862e+07	5.02852e+07	6.95634e+07	18	17	17	17	17	17	17	18	17	15	17	18	17	17	17	17	17	17	18	17	15	17
Q9WTP6	11637	Ak2	TRUE	Adenylate kinase 2, mitochondrial OS=Mus musculus OX=10090 GN=Ak2 PE=1 SV=5	76	17	196	17	103.035	582.16	17	26.5	4.9403e+06	3.06509e+07	3.45698e+07	1.53677e+07	7.15436e+06	9.83818e+07	2.22225e+07	6.99777e+07	6.7597e+07	1.74499e+08	4.09183e+07	10	14	14	14	10	16	13	15	16	17	14	10	14	14	14	10	16	13	15	16	17	14
E9Q5C9	70769	Nolc1	FALSE	Nucleolar and coiled-body phosphoprotein 1 OS=Mus musculus OX=10090 GN=Nolc1 PE=1 SV=1	27	25	195	25	94.617	512.29	25	73.7	2.69882e+07	1.87522e+07	1.87051e+07	2.06974e+07	4.20185e+07	2.6668e+07	2.34286e+07	2.89157e+07	5.6019e+07	4.44267e+07	3.21336e+07	23	19	22	20	21	20	23	24	22	25	23	23	19	22	20	21	20	23	24	22	25	23
E9Q394	75547	Akap13	FALSE	A-kinase anchor protein 13 OS=Mus musculus OX=10090 GN=Akap13 PE=1 SV=1	19	31	194	31	140.712	571.04	31	303.8	2.22083e+07	1.68112e+07	1.42683e+07	1.72087e+07	2.36596e+07	1.09724e+07	1.20439e+07	1.23498e+07	1.45938e+07	1.19086e+07	2.69034e+07	28	26	26	28	25	23	27	26	24	23	28	28	26	26	28	25	23	27	26	24	23	28
O08539	30948	Bin1	FALSE	Myc box-dependent-interacting protein 1 OS=Mus musculus OX=10090 GN=Bin1 PE=1 SV=1	48	22	194	21	111.871	531.2	22	64.4	2.18393e+07	1.84583e+07	1.78187e+07	2.01884e+07	2.67861e+07	3.4783e+07	2.99817e+07	2.68749e+07	4.4314e+07	2.60861e+07	3.8698e+07	19	19	19	19	19	21	19	18	18	19	20	19	19	19	19	19	21	19	18	18	19	20
Q99KN9	216705	Clint1	FALSE	Clathrin interactor 1 OS=Mus musculus OX=10090 GN=Clint1 PE=1 SV=2	36	23	193	23	131.738	527.75	23	68.5	5.52472e+07	6.69489e+07	6.71998e+07	5.97449e+07	81778573	6.02619e+07	5.4017e+07	6.38794e+07	1.06299e+08	6.76843e+07	9.12004e+07	21	22	22	22	22	21	22	22	22	22	22	21	22	22	22	22	21	22	22	22	22	22
P43274	50709	H1f4	FALSE	Histone H1.4 OS=Mus musculus OX=10090 GN=H1-4 PE=1 SV=2	43	13	192	3	57.093	503.21	13	22	3.03731e+07	1.20809e+08	8.07124e+07	9.48528e+07	5.83311e+07	9.16751e+07	3.16333e+07	7.23224e+07	9.10129e+07	8.80314e+07	6.91904e+07	10	13	12	12	12	12	13	13	13	13	11	10	13	12	12	12	12	13	13	13	13	11
P54071	269951	Idh2	TRUE	Isocitrate dehydrogenase [NADP], mitochondrial OS=Mus musculus OX=10090 GN=Idh2 PE=1 SV=3	53	26	192	25	121.945	468.96	26	50.9	1.10094e+07	3.63736e+07	3.91199e+07	3.83001e+07	1.55371e+07	1.43143e+08	2.23655e+07	5.53175e+07	9.55558e+07	1.91915e+08	5.67324e+07	9	23	24	21	11	26	20	22	25	26	23	9	23	24	21	11	26	20	22	25	26	23
Q06185	11958	Atp5k	TRUE	ATP synthase subunit e, mitochondrial OS=Mus musculus OX=10090 GN=Atp5me PE=1 SV=2	72	7	192	7	40.46	502.07	7	8.2	6.13649e+07	5.80135e+07	6.82488e+07	5.11502e+07	8.75853e+07	1.53687e+08	1.89919e+08	2.13415e+08	1.85632e+08	2.25073e+08	1.53791e+08	7	5	6	5	6	6	7	6	7	7	7	7	5	6	5	6	6	7	6	7	7	7
Q61207	19156	Psap	FALSE	Prosaposin OS=Mus musculus OX=10090 GN=Psap PE=1 SV=2	40	18	192	18	103.295	538.38	18	61.4	1.1403e+08	1.05451e+08	9.67693e+07	3.65579e+08	2.63528e+08	1.96706e+08	1.06414e+08	1.56249e+08	1.32003e+08	9.65152e+07	1.55062e+08	15	16	16	17	16	16	16	16	16	15	16	15	16	16	17	16	16	16	16	16	15	16
Q8VC31	243846	Ccdc9	FALSE	Coiled-coil domain-containing protein 9 OS=Mus musculus OX=10090 GN=Ccdc9 PE=1 SV=1	34	22	191	22	94.541	476.25	22	61.4	2.38961e+07	1.87116e+07	1.64885e+07	2.04235e+07	2.63466e+07	1.79925e+07	2.33661e+07	2.33955e+07	3.68557e+07	2.49268e+07	3.08342e+07	21	20	21	22	21	20	21	22	21	21	21	21	20	21	22	21	20	21	22	21	21	21
P57780	60595	Actn4	FALSE	Alpha-actinin-4 OS=Mus musculus OX=10090 GN=Actn4 PE=1 SV=1	50	34	191	26	152.229	560	34	104.9	6.72065e+06	2.56809e+07	2.75267e+07	1.88905e+07	9.75132e+06	4.96169e+07	1.35085e+07	2.33032e+07	3.04858e+07	6.3757e+07	2.588e+07	18	32	31	27	15	33	22	27	25	33	25	18	32	31	27	15	33	22	27	25	33	25
P17751	21991	Tpi1	FALSE	Triosephosphate isomerase OS=Mus musculus OX=10090 GN=Tpi1 PE=1 SV=5	73	15	190	15	79.102	539.39	15	26.7	2.91955e+07	1.2981e+08	1.30803e+08	8.29775e+07	4.67699e+07	1.79394e+08	4.76095e+07	1.06893e+08	9.86813e+07	1.96457e+08	8.99088e+07	14	15	15	15	14	15	15	14	15	15	15	14	15	15	15	14	15	15	14	15	15	15
Q8K1Z0	67914	Coq9	TRUE	Ubiquinone biosynthesis protein COQ9, mitochondrial OS=Mus musculus OX=10090 GN=Coq9 PE=1 SV=1	48	12	189	12	96.24	534.33	12	35.1	7.81439e+06	5.90858e+07	7.20026e+07	4.14009e+07	1.21706e+07	1.07534e+08	4.83789e+07	9.33459e+07	1.53686e+08	1.78889e+08	7.97219e+07	9	11	12	11	8	11	11	12	11	12	12	9	11	12	11	8	11	11	12	11	12	12
Q8VBW8	192653	Ttc36	FALSE	Tetratricopeptide repeat protein 36 OS=Mus musculus OX=10090 GN=Ttc36 PE=1 SV=1	49	10	188	10	61.137	514.57	10	20.1	1.23891e+08	2.76929e+08	2.91792e+08	2.32652e+08	2.0392e+08	7.78755e+07	7.09533e+07	1.41458e+08	1.72105e+08	8.63205e+07	2.4998e+08	10	10	10	10	10	10	10	10	10	10	10	10	10	10	10	10	10	10	10	10	10	10
Q9D5V6	67043	Syap1	FALSE	Synapse-associated protein 1 OS=Mus musculus OX=10090 GN=Syap1 PE=1 SV=1	86	29	188	29	126.918	591.07	29	41.3	1.07163e+07	2.1366e+07	2.51854e+07	1.98043e+07	1.47313e+07	3.19259e+07	1.75523e+07	2.30569e+07	3.56798e+07	3.63493e+07	3.39854e+07	20	23	25	26	21	22	26	24	27	25	26	20	23	25	26	21	22	26	24	27	25	26
P63101	22631	Ywhaz	FALSE	14-3-3 protein zeta/delta OS=Mus musculus OX=10090 GN=Ywhaz PE=1 SV=1	80	21	188	15	94.229	534.76	21	27.8	1.14967e+07	4.20436e+07	5.6955e+07	3.28433e+07	1.86727e+07	1.3561e+08	1.99565e+07	3.7352e+07	5.32703e+07	1.12183e+08	3.84903e+07	15	19	21	19	14	21	20	20	20	21	19	15	19	21	19	14	21	20	20	20	21	19
P09411	18655	Pgk1	FALSE	Phosphoglycerate kinase 1 OS=Mus musculus OX=10090 GN=Pgk1 PE=1 SV=4	57	22	187	22	113.866	519.55	22	44.5	1.00177e+07	6.49853e+07	7.06137e+07	3.0683e+07	1.62527e+07	8.18465e+07	1.27723e+07	3.19212e+07	3.06042e+07	9.82689e+07	3.31316e+07	12	21	21	21	14	21	16	20	20	22	21	12	21	21	21	14	21	16	20	20	22	21
Q61074	14208	Ppm1g	FALSE	Protein phosphatase 1G OS=Mus musculus OX=10090 GN=Ppm1g PE=1 SV=3	46	20	187	20	94.867	519.22	20	58.7	5.55149e+07	5.3928e+07	6.50917e+07	1.31988e+08	8.05331e+07	6.73968e+07	7.05547e+07	7.07729e+07	1.51547e+08	8.13141e+07	1.30177e+08	18	20	20	17	17	20	20	19	20	20	20	18	20	20	17	17	20	20	19	20	20	20
Q9CQR2	66481	Rps21	FALSE	40S ribosomal protein S21 OS=Mus musculus OX=10090 GN=Rps21 PE=1 SV=1	65	6	186	6	51.164	507.12	6	9.1	1.85309e+08	1.49306e+08	1.46412e+08	1.84028e+08	2.43545e+08	1.07127e+08	1.40629e+08	1.41769e+08	2.453e+08	1.40953e+08	2.08246e+08	6	6	6	5	6	5	6	6	6	6	6	6	6	6	5	6	5	6	6	6	6	6
P97792	13052	Cxadr	FALSE	Coxsackievirus and adenovirus receptor homolog OS=Mus musculus OX=10090 GN=Cxadr PE=1 SV=1	63	19	185	19	101.361	458.83	19	39.9	2.75226e+07	1.74317e+07	2.26982e+07	2.01901e+07	4.15267e+07	4.3993e+07	3.30726e+07	3.83817e+07	5.2549e+07	3.73132e+07	3.92922e+07	18	17	17	18	18	17	18	17	19	18	17	18	17	17	18	18	17	18	17	19	18	17
P56212	59046	Arpp19	FALSE	cAMP-regulated phosphoprotein 19 OS=Mus musculus OX=10090 GN=Arpp19 PE=1 SV=2	83	13	183	12	84.167	515.31	13	12.3	2.44483e+07	1.85373e+07	1.60618e+07	2.64198e+07	4.54099e+07	3.51181e+07	5.95788e+07	4.61381e+07	1.40412e+08	8.07609e+07	6.08859e+07	11	12	12	12	12	12	12	12	13	12	12	11	12	12	12	12	12	12	12	13	12	12
Q7TQH0	233871	Atxn2l	FALSE	Ataxin-2-like protein OS=Mus musculus OX=10090 GN=Atxn2l PE=1 SV=1	32	27	182	26	112.112	465.02	27	110.6	3.53159e+07	2.40375e+07	2.36266e+07	2.16788e+07	3.54817e+07	1.92554e+07	2.47865e+07	2.63917e+07	3.52907e+07	2.82888e+07	4.10644e+07	22	22	25	24	20	24	23	24	23	24	22	22	22	25	24	20	24	23	24	23	24	22
P14602	15507	Hspb1	FALSE	Heat shock protein beta-1 OS=Mus musculus OX=10090 GN=Hspb1 PE=1 SV=3	88	19	182	19	85.273	584.28	19	23	1.29414e+07	1.82018e+07	1.76998e+07	1.66299e+07	1.34301e+07	1.62629e+08	1.66066e+08	1.01467e+08	3.33815e+08	4.16483e+08	2.63232e+08	10	12	14	12	11	17	19	17	19	19	18	10	12	14	12	11	17	19	17	19	19	18
B5X0G2	100039206	Mup17	FALSE	Major urinary protein 17 OS=Mus musculus OX=10090 GN=Mup17 PE=2 SV=2	77	14	181	4	100.35	536.94	14	20.6	7.15298e+07	4.03217e+07	4.66353e+07	6.8451e+07	6.4526e+07	1.69306e+06	3.96979e+06	747217			1.80061e+06	14	13	13	13	14	8	12	10	2	3	10	14	13	13	13	14	8	12	10	2	3	10
Q8R4U7	269593	Luzp1	FALSE	Leucine zipper protein 1 OS=Mus musculus OX=10090 GN=Luzp1 PE=1 SV=2	36	31	181	31	122.977	530.98	31	119.2	1.28233e+07	9.2439e+06	1.00821e+07	9.43028e+06	1.56371e+07	7.44467e+06	1.32889e+07	1.24193e+07	1.61168e+07	1.18429e+07	1.74852e+07	28	26	25	22	28	23	26	26	26	26	24	28	26	25	22	28	23	26	26	26	26	24
P26443	14661	Glud1	TRUE	Glutamate dehydrogenase 1, mitochondrial OS=Mus musculus OX=10090 GN=Glud1 PE=1 SV=1	38	20	179	20	81.639	454.57	20	61.3	3.23856e+07	3.31446e+07	4.0492e+07	3.12152e+07	4.26264e+07	5.86215e+07	8.03505e+07	1.01736e+08	1.27757e+08	1.2635e+08	8.37957e+07	15	18	18	15	14	16	14	16	17	19	16	15	18	18	15	14	16	14	16	17	19	16
O70305	20239	Atxn2	FALSE	Ataxin-2 OS=Mus musculus OX=10090 GN=Atxn2 PE=1 SV=1	22	23	179	22	101.376	462.13	23	136.4	2.78067e+07	1.98366e+07	2.07975e+07	3.24351e+07	3.82122e+07	27951254	1.98947e+07	2.08486e+07	3.35675e+07	2.19424e+07	4.49651e+07	21	21	21	21	20	20	21	19	22	22	22	21	21	21	21	20	20	21	19	22	22	22
P01899	14964	H2-D1	FALSE	H-2 class I histocompatibility antigen, D-B alpha chain OS=Mus musculus OX=10090 GN=H2-D1 PE=1 SV=2	44	16	179	13	89.424	453.42	16	40.8	1.0835e+07	9.02495e+07	1.11183e+08	6.81274e+07	1.62055e+07	9.16646e+07	2.49839e+07	5.98914e+07	8.00637e+07	7.37291e+07	1.20302e+08	12	14	15	16	12	15	15	16	16	15	16	12	14	15	16	12	15	15	16	16	15	16
Q91ZX7	16971	Lrp1	FALSE	Prolow-density lipoprotein receptor-related protein 1 OS=Mus musculus OX=10090 GN=Lrp1 PE=1 SV=1	11	37	179	37	135.242	468.47	37	504.4	5.04271e+06	1.28307e+07	1.97802e+07	1.7506e+07	7.46304e+06	1.9961e+07	7.20905e+06	1.03882e+07	1.28314e+07	1.981e+07	1.96408e+07	16	24	31	27	21	29	24	26	27	29	28	16	24	31	27	21	29	24	26	27	29	28
Q05D44	226982	Eif5b	FALSE	Eukaryotic translation initiation factor 5B OS=Mus musculus OX=10090 GN=Eif5b PE=1 SV=2	17	32	178	31	150.888	565.4	32	137.5	3.57603e+07	2.55396e+07	2.11735e+07	2.95665e+07	4.41768e+07	2.0975e+07	2.58826e+07	2.64001e+07	3.6863e+07	3.2808e+07	4.17516e+07	30	25	26	29	24	23	27	26	27	27	27	30	25	26	29	24	23	27	26	27	27	27
P63028	22070	Tpt1	FALSE	Translationally-controlled tumor protein OS=Mus musculus OX=10090 GN=Tpt1 PE=1 SV=1	89	12	177	12	72.61	522.73	12	19.5	3.17766e+07	8.80253e+07	8.72146e+07	6.48709e+07	4.4729e+07	1.4275e+08	6.35535e+07	8.62665e+07	1.90684e+08	1.39081e+08	1.16337e+08	9	11	11	11	9	11	11	11	12	11	11	9	11	11	11	9	11	11	11	12	11	11
Q9DB20	28080	Atp5o	TRUE	ATP synthase subunit O, mitochondrial OS=Mus musculus OX=10090 GN=Atp5po PE=1 SV=1	72	14	177	14	72.223	534.06	14	23.3	1.17219e+07	6.05998e+07	6.23829e+07	4.94608e+07	2.4661e+07	1.46861e+08	5.51799e+07	1.47555e+08	1.47834e+08	2.38985e+08	7.99971e+07	11	14	13	13	11	14	13	14	13	14	13	11	14	13	13	11	14	13	14	13	14	13
O35114	12492	Scarb2	FALSE	Lysosome membrane protein 2 OS=Mus musculus OX=10090 GN=Scarb2 PE=1 SV=3	33	13	177	13	82.437	498.53	13	54	3.68363e+07	4.9735e+07	6.34778e+07	5.91938e+07	5.52608e+07	4.87728e+07	4.13889e+07	4.90181e+07	8.31964e+07	5.86081e+07	6.0958e+07	13	13	13	13	13	13	13	13	12	13	13	13	13	13	13	13	13	13	13	12	13	13
P01901	14972	H2-K1	FALSE	H-2 class I histocompatibility antigen, K-B alpha chain OS=Mus musculus OX=10090 GN=H2-K1 PE=1 SV=1	51	16	174	9	81.862	461.72	16	41.3	3.62777e+06	3.0559e+07	3.67128e+07	2.75708e+07	4.73144e+06	25698904	5.59876e+06	1.45852e+07	1.93992e+07	1.55247e+07	3.32494e+07	9	15	15	14	12	14	14	15	16	15	16	9	15	15	14	12	14	14	15	16	15	16
Q61545	14030	Ewsr1	FALSE	RNA-binding protein EWS OS=Mus musculus OX=10090 GN=Ewsr1 PE=1 SV=2	19	10	174	10	75.363	544.36	10	68.4	5.07636e+07	4.45265e+07	4.65009e+07	4.23163e+07	5.52274e+07	2.38626e+07	4.205e+07	5.09269e+07	9.09185e+07	4.52273e+07	7.09335e+07	10	10	10	10	10	10	10	10	10	10	10	10	10	10	10	10	10	10	10	10	10	10
Q00898	20704	Serpina1e	FALSE	Alpha-1-antitrypsin 1-5 OS=Mus musculus OX=10090 GN=Serpina1e PE=1 SV=1	40	15	174	7	94.353	580.75	15	45.9	1.08794e+08	2.18636e+07	2.15479e+07	2.15847e+07	8.20075e+07	1.88556e+07	2.24478e+07	2.07159e+07	1.44061e+07	1.26985e+07	1.82635e+07	15	13	13	13	15	13	13	12	12	9	11	15	13	13	13	15	13	13	12	12	9	11
Q8BFU2	319162	H2aw	FALSE	Histone H2A type 3 OS=Mus musculus OX=10090 GN=H2aw PE=1 SV=3	64	9	173	2	38.929	428.09	9	14.1	565159	1064116	1.54877e+06	2.37822e+06	1.21389e+06	2.86483e+06	939045	3.12309e+06	1.92028e+07	5.1616e+06	6.01234e+06	8	9	9	9	8	8	9	9	9	9	9	8	9	9	9	8	8	9	9	9	9	9
O08784	21453	Tcof1	FALSE	Treacle protein OS=Mus musculus OX=10090 GN=Tcof1 PE=1 SV=1	31	31	173	31	121.943	523.85	31	134.9	1.80259e+07	1.50668e+07	1.39581e+07	1.49568e+07	2.30526e+07	1.25426e+07	1.53897e+07	1.71253e+07	3.3621e+07	2.38341e+07	2.44758e+07	27	27	23	24	29	24	26	25	27	25	28	27	27	23	24	29	24	26	25	27	25	28
P62852	75617	Rps25	FALSE	40S ribosomal protein S25 OS=Mus musculus OX=10090 GN=Rps25 PE=1 SV=1	47	10	173	10	31.78	467.67	10	13.7	1.31916e+08	2.15113e+08	1.90682e+08	1.89789e+08	2.52945e+08	1.54503e+08	1.4087e+08	2.30815e+08	3.15e+08	1.8454e+08	2.39671e+08	10	10	10	10	10	9	10	10	10	10	10	10	10	10	10	10	9	10	10	10	10	10
Q9CSN1	66354	Snw1	FALSE	SNW domain-containing protein 1 OS=Mus musculus OX=10090 GN=Snw1 PE=1 SV=3	55	25	173	25	119.141	468.85	25	61.4	1.84781e+07	2.37628e+07	2.1575e+07	1.87372e+07	2.51852e+07	1.51633e+07	1.49048e+07	2.08465e+07	3.41216e+07	2.35312e+07	2.67055e+07	24	23	23	24	24	23	25	24	24	25	24	24	23	23	24	24	23	25	24	24	25	24
P52503	407785	Ndufs6	TRUE	NADH dehydrogenase [ubiquinone] iron-sulfur protein 6, mitochondrial OS=Mus musculus OX=10090 GN=Ndufs6 PE=1 SV=2	66	9	172	9	63.379	510.21	9	13	1.70391e+08	1.25521e+08	1.1209e+08	1.39178e+08	2.08468e+08	2.24661e+08	3.37233e+08	3.83788e+08	4.27228e+08	2.88715e+08	3.38672e+08	9	9	9	9	9	9	9	9	9	9	9	9	9	9	9	9	9	9	9	9	9	9
P68134	11459	Acta1	FALSE	Actin, alpha skeletal muscle OS=Mus musculus OX=10090 GN=Acta1 PE=1 SV=1	41	12	172	3	73.553	431.01	12	42	1.15689e+07	1.24901e+07	1.3483e+07	1.85505e+07	1.66415e+07	1.71315e+07	1.25712e+07	1.42248e+07	2.95802e+07	29943360	3.22116e+07	9	10	10	10	9	11	10	10	10	10	10	9	10	10	10	9	11	10	10	10	10	10
P08003	12304	Pdia4	FALSE	Protein disulfide-isomerase A4 OS=Mus musculus OX=10090 GN=Pdia4 PE=1 SV=3	35	25	172	25	101.473	438.14	25	71.9	2.58894e+07	3.20424e+07	3.32969e+07	3.38603e+07	3.09132e+07	1.80094e+07	1.14075e+07	1.29833e+07	2.56169e+07	1.9123e+07	3.38415e+07	24	24	24	24	24	22	24	23	25	24	24	24	24	24	24	24	22	24	23	25	24	24
Q925B0	114774	Pawr	FALSE	PRKC apoptosis WT1 regulator protein OS=Mus musculus OX=10090 GN=Pawr PE=1 SV=2	75	20	171	20	127.167	564.51	20	35.9	2.0671e+07	1.36906e+07	1.29998e+07	1.99365e+07	2.65241e+07	2.1872e+07	2.70231e+07	2.19352e+07	7.75233e+07	3.20386e+07	3.66416e+07	18	19	15	19	17	17	18	18	19	19	18	18	19	15	19	17	17	18	18	19	19	18
P70194	51811	Clec4f	FALSE	C-type lectin domain family 4 member F OS=Mus musculus OX=10090 GN=Clec4f PE=1 SV=1	47	19	171	19	88.808	442.8	19	61.2	2.75183e+07	4.15831e+07	4.81111e+07	4.6335e+07	2.59386e+07	2.54594e+07	2.426e+07	2.37895e+07	5.19269e+07	4.7145e+07	7.35554e+07	16	16	17	17	16	14	15	16	17	16	17	16	16	17	17	16	14	15	16	17	16	17
P51885	17022	Lum	FALSE	Lumican OS=Mus musculus OX=10090 GN=Lum PE=1 SV=2	43	15	171	15	69.628	469.96	15	38.2	4.83161e+07	6.38769e+07	6.85381e+07	1.99431e+08	7.43813e+07	3.0179e+08	6.23991e+07	7.44519e+07	2.25455e+08	7.85886e+07	2.03051e+08	14	13	14	14	13	15	14	13	15	13	15	14	13	14	14	13	15	14	13	15	13	15
Q64522	621893	H2ac21	FALSE	Histone H2A type 2-B OS=Mus musculus OX=10090 GN=H2ac21 PE=1 SV=3	63	7	170	1	42.005	473.61	7	14	280542	595483	523898	443966	665660	939534	223613	625208	783004	1.3047e+06	543825	6	6	6	6	6	6	6	6	7	6	6	6	6	6	6	6	6	6	6	7	6	6
O70570	18703	Pigr	FALSE	Polymeric immunoglobulin receptor OS=Mus musculus OX=10090 GN=Pigr PE=1 SV=1	37	19	169	19	77.94	469.15	19	84.9	2.39504e+07	3.57215e+07	4.65383e+07	3.24195e+07	3.27205e+07	1.04785e+07	4.25678e+06	6.25731e+06	8.87803e+06	1.01878e+07	3.75345e+07	16	17	18	18	16	12	12	13	13	14	16	16	17	18	18	16	12	12	13	13	14	16
Q99P72	68585	Rtn4	FALSE	Reticulon-4 OS=Mus musculus OX=10090 GN=Rtn4 PE=1 SV=2	44	29	169	29	137.992	529.17	29	126.5	4.01656e+06	1.37415e+07	1.15292e+07	1.04594e+07	5.98012e+06	2.90927e+07	1.67858e+07	1.53701e+07	7.47858e+07	5.95478e+07	3.35203e+07	16	19	17	18	17	22	21	20	28	27	24	16	19	17	18	17	22	21	20	28	27	24
Q4PZA2	230857	Ece1	FALSE	Endothelin-converting enzyme 1 OS=Mus musculus OX=10090 GN=Ece1 PE=1 SV=1	41	23	169	23	97.437	437.68	23	87	4.60139e+06	1.63003e+07	2.01287e+07	2.00805e+07	1.04314e+07	1.62767e+07	9.27459e+06	1.41147e+07	2.30754e+07	1.9915e+07	2.27403e+07	16	20	21	20	20	21	20	21	22	20	22	16	20	21	20	20	21	20	21	22	20	22
P15532	18102	Nme1	FALSE	Nucleoside diphosphate kinase A OS=Mus musculus OX=10090 GN=Nme1 PE=1 SV=1	80	13	169	8	71.494	489.51	13	17.2	1.08525e+07	7.12842e+07	7.51405e+07	5.52239e+07	1.89852e+07	1.41456e+08	3.90137e+07	9.13893e+07	8.27629e+07	1.59703e+08	6.20063e+07	13	13	12	13	11	12	13	12	13	13	13	13	13	12	13	11	12	13	12	13	13	13
Q9QX47	20658	Son	FALSE	Protein SON OS=Mus musculus OX=10090 GN=Son PE=1 SV=2	20	31	169	31	129.272	495.93	31	265.5	2.37186e+07	1.15404e+07	1.35243e+07	1.61263e+07	2.6415e+07	1.19025e+07	8.85385e+06	1.01518e+07	1.86059e+07	1.32234e+07	2.46009e+07	30	24	24	26	30	21	19	19	25	22	27	30	24	24	26	30	21	19	19	25	22	27
Q61176	11846	Arg1	FALSE	Arginase-1 OS=Mus musculus OX=10090 GN=Arg1 PE=1 SV=1	62	16	167	16	66.462	497.42	16	34.8	6.65043e+07	7.84964e+07	8.37143e+07	9.58349e+07	1.33522e+08	5.38219e+07	6.02092e+07	9.26252e+07	1.00977e+08	8.0698e+07	1.1071e+08	16	16	16	15	15	14	16	15	15	15	15	16	16	16	15	15	14	16	15	15	15	15
Q8C7G5	66113	Apoa5	FALSE	Apolipoprotein A-V OS=Mus musculus OX=10090 GN=Apoa5 PE=1 SV=1	60	17	167	17	83.501	511.52	17	41.2	1.83587e+07	3.01977e+07	2.57687e+07	2.25595e+07	2.87434e+07	1.67002e+07	1.79348e+07	2.35033e+07	2.54581e+07	1.32491e+07	2.51238e+07	16	17	17	16	17	15	17	17	16	15	16	16	17	17	16	17	15	17	17	16	15	16
Q99L47	70356	St13	FALSE	Hsc70-interacting protein OS=Mus musculus OX=10090 GN=St13 PE=1 SV=1	33	13	167	13	72.064	449.85	13	41.6	3.55974e+07	6.97698e+07	7.58954e+07	5.50858e+07	4.03546e+07	7.46008e+07	4.4733e+07	5.81142e+07	1.03409e+08	9.28425e+07	9.49695e+07	11	11	11	11	11	11	11	12	13	11	12	11	11	11	11	11	11	11	12	13	11	12
Q99LC5	110842	Etfa	TRUE	Electron transfer flavoprotein subunit alpha, mitochondrial OS=Mus musculus OX=10090 GN=Etfa PE=1 SV=2	65	16	166	16	84.236	559.14	16	35	1.16975e+07	3.63378e+07	3.8067e+07	2.68638e+07	1.60354e+07	8.47658e+07	2.62422e+07	6.63355e+07	6.24648e+07	1.1414e+08	4.18925e+07	13	16	16	16	13	15	13	16	15	16	14	13	16	16	16	13	15	13	16	15	16	14
Q3TIV5	69082	Zc3h15	FALSE	Zinc finger CCCH domain-containing protein 15 OS=Mus musculus OX=10090 GN=Zc3h15 PE=1 SV=2	53	21	166	21	98.05	440.01	21	48.3	2.0342e+07	2.49053e+07	2.8231e+07	2.33661e+07	3.06742e+07	1.88546e+07	1.83744e+07	1.98875e+07	3.08575e+07	1.88265e+07	2.86071e+07	20	19	20	21	20	19	21	20	21	21	20	20	19	20	21	20	19	21	20	21	21	20
Q9CR41	67693	Hypk	FALSE	Huntingtin-interacting protein K OS=Mus musculus OX=10090 GN=Hypk PE=1 SV=2	52	10	166	10	78.384	509.84	10	14.7	2.82649e+07	1.95874e+07	2.17274e+07	2.62266e+07	3.81077e+07	2.17854e+07	2.55065e+07	2.57911e+07	4.60012e+07	3.47828e+07	4.01341e+07	10	10	10	10	10	10	10	10	10	10	10	10	10	10	10	10	10	10	10	10	10	10
Q9D8Y0	27984	Efhd2	FALSE	EF-hand domain-containing protein D2 OS=Mus musculus OX=10090 GN=Efhd2 PE=1 SV=1	53	16	166	16	69.631	439.41	16	26.8	1.76241e+07	5.01344e+07	4.45839e+07	4.70405e+07	2.14604e+07	8.41196e+07	5.28663e+07	6.6971e+07	9.83927e+07	9.23325e+07	7.86805e+07	15	15	14	14	14	15	15	14	16	15	15	15	15	14	14	14	15	15	14	16	15	15
P42567	13858	Eps15	FALSE	Epidermal growth factor receptor substrate 15 OS=Mus musculus OX=10090 GN=Eps15 PE=1 SV=1	44	25	165	25	103.66	498.09	25	98.4	1.70769e+07	1.29933e+07	1.81404e+07	1.92918e+07	2.31779e+07	1.72748e+07	1.73452e+07	2.05697e+07	2.79944e+07	2.11449e+07	3.59024e+07	22	19	20	24	18	20	21	19	21	23	22	22	19	20	24	18	20	21	19	21	23	22
P40630	21780	Tfam	TRUE	Transcription factor A, mitochondrial OS=Mus musculus OX=10090 GN=Tfam PE=1 SV=2	45	15	164	15	76.558	373.6	15	28	2.00619e+07	4.04728e+07	3.98933e+07	3.75782e+07	3.74472e+07	5.57298e+07	5.12813e+07	8.6941e+07	1.42018e+08	1.02139e+08	7.62258e+07	13	14	15	15	14	14	15	15	14	15	14	13	14	15	15	14	14	15	15	14	15	14
Q91Z58	224833	AI661453	FALSE	Uncharacterized protein C6orf132 homolog OS=Mus musculus OX=10090 PE=1 SV=2	34	28	164	28	111.576	454.49	28	127.8	2.68423e+07	1.51724e+07	1.37947e+07	1.25936e+07	3.21048e+07	7.73329e+06	1.42603e+07	1.90708e+07	1.44766e+07	1.22223e+07	1.96508e+07	28	28	27	26	28	23	27	28	25	26	26	28	28	27	26	28	23	27	28	25	26	26
E9Q6J5	665775	Bod1l	FALSE	Biorientation of chromosomes in cell division protein 1-like 1 OS=Mus musculus OX=10090 GN=Bod1l PE=1 SV=1	18	37	163	37	152.778	471.76	37	327.3	4.39903e+07	2.91011e+07	3.74142e+07	1.00465e+08	6.64461e+07	1.77122e+08	4.26384e+07	4.61553e+07	8.9297e+07	3.73595e+07	8.81528e+07	31	25	25	31	31	25	32	26	33	24	29	31	25	25	31	31	25	32	26	33	24	29
Q9ERD7	22152	Tubb3	FALSE	Tubulin beta-3 chain OS=Mus musculus OX=10090 GN=Tubb3 PE=1 SV=1	38	16	163	1	81.737	455.4	16	50.4		291449	212880	213552		1.34295e+06	98232.9	230126	520689	849054	465855	8	15	13	14	8	14	12	12	15	15	15	8	15	13	14	8	14	12	12	15	15	15
Q3UTJ2	234214	Sorbs2	FALSE	Sorbin and SH3 domain-containing protein 2 OS=Mus musculus OX=10090 GN=Sorbs2 PE=1 SV=2	26	23	162	23	91.742	445.01	23	132.3	1.69129e+07	1.3584e+07	1.34112e+07	1.07844e+07	1.84801e+07	1.6809e+07	1.09109e+07	1.88484e+07	2.7388e+07	1.96224e+07	1.71195e+07	21	21	21	21	20	21	19	22	23	22	21	21	21	21	21	20	21	19	22	23	22	21
Q9CPU0	109801	Glo1	FALSE	Lactoylglutathione lyase OS=Mus musculus OX=10090 GN=Glo1 PE=1 SV=3	86	13	162	13	59.464	380.37	13	20.8	4.39745e+07	2.41497e+08	2.53241e+08	1.87816e+08	9.96602e+07	1.54347e+08	5.19037e+07	1.50215e+08	1.00024e+08	1.16101e+08	1.68193e+08	11	12	13	13	12	13	11	13	11	11	12	11	12	13	13	12	13	11	13	11	11	12
P18572	12215	Bsg	FALSE	Basigin OS=Mus musculus OX=10090 GN=Bsg PE=1 SV=2	29	12	162	12	60.838	437.77	12	42.4	1.17214e+08	1.36999e+08	1.69486e+08	1.42657e+08	1.63936e+08	1.57932e+08	1.03959e+08	1.15691e+08	2.62454e+08	1.6527e+08	2.4958e+08	11	11	11	11	11	11	12	11	12	11	12	11	11	11	11	11	11	12	11	12	11	12
Q5F2E7	68564	Nufip2	FALSE	Nuclear fragile X mental retardation-interacting protein 2 OS=Mus musculus OX=10090 GN=Nufip2 PE=1 SV=1	45	22	162	22	84.401	450.54	22	75.6	2.32281e+07	1.34723e+07	1.21407e+07	1.29018e+07	2.51812e+07	1.0099e+07	1.42845e+07	1.52102e+07	2.38972e+07	1.28658e+07	2.3568e+07	22	22	22	22	22	21	22	21	22	22	22	22	22	22	22	22	21	22	21	22	22	22
O08709	11758	Prdx6	TRUE	Peroxiredoxin-6 OS=Mus musculus OX=10090 GN=Prdx6 PE=1 SV=3	76	15	162	15	75.57	473.82	15	24.9	1.88993e+07	8.61544e+07	9.76679e+07	6.4935e+07	3.24784e+07	8.11236e+07	2.37445e+07	5.23721e+07	4.586e+07	9.06504e+07	5.03115e+07	15	15	15	15	15	15	15	15	15	15	15	15	15	15	15	15	15	15	15	15	15	15
Q9CY50	107513	Ssr1	FALSE	Translocon-associated protein subunit alpha OS=Mus musculus OX=10090 GN=Ssr1 PE=1 SV=1	31	6	162	6	37.828	386.66	6	32	1.35857e+08	1.40303e+08	1.40955e+08	1.27936e+08	1.35798e+08	1.30297e+08	1.10827e+08	1.14361e+08	1.4356e+08	1.10442e+08	1.62737e+08	6	5	6	5	5	5	5	5	5	5	5	6	5	6	5	5	5	5	5	5	5	5
O09012	19305	Pex5	FALSE	Peroxisomal targeting signal 1 receptor OS=Mus musculus OX=10090 GN=Pex5 PE=1 SV=2	59	24	162	24	132.826	487.32	24	70.7	5.57423e+06	2.14859e+07	2.20883e+07	1.35327e+07	8.72537e+06	2.49159e+07	6.01849e+06	1.61504e+07	7.63207e+06	2.95721e+07	1.68797e+07	17	23	23	22	14	22	19	23	16	24	23	17	23	23	22	14	22	19	23	16	24	23
Q8K4L3	225115	Svil	FALSE	Supervillin OS=Mus musculus OX=10090 GN=Svil PE=1 SV=1	13	21	162	21	95.266	483.15	21	243	1.56219e+07	1.34453e+07	1.30095e+07	1.04941e+07	1.51635e+07	8.65495e+06	1.14864e+07	1.42927e+07	1.26204e+07	9.31247e+06	1.92322e+07	20	21	21	19	21	18	19	20	18	18	21	20	21	21	19	21	18	19	20	18	18	21
Q9D273	77697	Mmab	TRUE	Corrinoid adenosyltransferase OS=Mus musculus OX=10090 GN=Mmab PE=1 SV=1	62	14	161	14	81.941	445.24	14	26.3	5.56203e+06	1.88656e+07	1.90233e+07	1.41553e+07	8.30365e+06	3.7534e+07	2.8951e+07	4.89777e+07	5.56803e+07	4.01594e+07	2.87704e+07	10	12	12	12	10	13	14	14	14	14	13	10	12	12	12	10	13	14	14	14	14	13
P81117	53322	Nucb2	FALSE	Nucleobindin-2 OS=Mus musculus OX=10090 GN=Nucb2 PE=1 SV=2	56	21	160	21	106.212	430.57	21	50.3	2.97228e+07	1.18516e+07	1.09669e+07	1.51503e+07	1.35739e+07	2.19376e+07	2.11426e+07	1.67995e+07	4.20227e+07	2.16323e+07	2.93112e+07	19	17	18	19	20	19	19	19	20	19	20	19	17	18	19	20	19	19	19	20	19	20
P50518	11973	Atp6v1e1	FALSE	V-type proton ATPase subunit E 1 OS=Mus musculus OX=10090 GN=Atp6v1e1 PE=1 SV=2	70	15	160	15	97.783	462.72	15	26.1	9.56325e+06	3.09341e+07	3.11224e+07	2.44673e+07	1.45043e+07	5.43206e+07	4.30667e+07	4.78025e+07	8.51741e+07	8.75329e+07	5.10983e+07	12	14	14	13	13	13	14	14	15	13	14	12	14	14	13	13	13	14	14	15	13	14
Q91W90	105245	Txndc5	FALSE	Thioredoxin domain-containing protein 5 OS=Mus musculus OX=10090 GN=Txndc5 PE=1 SV=2	58	18	160	18	105.687	449.72	18	46.4	1.05527e+07	6.68432e+07	7.19463e+07	5.11231e+07	1.89619e+07	7.12457e+07	1.93655e+07	4.1649e+07	6.38618e+07	5.81214e+07	6.00117e+07	11	18	18	17	13	17	13	17	14	15	16	11	18	18	17	13	17	13	17	14	15	16
P17182	13806	Eno1	FALSE	Alpha-enolase OS=Mus musculus OX=10090 GN=Eno1 PE=1 SV=3	53	19	159	19	82.528	482.29	19	47.1	1.21885e+07	3.14214e+07	3.98284e+07	2.28654e+07	2.05465e+07	3.84288e+07	1.5394e+07	2.59951e+07	2.50271e+07	5.49534e+07	2.72453e+07	14	17	18	17	14	17	15	15	15	18	16	14	17	18	17	14	17	15	15	15	18	16
Q5HZI1	102103	Mtus1	FALSE	Microtubule-associated tumor suppressor 1 homolog OS=Mus musculus OX=10090 GN=Mtus1 PE=1 SV=2	37	34	159	34	131.873	436	34	134.3	1.91749e+07	1.88925e+07	1.7749e+07	1.89571e+07	2.30524e+07	6.14789e+06	9.11791e+06	1.20158e+07	1.12082e+07	9.90168e+06	2.04098e+07	24	27	26	31	26	21	21	24	24	24	27	24	27	26	31	26	21	21	24	24	24	27
P16858	14433	Gapdh	FALSE	Glyceraldehyde-3-phosphate dehydrogenase OS=Mus musculus OX=10090 GN=Gapdh PE=1 SV=2	43	11	159	11	68.876	417.46	11	35.8	2.22008e+07	3.95739e+07	4.22145e+07	4.13089e+07	3.90837e+07	3.3868e+07	1.96534e+07	2.80331e+07	3.46224e+07	4.74493e+07	4.18481e+07	9	11	10	10	10	10	9	10	10	11	10	9	11	10	10	10	10	9	10	10	11	10
Q9WTX5	21402	Skp1	FALSE	S-phase kinase-associated protein 1 OS=Mus musculus OX=10090 GN=Skp1 PE=1 SV=3	80	12	157	12	71.144	496.47	12	18.7	8.3793e+06	2.49043e+07	2.74227e+07	3.18668e+07	1.08171e+07	5.43387e+07	2.4371e+07	3.37793e+07	6.69291e+07	6.19892e+07	4.29634e+07	7	10	11	11	9	10	11	10	12	11	11	7	10	11	11	9	10	11	10	12	11	11
Q9DCW4	110826	Etfb	TRUE	Electron transfer flavoprotein subunit beta OS=Mus musculus OX=10090 GN=Etfb PE=1 SV=3	43	12	157	12	50.38	448.16	12	27.6	7.90776e+07	7.20013e+07	6.83468e+07	7.34452e+07	1.01463e+08	1.12469e+08	1.78332e+08	2.01219e+08	2.83639e+08	2.10863e+08	1.91844e+08	11	11	11	10	10	11	11	11	12	11	11	11	11	11	10	10	11	11	11	12	11	11
P70296	23980	Pebp1	FALSE	Phosphatidylethanolamine-binding protein 1 OS=Mus musculus OX=10090 GN=Pebp1 PE=1 SV=3	90	12	155	12	66.445	479.17	12	20.8	3.57571e+07	9.03895e+07	1.034e+08	6.90452e+07	5.88414e+07	1.14655e+08	5.39753e+07	6.09336e+07	1.15133e+08	1.51016e+08	1.1247e+08	11	12	12	12	12	12	12	12	12	12	12	11	12	12	12	12	12	12	12	12	12	12
Q3URD3	83997	Slmap	FALSE	Sarcolemmal membrane-associated protein OS=Mus musculus OX=10090 GN=Slmap PE=1 SV=2	23	22	155	22	99.695	415.68	22	96.9	1.27053e+07	1.76814e+07	1.74605e+07	1.69238e+07	1.38676e+07	2.47195e+07	1.89791e+07	1.73062e+07	2.71022e+07	1.92785e+07	2.5567e+07	19	20	19	18	17	18	17	19	19	20	20	19	20	19	18	17	18	17	19	19	20	20
P10637	17762	Mapt	FALSE	Microtubule-associated protein tau OS=Mus musculus OX=10090 GN=Mapt PE=1 SV=3	39	18	155	18	88.079	452.59	18	76.2	1.31713e+07	1.91877e+07	2.00122e+07	2.74973e+07	2.38039e+07	2.15387e+07	1.54345e+07	2.10411e+07	3.08314e+07	2.28161e+07	2.93263e+07	16	17	17	17	18	16	18	17	17	16	17	16	17	17	17	18	16	18	17	17	16	17
Q6PAM1	109658	Txlna	FALSE	Alpha-taxilin OS=Mus musculus OX=10090 GN=Txlna PE=1 SV=1	44	25	154	24	103.894	394.95	25	62.3	1.99286e+07	1.58508e+07	1.7333e+07	1.87123e+07	2.16318e+07	1.32812e+07	1.1306e+07	1.19216e+07	2.61719e+07	1.3412e+07	2.25607e+07	24	23	23	24	25	23	22	22	24	22	23	24	23	23	24	25	23	22	22	24	22	23
Q99JB8	80708	Pacsin3	FALSE	Protein kinase C and casein kinase II substrate protein 3 OS=Mus musculus OX=10090 GN=Pacsin3 PE=1 SV=1	52	17	154	17	81.931	441.79	17	48.6	1.03467e+07	2.44119e+07	3.11146e+07	2.18882e+07	1.73893e+07	2.2909e+07	13209437	2.82687e+07	4.1968e+07	2.55428e+07	2.18059e+07	13	14	17	17	16	14	13	15	16	16	14	13	14	17	17	16	14	13	15	16	16	14
Q8K0E8	110135	Fgb	FALSE	Fibrinogen beta chain OS=Mus musculus OX=10090 GN=Fgb PE=1 SV=1	54	22	154	22	102.796	448.96	22	54.7	1.55651e+07	3.87805e+07	3.43362e+07	4.2964e+07	1.35595e+07	3.51435e+07	6.97575e+06	1.73671e+07	1.49258e+07	1.553e+07	1.80185e+07	17	22	21	22	17	22	13	19	16	19	19	17	22	21	22	17	22	13	19	16	19	19
Q91XF0	103711	Pnpo	TRUE	Pyridoxine-5'-phosphate oxidase OS=Mus musculus OX=10090 GN=Pnpo PE=1 SV=1	42	13	154	13	89.033	419.1	13	30.1	2.60229e+07	9.72389e+07	9.94276e+07	6.82187e+07	5.25347e+07	7.0924e+07	3.75434e+07	75465929	8.95202e+07	9.58979e+07	9.93268e+07	10	12	12	13	12	12	11	12	13	13	13	10	12	12	13	12	12	11	12	13	13	13
Q62393	21985	Tpd52	FALSE	Tumor protein D52 OS=Mus musculus OX=10090 GN=Tpd52 PE=1 SV=2	69	14	153	14	75.066	505.6	14	24.3	6.84759e+07	5.7903e+07	5.75129e+07	8.20143e+07	1.127e+08	5.17038e+07	6.31057e+07	6.45291e+07	1.49306e+08	7.14146e+07	1.34845e+08	13	11	11	12	11	12	13	12	13	13	13	13	11	11	12	11	12	13	12	13	13	13
Q9D6S7	67871	Mrrf	TRUE	Ribosome-recycling factor, mitochondrial OS=Mus musculus OX=10090 GN=Mrrf PE=1 SV=1	48	12	153	12	98.055	484.09	12	29	1.30595e+07	1.46655e+07	1.41441e+07	1.27294e+07	1.68597e+07	3.55917e+07	3.92229e+07	5.0805e+07	8.26115e+07	8.35705e+07	3.6301e+07	10	9	11	10	8	10	12	10	12	12	11	10	9	11	10	8	10	12	10	12	12	11
O55111	13511	Dsg2	FALSE	Desmoglein-2 OS=Mus musculus OX=10090 GN=Dsg2 PE=1 SV=3	23	16	152	16	83.246	491.95	16	122.3	1.71923e+07	2.09747e+07	1.96512e+07	1.94795e+07	2.13562e+07	1.28416e+07	1.5168e+07	1.82076e+07	3.07653e+07	2.05358e+07	2.68948e+07	15	16	15	16	15	13	15	15	14	15	15	15	16	15	16	15	13	15	15	14	15	15
O54724	19285	Cavin1	FALSE	Caveolae-associated protein 1 OS=Mus musculus OX=10090 GN=Cavin1 PE=1 SV=1	48	17	151	17	87.111	449.61	17	43.9	4.07108e+06	1.23286e+07	1.4839e+07	3.4723e+07	1.09365e+07	7.76649e+07	8.68704e+06	1.5215e+07	2.02447e+07	1.43278e+07	3.20527e+07	10	15	16	17	14	17	16	15	17	16	17	10	15	16	17	14	17	16	15	17	16	17
O88735	17761	Map7	FALSE	Ensconsin OS=Mus musculus OX=10090 GN=Map7 PE=1 SV=1	33	21	151	19	76.358	376.6	21	82	2.46009e+07	1.91039e+07	2.31568e+07	1.93879e+07	3.16576e+07	1.80005e+07	2.67774e+07	3.04082e+07	4.57529e+07	3.31632e+07	3.43025e+07	19	20	20	20	21	20	20	20	20	20	21	19	20	20	20	21	20	20	20	20	20	21
A2A7S8	97130	C77080	FALSE	Uncharacterized protein KIAA1522 OS=Mus musculus OX=10090 GN=Kiaa1522 PE=1 SV=1	36	23	151	23	105.71	448.13	23	104.8	9.9765e+06	6.9752e+06	8.02471e+06	6.88245e+06	1.39227e+07	4.7655e+06	7.79055e+06	1.04288e+07	1.04964e+07	7.39553e+06	1.64197e+07	20	18	18	19	20	13	19	17	20	19	21	20	18	18	19	20	13	19	17	20	19	21
Q8BUK6	320191	Hook3	FALSE	Protein Hook homolog 3 OS=Mus musculus OX=10090 GN=Hook3 PE=1 SV=2	35	23	151	23	92.335	401.62	23	83.2	1.26346e+07	2.37362e+07	2.42281e+07	2.21919e+07	1.77379e+07	1.96546e+07	1.3642e+07	1.82595e+07	2.30314e+07	1.87157e+07	2.61764e+07	22	23	23	23	23	23	23	23	21	23	23	22	23	23	23	23	23	23	23	21	23	23
P26043	19684	Rdx	FALSE	Radixin OS=Mus musculus OX=10090 GN=Rdx PE=1 SV=3	28	23	150	17	79.873	413.91	23	68.5	3.20903e+07	2.79287e+07	2.65374e+07	3.23567e+07	3.48997e+07	2.07776e+07	1.78552e+07	2.48398e+07	3.11774e+07	2.68319e+07	4.1586e+07	20	21	22	21	20	17	19	21	21	22	22	20	21	22	21	20	17	19	21	21	22	22
Q99LP6	17713	Grpel1	TRUE	GrpE protein homolog 1, mitochondrial OS=Mus musculus OX=10090 GN=Grpel1 PE=1 SV=1	59	15	150	15	69.464	403.53	15	24.3	2.19899e+07	5.16718e+07	6.47313e+07	4.68037e+07	3.46356e+07	1.61197e+08	8.91882e+07	1.45495e+08	2.19625e+08	2.28436e+08	1.27134e+08	13	13	14	13	13	13	15	15	15	15	15	13	13	14	13	13	13	15	15	15	15	15
Q9Z2D6	17257	Mecp2	FALSE	Methyl-CpG-binding protein 2 OS=Mus musculus OX=10090 GN=Mecp2 PE=1 SV=1	46	21	150	21	97.307	436.6	21	52.3	1.54456e+07	1.98875e+07	1.95456e+07	3.1041e+07	1.52772e+07	2.17962e+07	1.71756e+07	2.20553e+07	2.76343e+07	2.80247e+07	2.36192e+07	19	20	20	20	19	18	19	20	20	20	20	19	20	20	20	19	18	19	20	20	20	20
Q01853	269523	Vcp	FALSE	Transitional endoplasmic reticulum ATPase OS=Mus musculus OX=10090 GN=Vcp PE=1 SV=4	31	21	149	21	96.125	410.69	21	89.3	1.36264e+07	1.88017e+07	2.22264e+07	20132370	2.15696e+07	1.75941e+07	1.01153e+07	1.2396e+07	2.23325e+07	2.42536e+07	1.90311e+07	19	20	20	18	19	19	16	16	16	20	18	19	20	20	18	19	19	16	16	16	20	18
Q9Z1M8	24010	Ik	FALSE	Protein Red OS=Mus musculus OX=10090 GN=Ik PE=1 SV=2	48	21	149	21	83.184	383.72	21	65.6	1.2248e+07	1.7249e+07	1.45376e+07	1.37494e+07	1.74727e+07	1.25975e+07	1.15646e+07	1.35406e+07	2.57588e+07	1.50742e+07	1.75757e+07	17	20	20	19	21	18	19	19	20	18	20	17	20	20	19	21	18	19	19	20	18	20
Q8K019	72567	Bclaf1	FALSE	Bcl-2-associated transcription factor 1 OS=Mus musculus OX=10090 GN=Bclaf1 PE=1 SV=2	28	24	149	23	93.082	344.44	24	105.9	1.51048e+07	1.47739e+07	1.47052e+07	1.42024e+07	1.755e+07	1.68688e+07	9.61652e+06	1.23128e+07	2.79035e+07	2.17634e+07	2.15759e+07	21	21	20	22	21	22	18	20	22	23	24	21	21	20	22	21	22	18	20	22	23	24
P54227	16765	Stmn1	FALSE	Stathmin OS=Mus musculus OX=10090 GN=Stmn1 PE=1 SV=2	72	19	149	19	73.864	408.23	19	17.3	1.96309e+07	1.59164e+07	1.73256e+07	2.45873e+07	2.8339e+07	7.18039e+07	8.88354e+07	2.26808e+07	2.26776e+08	9.39905e+07	1.78776e+08	14	14	15	15	15	14	15	14	19	18	19	14	14	15	15	15	14	15	14	19	18	19
O35215	13202	Ddt	FALSE	D-dopachrome decarboxylase OS=Mus musculus OX=10090 GN=Ddt PE=1 SV=3	90	8	149	8	51.557	407.4	8	13.1	2.7238e+07	9.66454e+07	9.95927e+07	8.21434e+07	3.66751e+07	8.28446e+07	3.79489e+07	6.97777e+07	7.16069e+07	8.96388e+07	8.23044e+07	8	8	8	8	8	8	8	8	8	8	8	8	8	8	8	8	8	8	8	8	8	8
P20801	21925	Tnnc2	FALSE	Troponin C, skeletal muscle OS=Mus musculus OX=10090 GN=Tnnc2 PE=1 SV=2	89	15	148	14	65.468	296.9	15	18.1	6.0577e+06	161419				3.00227e+08	210121			236894		6	2	1	1	1	15	3	1	1	2	1	6	2	1	1	1	15	3	1	1	2	1
Q9CZ44	386649	Nsfl1c	FALSE	NSFL1 cofactor p47 OS=Mus musculus OX=10090 GN=Nsfl1c PE=1 SV=1	63	20	148	20	88.468	396.97	20	40.7	2.22966e+07	2.88688e+07	3.05879e+07	3.01402e+07	2.42162e+07	3.45032e+07	2.09019e+07	2.68404e+07	3.92875e+07	3.50822e+07	4.50075e+07	20	19	20	20	19	20	20	20	19	19	19	20	19	20	20	19	20	20	20	19	19	19
Q91VA0	117147	Acsm1	TRUE	Acyl-coenzyme A synthetase ACSM1, mitochondrial OS=Mus musculus OX=10090 GN=Acsm1 PE=1 SV=1	36	15	147	15	63.045	465.1	15	64.7	2.21054e+07	2.6074e+07	2.86874e+07	3.03526e+07	3.9224e+07	3.76206e+07	6.1772e+07	9.6116e+07	9.65179e+07	9.27721e+07	8.03671e+07	11	14	13	12	12	12	12	14	12	13	12	11	14	13	12	12	12	12	14	12	13	12
Q9EQU5	56086	Set	FALSE	Protein SET OS=Mus musculus OX=10090 GN=Set PE=1 SV=1	56	15	147	15	77.111	491.94	15	33.4	9.25558e+07	7.2065e+07	6.74458e+07	7.85879e+07	8.94017e+07	1.11101e+08	1.40796e+08	1.22846e+08	2.70488e+08	1.63892e+08	1.50754e+08	11	12	13	11	12	12	13	13	15	13	11	11	12	13	11	12	12	13	13	15	13	11
Q9JKS5	56541	Habp4	FALSE	Intracellular hyaluronan-binding protein 4 OS=Mus musculus OX=10090 GN=Habp4 PE=1 SV=2	42	16	146	16	85.547	381.85	16	45.9	3.74625e+07	2.64523e+07	1.86346e+07	2.40204e+07	3.79302e+07	1.55089e+07	1.98558e+07	1.92354e+07	2.74334e+07	2.01349e+07	3.20788e+07	15	15	15	15	16	14	14	14	15	15	15	15	15	15	15	16	14	14	14	15	15	15
Q80VP1	13854	Epn1	FALSE	Epsin-1 OS=Mus musculus OX=10090 GN=Epn1 PE=1 SV=3	47	17	146	17	78.325	465.15	17	60.2	1.60056e+07	2.35244e+07	2.75018e+07	2.16522e+07	2.20719e+07	1.80719e+07	1.53888e+07	2.22749e+07	3.20282e+07	1.97831e+07	3.01626e+07	13	15	15	16	14	13	13	15	13	13	14	13	15	15	16	14	13	13	15	13	13	14
P31809	26365	Ceacam1	FALSE	Carcinoembryonic antigen-related cell adhesion molecule 1 OS=Mus musculus OX=10090 GN=Ceacam1 PE=1 SV=1	24	9	145	4	67.292	403.01	9	57	2.36223e+07	2.47356e+07	2.90153e+07	3.74948e+07	3.82582e+07	1.69047e+07	1.41964e+07	2.28608e+07	2.28922e+07	1.10656e+07	3.19102e+07	9	9	9	9	9	8	9	9	9	8	9	9	9	9	9	9	8	9	9	9	8	9
Q61316	15525	Hspa4	FALSE	Heat shock 70 kDa protein 4 OS=Mus musculus OX=10090 GN=Hspa4 PE=1 SV=1	21	16	145	15	73.932	376.7	16	94.1	2.97758e+07	3.99358e+07	4.21288e+07	3.61651e+07	2.67523e+07	2.94816e+07	2.31338e+07	2.62208e+07	3.93493e+07	3.79186e+07	4.50894e+07	16	16	16	16	16	16	15	16	15	16	16	16	16	16	16	16	16	15	16	15	16	16
Q80WW9	77006	Ddrgk1	FALSE	DDRGK domain-containing protein 1 OS=Mus musculus OX=10090 GN=Ddrgk1 PE=1 SV=2	59	16	145	16	74.923	397.24	16	36	3.41065e+07	3.15002e+07	3.36001e+07	2.97673e+07	4.71612e+07	2.1882e+07	2.58287e+07	2.68925e+07	2.71497e+07	1.59539e+07	3.02443e+07	15	14	13	13	14	12	12	13	14	12	12	15	14	13	13	14	12	12	13	14	12	12
Q9CR00	67151	Psmd9	FALSE	26S proteasome non-ATPase regulatory subunit 9 OS=Mus musculus OX=10090 GN=Psmd9 PE=1 SV=1	55	13	145	13	68.514	437.27	13	24.7	8.56949e+07	8.02722e+07	7.65827e+07	8.38126e+07	1.08492e+08	8.07725e+07	1.15374e+08	1.29573e+08	1.46541e+08	114854563	1.3928e+08	12	13	13	12	12	12	12	12	12	12	12	12	13	13	12	12	12	12	12	12	12	12
P30999	12388	Ctnnd1	FALSE	Catenin delta-1 OS=Mus musculus OX=10090 GN=Ctnnd1 PE=1 SV=2	33	22	145	22	97.903	404	22	104.9	2.09681e+07	2.47698e+07	2.05392e+07	2.18046e+07	2.86836e+07	1.95182e+07	1.67429e+07	1.89095e+07	3.38589e+07	2.52407e+07	3.23091e+07	16	20	19	19	19	19	17	19	20	19	18	16	20	19	19	19	19	17	19	20	19	18
Q6P5H2	18008	Nes	FALSE	Nestin OS=Mus musculus OX=10090 GN=Nes PE=1 SV=1	23	29	145	29	113.652	447.31	29	207	5.74901e+06	5.55609e+06	6.69391e+06	7.46771e+06	8.18501e+06	9.39089e+06	9.99626e+06	7.87405e+06	1.61032e+07	1.05905e+07	1.60543e+07	22	22	23	23	23	22	26	24	25	23	28	22	22	23	23	23	22	26	24	25	23	28
Q99L13	58875	Hibadh	TRUE	3-hydroxyisobutyrate dehydrogenase, mitochondrial OS=Mus musculus OX=10090 GN=Hibadh PE=1 SV=1	48	14	145	14	82.917	457.17	14	35.4	2.42574e+06	1.5199e+07	1.78969e+07	9.29761e+06	5.47165e+06	5.77159e+07	1.90988e+07	4.30168e+07	4.26938e+07	8.71044e+07	2.55319e+07	10	13	13	13	11	13	12	13	14	14	12	10	13	13	13	11	13	12	13	14	14	12
P10605	13030	Ctsb	FALSE	Cathepsin B OS=Mus musculus OX=10090 GN=Ctsb PE=1 SV=2	46	13	144	13	79.507	410.75	13	37.3	1.28687e+07	3.81986e+07	3.34766e+07	5.63915e+07	2.3401e+07	4.70706e+07	2.28459e+07	2.99086e+07	3.83425e+07	4.87148e+07	3.5547e+07	8	13	11	12	9	13	12	13	13	12	11	8	13	11	12	9	13	12	13	13	12	11
Q9D1J3	66118	Sarnp	FALSE	SAP domain-containing ribonucleoprotein OS=Mus musculus OX=10090 GN=Sarnp PE=1 SV=3	70	12	144	12	63.968	427.11	12	23.5	1.07722e+08	8.02483e+07	6.01753e+07	7.8608e+07	1.51949e+08	4.66479e+07	7.78952e+07	7.49535e+07	1.46032e+08	6.67586e+07	1.27011e+08	11	10	10	11	11	10	11	11	12	11	11	11	10	10	11	11	10	11	11	12	11	11
Q9WV80	56440	Snx1	FALSE	Sorting nexin-1 OS=Mus musculus OX=10090 GN=Snx1 PE=1 SV=1	39	21	144	19	96.408	396.57	21	58.9	9.2615e+06	3.23594e+07	3.14093e+07	2.62212e+07	1.20602e+07	3.78581e+07	1.92843e+07	3.299e+07	4.08946e+07	3.63269e+07	3.2671e+07	18	20	19	19	19	20	18	20	20	20	20	18	20	19	19	19	20	18	20	20	20	20
Q58A65	70834	Spag9	FALSE	C-Jun-amino-terminal kinase-interacting protein 4 OS=Mus musculus OX=10090 GN=Spag9 PE=1 SV=2	22	21	144	21	82.64	383.96	21	146.1	1.56884e+07	1.35984e+07	1.25406e+07	1.42143e+07	1.56161e+07	1.73162e+07	2.07924e+07	2.2045e+07	2.82386e+07	2.61116e+07	2.42318e+07	18	20	18	18	19	16	20	19	20	18	19	18	20	18	18	19	16	20	19	20	18	19
Q9CRD0	68095	Ociad1	TRUE	OCIA domain-containing protein 1 OS=Mus musculus OX=10090 GN=Ociad1 PE=1 SV=1	63	13	143	13	76.895	411.35	13	27.6	1.31003e+07	1.97722e+07	1.95032e+07	1.50635e+07	1.61813e+07	3.88539e+07	3.14678e+07	4.41555e+07	3.96512e+07	5.25419e+07	3.19426e+07	11	11	11	10	10	11	13	12	13	12	11	11	11	11	10	10	11	13	12	13	12	11
Q9WUK2	22384	Eif4h	FALSE	Eukaryotic translation initiation factor 4H OS=Mus musculus OX=10090 GN=Eif4h PE=1 SV=3	63	16	142	16	61.738	340.6	16	27.3	6.36588e+07	5.08887e+07	5.15039e+07	5.66477e+07	7.80033e+07	4.72022e+07	6.70779e+07	6.17698e+07	1.16007e+08	6.40208e+07	9.11887e+07	13	13	13	13	13	13	13	13	16	13	13	13	13	13	13	13	13	13	13	16	13	13
Q60936	67426	Coq8a	TRUE	Atypical kinase COQ8A, mitochondrial OS=Mus musculus OX=10090 GN=Coq8a PE=1 SV=2	19	7	141	7	49.81	512.16	7	71.7	6.82017e+06	2.42776e+07	2.72067e+07	2.53681e+07	1.28867e+07	1.48116e+07	6.57898e+06	1.03745e+07	1.98708e+07	1.45053e+07	2.55726e+07	7	7	7	7	7	7	6	7	6	6	6	7	7	7	7	7	7	6	7	6	6	6
Q9CR16	67738	Ppid	FALSE	Peptidyl-prolyl cis-trans isomerase D OS=Mus musculus OX=10090 GN=Ppid PE=1 SV=3	49	19	140	19	74.952	385.02	19	40.7	5.35613e+06	4.08066e+07	4.44033e+07	2.8773e+07	8.50511e+06	4.82311e+07	1.51428e+07	3.32684e+07	3.09209e+07	5.11061e+07	3.28735e+07	12	18	17	18	12	19	13	17	16	16	15	12	18	17	18	12	19	13	17	16	16	15
Q80WT5	216549	Aftph	FALSE	Aftiphilin OS=Mus musculus OX=10090 GN=Aftph PE=1 SV=2	33	21	140	21	104.537	407.11	21	101.1	6.91347e+06	7.75967e+06	9.51069e+06	8.25701e+06	8.70453e+06	8.33089e+06	7.05797e+06	8.32879e+06	1.37276e+07	1.18206e+07	1.42711e+07	16	19	18	18	18	16	18	18	17	18	19	16	19	18	18	18	16	18	18	17	18	19
Q99K41	100952	Emilin1	FALSE	EMILIN-1 OS=Mus musculus OX=10090 GN=Emilin1 PE=1 SV=1	28	21	140	21	94.298	430.89	21	107.5	6.27919e+06	1.31172e+07	1.27502e+07	1.35054e+07	9.6959e+06	2.20181e+07	8.84155e+06	1.13677e+07	2.0366e+07	2.22641e+07	2.19143e+07	17	20	19	21	18	20	19	19	19	20	19	17	20	19	21	18	20	19	19	19	20	19
Q9DBP5	66588	Cmpk1	FALSE	UMP-CMP kinase OS=Mus musculus OX=10090 GN=Cmpk1 PE=1 SV=1	65	13	139	13	67.764	363.54	13	22.2	1.17097e+07	2.22789e+07	2.47372e+07	1.94069e+07	1.53474e+07	3.04656e+07	1.27513e+07	1.6797e+07	2.5668e+07	3.46875e+07	2.46732e+07	10	12	13	12	12	12	11	12	12	13	12	10	12	13	12	12	12	11	12	12	13	12
P56213	11692	Gfer	TRUE	FAD-linked sulfhydryl oxidase ALR OS=Mus musculus OX=10090 GN=Gfer PE=1 SV=2	75	13	139	13	63.013	352.45	13	22.9	1.54226e+07	2.67942e+07	2.55581e+07	2.21641e+07	2.36724e+07	6.44903e+07	5.77459e+07	1.02895e+08	1.15138e+08	9.13138e+07	5.86414e+07	11	12	12	13	13	13	13	13	13	13	13	11	12	12	13	13	13	13	13	13	13	13
Q501J7	100169	Phactr4	FALSE	Phosphatase and actin regulator 4 OS=Mus musculus OX=10090 GN=Phactr4 PE=1 SV=2	46	23	138	23	95.464	403.17	23	76.6	2.2273e+07	1.39108e+07	1.41888e+07	1.19105e+07	2.03409e+07	6.76104e+06	1.21821e+07	1.17457e+07	2.10361e+07	1.13466e+07	1.75743e+07	22	22	21	21	22	16	20	19	21	21	21	22	22	21	21	22	16	20	19	21	21	21
Q62384	22687	Zpr1	FALSE	Zinc finger protein ZPR1 OS=Mus musculus OX=10090 GN=Zpr1 PE=1 SV=1	53	19	137	19	103.697	381.25	19	50.7	5.25779e+06	9.33051e+06	1.04867e+07	7.97871e+06	5.70076e+06	1.93819e+07	2.3144e+07	2.14448e+07	5.95771e+07	4.07108e+07	1.90162e+07	14	13	14	14	13	15	16	16	18	18	17	14	13	14	14	13	15	16	16	18	18	17
Q61733	57312	Mrps31	TRUE	28S ribosomal protein S31, mitochondrial OS=Mus musculus OX=10090 GN=Mrps31 PE=1 SV=1	54	21	137	20	104.036	400.12	21	43.9	1.11001e+07	1.51624e+07	1.59857e+07	1.39741e+07	1.88043e+07	3.00196e+07	2.74377e+07	4.73077e+07	5.61379e+07	4.31397e+07	3.1989e+07	17	17	18	16	17	19	20	20	21	20	19	17	17	18	16	17	19	20	20	21	20	19
Q8BH97	52377	Rcn3	FALSE	Reticulocalbin-3 OS=Mus musculus OX=10090 GN=Rcn3 PE=1 SV=1	62	15	137	15	97.584	379.79	15	38	9.621e+06	1.25705e+07	1.27758e+07	2.11444e+07	1.42709e+07	2.32133e+07	1.94342e+07	1.8674e+07	3.54354e+07	2.45776e+07	3.87576e+07	12	12	13	13	13	10	14	11	15	13	15	12	12	13	13	13	10	14	11	15	13	15
O08585	12757	Clta	FALSE	Clathrin light chain A OS=Mus musculus OX=10090 GN=Clta PE=1 SV=2	31	14	136	14	44.932	307.79	14	25.6	1.88988e+08	1.48112e+08	1.48159e+08	1.72525e+08	1.94821e+08	1.5494e+08	2.0314e+08	2.07361e+08	3.92553e+08	2.80828e+08	3.30849e+08	12	12	11	11	11	11	12	12	14	13	12	12	12	11	11	11	11	12	12	14	13	12
C0HKD9	67532	Mfap1a	FALSE	Microfibrillar-associated protein 1B OS=Mus musculus OX=10090 GN=Mfap1b PE=1 SV=1	42	19	136	19	72.625	334.93	19	51.9	2.62954e+07	2.01443e+07	1.87634e+07	1.86284e+07	2.95378e+07	1.44755e+07	1.88985e+07	1.80411e+07	3.58313e+07	2.20642e+07	2.84086e+07	17	17	17	16	18	17	17	17	18	17	16	17	17	17	16	18	17	17	17	18	17	16
P34022	19385	Ranbp1	FALSE	Ran-specific GTPase-activating protein OS=Mus musculus OX=10090 GN=Ranbp1 PE=1 SV=2	69	11	136	11	54.422	394.17	11	23.6	5.32225e+07	4.85092e+07	4.71042e+07	6.01603e+07	6.01762e+07	6.35614e+07	6.55693e+07	5.96375e+07	1.43344e+08	8.40191e+07	9.87384e+07	11	11	11	11	10	11	11	11	11	11	11	11	11	11	11	10	11	11	11	11	11	11
P28656	53605	Nap1l1	FALSE	Nucleosome assembly protein 1-like 1 OS=Mus musculus OX=10090 GN=Nap1l1 PE=1 SV=2	42	12	135	11	75.507	393.39	12	45.3	4.73544e+06	2.06464e+07	1.80055e+07	1.71016e+07	5.30468e+06	3.77645e+07	1.96641e+07	2.6389e+07	4.66587e+07	3.55298e+07	2.57912e+07	10	12	12	12	11	12	12	12	12	12	12	10	12	12	12	11	12	12	12	12	12	12
O08997	11927	Atox1	FALSE	Copper transport protein ATOX1 OS=Mus musculus OX=10090 GN=Atox1 PE=1 SV=1	100	10	135	10	58.595	452.59	10	7.3	1.89034e+08	1.65013e+08	1.46715e+08	2.45564e+08	3.52771e+08	2.30176e+08	3.07336e+08	2.95551e+08	5.05925e+08	4.04132e+08	3.36146e+08	9	10	9	10	10	10	9	9	9	9	10	9	10	9	10	10	10	9	9	9	9	10
P26645	17118	Marcks	FALSE	Myristoylated alanine-rich C-kinase substrate OS=Mus musculus OX=10090 GN=Marcks PE=1 SV=2	59	13	135	13	75.59	457.43	13	29.6	2.21719e+07	1.95863e+07	2.00925e+07	2.46001e+07	3.35472e+07	2.5873e+07	2.82933e+07	2.35661e+07	5.19486e+07	3.01369e+07	4.64054e+07	11	12	11	11	11	11	11	11	13	11	11	11	12	11	11	11	11	11	11	13	11	11
P10711	21399	Tcea1	FALSE	Transcription elongation factor A protein 1 OS=Mus musculus OX=10090 GN=Tcea1 PE=1 SV=2	70	20	135	20	86.16	357.94	20	33.9	1.37236e+07	1.87958e+07	1.58287e+07	1.45534e+07	1.68088e+07	1.69297e+07	1.71923e+07	1.9019e+07	4.17948e+07	2.32684e+07	2.30671e+07	16	17	16	18	17	17	16	16	19	19	15	16	17	16	18	17	17	16	16	19	19	15
Q0P678	76014	Zc3h18	FALSE	Zinc finger CCCH domain-containing protein 18 OS=Mus musculus OX=10090 GN=Zc3h18 PE=1 SV=1	32	18	135	18	87.179	369.65	18	105.6	1.12558e+07	1.11473e+07	1.11731e+07	1.06551e+07	1.32644e+07	1.15848e+07	7.58363e+06	9.21155e+06	1.49885e+07	1.17085e+07	1.47617e+07	18	18	18	18	17	18	18	18	18	18	18	18	18	18	18	17	18	18	18	18	18	18
P27661	15270	H2ax	FALSE	Histone H2AX OS=Mus musculus OX=10090 GN=H2ax PE=1 SV=2	64	9	134	2	39.411	340.75	9	15.1	9.70456e+06	2.33669e+07	1.81837e+07	1.66912e+07	2.02022e+07	2.62924e+07	8.56676e+06	1.82122e+07	2.73426e+07	3.53695e+07	2.15267e+07	7	8	8	8	8	7	7	8	9	8	8	7	8	8	8	8	7	7	8	9	8	8
P19536	12859	Cox5b	TRUE	Cytochrome c oxidase subunit 5B, mitochondrial OS=Mus musculus OX=10090 GN=Cox5b PE=1 SV=1	59	9	134	9	44.449	326.35	9	13.8	4.4683e+07	7.3869e+07	8.96323e+07	8.62336e+07	7.30605e+07	3.76716e+07	1.57963e+07	1.06325e+07	6.52724e+07	4.34985e+07	7.01302e+07	8	8	8	9	8	7	8	7	8	8	8	8	8	8	9	8	7	8	7	8	8	8
Q91X72	15458	Hpx	FALSE	Hemopexin OS=Mus musculus OX=10090 GN=Hpx PE=1 SV=2	45	19	134	19	75.887	333.72	19	51.3	1.26643e+07	3.18158e+07	3.21487e+07	5.12508e+07	1.18964e+07	8.19257e+07	1.64548e+07	3.64817e+07	1.82051e+07	2.61892e+07	4.38362e+07	15	18	17	18	12	19	16	17	14	17	17	15	18	17	18	12	19	16	17	14	17	17
Q99KG5	54135	Lsr	FALSE	Lipolysis-stimulated lipoprotein receptor OS=Mus musculus OX=10090 GN=Lsr PE=1 SV=1	32	17	134	17	72.201	303.66	17	66.1	2.62782e+07	1.96066e+07	1.64636e+07	1.6826e+07	2.81846e+07	9.96302e+06	9.81241e+06	1.23063e+07	1.04866e+07	8.91026e+06	2.44634e+07	16	17	17	15	16	12	13	14	13	14	16	16	17	17	15	16	12	13	14	13	14	16
P29341	18458	Pabpc1	FALSE	Polyadenylate-binding protein 1 OS=Mus musculus OX=10090 GN=Pabpc1 PE=1 SV=2	21	8	133	8	60.984	492.81	8	70.6	7.56093e+07	4.54572e+07	3.67167e+07	4.58316e+07	7.01781e+07	2.56077e+07	3.68947e+07	4.88607e+07	4.53056e+07	3.85958e+07	7.54632e+07	6	8	8	7	6	6	5	7	7	7	6	6	8	8	7	6	6	5	7	7	7	6
Q9CQX8	66128	Mrps36	TRUE	28S ribosomal protein S36, mitochondrial OS=Mus musculus OX=10090 GN=Mrps36 PE=1 SV=1	71	5	133	5	63.144	398.26	5	11.1	4.92384e+07	3.65633e+07	2.94903e+07	4.45586e+07	7.72789e+07	6.52435e+07	1.14472e+08	1.34811e+08	1.51876e+08	1.04392e+08	1.00624e+08	5	5	5	5	5	5	5	5	5	5	5	5	5	5	5	5	5	5	5	5	5	5
Q01768	18103	Nme2	FALSE	Nucleoside diphosphate kinase B OS=Mus musculus OX=10090 GN=Nme2 PE=1 SV=1	74	11	133	6	62.506	360.58	11	17.4	3.03293e+06	1.37519e+07	1.45952e+07	1.06395e+07	7.24584e+06	3.18566e+07	7.04257e+06	1.91391e+07	1.45921e+07	3.56958e+07	1.32599e+07	9	10	10	9	10	11	10	11	11	11	11	9	10	10	9	10	11	10	11	11	11	11
O89086	19652	Rbm3	FALSE	RNA-binding protein 3 OS=Mus musculus OX=10090 GN=Rbm3 PE=1 SV=1	73	10	133	10	60.258	366.78	10	16.6	3.91677e+07	3.16144e+07	2.51395e+07	3.80274e+07	4.70369e+07	8.06456e+07	1.36214e+08	1.51083e+08	3.28313e+08	1.82217e+08	1.02374e+08	9	8	8	9	9	8	9	9	10	9	9	9	8	8	9	9	8	9	9	10	9	9
Q9DBJ1	18648	Pgam1	FALSE	Phosphoglycerate mutase 1 OS=Mus musculus OX=10090 GN=Pgam1 PE=1 SV=3	71	13	133	9	92.848	393.36	13	28.8	8.88438e+06	1.45269e+07	1.45503e+07	1.07016e+07	1.34184e+07	1.94065e+07	1.19122e+07	1.79184e+07	1.94508e+07	2.75723e+07	1.50711e+07	12	13	13	12	12	13	13	13	11	13	12	12	13	13	12	12	13	13	13	11	13	12
Q9WV55	30960	Vapa	FALSE	Vesicle-associated membrane protein-associated protein A OS=Mus musculus OX=10090 GN=Vapa PE=1 SV=2	48	11	133	10	72.459	354.01	11	27.8	2.33462e+07	3.91067e+07	4.10224e+07	2.89511e+07	2.95417e+07	4.36738e+07	2.40129e+07	4.04597e+07	3.22175e+07	5.47775e+07	4.18571e+07	11	11	11	11	11	11	11	11	11	11	11	11	11	11	11	11	11	11	11	11	11	11
P34927	11889	Asgr1	FALSE	Asialoglycoprotein receptor 1 OS=Mus musculus OX=10090 GN=Asgr1 PE=1 SV=4	57	13	133	13	67.031	351.13	13	32.6	2.82511e+07	1.08047e+08	1.34257e+08	8.67151e+07	4.21962e+07	7.26546e+07	2.50845e+07	5.40917e+07	4.54426e+07	4.24884e+07	7.43711e+07	12	13	13	12	11	12	10	11	11	12	13	12	13	13	12	11	12	10	11	11	12	13
P05202	14719	Got2	TRUE	Aspartate aminotransferase, mitochondrial OS=Mus musculus OX=10090 GN=Got2 PE=1 SV=1	40	17	133	17	74.291	384.84	17	47.4	9.72318e+06	1.64684e+07	2.06081e+07	1.64413e+07	1.58837e+07	3.18979e+07	3.00806e+07	4.74399e+07	5.19018e+07	5.89768e+07	2.76813e+07	13	16	16	16	14	16	16	16	17	16	15	13	16	16	16	14	16	16	16	17	16	15
Q8C5W0	94040	Clmn	FALSE	Calmin OS=Mus musculus OX=10090 GN=Clmn PE=1 SV=2	29	20	132	20	94.31	354.54	20	117.2	1.4633e+07	1.52504e+07	1.18905e+07	1.32061e+07	1.355e+07	9.12529e+06	6.88578e+06	9.45201e+06	5.74002e+06	1.09658e+07	1.44391e+07	17	20	20	18	18	18	17	17	16	18	18	17	20	20	18	18	18	17	17	16	18	18
P30681	97165	Hmgb2	FALSE	High mobility group protein B2 OS=Mus musculus OX=10090 GN=Hmgb2 PE=1 SV=3	71	15	132	12	67.997	364	15	24.1	1.56253e+07	2.02894e+07	1.65583e+07	2.05466e+07	1.97602e+07	2.74842e+07	2.23908e+07	2.22701e+07	7.16549e+07	3.47045e+07	4.99977e+07	14	12	13	14	14	12	13	14	15	14	14	14	12	13	14	14	12	13	14	15	14	14
Q8BFW7	210126	Lpp	FALSE	Lipoma-preferred partner homolog OS=Mus musculus OX=10090 GN=Lpp PE=1 SV=1	32	12	132	12	78.437	398.28	12	65.8	1.83166e+07	1.57597e+07	1.1845e+07	1.64135e+07	1.83284e+07	1.5952e+07	2.19396e+07	2.10554e+07	3.09877e+07	2.27837e+07	3.19079e+07	11	10	11	11	11	11	10	11	11	11	12	11	10	11	11	11	11	10	11	11	11	12
P48193	269587	Epb41	FALSE	Protein 4.1 OS=Mus musculus OX=10090 GN=Epb41 PE=1 SV=2	20	14	132	12	56.554	362.37	14	95.9	4.06132e+07	2.84095e+07	2.57624e+07	2.72939e+07	3.23985e+07	1.15457e+07	1.7849e+07	2.41784e+07	2.29426e+07	2.16331e+07	3.62215e+07	13	14	13	13	14	8	12	12	10	12	13	13	14	13	13	14	8	12	12	10	12	13
Q05186	19672	Rcn1	FALSE	Reticulocalbin-1 OS=Mus musculus OX=10090 GN=Rcn1 PE=1 SV=1	57	18	132	18	76.432	331.16	18	38.1	2.33708e+07	2.81885e+07	2.74184e+07	2.93005e+07	2.41183e+07	2.90574e+07	2.89797e+07	2.81246e+07	4.24833e+07	3.81023e+07	5.38766e+07	16	16	16	15	15	14	17	16	17	16	16	16	16	16	15	15	14	17	16	17	16	16
Q61033	21917	Tmpo	FALSE	Lamina-associated polypeptide 2, isoforms alpha/zeta OS=Mus musculus OX=10090 GN=Tmpo PE=1 SV=4	25	13	131	2	69.391	451.88	13	75.1	337321	376757	360481	232886	290502	315323	342137	354002	495767	459667	552031	12	12	13	12	12	12	12	12	12	12	12	12	12	13	12	12	12	12	12	12	12	12
P19157	14870	Gstp1	FALSE	Glutathione S-transferase P 1 OS=Mus musculus OX=10090 GN=Gstp1 PE=1 SV=2	54	7	130	7	50.75	421.84	7	23.6	2.07945e+07	1.58707e+07	1.80462e+07	1.10091e+07	3.61625e+07	1.15438e+08	2.97369e+07	6.72887e+07	2.84166e+07	1.01757e+08	2.63985e+07	6	6	6	5	6	7	6	6	6	6	6	6	6	6	5	6	7	6	6	6	6	6
P67778	18673	Phb	TRUE	Prohibitin OS=Mus musculus OX=10090 GN=Phb PE=1 SV=1	66	15	129	15	71.742	400.99	15	29.8	8.61877e+06	3.36707e+07	37799524	2.42145e+07	9.11344e+06	7.92393e+07	2.61995e+07	5.72824e+07	4.05228e+07	1.39402e+08	3.98215e+07	13	15	14	14	14	15	15	15	14	15	14	13	15	14	14	14	15	15	15	14	15	14
P97493	56551	Txn2	TRUE	Thioredoxin, mitochondrial OS=Mus musculus OX=10090 GN=Txn2 PE=1 SV=1	42	7	129	7	42.423	390.34	7	18.2	1.94537e+07	3.64567e+07	3.31977e+07	3.77273e+07	2.9087e+07	5.02807e+07	4.20149e+07	7.09162e+07	1.07648e+08	1.22308e+08	8.23691e+07	6	7	7	7	6	7	7	7	7	7	7	6	7	7	7	6	7	7	7	7	7	7
Q99PG2	72075	Ogfr	FALSE	Opioid growth factor receptor OS=Mus musculus OX=10090 GN=Ogfr PE=1 SV=1	44	20	129	20	90.874	384.52	20	70.6	1.46177e+07	1.61024e+07	1.45863e+07	1.27274e+07	11830932	1.12139e+07	7.88398e+06	1.0267e+07	1.1499e+07	1.36354e+07	2.03172e+07	14	18	17	15	10	13	17	15	17	16	16	14	18	17	15	10	13	17	15	17	16	16
O08715	11640	Akap1	TRUE	A-kinase anchor protein 1, mitochondrial OS=Mus musculus OX=10090 GN=Akap1 PE=1 SV=4	33	18	128	18	70.323	395.87	18	92.1	3.16368e+07	1.86583e+07	1.86911e+07	1.61105e+07	2.72967e+07	1.15971e+07	1.90414e+07	2.06565e+07	1.48317e+07	1.62171e+07	2.71695e+07	17	17	16	18	17	14	16	16	13	16	16	17	17	16	18	17	14	16	16	13	16	16
Q9CXI5	74840	Manf	FALSE	Mesencephalic astrocyte-derived neurotrophic factor OS=Mus musculus OX=10090 GN=Manf PE=1 SV=1	45	10	128	10	45.947	382.97	10	20.4	3.70221e+07	5.32418e+07	4.51959e+07	5.8373e+07	5.7738e+07	4.85859e+07	2.49967e+07	3.69065e+07	5.25822e+07	3.41289e+07	5.1513e+07	9	10	10	10	10	9	10	10	10	10	10	9	10	10	10	10	9	10	10	10	10	10
P19783	12857	Cox4i1	TRUE	Cytochrome c oxidase subunit 4 isoform 1, mitochondrial OS=Mus musculus OX=10090 GN=Cox4i1 PE=1 SV=2	56	12	128	12	63.372	329	12	19.5	2.50999e+07	1.18449e+08	1.41852e+08	8.39768e+07	5.06087e+07	9.58792e+07	8.12023e+07	9.7975e+07	1.4922e+08	1.82375e+08	7.8996e+07	9	12	12	12	11	12	9	9	9	10	10	9	12	12	12	11	12	9	9	9	10	10
Q8VIJ6	71514	Sfpq	FALSE	Splicing factor, proline- and glutamine-rich OS=Mus musculus OX=10090 GN=Sfpq PE=1 SV=1	31	18	128	17	74.584	325.45	18	75.4	1.09131e+07	1.03834e+07	1.15554e+07	1.25611e+07	1.21176e+07	9.27391e+06	6.38422e+06	8.67491e+06	1.64777e+07	1.42651e+07	1.49336e+07	16	16	16	16	16	16	15	15	17	17	16	16	16	16	16	16	16	15	15	17	17	16
Q9D6J5	67264	Ndufb8	TRUE	NADH dehydrogenase [ubiquinone] 1 beta subcomplex subunit 8, mitochondrial OS=Mus musculus OX=10090 GN=Ndufb8 PE=1 SV=1	58	8	128	8	77.618	337.6	8	21.9	1.11349e+07	2.27113e+07	1.95217e+07	1.21269e+07	1.05348e+07	6.30583e+07	3.71314e+07	7.39281e+07	4.84525e+07	6.59558e+07	4.14866e+07	7	8	8	8	7	8	8	8	7	8	8	7	8	8	8	7	8	8	8	7	8	8
Q91WS0	52637	Cisd1	TRUE	CDGSH iron-sulfur domain-containing protein 1 OS=Mus musculus OX=10090 GN=Cisd1 PE=1 SV=1	74	7	128	7	56.028	392.42	7	12.1	5.19589e+07	5.55862e+07	5.32811e+07	4.60149e+07	7.71904e+07	1.0938e+08	1.74543e+08	2.31249e+08	1.31754e+08	1.63368e+08	1.17253e+08	7	7	7	7	7	7	7	7	7	7	7	7	7	7	7	7	7	7	7	7	7	7
P31725	20202	S100a9	FALSE	Protein S100-A9 OS=Mus musculus OX=10090 GN=S100a9 PE=1 SV=3	52	8	128	8	34.531	325.76	8	13	2.04001e+07	1.09366e+07	1.35645e+07	1.55233e+07	2.59052e+07	81787805	3.57957e+07	5.00751e+07	9.75304e+07	1.31307e+08	6.81714e+07	7	7	7	7	7	7	7	7	8	8	7	7	7	7	7	7	7	7	7	8	8	7
P47738	11669	Aldh2	TRUE	Aldehyde dehydrogenase, mitochondrial OS=Mus musculus OX=10090 GN=Aldh2 PE=1 SV=1	43	16	127	15	65.578	344.41	16	56.5	5.9981e+06	1.74929e+07	2.06329e+07	1.31788e+07	1.18115e+07	2.05963e+07	1.27558e+07	2.1737e+07	1.79266e+07	3.16367e+07	1.88648e+07	12	15	15	11	12	12	12	12	13	16	13	12	15	15	11	12	12	12	12	13	16	13
P28653	12111	Bgn	FALSE	Biglycan OS=Mus musculus OX=10090 GN=Bgn PE=1 SV=1	46	14	127	13	70.847	371.95	14	41.6	2.26344e+06	1.87419e+07	1.09203e+07	2.93708e+07	3.99102e+06	1.24924e+08	6.14593e+06	9.16523e+06	1.71968e+07	2.09508e+07	1.69125e+07	8	12	12	13	10	13	10	12	13	11	12	8	12	12	13	10	13	10	12	13	11	12
P14733	16906	Lmnb1	FALSE	Lamin-B1 OS=Mus musculus OX=10090 GN=Lmnb1 PE=1 SV=3	46	25	127	22	97.11	360.4	25	66.7	8.05323e+06	9.34315e+06	9.01343e+06	1.05615e+07	6.83353e+06	1.47386e+07	6.53328e+06	8.92681e+06	1.45192e+07	1.38171e+07	1.29062e+07	21	21	23	24	20	23	19	21	21	21	21	21	21	23	24	20	23	19	21	21	21	21
P18760	12631	Cfl1	FALSE	Cofilin-1 OS=Mus musculus OX=10090 GN=Cfl1 PE=1 SV=3	73	15	127	14	55.172	422.27	15	18.5	2.11131e+07	2.51253e+07	2.37456e+07	2.98828e+07	2.34344e+07	4.36806e+07	2.18527e+07	2.43302e+07	3.63098e+07	4.21352e+07	3.37825e+07	13	13	13	15	14	14	14	15	15	15	14	13	13	13	15	14	14	14	15	15	15	14
Q91XV3	70350	Basp1	FALSE	Brain acid soluble protein 1 OS=Mus musculus OX=10090 GN=Basp1 PE=1 SV=3	89	17	127	17	78.84	417.47	17	22.1	6.40888e+06	4.07787e+06	5.11979e+06	7.18733e+06	9.25613e+06	9.18417e+06	1.06671e+07	7.84075e+06	2.21116e+07	9.0874e+06	2.13087e+07	12	10	12	14	12	14	15	14	15	15	16	12	10	12	14	12	14	15	14	15	15	16
P52196	22117	Tst	TRUE	Thiosulfate sulfurtransferase OS=Mus musculus OX=10090 GN=Tst PE=1 SV=3	52	14	126	13	49.4	309.92	14	33.4	2.14525e+06	3.47813e+07	3.88423e+07	2.07449e+07	4.34264e+06	7.10912e+07	1.19665e+07	4.54007e+07	2.91324e+07	1.13515e+08	2.14128e+07	6	14	14	13	8	14	11	14	12	14	12	6	14	14	13	8	14	11	14	12	14	12
Q62446	30795	Fkbp3	FALSE	Peptidyl-prolyl cis-trans isomerase FKBP3 OS=Mus musculus OX=10090 GN=Fkbp3 PE=1 SV=2	61	14	126	14	65.91	351.69	14	25.1	3.13785e+07	3.89087e+07	3.68064e+07	3.54772e+07	4.61621e+07	2.69047e+07	2.39635e+07	3.5772e+07	6.08987e+07	4.01883e+07	4.70047e+07	12	12	12	12	12	12	13	12	14	13	13	12	12	12	12	12	12	13	12	14	13	13
Q91Y97	230163	Aldob	FALSE	Fructose-bisphosphate aldolase B OS=Mus musculus OX=10090 GN=Aldob PE=1 SV=3	44	17	126	17	66.726	342.19	17	39.5	3.92801e+07	4.64978e+07	5.1451e+07	4.78201e+07	7.88259e+07	3.26999e+07	3.1688e+07	4.63733e+07	4.10145e+07	3.86808e+07	3.77953e+07	15	17	15	16	15	16	13	16	14	17	14	15	17	15	16	15	16	13	16	14	17	14
Q8CJF7	226747	Ahctf1	FALSE	Protein ELYS OS=Mus musculus OX=10090 GN=Ahctf1 PE=1 SV=1	17	25	126	25	98.585	380.58	25	247.5	9.87093e+06	8.94863e+06	7.75171e+06	7.93855e+06	8.98908e+06	4.88413e+06	5.27773e+06	5.91484e+06	7.3129e+06	7.22409e+06	1.02001e+07	22	21	22	21	22	19	19	18	16	19	21	22	21	22	21	22	19	19	18	16	19	21
Q59J78	75597	Ndufaf2	TRUE	NADH dehydrogenase [ubiquinone] 1 alpha subcomplex assembly factor 2 OS=Mus musculus OX=10090 GN=Ndufaf2 PE=1 SV=1	77	14	126	14	58.413	294.39	14	19.6	1.22235e+07	1.61202e+07	1.94688e+07	1.56245e+07	1.56505e+07	4.21213e+07	3.09923e+07	3.95272e+07	5.96396e+07	3.82587e+07	3.36707e+07	13	11	13	13	12	13	14	14	14	14	13	13	11	13	13	12	13	14	14	14	14	13
O70591	18637	Pfdn2	FALSE	Prefoldin subunit 2 OS=Mus musculus OX=10090 GN=Pfdn2 PE=1 SV=2	56	9	126	9	55.592	374.44	9	16.5	2.58615e+07	2.49893e+07	2.58963e+07	2.83848e+07	3.82701e+07	2.49825e+07	3.22481e+07	3.46115e+07	7.10955e+07	3.99187e+07	5.90014e+07	8	8	8	8	8	8	8	8	9	9	9	8	8	8	8	8	8	8	8	9	9	9
Q61508	13601	Ecm1	FALSE	Extracellular matrix protein 1 OS=Mus musculus OX=10090 GN=Ecm1 PE=1 SV=2	42	17	126	17	71.498	347.56	17	62.8	8.97152e+06	1.36785e+07	1.42497e+07	1.15044e+07	1.00967e+07	1.79903e+07	1.33077e+07	1.39861e+07	2.98003e+07	2.43758e+07	1.83341e+07	12	15	15	14	13	14	15	15	16	16	15	12	15	15	14	13	14	15	15	16	16	15
O35387	23897	Hax1	FALSE	HCLS1-associated protein X-1 OS=Mus musculus OX=10090 GN=Hax1 PE=1 SV=1	80	18	126	18	97.07	357.12	18	31.6	7.03195e+06	1.03928e+07	1.12409e+07	9.36009e+06	9.65873e+06	3.51577e+07	3.24532e+07	4.60385e+07	6.72827e+07	5.7921e+07	3.14549e+07	12	12	13	13	13	15	14	15	16	16	13	12	12	13	13	13	15	14	15	16	16	13
O35691	18949	Pnn	FALSE	Pinin OS=Mus musculus OX=10090 GN=Pnn PE=1 SV=4	28	19	125	19	70.545	295.29	19	82.4	1.69007e+07	1.52148e+07	1.46194e+07	1.23099e+07	1.92484e+07	1.54328e+07	9.43296e+06	1.1717e+07	1.86913e+07	1.53578e+07	1.81207e+07	19	18	18	18	18	18	18	18	18	17	18	19	18	18	18	18	18	18	18	18	17	18
Q8R409	192231	Hexim1	FALSE	Protein HEXIM1 OS=Mus musculus OX=10090 GN=Hexim1 PE=1 SV=1	48	13	124	13	72.742	355.08	13	40.2	3.96083e+07	2.35006e+07	2.83876e+07	3.22134e+07	4.51267e+07	1.43854e+07	1.59298e+07	1.75938e+07	2.89555e+07	1.81838e+07	3.68414e+07	11	10	11	12	12	9	12	11	12	11	11	11	10	11	12	12	9	12	11	12	11	11
P83917	12412	Cbx1	FALSE	Chromobox protein homolog 1 OS=Mus musculus OX=10090 GN=Cbx1 PE=1 SV=1	66	11	124	10	52.166	371.64	11	21.4	1.13451e+07	1.77687e+07	1.76665e+07	2.15705e+07	1.49902e+07	2.38922e+07	1.71194e+07	1.8937e+07	3.88492e+07	2.91795e+07	3.04382e+07	8	8	7	11	8	10	8	11	11	9	10	8	8	7	11	8	10	8	11	11	9	10
Q9DAW9	71994	Cnn3	FALSE	Calponin-3 OS=Mus musculus OX=10090 GN=Cnn3 PE=1 SV=1	47	12	124	12	70.023	348.9	12	36.4	1.48e+07	1.85961e+07	1.82706e+07	1.71836e+07	2.08108e+07	2.14792e+07	1.6971e+07	2.23703e+07	3.92213e+07	2.96329e+07	3.70024e+07	9	11	10	10	9	11	8	11	12	12	10	9	11	10	10	9	11	8	11	12	12	10
P55264	11534	Adk	FALSE	Adenosine kinase OS=Mus musculus OX=10090 GN=Adk PE=1 SV=2	46	17	124	17	82.404	361.87	17	40.1	1.08203e+07	1.71092e+07	2.00059e+07	1.86173e+07	2.49517e+07	1.64628e+07	15133404	2.95371e+07	2.12811e+07	2.49858e+07	2.55282e+07	14	17	16	16	13	15	15	16	15	16	16	14	17	16	16	13	15	15	16	15	16	16
Q99NB9	81898	Sf3b1	FALSE	Splicing factor 3B subunit 1 OS=Mus musculus OX=10090 GN=Sf3b1 PE=1 SV=1	21	20	124	20	94.28	372.44	20	145.7	1.16576e+07	7.1851e+06	5.58773e+06	7.98608e+06	1.08422e+07	4.03132e+06	6.28567e+06	7.24997e+06	1.02551e+07	8.63548e+06	1.31128e+07	20	17	17	18	19	14	18	16	20	16	20	20	17	17	18	19	14	18	16	20	16	20
P53996	12785	Cnbp	FALSE	CCHC-type zinc finger nucleic acid binding protein OS=Mus musculus OX=10090 GN=Cnbp PE=1 SV=2	66	12	124	12	55.43	293.79	12	19.6	2.40573e+07	3.35512e+07	2.36809e+07	4.55019e+07	5.30982e+07	2.80496e+07	2.29662e+07	3.32235e+07	5.87182e+07	2.53285e+07	4.57132e+07	10	11	10	12	12	10	10	12	12	9	12	10	11	10	12	12	10	10	12	12	9	12
Q6IRU5	74325	Cltb	FALSE	Clathrin light chain B OS=Mus musculus OX=10090 GN=Cltb PE=1 SV=1	24	10	124	10	35.29	291.39	10	25.2	1.61708e+08	1.10774e+08	1.14168e+08	1.30192e+08	1.86755e+08	7.97571e+07	1.09299e+08	1.06448e+08	1.83184e+08	1.20412e+08	1.89037e+08	10	10	10	10	10	10	10	10	10	10	10	10	10	10	10	10	10	10	10	10	10	10
Q78ZA7	17955	Nap1l4	FALSE	Nucleosome assembly protein 1-like 4 OS=Mus musculus OX=10090 GN=Nap1l4 PE=1 SV=1	58	14	124	13	79.836	386.83	14	42.7	9.14722e+06	2.85873e+07	2.82246e+07	2.18431e+07	1.17926e+07	4.07798e+07	2.32406e+07	3.17697e+07	4.69778e+07	3.97357e+07	3.53164e+07	9	14	13	13	11	14	13	13	13	13	13	9	14	13	13	11	14	13	13	13	13	13
Q64213	22668	Sf1	FALSE	Splicing factor 1 OS=Mus musculus OX=10090 GN=Sf1 PE=1 SV=6	27	13	123	13	89.023	375.37	13	70.4	2.02651e+07	2.09066e+07	2.07917e+07	1.5541e+07	2.36996e+07	1.43312e+07	1.3796e+07	1.95312e+07	3.14833e+07	1.98567e+07	2.71456e+07	12	13	12	11	12	11	13	12	12	11	13	12	13	12	11	12	11	13	12	12	11	13
P48036	11747	Anxa5	FALSE	Annexin A5 OS=Mus musculus OX=10090 GN=Anxa5 PE=1 SV=1	68	19	122	19	77.173	317.67	19	35.7	9.21657e+06	2.66295e+07	2.33615e+07	2.0019e+07	1.81855e+07	9.22178e+07	2.6599e+07	3.11863e+07	5.80739e+07	9.46249e+07	4.05597e+07	10	16	16	13	9	17	12	16	17	18	15	10	16	16	13	9	17	12	16	17	18	15
Q7TNV0	110052	Dek	FALSE	Protein DEK OS=Mus musculus OX=10090 GN=Dek PE=1 SV=1	32	16	122	16	67.26	336.87	16	43.1	1.88684e+07	24242067	2.53482e+07	2.10371e+07	3.12332e+07	3.1407e+07	1.4642e+07	2.1433e+07	47878278	3.20914e+07	4.20454e+07	15	14	14	15	14	15	15	13	16	15	15	15	14	14	15	14	15	15	13	16	15	15
Q8K4Z5	67465	Sf3a1	FALSE	Splicing factor 3A subunit 1 OS=Mus musculus OX=10090 GN=Sf3a1 PE=1 SV=1	30	20	122	20	76.815	363.88	20	88.5	5.73172e+06	1.10625e+07	1.1605e+07	9.56649e+06	6.87538e+06	9.13938e+06	4.9951e+06	8.34663e+06	1.06863e+07	1.20719e+07	1.00252e+07	17	20	19	19	16	19	16	18	19	20	18	17	20	19	19	16	19	16	18	19	20	18
Q8BIQ5	108062	Cstf2	FALSE	Cleavage stimulation factor subunit 2 OS=Mus musculus OX=10090 GN=Cstf2 PE=1 SV=2	38	14	122	14	72.143	361.44	14	61.3	1.26033e+07	1.54513e+07	1.56899e+07	2.35702e+07	1.46178e+07	1.34145e+07	1.23108e+07	1.47689e+07	3.08127e+07	1.75425e+07	3.13677e+07	12	14	12	14	13	11	12	13	13	14	14	12	14	12	14	13	11	12	13	13	14	14
O88746	21968	Tom1	FALSE	Target of Myb protein 1 OS=Mus musculus OX=10090 GN=Tom1 PE=1 SV=1	64	20	122	20	99.735	388.16	20	54.3	8.09753e+06	1.12759e+07	1.06303e+07	9.44643e+06	5.94706e+06	5.61778e+07	1.75042e+07	2.13923e+07	2.63286e+07	3.36028e+07	2.16412e+07	12	17	17	16	9	18	16	18	19	19	19	12	17	17	16	9	18	16	18	19	19	19
Q80UU9	70804	Pgrmc2	FALSE	Membrane-associated progesterone receptor component 2 OS=Mus musculus OX=10090 GN=Pgrmc2 PE=1 SV=2	67	14	122	13	59.642	351.08	14	23.3	2.13908e+07	1.96056e+07	2.43143e+07	2.20404e+07	3.34637e+07	2.01399e+07	2.37465e+07	2.07726e+07	3.35461e+07	2.22732e+07	3.95952e+07	13	13	14	13	14	13	13	13	11	13	13	13	13	14	13	14	13	13	13	11	13	13
Q9ER00	100226	Stx12	FALSE	Syntaxin-12 OS=Mus musculus OX=10090 GN=Stx12 PE=1 SV=1	55	11	122	11	61.525	353.47	11	31.2	2.34426e+07	2.58647e+07	2.83031e+07	2.33187e+07	2.63402e+07	2.99364e+07	2.72506e+07	2.81531e+07	4.13166e+07	3.40245e+07	3.43598e+07	11	11	11	11	11	11	11	11	11	11	11	11	11	11	11	11	11	11	11	11	11	11
Q9D6R2	67834	Idh3a	TRUE	Isocitrate dehydrogenase [NAD] subunit alpha, mitochondrial OS=Mus musculus OX=10090 GN=Idh3a PE=1 SV=1	44	13	122	13	80.371	346.03	13	39.6	2.75337e+06	1.56314e+07	1.78509e+07	7.11115e+06	1.53522e+06	7.65528e+07	1.00466e+07	3.6806e+07	3.13511e+07	1.01744e+08	1.70039e+07	7	12	12	11	7	12	11	12	12	12	12	7	12	12	11	7	12	11	12	12	12	12
Q9JJG0	57752	Tacc2	FALSE	Transforming acidic coiled-coil-containing protein 2 OS=Mus musculus OX=10090 GN=Tacc2 PE=1 SV=2	28	22	121	20	88.235	348.92	22	124.1	6.41e+06	4.43314e+06	4.81339e+06	5.02488e+06	7.24432e+06	1.02444e+07	1.35721e+07	1.03979e+07	2.66401e+07	1.72926e+07	1.36899e+07	18	16	17	18	19	18	21	20	21	22	20	18	16	17	18	19	18	21	20	21	22	20
Q3UMU9	15193	Hdgfl2	FALSE	Hepatoma-derived growth factor-related protein 2 OS=Mus musculus OX=10090 GN=Hdgfl2 PE=1 SV=1	26	19	121	16	79.119	316.37	19	74.2	7.17114e+06	8.33827e+06	1.08977e+07	8.98807e+06	1.24068e+07	1.22319e+07	4.11893e+06	8.17211e+06	1.78499e+07	1.22026e+07	1.57233e+07	18	19	19	19	18	17	16	19	19	18	18	18	19	19	19	18	17	16	19	19	18	18
Q9R257	15199	Hebp1	TRUE	Heme-binding protein 1 OS=Mus musculus OX=10090 GN=Hebp1 PE=1 SV=2	85	13	120	13	64.098	387.35	13	21.1	1.23512e+07	4.06763e+07	4.3994e+07	2.76288e+07	2.14326e+07	4.24465e+07	3.463e+07	7.29096e+07	69339751	8.0166e+07	5.35241e+07	10	11	12	12	10	12	12	12	13	12	12	10	11	12	12	10	12	12	12	13	12	12
A2AQ25	208618	Etl4	FALSE	Sickle tail protein OS=Mus musculus OX=10090 GN=Skt PE=1 SV=1	15	18	120	18	89.277	361.23	18	212.9	7.43078e+06	6.91073e+06	5.78319e+06	5.38725e+06	8.21322e+06	4.26396e+06	6.0575e+06	4.60045e+06	7.60124e+06	4.03087e+06	9.42966e+06	16	15	14	15	17	15	17	15	14	13	16	16	15	14	15	17	15	17	15	14	13	16
P07759	20714	Serpina3k	FALSE	Serine protease inhibitor A3K OS=Mus musculus OX=10090 GN=Serpina3k PE=1 SV=2	36	15	120	8	85.435	359.74	15	46.9	2.50787e+07	7.99676e+06	5.91986e+06	1.09102e+07	2.4219e+07	8.69471e+06	5.63338e+06	9.7787e+06	2.47165e+06	1.70933e+06	6.0939e+06	14	11	11	12	14	11	13	12	11	9	11	14	11	11	12	14	11	13	12	11	9	11
P19973	16985	Lsp1	FALSE	Lymphocyte-specific protein 1 OS=Mus musculus OX=10090 GN=Lsp1 PE=1 SV=2	65	16	120	16	65.77	341.84	16	36.7	1.62926e+07	1.39513e+07	1.30485e+07	1.86153e+07	1.47773e+07	2.07148e+07	1.83381e+07	1.73224e+07	4.22601e+07	2.71505e+07	4.17799e+07	14	13	13	14	14	14	15	13	15	15	16	14	13	13	14	14	14	15	13	15	15	16
Q6P9Q6	338355	Fkbp15	FALSE	FK506-binding protein 15 OS=Mus musculus OX=10090 GN=Fkbp15 PE=1 SV=2	21	19	120	19	83.289	345.84	19	132.9	9.32308e+06	1.02699e+07	9.39808e+06	8.71826e+06	8.71597e+06	7.29031e+06	7.82394e+06	6.94947e+06	1.10675e+07	1.03797e+07	1.64996e+07	16	18	18	17	16	17	16	15	15	18	18	16	18	18	17	16	17	16	15	15	18	18
O08583	21681	Alyref	FALSE	THO complex subunit 4 OS=Mus musculus OX=10090 GN=Alyref PE=1 SV=3	50	10	120	5	61.312	355.32	10	26.9	2.69798e+07	3.23042e+07	2.37513e+07	3.56645e+07	2.4597e+07	2.14599e+07	2.69904e+07	2.95908e+07	5.48132e+07	3.63632e+07	3.94995e+07	10	10	9	10	10	9	10	9	9	9	9	10	10	9	10	10	9	10	9	9	9	9
Q6Y7W8	227331	Gigyf2	FALSE	GRB10-interacting GYF protein 2 OS=Mus musculus OX=10090 GN=Gigyf2 PE=1 SV=2	21	21	119	21	73.743	314.57	21	149.1	5.78694e+06	7.95275e+06	7.97824e+06	6.65503e+06	5.56275e+06	6.49143e+06	3.63339e+06	5.57606e+06	6.37485e+06	8.1377e+06	7.469e+06	20	19	21	20	17	19	15	20	19	21	19	20	19	21	20	17	19	15	20	19	21	19
P62858	54127	Rps28	FALSE	40S ribosomal protein S28 OS=Mus musculus OX=10090 GN=Rps28 PE=1 SV=1	52	4	119	4	18.093	291.93	4	7.8	2.62577e+08	1.73869e+08	1.64454e+08	1.83766e+08	3.24174e+08	1.18454e+08	1.75967e+08	1.66211e+08	2.60797e+08	1.65673e+08	2.64099e+08	4	4	3	4	3	3	4	4	4	3	4	4	4	3	4	3	3	4	4	4	3	4
Q9CPY7	66988	Lap3	TRUE	Cytosol aminopeptidase OS=Mus musculus OX=10090 GN=Lap3 PE=1 SV=3	38	17	118	17	74.54	314.8	17	56.1	1.19043e+07	1.86714e+07	1.9202e+07	1.58999e+07	2.02586e+07	2.04542e+07	1.70033e+07	2.66647e+07	2.499e+07	2.92409e+07	2.19025e+07	12	15	17	15	12	14	15	14	15	17	15	12	15	17	15	12	14	15	14	15	17	15
P09813	11807	Apoa2	FALSE	Apolipoprotein A-II OS=Mus musculus OX=10090 GN=Apoa2 PE=1 SV=2	78	9	118	9	68.3	396.36	9	11.3	1.2066e+08	8.78377e+07	7.85674e+07	1.42757e+08	2.269e+08	6.08003e+07	4.0339e+07	8.00077e+07	3.70096e+07	3.8781e+07	1.09718e+08	9	7	9	9	9	4	7	8	5	7	8	9	7	9	9	9	4	7	8	5	7	8
Q9Z2Q5	18100	Mrpl40	TRUE	39S ribosomal protein L40, mitochondrial OS=Mus musculus OX=10090 GN=Mrpl40 PE=1 SV=2	50	14	118	14	69.76	347.2	14	24.3	2.00736e+07	1.47777e+07	1.42279e+07	1.61431e+07	2.45117e+07	3.14102e+07	5.84408e+07	6.16915e+07	8.44382e+07	6.15717e+07	4.67072e+07	12	12	12	10	12	12	14	13	14	12	12	12	12	12	10	12	12	14	13	14	12	12
Q3UMT1	232807	Ppp1r12c	FALSE	Protein phosphatase 1 regulatory subunit 12C OS=Mus musculus OX=10090 GN=Ppp1r12c PE=1 SV=1	35	20	117	20	85.974	347.05	20	84.6	6.91267e+06	9.26551e+06	8.63084e+06	7.92878e+06	6.88224e+06	7.65367e+06	6.16176e+06	6.71322e+06	8.83614e+06	7.33484e+06	1.06946e+07	18	19	19	19	18	17	19	19	16	16	18	18	19	19	19	18	17	19	19	16	16	18
P70349	15254	Hint1	TRUE	Adenosine 5'-monophosphoramidase HINT1 OS=Mus musculus OX=10090 GN=Hint1 PE=1 SV=3	79	10	117	10	78.231	400.97	10	13.8	2.07071e+07	4.00974e+07	3.84801e+07	4.17335e+07	3.63407e+07	6.18459e+07	3.43223e+07	5.22172e+07	8.70207e+07	8.65935e+07	5.63433e+07	8	9	8	9	8	8	9	8	10	10	9	8	9	8	9	8	8	9	8	10	10	9
Q91YI0	109900	Asl	FALSE	Argininosuccinate lyase OS=Mus musculus OX=10090 GN=Asl PE=1 SV=1	37	13	117	13	53.301	324.77	13	51.7	2.13734e+07	32536675	3.58179e+07	3.36114e+07	3.9305e+07	1.63555e+07	1.60899e+07	2.86871e+07	2.57211e+07	1.78943e+07	3.11868e+07	10	12	13	11	11	10	9	10	9	11	11	10	12	13	11	11	10	9	10	9	11	11
P62869	67673	Elob	FALSE	Elongin-B OS=Mus musculus OX=10090 GN=Elob PE=1 SV=1	67	8	117	8	34.58	300.1	8	13.2	8.04063e+06	1.84989e+07	2.05085e+07	1.80411e+07	1.26431e+07	2.6388e+07	1.3123e+07	1.76742e+07	3.04499e+07	2.569e+07	2.70941e+07	7	7	7	7	7	7	7	7	8	8	8	7	7	7	7	7	7	7	7	8	8	8
Q8WTY4	109006	Ciapin1	FALSE	Anamorsin OS=Mus musculus OX=10090 GN=Ciapin1 PE=1 SV=1	66	14	117	14	62.297	373.65	14	33.4	7.78806e+06	1.3585e+07	1.13806e+07	1.1158e+07	9.45672e+06	2.48474e+07	1.89543e+07	1.79947e+07	3.08189e+07	2.95873e+07	1.88273e+07	12	13	12	12	13	13	12	11	12	13	12	12	13	12	12	13	13	12	11	12	13	12
P48758	12408	Cbr1	FALSE	Carbonyl reductase [NADPH] 1 OS=Mus musculus OX=10090 GN=Cbr1 PE=1 SV=3	73	17	117	16	71.25	330.95	17	30.6	1872419	3.33304e+07	4.49409e+07	2.2315e+07	4.07004e+06	4.354e+07	6.13529e+06	1.92868e+07	3.12332e+07	8.1091e+07	24138790	7	16	16	15	10	17	12	15	16	16	15	7	16	16	15	10	17	12	15	16	16	15
P68254	22630	Ywhaq	FALSE	14-3-3 protein theta OS=Mus musculus OX=10090 GN=Ywhaq PE=1 SV=1	56	17	116	11	73.691	314.97	17	27.8	840869	1.10298e+07	1.12166e+07	4.34476e+06	2.12472e+06	2.99578e+07	1.31745e+06	5.25909e+06	5.79245e+06	1.93916e+07	5.89453e+06	5	15	16	12	6	17	7	14	13	17	12	5	15	16	12	6	17	7	14	13	17	12
Q9DCS9	68342	Ndufb10	TRUE	NADH dehydrogenase [ubiquinone] 1 beta subcomplex subunit 10 OS=Mus musculus OX=10090 GN=Ndufb10 PE=1 SV=3	63	11	116	11	60.633	357.51	11	21	3.72146e+07	4.70589e+07	4.21691e+07	4.47873e+07	4.68466e+07	1.04409e+08	4.41233e+07	1.19829e+08	9.83002e+07	9.64845e+07	7.04544e+07	7	8	8	9	8	10	10	11	10	10	10	7	8	8	9	8	10	10	11	10	10	10
Q9Z1Z0	56041	Uso1	FALSE	General vesicular transport factor p115 OS=Mus musculus OX=10090 GN=Uso1 PE=1 SV=2	23	20	116	20	77.807	343.73	20	106.9	2.2516e+07	1.47942e+07	1.14799e+07	1.50054e+07	1.97699e+07	8.54032e+06	9.30228e+06	9.72523e+06	1.04632e+07	1.11894e+07	1.91548e+07	19	17	16	17	19	14	16	15	15	15	17	19	17	16	17	19	14	16	15	15	15	17
Q9CQA3	67680	Sdhb	TRUE	Succinate dehydrogenase [ubiquinone] iron-sulfur subunit, mitochondrial OS=Mus musculus OX=10090 GN=Sdhb PE=1 SV=1	44	14	115	14	65.573	274.43	14	31.8	3.04055e+06	3.58351e+07	4.36303e+07	1.98331e+07	7.33696e+06	1.01901e+08	2.50367e+07	9.20733e+07	6.10966e+07	1.40352e+08	3.52171e+07	9	14	14	14	13	14	13	14	14	14	13	9	14	14	14	13	14	13	14	14	14	13
Q60902	13859	Eps15l1	FALSE	Epidermal growth factor receptor substrate 15-like 1 OS=Mus musculus OX=10090 GN=Eps15l1 PE=1 SV=3	35	22	115	22	79.148	319.89	22	99.2	8.65441e+06	1.16144e+07	1.15398e+07	1.14837e+07	1.14273e+07	1.82372e+07	9.44615e+06	1.10454e+07	1.67064e+07	2.05655e+07	1.70041e+07	20	21	19	19	20	16	16	17	16	17	20	20	21	19	19	20	16	16	17	16	17	20
P97807	14194	Fh1	TRUE	Fumarate hydratase, mitochondrial OS=Mus musculus OX=10090 GN=Fh PE=1 SV=3	37	13	115	13	79.031	320.35	13	54.3	8.28465e+06	1.17473e+07	1.26565e+07	1.06246e+07	1.80272e+07	2.87761e+07	2.25742e+07	3.545e+07	3.74923e+07	4.38256e+07	2.42888e+07	10	13	13	10	11	13	11	13	12	13	11	10	13	13	10	11	13	11	13	12	13	11
P33622	11814	Apoc3	FALSE	Apolipoprotein C-III OS=Mus musculus OX=10090 GN=Apoc3 PE=1 SV=2	51	4	115	4	20.54	333.35	4	11	4.46684e+07	4.36914e+07	4.38216e+07	7.94358e+07	7.75494e+07	4.38627e+07	3.51633e+07	5.40639e+07	3.56936e+07	4.42056e+07	6.12304e+07	4	4	4	4	4	4	4	4	4	4	4	4	4	4	4	4	4	4	4	4	4	4
Q9JMG1	59022	Edf1	FALSE	Endothelial differentiation-related factor 1 OS=Mus musculus OX=10090 GN=Edf1 PE=1 SV=1	69	15	115	15	51.34	304.11	15	16.4	5.16329e+07	2.80328e+07	2.18011e+07	3.7323e+07	6.80124e+07	1.34316e+07	2.29415e+07	2.49754e+07	4.99435e+07	1.88858e+07	4.66163e+07	12	11	11	12	12	12	11	12	15	12	12	12	11	11	12	12	12	11	12	15	12	12
Q8VCT4	104158	Ces1d	FALSE	Carboxylesterase 1D OS=Mus musculus OX=10090 GN=Ces1d PE=1 SV=1	32	15	114	13	70.531	312.16	15	61.7	1.35842e+07	2.37951e+07	2.6835e+07	2.87793e+07	2.59591e+07	8.11168e+06	7.77702e+06	1.17318e+07	1.32356e+07	1.33364e+07	2.97685e+07	12	13	14	12	13	9	9	10	11	12	13	12	13	14	12	13	9	9	10	11	12	13
O08800	20725	Serpinb8	FALSE	Serpin B8 OS=Mus musculus OX=10090 GN=Serpinb8 PE=1 SV=2	48	14	114	14	63.871	301.66	14	42.1	6.43914e+06	1.33851e+07	1.50542e+07	1.83135e+07	1.17241e+07	1.31154e+07	1.22626e+07	1.05317e+07	2.90649e+07	1.9406e+07	4.49485e+07	12	12	12	13	12	13	13	11	14	13	13	12	12	12	13	12	13	13	11	14	13	13
Q5EBG8	230696	AU022252	FALSE	Uncharacterized protein C1orf50 homolog OS=Mus musculus OX=10090 PE=1 SV=1	80	11	114	11	53.522	341.76	11	21.8	1.78382e+07	3.62119e+07	4.53318e+07	4.062e+07	2.9194e+07	2.33568e+07	1.88373e+07	2.45979e+07	3.43637e+07	3.05404e+07	5.15622e+07	11	11	11	11	11	11	11	11	11	11	11	11	11	11	11	11	11	11	11	11	11	11
Q9CQ69	22272	Uqcrq	TRUE	Cytochrome b-c1 complex subunit 8 OS=Mus musculus OX=10090 GN=Uqcrq PE=1 SV=3	76	8	113	8	40.77	240.24	8	9.8	2.69821e+07	2.53613e+07	2.37301e+07	2.14876e+07	4.24175e+07	6.4644e+07	1.02629e+08	9.77871e+07	7.41868e+07	1.01189e+08	8.66925e+07	8	8	8	7	7	7	8	8	8	7	8	8	8	8	7	7	7	8	8	8	7	8
Q6A068	71702	Cdc5l	FALSE	Cell division cycle 5-like protein OS=Mus musculus OX=10090 GN=Cdc5l PE=1 SV=2	43	22	113	22	88.05	322.2	22	92.1	9.16911e+06	8.83546e+06	7.60083e+06	9.20934e+06	9.32501e+06	8.81883e+06	6.92997e+06	7.36935e+06	1.1194e+07	1.13668e+07	1.38626e+07	20	19	18	16	19	17	16	17	18	17	18	20	19	18	16	19	17	16	17	18	17	18
Q8VC30	225913	Tkfc	FALSE	Triokinase/FMN cyclase OS=Mus musculus OX=10090 GN=Tkfc PE=1 SV=1	33	12	112	12	72.303	349.63	12	59.7	1.61967e+07	3.36908e+07	2.88426e+07	2.66482e+07	3.50984e+07	2.08512e+07	1.30437e+07	1.95247e+07	1.25059e+07	1.40979e+07	2.96959e+07	9	12	12	11	10	10	8	11	8	8	12	9	12	12	11	10	10	8	11	8	8	12
Q9JHL1	65962	Slc9a3r2	FALSE	Na(+)/H(+) exchange regulatory cofactor NHE-RF2 OS=Mus musculus OX=10090 GN=Slc9a3r2 PE=1 SV=2	52	15	112	15	72.591	403.41	15	37.4	2.31604e+07	2.0498e+07	1.92956e+07	2.1497e+07	2.63279e+07	2.08085e+07	1.72367e+07	2.16339e+07	2.90512e+07	1.811e+07	3.07264e+07	14	14	14	15	14	13	15	15	14	14	13	14	14	14	15	14	13	15	15	14	14	13
P26041	17698	Msn	FALSE	Moesin OS=Mus musculus OX=10090 GN=Msn PE=1 SV=3	32	20	112	15	79.354	258.44	20	67.7	1.30538e+07	1.02482e+07	8.92192e+06	1.25724e+07	1.41867e+07	1.33893e+07	8.19848e+06	7.8375e+06	1.47152e+07	1.04657e+07	1.65289e+07	18	15	16	17	17	18	15	16	17	16	19	18	15	16	17	17	18	15	16	17	16	19
Q9QY76	56491	Vapb	FALSE	Vesicle-associated membrane protein-associated protein B OS=Mus musculus OX=10090 GN=Vapb PE=1 SV=3	51	11	112	10	73.298	284.48	11	26.9	4.38745e+07	4.36156e+07	4.84933e+07	3.58057e+07	4.684e+07	5.0237e+07	3.49606e+07	4.00557e+07	3.93433e+07	4.46994e+07	5.10267e+07	11	11	11	11	11	11	10	11	10	11	11	11	11	11	11	11	11	10	11	10	11	11
Q80UG5	53860	Septin9	FALSE	Septin-9 OS=Mus musculus OX=10090 GN=Septin9 PE=1 SV=1	26	14	112	14	46.025	292.85	14	65.5	2.42845e+07	1.87751e+07	1.5105e+07	1.91639e+07	2.18827e+07	1.32998e+07	1.81371e+07	1.89078e+07	2.22822e+07	1.80477e+07	2.93024e+07	13	14	13	13	13	13	12	13	13	13	13	13	14	13	13	13	13	12	13	13	13	13
P46414	12576	Cdkn1b	FALSE	Cyclin-dependent kinase inhibitor 1B OS=Mus musculus OX=10090 GN=Cdkn1b PE=1 SV=2	75	14	112	14	73.727	322.29	14	22.2	1.37619e+07	1.21827e+07	1.01763e+07	1.27706e+07	1.79965e+07	1.00809e+07	1.43184e+07	1.51998e+07	2.35601e+07	1.35833e+07	2.04515e+07	14	12	11	14	13	11	12	14	13	12	13	14	12	11	14	13	11	12	14	13	12	13
Q91WG2	70314	Rabep2	FALSE	Rab GTPase-binding effector protein 2 OS=Mus musculus OX=10090 GN=Rabep2 PE=1 SV=3	44	19	112	19	68.872	292.77	19	62.1	6.55433e+06	7.23792e+06	8.64279e+06	7.68654e+06	6.51903e+06	9.2162e+06	7.81169e+06	6.72125e+06	1.28163e+07	1.03604e+07	1.33783e+07	18	16	18	17	16	19	17	18	17	16	18	18	16	18	17	16	19	17	18	17	16	18
Q62523	22793	Zyx	FALSE	Zyxin OS=Mus musculus OX=10090 GN=Zyx PE=1 SV=2	41	15	111	15	65.789	349.46	15	60.5	1.38369e+07	1.45536e+07	1.46186e+07	1.64363e+07	1.60113e+07	1.80774e+07	2.10763e+07	2.20792e+07	3.83579e+07	2.3204e+07	3.06625e+07	13	15	14	14	12	14	14	14	15	13	14	13	15	14	14	12	14	14	14	15	13	14
Q9JMH9	360013	Myo18a	FALSE	Unconventional myosin-XVIIIa OS=Mus musculus OX=10090 GN=Myo18a PE=1 SV=2	11	19	111	19	72.793	293.18	19	232.6	9.86073e+06	7.62079e+06	6.9536e+06	7.74168e+06	8.78232e+06	5.00323e+06	6.69392e+06	6.80509e+06	9.93061e+06	8.05867e+06	1.12781e+07	18	16	16	17	16	14	17	15	16	16	16	18	16	16	17	16	14	17	15	16	16	16
Q9R1K9	26370	Cetn2	FALSE	Centrin-2 OS=Mus musculus OX=10090 GN=Cetn2 PE=1 SV=1	73	10	110	10	72.328	332.06	10	19.8	1.32461e+07	9.93675e+06	9.57026e+06	1.21003e+07	1.44647e+07	8.86118e+06	1.09273e+07	1.0858e+07	2.18343e+07	1.25522e+07	2.11637e+07	9	8	9	9	9	9	10	9	10	9	9	9	8	9	9	9	9	10	9	10	9	9
Q3UZA1	226594	Rcsd1	FALSE	CapZ-interacting protein OS=Mus musculus OX=10090 GN=Rcsd1 PE=1 SV=1	54	15	110	15	78.03	307.18	15	44.1	9.62024e+06	9.44304e+06	9.72656e+06	1.05118e+07	1.05042e+07	9.18127e+06	1.12063e+07	1.03916e+07	2.05665e+07	1.23972e+07	2.03815e+07	13	13	13	14	15	15	14	13	15	15	15	13	13	13	14	15	15	14	13	15	15	15
Q99LX0	57320	Park7	TRUE	Parkinson disease protein 7 homolog OS=Mus musculus OX=10090 GN=Park7 PE=1 SV=1	79	12	110	12	68.94	356.09	12	20	1.21647e+07	2.80852e+07	2.97605e+07	2.23457e+07	1.39313e+07	3.73294e+07	1.53628e+07	2.84014e+07	2.13589e+07	4.68702e+07	2.29817e+07	10	11	10	11	10	12	10	10	10	10	10	10	11	10	11	10	12	10	10	10	10	10
Q9D824	66899	Fip1l1	FALSE	Pre-mRNA 3'-end-processing factor FIP1 OS=Mus musculus OX=10090 GN=Fip1l1 PE=1 SV=1	40	14	110	14	63.246	345.7	14	64.9	1.58482e+07	1.22779e+07	1.18112e+07	1.19378e+07	1.87746e+07	8.67353e+06	1.16579e+07	1.25555e+07	2.7791e+07	1.54836e+07	2.17273e+07	13	12	12	11	13	12	13	12	14	12	13	13	12	12	11	13	12	13	12	14	12	13
P62270	20084	Rps18	FALSE	40S ribosomal protein S18 OS=Mus musculus OX=10090 GN=Rps18 PE=1 SV=3	49	10	109	10	37.064	264.33	10	17.7	5.88396e+06	2.74087e+07	2.97054e+07	2.54146e+07	1.37933e+07	2.1786e+07	1.21967e+07	2.20189e+07	2.93065e+07	3.02973e+07	2.40191e+07	10	10	10	10	10	10	10	10	10	10	10	10	10	10	10	10	10	10	10	10	10	10
A2AJI0	245877	Map7d1	FALSE	MAP7 domain-containing protein 1 OS=Mus musculus OX=10090 GN=Map7d1 PE=1 SV=1	30	20	109	18	77.618	271.12	20	93.2	6.16802e+06	4.87262e+06	5.02335e+06	5.74803e+06	7.00145e+06	6.52444e+06	5.82856e+06	5.82146e+06	1.1039e+07	5.85782e+06	1.01493e+07	16	18	13	16	16	15	16	16	18	17	18	16	18	13	16	16	15	16	16	18	17	18
P16045	16852	Lgals1	FALSE	Galectin-1 OS=Mus musculus OX=10090 GN=Lgals1 PE=1 SV=3	95	10	109	10	49.444	277.54	10	14.9	6.39315e+06	1.29869e+07	1.76345e+07	2.97968e+07	1.43933e+07	8.08658e+07	2.09802e+07	1.82334e+07	5.89204e+07	7.77349e+07	5.79281e+07	7	8	8	9	8	10	8	8	9	9	9	7	8	8	9	8	10	8	8	9	9	9
P63242	276770	Eif5a	FALSE	Eukaryotic translation initiation factor 5A-1 OS=Mus musculus OX=10090 GN=Eif5a PE=1 SV=2	84	13	109	13	80.651	330.68	13	16.8	1.41677e+07	3.3603e+07	3.66014e+07	3.39402e+07	2.46973e+07	5.80126e+07	1.97041e+07	2.79352e+07	4.30241e+07	7.22908e+07	3.87949e+07	10	12	12	13	12	12	10	11	12	13	12	10	12	12	13	12	12	10	11	12	13	12
O35459	51798	Ech1	TRUE	Delta(3,5)-Delta(2,4)-dienoyl-CoA isomerase, mitochondrial OS=Mus musculus OX=10090 GN=Ech1 PE=1 SV=1	64	18	109	18	86.531	295.4	18	36.1	1.61521e+06	1.44959e+07	1.75721e+07	1.03917e+07	1.22706e+06	2.54866e+07	3.99899e+06	1.37839e+07	1.90014e+07	5.69282e+07	1.25174e+07	6	13	16	15	7	16	10	13	15	18	14	6	13	16	15	7	16	10	13	15	18	14
Q03734	20717	Serpina3m	FALSE	Serine protease inhibitor A3M OS=Mus musculus OX=10090 GN=Serpina3m PE=1 SV=2	46	16	109	9	76.17	317.75	16	47	4.66425e+07	1.89678e+07	1.46339e+07	2.95725e+07	4.23372e+07	1.89658e+07	1.54056e+07	2.56594e+07	1.18775e+07	8.83172e+06	2.16421e+07	15	14	13	15	15	12	13	14	11	11	12	15	14	13	15	15	12	13	14	11	11	12
D3Z6Q9	668218	Bin2	FALSE	Bridging integrator 2 OS=Mus musculus OX=10090 GN=Bin2 PE=1 SV=1	39	16	109	15	70.39	300.24	16	52.5	3.72102e+06	6.13504e+06	8.4884e+06	1.00012e+07	6.68615e+06	7.07227e+06	3.99056e+06	5.85631e+06	1.08258e+07	1.21429e+07	1.47147e+07	10	12	13	14	12	12	13	13	16	15	16	10	12	13	14	12	12	13	13	16	15	16
Q9D8X2	234388	Ccdc124	FALSE	Coiled-coil domain-containing protein 124 OS=Mus musculus OX=10090 GN=Ccdc124 PE=1 SV=1	54	15	109	15	63.438	278.52	15	25.3	3.63253e+07	2.2145e+07	2.17411e+07	2.39363e+07	4.38882e+07	1.97321e+07	2.88943e+07	2.69976e+07	5.30607e+07	2.6331e+07	4.37843e+07	15	15	13	15	15	14	15	14	15	13	15	15	15	13	15	15	14	15	14	15	13	15
P17047	16784	Lamp2	FALSE	Lysosome-associated membrane glycoprotein 2 OS=Mus musculus OX=10090 GN=Lamp2 PE=1 SV=2	19	9	109	9	32.195	231.24	9	45.7	1.45341e+07	5.44797e+07	6.69033e+07	7.59233e+07	31913065	6.87233e+07	3.36262e+07	4.84934e+07	1.0563e+08	8.66577e+07	8.92798e+07	6	7	8	8	6	8	7	6	9	9	7	6	7	8	8	6	8	7	6	9	9	7
Q922F4	67951	Tubb6	FALSE	Tubulin beta-6 chain OS=Mus musculus OX=10090 GN=Tubb6 PE=1 SV=1	35	14	109	3	63.442	310.45	14	50.1		328940	236026	240857		1.16702e+06	286086	278027	711798	754579	593633	5	13	12	12	5	13	10	11	13	13	13	5	13	12	12	5	13	10	11	13	13	13
P70670	17938	Naca	FALSE	Nascent polypeptide-associated complex subunit alpha, muscle-specific form OS=Mus musculus OX=10090 GN=Naca PE=1 SV=2	8	12	107	12	56.544	307.85	12	220.4	3.95448e+07	4.24615e+07	6.22898e+07	6.02633e+07	4.8178e+07	6.27224e+07	4.74208e+07	4.57104e+07	1.0722e+08	7.89385e+07	8.43906e+07	6	6	6	6	5	11	5	6	7	6	6	6	6	6	6	5	11	5	6	7	6	6
O08579	13726	Emd	FALSE	Emerin OS=Mus musculus OX=10090 GN=Emd PE=1 SV=1	67	12	107	12	70.858	310.7	12	29.4	1.06655e+07	1.22866e+07	1.29986e+07	1.2062e+07	1.34578e+07	1.44285e+07	1.13623e+07	1.40525e+07	1.7245e+07	1.56689e+07	1.92376e+07	12	12	12	12	12	12	12	12	11	12	12	12	12	12	12	12	12	12	12	11	12	12
Q9DCL8	66849	Ppp1r2	FALSE	Protein phosphatase inhibitor 2 OS=Mus musculus OX=10090 GN=Ppp1r2 PE=1 SV=3	68	12	107	12	89.387	337.19	12	23.1	1.71401e+07	1.49395e+07	1.34754e+07	1.68327e+07	2.20871e+07	1.4267e+07	1.63925e+07	1.70403e+07	3.99968e+07	2.14548e+07	3.1717e+07	12	11	9	9	10	11	12	12	11	12	11	12	11	9	9	10	11	12	12	11	12	11
Q8R5M8	54725	Cadm1	FALSE	Cell adhesion molecule 1 OS=Mus musculus OX=10090 GN=Cadm1 PE=1 SV=2	43	15	107	15	61.656	318.06	15	49.8	1.50414e+07	1.11801e+07	1.69451e+07	1.31289e+07	2.38772e+07	1.42481e+07	8.35477e+06	9.55113e+06	2.53623e+07	1.26083e+07	2.33569e+07	12	12	12	12	14	12	11	11	14	11	13	12	12	12	12	14	12	11	11	14	11	13
P37804	21345	Tagln	FALSE	Transgelin OS=Mus musculus OX=10090 GN=Tagln PE=1 SV=3	81	16	107	16	70.118	262.31	16	22.6	3.45417e+06	1.56045e+07	1.6101e+07	3.16777e+07	6.9128e+06	9.84637e+07	8.7635e+06	1.20867e+07	2.60993e+07	1.85632e+07	2.88311e+07	7	14	14	15	12	16	15	14	15	15	15	7	14	14	15	12	16	15	14	15	15	15
Q9D0M3	66445	Cyc1	TRUE	Cytochrome c1, heme protein, mitochondrial OS=Mus musculus OX=10090 GN=Cyc1 PE=1 SV=1	54	11	107	11	55.472	305.56	11	35.3	5.88497e+06	1.71116e+07	1.78483e+07	1.29996e+07	9.00901e+06	7.10788e+07	2.21008e+07	6.69326e+07	3.45975e+07	1.1014e+08	2.23382e+07	4	7	8	7	5	10	8	10	8	11	8	4	7	8	7	5	10	8	10	8	11	8
Q9R0P4	56372	1110004F10Rik	FALSE	Small acidic protein OS=Mus musculus OX=10090 GN=Smap PE=1 SV=1	31	7	107	7	54.443	319.84	7	20	1.00777e+07	7.78087e+06	6.88212e+06	9.65312e+06	1.13609e+07	7.54536e+06	1.12322e+07	1.1914e+07	2.5923e+07	1.5195e+07	1.71815e+07	6	5	5	5	6	5	5	6	7	6	6	6	5	5	5	6	5	5	6	7	6	6
P62843	20054	Rps15	FALSE	40S ribosomal protein S15 OS=Mus musculus OX=10090 GN=Rps15 PE=1 SV=2	70	7	107	7	65.698	364.43	7	17	7.07394e+06	2.45162e+07	2.03074e+07	2.33077e+07	1.44112e+07	2.15108e+07	1.35578e+07	2.79686e+07	4.9218e+07	4.35891e+07	3.47698e+07	6	6	7	7	6	6	6	6	7	7	7	6	6	7	7	6	6	6	6	7	7	7
Q8K3K8	71648	Optn	FALSE	Optineurin OS=Mus musculus OX=10090 GN=Optn PE=1 SV=1	39	21	107	21	81.454	264.4	21	67	3.72148e+06	4.72822e+06	5.66331e+06	4.60457e+06	3.56383e+06	1.1651e+07	1.26016e+07	8.95416e+06	1.72358e+07	2.25661e+07	7.36736e+06	16	16	18	14	15	19	19	18	18	21	17	16	16	18	14	15	19	19	18	18	21	17
Q62167	13205	Ddx3x	FALSE	ATP-dependent RNA helicase DDX3X OS=Mus musculus OX=10090 GN=Ddx3x PE=1 SV=3	20	11	107	7	49.824	271.09	11	73.1	2.23413e+07	2.46671e+07	1.70796e+07	2.32238e+07	2.78502e+07	1.638e+07	2.1063e+07	2.14847e+07	4.14994e+07	3.20904e+07	4.23928e+07	11	11	11	11	11	11	11	11	11	11	11	11	11	11	11	11	11	11	11	11	11	11
Q9CPQ1	12864	Cox6c	TRUE	Cytochrome c oxidase subunit 6C OS=Mus musculus OX=10090 GN=Cox6c PE=1 SV=3	79	9	107	9	55.441	252.58	9	8.5	5.16407e+07	6.26856e+07	6.74934e+07	5.36086e+07	7.01253e+07	2.85085e+07	2.15767e+07	1.37518e+07	2.51501e+07	2.73555e+07	4.57505e+07	9	9	9	9	9	8	9	8	9	9	9	9	9	9	9	9	8	9	8	9	9	9
O88522	16151	Ikbkg	FALSE	NF-kappa-B essential modulator OS=Mus musculus OX=10090 GN=Ikbkg PE=1 SV=2	39	14	107	14	65.359	321.19	14	47.9	1.2465e+07	1.01261e+07	1.12975e+07	1.0686e+07	1.53822e+07	1.15158e+07	1.81496e+07	1.36491e+07	2.86796e+07	1.92823e+07	2.34472e+07	12	13	12	12	12	10	14	13	14	12	13	12	13	12	12	12	10	14	13	14	12	13
O08692	18054	Ngp	FALSE	Neutrophilic granule protein OS=Mus musculus OX=10090 GN=Ngp PE=1 SV=1	62	12	107	12	59.591	271.96	12	19.3	1.6701e+07	9.20028e+06	1.0614e+07	1.04124e+07	1.9126e+07	4.49637e+07	3.52413e+07	3.17747e+07	4.6819e+07	4.97659e+07	3.16224e+07	10	10	10	10	10	11	10	10	11	10	10	10	10	10	10	10	11	10	10	11	10	10
Q8VBT6	171504	Apobr	FALSE	Apolipoprotein B receptor OS=Mus musculus OX=10090 GN=Apobr PE=1 SV=1	39	27	107	27	117.508	309.29	27	102.6	3.8682e+06	4.72775e+06	4.17055e+06	4.71016e+06	4.42919e+06	8.83117e+06	1.03959e+07	6.60316e+06	3.07576e+07	2.34692e+07	1.2524e+07	15	14	13	15	16	17	20	18	25	24	20	15	14	13	15	16	17	20	18	25	24	20
Q9D6U8	70186	Fam162a	TRUE	Protein FAM162A OS=Mus musculus OX=10090 GN=Fam162a PE=1 SV=1	44	10	107	10	53.51	289.7	10	17.7	2.80985e+07	3.08039e+07	3.27656e+07	2.6655e+07	4.40785e+07	4.76657e+07	5.14021e+07	7.63378e+07	7.86568e+07	7.27158e+07	5.90455e+07	10	10	10	10	10	10	10	10	10	10	10	10	10	10	10	10	10	10	10	10	10	10
Q80Y55	100383	Bsdc1	FALSE	BSD domain-containing protein 1 OS=Mus musculus OX=10090 GN=Bsdc1 PE=1 SV=1	43	13	107	13	60.305	336.96	13	46.9	1.3892e+07	1.31636e+07	1.3772e+07	1.38585e+07	1.47271e+07	1.36249e+07	1.18306e+07	1.21274e+07	2.36201e+07	1.34878e+07	1.88297e+07	13	13	13	13	13	13	13	13	13	13	13	13	13	13	13	13	13	13	13	13	13	13
Q8K1N2	208177	Phldb2	FALSE	Pleckstrin homology-like domain family B member 2 OS=Mus musculus OX=10090 GN=Phldb2 PE=1 SV=2	20	20	106	20	73.878	288.29	20	141.4	1.04797e+07	1.03327e+07	6.62054e+06	6.31006e+06	8.35262e+06	4.6297e+06	5.86833e+06	5.5225e+06	5.60035e+06	4.24737e+06	8.62062e+06	19	19	17	17	18	16	16	17	16	16	19	19	19	17	17	18	16	16	17	16	16	19
P43024	12861	Cox6a1	TRUE	Cytochrome c oxidase subunit 6A1, mitochondrial OS=Mus musculus OX=10090 GN=Cox6a1 PE=1 SV=2	61	4	105	4	35.557	313.77	4	12.3	3.55357e+07	6.46721e+07	5.88593e+07	6.089e+07	7.28329e+07	1.60212e+07	9.1181e+06	5.26545e+06	5.34679e+07	4.07033e+07	6.17239e+07	4	4	4	4	4	4	4	4	4	4	4	4	4	4	4	4	4	4	4	4	4	4
Q8CHT0	212647	Aldh4a1	TRUE	Delta-1-pyrroline-5-carboxylate dehydrogenase, mitochondrial OS=Mus musculus OX=10090 GN=Aldh4a1 PE=1 SV=3	37	14	105	14	68.81	305.93	14	61.8	9.92339e+06	1.59195e+07	1.79316e+07	4.2886e+07	1.89606e+07	2.29588e+07	2.34744e+07	3.83264e+07	5.25336e+07	4.4179e+07	3.40827e+07	8	12	12	12	10	11	9	12	11	12	12	8	12	12	12	10	11	9	12	11	12	12
Q9CQV1	66449	Pam16	TRUE	Mitochondrial import inner membrane translocase subunit TIM16 OS=Mus musculus OX=10090 GN=Pam16 PE=1 SV=1	81	9	105	9	39.742	334.23	9	13.8	1.69679e+07	1.29089e+07	1.60034e+07	1.32197e+07	2.26514e+07	2.94157e+07	4.16656e+07	4.2044e+07	6.2869e+07	4.73376e+07	2.926e+07	8	8	8	8	8	8	9	8	9	8	8	8	8	8	8	8	8	9	8	9	8	8
O70252	15369	Hmox2	FALSE	Heme oxygenase 2 OS=Mus musculus OX=10090 GN=Hmox2 PE=1 SV=1	60	15	105	15	72.681	294.47	15	35.7	7.38429e+06	2.12733e+07	1.86791e+07	1.62821e+07	1.20267e+07	3.63937e+07	2.73899e+07	4.07783e+07	4.57889e+07	5.53889e+07	3.18037e+07	9	12	12	12	12	13	12	13	12	15	12	9	12	12	12	12	13	12	13	12	15	12
Q921T2	208263	Tor1aip1	FALSE	Torsin-1A-interacting protein 1 OS=Mus musculus OX=10090 GN=Tor1aip1 PE=1 SV=3	31	16	105	16	64.653	282.7	16	66.7	1.44326e+07	1.68975e+07	1.44843e+07	1.51429e+07	1.50429e+07	1.22038e+07	7.30968e+06	1.09787e+07	1.23378e+07	1.33989e+07	1.90414e+07	12	16	16	14	15	16	13	14	15	15	15	12	16	16	14	15	16	13	14	15	15	15
P56812	56330	Pdcd5	FALSE	Programmed cell death protein 5 OS=Mus musculus OX=10090 GN=Pdcd5 PE=1 SV=3	56	7	105	7	36.485	300.2	7	14.3	6.40737e+07	5.4037e+07	5.01313e+07	6.93156e+07	1.03607e+08	4.25899e+07	6.1379e+07	6.81016e+07	9.60049e+07	6.03698e+07	9.14072e+07	7	7	7	7	7	7	7	7	7	7	7	7	7	7	7	7	7	7	7	7	7	7
Q9D8S9	69168	Bola1	TRUE	BolA-like protein 1 OS=Mus musculus OX=10090 GN=Bola1 PE=1 SV=1	69	7	105	7	54.62	349.61	7	14.4	3.56031e+07	3.10012e+07	2.94569e+07	3.87151e+07	4.98183e+07	4.41841e+07	8.81673e+07	8.45484e+07	1.30373e+08	9.60846e+07	7.8014e+07	7	7	7	7	7	7	7	7	7	7	7	7	7	7	7	7	7	7	7	7	7	7
Q9QXD6	14121	Fbp1	FALSE	Fructose-1,6-bisphosphatase 1 OS=Mus musculus OX=10090 GN=Fbp1 PE=1 SV=3	46	12	104	12	62.806	299.9	12	36.9	1.35148e+07	1.86549e+07	2.54796e+07	1.64539e+07	2.56322e+07	8.13355e+06	9.69027e+06	1.35284e+07	1.29385e+07	1.02351e+07	1.62991e+07	7	11	12	10	8	7	8	9	9	10	8	7	11	12	10	8	7	8	9	9	10	8
Q61699	15505	Hsph1	FALSE	Heat shock protein 105 kDa OS=Mus musculus OX=10090 GN=Hsph1 PE=1 SV=2	18	14	104	13	64.12	264.81	14	96.3	1.34405e+07	7.29688e+06	7.00888e+06	9.1398e+06	8.96113e+06	3.33891e+06	6.8342e+06	4.99035e+06	1.33773e+07	9.58242e+06	1.43386e+07	13	12	12	13	12	12	12	11	14	12	13	13	12	12	13	12	12	12	11	14	12	13
Q99MD9	50927	Nasp	FALSE	Nuclear autoantigenic sperm protein OS=Mus musculus OX=10090 GN=Nasp PE=1 SV=2	43	20	104	20	82.327	336.71	20	83.9	2.16103e+06	6.44474e+06	6.86506e+06	8.01475e+06	2.91155e+06	1.14062e+07	7.42538e+06	7.06172e+06	2.4477e+07	1.42577e+07	1.30594e+07	7	12	13	12	11	14	15	15	20	17	16	7	12	13	12	11	14	15	15	20	17	16
P10639	22166	Txn1	FALSE	Thioredoxin OS=Mus musculus OX=10090 GN=Txn PE=1 SV=3	57	6	104	6	28.596	272.51	6	11.7	5.86278e+07	1.81463e+08	1.98268e+08	1.71647e+08	9.48477e+07	2.15883e+08	9.37887e+07	1.29762e+08	1.69071e+08	1.99101e+08	1.79759e+08	6	6	6	6	5	6	6	6	6	6	6	6	6	6	6	5	6	6	6	6	6	6
P98078	13132	Dab2	FALSE	Disabled homolog 2 OS=Mus musculus OX=10090 GN=Dab2 PE=1 SV=2	28	15	103	15	60.308	273.08	15	82.3	8.9079e+06	1.03239e+07	9.18136e+06	1.12111e+07	1.05255e+07	8.10102e+06	1.02672e+07	9.75336e+06	1.18665e+07	1.2333e+07	1.77553e+07	14	15	13	15	15	12	15	13	13	15	14	14	15	13	15	15	12	15	13	13	15	14
P15331	19132	Prph	FALSE	Peripherin OS=Mus musculus OX=10090 GN=Prph PE=1 SV=2	25	12	103	8	42.837	272.82	12	54.2	141803		130848	419944	53681.7	5.29372e+06			64877.1		799686	6	4	6	8	5	12	4	4	5	4	8	6	4	6	8	5	12	4	4	5	4	8
Q9WV54	11886	Asah1	FALSE	Acid ceramidase OS=Mus musculus OX=10090 GN=Asah1 PE=1 SV=1	39	14	103	14	54.862	288.34	14	44.6	951960	9.71267e+06	1.21874e+07	1.01109e+07	3.01364e+06	1.06882e+07	5.00855e+06	8.30908e+06	1.35308e+07	1.35914e+07	1.06505e+07	7	13	14	13	11	12	13	12	13	13	13	7	13	14	13	11	12	13	12	13	13	13
P16015	12350	Car3	FALSE	Carbonic anhydrase 3 OS=Mus musculus OX=10090 GN=Ca3 PE=1 SV=3	66	13	103	13	72.884	286.59	13	29.3	8.81922e+07	6.72618e+07	8.02088e+07	7.79055e+07	1.2997e+08	3.12753e+07	2.50675e+07	5.35426e+07	2.96328e+07	3.70043e+07	1.58502e+08	11	13	13	13	13	12	10	11	9	13	12	11	13	13	13	13	12	10	11	9	13	12
Q9D6K5	24071	Synj2bp	TRUE	Synaptojanin-2-binding protein OS=Mus musculus OX=10090 GN=Synj2bp PE=1 SV=1	87	9	103	9	44.081	296.4	9	15.8	2.82865e+07	2.60925e+07	3.08514e+07	2.81613e+07	4.10487e+07	2.31346e+07	2.45659e+07	3.116e+07	3.5397e+07	2.69804e+07	4.16456e+07	8	8	7	8	9	7	9	8	7	9	8	8	8	7	8	9	7	9	8	7	9	8
Q6P8I4	76302	Pcnp	FALSE	PEST proteolytic signal-containing nuclear protein OS=Mus musculus OX=10090 GN=Pcnp PE=1 SV=1	65	11	103	11	45.767	280.21	11	19	2.99293e+07	2.54568e+07	2.55433e+07	3.6977e+07	5.20828e+07	1.8989e+07	2.34002e+07	2.39013e+07	6.17056e+07	2.42453e+07	4.76226e+07	10	10	10	11	11	10	10	11	11	10	11	10	10	10	11	11	10	10	11	11	10	11
Q8C7E7	52331	Stbd1	FALSE	Starch-binding domain-containing protein 1 OS=Mus musculus OX=10090 GN=Stbd1 PE=1 SV=1	33	9	102	9	48.407	280.72	9	36.1	4.31472e+07	1.69103e+07	1.35272e+07	1.71974e+07	4.03035e+07	2.29613e+07	4.58756e+07	3.78682e+07	1.94451e+07	2.85604e+07	3.96501e+07	9	9	9	9	9	9	9	9	9	9	9	9	9	9	9	9	9	9	9	9	9	9
Q8CGK3	74142	Lonp1	TRUE	Lon protease homolog, mitochondrial OS=Mus musculus OX=10090 GN=Lonp1 PE=1 SV=2	37	23	102	23	113.332	316.04	23	105.8	562703	4.06606e+06	4.10632e+06	2.88987e+06	1.58143e+06	1.85767e+07	1.34476e+07	2.22787e+07	3.19267e+07	4.12378e+07	1.0286e+07	5	14	15	13	9	19	19	19	21	22	16	5	14	15	13	9	19	19	19	21	22	16
P62806	69386	H4c8	FALSE	Histone H4 OS=Mus musculus OX=10090 GN=H4c1 PE=1 SV=2	53	8	102	8	37.155	267.69	8	11.4	6.86627e+06	4.77969e+07	5.46661e+07	3.7132e+07	2.57136e+07	5.6846e+07	5.94932e+06	2.99305e+07	4.46946e+07	7.69961e+07	3.48252e+07	6	7	7	7	7	7	5	7	8	8	6	6	7	7	7	7	7	5	7	8	8	6
Q9WVA2	30058	Timm8a1	TRUE	Mitochondrial import inner membrane translocase subunit Tim8 A OS=Mus musculus OX=10090 GN=Timm8a1 PE=1 SV=1	82	6	102	6	39.379	291.17	6	11	3.68379e+07	4.32187e+07	4.99708e+07	6.81961e+07	5.80131e+07	1.03859e+08	1.17156e+08	1.44935e+08	2.41475e+08	2.13837e+08	1.44237e+08	5	5	5	5	5	5	5	5	6	6	6	5	5	5	5	5	5	5	5	6	6	6
Q3THW5	77605	H2az2	FALSE	Histone H2A.V OS=Mus musculus OX=10090 GN=H2az2 PE=1 SV=3	54	5	101	3	23.077	260.28	5	13.5	3.11001e+06	1.61473e+07	1.2191e+07	1.0344e+07	1.15758e+07	1.17611e+07	2.35807e+06	7.26035e+06	1.12844e+07	19638762	1.17797e+07	5	5	5	5	5	5	5	5	5	5	5	5	5	5	5	5	5	5	5	5	5	5
Q8R1S4	211401	Mtss1	FALSE	Protein MTSS 1 OS=Mus musculus OX=10090 GN=Mtss1 PE=1 SV=1	33	17	101	17	71.825	320.08	17	82.4	1.24661e+07	1.64001e+07	1.59776e+07	1.38338e+07	1.39984e+07	7.14192e+06	8.51436e+06	1.20649e+07	7.16931e+06	9.76644e+06	1.58026e+07	11	13	16	16	12	14	12	15	13	15	14	11	13	16	16	12	14	12	15	13	15	14
Q3UIU2	230075	Ndufb6	TRUE	NADH dehydrogenase [ubiquinone] 1 beta subcomplex subunit 6 OS=Mus musculus OX=10090 GN=Ndufb6 PE=1 SV=3	79	10	100	10	38.675	211.8	10	15.5	6.69965e+06	1.41174e+07	1.32903e+07	9.81488e+06	7.39793e+06	3.99097e+07	2.7818e+07	4.53056e+07	2.05005e+07	3.59243e+07	2.29057e+07	7	9	8	8	8	10	10	10	10	10	10	7	9	8	8	8	10	10	10	10	10	10
Q80VJ2	24068	Sra1	FALSE	Steroid receptor RNA activator 1 OS=Mus musculus OX=10090 GN=Sra1 PE=1 SV=3	47	9	100	9	63.896	294.33	9	25.5	9.99111e+06	8.19109e+06	9.45981e+06	7.75051e+06	1.22799e+07	1.01235e+07	1.0081e+07	1.15546e+07	2.173e+07	1.53564e+07	1.70054e+07	9	9	9	9	9	9	9	9	9	9	9	9	9	9	9	9	9	9	9	9	9	9
P35505	14085	Fah	FALSE	Fumarylacetoacetase OS=Mus musculus OX=10090 GN=Fah PE=1 SV=2	54	14	100	14	62.179	303.25	14	46.1	1.74221e+07	2.56909e+07	3.40972e+07	3.04651e+07	3.09543e+07	1.17887e+07	1.38266e+07	1.86219e+07	2.16381e+07	1.44565e+07	2.62688e+07	11	12	14	12	12	11	12	12	11	13	13	11	12	14	12	12	11	12	12	11	13	13
Q62048	18611	Pea15a	FALSE	Astrocytic phosphoprotein PEA-15 OS=Mus musculus OX=10090 GN=Pea15 PE=1 SV=1	72	8	100	8	50.562	320.09	8	15	9.6358e+06	1.51575e+07	1.53865e+07	2.01577e+07	1.58852e+07	3.48505e+07	2.72923e+07	2.3195e+07	4.02918e+07	3.80338e+07	3.42846e+07	6	6	7	7	6	7	8	7	8	7	8	6	6	7	7	6	7	8	7	8	7	8
Q91Z38	66827	Ttc1	FALSE	Tetratricopeptide repeat protein 1 OS=Mus musculus OX=10090 GN=Ttc1 PE=1 SV=1	50	12	100	12	54.413	294.71	12	33.2	1.63034e+07	1.3378e+07	1.50355e+07	1.41528e+07	1.96414e+07	9.64048e+06	1.58285e+07	1.37238e+07	3.3339e+07	2.14377e+07	2.81333e+07	12	11	12	10	12	10	12	12	12	12	12	12	11	12	10	12	10	12	12	12	12	12
Q9JK53	116847	Prelp	FALSE	Prolargin OS=Mus musculus OX=10090 GN=Prelp PE=1 SV=2	34	12	99	12	54.137	273.89	12	43.3	9.52842e+06	5.15344e+07	5.46005e+07	4.67557e+07	1.78065e+07	1.50088e+08	2.30825e+07	6.91764e+07	7.43222e+07	1.46804e+08	5.17817e+07	11	12	12	12	12	12	11	12	11	12	12	11	12	12	12	12	12	11	12	11	12	12
O35226	19185	Psmd4	FALSE	26S proteasome non-ATPase regulatory subunit 4 OS=Mus musculus OX=10090 GN=Psmd4 PE=1 SV=1	37	13	99	13	55.361	290.01	13	40.7	1.12667e+07	1.87755e+07	1.99409e+07	1.82599e+07	1.28668e+07	2.26281e+07	7.4769e+06	1.14897e+07	2.32561e+07	2.29258e+07	2.2625e+07	10	10	12	12	10	11	10	10	10	10	10	10	10	12	12	10	11	10	10	10	10	10
O88271	23837	Cfdp1	FALSE	Craniofacial development protein 1 OS=Mus musculus OX=10090 GN=Cfdp1 PE=1 SV=1	39	12	99	12	67.233	299.18	12	32.9	2.11139e+07	2.16019e+07	1.79851e+07	2.22453e+07	2.66827e+07	1.38468e+07	2.11449e+07	2.01539e+07	4.93783e+07	2.50186e+07	3.48061e+07	10	11	11	11	11	9	11	10	12	11	12	10	11	11	11	11	9	11	10	12	11	12
Q9JJU8	56726	Sh3bgrl	FALSE	SH3 domain-binding glutamic acid-rich-like protein OS=Mus musculus OX=10090 GN=Sh3bgrl PE=1 SV=1	85	10	99	10	45.819	293.62	10	12.8	1.41728e+07	1.89673e+07	2.28277e+07	2.20555e+07	2.07725e+07	2.80579e+07	2.20428e+07	1.56486e+07	3.20216e+07	2.33175e+07	3.80721e+07	9	9	9	9	9	9	10	9	10	9	10	9	9	9	9	9	9	10	9	10	9	10
P97379	23881	G3bp2	FALSE	Ras GTPase-activating protein-binding protein 2 OS=Mus musculus OX=10090 GN=G3bp2 PE=1 SV=2	36	14	99	13	63.157	259.18	14	54.1	8.2829e+06	1.1072e+07	8.96679e+06	8.80995e+06	7.65783e+06	1.22068e+07	6.56976e+06	6.55844e+06	1.02915e+07	1.29627e+07	1.5247e+07	12	12	11	12	10	10	12	11	13	12	13	12	12	11	12	10	10	12	11	13	12	13
Q8K2C7	216440	Os9	FALSE	Protein OS-9 OS=Mus musculus OX=10090 GN=Os9 PE=1 SV=2	33	19	99	19	75.725	262.79	19	76.1	6.39494e+06	8.44695e+06	8.54826e+06	8.05273e+06	6.86704e+06	6.31222e+06	4.95208e+06	4.31478e+06	8.51143e+06	1.08431e+07	1.07315e+07	17	16	18	18	16	16	16	13	16	18	16	17	16	18	18	16	16	16	13	16	18	16
Q99MR6	83701	Srrt	FALSE	Serrate RNA effector molecule homolog OS=Mus musculus OX=10090 GN=Srrt PE=1 SV=1	27	19	98	19	72.157	251.97	19	100.4	1.31588e+07	1.88013e+07	2.09285e+07	1.90954e+07	1.73814e+07	1.90549e+07	1.19608e+07	1.68798e+07	2.85031e+07	2.43927e+07	2.75669e+07	13	19	17	17	12	17	14	17	16	17	16	13	19	17	17	12	17	14	17	16	17	16
Q99LI8	15239	Hgs	FALSE	Hepatocyte growth factor-regulated tyrosine kinase substrate OS=Mus musculus OX=10090 GN=Hgs PE=1 SV=2	29	18	98	18	73.14	257.17	18	86	2.25208e+06	9.28797e+06	1.0577e+07	6.84214e+06	3.24861e+06	1.25972e+07	6.55114e+06	1.09353e+07	2.01441e+07	1.74946e+07	1.12217e+07	10	17	17	15	11	15	13	16	16	16	15	10	17	17	15	11	15	13	16	16	16	15
Q62261	20742	Sptbn1	FALSE	Spectrin beta chain, non-erythrocytic 1 OS=Mus musculus OX=10090 GN=Sptbn1 PE=1 SV=2	18	31	98	31	113.129	268.34	31	274.1	2.10587e+06	6.5726e+06	5.34049e+06	5.17137e+06	1.11161e+06	1.45345e+07	4.43419e+06	6.74699e+06	7.47902e+06	1.12259e+07	8.06449e+06	12	25	26	22	7	28	20	24	19	28	24	12	25	26	22	7	28	20	24	19	28	24
P41317	17195	Mbl2	FALSE	Mannose-binding protein C OS=Mus musculus OX=10090 GN=Mbl2 PE=1 SV=2	34	9	98	9	32.975	282.18	9	25.9	9.33512e+06	3.38766e+07	4.04012e+07	3.87481e+07	1.56517e+07	2.44185e+07	1.14862e+07	1.46304e+07	1.80267e+07	1.25849e+07	3.9414e+07	9	9	9	9	9	9	9	9	9	9	9	9	9	9	9	9	9	9	9	9	9	9
Q9DAU1	72029	Cnpy3	FALSE	Protein canopy homolog 3 OS=Mus musculus OX=10090 GN=Cnpy3 PE=1 SV=1	42	11	98	11	41.235	274.86	11	30.5	1.58393e+07	2.1553e+07	2.08064e+07	2.87785e+07	2.05179e+07	1.38562e+07	1.23833e+07	1.41414e+07	2.35879e+07	1.47686e+07	2.80314e+07	11	11	11	11	11	10	10	11	11	10	11	11	11	11	11	11	10	10	11	11	10	11
Q9WUR9	11639	Ak4	TRUE	Adenylate kinase 4, mitochondrial OS=Mus musculus OX=10090 GN=Ak4 PE=1 SV=1	65	11	97	11	65.922	273.99	11	25	1.80825e+06	1.15366e+07	1.30315e+07	6.75942e+06	4.22485e+06	3.74183e+07	1.47047e+07	4.20394e+07	3.94682e+07	7.07472e+07	1.58525e+07	6	9	10	8	9	11	11	11	11	11	11	6	9	10	8	9	11	11	11	11	11	11
Q6ZPZ3	330474	Zc3h4	FALSE	Zinc finger CCCH domain-containing protein 4 OS=Mus musculus OX=10090 GN=Zc3h4 PE=1 SV=2	22	17	97	17	73.452	267.01	17	140.9	7.17565e+06	4.7773e+06	4.42039e+06	5.19329e+06	6.99038e+06	3.74533e+06	5.85343e+06	5.33283e+06	8.31659e+06	4.78274e+06	8.64429e+06	17	15	14	16	16	14	16	16	15	16	16	17	15	14	16	16	14	16	16	15	16	16
Q9D8L5	67015	Ccdc91	FALSE	Coiled-coil domain-containing protein 91 OS=Mus musculus OX=10090 GN=Ccdc91 PE=1 SV=2	33	15	97	15	50.289	253.21	15	50	5.76261e+06	6.09578e+06	5.94008e+06	7.30986e+06	6.24027e+06	7.66656e+06	7.53209e+06	7.35118e+06	1.36619e+07	7.96155e+06	1.04502e+07	14	13	13	13	12	14	14	13	14	13	14	14	13	13	13	12	14	14	13	14	13	14
Q9CQV8	54401	Ywhab	FALSE	14-3-3 protein beta/alpha OS=Mus musculus OX=10090 GN=Ywhab PE=1 SV=3	59	13	97	5	62.309	255.13	13	28.1	1.05174e+06	1.9544e+06	1.89655e+06	1.41428e+06	1.38805e+06	5.23427e+06	1.74617e+06	1.29608e+06	2.23594e+06	4.1179e+06	1.5752e+06	8	12	11	10	8	13	10	9	10	11	9	8	12	11	10	8	13	10	9	10	11	9
Q99L45	67204	Eif2s2	FALSE	Eukaryotic translation initiation factor 2 subunit 2 OS=Mus musculus OX=10090 GN=Eif2s2 PE=1 SV=1	44	14	97	14	68.666	288.11	14	38.1	1.17771e+07	1.23999e+07	1.08928e+07	1.20505e+07	14962794	1.34194e+07	1.07959e+07	1.36228e+07	1.56377e+07	1.7875e+07	1.7935e+07	11	12	11	12	12	11	10	11	12	13	11	11	12	11	12	12	11	10	11	12	13	11
P11352	14775	Gpx1	TRUE	Glutathione peroxidase 1 OS=Mus musculus OX=10090 GN=Gpx1 PE=1 SV=2	46	9	97	9	41.967	237.25	9	22.3	7.77145e+06	3.17966e+07	3.77347e+07	2.49552e+07	1.11619e+07	4.00493e+07	1.84e+07	3.41314e+07	3.93782e+07	5.08687e+07	2.84585e+07	9	9	9	9	8	8	9	8	9	9	9	9	9	9	9	8	8	9	8	9	9	9
Q810U5	67501	Ccdc50	FALSE	Coiled-coil domain-containing protein 50 OS=Mus musculus OX=10090 GN=Ccdc50 PE=1 SV=1	45	11	97	11	54.943	280.66	11	35.3	1.09714e+07	7.37052e+06	7.75236e+06	8.64445e+06	1.23285e+07	8.08902e+06	1.19919e+07	1.13281e+07	2.05374e+07	1.38786e+07	2.1877e+07	11	11	11	11	11	10	11	11	11	11	11	11	11	11	11	11	10	11	11	11	11	11
Q62189	53607	Snrpa	FALSE	U1 small nuclear ribonucleoprotein A OS=Mus musculus OX=10090 GN=Snrpa PE=1 SV=3	48	11	96	10	53.133	259.87	11	31.8	6.46441e+06	1.52317e+07	1.60879e+07	1.29944e+07	1.31749e+07	1.17588e+07	7.92041e+06	1.50348e+07	2.13562e+07	1.74752e+07	1.43499e+07	9	10	9	10	10	10	10	10	10	11	10	9	10	9	10	10	10	10	10	10	11	10
Q5SX39	17884	Myh4	FALSE	Myosin-4 OS=Mus musculus OX=10090 GN=Myh4 PE=1 SV=1	34	68	96	18	304.896	301.32	68	222.7	1.44711e+06	1.21217e+06	746565	1.31203e+06	1.65776e+06	2.66983e+08	1.01538e+06	1.16379e+06	2.18519e+06	2.95138e+06	1.52873e+06	8	4	5	6	6	68	8	4	7	11	6	8	4	5	6	6	68	8	4	7	11	6
Q03958	14976	Pfdn6	FALSE	Prefoldin subunit 6 OS=Mus musculus OX=10090 GN=Pfdn6 PE=1 SV=1	58	11	96	11	45.721	252.99	11	14.4	2.64227e+07	2.21213e+07	1.99336e+07	2.72435e+07	3.94894e+07	2.02444e+07	3.13843e+07	3.02531e+07	6.82569e+07	3.24182e+07	5.01426e+07	10	10	11	11	11	9	10	11	11	10	11	10	10	11	11	11	9	10	11	11	10	11
P63325	67097	Rps10	FALSE	40S ribosomal protein S10 OS=Mus musculus OX=10090 GN=Rps10 PE=1 SV=1	50	8	95	8	33.479	270.12	8	18.9	8.48723e+06	2.93798e+07	3.36613e+07	2.45342e+07	1.68007e+07	2.54021e+07	1.44341e+07	2.25208e+07	2.8262e+07	3.5414e+07	2.74958e+07	8	8	8	8	8	7	8	7	7	8	8	8	8	8	8	8	7	8	7	7	8	8
Q63850	18226	Nup62	FALSE	Nuclear pore glycoprotein p62 OS=Mus musculus OX=10090 GN=Nup62 PE=1 SV=2	29	13	95	13	71.215	294.06	13	53.2	2.22749e+07	1.34864e+07	1.40505e+07	1.6066e+07	2.30836e+07	1.31889e+07	1.62897e+07	1.57244e+07	2.72151e+07	1.68347e+07	2.26252e+07	13	12	10	12	13	10	12	12	11	11	11	13	12	10	12	13	10	12	12	11	11	11
P43276	56702	H1f5	FALSE	Histone H1.5 OS=Mus musculus OX=10090 GN=H1-5 PE=1 SV=2	36	10	95	7	40.559	231.98	10	22.6	4.81345e+06	2.33374e+07	1.60946e+07	1.84824e+07	1.01711e+07	3.70518e+07	9.34647e+06	1.50772e+07	4.48741e+07	5.30093e+07	3.27715e+07	7	8	8	9	8	9	8	9	10	10	9	7	8	8	9	8	9	8	9	10	10	9
Q6ZQ58	73158	Larp1	FALSE	La-related protein 1 OS=Mus musculus OX=10090 GN=Larp1 PE=1 SV=3	25	17	95	17	75.33	289.41	17	121.1	8.70488e+06	1.12857e+07	9.19941e+06	8.35245e+06	7.86963e+06	4.71917e+06	3.48124e+06	6.95919e+06	5.90547e+06	8.17015e+06	9.47778e+06	13	15	14	13	12	11	12	12	12	13	13	13	15	14	13	12	11	12	12	12	13	13
O55042	20617	Snca	FALSE	Alpha-synuclein OS=Mus musculus OX=10090 GN=Snca PE=1 SV=2	60	10	95	10	45.311	338.16	10	14.5	4.43654e+07	3.5052e+07	27678910	6.3241e+07	4.03039e+07	3.59152e+07	2.81543e+07	3.80656e+07	5.33229e+07	4.43299e+07	5.09064e+07	9	9	8	9	9	8	9	9	10	9	9	9	9	8	9	9	8	9	9	10	9	9
P70302	20866	Stim1	FALSE	Stromal interaction molecule 1 OS=Mus musculus OX=10090 GN=Stim1 PE=1 SV=2	41	20	95	20	82.748	256.48	20	77.5	4.00346e+06	1.33939e+07	1.43886e+07	1.13026e+07	5.53488e+06	1.32424e+07	3.68487e+06	9.50647e+06	7.43887e+06	9.0743e+06	1.12726e+07	10	15	16	16	13	16	10	15	14	15	16	10	15	16	16	13	16	10	15	14	15	16
O88492	57435	Plin4	FALSE	Perilipin-4 OS=Mus musculus OX=10090 GN=Plin4 PE=1 SV=2	42	19	95	19	86.477	275.9	19	139.3	3.17214e+06	63730.3	80077.4	3.03893e+06	4.1006e+06	1.42643e+07	7.29351e+06	8.02999e+06	1.10797e+07	2.22113e+07	3.11209e+07	11	1	1	10	12	16	15	13	15	16	18	11	1	1	10	12	16	15	13	15	16	18
Q9CR86	52502	Carhsp1	FALSE	Calcium-regulated heat stable protein 1 OS=Mus musculus OX=10090 GN=Carhsp1 PE=1 SV=1	73	6	94	6	28.483	293.19	6	16.1	2.352e+07	3.66156e+07	3.77726e+07	3.82434e+07	3.99285e+07	3.74561e+07	3.21801e+07	3.22994e+07	4.84979e+07	3.79504e+07	5.73819e+07	6	6	6	6	6	6	6	6	6	6	6	6	6	6	6	6	6	6	6	6	6	6
O09131	14873	Gsto1	FALSE	Glutathione S-transferase omega-1 OS=Mus musculus OX=10090 GN=Gsto1 PE=1 SV=2	50	12	94	12	53.389	230.94	12	27.5	700156	1.62157e+07	2.05597e+07	1.012e+07	1.81218e+06	2.16925e+07	4.96447e+06	1.38143e+07	1.9501e+07	3.3758e+07	1.02063e+07	4	12	12	10	5	12	9	11	11	12	11	4	12	12	10	5	12	9	11	11	12	11
Q8R1N0	66983	Zfp830	FALSE	Zinc finger protein 830 OS=Mus musculus OX=10090 GN=Znf830 PE=1 SV=1	56	14	94	14	61.146	277.55	14	40.6	1.00258e+07	6.45489e+06	6.16928e+06	6.88221e+06	1.16143e+07	4.29729e+06	4.99993e+06	5.59212e+06	9.76465e+06	5.43289e+06	1.17569e+07	12	11	12	11	14	10	12	11	12	10	12	12	11	12	11	14	10	12	11	12	10	12
Q8VEA4	72170	Chchd4	TRUE	Mitochondrial intermembrane space import and assembly protein 40 OS=Mus musculus OX=10090 GN=Chchd4 PE=1 SV=1	42	6	94	6	36.108	218.74	6	15.5	1.27145e+07	1.21609e+07	8.23382e+06	2.2296e+07	1.65645e+07	3.2989e+07	2.7921e+07	4.36702e+07	3.40342e+07	4.26461e+07	2.41328e+07	4	4	4	5	4	5	6	4	5	5	4	4	4	4	5	4	5	6	4	5	5	4
Q8VDD8	68767	Washc1	FALSE	WASH complex subunit 1 OS=Mus musculus OX=10090 GN=Washc1 PE=1 SV=1	35	11	94	11	58.897	288.24	11	51.6	4.2524e+06	7.71579e+06	8.69897e+06	8.8346e+06	5.5941e+06	7.879e+06	5.27856e+06	7.46879e+06	1.06758e+07	9.34259e+06	1.02519e+07	8	9	9	10	8	9	10	10	9	10	10	8	9	9	10	8	9	10	10	9	10	10
Q8R121	217847	Serpina10	FALSE	Protein Z-dependent protease inhibitor OS=Mus musculus OX=10090 GN=Serpina10 PE=1 SV=1	42	14	94	14	57.729	240	14	51.8	1.11233e+07	8.96739e+06	7.58167e+06	1.33979e+07	1.00027e+07	6.94191e+06	5.1615e+06	6.87967e+06	8.70967e+06	6.71495e+06	1.33284e+07	14	14	11	14	14	11	12	11	14	12	14	14	14	11	14	14	11	12	11	14	12	14
Q8QZT1	110446	Acat1	TRUE	Acetyl-CoA acetyltransferase, mitochondrial OS=Mus musculus OX=10090 GN=Acat1 PE=1 SV=1	30	12	94	12	58.47	291.68	12	44.8	8.07223e+06	1.42747e+07	1.61656e+07	1.53502e+07	1.20269e+07	1.50095e+07	1.18782e+07	2.18156e+07	3.23059e+07	3.34574e+07	2.2764e+07	11	10	10	11	10	10	11	11	12	11	11	11	10	10	11	10	10	11	11	12	11	11
Q9Z130	50926	Hnrnpdl	FALSE	Heterogeneous nuclear ribonucleoprotein D-like OS=Mus musculus OX=10090 GN=Hnrnpdl PE=1 SV=1	30	10	93	8	40.987	217.46	10	33.5	5.82702e+06	5.6415e+06	5.23832e+06	5.80192e+06	7.81761e+06	4.93705e+06	4.28531e+06	5.66747e+06	1.26207e+07	7.68422e+06	9.02716e+06	8	8	9	9	9	8	9	8	10	9	9	8	8	9	9	9	8	9	8	10	9	9
Q80XI3	230861	Eif4g3	FALSE	Eukaryotic translation initiation factor 4 gamma 3 OS=Mus musculus OX=10090 GN=Eif4g3 PE=1 SV=2	10	11	93	8	51.823	260.71	11	174.8	3.22313e+06	1.82441e+06	1.3484e+06	1.67169e+06	2.05308e+06	2.02829e+06	2.84659e+06	2.54818e+06	2.63053e+06	3.14182e+06	2.52381e+06	10	10	10	10	10	10	12	12	10	12	10	10	10	10	10	10	10	12	12	10	12	10
P10922	14958	H1f0	FALSE	Histone H1.0 OS=Mus musculus OX=10090 GN=H1-0 PE=2 SV=4	32	6	93	6	33.481	256.42	6	20.8	1.61675e+07	1.14144e+08	6.14596e+07	6.31773e+07	3.16982e+07	6.39958e+07	2.0795e+07	6.0414e+07	5.63943e+07	7.46947e+07	4.2568e+07	5	6	5	5	5	5	6	5	5	5	5	5	6	5	5	5	5	6	5	5	5	5
P56391	110323	Cox6b1	TRUE	Cytochrome c oxidase subunit 6B1 OS=Mus musculus OX=10090 GN=Cox6b1 PE=1 SV=2	63	7	93	7	29.002	242.34	7	10.1	3.97719e+07	1.02973e+08	1.00945e+08	9.21756e+07	9.6183e+07	4.10337e+07	1.15628e+07	1.04687e+07	4.6473e+07	3.45506e+07	5.62059e+07	6	6	6	7	6	6	6	6	7	7	7	6	6	6	7	6	6	6	6	7	7	7
Q3UM45	66385	Ppp1r7	FALSE	Protein phosphatase 1 regulatory subunit 7 OS=Mus musculus OX=10090 GN=Ppp1r7 PE=1 SV=2	60	16	93	16	77.94	264.87	16	41.3	1.45157e+06	1.04064e+07	8.90066e+06	5.28766e+06	1.60904e+06	2.00683e+07	2.72323e+06	4.85825e+06	4.4396e+06	1.76955e+07	6.04822e+06	8	13	13	12	8	14	9	12	11	14	13	8	13	13	12	8	14	9	12	11	14	13
Q61112	20318	Sdf4	FALSE	45 kDa calcium-binding protein OS=Mus musculus OX=10090 GN=Sdf4 PE=1 SV=1	63	16	92	16	68.928	234.42	16	42	9.88146e+06	1.50457e+07	1.43455e+07	1.69905e+07	1.38646e+07	1.19638e+07	1.24739e+07	1.44703e+07	2.44377e+07	1.82392e+07	2.47678e+07	15	14	13	14	12	13	14	11	15	15	15	15	14	13	14	12	13	14	11	15	15	15
Q8BHC0	114332	Lyve1	FALSE	Lymphatic vessel endothelial hyaluronic acid receptor 1 OS=Mus musculus OX=10090 GN=Lyve1 PE=1 SV=1	26	11	92	11	49.807	214.41	11	34.6	5.84468e+06	5.31462e+06	4.63613e+06	8.16027e+06	8.39975e+06	1.25865e+07	9.06794e+06	1.08919e+07	6.59499e+07	2.08887e+07	1.74474e+07	7	7	6	8	8	8	9	8	11	9	9	7	7	6	8	8	8	9	8	11	9	9
Q9JJ89	108673	Ccdc86	FALSE	Coiled-coil domain-containing protein 86 OS=Mus musculus OX=10090 GN=Ccdc86 PE=1 SV=2	33	11	92	11	46.715	210.58	11	46.5	2.97548e+06	2.75022e+06	2.87642e+06	4.39898e+06	4.51288e+06	6.10019e+06	4.94008e+06	4.69244e+06	1.23456e+07	7.55224e+06	5.70013e+06	9	8	8	9	9	8	9	11	10	10	10	9	8	8	9	9	8	9	11	10	10	10
P61458	13180	Pcbd1	FALSE	Pterin-4-alpha-carbinolamine dehydratase OS=Mus musculus OX=10090 GN=Pcbd1 PE=1 SV=2	80	7	92	7	30.646	203.77	7	12	1.69093e+07	9.00925e+07	7.87172e+07	6.61757e+07	2.85228e+07	6.3635e+07	3.57886e+07	5.72245e+07	6.63217e+07	7.76249e+07	7.12428e+07	5	6	6	6	6	5	5	5	7	7	7	5	6	6	6	6	5	5	5	7	7	7
O88384	53612	Vti1b	FALSE	Vesicle transport through interaction with t-SNAREs homolog 1B OS=Mus musculus OX=10090 GN=Vti1b PE=1 SV=1	52	11	92	11	41.571	246.42	11	26.7	1.97922e+07	1.97343e+07	2.33029e+07	1.89252e+07	2.6499e+07	1.51792e+07	1.56775e+07	1.66949e+07	2.51066e+07	1.70877e+07	2.32051e+07	10	10	10	9	10	10	10	10	11	10	10	10	10	10	9	10	10	10	10	11	10	10
Q62318	21849	Trim28	FALSE	Transcription intermediary factor 1-beta OS=Mus musculus OX=10090 GN=Trim28 PE=1 SV=3	31	14	91	14	62.814	280.55	14	88.8	7.88953e+06	9.00421e+06	7.865e+06	9.07344e+06	7.11961e+06	1.00126e+07	7.87834e+06	1.0098e+07	1.5349e+07	1.45454e+07	1.18378e+07	10	12	12	11	10	11	10	12	11	13	10	10	12	12	11	10	11	10	12	11	13	10
P23198	12417	Cbx3	FALSE	Chromobox protein homolog 3 OS=Mus musculus OX=10090 GN=Cbx3 PE=1 SV=2	23	5	91	4	37.086	301.97	5	20.8	2.73694e+06	5.57168e+06	5.02301e+06	4.91698e+06	4.82391e+06	7.09052e+06	3.75066e+06	4.90511e+06	1.00879e+07	8.42292e+06	8.47149e+06	5	5	5	5	5	5	5	5	5	5	5	5	5	5	5	5	5	5	5	5	5	5
Q5PSV9	240087	Mdc1	FALSE	Mediator of DNA damage checkpoint protein 1 OS=Mus musculus OX=10090 GN=Mdc1 PE=1 SV=1	17	17	91	17	62.263	237.39	17	184.6	3.20604e+06	2.33353e+06	2.63579e+06	2.71682e+06	2.43772e+06	2.97883e+06	3.57596e+06	1.59018e+06	4.99274e+06	4.23543e+06	5.30747e+06	14	13	11	14	12	11	15	10	15	14	15	14	13	11	14	12	11	15	10	15	14	15
Q61129	12630	Cfi	FALSE	Complement factor I OS=Mus musculus OX=10090 GN=Cfi PE=1 SV=3	20	11	91	11	41.795	210.49	11	67.2	1.94438e+07	1.28081e+07	1.4586e+07	2.727e+07	1.95956e+07	2.91448e+07	1.45193e+07	2.51462e+07	1.95694e+07	2.46878e+07	2.57438e+07	11	11	11	11	11	11	11	11	10	10	10	11	11	11	11	11	11	11	11	10	10	10
Q9WVE8	23970	Pacsin2	FALSE	Protein kinase C and casein kinase substrate in neurons protein 2 OS=Mus musculus OX=10090 GN=Pacsin2 PE=1 SV=1	37	16	91	16	68.474	245.17	16	55.8	1.7098e+07	2.16214e+07	2.31089e+07	2.25018e+07	1.78654e+07	2.97193e+07	1.66764e+07	2.12603e+07	4.13644e+07	3.17564e+07	3.16388e+07	9	13	13	14	9	15	12	13	13	13	13	9	13	13	14	9	15	12	13	13	13	13
Q8K3C3	69151	Lzic	FALSE	Protein LZIC OS=Mus musculus OX=10090 GN=Lzic PE=1 SV=1	62	9	90	9	66.447	308.52	9	21.5	8.36126e+06	9.94924e+06	1.01556e+07	1.07278e+07	9.90988e+06	1.4245e+07	1.55203e+07	1.35281e+07	2.95824e+07	1.84234e+07	1.88202e+07	9	9	9	9	9	9	9	9	9	9	9	9	9	9	9	9	9	9	9	9	9	9
P61022	56398	Chp1	FALSE	Calcineurin B homologous protein 1 OS=Mus musculus OX=10090 GN=Chp1 PE=1 SV=2	65	10	90	10	42.143	261.11	10	22.4	3.68815e+06	9.09433e+06	9.13108e+06	8.6592e+06	5.75409e+06	1.17507e+07	8.28165e+06	9.53801e+06	2.28466e+07	22192266	1.50391e+07	9	10	10	9	9	10	10	10	10	10	9	9	10	10	9	9	10	10	10	10	10	9
Q9D7S9	76959	Chmp5	FALSE	Charged multivesicular body protein 5 OS=Mus musculus OX=10090 GN=Chmp5 PE=1 SV=1	47	10	90	10	56.446	290.48	10	24.6	1.77018e+07	1.47599e+07	1.21094e+07	1.56606e+07	1.8578e+07	9.3719e+06	1.49581e+07	1.44472e+07	2.73536e+07	1.57836e+07	2.55898e+07	8	8	7	7	7	6	8	7	10	8	9	8	8	7	7	7	6	8	7	10	8	9
P60840	56205	Ensa	FALSE	Alpha-endosulfine OS=Mus musculus OX=10090 GN=Ensa PE=1 SV=1	73	9	90	8	47.345	259.48	9	13.3	5.66329e+06	4.52589e+06	4.2409e+06	5.89699e+06	9.28443e+06	4.3675e+06	4.83528e+06	4.33913e+06	1.11541e+07	5.85682e+06	8.94934e+06	9	9	9	9	7	7	9	7	9	9	9	9	9	9	9	7	7	9	7	9	9	9
Q6PGH2	52009	Jpt2	FALSE	Jupiter microtubule associated homolog 2 OS=Mus musculus OX=10090 GN=Jpt2 PE=1 SV=1	64	8	90	8	55.981	270.21	8	20	2.84066e+07	2.47791e+07	1.91516e+07	2.79318e+07	3.68078e+07	1.93576e+07	2.49485e+07	2.05874e+07	6.63507e+07	3.24437e+07	5.68598e+07	8	8	7	7	7	8	8	8	8	8	8	8	8	7	7	7	8	8	8	8	8	8
P97434	26936	Mprip	FALSE	Myosin phosphatase Rho-interacting protein OS=Mus musculus OX=10090 GN=Mprip PE=1 SV=2	22	17	89	17	68.608	260.26	17	116.3	5.46486e+06	5.06543e+06	3.78191e+06	4.49139e+06	4.81411e+06	5.61789e+06	4.25773e+06	3.57364e+06	4.29456e+06	4.28256e+06	5.55946e+06	16	16	14	16	15	16	17	15	14	14	14	16	16	14	16	15	16	17	15	14	14	14
P63323	20042	Rps12	FALSE	40S ribosomal protein S12 OS=Mus musculus OX=10090 GN=Rps12 PE=1 SV=2	60	7	89	7	49.319	268.22	7	14.5	2.88831e+07	4.96514e+07	5.02371e+07	5.3586e+07	3.87379e+07	5.9634e+07	3.05329e+07	3.98609e+07	6.00091e+07	5.93788e+07	4.95936e+07	6	7	7	7	6	7	6	5	7	6	6	6	7	7	7	6	7	6	5	7	6	6
O89020	280662	Afm	FALSE	Afamin OS=Mus musculus OX=10090 GN=Afm PE=1 SV=2	36	18	89	18	72.33	206.09	18	69.3	3.11789e+06	1.44679e+07	1.32304e+07	2.5256e+07	2.831e+06	2.73592e+07	6.24357e+06	1.21691e+07	1.25647e+07	2.07867e+07	1.36029e+07	9	15	13	17	8	15	10	11	8	11	13	9	15	13	17	8	15	10	11	8	11	13
Q5SX40	17879	Myh1	FALSE	Myosin-1 OS=Mus musculus OX=10090 GN=Myh1 PE=1 SV=1	33	65	89	17	279.754	281.75	65	223.2	179479	155142	44473.3	125316	42355.9	3.88232e+07					48313	7	6	4	6	6	65	6	3	3	8	4	7	6	4	6	6	65	6	3	3	8	4
Q06770	12401	Serpina6	FALSE	Corticosteroid-binding globulin OS=Mus musculus OX=10090 GN=Serpina6 PE=1 SV=1	39	13	89	13	68.45	287.29	13	44.7	2.07818e+06	2.32277e+07	2.73515e+07	3.17714e+07	3.5987e+06	1.04897e+07	2.39586e+06	7.48539e+06	1.49431e+07	1.01765e+07	2.97738e+07	7	13	13	13	8	10	7	10	12	11	13	7	13	13	13	8	10	7	10	12	11	13
P59759	239719	Mrtfb	FALSE	Myocardin-related transcription factor B OS=Mus musculus OX=10090 GN=Mrtfb PE=1 SV=1	25	17	89	17	72.266	261.18	17	117.5	8.30111e+06	6.08519e+06	4.8405e+06	5.20301e+06	9.15453e+06	4.78747e+06	8.26333e+06	8.43807e+06	1.2932e+07	9.15627e+06	1.17868e+07	14	15	13	13	15	11	15	15	16	15	15	14	15	13	13	15	11	15	15	16	15	15
Q8CH25	66660	Sltm	FALSE	SAFB-like transcription modulator OS=Mus musculus OX=10090 GN=Sltm PE=1 SV=1	20	17	89	17	78.478	272.85	17	116.9	8.00082e+06	4.74544e+06	4.46988e+06	6.04266e+06	8.66453e+06	3.49545e+06	4.93603e+06	4.94758e+06	1.0924e+07	5.95065e+06	1.02702e+07	14	12	12	15	16	12	12	12	13	11	15	14	12	12	15	16	12	12	12	13	11	15
Q5NBX1	12808	Cobl	FALSE	Protein cordon-bleu OS=Mus musculus OX=10090 GN=Cobl PE=1 SV=1	22	21	89	21	78.555	254.61	21	143.8	7.1584e+06	3.61048e+06	2.86456e+06	2.70328e+06	6.65136e+06	4.88481e+06	1.01282e+07	1.03162e+07	6.8321e+06	7.13069e+06	8.40423e+06	19	16	15	14	20	16	20	18	16	18	19	19	16	15	14	20	16	20	18	16	18	19
P70297	20844	Stam	FALSE	Signal transducing adapter molecule 1 OS=Mus musculus OX=10090 GN=Stam PE=1 SV=3	29	11	88	10	55.496	262.1	11	59.7	3.27013e+06	7.28058e+06	9.96258e+06	7.83148e+06	4.18938e+06	1.27561e+07	7.37061e+06	1.05031e+07	1.63664e+07	1.74946e+07	1.08362e+07	8	10	10	10	9	10	11	10	11	11	11	8	10	10	10	9	10	11	10	11	11	11
Q3TQI7	227707	BC005624	FALSE	Telomere length and silencing protein 1 homolog OS=Mus musculus OX=10090 PE=1 SV=2	48	12	88	12	52.557	235.28	12	33.5	8.22677e+06	8.07744e+06	6.691e+06	8.25082e+06	1.12741e+07	3.73706e+06	7.47631e+06	6.3007e+06	1.28046e+07	7642877	1.16395e+07	11	10	9	10	10	9	9	10	10	10	11	11	10	9	10	10	9	9	10	10	10	11
Q3THK3	98053	Gtf2f1	FALSE	General transcription factor IIF subunit 1 OS=Mus musculus OX=10090 GN=Gtf2f1 PE=1 SV=2	31	14	88	14	60.476	239.96	14	57.2	3.76352e+06	3.50955e+06	3.71557e+06	2.64303e+06	5.99712e+06	4.66776e+06	2.38274e+06	4.09656e+06	1.31542e+07	9.21975e+06	7.60497e+06	12	12	12	11	14	12	12	12	14	14	14	12	12	12	11	14	12	12	12	14	14	14
Q91W92	104445	Cdc42ep1	FALSE	Cdc42 effector protein 1 OS=Mus musculus OX=10090 GN=Cdc42ep1 PE=1 SV=1	41	11	88	11	57.779	220.87	11	43.1	3.16678e+06	4.56854e+06	4.637e+06	4.099e+06	5.72083e+06	5.49738e+06	4.00489e+06	6.23922e+06	8.78705e+06	5.47851e+06	6.45778e+06	9	10	11	9	11	10	9	11	9	10	9	9	10	11	9	11	10	9	11	9	10	9
P32848	19293	Pvalb	FALSE	Parvalbumin alpha OS=Mus musculus OX=10090 GN=Pvalb PE=1 SV=3	75	14	88	14	69.841	236.73	14	11.9	7.17956e+06	2.59094e+07	1.59613e+07	1.38467e+07	4.54123e+06	4.71539e+08	8.79536e+06	1.40669e+07	2.80666e+07	3.12922e+07	2.01019e+07	7	8	4	8	6	14	7	8	7	10	7	7	8	4	8	6	14	7	8	7	10	7
O35551	54189	Rabep1	FALSE	Rab GTPase-binding effector protein 1 OS=Mus musculus OX=10090 GN=Rabep1 PE=1 SV=2	29	22	88	22	74.971	218.6	22	99.5	4.3558e+06	1.00648e+07	9.90962e+06	9.29046e+06	3.57914e+06	1.47566e+07	9.55801e+06	1.13509e+07	1.1957e+07	1.71856e+07	1.40416e+07	16	21	20	19	12	22	21	20	18	21	18	16	21	20	19	12	22	21	20	18	21	18
P68037	22195	Ube2l3	FALSE	Ubiquitin-conjugating enzyme E2 L3 OS=Mus musculus OX=10090 GN=Ube2l3 PE=1 SV=1	70	9	88	9	43.807	269.79	9	17.9	1.8276e+07	3.45332e+07	2.45768e+07	2.67609e+07	2.08881e+07	3.60741e+07	1.93135e+07	2.69015e+07	33605487	3.87394e+07	3.22493e+07	9	9	9	9	8	9	9	9	9	9	9	9	9	9	9	8	9	9	9	9	9	9
P31230	13722	Aimp1	FALSE	Aminoacyl tRNA synthase complex-interacting multifunctional protein 1 OS=Mus musculus OX=10090 GN=Aimp1 PE=1 SV=2	70	14	88	14	70.39	260.83	14	34	4.37679e+06	1.2951e+07	1.30714e+07	8.73613e+06	5.47185e+06	1.33404e+07	4.83476e+06	8.27206e+06	1.3959e+07	1.89747e+07	1.15291e+07	10	13	12	13	11	14	11	11	12	12	12	10	13	12	13	11	14	11	11	12	12	12
Q6NZB0	68598	Dnajc8	FALSE	DnaJ homolog subfamily C member 8 OS=Mus musculus OX=10090 GN=Dnajc8 PE=1 SV=2	54	10	87	10	47.229	254.87	10	29.8	8.54677e+06	9830531	8.45371e+06	1.00589e+07	1.24165e+07	1.02341e+07	1.40319e+07	1.3098e+07	3.52999e+07	1.67001e+07	2.04482e+07	8	8	9	9	9	9	10	9	10	10	10	8	8	9	9	9	9	10	9	10	10	10
P09803	12550	Cdh1	FALSE	Cadherin-1 OS=Mus musculus OX=10090 GN=Cdh1 PE=1 SV=1	28	13	87	13	66.626	276.8	13	98.2	4.31404e+06	8.73103e+06	1.17995e+07	8.85203e+06	4.83977e+06	2.50378e+07	7.46992e+06	7.39102e+06	2.32598e+07	1.87565e+07	1.15941e+07	11	11	13	11	9	12	10	8	12	11	10	11	11	13	11	9	12	10	8	12	11	10
Q9Z204	15381	Hnrnpc	FALSE	Heterogeneous nuclear ribonucleoproteins C1/C2 OS=Mus musculus OX=10090 GN=Hnrnpc PE=1 SV=1	27	10	87	10	48.352	243.14	10	34.4	2.27575e+07	1.71594e+07	1.29618e+07	1.54599e+07	1.96161e+07	1.61309e+07	1.58606e+07	1.62057e+07	2.69599e+07	2.68802e+07	3.43132e+07	9	9	8	8	8	9	9	9	8	10	9	9	9	8	8	8	9	9	9	8	10	9
Q9D2G2	78920	Dlst	TRUE	Dihydrolipoyllysine-residue succinyltransferase component of 2-oxoglutarate dehydrogenase complex, mitochondrial OS=Mus musculus OX=10090 GN=Dlst PE=1 SV=1	26	10	87	10	39.801	222.48	10	49	2.65566e+07	1.38031e+07	1.82783e+07	1.62545e+07	3.00504e+07	2.85874e+07	34453643	4.85463e+07	6.88197e+07	5.81084e+07	5.94845e+07	6	8	8	7	6	8	8	8	9	9	8	6	8	8	7	6	8	8	8	9	9	8
Q9EQS3	56309	Mycbp	FALSE	c-Myc-binding protein OS=Mus musculus OX=10090 GN=Mycbp PE=1 SV=5	75	10	87	10	39.586	231.4	10	12	2.42804e+07	2.29586e+07	2.3434e+07	2.87641e+07	3.74778e+07	2.21717e+07	2.14829e+07	2.50055e+07	4.2686e+07	2.72061e+07	3.75481e+07	10	10	10	10	10	10	10	10	10	10	10	10	10	10	10	10	10	10	10	10	10	10
Q6P6J9	69672	Txndc15	FALSE	Thioredoxin domain-containing protein 15 OS=Mus musculus OX=10090 GN=Txndc15 PE=1 SV=1	42	9	87	9	59.011	266.13	9	38.1	1.03121e+07	1.15294e+07	1.37704e+07	1.44209e+07	1.61348e+07	6.17053e+06	4.62779e+06	5.46273e+06	9.66833e+06	5.17356e+06	1.20652e+07	7	8	8	9	9	7	6	6	7	6	7	7	8	8	9	9	7	6	6	7	6	7
Q62093	20382	Srsf2	FALSE	Serine/arginine-rich splicing factor 2 OS=Mus musculus OX=10090 GN=Srsf2 PE=1 SV=4	27	5	87	5	35.939	247.99	5	25.5	5.49186e+07	3.37343e+07	3.3057e+07	3.59392e+07	5.84496e+07	3.01991e+07	3.1649e+07	3.2054e+07	5.38156e+07	3.65045e+07	5.9204e+07	5	5	5	5	5	5	5	5	5	5	5	5	5	5	5	5	5	5	5	5	5	5
Q9CWZ3	60365	Rbm8a	FALSE	RNA-binding protein 8A OS=Mus musculus OX=10090 GN=Rbm8a PE=1 SV=4	61	7	86	7	44.463	245.85	7	19.9	7.55947e+06	1.01171e+07	1.00008e+07	9.39356e+06	8.32819e+06	1.31687e+07	9.35416e+06	1.0829e+07	1.50295e+07	1.4717e+07	1.42233e+07	6	6	6	7	6	7	7	6	7	7	7	6	6	6	7	6	7	7	6	7	7	7
P17095	15361	Hmga1	FALSE	High mobility group protein HMG-I/HMG-Y OS=Mus musculus OX=10090 GN=Hmga1 PE=1 SV=4	56	7	86	7	35.837	249.98	7	11.6	2.39357e+07	2.43196e+07	1.87934e+07	3.26684e+07	3.13866e+07	3.01e+07	2.60784e+07	2.66499e+07	3.98401e+07	3.96301e+07	3.47474e+07	7	7	7	7	7	7	7	7	6	7	7	7	7	7	7	7	7	7	7	6	7	7
Q61233	18826	Lcp1	FALSE	Plastin-2 OS=Mus musculus OX=10090 GN=Lcp1 PE=1 SV=4	30	14	86	11	57.727	222.3	14	70.1	8.0749e+06	9.39149e+06	8.56562e+06	1.14582e+07	8.44966e+06	1.19237e+07	7.05243e+06	1.17629e+07	4.47794e+06	1.26132e+07	1.3974e+07	7	12	12	10	6	13	7	11	6	13	11	7	12	12	10	6	13	7	11	6	13	11
Q9CQK7	66521	Rwdd1	FALSE	RWD domain-containing protein 1 OS=Mus musculus OX=10090 GN=Rwdd1 PE=1 SV=1	43	11	86	11	54.331	242.7	11	27.8	4.06704e+06	8.60728e+06	7.40479e+06	7.80096e+06	6.22389e+06	1.00868e+07	5.94519e+06	6.70129e+06	1.4952e+07	9.6134e+06	1.14523e+07	9	10	10	9	10	10	10	10	11	11	11	9	10	10	9	10	10	10	10	11	11	11
Q69ZZ6	330401	Tmcc1	FALSE	Transmembrane and coiled-coil domains protein 1 OS=Mus musculus OX=10090 GN=Tmcc1 PE=1 SV=2	31	14	86	12	62.068	262.19	14	71.6	8.55204e+06	5.58035e+06	6.52627e+06	5.71572e+06	1.04935e+07	4.68061e+06	3.98751e+06	5.45487e+06	5.68538e+06	4.65876e+06	7896108	14	13	13	12	12	11	10	11	8	11	11	14	13	13	12	12	11	10	11	8	11	11
Q9JHS9	66070	Cwc15	FALSE	Spliceosome-associated protein CWC15 homolog OS=Mus musculus OX=10090 GN=Cwc15 PE=1 SV=1	46	12	86	12	48.258	219.39	12	26.6	1.55521e+07	9.31674e+06	9.3067e+06	1.14365e+07	1.65916e+07	6.68019e+06	1.03305e+07	9.80952e+06	2.922e+07	1.22186e+07	2.0704e+07	11	9	10	11	11	9	10	10	12	12	12	11	9	10	11	11	9	10	10	12	12	12
Q8BKX1	108100	Baiap2	FALSE	Brain-specific angiogenesis inhibitor 1-associated protein 2 OS=Mus musculus OX=10090 GN=Baiap2 PE=1 SV=2	38	15	86	15	61.013	232.33	15	59.2	3.79945e+06	9.17696e+06	9.35291e+06	6.73014e+06	4.1278e+06	7.72342e+06	5.03219e+06	9.14289e+06	8.97077e+06	1.07861e+07	1.01665e+07	8	14	14	14	10	13	13	14	14	15	13	8	14	14	14	10	13	13	14	14	15	13
E9Q555	672511	Rnf213	FALSE	E3 ubiquitin-protein ligase RNF213 OS=Mus musculus OX=10090 GN=Rnf213 PE=1 SV=3	3	12	86	12	48.845	226.56	12	583.9	1.25526e+07	1.05651e+07	8.90791e+06	1.35385e+07	1.18155e+07	9.46172e+06	8.50838e+06	1.09824e+07	1.35237e+07	1.28561e+07	20245716	10	11	10	11	11	10	11	11	12	11	11	10	11	10	11	11	10	11	11	12	11	11
Q5ND29	280408	Rilp	FALSE	Rab-interacting lysosomal protein OS=Mus musculus OX=10090 GN=Rilp PE=1 SV=1	49	17	86	16	68.271	242.05	17	41.1	1.68382e+06	8.36689e+06	8937664	6.21004e+06	2.88657e+06	7.61209e+06	3.95098e+06	6.87711e+06	7.32776e+06	7.76747e+06	7.21917e+06	8	13	13	12	9	12	12	14	13	13	13	8	13	13	12	9	12	12	14	13	13	13
P15105	14645	Glul	FALSE	Glutamine synthetase OS=Mus musculus OX=10090 GN=Glul PE=1 SV=6	34	13	86	13	55.053	256.54	13	42.1	3.57218e+07	4.4464e+07	4.78902e+07	6.63868e+07	4.58433e+07	4.24717e+06	4.07391e+06	3.22196e+06	7.49326e+06	1.64209e+07	3.999e+07	13	13	13	13	13	9	8	7	9	12	13	13	13	13	13	13	9	8	7	9	12	13
Q8BWW4	207214	Larp4	FALSE	La-related protein 4 OS=Mus musculus OX=10090 GN=Larp4 PE=1 SV=2	27	16	85	16	53.424	221.05	16	79.7	1.67815e+07	1.14152e+07	1.0512e+07	1.02822e+07	1.81974e+07	1.04116e+07	1.23987e+07	1.19516e+07	1.7878e+07	1.59529e+07	1.88754e+07	12	14	13	13	12	13	11	13	13	13	15	12	14	13	13	12	13	11	13	13	13	15
Q9CR21	70316	Ndufab1	TRUE	Acyl carrier protein, mitochondrial OS=Mus musculus OX=10090 GN=Ndufab1 PE=1 SV=1	28	8	85	8	48.037	249.87	8	17.4	2.00362e+07	3.26159e+07	2.58941e+07	3.90175e+07	2.96613e+07	9.39105e+07	6.37776e+07	9.01449e+07	1.73444e+08	1.29051e+08	7.43879e+07	4	4	4	4	4	5	7	6	8	6	6	4	4	4	4	4	5	7	6	8	6	6
Q8VEK3	51810	Hnrnpu	FALSE	Heterogeneous nuclear ribonucleoprotein U OS=Mus musculus OX=10090 GN=Hnrnpu PE=1 SV=1	12	9	85	9	37.276	278.06	9	87.9	1.83585e+07	1.43676e+07	1.14404e+07	1.76667e+07	2.02444e+07	9.85613e+06	1.20568e+07	1.13788e+07	2.3484e+07	1.80475e+07	2.78377e+07	9	9	8	9	9	6	8	8	8	8	9	9	9	8	9	9	6	8	8	8	8	9
Q61189	12729	Clns1a	FALSE	Methylosome subunit pICln OS=Mus musculus OX=10090 GN=Clns1a PE=1 SV=1	53	7	84	7	52.253	271.48	7	26	9.79211e+06	9.37915e+06	1.01172e+07	1.14468e+07	1.0527e+07	1.18091e+07	1.36479e+07	1.26402e+07	3.15824e+07	2.09525e+07	1.99378e+07	6	7	7	7	7	6	7	7	7	7	7	6	7	7	7	7	6	7	7	7	7	7
P10852	17254	Slc3a2	FALSE	4F2 cell-surface antigen heavy chain OS=Mus musculus OX=10090 GN=Slc3a2 PE=1 SV=1	40	16	84	16	57.667	224.46	16	58.3	2.77204e+06	9.85886e+06	1.02319e+07	8.21908e+06	4.32892e+06	2.26531e+07	1.19859e+07	1.97471e+07	2.9877e+07	2.44267e+07	1.53322e+07	8	13	13	14	11	14	14	14	16	15	15	8	13	13	14	11	14	14	14	16	15	15
Q8BQ47	66455	Cnpy4	FALSE	Protein canopy homolog 4 OS=Mus musculus OX=10090 GN=Cnpy4 PE=1 SV=1	42	10	84	10	50.703	258.76	10	28.1	8.25683e+06	9.54513e+06	9.70767e+06	1.24279e+07	1.08318e+07	9.74561e+06	1.30449e+07	7.9315e+06	3.77215e+07	1.1629e+07	2.39596e+07	9	10	10	10	9	9	10	9	10	10	10	9	10	10	10	9	9	10	9	10	10	10
Q8BFR4	75612	Gns	FALSE	N-acetylglucosamine-6-sulfatase OS=Mus musculus OX=10090 GN=Gns PE=1 SV=1	28	14	84	14	55.971	212.22	14	61.1	5.99372e+06	1.05992e+07	1.19014e+07	1.1299e+07	8.21739e+06	1.49242e+07	9.75754e+06	1.26341e+07	2.42188e+07	21136985	1.5683e+07	10	11	12	12	10	13	12	11	12	11	11	10	11	12	12	10	13	12	11	12	11	11
P97351	20091	Rps3a1	FALSE	40S ribosomal protein S3a OS=Mus musculus OX=10090 GN=Rps3a PE=1 SV=3	39	12	84	12	50.804	191.61	12	29.9	3.43078e+06	8.87748e+06	9.13894e+06	8.33976e+06	6.12874e+06	7.43042e+06	3.44586e+06	7.93012e+06	1.28326e+07	1.18825e+07	8.0255e+06	7	12	11	11	8	8	9	11	10	12	10	7	12	11	11	8	8	9	11	10	12	10
Q6PIU9	102637099	No ID	FALSE	Uncharacterized protein FLJ45252 homolog OS=Mus musculus OX=10090 PE=1 SV=2	54	11	84	11	57.732	234.21	11	37.7	9.84504e+06	7.44917e+06	6.28966e+06	6.87435e+06	8.84761e+06	6.89171e+06	7.51275e+06	6.94639e+06	1.07103e+07	1.10446e+07	1.25765e+07	11	10	10	9	11	9	10	8	9	10	10	11	10	10	9	11	9	10	8	9	10	10
Q9CWK8	67804	Snx2	FALSE	Sorting nexin-2 OS=Mus musculus OX=10090 GN=Snx2 PE=1 SV=2	46	19	84	17	89.212	233.13	19	58.4	1.51139e+06	2.28721e+07	2.26288e+07	1.71642e+07	2.44882e+06	2.79692e+07	6.04235e+06	1.65344e+07	1.72166e+07	3.62834e+07	1.88837e+07	6	19	19	18	9	19	16	17	16	19	17	6	19	19	18	9	19	16	17	16	19	17
Q65Z40	218914	Wapl	FALSE	Wings apart-like protein homolog OS=Mus musculus OX=10090 GN=Wapl PE=1 SV=2	14	14	84	14	59.154	236.05	14	134	5.80547e+06	5.37092e+06	4.18321e+06	5.17692e+06	6.95468e+06	2.94438e+06	3.66806e+06	4.1868e+06	5.74871e+06	4.6982e+06	7.18316e+06	14	14	14	14	14	12	13	12	12	13	14	14	14	14	14	14	12	13	12	12	13	14
Q8R0A0	68705	Gtf2f2	FALSE	General transcription factor IIF subunit 2 OS=Mus musculus OX=10090 GN=Gtf2f2 PE=1 SV=1	54	11	84	11	37.572	204.6	11	28.4	2.70908e+06	3.51945e+06	3.50402e+06	2.91084e+06	4.50237e+06	3.50553e+06	3.63685e+06	3.88882e+06	9.14841e+06	7.39724e+06	5.71585e+06	9	11	10	9	11	9	11	11	11	11	10	9	11	10	9	11	9	11	11	11	11	10
Q80XU3	98415	Nucks1	FALSE	Nuclear ubiquitous casein and cyclin-dependent kinase substrate 1 OS=Mus musculus OX=10090 GN=Nucks1 PE=1 SV=1	34	12	84	12	57.057	250.97	12	26.3	4.66029e+07	2.8744e+07	2.23897e+07	3.27458e+07	6.48988e+07	2.44247e+07	3.31449e+07	3.71029e+07	7.17967e+07	3.93349e+07	5.332e+07	9	8	8	9	10	6	9	11	11	10	9	9	8	8	9	10	6	9	11	11	10	9
Q99K30	98845	Eps8l2	FALSE	Epidermal growth factor receptor kinase substrate 8-like protein 2 OS=Mus musculus OX=10090 GN=Eps8l2 PE=1 SV=1	27	13	84	13	59.837	250.8	13	82.2	2.76559e+06	4.38019e+06	2.79028e+06	2.08218e+06	3.21464e+06	8.03701e+06	5.17409e+06	6.69317e+06	7.46359e+06	1.2243e+07	5.56927e+06	8	12	9	7	9	12	11	11	9	12	11	8	12	9	7	9	12	11	11	9	12	11
Q91VM5	19656	Rbmxl1	FALSE	RNA binding motif protein, X-linked-like-1 OS=Mus musculus OX=10090 GN=Rbmxl1 PE=2 SV=1	33	14	84	14	41.791	149.22	14	42.1	6.25188e+06	9.34187e+06	7.7134e+06	7.25256e+06	5.27229e+06	8.69174e+06	6.27321e+06	8.61997e+06	1.33702e+07	1.35671e+07	1.02972e+07	14	13	13	14	12	14	13	14	14	14	14	14	13	13	14	12	14	13	14	14	14	14
Q80U49	217882	Cep170b	FALSE	Centrosomal protein of 170 kDa protein B OS=Mus musculus OX=10090 GN=Cep170b PE=1 SV=2	17	20	84	19	65.37	226.43	20	170.7	4.50969e+06	2.80547e+06	2.43918e+06	2.44766e+06	3.85159e+06	2.75338e+06	3.55315e+06	2.8345e+06	4.35424e+06	3.2954e+06	4.12799e+06	19	18	15	12	15	16	19	16	15	14	15	19	18	15	12	15	16	19	16	15	14	15
Q9D7P6	66383	Iscu	TRUE	Iron-sulfur cluster assembly enzyme ISCU, mitochondrial OS=Mus musculus OX=10090 GN=Iscu PE=1 SV=1	51	9	83	9	40.67	205.2	9	18.1	1.44033e+07	1.17971e+07	1.25828e+07	1.41955e+07	2.262e+07	2.50104e+07	2.26789e+07	2.5562e+07	3.39361e+07	2.43465e+07	2.53496e+07	8	8	8	8	8	8	8	8	9	8	8	8	8	8	8	8	8	8	8	9	8	8
Q9CWZ7	108123	Napg	FALSE	Gamma-soluble NSF attachment protein OS=Mus musculus OX=10090 GN=Napg PE=1 SV=1	47	14	83	14	50.255	212.04	14	34.7	2.97682e+06	9.79653e+06	1.0925e+07	7446094	5.14732e+06	1.96055e+07	9.62301e+06	1.49074e+07	2.13705e+07	2.20739e+07	1.40954e+07	11	12	12	13	13	13	12	13	14	14	13	11	12	12	13	13	13	12	13	14	14	13
Q7TPM1	227723	Prrc2b	FALSE	Protein PRRC2B OS=Mus musculus OX=10090 GN=Prrc2b PE=1 SV=1	21	23	83	20	79.422	233.23	23	160.8	5.12255e+06	3.20554e+06	2.96558e+06	2.99221e+06	4.86895e+06	2.71054e+06	5.2918e+06	3.76546e+06	9.00906e+06	6.43105e+06	6.93747e+06	20	19	19	19	19	15	21	17	21	20	20	20	19	19	19	19	15	21	17	21	20	20
P15626	14863	Gstm2	FALSE	Glutathione S-transferase Mu 2 OS=Mus musculus OX=10090 GN=Gstm2 PE=1 SV=2	64	15	83	7	65.016	227.34	15	25.7	105583	5.68258e+06	6.14755e+06	4.34259e+06	1.45505e+06	5.64434e+06	1.14411e+06	1.9812e+06	2.94278e+06	6.15221e+06	3.95552e+06	4	14	14	14	7	15	10	12	12	14	13	4	14	14	14	7	15	10	12	12	14	13
Q9D9K3	74268	Aven	FALSE	Cell death regulator Aven OS=Mus musculus OX=10090 GN=Aven PE=1 SV=2	54	11	83	11	55.266	244.71	11	37.2	1.09291e+07	8.83713e+06	9.19307e+06	9.09381e+06	1.11002e+07	5.54198e+06	9.0861e+06	7.68406e+06	16539737	1.0641e+07	1.50076e+07	11	10	10	10	11	9	10	10	11	10	10	11	10	10	10	11	9	10	10	11	10	10
Q01279	13649	Egfr	FALSE	Epidermal growth factor receptor OS=Mus musculus OX=10090 GN=Egfr PE=1 SV=1	16	13	82	13	60.114	252.99	13	134.8	2.16772e+07	1.10267e+07	7.09451e+06	1.48898e+07	2.19646e+07	1.2038e+07	5.72338e+06	8.25321e+06	3.0754e+06	1.26871e+06	5.96856e+06	12	11	11	12	11	11	11	11	9	7	9	12	11	11	12	11	11	11	11	9	7	9
P10126	13627	Eef1a1	FALSE	Elongation factor 1-alpha 1 OS=Mus musculus OX=10090 GN=Eef1a1 PE=1 SV=3	25	8	82	8	41.043	258	8	50.1	1.58657e+07	1.91212e+07	2.49919e+07	1.95711e+07	2.17001e+07	1.7426e+07	9.82844e+06	1.27135e+07	2.13335e+07	19078645	2.34877e+07	7	7	8	7	7	7	6	7	7	6	7	7	7	8	7	7	7	6	7	7	6	7
P83741	232341	Wnk1	FALSE	Serine/threonine-protein kinase WNK1 OS=Mus musculus OX=10090 GN=Wnk1 PE=1 SV=2	8	14	82	14	49.026	195.2	14	250.8	9.68791e+06	6.6008e+06	6.81343e+06	1.02781e+07	1.25855e+07	9.32891e+06	1.06687e+07	1.11168e+07	16391869	1.00397e+07	1.50868e+07	13	12	12	13	13	9	13	13	11	12	13	13	12	12	13	13	9	13	13	11	12	13
P35831	19248	Ptpn12	FALSE	Tyrosine-protein phosphatase non-receptor type 12 OS=Mus musculus OX=10090 GN=Ptpn12 PE=1 SV=3	26	13	82	13	67.847	238.95	13	86.5	6.63953e+06	5.54532e+06	4.51869e+06	5.05722e+06	6.75216e+06	3.39983e+06	6.25942e+06	5.8002e+06	9.25144e+06	7.60288e+06	1.18657e+07	10	11	11	11	11	9	10	10	9	10	12	10	11	11	11	11	9	10	10	9	10	12
Q810V0	67973	Mphosph10	FALSE	U3 small nucleolar ribonucleoprotein protein MPP10 OS=Mus musculus OX=10090 GN=Mphosph10 PE=1 SV=2	31	15	82	15	66.88	231.61	15	78.7	3.54554e+06	3.15278e+06	2.91884e+06	2.69378e+06	3.6423e+06	5.84168e+06	8.1477e+06	6.58542e+06	1.73032e+07	1.15272e+07	6.71209e+06	12	11	11	11	11	11	13	12	14	12	12	12	11	11	11	11	11	13	12	14	12	12
Q8R0Y6	107747	Aldh1l1	TRUE	Cytosolic 10-formyltetrahydrofolate dehydrogenase OS=Mus musculus OX=10090 GN=Aldh1l1 PE=1 SV=1	23	16	82	16	65.675	219.64	16	98.6	5.15092e+06	1.4212e+07	1.6665e+07	1.22065e+07	9.90132e+06	7.44977e+06	4.65873e+06	6.53065e+06	5.28726e+06	7.45679e+06	1.0204e+07	11	16	16	14	14	13	10	13	11	14	14	11	16	16	14	14	13	10	13	11	14	14
Q9JK92	80888	Hspb8	FALSE	Heat shock protein beta-8 OS=Mus musculus OX=10090 GN=Hspb8 PE=1 SV=1	48	10	82	10	51.665	209.17	10	21.5	7.15192e+06	8.44632e+06	8.73307e+06	7.55398e+06	8.20976e+06	1.0741e+07	6.86937e+06	7.49691e+06	1.17749e+07	1.31522e+07	1.11257e+07	10	10	10	8	9	10	10	10	10	10	9	10	10	10	8	9	10	10	10	10	10	9
Q9QXY6	57440	Ehd3	FALSE	EH domain-containing protein 3 OS=Mus musculus OX=10090 GN=Ehd3 PE=1 SV=2	24	9	82	9	59.457	249.55	9	60.8	9.66015e+06	6.97195e+06	5.77605e+06	9.98396e+06	9.19157e+06	2.73489e+06	6.01684e+06	8.91244e+06	5.94471e+06	6.77272e+06	1.34209e+07	8	8	9	8	8	5	8	8	7	8	8	8	8	9	8	8	5	8	8	7	8	8
Q8BRV5	243219	2900026A02Rik	FALSE	Uncharacterized protein KIAA1671 OS=Mus musculus OX=10090 GN=Kiaa1671 PE=2 SV=1	34	10	82	10	41.086	209.45	10	34.6	7.26242e+06	5.33349e+06	5.38113e+06	4.70639e+06	7.70004e+06	2.18415e+06	3.63588e+06	4.97469e+06	5.3388e+06	3.53868e+06	6.18808e+06	10	10	10	10	10	7	9	10	10	7	10	10	10	10	10	10	7	9	10	10	7	10
Q283N4	231903	Urad	FALSE	2-oxo-4-hydroxy-4-carboxy-5-ureidoimidazoline decarboxylase OS=Mus musculus OX=10090 GN=Urad PE=1 SV=1	56	9	82	9	43.846	243.91	9	20	8.29801e+06	3.31044e+07	3.43053e+07	2.34368e+07	1.27924e+07	3.91871e+07	2.19193e+07	3.48213e+07	2.66194e+07	3.174e+07	2.27931e+07	8	9	9	9	9	9	9	9	9	9	9	8	9	9	9	9	9	9	9	9	9	9
Q9QZ23	56748	Nfu1	TRUE	NFU1 iron-sulfur cluster scaffold homolog, mitochondrial OS=Mus musculus OX=10090 GN=Nfu1 PE=1 SV=2	36	7	81	7	37.845	207.05	7	28.5	1.09782e+07	1.93934e+07	1.95449e+07	1.66671e+07	1.78091e+07	5.96217e+07	6.39729e+07	78051106	1.24469e+08	9.73949e+07	5.10939e+07	5	6	5	6	5	7	5	6	6	6	6	5	6	5	6	5	7	5	6	6	6	6
Q9DBS5	74764	Klc4	FALSE	Kinesin light chain 4 OS=Mus musculus OX=10090 GN=Klc4 PE=1 SV=1	35	17	81	16	62.423	236.25	17	68.6	1.40485e+06	7.5234e+06	8.6342e+06	4.78181e+06	1.93178e+06	7.86421e+06	2.5811e+06	5.63108e+06	6.09152e+06	9.44807e+06	5.79989e+06	7	16	17	14	9	15	11	13	11	15	12	7	16	17	14	9	15	11	13	11	15	12
Q9CR59	102060	Gadd45gip1	TRUE	Growth arrest and DNA damage-inducible proteins-interacting protein 1 OS=Mus musculus OX=10090 GN=Gadd45gip1 PE=1 SV=1	56	11	81	11	59.664	237.65	11	25.8	9.69433e+06	9.04104e+06	8.08385e+06	7.71119e+06	1.37743e+07	2.11162e+07	2.39691e+07	3.60211e+07	4.5796e+07	34119635	2.29257e+07	8	9	9	8	8	10	9	9	10	9	9	8	9	9	8	8	10	9	9	10	9	9
P11499	15516	Hsp90ab1	FALSE	Heat shock protein HSP 90-beta OS=Mus musculus OX=10090 GN=Hsp90ab1 PE=1 SV=3	27	15	81	9	69.109	258.82	15	83.2	5.445e+06	1.35842e+07	1.10289e+07	1.11564e+07	7.86409e+06	6.50325e+06	5.66738e+06	7.37862e+06	1.0472e+07	1.18248e+07	1.37949e+07	10	15	14	13	10	11	11	12	13	14	13	10	15	14	13	10	11	11	12	13	14	13
Q923D5	60321	Wbp11	FALSE	WW domain-binding protein 11 OS=Mus musculus OX=10090 GN=Wbp11 PE=1 SV=2	24	13	81	13	59.679	226.14	13	69.8	7.43551e+06	7.88981e+06	7.86528e+06	5.8973e+06	1.04802e+07	5.40958e+06	3.42622e+06	5.90497e+06	9.94978e+06	7.58686e+06	8.90849e+06	11	12	12	12	12	12	11	11	12	12	11	11	12	12	12	12	12	11	11	12	12	11
Q62313	22134	Tgoln1	FALSE	Trans-Golgi network integral membrane protein 1 OS=Mus musculus OX=10090 GN=Tgoln1 PE=1 SV=1	46	12	81	12	49.509	195.99	12	37.8	9.70675e+06	5.92501e+06	9.6415e+06	8.00098e+06	1.77592e+07	1.18228e+07	1.32258e+07	1.1338e+07	1.80252e+07	1.27003e+07	2.0735e+07	10	10	10	9	11	9	11	11	11	10	11	10	10	10	9	11	9	11	11	11	10	11
Q62417	20411	Sorbs1	FALSE	Sorbin and SH3 domain-containing protein 1 OS=Mus musculus OX=10090 GN=Sorbs1 PE=1 SV=2	15	17	81	17	60.981	217.78	17	143	7.46296e+06	5.64089e+06	4.30687e+06	5.61879e+06	8.17921e+06	5.85585e+06	6.6229e+06	7.25555e+06	9.82369e+06	8.52133e+06	1.04605e+07	12	11	10	12	13	13	13	13	15	14	14	12	11	10	12	13	13	13	13	15	14	14
Q9CYA0	76737	Creld2	FALSE	Protein disulfide isomerase Creld2 OS=Mus musculus OX=10090 GN=Creld2 PE=1 SV=1	37	13	81	13	53.601	184.27	13	38.2	2.94531e+07	1.79351e+07	1.85668e+07	3.07191e+07	2.64427e+07	1.41998e+07	9.91816e+06	7.83077e+06	2.03952e+07	1.09948e+07	2.52032e+07	10	12	9	13	13	12	9	10	10	8	10	10	12	9	13	13	12	9	10	10	8	10
Q8BJU0	52551	Sgta	FALSE	Small glutamine-rich tetratricopeptide repeat-containing protein alpha OS=Mus musculus OX=10090 GN=Sgta PE=1 SV=2	44	13	80	13	51.952	210.57	13	34.3	2.56506e+06	1.14458e+07	1.02807e+07	1.36755e+07	3.44035e+06	2.86633e+07	7.43644e+06	1.3089e+07	2.12504e+07	2.26779e+07	1.71297e+07	6	12	12	11	8	12	11	11	12	13	12	6	12	12	11	8	12	11	11	12	13	12
Q9QYC0	11518	Add1	FALSE	Alpha-adducin OS=Mus musculus OX=10090 GN=Add1 PE=1 SV=2	16	10	80	10	44.552	229.92	10	80.6	7.81281e+06	6.42407e+06	4.65221e+06	7.01593e+06	6.85403e+06	5.45884e+06	6.36092e+06	6.10467e+06	8.53859e+06	7.4837e+06	1.04067e+07	10	9	9	10	10	10	9	9	10	10	9	10	9	9	10	10	10	9	9	10	10	9
P14152	17449	Mdh1	FALSE	Malate dehydrogenase, cytoplasmic OS=Mus musculus OX=10090 GN=Mdh1 PE=1 SV=3	48	11	80	11	44.594	213.07	11	36.5	1.55871e+07	2.36878e+07	3.39802e+07	3.18911e+07	3.20997e+07	1.76981e+07	1.47543e+07	2.4218e+07	1.98952e+07	2.05684e+07	3.34542e+07	6	10	9	10	10	10	6	9	8	10	10	6	10	9	10	10	10	6	9	8	10	10
Q91WU0	234564	Ces1f	FALSE	Carboxylesterase 1F OS=Mus musculus OX=10090 GN=Ces1f PE=1 SV=1	36	13	80	9	65.305	231.83	13	61.6	1.17081e+07	1.64184e+07	1.56802e+07	1.38325e+07	2.06718e+07	4.4244e+06	4.86924e+06	8.08233e+06	5.2927e+06	6.74129e+06	1.62521e+07	11	12	12	10	10	9	9	10	9	9	10	11	12	12	10	10	9	9	10	9	9	10
Q8CEI1	78653	Bola3	TRUE	BolA-like protein 3 OS=Mus musculus OX=10090 GN=Bola3 PE=1 SV=1	43	7	80	7	40.354	255.38	7	12.2	6.71485e+06	6.27292e+06	5.98866e+06	7.58427e+06	8.82296e+06	1.06899e+07	1.50329e+07	1.56589e+07	1.80692e+07	1.66887e+07	1.26525e+07	5	5	5	5	6	5	7	6	6	6	6	5	5	5	5	6	5	7	6	6	6	6
Q3TGF2	66540	Fam107b	FALSE	Protein FAM107B OS=Mus musculus OX=10090 GN=Fam107b PE=1 SV=2	63	12	80	12	44.778	249.48	12	15.6	2.26146e+07	1.6905e+07	1.40474e+07	2.14893e+07	3.41167e+07	1.25577e+07	14380988	1.73945e+07	3.11811e+07	2.02379e+07	3.27042e+07	11	10	9	10	10	9	10	11	12	10	11	11	10	9	10	10	9	10	11	12	10	11
Q60854	20719	Serpinb6a	FALSE	Serpin B6 OS=Mus musculus OX=10090 GN=Serpinb6 PE=1 SV=1	43	15	80	15	70.15	180.02	15	42.6	9.24745e+06	4.78117e+06	5.69977e+06	6.5705e+06	6.27957e+06	3.54289e+06	4.633e+06	4.61636e+06	8.72057e+06	6.92333e+06	9.65814e+06	14	12	13	14	14	14	14	12	14	12	14	14	12	13	14	14	14	14	12	14	12	14
P30115	14859	Gsta3	FALSE	Glutathione S-transferase A3 OS=Mus musculus OX=10090 GN=Gsta3 PE=1 SV=2	47	10	80	6	36.396	224.81	10	25.3	2.32279e+07	4.08641e+07	4.13315e+07	2.95873e+07	4.17558e+07	2.05102e+07	1.49464e+07	2.48295e+07	2.02724e+07	1.8394e+07	2.84811e+07	9	9	10	9	9	9	8	9	9	9	9	9	9	10	9	9	9	8	9	9	9	9
O70492	54198	Snx3	FALSE	Sorting nexin-3 OS=Mus musculus OX=10090 GN=Snx3 PE=1 SV=3	67	10	80	8	33.229	199.96	10	18.7	2.40576e+06	7.05837e+06	6.97644e+06	6.04978e+06	4.28533e+06	11677124	3.61146e+06	6.55366e+06	9.95922e+06	1.58111e+07	8.91577e+06	7	10	10	9	9	10	10	10	10	10	10	7	10	10	9	9	10	10	10	10	10	10
P48024	20918	Eif1	FALSE	Eukaryotic translation initiation factor 1 OS=Mus musculus OX=10090 GN=Eif1 PE=1 SV=2	83	11	79	11	53.401	247.84	11	12.7	2.08115e+07	2.20561e+07	2.19506e+07	2.41337e+07	3.01423e+07	2.69934e+07	1.7765e+07	2.44673e+07	3.93247e+07	2.63461e+07	3.16668e+07	8	9	9	11	10	9	10	9	10	9	9	8	9	9	11	10	9	10	9	10	9	9
Q64374	19733	Rgn	FALSE	Regucalcin OS=Mus musculus OX=10090 GN=Rgn PE=1 SV=1	37	9	79	9	42.74	213.53	9	33.4	2.59154e+07	2.0347e+07	3.52018e+07	2.50819e+07	4.74304e+07	5.04056e+06	6.14316e+06	6.47566e+06	8.56282e+06	6.02639e+06	2.99554e+07	9	9	9	9	9	6	6	7	7	6	9	9	9	9	9	9	6	6	7	7	6	9
Q64442	20322	Sord	FALSE	Sorbitol dehydrogenase OS=Mus musculus OX=10090 GN=Sord PE=1 SV=3	35	10	79	10	60.258	264.94	10	38.2	3.53284e+07	3.56233e+07	4.24389e+07	4.83305e+07	6.3864e+07	1.77847e+07	2.127e+07	2.64518e+07	2.92079e+07	2.51998e+07	4.73465e+07	8	10	10	9	8	6	7	8	8	7	8	8	10	10	9	8	6	7	8	8	7	8
P97822	66471	Anp32e	FALSE	Acidic leucine-rich nuclear phosphoprotein 32 family member E OS=Mus musculus OX=10090 GN=Anp32e PE=1 SV=2	50	9	78	9	38.467	269.85	9	29.6	6.54777e+06	1.16942e+07	9.88132e+06	1.57658e+07	8.56006e+06	1.97408e+07	1.3324e+07	1.45469e+07	2.95238e+07	1.94853e+07	1.74049e+07	9	10	10	10	10	10	9	9	9	10	10	9	10	10	10	10	10	9	9	9	10	10
Q9CQU0	66073	Txndc12	FALSE	Thioredoxin domain-containing protein 12 OS=Mus musculus OX=10090 GN=Txndc12 PE=1 SV=1	54	5	78	5	33.886	237.76	5	19	4.63518e+06	1.13525e+07	1.14541e+07	9.91237e+06	7.2309e+06	18272766	1.01171e+07	1.18603e+07	2.32878e+07	1.9838e+07	1.89905e+07	4	5	4	5	4	5	5	5	5	5	5	4	5	4	5	4	5	5	5	5	5	5
Q9D8T7	380773	Slirp	TRUE	SRA stem-loop-interacting RNA-binding protein, mitochondrial OS=Mus musculus OX=10090 GN=Slirp PE=1 SV=2	62	7	78	7	42.353	230.74	7	12.6	8.02152e+06	1.30829e+07	1.33953e+07	1.09777e+07	1.49849e+07	2.47439e+07	1.78487e+07	3.22248e+07	3.29871e+07	3.36499e+07	2.64338e+07	6	6	6	6	6	6	6	6	7	6	6	6	6	6	6	6	6	6	6	7	6	6
O70439	53331	Stx7	FALSE	Syntaxin-7 OS=Mus musculus OX=10090 GN=Stx7 PE=1 SV=3	46	8	78	8	37.36	234.18	8	29.8	1.74057e+07	1.57761e+07	1.52461e+07	1.57318e+07	2.07333e+07	1.66312e+07	1.83841e+07	1.74052e+07	2.21218e+07	1.66463e+07	2.4908e+07	8	8	8	8	8	8	8	8	8	8	8	8	8	8	8	8	8	8	8	8	8	8
Q9Z0H8	269713	Clip2	FALSE	CAP-Gly domain-containing linker protein 2 OS=Mus musculus OX=10090 GN=Clip2 PE=1 SV=2	20	20	78	12	67.526	195.53	20	115.8	1.53878e+06	1.55496e+06	1.77911e+06	2.37651e+06	1.19474e+06	2.73183e+06	2.10668e+06	2.07491e+06	4.63578e+06	3.43821e+06	3.35029e+06	13	16	15	16	15	15	16	14	16	17	16	13	16	15	16	15	15	16	14	16	17	16
Q9QY24	58203	Zbp1	FALSE	Z-DNA-binding protein 1 OS=Mus musculus OX=10090 GN=Zbp1 PE=1 SV=1	48	12	78	12	72.064	255.77	12	44.3	4.17476e+06	7.87863e+06	7.76606e+06	7.30717e+06	2.5329e+06	1.67038e+06	1.19946e+06	1.19409e+06	2.97273e+06	2.43302e+06	1.79859e+07	9	11	11	10	6	6	5	5	7	6	12	9	11	11	10	6	6	5	5	7	6	12
P08101	14130	Fcgr2b	FALSE	Low affinity immunoglobulin gamma Fc region receptor II OS=Mus musculus OX=10090 GN=Fcgr2 PE=1 SV=2	22	6	78	6	25.283	226.8	6	36.7	8.89748e+06	1.60418e+07	2.49074e+07	1.94215e+07	1.3936e+07	2.12965e+07	1.56521e+07	1.95459e+07	3.38047e+07	2.74894e+07	2.81048e+07	6	6	6	6	6	6	6	6	6	6	6	6	6	6	6	6	6	6	6	6	6	6
Q61425	15107	Hadh	TRUE	Hydroxyacyl-coenzyme A dehydrogenase, mitochondrial OS=Mus musculus OX=10090 GN=Hadh PE=1 SV=2	45	10	78	10	63.882	230.1	10	34.4	4.69652e+06	7.66354e+06	1.03741e+07	7.95579e+06	6.58611e+06	1.34182e+07	1.00942e+07	1.50534e+07	2.5246e+07	2.9934e+07	1.58853e+07	7	8	9	9	8	9	8	9	9	10	9	7	8	9	9	8	9	8	9	9	10	9
P08249	17448	Mdh2	TRUE	Malate dehydrogenase, mitochondrial OS=Mus musculus OX=10090 GN=Mdh2 PE=1 SV=3	49	13	78	13	54.374	222.27	13	35.6	7.27284e+06	8.07807e+06	1.04098e+07	7.6639e+06	1.11827e+07	2.32477e+07	2.19688e+07	2.47813e+07	4.25054e+07	6.08993e+07	1.47281e+07	9	11	13	9	9	12	10	10	13	13	9	9	11	13	9	9	12	10	10	13	13	9
Q9DCB8	74316	Isca2	TRUE	Iron-sulfur cluster assembly 2 homolog, mitochondrial OS=Mus musculus OX=10090 GN=Isca2 PE=1 SV=2	51	8	78	8	28.945	222.98	8	16.7	1.17535e+07	1.61584e+07	1.99954e+07	2.28372e+07	1.73264e+07	5.62621e+07	45932852	5.59354e+07	7.6942e+07	8.849e+07	4.74476e+07	8	8	7	8	7	8	8	8	8	8	8	8	8	7	8	7	8	8	8	8	8	8
Q9D819	67895	Ppa1	FALSE	Inorganic pyrophosphatase OS=Mus musculus OX=10090 GN=Ppa1 PE=1 SV=1	56	13	78	13	48.901	199.46	13	32.6	8.41318e+06	1.33991e+07	1.66927e+07	1.37591e+07	1.22013e+07	1.33062e+07	6.14689e+06	9235882	1.59054e+07	1.49021e+07	1.76634e+07	10	12	12	11	10	11	9	11	10	10	12	10	12	12	11	10	11	9	11	10	10	12
Q5XJE5	235497	Leo1	FALSE	RNA polymerase-associated protein LEO1 OS=Mus musculus OX=10090 GN=Leo1 PE=1 SV=2	25	12	77	12	45.606	225.31	12	75.6	6.28996e+06	6.14325e+06	6.7697e+06	7.43227e+06	6.9022e+06	6.89705e+06	7.10819e+06	5.73763e+06	1.36394e+07	8.07397e+06	8.92648e+06	9	10	10	10	9	9	9	9	11	9	10	9	10	10	10	9	9	9	9	11	9	10
Q7TNE3	216873	Spag7	FALSE	Sperm-associated antigen 7 OS=Mus musculus OX=10090 GN=Spag7 PE=1 SV=1	49	8	77	8	49.356	248.94	8	25.9	8.02635e+06	6.60754e+06	4.78576e+06	7.01492e+06	9.96555e+06	5.5622e+06	7.97901e+06	8.0652e+06	1.18231e+07	8.28471e+06	1.1188e+07	7	7	7	7	7	6	7	7	8	7	7	7	7	7	7	7	6	7	7	8	7	7
Q9Z0P4	18483	Palm	FALSE	Paralemmin-1 OS=Mus musculus OX=10090 GN=Palm PE=1 SV=1	51	15	77	15	52.237	185.53	15	41.6	5.14786e+06	5.05097e+06	6.93637e+06	7.98773e+06	7.15102e+06	1.61853e+07	6.39222e+06	7.56442e+06	1.28115e+07	1.15074e+07	1.45306e+07	14	12	13	14	14	15	14	13	14	14	14	14	12	13	14	14	15	14	13	14	14	14
A2BH40	93760	Arid1a	FALSE	AT-rich interactive domain-containing protein 1A OS=Mus musculus OX=10090 GN=Arid1a PE=1 SV=1	12	15	77	15	70.078	242.32	15	241.9	3.11826e+06	2.48159e+06	2.98144e+06	3.72146e+06	4.06099e+06	2.93397e+06	2.83254e+06	2.21395e+06	5.3213e+06	3.06128e+06	6.40412e+06	12	11	11	11	11	8	12	9	10	10	12	12	11	11	11	11	8	12	9	10	10	12
P05977	17901	Myl1	FALSE	Myosin light chain 1/3, skeletal muscle isoform OS=Mus musculus OX=10090 GN=Myl1 PE=1 SV=2	90	19	77	15	128.108	234.09	19	20.6	3.92535e+06	4.13031e+06	4.87267e+06	6.50834e+06	4.54009e+06	8.81212e+08	6.19601e+06	4.59913e+06	1.62852e+07	9.88505e+06	1.06527e+07	8	4	4	3	4	19	4	3	4	2	4	8	4	4	3	4	19	4	3	4	2	4
Q62419	20405	Sh3gl1	FALSE	Endophilin-A2 OS=Mus musculus OX=10090 GN=Sh3gl1 PE=1 SV=1	50	13	77	13	49.391	223.74	13	41.5	3.26604e+06	7.53176e+06	6.86237e+06	6.04328e+06	4.40131e+06	1.08193e+07	5.94467e+06	8.60389e+06	1.26472e+07	1.12071e+07	8.93596e+06	10	12	11	12	11	11	10	12	11	11	12	10	12	11	12	11	11	10	12	11	11	12
A2AS89	75986	Agmat	TRUE	Agmatinase, mitochondrial OS=Mus musculus OX=10090 GN=Agmat PE=1 SV=1	46	10	77	10	55.786	259.79	10	38.2	1.28505e+07	2.33979e+07	1.83046e+07	1.59552e+07	3.43842e+07	2.76988e+07	1.05372e+07	2.69326e+07	2.59513e+07	4.47849e+07	1.93447e+07	8	10	7	7	7	9	8	9	9	9	8	8	10	7	7	7	9	8	9	9	9	8
P48771	12866	Cox7a2	TRUE	Cytochrome c oxidase subunit 7A2, mitochondrial OS=Mus musculus OX=10090 GN=Cox7a2 PE=1 SV=2	57	3	77	3	44.171	253.78	3	9.3	6.38364e+07	7.01776e+07	6.9168e+07	7.4136e+07	1.10967e+08	2.39359e+07	2.56101e+07	1.04167e+07	4.95746e+07	2.79858e+07	6.07316e+07	3	3	3	3	3	3	3	3	3	3	3	3	3	3	3	3	3	3	3	3	3	3
Q9CZS1	72535	Aldh1b1	TRUE	Aldehyde dehydrogenase X, mitochondrial OS=Mus musculus OX=10090 GN=Aldh1b1 PE=1 SV=1	42	21	77	20	86.348	221.53	21	57.5	4.83634e+06	1.05524e+07	1.33771e+07	7.70163e+06	6.37113e+06	2.70594e+07	1.18551e+07	2.02097e+07	3.74213e+07	4.62749e+07	1.83373e+07	7	12	13	8	6	19	9	15	19	19	11	7	12	13	8	6	19	9	15	19	19	11
Q148V8	105732	Fam83h	FALSE	Protein FAM83H OS=Mus musculus OX=10090 GN=Fam83h PE=1 SV=1	17	15	77	15	64.316	215.32	15	131	7.15003e+06	5.60414e+06	4.75738e+06	3.05899e+06	8.1853e+06	1.74244e+06	3.61821e+06	3.41025e+06	2.62411e+06	2.61807e+06	6.27412e+06	13	13	13	11	15	9	13	12	10	12	14	13	13	13	11	15	9	13	12	10	12	14
Q7TMF3	66414	Ndufa12	TRUE	NADH dehydrogenase [ubiquinone] 1 alpha subcomplex subunit 12 OS=Mus musculus OX=10090 GN=Ndufa12 PE=1 SV=2	75	10	77	10	46.973	207.3	10	17.1	1.96585e+06	9.36525e+06	1.0361e+07	7.0432e+06	3.84973e+06	2.10098e+07	7.63095e+06	2.11889e+07	1.95993e+07	2.49544e+07	1.48364e+07	8	10	10	9	8	10	10	10	10	10	10	8	10	10	9	8	10	10	10	10	10	10
Q9EST5	67628	Anp32b	FALSE	Acidic leucine-rich nuclear phosphoprotein 32 family member B OS=Mus musculus OX=10090 GN=Anp32b PE=1 SV=1	36	10	76	6	34.674	190.71	10	31.1	4.4379e+06	1.77747e+07	1.5146e+07	1.2979e+07	5.58016e+06	3.4132e+07	1.33601e+07	1.35433e+07	3.01797e+07	3.09354e+07	1.68267e+07	8	9	8	8	8	8	9	8	9	8	9	8	9	8	8	8	8	9	8	9	8	9
P49586	13026	Pcyt1a	FALSE	Choline-phosphate cytidylyltransferase A OS=Mus musculus OX=10090 GN=Pcyt1a PE=1 SV=1	49	14	76	14	56.74	177.47	14	41.6	1.92546e+06	1.18342e+07	1.24079e+07	6.73545e+06	2.94975e+06	1.27459e+07	3.59826e+06	7.01234e+06	8.95101e+06	1.47446e+07	8.13008e+06	10	14	13	11	10	13	12	12	13	13	12	10	14	13	11	10	13	12	12	13	13	12
Q91YD9	73178	Wasl	FALSE	Neural Wiskott-Aldrich syndrome protein OS=Mus musculus OX=10090 GN=Wasl PE=1 SV=1	35	10	76	10	37.063	232.48	10	54.2	1.1591e+07	1.24792e+07	8.55523e+06	9.67809e+06	1.2428e+07	8.73945e+06	1.55119e+07	1.32356e+07	1.48847e+07	1.82761e+07	1.89513e+07	9	10	8	9	9	9	8	9	8	9	9	9	10	8	9	9	9	8	9	8	9	9
Q9D8B3	75608	Chmp4b	FALSE	Charged multivesicular body protein 4b OS=Mus musculus OX=10090 GN=Chmp4b PE=1 SV=2	54	10	76	9	37.573	248.67	10	24.9	5.05016e+07	4.23139e+07	3.13846e+07	4.48649e+07	5.77845e+07	3.55988e+07	4.59283e+07	3.65721e+07	9.13483e+07	5.04803e+07	8.2277e+07	10	9	10	10	10	10	10	10	10	10	10	10	9	10	10	10	10	10	10	10	10	10
P13597	15894	Icam1	FALSE	Intercellular adhesion molecule 1 OS=Mus musculus OX=10090 GN=Icam1 PE=1 SV=1	18	8	76	8	38.886	216.81	8	58.8	4.33117e+06	8.81155e+06	1.24246e+07	1.50471e+07	3.85582e+06	1.70056e+07	6.58685e+06	1.02699e+07	2.51185e+07	1.65653e+07	1.72963e+07	8	8	8	8	7	8	8	8	8	8	8	8	8	8	8	7	8	8	8	8	8	8
Q5SX79	71774	Shroom1	FALSE	Protein Shroom1 OS=Mus musculus OX=10090 GN=Shroom1 PE=1 SV=2	25	15	76	15	56.364	214.75	15	89.9	5.48363e+06	9.19176e+06	1.00788e+07	7.91296e+06	6.76724e+06	2.14227e+06	3.58242e+06	5.26741e+06	3.52519e+06	3.48054e+06	7.66291e+06	13	15	15	15	14	9	13	12	11	13	14	13	15	15	15	14	9	13	12	11	13	14
Q8VDT9	28028	Mrpl50	TRUE	39S ribosomal protein L50, mitochondrial OS=Mus musculus OX=10090 GN=Mrpl50 PE=1 SV=2	60	8	76	8	45.306	245.18	8	18.2	2.69296e+06	4.16865e+06	4.94019e+06	3.32508e+06	3.8906e+06	1.33673e+07	1.02891e+07	1.62074e+07	2.27411e+07	2.06472e+07	8.75659e+06	8	8	8	7	7	7	8	8	8	8	8	8	8	8	7	7	7	8	8	8	8	8
P00329	11522	Adh1	FALSE	Alcohol dehydrogenase 1 OS=Mus musculus OX=10090 GN=Adh1 PE=1 SV=2	42	11	76	11	42.286	219.44	11	39.7	1.27127e+07	3.12833e+07	3.6865e+07	2.9428e+07	2.34187e+07	1.38247e+07	1.5533e+07	2.34592e+07	1.72291e+07	2.04489e+07	2.71387e+07	7	10	10	9	7	6	6	7	7	8	7	7	10	10	9	7	6	6	7	7	8	7
P35700	18477	Prdx1	FALSE	Peroxiredoxin-1 OS=Mus musculus OX=10090 GN=Prdx1 PE=1 SV=1	53	11	75	11	35.765	172.58	11	22.2	1.73764e+07	3.3781e+07	4.66349e+07	3.19419e+07	2.31169e+07	3.17651e+07	1.4491e+07	2.13974e+07	3.03375e+07	4.34701e+07	3.0741e+07	9	9	9	10	9	9	8	9	10	10	9	9	9	9	10	9	9	8	9	10	10	9
P97457	17907	Mylpf	FALSE	Myosin regulatory light chain 2, skeletal muscle isoform OS=Mus musculus OX=10090 GN=Mylpf PE=1 SV=3	86	17	75	17	106.849	226.09	17	18.9	6.39445e+06	636249	641494	416292	516364	6.10435e+08	571504	588078	526035	337892	822019	11	3	3	2	2	17	3	1	3	1	3	11	3	3	2	2	17	3	1	3	1	3
Q9JHE7	56844	Tssc4	FALSE	Protein TSSC4 OS=Mus musculus OX=10090 GN=Tssc4 PE=1 SV=1	39	10	75	10	41.833	182.96	10	33.5	8.67983e+06	5.44249e+06	5.56571e+06	7.68124e+06	9.43603e+06	3.96741e+06	6.5926e+06	5.7975e+06	1.75869e+07	7.75101e+06	1.24157e+07	10	10	10	10	10	10	10	10	10	10	10	10	10	10	10	10	10	10	10	10	10	10
P97372	19188	Psme2	FALSE	Proteasome activator complex subunit 2 OS=Mus musculus OX=10090 GN=Psme2 PE=1 SV=4	53	12	75	12	50.481	216.46	12	27	329862	2.12613e+07	1.63835e+07	1.00894e+07	294284	1.4958e+07	1.22867e+06	6.36313e+06	6.59358e+06	1.46177e+07	9.46668e+06	3	12	12	12	3	12	8	12	10	11	11	3	12	12	12	3	12	8	12	10	11	11
P54726	19358	Rad23a	FALSE	UV excision repair protein RAD23 homolog A OS=Mus musculus OX=10090 GN=Rad23a PE=1 SV=2	49	11	75	9	40.483	221.81	11	39.7	6.75849e+06	5.14423e+06	6.4136e+06	8.06827e+06	4.73434e+06	7.6058e+06	4.61553e+06	6.76509e+06	7.9183e+06	6.73286e+06	8.60694e+06	8	8	8	10	9	9	8	8	8	9	8	8	8	8	10	9	9	8	8	8	9	8
P18242	13033	Ctsd	FALSE	Cathepsin D OS=Mus musculus OX=10090 GN=Ctsd PE=1 SV=1	38	13	75	13	54.248	195.55	13	44.9	3.39727e+06	8.64349e+06	9.95753e+06	1.38968e+07	5.22028e+06	1.80419e+07	1.05763e+07	9.87139e+06	2.07805e+07	1.23535e+07	1.78545e+07	9	10	10	11	8	11	10	9	11	10	12	9	10	10	11	8	11	10	9	11	10	12
Q61249	18518	Igbp1	FALSE	Immunoglobulin-binding protein 1 OS=Mus musculus OX=10090 GN=Igbp1 PE=1 SV=1	44	12	75	12	57.579	204.63	12	38.9	1.19965e+07	1.37609e+07	1.40928e+07	1.50099e+07	1.06766e+07	1.30206e+07	2.66502e+07	1.48605e+07	5.59698e+07	2.42982e+07	3.64165e+07	8	11	11	11	9	11	10	11	11	11	11	8	11	11	11	9	11	10	11	11	11	11
Q00915	19659	Rbp1	FALSE	Retinol-binding protein 1 OS=Mus musculus OX=10090 GN=Rbp1 PE=1 SV=2	60	11	75	11	70.694	198.18	11	15.8	1.04667e+06	1.58085e+07	1.34114e+07	1.00133e+07	2.06797e+06	3.76633e+07	1.01107e+07	1.67563e+07	2.5055e+07	3.08288e+07	1.58626e+07	3	10	10	8	6	11	10	10	10	10	8	3	10	10	8	6	11	10	10	10	10	8
Q925I1	108888	Atad3a	TRUE	ATPase family AAA domain-containing protein 3 OS=Mus musculus OX=10090 GN=Atad3 PE=1 SV=1	27	13	75	13	49.827	212.24	13	66.7	2.63715e+06	3.11483e+06	2.64761e+06	2.49651e+06	2.59696e+06	5.00146e+06	5.88754e+06	7.38945e+06	1.09206e+07	1.3205e+07	6.4353e+06	9	12	12	13	10	12	12	13	12	13	11	9	12	12	13	10	12	12	13	12	13	11
Q61247	18816	Serpinf2	FALSE	Alpha-2-antiplasmin OS=Mus musculus OX=10090 GN=Serpinf2 PE=1 SV=1	42	14	74	14	59.182	244.94	14	54.9	1.14611e+07	1.59589e+07	1.39205e+07	1.84575e+07	1.06629e+07	1.29958e+07	5.48736e+06	1.10783e+07	1.27852e+07	1.01408e+07	1.68556e+07	12	12	13	12	12	11	12	12	12	12	13	12	12	13	12	12	11	12	12	12	12	13
P01837	16071	Igkc	FALSE	Immunoglobulin kappa constant OS=Mus musculus OX=10090 GN=Igkc PE=1 SV=2	81	7	74	7	45.258	211.04	7	11.9	1.86379e+07	2.04957e+07	2.33812e+07	3.959e+07	1.10141e+07	2.96644e+07	1.34874e+07	1.51942e+07	4.06986e+07	2.03159e+07	1.69422e+07	6	6	6	6	4	6	5	5	7	5	5	6	6	6	6	4	6	5	5	7	5	5
P63024	22319	Vamp3	FALSE	Vesicle-associated membrane protein 3 OS=Mus musculus OX=10090 GN=Vamp3 PE=1 SV=1	56	7	74	4	53.463	237.57	7	11.5	1.10202e+07	9.55208e+06	1.19108e+07	1.22568e+07	1.68432e+07	1.32415e+07	1.48326e+07	1.36497e+07	1.38668e+07	1.29395e+07	1.47797e+07	6	6	7	6	6	6	7	6	7	7	7	6	6	7	6	6	6	7	6	7	7	7
Q9D0B5	77032	Tstd3	TRUE	Thiosulfate sulfurtransferase/rhodanese-like domain-containing protein 3 OS=Mus musculus OX=10090 GN=Tstd3 PE=1 SV=1	57	8	74	8	50.302	205.07	8	17.3	4.23286e+06	5.84926e+06	6.11431e+06	6.40097e+06	6.81392e+06	1.48241e+07	1.17668e+07	1.52616e+07	1.49255e+07	2.07775e+07	1.30043e+07	6	6	7	6	7	7	7	7	7	6	6	6	6	7	6	7	7	7	7	7	6	6
Q9CQ45	66208	Nenf	FALSE	Neudesin OS=Mus musculus OX=10090 GN=Nenf PE=1 SV=1	64	8	74	8	38.822	193.68	8	18.9	6.67302e+06	6.36456e+06	6.66524e+06	9.99777e+06	9.01676e+06	1.33634e+07	1.82569e+07	1.86497e+07	3.67522e+07	2.5321e+07	2.68287e+07	7	6	6	6	6	8	8	7	8	8	8	7	6	6	6	6	8	8	7	8	8	8
Q8C3W1	69551	2310022B05Rik	FALSE	Uncharacterized protein C1orf198 homolog OS=Mus musculus OX=10090 PE=1 SV=1	72	14	74	14	64.412	239.09	14	35.3	6.67647e+06	5.94217e+06	5.70971e+06	6.71024e+06	7.6808e+06	6.10935e+06	8017439	6.08011e+06	1.198e+07	6.81583e+06	1.15828e+07	13	12	12	14	14	11	13	11	12	13	13	13	12	12	14	14	11	13	11	12	13	13
Q7TMY8	59026	Huwe1	FALSE	E3 ubiquitin-protein ligase HUWE1 OS=Mus musculus OX=10090 GN=Huwe1 PE=1 SV=5	7	16	74	16	67.737	234.4	16	482.3	4.97252e+06	3.12699e+06	1.9018e+06	2.68538e+06	2.90486e+06	6.18489e+06	9.95284e+06	6.40126e+06	1.11085e+07	1.25644e+07	7.0963e+06	12	10	7	9	9	13	14	12	13	14	11	12	10	7	9	9	13	14	12	13	14	11
P54869	15360	Hmgcs2	TRUE	Hydroxymethylglutaryl-CoA synthase, mitochondrial OS=Mus musculus OX=10090 GN=Hmgcs2 PE=1 SV=2	23	9	74	9	42.413	200.69	9	56.8	3.99024e+06	6.77749e+06	9.93849e+06	5.9786e+06	1.02226e+07	5.82352e+06	2.96367e+06	4.94792e+06	9.97751e+06	12801551	9.30952e+06	7	8	9	8	9	7	8	8	8	9	8	7	8	9	8	9	7	8	8	8	9	8
Q8R3Q6	381045	Ccdc58	TRUE	Protein MIX23 OS=Mus musculus OX=10090 GN=Mix23 PE=1 SV=1	53	8	73	8	38.064	204.23	8	16.7	3.39054e+06	8.22522e+06	8.22908e+06	6.67712e+06	5.94756e+06	1.82159e+07	1.09512e+07	18722498	2.14256e+07	2.25362e+07	1.39759e+07	5	7	7	7	7	7	7	7	8	8	8	5	7	7	7	7	7	7	7	8	8	8
P57016	16763	Lad1	FALSE	Ladinin-1 OS=Mus musculus OX=10090 GN=Lad1 PE=1 SV=1	41	18	73	18	61.562	201.4	18	58.8	1.10064e+07	2.60435e+06	1.95958e+06	2.9098e+06	1.16596e+07	3.71653e+06	5.822e+06	2.81442e+06	2.36068e+06	3.37472e+06	2.54856e+06	16	13	12	13	18	13	16	12	10	14	11	16	13	12	13	18	13	16	12	10	14	11
P35569	16367	Irs1	FALSE	Insulin receptor substrate 1 OS=Mus musculus OX=10090 GN=Irs1 PE=1 SV=1	15	13	73	13	61.431	222.46	13	130.6	4.84748e+06	5.41788e+06	4.75404e+06	4.81744e+06	5.9526e+06	1.87586e+06	3.2662e+06	3.36682e+06	4.45305e+06	3.22927e+06	7.20804e+06	10	13	12	13	13	8	12	12	11	11	12	10	13	12	13	13	8	12	12	11	11	12
Q9R182	30924	Angptl3	FALSE	Angiopoietin-related protein 3 OS=Mus musculus OX=10090 GN=Angptl3 PE=1 SV=1	26	10	73	10	35.972	203.06	10	52.5	5.33275e+06	4.7288e+06	5.57253e+06	5.40865e+06	7.31795e+06	6.87395e+06	4.98466e+06	5.80972e+06	7.56103e+06	7.26526e+06	7.68152e+06	10	10	10	10	10	9	10	10	9	10	9	10	10	10	10	10	9	10	10	9	10	9
P06537	14815	Nr3c1	FALSE	Glucocorticoid receptor OS=Mus musculus OX=10090 GN=Nr3c1 PE=1 SV=2	24	11	73	11	49.102	208.93	11	87.1	1.22225e+07	1.28585e+07	1.11991e+07	1.18564e+07	1.19689e+07	5.07702e+06	7.75997e+06	7.30888e+06	8.84614e+06	7.95314e+06	1.72961e+07	9	10	9	11	10	7	9	9	8	8	10	9	10	9	11	10	7	9	9	8	8	10
Q9CR51	66290	Atp6v1g1	FALSE	V-type proton ATPase subunit G 1 OS=Mus musculus OX=10090 GN=Atp6v1g1 PE=1 SV=3	73	8	73	8	45.718	251.11	8	13.7	3.13059e+07	3.11009e+07	2.29124e+07	3.7357e+07	3.31704e+07	2.20002e+07	6.45875e+07	4.65999e+07	9.87741e+07	8.49529e+07	6.6517e+07	7	7	6	8	6	6	8	8	7	8	7	7	7	6	8	6	6	8	8	7	8	7
Q9D735	68544	Trir	FALSE	Telomerase RNA component interacting RNase OS=Mus musculus OX=10090 GN=Trir PE=1 SV=1	39	8	73	8	30.437	206.36	8	18.4	1.10526e+07	8.86487e+06	7.26233e+06	1.0069e+07	1.46192e+07	5.94223e+06	8.24235e+06	8.88511e+06	1.65292e+07	8.05081e+06	1.39411e+07	8	8	8	8	8	7	8	8	8	8	8	8	8	8	8	8	7	8	8	8	8	8
Q921H8	113868	Acaa1a	TRUE	3-ketoacyl-CoA thiolase A, peroxisomal OS=Mus musculus OX=10090 GN=Acaa1a PE=1 SV=1	40	10	73	4	54.883	249.17	10	43.9	4.15027e+06	8.81863e+06	8.42958e+06	5.3508e+06	7.99365e+06	5.79603e+06	3.38209e+06	5.75382e+06	1.0062e+07	1.24457e+07	8.46119e+06	8	9	9	9	9	9	6	7	8	10	9	8	9	9	9	9	9	6	7	8	10	9
Q60974	20185	Ncor1	FALSE	Nuclear receptor corepressor 1 OS=Mus musculus OX=10090 GN=Ncor1 PE=1 SV=1	11	20	73	19	67.69	188.16	20	270.5	1.14786e+08	8.47813e+07	8.8602e+07	7.54684e+07	1.26425e+08	7.2981e+07	8.2854e+07	9.65819e+07	1.09517e+08	7.59157e+07	1.2204e+08	17	17	16	14	15	11	14	15	12	16	16	17	17	16	14	15	11	14	15	12	16	16
Q7TSI3	243819	Ppp6r1	FALSE	Serine/threonine-protein phosphatase 6 regulatory subunit 1 OS=Mus musculus OX=10090 GN=Ppp6r1 PE=1 SV=1	22	13	73	13	55.863	190.91	13	94.5	2.08578e+06	3.28686e+06	3.57863e+06	3.1413e+06	2.45309e+06	4.39013e+06	2.18134e+06	2.70705e+06	3.20124e+06	5.76729e+06	4.18515e+06	9	9	9	8	8	12	7	9	8	11	10	9	9	9	8	8	12	7	9	8	11	10
Q9WTR5	12554	Cdh13	FALSE	Cadherin-13 OS=Mus musculus OX=10090 GN=Cdh13 PE=1 SV=2	21	11	73	11	50.64	222.63	11	78.1	5.04999e+06	3.84325e+06	5.12769e+06	9.32961e+06	5.77137e+06	1.6568e+07	5.59287e+06	4.30631e+06	6.00877e+06	4.41258e+06	8172091	11	10	10	11	11	11	11	10	10	9	10	11	10	10	11	11	11	11	10	10	9	10
Q8CBW3	11308	Abi1	FALSE	Abl interactor 1 OS=Mus musculus OX=10090 GN=Abi1 PE=1 SV=3	42	14	72	14	58.231	198.46	14	52.3	8.19523e+06	1.40878e+07	1.38373e+07	1.41621e+07	1.26592e+07	1.35544e+07	8.10267e+06	9.55053e+06	1.64775e+07	1.29818e+07	1.5182e+07	12	14	14	13	11	14	13	12	14	13	14	12	14	14	13	11	14	13	12	14	13	14
Q8CHC4	104015	Synj1	FALSE	Synaptojanin-1 OS=Mus musculus OX=10090 GN=Synj1 PE=1 SV=3	15	13	72	13	50.295	205.54	13	172.5	5.80162e+06	3.38665e+06	3.07252e+06	3.70041e+06	4.57986e+06	2.76016e+06	4.5675e+06	4.31496e+06	5.25004e+06	4.68335e+06	6.80286e+06	12	9	9	11	9	8	12	9	9	9	11	12	9	9	11	9	8	12	9	9	9	11
Q9JMG7	29877	Hdgfl3	FALSE	Hepatoma-derived growth factor-related protein 3 OS=Mus musculus OX=10090 GN=Hdgfl3 PE=1 SV=2	37	9	72	6	37.987	205.34	9	22.4	3.11426e+06	2.77951e+06	2.38636e+06	3.70753e+06	5.42241e+06	3.97888e+06	2.92985e+06	4.28661e+06	8.523e+06	3.43308e+06	5.46671e+06	7	7	7	8	8	6	7	7	9	7	8	7	7	7	8	8	6	7	7	9	7	8
Q6R891	217124	Ppp1r9b	FALSE	Neurabin-2 OS=Mus musculus OX=10090 GN=Ppp1r9b PE=1 SV=1	24	14	72	14	50.776	206.45	14	89.5	2.74555e+06	3.30627e+06	2.60656e+06	3.13046e+06	3.09012e+06	3.83732e+06	3.50628e+06	2.74194e+06	5.22403e+06	3.05682e+06	5.31503e+06	12	11	9	11	10	12	11	10	12	10	11	12	11	9	11	10	12	11	10	12	10	11
Q9CQN7	107733	Mrpl41	TRUE	39S ribosomal protein L41, mitochondrial OS=Mus musculus OX=10090 GN=Mrpl41 PE=1 SV=1	59	8	72	8	32.699	199.51	8	15.3	8.77107e+06	1.0014e+07	9.9822e+06	9.52274e+06	1.47561e+07	2.23118e+07	3.0316e+07	4.22918e+07	5.69889e+07	4.71452e+07	2.92829e+07	7	7	7	7	7	7	8	7	8	7	7	7	7	7	7	7	7	8	7	8	7	7
Q8CI08	75991	Slain2	FALSE	SLAIN motif-containing protein 2 OS=Mus musculus OX=10090 GN=Slain2 PE=1 SV=2	29	13	72	13	48.288	190.24	13	62.3	9.34522e+06	7.3424e+06	8.75563e+06	8.65084e+06	1.38137e+07	7.6529e+06	9.33606e+06	9.5687e+06	1.50402e+07	9.03831e+06	1.47848e+07	12	11	12	11	11	11	11	11	12	10	12	12	11	12	11	11	11	11	11	12	10	12
P28654	13179	Dcn	FALSE	Decorin OS=Mus musculus OX=10090 GN=Dcn PE=1 SV=1	34	12	72	11	41.741	195.87	12	39.8	1.44048e+06	5.84454e+06	5.77337e+06	1.89107e+07	2.95821e+06	9.79522e+07	1.67805e+06	3.26238e+06	6.13887e+06	9.58389e+06	1.24303e+07	7	6	8	11	6	12	6	7	8	9	10	7	6	8	11	6	12	6	7	8	9	10
Q9CYR0	381760	Ssbp1	TRUE	Single-stranded DNA-binding protein, mitochondrial OS=Mus musculus OX=10090 GN=Ssbp1 PE=1 SV=1	39	6	71	6	37.683	190.55	6	17.3	6.24853e+06	1.19245e+07	1.36279e+07	1.13195e+07	9.32894e+06	2.18561e+07	2.12238e+07	2.85004e+07	3.95069e+07	3.08893e+07	2.29598e+07	6	6	6	6	6	6	6	6	6	6	6	6	6	6	6	6	6	6	6	6	6	6
P49312	15382	Hnrnpa1	FALSE	Heterogeneous nuclear ribonucleoprotein A1 OS=Mus musculus OX=10090 GN=Hnrnpa1 PE=1 SV=2	30	10	71	6	47.544	214.46	10	34.2	3.71659e+06	2.64034e+06	2.74142e+06	4.31333e+06	4.03192e+06	2.39716e+06	4.79389e+06	2.96899e+06	9.00812e+06	4.60575e+06	6.90506e+06	8	9	9	9	9	8	8	9	9	10	10	8	9	9	9	9	8	8	9	9	10	10
P63276	20068	Rps17	FALSE	40S ribosomal protein S17 OS=Mus musculus OX=10090 GN=Rps17 PE=1 SV=2	60	9	71	9	50.2	205.77	9	15.5	5.34335e+06	1.77505e+07	1.80789e+07	1.54514e+07	1.23498e+07	1.58515e+07	8.65497e+06	1.5015e+07	3.18001e+07	3.31219e+07	2.48843e+07	7	7	9	8	8	8	8	7	9	8	9	7	7	9	8	8	8	8	7	9	8	9
B1AZI6	331401	Thoc2	FALSE	THO complex subunit 2 OS=Mus musculus OX=10090 GN=Thoc2 PE=1 SV=1	4	7	71	7	21.908	164.13	7	182.7	4.36309e+06	3.619e+06	2.88691e+06	3.83851e+06	5.0493e+06	2.85994e+06	3.43587e+06	3.73207e+06	6.48378e+06	4.75859e+06	5.70529e+06	7	7	7	7	7	6	7	7	7	7	7	7	7	7	7	7	6	7	7	7	7	7
Q9CT10	71810	Ranbp3	FALSE	Ran-binding protein 3 OS=Mus musculus OX=10090 GN=Ranbp3 PE=1 SV=2	31	10	71	10	54.587	200.58	10	52.5	9.9857e+06	8.36252e+06	6.51814e+06	7.94335e+06	10666849	6.27871e+06	1.00377e+07	8.82197e+06	1.4733e+07	1.26738e+07	1.41283e+07	9	9	7	9	8	8	10	8	9	9	9	9	9	7	9	8	8	10	8	9	9	9
Q9D1Q6	76299	Erp44	FALSE	Endoplasmic reticulum resident protein 44 OS=Mus musculus OX=10090 GN=Erp44 PE=1 SV=1	53	16	71	16	64.885	184.81	16	46.8	602948	1.4657e+07	1.35458e+07	7.0304e+06	1.51269e+06	1.86245e+07	1.31889e+06	5.88821e+06	5.11355e+06	1.27328e+07	6.53326e+06	3	15	14	14	9	14	6	14	9	13	12	3	15	14	14	9	14	6	14	9	13	12
Q9EPJ9	228998	Arfgap1	FALSE	ADP-ribosylation factor GTPase-activating protein 1 OS=Mus musculus OX=10090 GN=Arfgap1 PE=1 SV=2	40	9	71	9	43.041	212.7	9	45.3	9.24544e+06	6.06194e+06	4.39322e+06	5.65718e+06	9.18556e+06	2.96897e+06	4.40426e+06	5.13996e+06	6.20821e+06	3.64328e+06	1.02091e+07	8	9	8	8	8	5	8	7	7	6	8	8	9	8	8	8	5	8	7	7	6	8
Q8CCS6	54196	Pabpn1	FALSE	Polyadenylate-binding protein 2 OS=Mus musculus OX=10090 GN=Pabpn1 PE=1 SV=3	60	10	71	10	41.536	198.22	10	32.3	6.38935e+06	7.10055e+06	7.49726e+06	6.63701e+06	6.73849e+06	7.24516e+06	5.88331e+06	7.28408e+06	5.99345e+07	1.0377e+07	9.65984e+06	10	9	9	9	9	9	9	9	9	9	9	10	9	9	9	9	9	9	9	9	9	9
P97449	16790	Anpep	FALSE	Aminopeptidase N OS=Mus musculus OX=10090 GN=Anpep PE=1 SV=4	25	19	71	19	73.558	194.33	19	109.6	1.80664e+06	6.7633e+06	7.46556e+06	5.05601e+06	2.7294e+06	1.01044e+07	2.49364e+06	5.28646e+06	6.85465e+06	1.65103e+07	6.15114e+06	3	16	17	12	5	16	7	11	12	19	9	3	16	17	12	5	16	7	11	12	19	9
Q8VDZ4	228136	Zdhhc5	FALSE	Palmitoyltransferase ZDHHC5 OS=Mus musculus OX=10090 GN=Zdhhc5 PE=1 SV=1	22	11	71	11	50.488	219.62	11	77.5	6.43454e+06	4.11954e+06	4.50084e+06	3.61627e+06	6.30543e+06	1.86938e+06	3.79827e+06	4.37564e+06	3637421	2.13724e+06	5.63157e+06	11	9	10	10	11	6	11	10	8	7	10	11	9	10	10	11	6	11	10	8	7	10
Q9D6J6	72900	Ndufv2	TRUE	NADH dehydrogenase [ubiquinone] flavoprotein 2, mitochondrial OS=Mus musculus OX=10090 GN=Ndufv2 PE=1 SV=2	45	9	71	9	39.78	203.09	9	27.3	3.31271e+06	9.58346e+06	1.21867e+07	7.10512e+06	4.77596e+06	4.60762e+07	1.29234e+07	2.6872e+07	2.16941e+07	4.85414e+07	1.49135e+07	7	7	7	7	7	9	8	8	8	8	8	7	7	7	7	7	9	8	8	8	8	8
P97825	15374	Jpt1	FALSE	Jupiter microtubule associated homolog 1 OS=Mus musculus OX=10090 GN=Jpt1 PE=1 SV=3	75	7	71	7	33.244	213.22	7	16.1	3.22562e+06	2.69241e+06	2.2797e+06	3.45547e+06	4.71868e+06	5.83259e+06	4.85204e+06	3.79249e+06	1.30321e+07	7.07951e+06	9.16474e+06	6	7	6	7	7	6	7	7	7	6	7	6	7	6	7	7	6	7	7	7	6	7
Q8BJ05	75553	Zc3h14	FALSE	Zinc finger CCCH domain-containing protein 14 OS=Mus musculus OX=10090 GN=Zc3h14 PE=1 SV=1	31	16	71	16	60.969	192.16	16	82.4	5.28222e+06	5.99411e+06	5042665	4.46671e+06	4.79328e+06	4.27682e+06	3.61705e+06	4.02188e+06	7.25827e+06	5551709	6.57865e+06	15	15	14	14	14	13	14	14	14	13	14	15	15	14	14	14	13	14	14	14	13	14
Q9ERR1	83431	Ndel1	FALSE	Nuclear distribution protein nudE-like 1 OS=Mus musculus OX=10090 GN=Ndel1 PE=1 SV=2	32	10	70	7	36.765	200.58	10	38.3	5.03072e+06	5.00127e+06	5.0206e+06	4.8996e+06	6.33263e+06	4.67566e+06	4.9156e+06	5.06702e+06	7.36228e+06	5.54043e+06	8.05567e+06	9	10	10	9	10	9	10	10	8	9	9	9	10	10	9	10	9	10	10	8	9	9
Q60932	22333	Vdac1	TRUE	Voltage-dependent anion-selective channel protein 1 OS=Mus musculus OX=10090 GN=Vdac1 PE=1 SV=3	46	9	70	8	33.897	171.5	9	32.3	4.13033e+06	4.98189e+06	7.03703e+06	6.87884e+06	9.05985e+06	1.59485e+07	1.24311e+07	2.08818e+07	2.50275e+07	2.15862e+07	1.42961e+07	6	7	7	6	6	8	7	8	7	7	7	6	7	7	6	6	8	7	8	7	7	7
Q8BTE0	68002	Sdhaf4	TRUE	Succinate dehydrogenase assembly factor 4, mitochondrial OS=Mus musculus OX=10090 GN=Sdhaf4 PE=3 SV=2	31	5	70	5	21.793	167.68	5	11.9	1.05124e+07	8.13754e+06	8.48204e+06	9823441	1.49421e+07	1.3782e+07	2.37465e+07	2.87104e+07	33301153	3.11187e+07	2.24401e+07	5	5	5	5	5	5	5	5	5	5	5	5	5	5	5	5	5	5	5	5	5	5
Q9D024	67163	Ccdc47	FALSE	PAT complex subunit CCDC47 OS=Mus musculus OX=10090 GN=Ccdc47 PE=1 SV=2	32	12	70	12	57.132	185.96	12	55.8	3.45565e+06	9.38125e+06	8.61727e+06	6.78704e+06	8.72576e+06	1.26633e+07	5.08144e+06	9.17115e+06	8.82435e+06	1.40549e+07	1.05267e+07	5	11	11	11	9	12	9	11	10	11	11	5	11	11	11	9	12	9	11	10	11	11
Q9JM96	56699	Cdc42ep4	FALSE	Cdc42 effector protein 4 OS=Mus musculus OX=10090 GN=Cdc42ep4 PE=1 SV=1	42	11	70	11	56.044	205.44	11	37.8	1.1704e+07	9.53245e+06	8.79826e+06	9.63338e+06	1.36561e+07	9.35474e+06	1.13405e+07	1.31774e+07	1.5676e+07	1.08464e+07	1.59138e+07	10	9	9	10	9	8	9	10	10	9	10	10	9	9	10	9	8	9	10	10	9	10
Q64735	12946	Cr1l	FALSE	Complement component receptor 1-like protein OS=Mus musculus OX=10090 GN=Cr1l PE=1 SV=1	19	7	70	7	32.218	192	7	53.7	3.13984e+06	7.96838e+06	1.03107e+07	9.02101e+06	5.37113e+06	1.42694e+07	4.34667e+06	7.18202e+06	1.16463e+07	8.69214e+06	8.84052e+06	7	7	7	7	7	7	7	7	7	7	7	7	7	7	7	7	7	7	7	7	7	7
Q0VGB7	232314	Ppp4r2	FALSE	Serine/threonine-protein phosphatase 4 regulatory subunit 2 OS=Mus musculus OX=10090 GN=Ppp4r2 PE=1 SV=1	37	11	69	11	58.68	227.75	11	46.5	5.50708e+06	4.8815e+06	5.16551e+06	5.22047e+06	5.33109e+06	4.30241e+06	4.05683e+06	4.95305e+06	8.29301e+06	6.82637e+06	7.91138e+06	8	9	10	8	7	8	10	10	11	9	10	8	9	10	8	7	8	10	10	11	9	10
Q9WV92	13823	Epb41l3	FALSE	Band 4.1-like protein 3 OS=Mus musculus OX=10090 GN=Epb41l3 PE=1 SV=1	12	8	69	7	34.41	188.56	8	103.3	1.80477e+06	1.1956e+06	777639	1.61018e+06	1.64504e+06	1.29767e+06	890194	851983	1.57941e+06	1.50755e+06	3.40901e+06	8	7	6	7	7	6	6	6	8	7	8	8	7	6	7	7	6	6	6	8	7	8
Q7TQD2	72948	Tppp	FALSE	Tubulin polymerization-promoting protein OS=Mus musculus OX=10090 GN=Tppp PE=1 SV=1	48	9	69	9	33.548	196.68	9	23.6	8.85524e+06	9.62902e+06	8.5382e+06	1.02759e+07	1.28163e+07	8.81887e+06	5353232	6.90339e+06	1.14728e+07	4.18476e+06	1.58523e+07	9	7	8	9	9	8	8	8	9	7	9	9	7	8	9	9	8	8	8	9	7	9
P23953	13884	Ces1c	FALSE	Carboxylesterase 1C OS=Mus musculus OX=10090 GN=Ces1c PE=1 SV=4	26	11	69	9	43.045	179.03	11	61	2.75997e+06	2.96577e+06	3.70045e+06	5.51631e+06	2.23116e+06	3.70048e+06	2.02057e+06	2.69657e+06	3.12175e+06	3.62175e+06	4.74013e+06	10	10	11	11	9	9	10	9	8	9	10	10	10	11	11	9	9	10	9	8	9	10
P97290	12258	Serping1	FALSE	Plasma protease C1 inhibitor OS=Mus musculus OX=10090 GN=Serping1 PE=1 SV=3	29	9	69	9	57.091	224.83	9	55.5	6.24689e+06	5.2173e+06	6.49424e+06	1.15809e+07	7.68824e+06	3.79974e+06	4.47947e+06	7.06211e+06	7.19014e+06	2.98924e+06	1.03144e+07	9	9	8	9	9	6	9	9	8	7	9	9	9	8	9	9	6	9	9	8	7	9
Q9CZN7	108037	Shmt2	TRUE	Serine hydroxymethyltransferase, mitochondrial OS=Mus musculus OX=10090 GN=Shmt2 PE=1 SV=1	36	13	69	13	50.527	181.11	13	55.7	1.76126e+06	3.07528e+06	4471175	4.13964e+06	3.96061e+06	1.04113e+07	1.06288e+07	1.30626e+07	1.43529e+07	1.52245e+07	6.54107e+06	7	9	9	8	8	9	9	10	10	11	8	7	9	9	8	8	9	9	10	10	11	8
Q61191	15161	Hcfc1	FALSE	Host cell factor 1 OS=Mus musculus OX=10090 GN=Hcfc1 PE=1 SV=2	7	11	69	11	42.194	183.13	11	210.3	1.07283e+07	7.75161e+06	8.03441e+06	7.88751e+06	1.23097e+07	5.72332e+06	4.96202e+06	6.33555e+06	8.96196e+06	6.83494e+06	1.34213e+07	10	10	10	10	11	10	10	10	10	10	10	10	10	10	10	11	10	10	10	10	10	10
Q80Y14	73046	Glrx5	TRUE	Glutaredoxin-related protein 5, mitochondrial OS=Mus musculus OX=10090 GN=Glrx5 PE=1 SV=2	35	4	69	4	23.418	198.72	4	16.3	1.39217e+07	1.78354e+07	21023662	2.32805e+07	1.89939e+07	8.63436e+07	4.74836e+07	5.28808e+07	7.78205e+07	8.81396e+07	4.83006e+07	4	4	4	4	4	4	4	4	4	4	4	4	4	4	4	4	4	4	4	4	4	4
Q8R2M2	99480	Dnttip2	FALSE	Deoxynucleotidyltransferase terminal-interacting protein 2 OS=Mus musculus OX=10090 GN=Dnttip2 PE=1 SV=1	29	14	69	14	57.076	187.71	14	84.2	6.10063e+06	4.0531e+06	3.00172e+06	3.39479e+06	6.07387e+06	2.95356e+06	5.9405e+06	5.28056e+06	1.19373e+07	7.19738e+06	6.8821e+06	13	13	9	12	13	7	13	14	14	13	11	13	13	9	12	13	7	13	14	14	13	11
B2RRE7	73945	Otud4	FALSE	OTU domain-containing protein 4 OS=Mus musculus OX=10090 GN=Otud4 PE=1 SV=1	11	11	69	11	41.349	167.9	11	123	4.85521e+06	5.36507e+06	4.74577e+06	4.88095e+06	4.73081e+06	3.98265e+06	4.11926e+06	4.85328e+06	7.03038e+06	6.29718e+06	8.44286e+06	11	11	10	10	10	10	11	11	11	11	11	11	11	10	10	10	10	11	11	11	11	11
Q9CR29	52715	Ccdc43	FALSE	Coiled-coil domain-containing protein 43 OS=Mus musculus OX=10090 GN=Ccdc43 PE=1 SV=1	36	8	69	8	38.453	214.93	8	25	4.84173e+06	7.16263e+06	7.20482e+06	7.54834e+06	5.36874e+06	9.81028e+06	8.34076e+06	8.32062e+06	1.13555e+07	9.41345e+06	1.16833e+07	7	8	8	8	8	8	8	8	8	8	8	7	8	8	8	8	8	8	8	8	8	8
Q80TH2	59079	Erbin	FALSE	Erbin OS=Mus musculus OX=10090 GN=Erbin PE=1 SV=3	12	12	69	12	51.571	194.56	12	157.2	6.2608e+06	5.70326e+06	4.90696e+06	4.14844e+06	6.28462e+06	3.89292e+06	5.30469e+06	5.05051e+06	6.13118e+06	5.08229e+06	7.70785e+06	11	10	11	11	11	11	11	10	11	9	11	11	10	11	11	11	11	11	10	11	9	11
P30204	20288	Msr1	FALSE	Macrophage scavenger receptor types I and II OS=Mus musculus OX=10090 GN=Msr1 PE=1 SV=3	29	11	69	11	49.414	232.43	11	50.1	1.02024e+07	1.19549e+07	1.60336e+07	1.58546e+07	1.1172e+07	1.22136e+07	1.18061e+07	1.3364e+07	2.3315e+07	2.12847e+07	2.48277e+07	8	9	9	10	9	9	8	9	9	8	9	8	9	9	10	9	9	8	9	9	8	9
P42125	13177	Eci1	TRUE	Enoyl-CoA delta isomerase 1, mitochondrial OS=Mus musculus OX=10090 GN=Eci1 PE=1 SV=2	30	7	69	7	30.933	213.17	7	32.2	6.03434e+06	8.26339e+06	7.20954e+06	6934689	1.02842e+07	1.1552e+07	1.40483e+07	1.90598e+07	2.48363e+07	2.37321e+07	1.48792e+07	6	7	6	6	6	7	7	7	7	7	7	6	7	6	6	6	7	7	7	7	7	7
Q7TPV4	18432	Mybbp1a	FALSE	Myb-binding protein 1A OS=Mus musculus OX=10090 GN=Mybbp1a PE=1 SV=2	12	13	69	13	46.027	194.46	13	151.9	2.18353e+06	2.65984e+06	1.7499e+06	2.69414e+06	2.89429e+06	3.77755e+06	4.89792e+06	4.06329e+06	1.01278e+07	7.43796e+06	4.71966e+06	7	9	10	11	11	10	11	10	12	12	12	7	9	10	11	11	10	11	10	12	12	12
Q9Z1D1	53356	Eif3g	FALSE	Eukaryotic translation initiation factor 3 subunit G OS=Mus musculus OX=10090 GN=Eif3g PE=1 SV=2	43	13	68	13	56.85	210.58	13	35.6	1.06647e+07	7.27091e+06	5.7083e+06	9.49323e+06	9.90851e+06	1.0182e+07	9.99223e+06	9.47805e+06	1.42163e+07	1.35321e+07	1.48131e+07	11	10	10	12	12	12	12	11	11	11	13	11	10	10	12	12	12	12	11	11	11	13
O70404	22320	Vamp8	FALSE	Vesicle-associated membrane protein 8 OS=Mus musculus OX=10090 GN=Vamp8 PE=1 SV=1	45	5	68	5	26.372	168.59	5	11.4	3.14122e+07	2.25673e+07	2.69358e+07	2.18261e+07	3.79691e+07	2.22903e+07	3.04068e+07	2.41332e+07	2.93462e+07	2.55011e+07	2.99754e+07	5	5	5	5	5	5	5	5	5	5	5	5	5	5	5	5	5	5	5	5	5	5
Q8BH43	242687	Wasf2	FALSE	Wiskott-Aldrich syndrome protein family member 2 OS=Mus musculus OX=10090 GN=Wasf2 PE=1 SV=1	19	9	68	9	32.497	200.23	9	54	1.14517e+07	1.33251e+07	1.37631e+07	1.22205e+07	1.32423e+07	1.4408e+07	1.24428e+07	1.39277e+07	2.47871e+07	1.64839e+07	2.15557e+07	8	9	9	9	9	9	8	9	8	8	9	8	9	9	9	9	9	8	9	8	8	9
Q80U78	80912	Pum1	FALSE	Pumilio homolog 1 OS=Mus musculus OX=10090 GN=Pum1 PE=1 SV=2	12	10	68	10	54.726	184.26	10	126.5	6.16562e+06	4.6156e+06	3.87751e+06	4.84341e+06	7.18404e+06	3.09187e+06	5.01747e+06	4.4628e+06	8.24807e+06	5.54592e+06	8.71597e+06	9	9	8	8	9	8	8	8	9	9	10	9	9	8	8	9	8	8	8	9	9	10
Q9JIK9	79044	Mrps34	TRUE	28S ribosomal protein S34, mitochondrial OS=Mus musculus OX=10090 GN=Mrps34 PE=1 SV=1	40	7	68	7	30.76	186.99	7	25.8	3.84676e+06	6.2168e+06	6.24309e+06	5.3546e+06	5.51935e+06	8.69775e+06	9.07607e+06	16592475	1.67337e+07	18017668	1.08781e+07	7	7	7	7	7	7	6	7	7	7	7	7	7	7	7	7	7	6	7	7	7	7
P18608	15312	Hmgn1	FALSE	Non-histone chromosomal protein HMG-14 OS=Mus musculus OX=10090 GN=Hmgn1 PE=1 SV=2	55	5	68	5	21.173	201.97	5	10.1	6.70905e+06	7.1133e+06	5.17156e+06	1.05495e+07	7.62938e+06	5.02942e+06	5.39185e+06	4.66834e+06	1.75957e+07	7.38979e+06	1.18327e+07	4	4	4	4	4	4	4	4	5	4	4	4	4	4	4	4	4	4	4	5	4	4
P24668	17113	M6pr	FALSE	Cation-dependent mannose-6-phosphate receptor OS=Mus musculus OX=10090 GN=M6pr PE=1 SV=1	37	9	68	9	40.065	186.41	9	31.2	5.92872e+06	1.86629e+07	2.28196e+07	1.93925e+07	9.12723e+06	2.83425e+07	1.20022e+07	1.49252e+07	2.25047e+07	2.53715e+07	2.38814e+07	8	8	8	8	8	8	8	8	9	8	8	8	8	8	8	8	8	8	8	9	8	8
Q9Z0U1	21873	Tjp2	FALSE	Tight junction protein ZO-2 OS=Mus musculus OX=10090 GN=Tjp2 PE=1 SV=2	16	15	68	15	53.891	154.81	15	131.2	6.07769e+06	4.52991e+06	3.50198e+06	3.21508e+06	5.42159e+06	3.86101e+06	3.54717e+06	4.2136e+06	5.01782e+06	5.43013e+06	7.50631e+06	13	11	10	10	11	11	10	11	9	11	11	13	11	10	10	11	11	10	11	9	11	11
Q921H9	69893	Coa7	TRUE	Cytochrome c oxidase assembly factor 7 OS=Mus musculus OX=10090 GN=Coa7 PE=1 SV=1	48	9	68	9	34.743	174.44	9	25.6	3.87128e+06	6.08995e+06	6.49937e+06	5.27708e+06	5.26287e+06	2.48454e+07	1.85341e+07	2.74588e+07	3.43097e+07	3.72395e+07	1.72338e+07	6	7	7	9	6	9	8	9	8	8	9	6	7	7	9	6	9	8	9	8	8	9
Q8CAQ8	76614	Immt	TRUE	MICOS complex subunit Mic60 OS=Mus musculus OX=10090 GN=Immt PE=1 SV=1	22	15	67	15	58.265	186.02	15	83.8	2.41393e+07	2.13547e+07	2.33274e+07	2.59244e+07	4.09378e+07	4.39997e+07	7.31591e+07	8.41621e+07	1.39093e+08	9.12607e+07	7.85032e+07	14	10	13	13	15	15	14	15	15	15	15	14	10	13	13	15	15	14	15	15	15	15
O35943	14297	Fxn	TRUE	Frataxin, mitochondrial OS=Mus musculus OX=10090 GN=Fxn PE=1 SV=1	47	6	67	6	32.248	225.36	6	22.9	2.2283e+07	2.0965e+07	2.22656e+07	2.67734e+07	4.28e+07	4.89128e+07	6.41928e+07	9.62962e+07	170542815	9.40912e+07	9.11714e+07	5	6	5	6	5	5	6	6	5	6	6	5	6	5	6	5	5	6	6	5	6	6
Q9D1F4	67605	Akt1s1	FALSE	Proline-rich AKT1 substrate 1 OS=Mus musculus OX=10090 GN=Akt1s1 PE=1 SV=1	46	7	67	7	44.366	217.16	7	27.5	1.8913e+07	1.50915e+07	1.62355e+07	1.5868e+07	1.62994e+07	1.2691e+07	1.75235e+07	1.49482e+07	3.40901e+07	2.03063e+07	2.59144e+07	6	6	6	6	5	6	7	5	6	6	6	6	6	6	6	5	6	7	5	6	6	6
B1AZP2	228836	Dlgap4	FALSE	Disks large-associated protein 4 OS=Mus musculus OX=10090 GN=Dlgap4 PE=1 SV=1	9	9	67	9	30.696	151.89	9	108	1.98481e+07	1.40827e+07	1.15268e+07	1.2986e+07	1.9557e+07	9.26697e+06	9.9254e+06	1.03488e+07	1.46888e+07	9.88818e+06	1.81435e+07	7	8	7	8	7	7	7	7	8	7	7	7	8	7	8	7	7	7	7	8	7	7
Q8K4P0	74320	Wdr33	FALSE	pre-mRNA 3' end processing protein WDR33 OS=Mus musculus OX=10090 GN=Wdr33 PE=1 SV=1	11	11	67	11	47.973	182.57	11	145.2	5.30992e+06	3.60486e+06	2.73586e+06	2.86731e+06	3.78664e+06	1.53044e+06	2.81446e+06	2.66712e+06	4.20737e+06	3.38484e+06	5.46197e+06	11	10	9	9	10	8	11	9	9	9	11	11	10	9	9	10	8	11	9	9	9	11
Q80TY0	14269	Fnbp1	FALSE	Formin-binding protein 1 OS=Mus musculus OX=10090 GN=Fnbp1 PE=1 SV=2	25	13	67	13	49.038	179.69	13	71.3	1.79915e+06	4.51657e+06	3.99427e+06	3.47549e+06	1.90431e+06	5.10021e+06	2.95446e+06	3.75492e+06	5.81669e+06	5.93567e+06	6.42799e+06	6	10	11	11	6	11	10	10	9	11	10	6	10	11	11	6	11	10	10	9	11	10
Q6NZF1	70579	Zc3h11a	FALSE	Zinc finger CCCH domain-containing protein 11A OS=Mus musculus OX=10090 GN=Zc3h11a PE=1 SV=1	27	14	67	14	53.062	177.56	14	86.4	5.07668e+06	4.34332e+06	3.53384e+06	4.10952e+06	6.77369e+06	1.96924e+06	3.51079e+06	3.46312e+06	3.72283e+06	3.31574e+06	6.36435e+06	14	13	12	12	13	8	11	13	9	12	12	14	13	12	12	13	8	11	13	9	12	12
Q91Z83	140781	Myh7	FALSE	Myosin-7 OS=Mus musculus OX=10090 GN=Myh7 PE=2 SV=1	30	53	67	32	223.965	204.9	53	222.7	139028	239122	260221	341855	146816	3.40991e+07	201149	212074	451295	294251	259339	3	4	4	7	5	53	4	4	4	6	2	3	4	4	7	5	53	4	4	4	6	2
P21614	14473	Gc	FALSE	Vitamin D-binding protein OS=Mus musculus OX=10090 GN=Gc PE=1 SV=2	17	11	67	11	40.525	180.81	11	53.6	4.77138e+06	9.30705e+06	9.73422e+06	5.97081e+06	8.59925e+06	1.5151e+07	6.30091e+06	8.28893e+06	1.14035e+07	1.40635e+07	1.13016e+07	9	11	11	10	9	11	9	10	10	11	10	9	11	11	10	9	11	9	10	10	11	10
Q9R0Q7	56351	Ptges3	FALSE	Prostaglandin E synthase 3 OS=Mus musculus OX=10090 GN=Ptges3 PE=1 SV=1	43	8	67	8	29.1	164.92	8	18.7	1.23194e+07	2.54193e+07	2.48682e+07	3.98531e+07	17550154	31815199	1.08827e+07	1.69004e+07	2.64541e+07	2.731e+07	2.72797e+07	7	7	7	7	7	7	7	7	8	7	7	7	7	7	7	7	7	7	7	8	7	7
Q8C2Q3	56275	Rbm14	FALSE	RNA-binding protein 14 OS=Mus musculus OX=10090 GN=Rbm14 PE=1 SV=1	23	12	66	12	40.957	167.65	12	69.4	1.66386e+07	1.20113e+07	1.40121e+07	1.32363e+07	1.74847e+07	8.10981e+06	9.90593e+06	1.21385e+07	1.03399e+07	7.60099e+06	1.91315e+07	11	10	9	10	10	9	12	10	9	9	10	11	10	9	10	10	9	12	10	9	9	10
Q9D2M8	70620	Ube2v2	FALSE	Ubiquitin-conjugating enzyme E2 variant 2 OS=Mus musculus OX=10090 GN=Ube2v2 PE=1 SV=4	56	7	66	2	30.73	167.07	7	16.4	4.88181e+06	1.88707e+07	2.09531e+07	1.50023e+07	9.75257e+06	2.31865e+07	8.5961e+06	1.44651e+07	2.23529e+07	2.40109e+07	1.87549e+07	5	6	7	6	6	6	5	5	5	5	5	5	6	7	6	6	6	5	5	5	5	5
O35685	18221	Nudc	FALSE	Nuclear migration protein nudC OS=Mus musculus OX=10090 GN=Nudc PE=1 SV=1	50	16	66	16	49.182	172.5	16	38.3	2.39631e+06	1.42435e+07	1.34181e+07	8.92269e+06	2.97901e+06	1.90023e+07	4.22656e+06	1.09874e+07	8.77015e+06	1.52138e+07	1.0347e+07	8	14	13	12	7	14	11	14	13	15	15	8	14	13	12	7	14	11	14	13	15	15
Q9D727	67101	2310039H08Rik	FALSE	Uncharacterized protein C6orf226 homolog OS=Mus musculus OX=10090 PE=1 SV=1	88	7	66	7	30.696	188.57	7	12	1.45957e+07	9.61307e+06	1.07113e+07	1.32692e+07	1.95575e+07	5.91969e+06	9.19515e+06	9.59492e+06	1.97086e+07	1.17418e+07	1.7122e+07	6	6	6	7	7	5	5	6	7	7	7	6	6	6	7	7	5	5	6	7	7	7
Q8C3X2	66365	Ccdc90b	TRUE	Coiled-coil domain-containing protein 90B, mitochondrial OS=Mus musculus OX=10090 GN=Ccdc90b PE=1 SV=1	55	13	66	13	55.421	189.44	13	29.6	1.32647e+06	4.65861e+06	4.62207e+06	3.07611e+06	1.65909e+06	1.32596e+07	7.75034e+06	1.30191e+07	1.8351e+07	1.98994e+07	6.89695e+06	9	12	11	9	8	12	12	13	13	13	12	9	12	11	9	8	12	12	13	13	13	12
Q8C9B9	23856	Dido1	FALSE	Death-inducer obliterator 1 OS=Mus musculus OX=10090 GN=Dido1 PE=1 SV=4	10	13	66	13	54.705	208.78	13	247	5.55507e+06	3925641	3.52709e+06	3.55118e+06	4.69393e+06	1.60231e+06	3.18298e+06	2.43645e+06	5.02378e+06	3.00705e+06	5.0199e+06	13	12	11	12	11	9	11	10	11	9	10	13	12	11	12	11	9	11	10	11	9	10
Q8VCN6	673094	Cd99	FALSE	CD99 antigen OS=Mus musculus OX=10090 GN=Cd99 PE=1 SV=1	27	2	66	2	16.204	282.59	2	16.8	2.22108e+06	3.1748e+06	2.21075e+06	3.33016e+06	4.08861e+06	1.21921e+06	2.57935e+06	3.78216e+06	6.19212e+06	6.05109e+06	7.8767e+06	2	2	2	2	2	1	2	2	2	2	2	2	2	2	2	2	1	2	2	2	2	2
Q8BI72	70925	Cdkn2aip	FALSE	CDKN2A-interacting protein OS=Mus musculus OX=10090 GN=Cdkn2aip PE=1 SV=1	25	10	66	10	38.728	161.28	10	59.7	2.31336e+06	3.22312e+06	2.95547e+06	2.8971e+06	2.76624e+06	1.51705e+06	1.97716e+06	2.60112e+06	3.55243e+06	2.44551e+06	3.30379e+06	8	9	9	10	10	7	9	9	9	9	10	8	9	9	10	10	7	9	9	9	9	10
P24549	11668	Aldh1a1	FALSE	Aldehyde dehydrogenase 1A1 OS=Mus musculus OX=10090 GN=Aldh1a1 PE=1 SV=5	34	13	66	6	50.128	169.79	13	54.4	7.65533e+06	1.02954e+07	1.06677e+07	9.70163e+06	1.16158e+07	5.97606e+06	3.89824e+06	4.30452e+06	4.76459e+06	7.86544e+06	8.1421e+06	10	12	13	12	10	10	10	8	8	13	11	10	12	13	12	10	10	10	8	8	13	11
P62077	30057	Timm8b	TRUE	Mitochondrial import inner membrane translocase subunit Tim8 B OS=Mus musculus OX=10090 GN=Timm8b PE=1 SV=1	61	5	66	5	16.585	186.33	5	9.3	1.3144e+07	1.33387e+07	1.41807e+07	1.68328e+07	1.59261e+07	3.17082e+07	3.28161e+07	3.60999e+07	5.43496e+07	5.28653e+07	3.07046e+07	4	5	4	5	5	5	5	5	5	5	5	4	5	4	5	5	5	5	5	5	5	5
Q9CZY3	66589	Ube2v1	FALSE	Ubiquitin-conjugating enzyme E2 variant 1 OS=Mus musculus OX=10090 GN=Ube2v1 PE=1 SV=1	46	6	66	1	27.185	167.12	6	16.3	177118	922411	1.17307e+06	686874	273591	1.49581e+06	273054	682958	988683	1489823	793374	6	6	6	6	6	6	6	6	6	6	6	6	6	6	6	6	6	6	6	6	6	6
Q9CZL5	72562	Pcbd2	TRUE	Pterin-4-alpha-carbinolamine dehydratase 2 OS=Mus musculus OX=10090 GN=Pcbd2 PE=1 SV=2	47	6	66	6	29.276	158.11	6	14.8	3.45838e+08	2.88179e+08	3.0692e+08	3.30285e+08	5.59315e+08	2.08809e+08	2.38498e+08	2.74344e+08	2.51504e+08	2.18612e+08	4.31471e+08	5	6	6	6	6	6	6	6	6	6	6	5	6	6	6	6	6	6	6	6	6	6
Q9CQB5	67006	Cisd2	FALSE	CDGSH iron-sulfur domain-containing protein 2 OS=Mus musculus OX=10090 GN=Cisd2 PE=1 SV=1	50	6	65	6	25.369	164.82	6	15.2	2.05667e+07	2.18138e+07	2.48423e+07	2.3112e+07	3.51399e+07	2.47939e+07	2.46614e+07	3.0041e+07	3.17709e+07	2.55785e+07	3.54195e+07	5	6	6	6	6	6	6	6	6	6	6	5	6	6	6	6	6	6	6	6	6	6
O35857	21856	Timm44	TRUE	Mitochondrial import inner membrane translocase subunit TIM44 OS=Mus musculus OX=10090 GN=Timm44 PE=1 SV=2	21	11	65	11	45.621	178.3	11	51.1	1.37271e+07	6.17707e+06	4.84344e+06	6.59704e+06	15765113	1.00255e+07	1.54466e+07	1.77284e+07	1.95259e+07	1.74875e+07	1.6522e+07	10	9	10	10	10	10	10	11	11	11	11	10	9	10	10	10	10	10	11	11	11	11
B2RY56	67039	Rbm25	FALSE	RNA-binding protein 25 OS=Mus musculus OX=10090 GN=Rbm25 PE=1 SV=2	12	10	65	10	38.272	167.63	10	99.5	1.17764e+07	1.18256e+07	7.47749e+06	1.42099e+07	1.37772e+07	1.17483e+07	6.68789e+06	1.02488e+07	9.7106e+06	8.43515e+06	8.67819e+06	10	9	9	10	10	10	9	10	10	10	10	10	9	9	10	10	10	9	10	10	10	10
Q6P542	224742	Abcf1	FALSE	ATP-binding cassette sub-family F member 1 OS=Mus musculus OX=10090 GN=Abcf1 PE=1 SV=1	11	9	65	9	32.166	152.28	9	94.9	7.92627e+06	6.2493e+06	2.19719e+06	6.06205e+06	9.41188e+06	2.71618e+06	2.65672e+06	3.54439e+06	3.46468e+06	4.57689e+06	5.69527e+06	9	8	6	8	9	7	8	7	6	7	8	9	8	6	8	9	7	8	7	6	7	8
Q70FJ1	100986	Akap9	FALSE	A-kinase anchor protein 9 OS=Mus musculus OX=10090 GN=Akap9 PE=1 SV=2	6	19	65	19	67.574	178.97	19	435.9	4.32617e+06	3.70936e+06	3.06e+06	3.99586e+06	3.51424e+06	2.85943e+06	3.08936e+06	3.08424e+06	3.92921e+06	4.1899e+06	4.47426e+06	19	18	16	18	17	15	16	15	14	16	16	19	18	16	18	17	15	16	15	14	16	16
P84099	19921	Rpl19	FALSE	60S ribosomal protein L19 OS=Mus musculus OX=10090 GN=Rpl19 PE=1 SV=1	31	6	65	6	24.884	146.75	6	23.5	4.34897e+06	1.0685e+07	1.01265e+07	1.1557e+07	9.44477e+06	7.24926e+06	6.85457e+06	1.27269e+07	1.7183e+07	1.31908e+07	11263984	6	6	6	6	6	6	6	6	6	6	6	6	6	6	6	6	6	6	6	6	6	6
P62862	14109	Fau	FALSE	40S ribosomal protein S30 OS=Mus musculus OX=10090 GN=Fau PE=1 SV=1	34	5	65	5	18.671	164.85	5	6.6	4.86771e+07	7.80739e+07	6.39627e+07	8.76197e+07	7.96218e+07	6.68843e+07	7.06517e+07	7.5575e+07	1.20411e+08	8.41447e+07	8.38901e+07	3	3	3	4	3	3	3	3	5	5	4	3	3	3	4	3	3	3	3	5	5	4
P61982	22628	Ywhag	FALSE	14-3-3 protein gamma OS=Mus musculus OX=10090 GN=Ywhag PE=1 SV=2	30	7	65	2	26.584	154.96	7	28.3	554955	380476	436333	698388	857186	649606	550581	373343	604199	674954	574101	5	5	5	5	5	6	5	5	5	7	5	5	5	5	5	5	6	5	5	5	7	5
Q9D8S3	66251	Arfgap3	FALSE	ADP-ribosylation factor GTPase-activating protein 3 OS=Mus musculus OX=10090 GN=Arfgap3 PE=1 SV=2	25	11	65	11	48.47	174.77	11	57.4	8.26486e+06	5082049	3.43604e+06	5.55424e+06	7.65122e+06	4.13897e+06	5.61413e+06	4.7071e+06	8.00006e+06	5.62488e+06	9.49309e+06	11	10	8	11	10	6	11	10	11	10	11	11	10	8	11	10	6	11	10	11	10	11
Q9Z1R2	224727	Bag6	FALSE	Large proline-rich protein BAG6 OS=Mus musculus OX=10090 GN=Bag6 PE=1 SV=1	11	9	65	9	33.441	185.53	9	121	2.4278e+06	4.20169e+06	3.65771e+06	3.92084e+06	3.00525e+06	4.01909e+06	3.05438e+06	4.0181e+06	5.48582e+06	5.94561e+06	5.25092e+06	8	9	8	7	8	9	8	8	8	9	9	8	9	8	7	8	9	8	8	8	9	9
P62259	22627	Ywhae	FALSE	14-3-3 protein epsilon OS=Mus musculus OX=10090 GN=Ywhae PE=1 SV=1	21	6	65	3	28.066	177.86	6	29.2	324346	82569.9	285951	411520	338084	306678	443758	388558	1.1639e+06	377217	740718	4	4	5	4	5	4	4	4	4	4	4	4	4	5	4	5	4	4	4	4	4	4
P60904	13002	Dnajc5	FALSE	DnaJ homolog subfamily C member 5 OS=Mus musculus OX=10090 GN=Dnajc5 PE=1 SV=1	59	11	65	11	57.983	191.7	11	22.1	6.66149e+06	5.57496e+06	6.6516e+06	6.42335e+06	9.64985e+06	6.20945e+06	4.51573e+06	4.64533e+06	12622492	6.20567e+06	7.40613e+06	10	11	11	11	11	9	10	11	11	10	11	10	11	11	11	11	9	10	11	11	10	11
Q5NCR9	237859	Nsrp1	FALSE	Nuclear speckle splicing regulatory protein 1 OS=Mus musculus OX=10090 GN=Nsrp1 PE=1 SV=1	25	11	64	11	47.614	158.06	11	63.8	4.61759e+06	4.3261e+06	3.69443e+06	3.95234e+06	6.42218e+06	2.7698e+06	3.66981e+06	3.98175e+06	7.40627e+06	4.11184e+06	6.03695e+06	10	10	9	11	11	10	7	9	10	7	10	10	10	9	11	11	10	7	9	10	7	10
P04247	17189	Mb	FALSE	Myoglobin OS=Mus musculus OX=10090 GN=Mb PE=1 SV=3	81	13	64	13	80.305	190.76	13	17.1	1.41798e+07	137231	102120			3.06654e+08	1.40445e+06	359658	520920	63796.1	450516	4	2	2	0	0	13	2	3	2	2	3	4	2	2	0	0	13	2	3	2	2	3
Q9JIK5	56200	Ddx21	FALSE	Nucleolar RNA helicase 2 OS=Mus musculus OX=10090 GN=Ddx21 PE=1 SV=3	13	9	64	9	56.793	202.51	9	93.5	4.48659e+06	2.38662e+06	869682	2.39134e+06	4.96718e+06	2.94102e+06	4.69895e+06	4.16489e+06	8.14047e+06	5.64522e+06	5.10455e+06	8	6	4	6	7	6	7	6	7	8	7	8	6	4	6	7	6	7	6	7	8	7
Q91WP6	20716	Serpina3n	FALSE	Serine protease inhibitor A3N OS=Mus musculus OX=10090 GN=Serpina3n PE=1 SV=1	25	9	64	7	42.967	198.38	9	46.7	1.47521e+06	1.5816e+06	1.23245e+06	2.36565e+06	1.44949e+06	1.47542e+06	802742	1.34576e+06	1.49048e+06	1.9609e+06	2.55259e+06	8	7	7	8	8	6	7	7	8	7	7	8	7	7	8	8	6	7	7	8	7	7
P03953	11537	Cfd	FALSE	Complement factor D OS=Mus musculus OX=10090 GN=Cfd PE=1 SV=1	40	7	64	7	36.202	181.43	7	28	2.07086e+07	3.42852e+07	2.14218e+07	4.88831e+07	1.95222e+07	2.27883e+07	1.52734e+07	2.07454e+07	6.05117e+07	3.23154e+07	5.36986e+07	6	6	5	7	6	5	5	5	6	5	6	6	6	5	7	6	5	5	5	6	5	6
Q9CWM4	67199	Pfdn1	FALSE	Prefoldin subunit 1 OS=Mus musculus OX=10090 GN=Pfdn1 PE=1 SV=1	64	8	64	7	35.663	172.88	8	14.2	1.15845e+07	1.24629e+07	1.33359e+07	1.75309e+07	1.60171e+07	1.47694e+07	1.51786e+07	1.39967e+07	3.58611e+07	2.15748e+07	2.69966e+07	8	8	8	8	8	8	8	8	8	8	8	8	8	8	8	8	8	8	8	8	8	8
Q8CHP5	78428	Pym1	FALSE	Partner of Y14 and mago OS=Mus musculus OX=10090 GN=Pym1 PE=1 SV=2	68	10	64	10	47.121	199.19	10	22.7	3.26297e+07	2.47629e+07	1.91102e+07	2.80838e+07	4.16786e+07	1.30855e+07	1.88679e+07	1.99915e+07	3.15059e+07	1.55328e+07	3.94872e+07	8	8	7	7	8	8	8	7	9	7	8	8	8	7	7	8	8	8	7	9	7	8
Q9JHS4	270166	Clpx	TRUE	ATP-dependent Clp protease ATP-binding subunit clpX-like, mitochondrial OS=Mus musculus OX=10090 GN=Clpx PE=1 SV=2	22	10	64	10	41.556	194.81	10	69.2	1.79031e+06	4.65352e+06	4.62855e+06	2.54706e+06	1.96066e+06	8143497	4112790	6.24388e+06	6.68896e+06	1.36332e+07	5.48708e+06	5	9	7	6	4	9	7	8	7	10	7	5	9	7	6	4	9	7	8	7	10	7
Q6NVE8	72404	Wdr44	FALSE	WD repeat-containing protein 44 OS=Mus musculus OX=10090 GN=Wdr44 PE=1 SV=1	23	12	64	12	56.523	206.92	12	101.5	9.38423e+06	6.38829e+06	5.60148e+06	6.39212e+06	9161938	5.36431e+06	8.01716e+06	8.73681e+06	1.0224e+07	9.78393e+06	1.49052e+07	11	10	10	11	12	9	12	11	11	11	12	11	10	10	11	12	9	12	11	11	11	12
Q9D8E6	67891	Rpl4	FALSE	60S ribosomal protein L4 OS=Mus musculus OX=10090 GN=Rpl4 PE=1 SV=3	26	10	63	10	40.622	177.8	10	47.1	3.54215e+06	9.61468e+06	1.07746e+07	1.01671e+07	6.73605e+06	9.01503e+06	4.35867e+06	1.05471e+07	1.64142e+07	1.89136e+07	1.18275e+07	5	9	9	9	7	9	8	9	10	10	9	5	9	9	9	7	9	8	9	10	10	9
Q99LT0	66310	Dpy30	FALSE	Protein dpy-30 homolog OS=Mus musculus OX=10090 GN=Dpy30 PE=1 SV=1	88	6	63	6	31.016	218.43	6	11.2	1.33682e+07	1.19028e+07	1.22547e+07	1.60451e+07	2.36499e+07	1.38709e+07	1.70582e+07	1.91112e+07	4.76836e+07	2.71882e+07	2.85031e+07	5	5	5	5	5	5	5	5	6	5	5	5	5	5	5	5	5	5	5	6	5	5
Q99LY9	595136	Ndufs5	TRUE	NADH dehydrogenase [ubiquinone] iron-sulfur protein 5 OS=Mus musculus OX=10090 GN=Ndufs5 PE=1 SV=3	67	8	63	8	30.529	165.48	8	12.6	4.05667e+06	7.94045e+06	6.65035e+06	5.80164e+06	5.81431e+06	1.73662e+07	8.82276e+06	2.1077e+07	1.61405e+07	1.688e+07	1.19614e+07	7	7	7	7	7	8	7	7	7	7	7	7	7	7	7	7	8	7	7	7	7	7
P51881	11740	Slc25a5	TRUE	ADP/ATP translocase 2 OS=Mus musculus OX=10090 GN=Slc25a5 PE=1 SV=3	26	7	63	7	24.825	162.12	7	32.9	2.72417e+06	5.10916e+06	6.05156e+06	4.89735e+06	5.6391e+06	1.14952e+07	8.72679e+06	1.32445e+07	1.70296e+07	1.5325e+07	1.1499e+07	5	6	6	6	6	7	7	6	7	7	7	5	6	6	6	6	7	7	6	7	7	7
Q9R0H0	11430	Acox1	FALSE	Peroxisomal acyl-coenzyme A oxidase 1 OS=Mus musculus OX=10090 GN=Acox1 PE=1 SV=5	22	10	63	10	39.085	193.35	10	74.6	4.03354e+06	7.53732e+06	7.52599e+06	7.15422e+06	1.06003e+07	4.21015e+06	3.55989e+06	4.7968e+06	7.30308e+06	6.75155e+06	5.95959e+06	8	10	10	9	9	7	8	7	9	10	9	8	10	10	9	9	7	8	7	9	10	9
O89116	53611	Vti1a	FALSE	Vesicle transport through interaction with t-SNAREs homolog 1A OS=Mus musculus OX=10090 GN=Vti1a PE=1 SV=1	51	8	63	8	39.023	197.44	8	25	3.36316e+06	2.70405e+06	3.38994e+06	3.43207e+06	4.69715e+06	2.8664e+06	5.53528e+06	3.72272e+06	7.32672e+06	4.89015e+06	5.01008e+06	8	7	7	8	8	7	8	7	8	8	8	8	7	7	8	8	7	8	7	8	8	8
P19639	14864	Gstm3	FALSE	Glutathione S-transferase Mu 3 OS=Mus musculus OX=10090 GN=Gstm3 PE=1 SV=2	47	11	63	4	45.021	162.37	11	25.7	105583	255061	408662	249350		2.04423e+06	369965	765266	620901	2.58827e+06	621228	6	8	7	10	4	11	8	10	9	10	7	6	8	7	10	4	11	8	10	9	10	7
Q91VJ5	54633	Pqbp1	FALSE	Polyglutamine-binding protein 1 OS=Mus musculus OX=10090 GN=Pqbp1 PE=1 SV=1	42	7	63	7	29.789	165.7	7	30.6	9.60741e+06	7.63245e+06	6.78928e+06	7.782e+06	1.2249e+07	6.28932e+06	8.15705e+06	8.88516e+06	1.684e+07	8.29347e+06	1.30579e+07	7	6	6	7	7	7	6	7	7	7	7	7	6	6	7	7	7	6	7	7	7	7
Q91XT4	89867	Sec16b	FALSE	Protein transport protein Sec16B OS=Mus musculus OX=10090 GN=Sec16b PE=1 SV=3	15	11	63	11	59.463	155.27	11	115.4	6.99049e+06	4.41646e+06	3.54048e+06	4.23094e+06	5.61571e+06	1.54246e+06	1.79339e+06	2.52693e+06	2.81588e+06	1.52772e+06	5.61171e+06	11	10	10	10	11	8	8	9	8	7	10	11	10	10	10	11	8	8	9	8	7	10
Q6A065	545389	Cep170	FALSE	Centrosomal protein of 170 kDa OS=Mus musculus OX=10090 GN=Cep170 PE=1 SV=2	12	15	63	14	46.978	158.11	15	174.9	3.0951e+06	2.77126e+06	2.19572e+06	2.91139e+06	2.89821e+06	2.222e+06	2.75595e+06	3.52819e+06	4.99862e+06	3.77981e+06	5.67915e+06	12	11	11	12	11	11	12	12	10	12	13	12	11	11	12	11	11	12	12	10	12	13
Q9QZ47	21957	Tnnt3	FALSE	Troponin T, fast skeletal muscle OS=Mus musculus OX=10090 GN=Tnnt3 PE=1 SV=3	42	19	62	16	90.935	169.03	19	32.2	1.43097e+07				123154	4.07457e+08	2.2442e+06		7121.25	234920		6	0	0	0	1	19	2	0	1	2	0	6	0	0	0	1	19	2	0	1	2	0
P47941	12929	Crkl	FALSE	Crk-like protein OS=Mus musculus OX=10090 GN=Crkl PE=1 SV=2	35	8	62	8	36.273	157.53	8	33.8	1.90471e+06	5.49646e+06	5.26971e+06	3.49816e+06	2.84825e+06	5.71633e+06	2.07654e+06	3.96348e+06	4.40671e+06	5.87427e+06	4.82676e+06	7	8	8	8	7	7	8	7	7	8	8	7	8	8	8	7	7	8	7	7	8	8
Q9CQZ1	68196	Hsbp1	FALSE	Heat shock factor-binding protein 1 OS=Mus musculus OX=10090 GN=Hsbp1 PE=1 SV=1	72	4	62	4	36.762	191.22	4	8.6	5.7297e+06	5.08345e+06	3.58189e+06	7.97347e+06	1.20692e+07	5.82186e+06	3.79379e+06	6.867e+06	1.17328e+07	5.48474e+06	8.73157e+06	3	4	3	4	4	3	3	3	4	3	4	3	4	3	4	4	3	3	3	4	3	4
O08749	13382	Dld	TRUE	Dihydrolipoyl dehydrogenase, mitochondrial OS=Mus musculus OX=10090 GN=Dld PE=1 SV=2	24	7	62	7	37.509	198.65	7	54.2	4.63102e+06	6.48998e+06	4.91212e+06	7.06649e+06	4.53487e+06	1.37582e+07	1.36816e+07	1.76043e+07	2.22598e+07	2.14126e+07	1.1759e+07	7	6	6	6	6	7	6	6	7	7	6	7	6	6	6	6	7	6	6	7	7	6
Q8BYK6	229096	Ythdf3	FALSE	YTH domain-containing family protein 3 OS=Mus musculus OX=10090 GN=Ythdf3 PE=1 SV=2	12	5	62	5	25.83	186.13	5	63.9	8.1205e+06	5.96137e+06	4.68056e+06	5.35095e+06	9.38355e+06	3.65505e+06	5.51641e+06	5.95781e+06	7.79805e+06	5.29861e+06	8.94898e+06	5	5	5	5	5	5	5	5	5	5	5	5	5	5	5	5	5	5	5	5	5	5
Q8BGC0	72459	Htatsf1	FALSE	HIV Tat-specific factor 1 homolog OS=Mus musculus OX=10090 GN=Htatsf1 PE=1 SV=1	22	14	62	14	55.008	157.63	14	86.2	4.59427e+06	3.66268e+06	3.10783e+06	3.79217e+06	5.15922e+06	2.48714e+06	2.45993e+06	2.63593e+06	2.54363e+06	3.58829e+06	5.14115e+06	11	10	10	10	10	11	8	8	8	11	10	11	10	10	10	10	11	8	8	8	11	10
Q921W0	234852	Chmp1a	FALSE	Charged multivesicular body protein 1a OS=Mus musculus OX=10090 GN=Chmp1a PE=1 SV=1	29	7	62	7	20.685	138.8	7	21.6	1.25641e+07	8.54245e+06	7.48177e+06	8.12795e+06	1.26698e+07	8.14051e+06	1.00008e+07	9.09134e+06	2.05196e+07	9.40311e+06	1.55993e+07	7	7	7	7	7	7	7	7	7	7	7	7	7	7	7	7	7	7	7	7	7	7
P02468	226519	Lamc1	FALSE	Laminin subunit gamma-1 OS=Mus musculus OX=10090 GN=Lamc1 PE=1 SV=2	12	15	62	15	54.802	187.26	15	177.2	2.75184e+06	2.29784e+06	2.71021e+06	4.34165e+06	4.94442e+06	8.57062e+06	3.98436e+06	4.15294e+06	6.76237e+06	4.6215e+06	5.42233e+06	10	12	14	12	14	12	13	13	13	12	12	10	12	14	12	14	12	13	13	13	12	12
P43883	11520	Plin2	FALSE	Perilipin-2 OS=Mus musculus OX=10090 GN=Plin2 PE=1 SV=2	60	17	61	17	90.297	185.73	17	46.6	874393	3.58136e+06	4.20837e+06	4.59108e+06	4.11223e+06	5.01761e+06	2.08916e+06	1.9827e+06	1.0323e+08	9.60615e+06	4.21851e+06	4	10	10	12	5	9	7	8	17	10	10	4	10	10	12	5	9	7	8	17	10	10
Q3UPL0	69162	Sec31a	FALSE	Protein transport protein Sec31A OS=Mus musculus OX=10090 GN=Sec31a PE=1 SV=2	7	7	61	7	24.006	173.47	7	133.5	1.12332e+07	1.97437e+07	1.73069e+07	1.77677e+07	1.76177e+07	1.54654e+07	1.1771e+07	1.66727e+07	2.43257e+07	1.91235e+07	2.45115e+07	7	7	7	7	7	6	7	7	7	7	7	7	7	7	7	7	6	7	7	7	7	7
Q9CQM5	52700	Txndc17	FALSE	Thioredoxin domain-containing protein 17 OS=Mus musculus OX=10090 GN=Txndc17 PE=1 SV=1	62	6	61	6	19.882	141.16	6	14	15456793	3.34664e+07	3.04365e+07	4.22863e+07	2.67269e+07	3.68815e+07	2.47139e+07	25996989	56076412	5.64958e+07	4.46136e+07	4	5	5	6	6	5	5	5	5	5	5	4	5	5	6	6	5	5	5	5	5	5
Q6DVA0	224640	Lemd2	FALSE	LEM domain-containing protein 2 OS=Mus musculus OX=10090 GN=Lemd2 PE=1 SV=1	18	9	61	9	27.942	167.03	9	57.5	1.41498e+06	3.62909e+06	3.69867e+06	2.69229e+06	2.64052e+06	4.21807e+06	2.621e+06	3.56476e+06	4.48182e+06	3.92615e+06	3.44309e+06	5	9	9	8	8	9	8	9	9	9	9	5	9	9	8	8	9	8	9	9	9	9
Q3UMY5	78798	Eml4	FALSE	Echinoderm microtubule-associated protein-like 4 OS=Mus musculus OX=10090 GN=Eml4 PE=1 SV=1	9	8	61	8	32.655	163.56	8	110	6.31488e+06	5.28981e+06	3.98378e+06	5.25998e+06	7.15346e+06	4.86565e+06	6.15021e+06	5.65075e+06	6.41801e+06	6.62041e+06	9.367e+06	8	8	7	7	8	7	7	8	8	8	8	8	8	7	7	8	7	7	8	8	8	8
O35601	23880	Fyb	FALSE	FYN-binding protein 1 OS=Mus musculus OX=10090 GN=Fyb1 PE=1 SV=2	29	12	61	12	50.714	172.46	12	90	5.3801e+06	3.6659e+06	2.75479e+06	2.53618e+06	3.3307e+06	1.87965e+06	3.05096e+06	3110374	5.02253e+06	3.67421e+06	7.1235e+06	11	10	10	7	9	6	10	10	10	11	11	11	10	10	7	9	6	10	10	10	11	11
Q6PEV3	68524	Wipf2	FALSE	WAS/WASL-interacting protein family member 2 OS=Mus musculus OX=10090 GN=Wipf2 PE=1 SV=1	39	12	61	12	39.42	130.02	12	46.3	5.47622e+06	3.98486e+06	3.37735e+06	2.99163e+06	4.95078e+06	1.47326e+06	3.95509e+06	3.97848e+06	6.88248e+06	2.38725e+06	7.031e+06	11	10	10	9	11	6	11	10	10	7	11	11	10	10	9	11	6	11	10	10	7	11
P11438	16783	Lamp1	FALSE	Lysosome-associated membrane glycoprotein 1 OS=Mus musculus OX=10090 GN=Lamp1 PE=1 SV=2	18	6	61	6	34.997	177.97	6	43.8	7.45354e+06	1.97885e+07	2.17136e+07	2.02415e+07	1.06397e+07	2.66351e+07	1.18632e+07	2.04712e+07	3.25836e+07	3.47217e+07	2.70351e+07	4	4	4	5	4	5	5	4	6	5	5	4	4	4	5	4	5	5	4	6	5	5
P29788	22370	Vtn	FALSE	Vitronectin OS=Mus musculus OX=10090 GN=Vtn PE=1 SV=2	29	8	61	8	35.299	182.28	8	54.8	4.28156e+06	9.83312e+06	8.19808e+06	1.45393e+07	4.34624e+06	1.0547e+07	3.14722e+06	7.08985e+06	5.33634e+06	5.14774e+06	9.09443e+06	7	7	7	8	7	7	7	7	7	7	7	7	7	7	8	7	7	7	7	7	7	7
P97797	19261	Sirpa	FALSE	Tyrosine-protein phosphatase non-receptor type substrate 1 OS=Mus musculus OX=10090 GN=Sirpa PE=1 SV=2	26	8	61	8	46.593	177.71	8	56.4	3.43876e+06	3.50363e+06	5.21371e+06	5.16021e+06	4.39766e+06	5.14978e+06	5.00401e+06	4.95721e+06	1.25933e+07	7.50008e+06	1.24921e+07	7	7	7	7	7	7	8	7	8	8	8	7	7	7	7	7	7	8	7	8	8	8
Q9DAZ9	72008	Zfyve19	FALSE	Abscission/NoCut checkpoint regulator OS=Mus musculus OX=10090 GN=Zfyve19 PE=1 SV=2	38	10	61	10	47.768	175.16	10	43.2	4.31117e+06	4.46593e+06	3.36993e+06	2.45419e+06	3.58304e+06	1.75699e+06	2.58925e+06	2.02707e+06	2.33601e+06	2.24217e+06	3.37669e+06	10	10	10	9	10	9	8	9	8	8	10	10	10	10	9	10	9	8	9	8	8	10
Q9D554	75062	Sf3a3	FALSE	Splicing factor 3A subunit 3 OS=Mus musculus OX=10090 GN=Sf3a3 PE=1 SV=2	37	15	61	15	57.466	169.61	15	58.8	642878	6.76152e+06	6.52001e+06	3.98143e+06	864694	8.14528e+06	1.97182e+06	5.19234e+06	6.52068e+06	9.5097e+06	4.77767e+06	6	12	12	12	5	13	9	12	10	14	10	6	12	12	12	5	13	9	12	10	14	10
Q9CQW9	66141	Ifitm3	FALSE	Interferon-induced transmembrane protein 3 OS=Mus musculus OX=10090 GN=Ifitm3 PE=1 SV=1	48	4	61	3	42.191	191.26	4	14.9	1.33995e+07	9.82165e+06	1.12666e+07	1.02628e+07	1.26474e+07	9.42354e+06	8.38545e+06	7.5066e+06	8.05002e+06	5.95679e+06	1.73009e+07	4	4	4	4	4	4	4	4	3	4	4	4	4	4	4	4	4	4	4	3	4	4
Q80W21	68312	Gstm7	FALSE	Glutathione S-transferase Mu 7 OS=Mus musculus OX=10090 GN=Gstm7 PE=1 SV=1	37	10	61	1	41.43	173.97	10	25.7		237123	265288	115710			81745.1	120978				4	9	9	9	5	9	7	8	8	8	8	4	9	9	9	5	9	7	8	8	8	8
Q9JLZ8	24058	Sigirr	FALSE	Single Ig IL-1-related receptor OS=Mus musculus OX=10090 GN=Sigirr PE=1 SV=2	22	7	60	7	31.027	161.47	7	46.1	544161	3.80097e+06	5.36564e+06	3.95747e+06	754814	6.20322e+06	2.10576e+06	3.68667e+06	6.5833e+06	8.67139e+06	5.2598e+06	4	7	7	7	4	7	7	7	7	7	7	4	7	7	7	4	7	7	7	7	7	7
Q02614	57230	Sap30bp	FALSE	SAP30-binding protein OS=Mus musculus OX=10090 GN=Sap30bp PE=1 SV=2	29	8	60	8	29.597	162.75	8	33.8	4.85916e+06	4.56289e+06	4.18973e+06	5.23007e+06	6.53294e+06	3.39134e+06	3.28801e+06	3.5342e+06	6.78023e+06	4.68028e+06	6.27104e+06	8	7	7	8	8	6	7	7	8	7	7	8	7	7	8	8	6	7	7	8	7	7
Q9CPW2	68165	Fdx2	TRUE	Ferredoxin-2, mitochondrial OS=Mus musculus OX=10090 GN=Fdx2 PE=1 SV=1	38	6	60	6	23.404	188.35	6	18.8	6330733	6.65163e+06	6.87778e+06	9.10613e+06	8.01121e+06	2.09397e+07	2.59436e+07	2.70094e+07	5.4067e+07	4.16318e+07	2.24458e+07	5	5	5	5	4	5	5	5	6	5	5	5	5	5	5	4	5	5	5	6	5	5
Q8K012	214459	Fnbp1l	FALSE	Formin-binding protein 1-like OS=Mus musculus OX=10090 GN=Fnbp1l PE=1 SV=2	25	11	60	11	39.614	166.11	11	69.8	1.47744e+06	2.23817e+06	2.92122e+06	1.61726e+06	1.6629e+06	3.32587e+06	2.26163e+06	3.05094e+06	4.72335e+06	3.46147e+06	3.17063e+06	6	9	10	8	9	9	11	11	11	11	10	6	9	10	8	9	9	11	11	11	11	10
Q9D0S9	68917	Hint2	TRUE	Adenosine 5'-monophosphoramidase HINT2 OS=Mus musculus OX=10090 GN=Hint2 PE=1 SV=1	56	7	60	7	36.398	178.59	7	17.3	2.21038e+06	1.06727e+07	1.15456e+07	9.1147e+06	2.51992e+06	3.5798e+07	1.33313e+07	2.94394e+07	3.44547e+07	5.95099e+07	2.29828e+07	5	7	5	7	5	7	7	7	7	7	7	5	7	5	7	5	7	7	7	7	7	7
P62627	67068	Dynlrb1	FALSE	Dynein light chain roadblock-type 1 OS=Mus musculus OX=10090 GN=Dynlrb1 PE=1 SV=3	61	5	60	5	28.297	183.85	5	11	9.8383e+06	8.08302e+06	8.77881e+06	1.50729e+07	1.43474e+07	1.21159e+07	1.24101e+07	1.19836e+07	3.19825e+07	22014175	24303693	5	5	5	5	5	5	5	5	5	5	5	5	5	5	5	5	5	5	5	5	5	5
P13542	17885	Myh8	FALSE	Myosin-8 OS=Mus musculus OX=10090 GN=Myh8 PE=2 SV=2	22	43	60	2	181.724	185.92	43	222.6	131027	67931.6		112594		4.17692e+06	223122	125308	494147	234738	264655	7	4	5	5	5	43	5	3	3	6	4	7	4	5	5	5	43	5	3	3	6	4
Q9R1P4	26440	Psma1	FALSE	Proteasome subunit alpha type-1 OS=Mus musculus OX=10090 GN=Psma1 PE=1 SV=1	39	9	60	9	40.942	168.36	9	29.5	2.8659e+06	4.56111e+06	4.72222e+06	4.28806e+06	4.48037e+06	3.29487e+06	2.31047e+06	2.84163e+06	4.47961e+06	3.64711e+06	3.47549e+06	7	9	9	8	8	6	7	8	7	8	7	7	9	9	8	8	6	7	8	7	8	7
Q08857	12491	Cd36	FALSE	Platelet glycoprotein 4 OS=Mus musculus OX=10090 GN=Cd36 PE=1 SV=2	25	9	59	9	38.257	155.41	9	52.7	854744	7921644	1.17728e+07	1.01562e+07	2.27027e+06	1.3238e+07	4.59532e+06	6.55707e+06	2.8738e+07	1.634e+07	1.4501e+07	3	8	9	9	5	6	7	7	9	9	9	3	8	9	9	5	6	7	7	9	9	9
P34884	17319	Mif	FALSE	Macrophage migration inhibitory factor OS=Mus musculus OX=10090 GN=Mif PE=1 SV=2	24	3	59	3	24.45	159.73	3	12.5	4.42954e+06	1.64904e+07	1.9392e+07	1.56306e+07	8.55425e+06	3.97308e+07	1.86409e+07	2.81816e+07	4.77462e+07	8.16856e+07	3.15184e+07	3	3	3	3	3	3	3	3	3	3	3	3	3	3	3	3	3	3	3	3	3	3
P43275	80838	H1f1	FALSE	Histone H1.1 OS=Mus musculus OX=10090 GN=H1-1 PE=1 SV=2	30	6	59	4	32.578	183.5	6	21.8	1.72237e+06	8.58075e+06	3.71636e+06	3.75051e+06	3.01653e+06	1.09789e+07	3.49437e+06	3.83015e+06	1.858e+07	1.55605e+07	1.6587e+07	5	6	5	5	6	6	6	5	6	6	6	5	6	5	5	6	6	6	5	6	6	6
P57759	67397	Erp29	FALSE	Endoplasmic reticulum resident protein 29 OS=Mus musculus OX=10090 GN=Erp29 PE=1 SV=2	40	9	59	9	33.208	159.93	9	28.8	1.58677e+07	2.36988e+07	2.57697e+07	2.25954e+07	3.05998e+07	3.6654e+07	2.54769e+07	3.17431e+07	2.98579e+07	4.01935e+07	3.66501e+07	5	8	8	8	7	8	7	7	8	7	8	5	8	8	8	7	8	7	7	8	7	8
P16332	17850	Mmut	TRUE	Methylmalonyl-CoA mutase, mitochondrial OS=Mus musculus OX=10090 GN=Mmut PE=1 SV=2	22	11	59	11	44.345	194.63	11	82.8	2.11813e+06	2.68354e+06	2.5237e+06	2.4738e+06	3.97112e+06	5.76152e+06	5.90862e+06	9.14132e+06	7.2634e+06	1.04088e+07	6.75489e+06	9	9	7	7	9	9	10	10	7	10	10	9	9	7	7	9	9	10	10	7	10	10
Q9D8P4	27397	Mrpl17	TRUE	39S ribosomal protein L17, mitochondrial OS=Mus musculus OX=10090 GN=Mrpl17 PE=1 SV=1	36	8	59	8	28.989	131.23	8	20.2	4.44387e+06	7.62447e+06	8.83191e+06	7.28725e+06	8.77669e+06	2.12736e+07	20476654	3.15904e+07	3.95675e+07	3.57563e+07	1.95859e+07	7	7	7	7	7	7	8	8	8	8	8	7	7	7	7	7	7	8	8	8	8	8
O89023	12751	Tpp1	FALSE	Tripeptidyl-peptidase 1 OS=Mus musculus OX=10090 GN=Tpp1 PE=1 SV=2	28	7	59	7	42.075	201.98	7	61.3	4.88609e+06	1.74085e+07	2.1399e+07	1.5615e+07	6.43275e+06	2.87311e+07	1.6832e+07	3.8703e+07	2.56067e+07	2.69179e+07	2.58418e+07	5	6	7	5	5	7	6	6	5	7	6	5	6	7	5	5	7	6	6	5	7	6
P24721	11890	Asgr2	FALSE	Asialoglycoprotein receptor 2 OS=Mus musculus OX=10090 GN=Asgr2 PE=1 SV=1	34	7	59	7	28.398	145.33	7	34.9	1.59375e+06	1.68555e+07	1.97737e+07	1.48958e+07	2.46721e+06	1.54094e+07	2.45244e+06	6.55169e+06	5.60419e+06	8.03243e+06	1.08786e+07	4	7	7	7	5	7	6	6	4	6	6	4	7	7	7	5	7	6	6	4	6	6
P18828	20969	Sdc1	FALSE	Syndecan-1 OS=Mus musculus OX=10090 GN=Sdc1 PE=1 SV=1	14	6	59	6	34.302	172.42	6	32.9	9.08999e+06	1.13125e+07	1.15632e+07	1.33643e+07	1.50804e+07	9.83155e+06	9.75042e+06	7.7698e+06	1.11463e+07	7.65449e+06	1.21645e+07	6	6	6	6	6	6	6	6	6	6	6	6	6	6	6	6	6	6	6	6	6	6
Q60876	13685	Eif4ebp1	FALSE	Eukaryotic translation initiation factor 4E-binding protein 1 OS=Mus musculus OX=10090 GN=Eif4ebp1 PE=1 SV=3	85	7	58	7	34.114	161.41	7	12.3	1.67579e+06	930201	1.31339e+06	1.68326e+06	2.7988e+06	2.64018e+06	4.36531e+06	5.80232e+06	1.08118e+07	7.42298e+06	4.27775e+06	5	4	5	5	5	4	6	6	6	7	5	5	4	5	5	5	4	6	6	6	7	5
O09164	20657	Sod3	FALSE	Extracellular superoxide dismutase [Cu-Zn] OS=Mus musculus OX=10090 GN=Sod3 PE=1 SV=1	38	7	58	7	39.233	165.24	7	27.4	3.2367e+06	8.89363e+06	1.04342e+07	8.95467e+06	5060474	1.15317e+07	8.44495e+06	7.31682e+06	2.52111e+07	1.35001e+07	1.6925e+07	4	6	7	7	6	7	7	7	7	7	7	4	6	7	7	6	7	7	7	7	7	7
A2ALU4	110380	Shroom2	FALSE	Protein Shroom2 OS=Mus musculus OX=10090 GN=Shroom2 PE=1 SV=1	15	13	58	13	50.263	154.4	13	164.6	3.33444e+06	3.96983e+06	3.55766e+06	2.72653e+06	2.98622e+06	1.95188e+06	2.26753e+06	1.88434e+06	2.44967e+06	2.68201e+06	2.608e+06	13	11	12	10	10	8	10	8	8	10	8	13	11	12	10	10	8	10	8	8	10	8
P97300	20320	Nptn	FALSE	Neuroplastin OS=Mus musculus OX=10090 GN=Nptn PE=1 SV=3	19	6	58	6	34.323	155.52	6	44.3	6.23676e+06	6.57319e+06	8.96609e+06	9.74128e+06	9.34452e+06	11375455	6.71882e+06	7.76778e+06	1.80975e+07	1.23016e+07	1.61394e+07	6	6	6	6	6	6	6	6	6	6	6	6	6	6	6	6	6	6	6	6	6	6
O55003	12176	Bnip3	TRUE	BCL2/adenovirus E1B 19 kDa protein-interacting protein 3 OS=Mus musculus OX=10090 GN=Bnip3 PE=1 SV=1	37	7	58	7	26.703	131.95	7	21	1.10427e+07	8.47193e+06	1.13543e+07	9.33365e+06	1.57182e+07	6.79369e+06	1.06558e+07	1.40755e+07	1.24024e+07	1.09992e+07	1.43966e+07	7	7	7	7	7	7	7	7	6	7	7	7	7	7	7	7	7	7	7	6	7	7
Q9QUR7	23988	Pin1	FALSE	Peptidyl-prolyl cis-trans isomerase NIMA-interacting 1 OS=Mus musculus OX=10090 GN=Pin1 PE=1 SV=1	62	6	58	6	45.594	175.18	6	18.4	6.62147e+06	5.93852e+06	5.88752e+06	5.42075e+06	8.26506e+06	8.93184e+06	1.22478e+07	9.15791e+06	2.53789e+07	1.51863e+07	1.32152e+07	5	5	4	5	5	6	5	4	5	5	5	5	5	4	5	5	6	5	4	5	5	5
P20065	19241	Tmsb4x	FALSE	Thymosin beta-4 OS=Mus musculus OX=10090 GN=Tmsb4x PE=1 SV=1	50	7	58	6	31.791	158.78	7	5.7	3.20375e+07	3.41043e+07	3.91528e+07	5.44864e+07	4.08697e+07	3.62871e+07	4.29862e+07	4.60668e+07	9.21745e+07	2.98186e+07	3.76388e+07	5	5	5	6	4	4	6	6	7	6	6	5	5	5	6	4	4	6	6	7	6	6
O88811	56324	Stam2	FALSE	Signal transducing adapter molecule 2 OS=Mus musculus OX=10090 GN=Stam2 PE=1 SV=1	25	10	58	9	40.182	151.95	10	57.4	5.25022e+06	1.37344e+07	1.32403e+07	8.72545e+06	5.76394e+06	1.56489e+07	8.39132e+06	1.88941e+07	2.23376e+07	1.81279e+07	1.12221e+07	7	10	9	10	10	8	9	9	10	10	10	7	10	9	10	10	8	9	9	10	10	10
P70460	22323	Vasp	FALSE	Vasodilator-stimulated phosphoprotein OS=Mus musculus OX=10090 GN=Vasp PE=1 SV=4	29	10	58	10	42.159	175.24	10	39.6	5.13314e+06	5.29104e+06	4.33275e+06	5.5898e+06	4.87285e+06	4.36724e+06	5.51133e+06	5.23687e+06	1.16619e+07	7.58659e+06	1.22026e+07	8	8	8	8	8	8	8	8	10	9	9	8	8	8	8	8	8	8	8	10	9	9
Q8VCC2	12623	Ces1g	FALSE	Liver carboxylesterase 1 OS=Mus musculus OX=10090 GN=Ces1 PE=1 SV=1	10	6	57	4	25.471	158.17	6	62.6	8.28297e+06	1.08694e+07	1.05886e+07	1.32121e+07	1.14855e+07	7.10185e+06	7.10084e+06	8.08762e+06	1.30051e+07	1.07165e+07	1.93895e+07	6	6	6	6	6	6	6	6	5	6	6	6	6	6	6	6	6	6	6	5	6	6
Q8VCH0	235674	Acaa1b	TRUE	3-ketoacyl-CoA thiolase B, peroxisomal OS=Mus musculus OX=10090 GN=Acaa1b PE=1 SV=1	36	9	57	3	52.691	190.7	9	44	787460	2.52781e+06	2.62939e+06	1.57492e+06	2.45332e+06	2.27097e+06	716066	1.24421e+06	2.70071e+06	3.81279e+06	2.59573e+06	6	7	7	7	7	7	5	5	8	8	8	6	7	7	7	7	7	5	5	8	8	8
Q6Y685	320165	Tacc1	FALSE	Transforming acidic coiled-coil-containing protein 1 OS=Mus musculus OX=10090 GN=Tacc1 PE=1 SV=1	17	11	57	9	37.068	124.41	11	83.9	2.70033e+06	3.18422e+06	3.37631e+06	3.99081e+06	3.28275e+06	5.02847e+06	3.46727e+06	3.98558e+06	7.51856e+06	5.66923e+06	5.91999e+06	8	8	10	10	8	9	10	9	11	10	9	8	8	10	10	8	9	10	9	11	10	9
Q78IK2	66477	Atp5md	TRUE	ATP synthase membrane subunit K, mitochondrial OS=Mus musculus OX=10090 GN=Atp5mk PE=1 SV=1	47	4	57	4	21.159	191.73	4	6.4	9.44315e+06	6.75595e+06	7.11199e+06	7.09415e+06	1.60729e+07	1.42645e+07	2.89306e+07	2.74379e+07	2.22313e+07	2.00677e+07	1.59567e+07	4	4	4	4	4	4	4	4	4	4	4	4	4	4	4	4	4	4	4	4	4	4
Q91VW3	73723	Sh3bgrl3	FALSE	SH3 domain-binding glutamic acid-rich-like protein 3 OS=Mus musculus OX=10090 GN=Sh3bgrl3 PE=1 SV=1	41	5	57	5	23.113	144.14	5	10.5	2.00001e+07	2.29196e+07	2.15395e+07	3.03177e+07	2.14725e+07	3.75817e+07	2.81547e+07	2.44941e+07	6.06964e+07	4.411e+07	5.19003e+07	4	5	5	5	4	5	5	5	5	5	5	4	5	5	5	4	5	5	5	5	5	5
O54879	15354	Hmgb3	FALSE	High mobility group protein B3 OS=Mus musculus OX=10090 GN=Hmgb3 PE=1 SV=3	51	10	57	9	38.541	156.64	10	23	3.36882e+06	4.9586e+06	4.30998e+06	4.18561e+06	5247819	5.06326e+06	4.34847e+06	6.23236e+06	1.36267e+07	8.10581e+06	6.91773e+06	7	7	6	6	7	6	7	8	10	8	7	7	7	6	6	7	6	7	8	10	8	7
Q925J9	19014	Med1	FALSE	Mediator of RNA polymerase II transcription subunit 1 OS=Mus musculus OX=10090 GN=Med1 PE=1 SV=2	10	12	57	12	46.56	138.15	12	167	2.4392e+06	1.6233e+06	1.48721e+06	2.16039e+06	3.46236e+06	1.51887e+06	2.17674e+06	1.68646e+06	4.11154e+06	2.1015e+06	3.0559e+06	9	9	9	10	10	8	8	9	11	8	10	9	9	9	10	10	8	8	9	11	8	10
Q9QYI5	56812	Dnajb2	FALSE	DnaJ homolog subfamily B member 2 OS=Mus musculus OX=10090 GN=Dnajb2 PE=1 SV=3	30	8	57	7	30	173.46	8	35.6	4.33443e+06	6.25263e+06	6.27733e+06	6.00055e+06	6.0214e+06	4.56614e+06	3.04275e+06	4.62384e+06	3.36727e+06	3.39942e+06	7.78062e+06	7	8	8	8	8	8	6	8	6	7	8	7	8	8	8	8	8	6	8	6	7	8
Q63880	382053	Ces3a	FALSE	Carboxylesterase 3A OS=Mus musculus OX=10090 GN=Ces3a PE=1 SV=2	35	12	57	8	64.36	168.75	12	63.3	1.76834e+07	1.23064e+07	8.77771e+06	9.70553e+06	3.00493e+07	4.6445e+06	3.56224e+06	5.94476e+06	1.75508e+06	702391	6.39671e+06	10	10	10	11	10	7	7	7	3	2	7	10	10	10	11	10	7	7	7	3	2	7
Q61559	14132	Fcgrt	FALSE	IgG receptor FcRn large subunit p51 OS=Mus musculus OX=10090 GN=Fcgrt PE=1 SV=1	26	9	57	9	39.291	141.8	9	40.1	5.42178e+06	1.07851e+07	1.30962e+07	1.48948e+07	1.10085e+07	1.07754e+07	5.16709e+06	9.02422e+06	1.50262e+07	9.46005e+06	1.54467e+07	6	7	8	7	7	6	5	7	8	6	7	6	7	8	7	7	6	5	7	8	6	7
Q8K310	17184	Matr3	FALSE	Matrin-3 OS=Mus musculus OX=10090 GN=Matr3 PE=1 SV=1	16	9	57	9	41.876	180.53	9	94.6	5.91092e+06	7422506	6.51277e+06	5.23952e+06	6.36004e+06	3.49234e+06	5.43565e+06	4.59701e+06	7.04857e+06	6.14182e+06	6.72867e+06	8	8	7	8	8	7	6	7	7	8	8	8	8	7	8	8	7	6	7	7	8	8
Q8K124	102595	Plekho2	FALSE	Pleckstrin homology domain-containing family O member 2 OS=Mus musculus OX=10090 GN=Plekho2 PE=1 SV=1	24	8	57	8	29.466	167.98	8	53.8	2.64344e+06	3.26751e+06	2.81478e+06	3.43038e+06	2.00715e+06	4.22247e+06	3.33819e+06	4.27839e+06	6.04415e+06	5.08202e+06	7.21846e+06	7	8	8	7	6	8	8	8	8	8	8	7	8	8	7	6	8	8	8	8	8	8
Q8R344	72654	Ccdc12	FALSE	Coiled-coil domain-containing protein 12 OS=Mus musculus OX=10090 GN=Ccdc12 PE=1 SV=2	48	8	56	8	32.216	168.51	8	18.9	1.04062e+07	6.28035e+06	5.53026e+06	7.35612e+06	1.04781e+07	4.27426e+06	7.39908e+06	5.91293e+06	1.48086e+07	8.38568e+06	1.17443e+07	8	8	8	8	8	7	8	8	8	8	8	8	8	8	8	8	7	8	8	8	8	8
Q9D1K2	66144	Atp6v1f	FALSE	V-type proton ATPase subunit F OS=Mus musculus OX=10090 GN=Atp6v1f PE=1 SV=2	76	8	56	8	44.499	174.77	8	13.4	1.68678e+06	4.25807e+06	4.35108e+06	4.41644e+06	2.711e+06	1.01338e+07	5.02768e+06	6.59053e+06	1.14001e+07	1.98725e+07	9.57413e+06	6	8	7	8	7	7	7	7	8	8	8	6	8	7	8	7	7	7	7	8	8	8
P24369	19035	Ppib	FALSE	Peptidyl-prolyl cis-trans isomerase B OS=Mus musculus OX=10090 GN=Ppib PE=1 SV=2	47	11	56	11	41.092	145.24	11	23.7	9.24863e+06	1.03197e+07	1.21492e+07	1.47081e+07	1.44347e+07	1.07645e+07	6.23134e+06	8.04254e+06	1.10399e+07	9.88515e+06	1.25329e+07	9	8	10	11	9	9	9	7	8	9	9	9	8	10	11	9	9	9	7	8	9	9
O88983	55943	Stx8	FALSE	Syntaxin-8 OS=Mus musculus OX=10090 GN=Stx8 PE=1 SV=1	37	9	56	9	36.219	138.78	9	26.9	1.00514e+07	1.12256e+07	1.19085e+07	1.0979e+07	1.18914e+07	1.011e+07	1.02867e+07	9.13499e+06	1.73685e+07	1.10567e+07	1.25089e+07	8	8	7	8	8	7	8	7	9	8	7	8	8	7	8	8	7	8	7	9	8	7
Q62376	20637	Snrnp70	FALSE	U1 small nuclear ribonucleoprotein 70 kDa OS=Mus musculus OX=10090 GN=Snrnp70 PE=1 SV=2	35	10	56	10	38.236	138.69	10	52	2.20938e+06	2.92394e+06	2.02641e+06	1869539	3.11349e+06	4.16668e+06	1.64417e+06	2.44965e+06	6.21622e+06	4.86494e+06	5.0345e+06	8	9	8	8	9	9	8	8	9	8	8	8	9	8	8	9	9	8	8	9	8	8
Q9DBR0	56399	Akap8	FALSE	A-kinase anchor protein 8 OS=Mus musculus OX=10090 GN=Akap8 PE=1 SV=1	27	13	56	13	49.942	131.14	13	76.2	4.139e+06	5.01024e+06	4.95245e+06	4.00447e+06	4.91536e+06	6.54281e+06	4.77926e+06	5.94462e+06	1.10794e+07	7.71943e+06	7.4189e+06	12	11	10	10	10	10	12	11	12	12	11	12	11	10	10	10	10	12	11	12	12	11
Q04750	21969	Top1	FALSE	DNA topoisomerase 1 OS=Mus musculus OX=10090 GN=Top1 PE=1 SV=2	8	8	56	8	35.165	160.66	8	90.8	6.9223e+06	4.81225e+06	2.8467e+06	4.60991e+06	7.30379e+06	3.87528e+06	4.12593e+06	4.07422e+06	5.69769e+06	4.88307e+06	8.63113e+06	8	8	7	8	8	7	8	7	7	7	8	8	8	7	8	8	7	8	7	7	7	8
Q3TLD5	19777	Uri1	FALSE	Unconventional prefoldin RPB5 interactor OS=Mus musculus OX=10090 GN=Uri1 PE=1 SV=2	24	9	56	9	37.069	163.18	9	59	4.3275e+06	3.2988e+06	2.97368e+06	2.90668e+06	5.28367e+06	3.63608e+06	5.9926e+06	5.02178e+06	1.00008e+07	6.08078e+06	5.96374e+06	9	8	8	8	8	8	9	8	9	9	9	9	8	8	8	8	8	9	8	9	9	9
P97352	20196	S100a13	FALSE	Protein S100-A13 OS=Mus musculus OX=10090 GN=S100a13 PE=1 SV=1	42	7	56	7	28.935	151.92	7	11.2	1.57562e+07	2.86722e+07	2.46102e+07	2.64699e+07	2.22824e+07	2.16993e+07	1.51113e+07	2.71911e+07	2.61322e+07	2.44309e+07	2.92514e+07	5	7	6	6	7	6	7	7	7	7	7	5	7	6	6	7	6	7	7	7	7	7
Q91WE2	102122	Psme3ip1	FALSE	PSME3-interacting protein OS=Mus musculus OX=10090 GN=Psme3ip1 PE=1 SV=1	35	13	56	13	44.072	137.73	13	28.7	1.00027e+07	7.86329e+06	8.18936e+06	9.47776e+06	1.27479e+07	7.09835e+06	8.8512e+06	8.38956e+06	1.8277e+07	1.05061e+07	1.44222e+07	11	11	11	11	11	11	10	11	12	10	10	11	11	11	11	11	11	10	11	12	10	10
Q8CH18	67500	Ccar1	FALSE	Cell division cycle and apoptosis regulator protein 1 OS=Mus musculus OX=10090 GN=Ccar1 PE=1 SV=1	8	7	56	7	25.533	129.86	7	132	5.16946e+06	3.77162e+06	3.48903e+06	3.60107e+06	5.87882e+06	2.58748e+06	1.83863e+06	3.17201e+06	5.98426e+06	3.17841e+06	6.39165e+06	7	5	5	7	7	5	4	6	7	6	6	7	5	5	7	7	5	4	6	7	6	6
P06797	13039	Ctsl	FALSE	Procathepsin L OS=Mus musculus OX=10090 GN=Ctsl PE=1 SV=2	31	5	56	5	31.444	177.27	5	37.5	2.09994e+06	2.88442e+06	2.76043e+06	4.03167e+06	2.74688e+06	4.43549e+06	6.55137e+06	7.47373e+06	1.16957e+07	1.25773e+07	6.24363e+06	4	4	5	4	3	5	5	5	5	5	4	4	4	5	4	3	5	5	5	5	5	4
Q9CY57	66511	Chtop	FALSE	Chromatin target of PRMT1 protein OS=Mus musculus OX=10090 GN=Chtop PE=1 SV=2	31	6	56	6	28.834	167.25	6	26.6	1.04229e+06	4.26279e+06	4.14537e+06	3.04868e+06	2.4924e+06	3.27194e+06	2.17812e+06	4.44147e+06	5.93288e+06	5.40805e+06	3.6934e+06	4	6	5	6	4	5	5	6	6	4	5	4	6	5	6	4	5	5	6	6	4	5
P21619	16907	Lmnb2	FALSE	Lamin-B2 OS=Mus musculus OX=10090 GN=Lmnb2 PE=1 SV=2	32	16	56	13	49.284	140.53	16	67.3	8.79083e+06	2.02035e+07	1.67712e+07	2.11759e+07	8.0871e+06	4.98304e+07	1.04928e+07	1.26458e+07	1.8637e+07	2.24462e+07	2.07291e+07	12	15	14	13	13	12	8	10	10	12	12	12	15	14	13	13	12	8	10	10	12	12
Q01147	12912	Creb1	FALSE	Cyclic AMP-responsive element-binding protein 1 OS=Mus musculus OX=10090 GN=Creb1 PE=1 SV=2	18	5	56	3	25.953	173.79	5	35.1	1.09017e+07	9.71421e+06	8.50768e+06	1.05567e+07	1.40305e+07	6.51395e+06	8533191	8.7484e+06	1.73096e+07	8.80258e+06	1.51743e+07	5	5	5	5	5	5	5	5	5	5	5	5	5	5	5	5	5	5	5	5	5	5
Q9JKF6	58235	Nectin1	FALSE	Nectin-1 OS=Mus musculus OX=10090 GN=Nectin1 PE=1 SV=3	19	7	55	7	34.618	152.91	7	57	4.08059e+06	6.60248e+06	9.07622e+06	7.31416e+06	5.65313e+06	6.38425e+06	3.8478e+06	5512821	7.7641e+06	8.15463e+06	1.13395e+07	6	6	6	7	5	6	5	5	6	6	7	6	6	6	7	5	6	5	5	6	6	7
Q9WUM5	56451	Suclg1	TRUE	Succinate--CoA ligase [ADP/GDP-forming] subunit alpha, mitochondrial OS=Mus musculus OX=10090 GN=Suclg1 PE=1 SV=4	18	4	55	4	39.564	195.23	4	36.1	2.5976e+06	2.63779e+06	2.66805e+06	3.00339e+06	4.92086e+06	5.41315e+06	4.72516e+06	7.80667e+06	8.8444e+06	9.12784e+06	6.82045e+06	4	4	4	4	4	4	4	4	4	4	4	4	4	4	4	4	4	4	4	4	4	4
Q63836	20342	Selenbp2	FALSE	Selenium-binding protein 2 OS=Mus musculus OX=10090 GN=Selenbp2 PE=1 SV=2	31	13	55	13	49.293	140.26	13	52.6	4.54259e+07	1.25576e+07	1.57126e+07	1.50446e+07	4.59775e+07	1.08193e+07	1.36011e+07	1.91771e+07	9.61995e+06	9.17343e+06	1.62745e+07	13	9	9	9	13	8	10	10	8	8	8	13	9	9	9	13	8	10	10	8	8	8
Q8K3W3	192160	Casc3	FALSE	Protein CASC3 OS=Mus musculus OX=10090 GN=Casc3 PE=1 SV=3	20	12	55	12	45.215	167.15	12	75.7	4.50401e+06	3.26144e+06	2.76448e+06	3.35194e+06	5.01122e+06	2.6834e+06	4.0384e+06	4.06631e+06	7.80911e+06	5.32337e+06	6.19947e+06	12	9	9	10	11	8	12	11	11	10	10	12	9	9	10	11	8	12	11	11	10	10
Q9Z266	20615	Snapin	FALSE	SNARE-associated protein Snapin OS=Mus musculus OX=10090 GN=Snapin PE=1 SV=1	74	7	55	7	28.769	190.74	7	14.9	4.37778e+06	4.77891e+06	4.89943e+06	4.98071e+06	6.52779e+06	6.34137e+06	5.95188e+06	6.91258e+06	1.18874e+07	8.27546e+06	7.81975e+06	5	6	6	7	7	7	7	7	7	7	7	5	6	6	7	7	7	7	7	7	7	7
P70445	13688	Eif4ebp2	FALSE	Eukaryotic translation initiation factor 4E-binding protein 2 OS=Mus musculus OX=10090 GN=Eif4ebp2 PE=1 SV=1	86	6	55	6	27.349	177.83	6	12.9	7.22355e+06	7.04526e+06	7.21737e+06	8.36367e+06	9.62589e+06	3.14179e+06	3.74161e+06	3.1848e+06	5.91771e+06	4.68758e+06	7.06537e+06	6	4	5	5	5	5	5	4	3	5	5	6	4	5	5	5	5	5	4	3	5	5
Q60772	12580	Cdkn2c	FALSE	Cyclin-dependent kinase 4 inhibitor C OS=Mus musculus OX=10090 GN=Cdkn2c PE=1 SV=1	54	6	55	6	28.128	155.37	6	18.1	791891	3.88954e+06	4.58969e+06	4.54529e+06	1.76493e+06	2.96989e+06	2.67942e+06	3.0698e+06	6.71795e+06	5.52484e+06	7.61977e+06	5	5	6	6	6	5	6	5	6	6	6	5	5	6	6	6	5	6	5	6	6	6
Q9CZA6	67203	Nde1	FALSE	Nuclear distribution protein nudE homolog 1 OS=Mus musculus OX=10090 GN=Nde1 PE=1 SV=1	35	10	55	7	36.298	162.72	10	38.5	2.88491e+06	1.79251e+06	2.29904e+06	2.28939e+06	3.75769e+06	1.0128e+06	1.07403e+06	1.14588e+06	1.05101e+06	833362	3.54587e+06	10	8	9	9	10	8	8	8	8	7	10	10	8	9	9	10	8	8	8	8	7	10
Q8BP67	68193	Rpl24	FALSE	60S ribosomal protein L24 OS=Mus musculus OX=10090 GN=Rpl24 PE=1 SV=2	29	5	55	5	20.048	146.63	5	17.8	3.67458e+06	6.05937e+06	5.89049e+06	6.14392e+06	6.47474e+06	4.3683e+06	3.78221e+06	5.60105e+06	1.07357e+07	8.39334e+06	7.74309e+06	4	4	4	5	4	4	4	4	5	5	5	4	4	4	5	4	4	4	4	5	5	5
O54988	20874	Slk	FALSE	STE20-like serine/threonine-protein kinase OS=Mus musculus OX=10090 GN=Slk PE=1 SV=2	22	16	55	16	62.342	156.61	16	141.4	4.42709e+06	3.44706e+06	2.88378e+06	3.67256e+06	3.05545e+06	2.46872e+06	3.20108e+06	3.2498e+06	4.75309e+06	4.13265e+06	6.01522e+06	12	12	11	14	12	10	13	12	10	11	11	12	12	11	14	12	10	13	12	10	11	11
Q80WR5	97159	A430005L14Rik	FALSE	UPF0688 protein C1orf174 homolog OS=Mus musculus OX=10090 PE=1 SV=1	61	9	55	9	38.053	155.07	9	24.8	8.16332e+06	6.19551e+06	5.69033e+06	6.27965e+06	8.67608e+06	3.07366e+06	4.96131e+06	5.27376e+06	7.36703e+06	4.64286e+06	8.09183e+06	7	7	8	7	7	5	8	7	8	7	7	7	7	8	7	7	5	8	7	8	7	7
O09159	17159	Man2b1	FALSE	Lysosomal alpha-mannosidase OS=Mus musculus OX=10090 GN=Man2b1 PE=1 SV=4	12	10	55	10	37.376	152.72	10	114.6	8.03777e+06	8.8302e+06	1.31231e+07	1.08851e+07	1.29634e+07	9.27665e+06	8.72258e+06	1.18684e+07	1.78249e+07	1.22751e+07	1.74941e+07	7	9	10	9	9	8	9	9	9	9	9	7	9	10	9	9	8	9	9	9	9	9
P11688	16402	Itga5	FALSE	Integrin alpha-5 OS=Mus musculus OX=10090 GN=Itga5 PE=1 SV=3	11	9	55	9	31.784	140.13	9	115	1.96309e+06	5.08104e+06	6.57239e+06	7.20743e+06	2.4215e+06	1.08234e+07	3.42094e+06	6.44791e+06	8.80588e+06	8.7185e+06	9.0678e+06	5	6	8	8	5	8	7	6	6	8	7	5	6	8	8	5	8	7	6	6	8	7
Q3UBX0	68539	Tmem109	FALSE	Transmembrane protein 109 OS=Mus musculus OX=10090 GN=Tmem109 PE=1 SV=2	13	4	55	4	19.449	158.09	4	26.3	3.68008e+07	2.38812e+07	2.35173e+07	2.74442e+07	5.31241e+07	1.83451e+07	3.22543e+07	2.56872e+07	2.26054e+07	1.95571e+07	3.85314e+07	4	4	4	4	4	4	4	4	4	4	4	4	4	4	4	4	4	4	4	4	4	4
P56183	18114	Rrp1	FALSE	Ribosomal RNA processing protein 1 homolog A OS=Mus musculus OX=10090 GN=Rrp1 PE=1 SV=2	31	10	55	10	35.425	178.9	10	54.7	1.74583e+06	2.31437e+06	2.30338e+06	1.35324e+06	1.44821e+06	3.57614e+06	3.33455e+06	3.33958e+06	6.3782e+06	4.2577e+06	3.06596e+06	7	7	8	7	7	9	8	9	10	9	9	7	7	8	7	7	9	8	9	10	9	9
Q9D172	28295	Gatd3a	TRUE	Glutamine amidotransferase-like class 1 domain-containing protein 3, mitochondrial OS=Mus musculus OX=10090 GN=Gatd3 PE=1 SV=1	34	7	54	7	29.687	170.66	7	28.1	7.30019e+06	7.11413e+06	6.01587e+06	5.24631e+06	8.08828e+06	1.01195e+07	1.00663e+07	1.44329e+07	1.51998e+07	1.73111e+07	1.00531e+07	7	6	7	6	6	7	7	7	6	7	6	7	6	7	6	6	7	7	7	6	7	6
Q3TEA8	15441	Hp1bp3	FALSE	Heterochromatin protein 1-binding protein 3 OS=Mus musculus OX=10090 GN=Hp1bp3 PE=1 SV=1	25	11	54	11	39.814	145.07	11	60.8	1.90684e+06	9.40091e+06	9.96304e+06	4.79376e+06	3.19371e+06	4.75868e+06	2.17564e+06	4.71595e+06	5.72698e+06	6.17968e+06	6.59937e+06	5	9	9	9	7	8	6	10	9	9	8	5	9	9	9	7	8	6	10	9	9	8
Q61696	193740	Hspa1a	FALSE	Heat shock 70 kDa protein 1A OS=Mus musculus OX=10090 GN=Hspa1a PE=1 SV=2	14	7	54	3	29.295	131.18	7	70	933032	645648	846534	693436	928745	462940	240984	207555	472259	517243	1.00081e+06	6	6	7	6	6	6	6	6	6	6	6	6	6	7	6	6	6	6	6	6	6	6
P08122	12827	Col4a2	FALSE	Collagen alpha-2(IV) chain OS=Mus musculus OX=10090 GN=Col4a2 PE=1 SV=4	5	7	54	7	22.538	131.36	7	167.2	6.63931e+06	4.54751e+06	6.85668e+06	9.73067e+06	1.83218e+07	7.50306e+06	7.37569e+06	1.04328e+07	2.27609e+07	1.01758e+07	1.65318e+07	6	6	6	7	7	6	6	6	6	6	6	6	6	6	7	7	6	6	6	6	6	6
Q9D4H2	74375	Gcc1	FALSE	GRIP and coiled-coil domain-containing protein 1 OS=Mus musculus OX=10090 GN=Gcc1 PE=1 SV=2	21	12	54	12	39.527	145.57	12	87.6	3.47665e+06	4.31683e+06	4.59886e+06	3.43109e+06	3.04939e+06	3.24835e+06	2.63419e+06	3.15944e+06	4.05747e+06	4.12861e+06	5.5191e+06	8	10	11	10	10	11	9	11	8	10	10	8	10	11	10	10	11	9	11	8	10	10
Q8BFR5	233870	Tufm	TRUE	Elongation factor Tu, mitochondrial OS=Mus musculus OX=10090 GN=Tufm PE=1 SV=1	21	7	54	7	32.998	155.65	7	49.5	4.51954e+06	3.69398e+06	3.41949e+06	4.10678e+06	4.60026e+06	7.86718e+06	1.09063e+07	1.01698e+07	1.28858e+07	1.34935e+07	8.16634e+06	5	6	5	5	5	7	5	6	6	7	6	5	6	5	5	5	7	5	6	6	7	6
Q9CR68	66694	Uqcrfs1	TRUE	Cytochrome b-c1 complex subunit Rieske, mitochondrial OS=Mus musculus OX=10090 GN=Uqcrfs1 PE=1 SV=1	35	7	54	7	22.416	162.08	7	29.3	1.49555e+07	1.56939e+07	2.24896e+07	1.78331e+07	3.48752e+07	4.80575e+07	5.03866e+07	8.44722e+07	7.93745e+07	6.10767e+07	3.81808e+07	5	5	5	5	5	6	6	6	6	6	6	5	5	5	5	5	6	6	6	6	6	6
O88952	22343	Lin7c	FALSE	Protein lin-7 homolog C OS=Mus musculus OX=10090 GN=Lin7c PE=1 SV=2	39	6	54	3	27.722	134.61	6	21.8	156290	1.29764e+06	1.51845e+06	838917	383909	3.12636e+06	986044	1.50069e+06	3.39404e+06	3.83675e+06	1.34028e+06	4	6	6	5	5	6	6	6	6	6	5	4	6	6	5	5	6	6	6	6	6	5
Q9R1Z7	19286	Pts	FALSE	6-pyruvoyl tetrahydrobiopterin synthase OS=Mus musculus OX=10090 GN=Pts PE=1 SV=2	83	9	54	9	32.167	137.28	9	16.2	6.34731e+06	1.03682e+07	9.53194e+06	8.70603e+06	7.7242e+06	7.55223e+06	5.15672e+06	8.56905e+06	11704544	9.42984e+06	1.27172e+07	8	8	8	8	8	8	8	9	7	8	8	8	8	8	8	8	8	8	9	7	8	8
Q9CWW6	69713	Pin4	FALSE	Peptidyl-prolyl cis-trans isomerase NIMA-interacting 4 OS=Mus musculus OX=10090 GN=Pin4 PE=1 SV=1	55	6	54	6	28.206	146.25	6	13.8	4.65053e+06	5.19444e+06	4.24949e+06	3.6408e+06	6.65586e+06	3.25289e+06	3.66596e+06	4.61298e+06	1.16312e+07	4.11091e+06	5.80472e+06	6	6	6	6	6	6	6	6	6	6	6	6	6	6	6	6	6	6	6	6	6	6
P35951	16835	Ldlr	FALSE	Low-density lipoprotein receptor OS=Mus musculus OX=10090 GN=Ldlr PE=1 SV=2	18	11	54	11	40.758	144.45	11	94.9	1.24732e+06	1.313e+07	9.22091e+06	3.48719e+06	1.38564e+06	1.34219e+07	3.68438e+06	7.89201e+06	3.18819e+06	1.57586e+07	5.93684e+06	8	10	11	8	6	11	10	10	7	11	10	8	10	11	8	6	11	10	10	7	11	10
Q9DB77	67003	Uqcrc2	TRUE	Cytochrome b-c1 complex subunit 2, mitochondrial OS=Mus musculus OX=10090 GN=Uqcrc2 PE=1 SV=1	18	6	54	6	27.914	175.05	6	48.2	3.60931e+06	3.18109e+06	2.87514e+06	3.5598e+06	5.54141e+06	9.51317e+06	1.06133e+07	1.3493e+07	1.34956e+07	1.10715e+07	9.99091e+06	6	6	5	5	5	6	6	6	5	6	5	6	6	5	5	5	6	6	6	5	6	5
Q8VCQ3	641340	Nrbf2	FALSE	Nuclear receptor-binding factor 2 OS=Mus musculus OX=10090 GN=Nrbf2 PE=1 SV=1	53	9	54	9	44.695	171.14	9	32.5	3.80613e+06	2.82301e+06	2.66563e+06	2.94657e+06	4.53337e+06	2313227	3.31544e+06	3.3165e+06	4.6723e+06	3.16097e+06	5.76604e+06	7	6	6	7	7	5	8	6	7	6	8	7	6	6	7	7	5	8	6	7	6	8
Q9CZU6	12974	Cs	TRUE	Citrate synthase, mitochondrial OS=Mus musculus OX=10090 GN=Cs PE=1 SV=1	21	10	54	10	32.496	143.64	10	51.7	941375	2.96645e+06	3.29169e+06	1.6564e+06	1.64535e+06	1.1199e+07	3.18487e+06	6.80101e+06	4.7602e+06	1.90756e+07	4.3555e+06	6	8	7	6	7	9	7	8	7	10	7	6	8	7	6	7	9	7	8	7	10	7
P47955	56040	Rplp1	FALSE	60S acidic ribosomal protein P1 OS=Mus musculus OX=10090 GN=Rplp1 PE=1 SV=1	82	5	54	5	23.959	227.05	5	11.5	2.92152e+07	6.65281e+07	78740187	8.16643e+07	4.5044e+07	9.69809e+07	4.35418e+07	6.24012e+07	1.23628e+08	9.40762e+07	8.67685e+07	4	4	4	5	5	5	4	4	4	4	4	4	4	4	5	5	5	4	4	4	4	4
P14824	11749	Anxa6	FALSE	Annexin A6 OS=Mus musculus OX=10090 GN=Anxa6 PE=1 SV=3	17	9	53	9	33.929	137.91	9	75.8	1.15596e+06	3.3941e+06	3.50409e+06	3.03221e+06	2.59236e+06	4.12427e+06	1.8915e+06	2.67265e+06	3.1477e+06	4.04857e+06	3.68827e+06	6	9	9	9	6	9	7	7	6	8	8	6	9	9	9	6	9	7	7	6	8	8
G5E8K5	11735	Ank3	FALSE	Ankyrin-3 OS=Mus musculus OX=10090 GN=Ank3 PE=1 SV=1	5	7	53	7	27.883	143.99	7	213.9	3.26305e+06	2.43659e+06	1.7785e+06	1.83226e+06	3.75314e+06	4.2745e+06	5.58359e+06	5.38998e+06	5.11021e+06	6.9123e+06	6.41585e+06	6	6	5	4	6	7	6	6	6	7	6	6	6	5	4	6	7	6	6	6	7	6
P35486	18597	Pdha1	TRUE	Pyruvate dehydrogenase E1 component subunit alpha, somatic form, mitochondrial OS=Mus musculus OX=10090 GN=Pdha1 PE=1 SV=1	27	11	53	11	49.925	155.36	11	43.2	2.46264e+06	2.63527e+06	3.55407e+06	3.87676e+06	5.76184e+06	9.84716e+06	1.04932e+07	1.38483e+07	2.53502e+07	2.55867e+07	1.28002e+07	8	7	9	9	9	10	10	10	10	11	9	8	7	9	9	9	10	10	10	10	11	9
P99029	54683	Prdx5	TRUE	Peroxiredoxin-5, mitochondrial OS=Mus musculus OX=10090 GN=Prdx5 PE=1 SV=2	45	9	53	9	34.738	148.94	9	21.9	4.44836e+06	8.44693e+06	7.863e+06	6.07974e+06	9.34165e+06	1.19733e+07	8.18575e+06	1.27711e+07	1.28345e+07	1.50852e+07	7.12876e+06	7	9	9	9	9	8	9	9	9	9	9	7	9	9	9	9	8	9	9	9	9	9
Q61464	18139	Zfp638	FALSE	Zinc finger protein 638 OS=Mus musculus OX=10090 GN=Znf638 PE=1 SV=2	8	11	53	11	44.896	139.65	11	218	2.34001e+06	1.99645e+06	2.01881e+06	2.35411e+06	2.85424e+06	1.90108e+06	2.52006e+06	2.44374e+06	2.25169e+06	2.73056e+06	2.69409e+06	8	8	9	8	7	8	8	6	5	8	6	8	8	9	8	7	8	8	6	5	8	6
Q8VDM6	232989	Hnrnpul1	FALSE	Heterogeneous nuclear ribonucleoprotein U-like protein 1 OS=Mus musculus OX=10090 GN=Hnrnpul1 PE=1 SV=1	11	6	53	6	28.481	158.57	6	95.9	2.60516e+06	2.25587e+06	1.85198e+06	2.35889e+06	2.73796e+06	1.82351e+06	2.0708e+06	2.20874e+06	3.50797e+06	2.92356e+06	5.03858e+06	6	5	5	5	6	4	4	6	5	5	5	6	5	5	5	6	4	4	6	5	5	5
Q9JIH2	18141	Nup50	FALSE	Nuclear pore complex protein Nup50 OS=Mus musculus OX=10090 GN=Nup50 PE=1 SV=3	26	9	53	9	35.828	138.27	9	49.5	3.11946e+06	3.52347e+06	3.1446e+06	2.80877e+06	3.87625e+06	2.93853e+06	2.2943e+06	2.99298e+06	4.85686e+06	3.80242e+06	5.17462e+06	8	8	7	7	6	8	7	7	7	7	7	8	8	7	7	6	8	7	7	7	7	7
P68369	22142	Tuba1a	FALSE	Tubulin alpha-1A chain OS=Mus musculus OX=10090 GN=Tuba1a PE=1 SV=1	25	8	53	4	31.504	145.13	8	50.1	7.50665e+06	9.15323e+06	1.02472e+07	8.0652e+06	6.16079e+06	1.65356e+07	1.05941e+07	9.23149e+06	1.1258e+07	1.9675e+07	1.47982e+07	5	7	8	4	4	7	5	4	5	6	5	5	7	8	4	4	7	5	4	5	6	5
P09602	15331	Hmgn2	FALSE	Non-histone chromosomal protein HMG-17 OS=Mus musculus OX=10090 GN=Hmgn2 PE=1 SV=2	61	6	53	6	22.841	138.23	6	9.4	2.80572e+06	3.23598e+06	2.34754e+06	7.18471e+06	6.24677e+06	3.78817e+06	3.75265e+06	4.04118e+06	1.47355e+07	4.81315e+06	6.21233e+06	4	4	4	6	3	4	5	4	6	5	5	4	4	4	6	3	4	5	4	6	5	5
Q9D8Z2	69076	Triap1	TRUE	TP53-regulated inhibitor of apoptosis 1 OS=Mus musculus OX=10090 GN=Triap1 PE=1 SV=1	76	7	53	7	35.958	137.08	7	8.8	4934730	3.47534e+06	2.89266e+06	4.41417e+06	5.84567e+06	7.77745e+06	1.15862e+07	1.14083e+07	1.49786e+07	1.32879e+07	8.53967e+06	5	5	5	5	5	5	5	5	7	5	5	5	5	5	5	5	5	5	5	7	5	5
O70250	56012	Pgam2	FALSE	Phosphoglycerate mutase 2 OS=Mus musculus OX=10090 GN=Pgam2 PE=1 SV=3	25	7	53	3	33.151	146.36	7	28.8						2.86837e+06		101660	72257.3			4	4	4	4	4	7	4	5	5	4	4	4	4	4	4	4	7	4	5	5	4	4
P46467	20479	Vps4b	FALSE	Vacuolar protein sorting-associated protein 4B OS=Mus musculus OX=10090 GN=Vps4b PE=1 SV=2	36	12	52	9	46.28	135.92	12	49.4	265974	7.58501e+06	7.05627e+06	4.71011e+06	633539	6.89201e+06	1.35806e+06	3.65882e+06	3.63345e+06	6.97586e+06	3.87954e+06	2	10	9	9	3	10	7	8	7	10	7	2	10	9	9	3	10	7	8	7	10	7
P0C7L0	330319	Wipf3	FALSE	WAS/WASL-interacting protein family member 3 OS=Mus musculus OX=10090 GN=Wipf3 PE=1 SV=1	28	10	52	10	34.574	137.43	10	49.4	2.65293e+06	2.76348e+06	2.85685e+06	2.87861e+06	3.48538e+06	6187490	1.06777e+07	8.43858e+06	1.27069e+07	1.25885e+07	9.37071e+06	7	9	8	8	8	8	10	9	9	9	8	7	9	8	8	8	8	10	9	9	9	8
Q9ESU6	57261	Brd4	FALSE	Bromodomain-containing protein 4 OS=Mus musculus OX=10090 GN=Brd4 PE=1 SV=2	14	16	52	14	50.839	122.79	16	155.8	5.30089e+06	3.69922e+06	4.44015e+06	3.91137e+06	5.5409e+06	2.67681e+06	3.4655e+06	3.41825e+06	6.93389e+06	4.44283e+06	7.30719e+06	12	12	12	13	12	9	12	13	14	11	13	12	12	12	13	12	9	12	13	14	11	13
Q9WU79	19125	Prodh	TRUE	Proline dehydrogenase 1, mitochondrial OS=Mus musculus OX=10090 GN=Prodh PE=1 SV=2	16	6	52	6	39.297	179.33	6	68	3.30318e+06	9.00719e+06	6.39389e+06	4.37227e+06	4.19986e+06	1.34911e+07	1.29493e+07	1.80688e+07	1.27511e+07	2.34393e+07	1.42272e+07	5	5	5	5	5	6	5	5	4	5	5	5	5	5	5	5	6	5	5	4	5	5
Q9CQJ6	68184	Denr	FALSE	Density-regulated protein OS=Mus musculus OX=10090 GN=Denr PE=1 SV=1	40	8	52	8	31.419	149.25	8	22.2	2.73319e+06	5.17018e+06	5.77528e+06	5.11122e+06	3.09977e+06	5.21412e+06	3.74481e+06	4.54713e+06	7.21211e+06	8.60292e+06	7.53929e+06	6	7	7	7	5	7	7	7	8	8	7	6	7	7	7	5	7	7	7	8	8	7
Q91VM9	74776	Ppa2	TRUE	Inorganic pyrophosphatase 2, mitochondrial OS=Mus musculus OX=10090 GN=Ppa2 PE=1 SV=1	46	12	52	12	54.705	153.32	12	38.1	1.16961e+06	3.88179e+06	4.81609e+06	2.37071e+06	2.08359e+06	1.23184e+07	4.48544e+06	1.03752e+07	9.42947e+06	1.68659e+07	5.19446e+06	6	11	11	8	7	11	10	11	12	12	10	6	11	11	8	7	11	10	11	12	12	10
Q8R1B4	56347	Eif3c	FALSE	Eukaryotic translation initiation factor 3 subunit C OS=Mus musculus OX=10090 GN=Eif3c PE=1 SV=1	7	8	52	8	30.789	142.2	8	105.5	6.68212e+06	8.70252e+06	7.46308e+06	6.00091e+06	1.01925e+07	7.15422e+06	4.34425e+06	6290215	1.22068e+07	1.01528e+07	1.11266e+07	7	7	8	8	8	7	7	8	7	7	7	7	7	8	8	8	7	7	8	7	7	7
Q99J36	233802	Thumpd1	FALSE	THUMP domain-containing protein 1 OS=Mus musculus OX=10090 GN=Thumpd1 PE=1 SV=1	31	10	52	10	32.62	136.25	10	38.9	697946	3.16967e+06	3.26376e+06	2.79783e+06	641459	6.01487e+06	3.58618e+06	4.82109e+06	8.39596e+06	7.84319e+06	4.70098e+06	3	7	7	8	4	9	9	8	8	9	8	3	7	7	8	4	9	9	8	8	9	8
P40142	21881	Tkt	FALSE	Transketolase OS=Mus musculus OX=10090 GN=Tkt PE=1 SV=1	23	8	52	8	34.264	163.44	8	67.6	3.09083e+06	4.26301e+06	5.78355e+06	6.44755e+06	7.04174e+06	4.65559e+06	4.14294e+06	5.34441e+06	6.96628e+06	6.26089e+06	6.19245e+06	6	5	8	6	5	5	5	5	6	6	6	6	5	8	6	5	5	5	5	6	6	6
Q64191	11593	Aga	FALSE	N(4)-(beta-N-acetylglucosaminyl)-L-asparaginase OS=Mus musculus OX=10090 GN=Aga PE=1 SV=1	29	8	52	8	42.278	151.55	8	37	2.28375e+06	3.81883e+06	4.52173e+06	3.63274e+06	3.54788e+06	6.43574e+06	5.25655e+06	6.90072e+06	1.46769e+07	9.86944e+06	7.15697e+06	6	7	7	7	6	8	7	7	7	7	7	6	7	7	7	6	8	7	7	7	7	7
Q8K4Q8	140792	Colec12	FALSE	Collectin-12 OS=Mus musculus OX=10090 GN=Colec12 PE=1 SV=1	15	11	52	11	37.847	134.9	11	81.3	4.49837e+06	4.07463e+06	4.92885e+06	5.71828e+06	5.87996e+06	5.62771e+06	3.90517e+06	3.94158e+06	8.83265e+06	4.06404e+06	5.33505e+06	11	10	10	9	9	10	10	10	9	9	9	11	10	10	9	9	10	10	10	9	9	9
Q8C8T8	69499	Tsr2	FALSE	Pre-rRNA-processing protein TSR2 homolog OS=Mus musculus OX=10090 GN=Tsr2 PE=1 SV=1	36	5	52	5	24.116	146.87	5	20.9	6.36101e+06	8.83358e+06	9.10664e+06	9.60484e+06	7.4159e+06	8.8199e+06	9.72312e+06	7.99618e+06	1.96559e+07	1.17917e+07	1.72348e+07	5	5	5	5	5	4	5	5	5	4	5	5	5	5	5	5	4	5	5	5	4	5
Q9CQV7	67713	Dnajc19	TRUE	Mitochondrial import inner membrane translocase subunit TIM14 OS=Mus musculus OX=10090 GN=Dnajc19 PE=1 SV=3	56	6	52	6	18.478	137.98	6	12.4	2.47791e+06	2.89236e+06	3.34372e+06	2.75832e+06	4.13566e+06	5257592	7.47345e+06	9.65656e+06	9.84869e+06	1.00458e+07	6.77598e+06	6	6	6	6	6	6	6	6	6	6	6	6	6	6	6	6	6	6	6	6	6	6
P49817	12389	Cav1	FALSE	Caveolin-1 OS=Mus musculus OX=10090 GN=Cav1 PE=1 SV=1	46	7	52	7	30.986	134.2	7	20.5	7.32351e+06	3.52891e+06	5.00042e+06	1.33131e+07	1.526e+07	2.06299e+07	4.32889e+06	5.8301e+06	5.16958e+06	2.31768e+06	1.4522e+07	7	7	7	7	7	7	7	7	7	6	7	7	7	7	7	7	7	7	7	7	6	7
Q64726	12007	Azgp1	FALSE	Zinc-alpha-2-glycoprotein OS=Mus musculus OX=10090 GN=Azgp1 PE=1 SV=2	29	8	52	8	30.403	143.08	8	35.3	1.2615e+06	2.62643e+06	3.30114e+06	2.76599e+06	939597	5.7694e+06	1.26074e+06	2.8678e+06	2.23752e+06	2.72952e+06	2.76502e+06	6	6	7	7	5	7	5	7	5	8	7	6	6	7	7	5	7	5	7	5	8	7
Q62425	17992	Ndufa4	TRUE	Cytochrome c oxidase subunit NDUFA4 OS=Mus musculus OX=10090 GN=Ndufa4 PE=1 SV=2	48	6	52	6	19.036	126.36	6	9.3	4.66498e+07	5.2801e+07	8.39502e+07	5.15951e+07	9.27177e+07	3.26509e+07	1.83587e+07	1.772e+07	4.29635e+07	4.18242e+07	6.41114e+07	5	5	6	5	6	5	5	4	6	6	6	5	5	6	5	6	5	5	4	6	6	6
P50136	12039	Bckdha	TRUE	2-oxoisovalerate dehydrogenase subunit alpha, mitochondrial OS=Mus musculus OX=10090 GN=Bckdha PE=1 SV=1	27	10	52	10	49.391	156.71	10	50.3	1.7579e+06	2002637	2.36663e+06	2.28943e+06	3.3164e+06	3.36236e+06	3.95901e+06	6.97858e+06	8.14063e+06	8.641e+06	6.36172e+06	6	5	7	5	8	7	8	9	9	9	9	6	5	7	5	8	7	8	9	9	9	9
Q9Z0M6	26364	Adgre5	FALSE	Adhesion G protein-coupled receptor E5 OS=Mus musculus OX=10090 GN=Adgre5 PE=1 SV=2	11	7	52	7	32.116	148.07	7	90.4	4.12776e+06	7.09221e+06	8.95326e+06	1.03549e+07	6.09368e+06	1.07716e+07	6.59862e+06	9.73347e+06	2.11997e+07	1.64863e+07	1.38568e+07	7	7	7	7	7	7	7	7	7	7	7	7	7	7	7	7	7	7	7	7	7	7
Q6NXN1	213491	Szrd1	FALSE	SUZ domain-containing protein 1 OS=Mus musculus OX=10090 GN=Szrd1 PE=1 SV=1	64	8	52	8	26.258	146.78	8	17	1.31716e+07	9.0712e+06	7.68847e+06	1.01214e+07	1.54214e+07	8.11737e+06	1.02449e+07	9.56103e+06	1.74322e+07	1.1137e+07	1.47528e+07	8	7	7	7	7	6	7	7	7	7	8	8	7	7	7	7	6	7	7	7	7	8
Q9CPR4	319195	Rpl17	FALSE	60S ribosomal protein L17 OS=Mus musculus OX=10090 GN=Rpl17 PE=1 SV=3	37	7	51	7	31.657	152.11	7	21.4	2.69922e+07	3.06385e+07	3.0104e+07	2.60575e+07	3.5975e+07	2.35297e+07	1.27257e+07	2.4689e+07	2.53744e+07	3.91088e+07	2.8688e+07	7	7	7	7	7	7	7	7	7	7	7	7	7	7	7	7	7	7	7	7	7	7
Q9R0L6	18536	Pcm1	FALSE	Pericentriolar material 1 protein OS=Mus musculus OX=10090 GN=Pcm1 PE=1 SV=2	11	16	51	16	56.034	127.55	16	228.7	999684	1.09909e+06	1.66772e+06	1.05656e+06	1.1124e+06	2.59819e+06	2.89988e+06	2.30845e+06	6.02379e+06	4.98947e+06	3.7585e+06	10	8	10	8	7	11	13	12	13	14	14	10	8	10	8	7	11	13	12	13	14	14
P00920	12349	Car2	FALSE	Carbonic anhydrase 2 OS=Mus musculus OX=10090 GN=Ca2 PE=1 SV=4	52	8	51	8	41.444	163.34	8	29	2.0543e+06	5.3032e+06	5.64686e+06	6.63742e+06	2.06916e+06	1.19675e+07	1.89344e+06	4.54036e+06	6.92409e+06	1.83547e+07	5.26282e+06	5	8	8	8	5	8	4	8	8	8	8	5	8	8	8	5	8	4	8	8	8	8
Q9CPX6	67841	Atg3	FALSE	Ubiquitin-like-conjugating enzyme ATG3 OS=Mus musculus OX=10090 GN=Atg3 PE=1 SV=1	32	9	51	9	32.359	131.31	9	35.8	2.58712e+06	9.88672e+06	9.93417e+06	4.9974e+06	3.22411e+06	9.96727e+06	2.71574e+06	5.73837e+06	5.89646e+06	1.2196e+07	7.89597e+06	4	9	9	7	5	8	6	7	7	9	8	4	9	9	7	5	8	6	7	7	9	8
Q9QWK4	11801	Cd5l	FALSE	CD5 antigen-like OS=Mus musculus OX=10090 GN=Cd5l PE=1 SV=3	20	7	51	7	26.07	121.16	7	38.8	3.07823e+06	5.62945e+06	4.9972e+06	9.62165e+06	1.79461e+06	5.85076e+06	3.74324e+06	3.55371e+06	1.24404e+07	5.25125e+06	5.94418e+06	7	7	7	7	6	7	6	7	7	7	7	7	7	7	7	6	7	6	7	7	7	7
P59017	94044	Bcl2l13	TRUE	Bcl-2-like protein 13 OS=Mus musculus OX=10090 GN=Bcl2l13 PE=1 SV=2	28	7	51	7	26.648	142.84	7	46.7	1.08146e+07	6.42607e+06	7.25466e+06	7.21869e+06	1.11134e+07	1.12383e+07	1.3266e+07	1.21379e+07	9.52125e+06	12045474	1.40532e+07	5	5	5	4	5	5	4	5	5	5	6	5	5	5	4	5	5	4	5	5	5	6
P09542	17897	Myl3	FALSE	Myosin light chain 3 OS=Mus musculus OX=10090 GN=Myl3 PE=1 SV=4	78	16	51	12	88.907	147.95	16	22.4	340881		177304	327953	197715	2.17478e+08			137505		290975	7	2	5	3	3	16	2	2	4	2	5	7	2	5	3	3	16	2	2	4	2	5
Q921I1	22041	Trf	FALSE	Serotransferrin OS=Mus musculus OX=10090 GN=Tf PE=1 SV=1	17	11	51	11	45.673	116.95	11	76.7	4.05788e+06	4.04956e+06	3.29972e+06	4.98892e+06	4.2344e+06	4.65853e+06	1.64734e+06	2.27594e+06	2.6533e+06	5.99133e+06	4.13497e+06	11	10	10	10	8	10	8	7	9	10	9	11	10	10	10	8	10	8	7	9	10	9
P46471	19181	Psmc2	FALSE	26S proteasome regulatory subunit 7 OS=Mus musculus OX=10090 GN=Psmc2 PE=1 SV=5	15	5	51	5	20.091	124.12	5	48.6	2.76017e+06	2.49972e+06	2.79471e+06	3.3055e+06	3.64718e+06	2.04423e+06	1.97998e+06	2.35604e+06	4.51783e+06	2.54298e+06	4.11712e+06	5	5	5	5	5	5	5	5	5	5	5	5	5	5	5	5	5	5	5	5	5	5
Q8K2K6	15463	Agfg1	FALSE	Arf-GAP domain and FG repeat-containing protein 1 OS=Mus musculus OX=10090 GN=Agfg1 PE=1 SV=2	20	8	51	8	39.273	159.09	8	58	4.86309e+06	5.08969e+06	5.07449e+06	5.26468e+06	6.02749e+06	5.82994e+06	7.94773e+06	7.8922e+06	1.46217e+07	1.28789e+07	1.01603e+07	6	7	6	6	7	7	6	7	8	7	7	6	7	6	6	7	7	6	7	8	7	7
Q9QXS6	56320	Dbn1	FALSE	Drebrin OS=Mus musculus OX=10090 GN=Dbn1 PE=1 SV=4	22	10	51	10	43.683	151.87	10	77.2	1.48654e+06	2.45642e+06	1.8448e+06	4.10901e+06	2.2512e+06	7.90512e+06	3.99699e+06	3.98307e+06	8.22853e+06	4.94031e+06	6.17423e+06	8	8	6	9	9	10	9	9	9	9	9	8	8	6	9	9	10	9	9	9	9	9
Q8VCH8	67812	Ubxn4	FALSE	UBX domain-containing protein 4 OS=Mus musculus OX=10090 GN=Ubxn4 PE=1 SV=1	18	8	51	8	27.271	146.7	8	56.4	6.20706e+06	5.77067e+06	5.30692e+06	4.59463e+06	7.76678e+06	5.1015e+06	5.40241e+06	6.14514e+06	6.87785e+06	6.28052e+06	6.52129e+06	8	7	7	7	8	7	8	7	8	8	7	8	7	7	7	8	7	8	7	8	8	7
P47963	270106	Rpl13	FALSE	60S ribosomal protein L13 OS=Mus musculus OX=10090 GN=Rpl13 PE=1 SV=3	30	7	51	7	27.095	128.91	7	24.3	1.26799e+06	4.40637e+06	4.90112e+06	5.01362e+06	2.88888e+06	2.84775e+06	1.4632e+06	3.68682e+06	5.1574e+06	6.53239e+06	4.43861e+06	6	7	7	7	6	7	7	7	7	7	7	6	7	7	7	6	7	7	7	7	7	7
Q8K0V4	232791	Cnot3	FALSE	CCR4-NOT transcription complex subunit 3 OS=Mus musculus OX=10090 GN=Cnot3 PE=1 SV=1	10	9	51	9	32.06	129.63	9	81.9	4.03529e+06	3.62309e+06	3.24605e+06	4.2928e+06	5.34023e+06	2.74816e+06	3.07238e+06	4.01598e+06	5.28158e+06	3.46727e+06	4.90557e+06	7	7	7	7	8	6	8	8	8	7	7	7	7	7	7	8	6	8	8	8	7	7
Q6PH08	238988	Erc2	FALSE	ERC protein 2 OS=Mus musculus OX=10090 GN=Erc2 PE=1 SV=2	8	9	51	1	26.99	112.18	9	110.6	337188	394814	329525	351655	218947	225919	218625	264144	335009	282492	285122	8	8	8	7	8	6	9	8	8	8	8	8	8	8	7	8	6	9	8	8	8	8
Q99KG3	236732	Rbm10	FALSE	RNA-binding protein 10 OS=Mus musculus OX=10090 GN=Rbm10 PE=1 SV=1	15	11	50	11	43.453	139.74	11	103.4	3.54571e+06	4.51195e+06	4.65136e+06	3967420	3.92076e+06	2.81412e+06	2.19306e+06	3.13781e+06	3.34973e+06	3.56184e+06	4.21736e+06	10	9	9	9	9	8	8	8	9	11	8	10	9	9	9	9	8	8	8	9	11	8
Q9CZ13	22273	Uqcrc1	TRUE	Cytochrome b-c1 complex subunit 1, mitochondrial OS=Mus musculus OX=10090 GN=Uqcrc1 PE=1 SV=2	30	11	50	11	51.96	164.41	11	52.8	1.32788e+06	2.81917e+06	2.35837e+06	2.02853e+06	2.63605e+06	9.78862e+06	7.59898e+06	1.2455e+07	1.29261e+07	1.49312e+07	9.60904e+06	6	6	6	6	6	10	9	10	9	11	9	6	6	6	6	6	10	9	10	9	11	9
Q8BG95	329251	Ppp1r12b	FALSE	Protein phosphatase 1 regulatory subunit 12B OS=Mus musculus OX=10090 GN=Ppp1r12b PE=1 SV=2	8	7	50	4	30.513	148.85	7	109	1.23911e+06	1.35313e+06	1.08454e+06	4.43328e+06	2.01221e+06	3.53587e+06	1.91711e+06	1.55369e+06	3.24358e+06	1.45391e+06	3.52338e+06	5	5	7	7	6	7	6	6	7	6	7	5	5	7	7	6	7	6	6	7	6	7
O88685	19182	Psmc3	FALSE	26S proteasome regulatory subunit 6A OS=Mus musculus OX=10090 GN=Psmc3 PE=1 SV=2	40	12	50	12	53.07	141.3	12	49.5	815454	5.47382e+06	6.28942e+06	2.52709e+06	799502	8.88534e+06	953677	3.00512e+06	2.46103e+06	8.34783e+06	2.79914e+06	3	10	10	9	2	12	4	9	6	11	6	3	10	10	9	2	12	4	9	6	11	6
Q9R020	53861	Zranb2	FALSE	Zinc finger Ran-binding domain-containing protein 2 OS=Mus musculus OX=10090 GN=Zranb2 PE=1 SV=2	27	7	50	7	27.634	122.37	7	37.3	6.32219e+06	6.70732e+06	6.96529e+06	7.05112e+06	9.25377e+06	7.29343e+06	4.06879e+06	5.21109e+06	1.11662e+07	8.37149e+06	1.07105e+07	7	6	6	6	7	7	5	7	6	6	7	7	6	6	6	7	7	5	7	6	6	7
Q9JKK1	58244	Stx6	FALSE	Syntaxin-6 OS=Mus musculus OX=10090 GN=Stx6 PE=1 SV=1	37	7	50	7	34.728	149.45	7	29	1.29094e+06	1.98204e+06	2.91296e+06	2489309	2.0025e+06	2.34816e+06	1.79083e+06	2.23133e+06	2.40988e+06	2.92031e+06	2.43478e+06	5	6	7	6	7	5	5	6	5	7	6	5	6	7	6	7	5	5	6	5	7	6
Q6ZWY8	19240	Tmsb10	FALSE	Thymosin beta-10 OS=Mus musculus OX=10090 GN=Tmsb10 PE=1 SV=3	66	5	50	4	20.892	116.93	5	5	3.71462e+06	4.28421e+06	4.60441e+06	7.21389e+06	7.45875e+06	8.1155e+06	5.84087e+06	5.99832e+06	3.63001e+07	7.09244e+06	6.16758e+06	3	3	3	3	3	3	3	3	5	3	3	3	3	3	3	3	3	3	3	5	3	3
Q8R2Q8	69550	Bst2	FALSE	Bone marrow stromal antigen 2 OS=Mus musculus OX=10090 GN=Bst2 PE=1 SV=1	28	6	50	6	21.665	136.73	6	19.1	2.05143e+07	1.40632e+07	1.84486e+07	1.49437e+07	2.3822e+07	1.98691e+07	16936200	1.73577e+07	2.03789e+07	1.6446e+07	3.73921e+07	6	5	6	5	6	6	6	6	5	5	6	6	5	6	5	6	6	6	6	5	5	6
Q9D154	66222	Serpinb1a	FALSE	Leukocyte elastase inhibitor A OS=Mus musculus OX=10090 GN=Serpinb1a PE=1 SV=1	35	11	50	11	46.203	137.89	11	42.5	2.83007e+06	5.2981e+06	1.28562e+07	1.07283e+07	4.64661e+06	2.43353e+06	544596	549609	1.81321e+06	3.03186e+06	1.29083e+07	10	11	11	11	11	8	6	5	8	9	11	10	11	11	11	11	8	6	5	8	9	11
P14094	11931	Atp1b1	FALSE	Sodium/potassium-transporting ATPase subunit beta-1 OS=Mus musculus OX=10090 GN=Atp1b1 PE=1 SV=1	33	10	50	10	34.708	108.56	10	35.2	2.3923e+06	1.11115e+07	1.17711e+07	1.03049e+07	3.2357e+06	1.62142e+07	4.37714e+06	1.20031e+07	1.71332e+07	1.34999e+07	1.08249e+07	7	7	8	10	7	9	8	8	8	8	8	7	7	8	10	7	9	8	8	8	8	8
P19221	14061	F2	FALSE	Prothrombin OS=Mus musculus OX=10090 GN=F2 PE=1 SV=1	23	14	50	14	51.991	121.49	14	70.2	1.25604e+06	8.00977e+06	6.69036e+06	6.38764e+06	1.97785e+06	1.20759e+07	1.98452e+06	7.26753e+06	3.63866e+06	6.76235e+06	5.64661e+06	6	13	12	13	7	14	8	13	9	12	13	6	13	12	13	7	14	8	13	9	12	13
P51174	11363	Acadl	TRUE	Long-chain specific acyl-CoA dehydrogenase, mitochondrial OS=Mus musculus OX=10090 GN=Acadl PE=1 SV=2	20	9	50	9	41.955	131.42	9	47.9	8.81723e+06	1.28508e+07	1.69207e+07	2.17765e+07	1.86169e+07	2.26999e+07	2.79498e+07	3.45504e+07	7.32732e+07	5.93677e+07	4.22719e+07	6	8	9	8	7	7	6	8	8	9	7	6	8	9	8	7	7	6	8	8	9	7
Q3V3R4	109700	Itga1	FALSE	Integrin alpha-1 OS=Mus musculus OX=10090 GN=Itga1 PE=1 SV=2	9	10	50	10	29.074	118.43	10	130.7	1.21499e+06	2.2676e+06	2.75238e+06	3.74056e+06	1.50021e+06	4.11792e+06	2.2261e+06	2.84311e+06	5.0163e+06	3.28422e+06	4.70983e+06	6	9	10	9	7	9	8	9	9	8	9	6	9	10	9	7	9	8	9	9	8	9
Q78JT3	107766	Haao	FALSE	3-hydroxyanthranilate 3,4-dioxygenase OS=Mus musculus OX=10090 GN=Haao PE=1 SV=1	53	11	50	11	41.575	136.22	11	32.8	1.854e+06	7.88924e+06	9.89354e+06	4.72101e+06	3.09874e+06	3.98062e+06	1.02656e+06	1.95985e+06	962217	2.30261e+06	2.88799e+06	7	11	11	10	7	8	5	8	4	7	7	7	11	11	10	7	8	5	8	4	7	7
Q8K1I7	215280	Wipf1	FALSE	WAS/WASL-interacting protein family member 1 OS=Mus musculus OX=10090 GN=Wipf1 PE=1 SV=1	20	5	50	5	23.283	145.8	5	50.1	3.73839e+06	3.95124e+06	3.85442e+06	5.21773e+06	5.29224e+06	3.48949e+06	4.89888e+06	5.7193e+06	9.37904e+06	5.40035e+06	8.33644e+06	5	5	5	5	5	5	5	5	5	5	5	5	5	5	5	5	5	5	5	5	5	5
P14206	16785	Rpsa	FALSE	40S ribosomal protein SA OS=Mus musculus OX=10090 GN=Rpsa PE=1 SV=4	52	10	49	10	50.72	154.4	10	32.8	809342	7.35484e+06	1.03385e+07	5.40721e+06	1.0334e+06	1.28561e+07	1.72839e+06	5.53849e+06	5.20977e+06	1.3588e+07	4.49189e+06	5	10	10	9	5	10	6	8	5	10	5	5	10	10	9	5	10	6	8	5	10	5
Q00560	16195	Il6st	FALSE	Interleukin-6 receptor subunit beta OS=Mus musculus OX=10090 GN=Il6st PE=1 SV=2	11	6	49	6	24.177	123.05	6	102.4	3.20369e+06	2.75153e+06	2.25786e+06	2.56399e+06	3.24633e+06	2.25062e+06	2.60302e+06	2.82954e+06	4912216	3.1277e+06	4.34376e+06	6	6	6	6	6	5	6	6	6	6	6	6	6	6	6	6	5	6	6	6	6	6
Q8BJ64	218865	Chdh	TRUE	Choline dehydrogenase, mitochondrial OS=Mus musculus OX=10090 GN=Chdh PE=1 SV=1	17	8	49	8	48.082	144.74	8	66.4	5.5079e+06	3.55187e+06	4.3902e+06	4.88796e+06	8.0432e+06	6.21557e+06	1.09259e+07	1.2198e+07	1.75679e+07	1.67018e+07	1.1869e+07	8	6	7	7	7	6	8	8	8	8	8	8	6	7	7	7	6	8	8	8	8	8
Q9D198	68592	Syf2	FALSE	Pre-mRNA-splicing factor SYF2 OS=Mus musculus OX=10090 GN=Syf2 PE=2 SV=1	50	7	49	7	28.605	149.15	7	28.7	3.47713e+06	2.55933e+06	2.06501e+06	2.98439e+06	4.92216e+06	1.43818e+06	2.58868e+06	3.11708e+06	5.42861e+06	2907244	5.33611e+06	6	7	6	7	7	5	7	7	7	6	7	6	7	6	7	7	5	7	7	7	6	7
Q9WU28	56612	Pfdn5	FALSE	Prefoldin subunit 5 OS=Mus musculus OX=10090 GN=Pfdn5 PE=1 SV=1	66	7	49	7	39.02	141.4	7	17.3	494669	3.29798e+06	3.3749e+06	2.53355e+06	1.16746e+06	5.33485e+06	1.44401e+06	3.11748e+06	6.38812e+06	6.4313e+06	5.68234e+06	4	7	6	6	6	6	4	7	7	7	7	4	7	6	6	6	6	4	7	7	7	7
P56528	12494	Cd38	FALSE	ADP-ribosyl cyclase/cyclic ADP-ribose hydrolase 1 OS=Mus musculus OX=10090 GN=Cd38 PE=1 SV=2	34	7	49	7	42.248	135.65	7	34.4	657203	6.62697e+06	7.29926e+06	7325299	2.10884e+06	6.74476e+06	2.66698e+06	5.92626e+06	6.51539e+06	5.25066e+06	5.58044e+06	4	7	7	7	5	7	6	6	6	7	6	4	7	7	7	5	7	6	6	6	7	6
Q925P2	26367	Ceacam2	FALSE	Carcinoembryonic antigen-related cell adhesion molecule 2 OS=Mus musculus OX=10090 GN=Ceacam2 PE=1 SV=3	16	6	49	1	27.151	132.34	6	57.2	212476	194380	312467	182584	584751		78925.2	292774	158178	102931	272660	6	6	6	6	6	4	6	6	6	5	6	6	6	6	6	6	4	6	6	6	5	6
Q61712	13418	Dnajc1	FALSE	DnaJ homolog subfamily C member 1 OS=Mus musculus OX=10090 GN=Dnajc1 PE=1 SV=1	16	6	49	6	26.274	142.24	6	63.8	12372779	9.32351e+06	6.48851e+06	7.85731e+06	1.02373e+07	6.58863e+06	7.88374e+06	8.22747e+06	9.63905e+06	7.60558e+06	1.19775e+07	6	6	5	5	5	5	5	5	5	5	5	6	6	5	5	5	5	5	5	5	5	5
Q9WVB0	19663	Rbpms	FALSE	RNA-binding protein with multiple splicing OS=Mus musculus OX=10090 GN=Rbpms PE=1 SV=2	47	8	49	6	32.527	115.92	8	21.8	3.42593e+06	3.34047e+06	3.21004e+06	3.3493e+06	5.15433e+06	1.09758e+07	8.07512e+06	9.52606e+06	2.49806e+07	2.02077e+07	8.83053e+06	8	7	7	7	8	8	8	8	8	8	8	8	7	7	7	8	8	8	8	8	8	8
Q9Z172	20610	Sumo3	FALSE	Small ubiquitin-related modifier 3 OS=Mus musculus OX=10090 GN=Sumo3 PE=1 SV=1	23	3	49	2	12.785	140.46	3	12.4	3.91384e+07	3.31753e+07	2.77284e+07	3.30089e+07	5.23027e+07	2.43397e+07	3.37661e+07	3.32067e+07	6.7166e+07	3.26348e+07	5.59223e+07	3	3	3	3	3	3	3	3	3	3	3	3	3	3	3	3	3	3	3	3	3	3
Q9CQ75	17991	Ndufa2	TRUE	NADH dehydrogenase [ubiquinone] 1 alpha subcomplex subunit 2 OS=Mus musculus OX=10090 GN=Ndufa2 PE=1 SV=3	49	6	49	6	21.748	105.34	6	10.9	3.02138e+06	8.54936e+06	9.00027e+06	6.15071e+06	5.47104e+06	24687324	1.11544e+07	2.4663e+07	2.20122e+07	2.62288e+07	1.42814e+07	6	6	6	6	6	6	6	6	6	6	6	6	6	6	6	6	6	6	6	6	6	6
Q9CPW4	67771	Arpc5	FALSE	Actin-related protein 2/3 complex subunit 5 OS=Mus musculus OX=10090 GN=Arpc5 PE=1 SV=3	52	4	49	4	22.193	172.79	4	16.3	4.05375e+06	1.85872e+07	1.79542e+07	1.56392e+07	8.20234e+06	2.11533e+07	8.33435e+06	1.69459e+07	2.12922e+07	1.9524e+07	1.8153e+07	4	4	4	4	4	4	4	4	4	4	3	4	4	4	4	4	4	4	4	4	4	3
Q8VI36	19303	Pxn	FALSE	Paxillin OS=Mus musculus OX=10090 GN=Pxn PE=1 SV=1	25	7	49	7	43.766	149.6	7	64.4	3.29256e+06	5.06649e+06	4.2641e+06	4.00299e+06	3.64799e+06	7.3591e+06	3.78965e+06	4.73796e+06	4.47182e+06	6.72062e+06	6.84468e+06	5	6	6	6	7	4	5	5	6	6	6	5	6	6	6	7	4	5	5	6	6	6
Q9DAK9	75454	Phpt1	FALSE	14 kDa phosphohistidine phosphatase OS=Mus musculus OX=10090 GN=Phpt1 PE=1 SV=1	62	6	49	6	21.188	95.56	6	14	1.04475e+06	1.55551e+06	2.44151e+06	2.08546e+06	1.46519e+06	3.08906e+06	2.2885e+06	2.00905e+06	4.43954e+06	3.94871e+06	3.61583e+06	6	5	6	5	5	5	6	5	6	6	6	6	5	6	5	5	5	6	5	6	6	6
Q9EQ32	83490	Pik3ap1	FALSE	Phosphoinositide 3-kinase adapter protein 1 OS=Mus musculus OX=10090 GN=Pik3ap1 PE=1 SV=1	13	7	49	7	34.862	140.9	7	90.9	1.74756e+06	2.54778e+06	1.10638e+06	1.46734e+06	1.73793e+06	2.16589e+06	2.1494e+06	2.74382e+06	1.80561e+06	3.36463e+06	2.83234e+06	6	6	5	6	5	6	6	7	5	6	7	6	6	5	6	5	6	6	7	5	6	7
Q99KR7	105675	Ppif	TRUE	Peptidyl-prolyl cis-trans isomerase F, mitochondrial OS=Mus musculus OX=10090 GN=Ppif PE=1 SV=1	27	5	49	4	15.505	130.49	5	21.7	1.86663e+06	3.40756e+06	3.13686e+06	2.64584e+06	2.66956e+06	1.28741e+07	5.60451e+06	11188284	1.56322e+07	1.78236e+07	6.83737e+06	5	5	4	4	5	5	5	5	5	5	5	5	5	4	4	5	5	5	5	5	5	5
P42703	16880	Lifr	FALSE	Leukemia inhibitory factor receptor OS=Mus musculus OX=10090 GN=Lifr PE=1 SV=1	20	15	49	15	56.001	143.89	15	122.5	2.4084e+06	3.73502e+06	3.74839e+06	6.88545e+06	1.66094e+06	946264	1.1585e+06	818242	2.04944e+06	1.62652e+06	2.60782e+06	9	12	13	15	9	5	7	5	8	9	7	9	12	13	15	9	5	7	5	8	9	7
Q8VE88	67726	Fam114a2	FALSE	Protein FAM114A2 OS=Mus musculus OX=10090 GN=Fam114a2 PE=1 SV=2	36	10	48	10	40.41	137.85	10	54	1.97772e+06	4.61458e+06	3.68834e+06	3.99506e+06	2.10959e+06	4.67081e+06	1.90732e+06	3.72518e+06	4.64422e+06	5.45035e+06	4.76108e+06	6	10	10	9	5	10	6	10	8	10	9	6	10	10	9	5	10	6	10	8	10	9
Q9CYA6	70650	Zcchc8	FALSE	Zinc finger CCHC domain-containing protein 8 OS=Mus musculus OX=10090 GN=Zcchc8 PE=1 SV=3	20	9	48	9	32.657	133.36	9	78	1.55411e+06	3.92501e+06	4.15378e+06	3.48994e+06	2.3628e+06	4.02721e+06	2.81637e+06	3.80143e+06	6.52426e+06	4.07246e+06	5.10843e+06	4	7	8	8	6	6	7	7	7	7	7	4	7	8	8	6	6	7	7	7	7	7
Q8BU14	69276	Sec62	FALSE	Translocation protein SEC62 OS=Mus musculus OX=10090 GN=Sec62 PE=1 SV=1	16	8	48	8	30.298	108.49	8	45.6	3.12305e+06	6.02474e+06	5.04279e+06	4.91337e+06	5.12745e+06	5.89085e+06	3.697e+06	5.44448e+06	6.2411e+06	4.95647e+06	6.52426e+06	7	6	6	7	7	8	6	7	7	7	7	7	6	6	7	7	8	6	7	7	7	7
Q9D1L0	14004	Chchd2	TRUE	Coiled-coil-helix-coiled-coil-helix domain-containing protein 2 OS=Mus musculus OX=10090 GN=Chchd2 PE=2 SV=1	31	4	48	4	28.133	195.59	4	15.7	2.88525e+07	2.78618e+07	2.5412e+07	3.63026e+07	3.8e+07	4.16965e+07	7.11774e+07	91080844	8.13782e+07	9.48084e+07	8.38583e+07	4	4	4	4	4	4	4	4	4	4	4	4	4	4	4	4	4	4	4	4	4	4
P29595	18002	Nedd8	FALSE	NEDD8 OS=Mus musculus OX=10090 GN=Nedd8 PE=1 SV=2	46	4	48	4	17.459	136.6	4	9	8.64716e+06	8.0213e+06	9.69385e+06	1.077e+07	1.22793e+07	1.42006e+07	1.0964e+07	1.1997e+07	1.78115e+07	12334688	9.21414e+06	4	4	4	4	4	4	4	4	4	4	3	4	4	4	4	4	4	4	4	4	4	3
Q8BGA8	272428	Acsm5	TRUE	Acyl-coenzyme A synthetase ACSM5, mitochondrial OS=Mus musculus OX=10090 GN=Acsm5 PE=1 SV=1	15	6	48	6	24.697	151.41	6	64.3	2.20213e+06	1.55192e+06	1.97565e+06	1.63016e+06	2.40708e+06	3.64379e+06	3.47106e+06	6.37129e+06	6.14368e+06	5.05314e+06	4.16216e+06	6	6	6	5	6	6	6	6	6	6	6	6	6	6	5	6	6	6	6	6	6	6
O54962	23825	Banf1	FALSE	Barrier-to-autointegration factor OS=Mus musculus OX=10090 GN=Banf1 PE=1 SV=1	51	4	48	4	23.641	154.61	4	10.1	3.29052e+06	8.36633e+06	8883526	7.68618e+06	6.95005e+06	1.96125e+07	6.90128e+06	1.15986e+07	1.99055e+07	24331904	1.13004e+07	3	4	4	4	4	4	4	4	4	4	4	3	4	4	4	4	4	4	4	4	4	4
P11276	14268	Fn1	FALSE	Fibronectin OS=Mus musculus OX=10090 GN=Fn1 PE=1 SV=4	6	9	47	9	38.578	138.42	9	272.4	3.10204e+06	3.6569e+06	3.61285e+06	5.38806e+06	3.65409e+06	4.22951e+06	1.61334e+06	1.4938e+06	4.61453e+06	3.64751e+06	5.386e+06	7	8	7	9	8	8	5	6	7	7	8	7	8	7	9	8	8	5	6	7	7	8
Q9CQY2	67148	Ramac	FALSE	RNA guanine-N7 methyltransferase activating subunit OS=Mus musculus OX=10090 GN=Ramac PE=3 SV=1	51	6	47	6	21.204	120.39	6	14.5	5.07492e+06	3.18251e+06	3.0464e+06	4.5967e+06	6.29999e+06	2.25376e+06	4.24976e+06	4.20861e+06	1.07863e+07	5.09672e+06	5.71803e+06	6	5	6	6	5	5	5	6	6	6	6	6	5	6	6	5	5	5	6	6	6	6
P27005	20201	S100a8	FALSE	Protein S100-A8 OS=Mus musculus OX=10090 GN=S100a8 PE=1 SV=3	94	5	47	5	47.959	165.79	5	10.3	2.14795e+07	1.16882e+07	8.85578e+06	1.05234e+07	1.45927e+07	4.48884e+07	2.72663e+07	2.94178e+07	6.2366e+07	7.7496e+07	3.53699e+07	4	4	4	4	4	5	4	5	5	5	5	4	4	4	4	4	5	4	5	5	5	5
P01592	16069	Jchain	FALSE	Immunoglobulin J chain OS=Mus musculus OX=10090 GN=Jchain PE=1 SV=4	27	4	47	4	17.667	114.66	4	18	1.3166e+07	1.3092e+07	8.1823e+06	1.98356e+07	1.19573e+07	1.69334e+07	1.04604e+07	1.3908e+07	2.84506e+07	1.17975e+07	1.10052e+07	4	4	4	4	4	4	4	4	4	4	4	4	4	4	4	4	4	4	4	4	4	4
Q9R0I7	56531	Ylpm1	FALSE	YLP motif-containing protein 1 OS=Mus musculus OX=10090 GN=Ylpm1 PE=2 SV=2	13	10	47	10	34.657	136.65	10	155	589840	6.58191e+06	5.78766e+06	7.0379e+06	6.49089e+06	844819	730144	6.09527e+06	1.00364e+07	7.0566e+06	1.27325e+07	5	8	8	9	5	6	5	8	8	9	9	5	8	8	9	5	6	5	8	8	9	9
Q9CWE0	76824	Mtfr1l	TRUE	Mitochondrial fission regulator 1-like OS=Mus musculus OX=10090 GN=Mtfr1l PE=1 SV=1	48	12	47	12	54.217	137.88	12	31.7	3.32431e+06	4.60548e+06	4.83608e+06	4.11486e+06	3.34498e+06	1.3253e+07	1.04142e+07	1.55141e+07	1.52463e+07	2.09095e+07	9.8191e+06	6	7	8	8	5	10	9	11	10	11	9	6	7	8	8	5	10	9	11	10	11	9
P58064	121022	Mrps6	TRUE	28S ribosomal protein S6, mitochondrial OS=Mus musculus OX=10090 GN=Mrps6 PE=1 SV=3	69	8	47	8	23.71	106.71	8	14.3	1.01041e+06	3.34013e+06	3.55686e+06	2.16918e+06	2.67654e+06	8.06084e+06	4.52428e+06	9.92163e+06	1.07822e+07	1.25785e+07	5.43774e+06	5	7	7	7	7	8	7	8	8	8	8	5	7	7	7	7	8	7	8	8	8	8
P70663	13602	Sparcl1	FALSE	SPARC-like protein 1 OS=Mus musculus OX=10090 GN=Sparcl1 PE=1 SV=3	22	10	47	10	40.898	128.03	10	72.2	187202	734818	676611	1.04879e+06	302522	1.61599e+06	833676	820828	2.45178e+06	1.4729e+06	1.2492e+06	4	6	6	9	3	8	6	6	9	7	7	4	6	6	9	3	8	6	6	9	7	7
Q69ZC8	67467	Gpalpp1	FALSE	GPALPP motifs-containing protein 1 OS=Mus musculus OX=10090 GN=Gpalpp1 PE=1 SV=2	20	7	47	7	24.542	123.97	7	38.9	3.16556e+06	3.59971e+06	3.65817e+06	3.8248e+06	4.93246e+06	3.93399e+06	3.8287e+06	4.25184e+06	8.05438e+06	4.95471e+06	6.02257e+06	6	5	5	5	5	6	5	5	6	5	5	6	5	5	5	5	6	5	5	6	5	5
Q9WU78	18571	Pdcd6ip	FALSE	Programmed cell death 6-interacting protein OS=Mus musculus OX=10090 GN=Pdcd6ip PE=1 SV=3	18	11	47	11	33.93	126.77	11	96	1.76558e+06	2.92637e+06	3.89573e+06	2.56912e+06	2.06975e+06	2.53033e+06	1.7599e+06	2.52575e+06	4.21204e+06	3.69473e+06	3.91914e+06	9	9	10	9	9	9	8	9	9	10	10	9	9	10	9	9	9	8	9	9	10	10
Q9BCZ4	109815	Selenos	FALSE	Selenoprotein S OS=Mus musculus OX=10090 GN=Selenos PE=1 SV=3	57	7	47	7	36.501	152.94	7	21.5	6.78779e+06	4.75536e+06	3.3514e+06	4.13842e+06	7.74925e+06	3.568e+06	4.99247e+06	6.02176e+06	1.09232e+07	3.82021e+06	5.94435e+06	7	7	5	7	7	6	5	6	7	6	7	7	7	5	7	7	6	5	6	7	6	7
Q8BKZ9	27402	Pdhx	TRUE	Pyruvate dehydrogenase protein X component, mitochondrial OS=Mus musculus OX=10090 GN=Pdhx PE=1 SV=1	36	12	47	12	48.024	115.36	12	54	2.90564e+06	4.50685e+06	4.73654e+06	3.04698e+06	2.5526e+06	1.3352e+07	3.42872e+06	9.36732e+06	7.34832e+06	1.79071e+07	6.32166e+06	7	8	9	6	4	11	7	9	9	11	7	7	8	9	6	4	11	7	9	9	11	7
Q8K2F8	67070	Lsm14a	FALSE	Protein LSM14 homolog A OS=Mus musculus OX=10090 GN=Lsm14a PE=1 SV=1	19	12	47	12	36.218	82.96	12	50.5	8.93982e+06	7.02244e+06	5.54565e+06	7.18988e+06	8.34409e+06	3.13845e+06	5.93894e+06	6.32932e+06	7.15924e+06	5.31912e+06	1.14692e+07	11	12	11	11	10	8	10	10	7	10	11	11	12	11	11	10	8	10	10	7	10	11
Q61838	11287	Pzp	FALSE	Pregnancy zone protein OS=Mus musculus OX=10090 GN=Pzp PE=1 SV=3	8	11	47	11	32.427	124.07	11	165.7	2.28483e+06	4.7076e+06	5.54412e+06	9.22013e+06	4.55555e+06	1.1117e+07	2.64838e+06	4.74515e+06	3.64222e+06	6.05025e+06	5.39098e+06	9	11	10	10	10	10	10	10	10	10	10	9	11	10	10	10	10	10	10	10	10	10
Q99LI2	229725	Clcc1	FALSE	Chloride channel CLIC-like protein 1 OS=Mus musculus OX=10090 GN=Clcc1 PE=1 SV=1	26	9	47	9	33.52	117.33	9	60.6	1.86742e+06	5.55249e+06	6.34213e+06	4.01067e+06	1.9766e+06	4.03592e+06	1.98491e+06	3.40695e+06	2.53361e+06	4.2984e+06	4.83367e+06	5	8	7	7	4	7	6	6	5	7	7	5	8	7	7	4	7	6	6	5	7	7
P70452	20909	Stx4a	FALSE	Syntaxin-4 OS=Mus musculus OX=10090 GN=Stx4 PE=1 SV=1	31	7	47	7	34.465	126.64	7	34.1	1.73885e+06	7.29588e+06	7.43504e+06	5.14071e+06	1.32428e+06	3.24933e+07	2.24093e+06	4.84837e+06	6.48189e+06	5.24277e+06	3.89304e+06	6	6	6	6	4	7	5	6	7	6	6	6	6	6	6	4	7	5	6	7	6	6
Q80UY2	74287	Kcmf1	FALSE	E3 ubiquitin-protein ligase KCMF1 OS=Mus musculus OX=10090 GN=Kcmf1 PE=1 SV=1	37	8	47	8	35.097	166.64	8	41.8	2.51347e+06	2.28807e+06	2.15583e+06	2.00173e+06	2.11569e+06	1.77773e+06	1.82785e+06	2.12614e+06	2.65034e+06	2.95488e+06	3.57778e+06	5	5	5	5	5	6	5	4	5	5	7	5	5	5	5	5	6	5	4	5	5	7
Q9DBB9	71756	Cpn2	FALSE	Carboxypeptidase N subunit 2 OS=Mus musculus OX=10090 GN=Cpn2 PE=1 SV=2	27	11	47	11	41.823	119.27	11	60.4	893775	4.14077e+06	5.66651e+06	6.70498e+06	730113	9.95934e+06	1.64435e+06	2529409	2.05557e+06	6.0119e+06	4.58364e+06	7	9	10	9	7	11	9	9	7	9	9	7	9	10	9	7	11	9	9	7	9	9
Q62422	20409	Ostf1	FALSE	Osteoclast-stimulating factor 1 OS=Mus musculus OX=10090 GN=Ostf1 PE=1 SV=2	33	5	47	5	24.339	135.39	5	23.8	2.80237e+06	1.11118e+07	1.24799e+07	8.41477e+06	4.78316e+06	1.82551e+07	6.02257e+06	1.15378e+07	1.6657e+07	2.01271e+07	1.42403e+07	5	5	5	5	5	5	5	5	5	5	5	5	5	5	5	5	5	5	5	5	5	5
P07310	12715	Ckm	FALSE	Creatine kinase M-type OS=Mus musculus OX=10090 GN=Ckm PE=1 SV=1	57	15	46	15	75.024	140.13	15	43	5.25248e+06	3.42514e+06	3.36111e+06	4.83067e+06	2.73575e+06	233048176	4.65744e+06	5.25642e+06	6.62671e+06	4.56848e+06	5.96743e+06	6	2	2	2	3	15	2	2	2	2	3	6	2	2	2	3	15	2	2	2	2	3
Q8K2H2	72201	Otud6b	FALSE	Deubiquitinase OTUD6B OS=Mus musculus OX=10090 GN=Otud6b PE=1 SV=1	31	6	46	6	24.992	158.87	6	33.7	1.71342e+06	3.53846e+06	3.58122e+06	3.28813e+06	2.7558e+06	6.60326e+06	4.87152e+06	4.77327e+06	1.01175e+07	9.67545e+06	5019871	5	6	6	6	6	6	6	6	6	6	6	5	6	6	6	6	6	6	6	6	6	6
P19426	27632	Nelfe	FALSE	Negative elongation factor E OS=Mus musculus OX=10090 GN=Nelfe PE=1 SV=2	32	9	46	9	42.166	139.8	9	42.5	2.98744e+06	2.02362e+06	2.06022e+06	2.31329e+06	3.63541e+06	1.08962e+06	2.71162e+06	1.69072e+06	3.68923e+06	1.97045e+06	3.10638e+06	8	8	8	9	9	5	9	7	7	7	8	8	8	8	9	9	5	9	7	7	7	8
Q5SSZ5	319939	Tns3	FALSE	Tensin-3 OS=Mus musculus OX=10090 GN=Tns3 PE=1 SV=1	11	8	46	8	29.671	146.71	8	155.5	3.06721e+06	3.67743e+06	2.7162e+06	2.87196e+06	3.21804e+06	2.51506e+06	2.49222e+06	3.06645e+06	3.18412e+06	2.59616e+06	4.13788e+06	6	7	7	7	7	6	5	7	8	6	6	6	7	7	7	7	6	5	7	8	6	6
Q9CPT5	28126	Nop16	FALSE	Nucleolar protein 16 OS=Mus musculus OX=10090 GN=Nop16 PE=1 SV=1	43	7	46	7	29.125	115.75	7	21.1	3.89073e+06	4.46723e+06	4.19575e+06	3.96078e+06	4.3441e+06	2.13817e+06	3.5815e+06	3.9446e+06	7.60799e+06	4.86308e+06	4.09778e+06	6	6	6	6	6	5	6	6	7	6	6	6	6	6	6	6	5	6	6	7	6	6
P55050	14079	Fabp2	FALSE	Fatty acid-binding protein, intestinal OS=Mus musculus OX=10090 GN=Fabp2 PE=1 SV=2	35	5	46	5	17.455	126.46	5	15.1	7.23286e+06	1.30999e+07	1.31291e+07	1.3321e+07	1.52667e+07	3.11328e+06	1.68888e+06	1.60047e+06	8.01451e+06	4.08338e+06	7.82433e+06	5	5	5	5	5	5	5	5	5	5	5	5	5	5	5	5	5	5	5	5	5	5
Q99PT1	192662	Arhgdia	FALSE	Rho GDP-dissociation inhibitor 1 OS=Mus musculus OX=10090 GN=Arhgdia PE=1 SV=3	44	6	46	6	24.485	147.18	6	23.4	2.13928e+06	1.84368e+06	2.19081e+06	2.56656e+06	1.9648e+06	3.49778e+06	2889245	3.10344e+06	4.6241e+06	5.35177e+06	3.57675e+06	5	5	6	6	4	6	6	5	6	6	6	5	5	6	6	4	6	6	5	6	6	6
Q8C1D8	73473	Iws1	FALSE	Protein IWS1 homolog OS=Mus musculus OX=10090 GN=Iws1 PE=1 SV=1	10	7	46	7	39.258	108.9	7	85.2	1.8408e+06	2.64526e+06	2.73825e+06	3.10407e+06	2.79912e+06	3.62915e+06	1.82608e+06	2.7385e+06	4.54914e+06	3.05834e+06	4.56984e+06	7	7	7	7	6	7	6	7	6	6	7	7	7	7	7	6	7	6	7	6	6	7
P38060	15356	Hmgcl	TRUE	Hydroxymethylglutaryl-CoA lyase, mitochondrial OS=Mus musculus OX=10090 GN=Hmgcl PE=1 SV=2	30	7	46	7	32.362	127.19	7	34.2	5.83583e+06	6.2765e+06	5.90913e+06	6.1437e+06	9.6025e+06	6.93668e+06	1.02612e+07	1.17017e+07	1.46045e+07	1.35752e+07	1.32401e+07	4	6	5	6	7	6	7	7	7	7	7	4	6	5	6	7	6	7	7	7	7	7
Q9CZW5	28185	Tomm70a	TRUE	Mitochondrial import receptor subunit TOM70 OS=Mus musculus OX=10090 GN=Tomm70 PE=1 SV=2	11	6	46	6	22.562	115.31	6	67.5	1.61558e+06	1.49548e+06	1.9531e+06	1.13703e+06	1.84043e+06	2.84474e+06	3.33425e+06	3.6428e+06	4.82439e+06	5.21892e+06	3.47949e+06	6	6	6	5	5	6	6	5	6	6	6	6	6	6	5	5	6	6	5	6	6	6
P06339	15040	H2-T23	FALSE	H-2 class I histocompatibility antigen, D-37 alpha chain OS=Mus musculus OX=10090 GN=H2-T23 PE=1 SV=1	13	4	46	2	13.72	96.24	4	40.8		40627	46929.9			41763.4		25785.5		33056.8	28534.3	2	3	3	2	2	4	2	3	3	4	3	2	3	3	2	2	4	2	3	3	4	3
Q99M87	83945	Dnaja3	TRUE	DnaJ homolog subfamily A member 3, mitochondrial OS=Mus musculus OX=10090 GN=Dnaja3 PE=1 SV=1	27	11	46	11	44.143	147.87	11	52.4	948604	983224	2.00849e+06	1.33277e+06	855166	7.17106e+06	5.45789e+06	6.75835e+06	1.17314e+07	1.81381e+07	4.82602e+06	5	5	6	5	3	9	8	8	8	11	7	5	5	6	5	3	9	8	8	8	11	7
Q9QZ85	60440	Iigp1	FALSE	Interferon-inducible GTPase 1 OS=Mus musculus OX=10090 GN=Iigp1 PE=1 SV=2	23	9	46	9	34.429	137.72	9	47.5	3.07093e+06	5.44975e+06	3.49747e+06	3.693e+06	2.61135e+06	1.71635e+06	1.3099e+06	1.11203e+06	504340	761474	7.00552e+06	9	9	9	9	9	9	8	6	4	5	9	9	9	9	9	9	9	8	6	4	5	9
P32507	19294	Nectin2	FALSE	Nectin-2 OS=Mus musculus OX=10090 GN=Nectin2 PE=1 SV=2	33	10	46	10	36.614	131.32	10	57.3	2.10056e+06	3.67524e+06	3.8554e+06	3.56264e+06	3.08692e+06	4.88883e+06	3.08575e+06	3.11078e+06	6.50703e+06	3.80643e+06	3.62653e+06	7	7	7	9	8	8	7	8	9	8	8	7	7	7	9	8	8	7	8	9	8	8
P70429	14026	Evl	FALSE	Ena/VASP-like protein OS=Mus musculus OX=10090 GN=Evl PE=1 SV=2	34	11	46	11	52.384	138.69	11	44.3	1.53062e+06	1.38921e+06	1.29475e+06	2.48832e+06	1.59546e+06	1.85313e+06	2898198	2.16739e+06	4.23307e+06	3.27477e+06	6.41384e+06	9	9	7	8	8	6	10	7	10	8	10	9	9	7	8	8	6	10	7	10	8	10
P26516	17463	Psmd7	FALSE	26S proteasome non-ATPase regulatory subunit 7 OS=Mus musculus OX=10090 GN=Psmd7 PE=1 SV=2	40	7	46	7	30.77	157.47	7	36.5	264116	4.49181e+06	4.29228e+06	2.47428e+06	647319	4.75932e+06	1.01019e+06	2.37964e+06	2.28989e+06	7.37406e+06	2.32592e+06	2	7	6	6	4	7	6	7	6	7	7	2	7	6	6	4	7	6	7	6	7	7
P28798	14824	Grn	FALSE	Progranulin OS=Mus musculus OX=10090 GN=Grn PE=1 SV=2	26	11	46	11	56.655	125.5	11	63.4	2.24116e+06	4.1857e+06	2.09074e+06	1.9803e+07	5.23961e+06	1.06323e+07	3.86103e+06	4.21395e+06	6.18742e+06	4.00268e+06	4.90306e+06	5	8	5	11	8	9	6	7	7	5	7	5	8	5	11	8	9	6	7	7	5	7
Q2KN98	74392	Specc1l	FALSE	Cytospin-A OS=Mus musculus OX=10090 GN=Specc1l PE=1 SV=1	13	12	46	11	42.573	152.88	12	124.4	3.4338e+06	2.85254e+06	2793373	2.88148e+06	3.17726e+06	2.89588e+06	3.02273e+06	3.12924e+06	3.74134e+06	3.2235e+06	5.2553e+06	11	11	11	11	11	11	11	11	10	9	11	11	11	11	11	11	11	11	11	10	9	11
Q9Z0F7	20618	Sncg	FALSE	Gamma-synuclein OS=Mus musculus OX=10090 GN=Sncg PE=1 SV=1	80	9	46	9	48.198	145.21	9	13.2	2.39675e+06	2.95911e+06	2.82511e+06	7.19097e+06	4.83635e+06	7.91195e+06	2.53283e+06	2.67614e+06	8.1683e+06	4.06852e+06	8799733	7	7	7	8	7	9	7	7	8	7	8	7	7	7	8	7	9	7	7	8	7	8
Q8BYU6	240832	Tor1aip2	FALSE	Torsin-1A-interacting protein 2 OS=Mus musculus OX=10090 GN=Tor1aip2 PE=1 SV=1	41	11	46	11	49.88	143.59	11	54.5	1.479e+06	3.69095e+06	4.30477e+06	3.25047e+06	2.27895e+06	6.86623e+06	1.6466e+06	1.80179e+06	2.23406e+06	5.75621e+06	4.47265e+06	6	10	8	10	8	10	6	5	4	10	8	6	10	8	10	8	10	6	5	4	10	8
Q8R035	68572	Mrpl58	TRUE	Peptidyl-tRNA hydrolase ICT1, mitochondrial OS=Mus musculus OX=10090 GN=Mrpl58 PE=1 SV=1	40	6	46	6	21.95	122.93	6	23.5	896723	2.98473e+06	3.24011e+06	2.29258e+06	2.184e+06	6.62634e+06	4.08235e+06	9.1113e+06	1.24659e+07	1.19445e+07	5.09557e+06	4	5	5	5	5	6	5	5	6	5	5	4	5	5	5	5	6	5	5	6	5	5
Q8VHE0	140740	Sec63	FALSE	Translocation protein SEC63 homolog OS=Mus musculus OX=10090 GN=Sec63 PE=1 SV=4	9	5	46	5	27.413	140.89	5	87.8	5.28437e+06	7.4031e+06	5.07025e+06	6.69582e+06	4.65623e+06	5.85877e+06	3.32566e+06	4.5542e+06	5.06205e+06	7.53463e+06	8.78422e+06	5	5	5	5	5	5	5	5	4	5	5	5	5	5	5	5	5	5	5	4	5	5
Q9CQS8	66212	Sec61b	FALSE	Protein transport protein Sec61 subunit beta OS=Mus musculus OX=10090 GN=Sec61b PE=1 SV=3	39	3	46	3	15.222	91.82	3	10	1.22605e+08	9.81367e+07	1.11239e+08	1.04269e+08	1.39739e+08	7.21062e+07	7.32909e+07	7.80147e+07	8.88833e+07	7.2555e+07	9.94675e+07	3	3	3	3	3	3	3	3	3	3	3	3	3	3	3	3	3	3	3	3	3	3
O54818	21987	Tpd52l1	FALSE	Tumor protein D53 OS=Mus musculus OX=10090 GN=Tpd52l1 PE=1 SV=1	44	6	45	6	27.178	115.72	6	22.5	1.68712e+06	1.4719e+06	2.07336e+06	1.98538e+06	3.26992e+06	964996	1.68303e+06	2.00555e+06	4.34431e+06	2.49059e+06	3.73327e+06	4	4	4	4	4	4	5	4	4	5	4	4	4	4	4	4	4	5	4	4	5	4
P07901	15519	Hsp90aa1	FALSE	Heat shock protein HSP 90-alpha OS=Mus musculus OX=10090 GN=Hsp90aa1 PE=1 SV=4	23	11	45	7	39.863	131.91	11	84.7	1.88358e+06	2.97468e+06	3.10495e+06	2.7608e+06	2.01093e+06	1.0393e+06	2.05767e+06	1.74294e+06	3.50237e+06	4.57811e+06	4.10599e+06	6	8	9	10	6	7	7	7	7	9	9	6	8	9	10	6	7	7	7	7	9	9
Q8CHG3	70297	Gcc2	FALSE	GRIP and coiled-coil domain-containing protein 2 OS=Mus musculus OX=10090 GN=Gcc2 PE=1 SV=2	9	13	45	13	41.645	114.96	13	194.3	921251	1.3073e+06	1.06741e+06	1.56608e+06	940613	1.98366e+06	1.80056e+06	1.17877e+06	1.97937e+06	2.23022e+06	1.44667e+06	6	8	7	8	6	9	11	8	7	10	7	6	8	7	8	6	9	11	8	7	10	7
Q9WV03	108160	Fam50a	FALSE	Protein FAM50A OS=Mus musculus OX=10090 GN=Fam50a PE=1 SV=1	33	8	45	8	44.075	117.76	8	40.2	1.87749e+06	4.06979e+06	4.06131e+06	3.6178e+06	2.45949e+06	6.80718e+06	5.09599e+06	7.42461e+06	1.0765e+07	7.46916e+06	5.82051e+06	7	7	8	7	6	8	8	8	8	8	8	7	7	8	7	6	8	8	8	8	8	8
Q8R086	211389	Suox	TRUE	Sulfite oxidase, mitochondrial OS=Mus musculus OX=10090 GN=Suox PE=1 SV=2	29	9	45	9	47.942	131.55	9	60.7	3.72736e+06	3.53699e+06	5.22252e+06	4.36473e+06	5.56807e+06	4.12145e+06	5.94689e+06	8.82956e+06	1.25981e+07	1.11727e+07	1.15302e+07	7	6	6	6	6	6	7	7	6	9	7	7	6	6	6	6	6	7	7	6	9	7
Q9QYI4	56709	Dnajb12	FALSE	DnaJ homolog subfamily B member 12 OS=Mus musculus OX=10090 GN=Dnajb12 PE=1 SV=2	37	9	45	9	35.193	113.25	9	42	1.34677e+06	4.36e+06	4.32713e+06	3.02522e+06	2.77238e+06	4.37746e+06	1.07171e+06	2.55555e+06	2.42081e+06	2.89853e+06	2.87387e+06	6	8	9	8	7	7	5	7	6	7	6	6	8	9	8	7	7	5	7	6	7	6
Q91WV0	13486	Dr1	FALSE	Protein Dr1 OS=Mus musculus OX=10090 GN=Dr1 PE=1 SV=1	38	5	45	5	18.709	146.14	5	19.4	5.53709e+06	7.21802e+06	8.08301e+06	8.15498e+06	6.84014e+06	7.91082e+06	7791538	7.37947e+06	1.59725e+07	1.14902e+07	1.11192e+07	5	5	5	5	5	5	5	5	5	5	5	5	5	5	5	5	5	5	5	5	5	5
P60060	20335	Sec61g	FALSE	Protein transport protein Sec61 subunit gamma OS=Mus musculus OX=10090 GN=Sec61g PE=3 SV=1	66	3	45	3	15.763	117.69	3	7.7	7.88075e+06	9.20218e+06	9.8191e+06	9.22884e+06	1.25176e+07	7.53288e+06	5.16649e+06	7.82398e+06	7.47306e+06	4.87239e+06	8.25463e+06	2	3	3	3	3	2	3	3	3	3	3	2	3	3	3	3	2	3	3	3	3	3
Q9CRC3	67290	3110040N11Rik	FALSE	UPF0235 protein C15orf40 homolog OS=Mus musculus OX=10090 PE=1 SV=1	64	6	45	6	21.55	117.13	6	13.2	6.50151e+06	4.5e+06	5.98681e+06	6.45138e+06	1.03912e+07	6.44636e+06	1.15236e+07	1.19753e+07	1.82724e+07	1.12931e+07	1.27233e+07	6	4	4	6	6	5	5	6	6	6	6	6	4	4	6	6	5	5	6	6	6	6
Q61646	15439	Hp	FALSE	Haptoglobin OS=Mus musculus OX=10090 GN=Hp PE=1 SV=1	13	7	45	7	33.272	126.16	7	38.7	3.17912e+07	1.22464e+07	1.01022e+07	1.67985e+07	2.80818e+07	6.59041e+06	3.84036e+06	7.22971e+06	1.89802e+07	5.48525e+06	1.5145e+07	6	5	4	6	6	4	4	4	6	4	6	6	5	4	6	6	4	4	4	6	4	6
Q91VD9	227197	Ndufs1	TRUE	NADH-ubiquinone oxidoreductase 75 kDa subunit, mitochondrial OS=Mus musculus OX=10090 GN=Ndufs1 PE=1 SV=2	11	7	45	7	31.152	112.08	7	79.7	2.10751e+06	1.78548e+06	2.7776e+06	2.6867e+06	2.3964e+06	9.619e+06	8.44912e+06	1.07063e+07	1.34362e+07	9.88682e+06	1.00624e+07	5	4	5	5	5	7	7	7	7	6	7	5	4	5	5	5	7	7	7	7	6	7
Q6A0A2	217980	Larp4b	FALSE	La-related protein 4B OS=Mus musculus OX=10090 GN=Larp4b PE=1 SV=2	13	9	45	9	27.649	114.51	9	81.6	7.54939e+06	5.07947e+06	4.8519e+06	3.70648e+06	6.39428e+06	3.1632e+06	4.21862e+06	4.69628e+06	5.17455e+06	5.83036e+06	7.52389e+06	8	9	9	9	8	8	7	8	7	8	9	8	9	9	9	8	8	7	8	7	8	9
Q60953	18854	Pml	FALSE	Protein PML OS=Mus musculus OX=10090 GN=Pml PE=1 SV=3	16	10	45	10	34.585	106.34	10	98.2	1.05844e+06	3.50006e+06	2.73046e+06	2.53461e+06	565604	3.12099e+06	865248	1.50208e+06	2.49994e+06	3.11486e+06	2.84461e+06	7	10	9	8	5	8	5	7	6	8	7	7	10	9	8	5	8	5	7	6	8	7
Q3UHX0	70930	Nol8	FALSE	Nucleolar protein 8 OS=Mus musculus OX=10090 GN=Nol8 PE=1 SV=2	10	8	45	8	34.612	118.72	8	128.6	3.43887e+06	1.70021e+06	1.6909e+06	1.67816e+06	2.50393e+06	3.43581e+06	4.55663e+06	3.43198e+06	5.76457e+06	5.93177e+06	3.58564e+06	8	7	6	6	8	8	8	8	8	8	8	8	7	6	6	8	8	8	8	8	8	8
P31428	13479	Dpep1	FALSE	Dipeptidase 1 OS=Mus musculus OX=10090 GN=Dpep1 PE=1 SV=2	34	11	45	11	39.487	139.37	11	45.7	1.67928e+06	2.81966e+06	2.3612e+06	5.72715e+06	4.33658e+06	1.75923e+07	4.17428e+06	5.37736e+06	5.72408e+06	4.04725e+06	3.35838e+06	8	8	8	9	9	11	7	9	8	7	7	8	8	8	9	9	11	7	9	8	7	7
Q8VC12	243537	Uroc1	FALSE	Urocanate hydratase OS=Mus musculus OX=10090 GN=Uroc1 PE=1 SV=2	22	10	45	10	35.87	121.58	10	74.5	3.47433e+06	3.17759e+06	2.80529e+06	3.39008e+06	3.97514e+06	1.5986e+06	2.4504e+06	2.97779e+06	2.66086e+06	2.58079e+06	3.04614e+06	10	8	8	9	10	6	7	7	8	8	9	10	8	8	9	10	6	7	7	8	8	9
Q8BSY0	65973	Asph	FALSE	Aspartyl/asparaginyl beta-hydroxylase OS=Mus musculus OX=10090 GN=Asph PE=1 SV=1	13	4	45	4	17.22	139.56	4	83	1.59218e+06	2.85864e+06	2.66876e+06	1.79952e+06	1.4304e+06	4.89204e+06	1.82052e+06	2.21778e+06	2.40601e+06	3.71503e+06	3.02535e+06	3	3	3	3	3	4	2	3	2	3	3	3	3	3	3	3	4	2	3	2	3	3
O35841	11800	Api5	FALSE	Apoptosis inhibitor 5 OS=Mus musculus OX=10090 GN=Api5 PE=1 SV=2	24	9	45	9	37.459	148.37	9	56.8	972587	6.84436e+06	3.23938e+06	3.46492e+06	1.32257e+06	6.98893e+06	4.16069e+06	4.50073e+06	4.69447e+06	8.8829e+06	5.59974e+06	5	9	8	9	6	9	9	9	7	9	9	5	9	8	9	6	9	9	9	7	9	9
Q3UDK1	231712	Trafd1	FALSE	TRAF-type zinc finger domain-containing protein 1 OS=Mus musculus OX=10090 GN=Trafd1 PE=1 SV=1	22	9	45	9	36.414	120.01	9	64.2	1.24758e+06	2.36227e+06	3.22466e+06	1.72648e+06	1.59351e+06	2.45277e+06	1.74492e+06	804737	1.92259e+06	2.76541e+06	4.88775e+06	5	8	8	7	6	7	8	5	7	8	8	5	8	8	7	6	7	8	5	7	8	8
Q9QXC1	59083	Fetub	FALSE	Fetuin-B OS=Mus musculus OX=10090 GN=Fetub PE=1 SV=1	45	11	45	11	49.426	121.3	11	42.7	1.10436e+07	1.10395e+07	1.08112e+07	1.48905e+07	1.04892e+07	1.40748e+07	1.05517e+07	1.29339e+07	1.09732e+07	1.11289e+07	1.26576e+07	6	8	7	10	7	10	6	7	6	6	7	6	8	7	10	7	10	6	7	6	6	7
P97478	12850	Coq7	TRUE	5-demethoxyubiquinone hydroxylase, mitochondrial OS=Mus musculus OX=10090 GN=Coq7 PE=1 SV=3	50	8	45	8	38.441	130.25	8	24	275384	2.65987e+06	2.62153e+06	1.20814e+06	341312	6.36707e+06	1.3797e+06	5.04734e+06	5.17309e+06	8.63958e+06	2513031	3	7	7	6	3	7	5	7	7	7	6	3	7	7	6	3	7	5	7	7	7	6
Q9WU40	380664	Lemd3	FALSE	Inner nuclear membrane protein Man1 OS=Mus musculus OX=10090 GN=Lemd3 PE=1 SV=2	23	10	45	10	44.463	150.04	10	100.2	3.49915e+06	2.48233e+06	1.89681e+06	2.17266e+06	3.88998e+06	2.10167e+06	3.0186e+06	2.39119e+06	4.42692e+06	1.86593e+06	5.48378e+06	9	6	6	6	8	4	8	6	7	5	8	9	6	6	6	8	4	8	6	7	5	8
P57784	68981	Snrpa1	FALSE	U2 small nuclear ribonucleoprotein A' OS=Mus musculus OX=10090 GN=Snrpa1 PE=1 SV=2	52	8	44	8	34.901	127.1	8	28.3	840951	4.70574e+06	4.32708e+06	3.26233e+06	1.66169e+06	5.49434e+06	2.24809e+06	3.70067e+06	6.40498e+06	8.4259e+06	5.00847e+06	5	8	7	8	6	8	6	6	7	8	7	5	8	7	8	6	8	6	6	7	8	7
P11031	20024	Sub1	FALSE	Activated RNA polymerase II transcriptional coactivator p15 OS=Mus musculus OX=10090 GN=Sub1 PE=1 SV=3	38	6	44	6	27.956	109.11	6	14.4	3.11571e+06	5.8204e+06	7.39915e+06	5.98959e+06	5.1723e+06	8.83699e+06	1.56845e+06	4.66979e+06	9.13485e+06	1.06449e+07	9.78555e+06	5	5	5	5	5	5	3	5	6	5	5	5	5	5	5	5	5	3	5	6	5	5
Q9CYX7	67223	Rrp15	FALSE	RRP15-like protein OS=Mus musculus OX=10090 GN=Rrp15 PE=1 SV=2	13	6	44	6	15.533	86.26	6	31	6.78833e+06	4.26225e+06	3.62758e+06	4.2577e+06	8.83558e+06	3.67949e+06	6.46015e+06	5.16855e+06	1.25387e+07	5.78441e+06	6.74613e+06	6	5	5	5	5	5	6	5	6	5	5	6	5	5	5	5	5	6	5	6	5	5
Q63886	394436	Ugt1a1	FALSE	UDP-glucuronosyltransferase 1A1 OS=Mus musculus OX=10090 GN=Ugt1a1 PE=1 SV=2	16	6	44	5	35.515	144.16	6	60	2.77665e+06	7.98317e+06	9.99281e+06	7155890	3.77517e+06	3.80718e+06	2.44034e+06	3.81224e+06	4.27421e+06	3.93654e+06	6.27509e+06	5	6	5	5	5	5	5	5	5	5	5	5	6	5	5	5	5	5	5	5	5	5
Q61687	22589	Atrx	FALSE	Transcriptional regulator ATRX OS=Mus musculus OX=10090 GN=Atrx PE=1 SV=3	5	8	44	8	33.274	109.31	8	278.4	2.5188e+06	2.73675e+06	1.78407e+06	2.30438e+06	2.80778e+06	2.46719e+06	1.88456e+06	1.95379e+06	3.61736e+06	3.52321e+06	3.10244e+06	6	7	5	6	6	7	6	6	6	7	7	6	7	5	6	6	7	6	6	6	7	7
Q9Z2F7	12177	Bnip3l	TRUE	BCL2/adenovirus E1B 19 kDa protein-interacting protein 3-like OS=Mus musculus OX=10090 GN=Bnip3l PE=1 SV=1	30	5	44	5	21.431	134.21	5	23.8	3.25272e+06	2.23749e+06	3.33385e+06	2.86295e+06	6.22225e+06	1.89548e+06	2.95643e+06	3.49861e+06	4.47484e+06	2.9392e+06	5.41344e+06	4	4	4	4	5	4	4	4	4	4	4	4	4	4	4	5	4	4	4	4	4	4
Q07797	19039	Lgals3bp	FALSE	Galectin-3-binding protein OS=Mus musculus OX=10090 GN=Lgals3bp PE=1 SV=1	18	7	44	7	36.339	110.94	7	64.5	6.69615e+06	7.17707e+06	7.39279e+06	1.55333e+07	5.83228e+06	1.01292e+07	8.56757e+06	9.45396e+06	2.45219e+07	1.79245e+07	1.84815e+07	3	6	5	6	4	6	5	4	7	5	5	3	6	5	6	4	6	5	4	7	5	5
Q69ZQ2	57905	Isy1	FALSE	Pre-mRNA-splicing factor ISY1 homolog OS=Mus musculus OX=10090 GN=Isy1 PE=1 SV=2	24	6	44	6	25.878	138.42	6	33	3.74081e+06	3.75729e+06	3.32713e+06	2.63375e+06	4.2001e+06	2.87927e+06	2.77143e+06	3.11273e+06	6.13329e+06	4.1665e+06	3.82704e+06	5	5	5	5	5	5	5	5	6	5	4	5	5	5	5	5	5	5	5	6	5	4
Q3UHJ0	269774	Aak1	FALSE	AP2-associated protein kinase 1 OS=Mus musculus OX=10090 GN=Aak1 PE=1 SV=2	14	7	44	7	35.414	128.78	7	103.3	3.58166e+06	2.76694e+06	2.12252e+06	2.38961e+06	2.77115e+06	2.10174e+06	2.71959e+06	2.40006e+06	3.45166e+06	3.48686e+06	4.31931e+06	6	7	6	7	7	6	7	7	6	6	7	6	7	6	7	7	6	7	7	6	6	7
Q9D0Y8	68836	Mrpl52	TRUE	39S ribosomal protein L52, mitochondrial OS=Mus musculus OX=10090 GN=Mrpl52 PE=1 SV=1	47	4	44	4	24.292	149.53	4	13.6	689680	733307	476554	928813	1.23517e+06	1.88898e+06	2.09069e+06	3.55721e+06	5.37716e+06	4.34422e+06	3.18593e+06	4	2	3	4	4	4	3	4	4	4	4	4	2	3	4	4	4	3	4	4	4	4
P25688	22262	Uox	FALSE	Uricase OS=Mus musculus OX=10090 GN=Uox PE=1 SV=2	29	7	44	7	41.134	131.05	7	35	2.60526e+06	3.97814e+06	5.66079e+06	4.39772e+06	4.49333e+06	4.59391e+06	1.66452e+06	4.56143e+06	1.3857e+06	4.16931e+06	4.39609e+06	5	7	7	7	6	6	5	7	4	6	4	5	7	7	7	6	6	5	7	4	6	4
Q91WZ8	94245	Dtnbp1	FALSE	Dysbindin OS=Mus musculus OX=10090 GN=Dtnbp1 PE=1 SV=1	15	5	44	5	21.078	102.58	5	39.6	1.78366e+06	2.50105e+06	2.43124e+06	2.52619e+06	2.35999e+06	5.14695e+06	3.70534e+06	3.37579e+06	8.40517e+06	6.12158e+06	4.19109e+06	5	5	5	5	5	5	5	5	5	5	5	5	5	5	5	5	5	5	5	5	5	5
Q6URW6	71960	Myh14	FALSE	Myosin-14 OS=Mus musculus OX=10090 GN=Myh14 PE=1 SV=1	5	10	44	8	31.784	123.04	10	228.4	8.43787e+06	6.12497e+06	4.95554e+06	7.99884e+06	7.45751e+06	7.05435e+06	1.03472e+07	6.62026e+06	1.13889e+07	8.59224e+06	1.11346e+07	8	7	8	8	6	7	6	5	6	7	7	8	7	8	8	6	7	6	5	6	7	7
Q60590	18405	Orm1	FALSE	Alpha-1-acid glycoprotein 1 OS=Mus musculus OX=10090 GN=Orm1 PE=1 SV=1	31	5	44	3	22.818	120.59	5	23.9	2.99726e+06	4.76408e+06	5.51534e+06	9.57961e+06	2.69602e+06	1.72588e+07	4.75701e+06	4.02629e+06	3.11745e+06	6.62669e+06	9.16737e+06	5	5	5	5	5	5	5	4	3	5	5	5	5	5	5	5	5	5	4	3	5	5
Q9CPW3	66047	Mrpl54	TRUE	39S ribosomal protein L54, mitochondrial OS=Mus musculus OX=10090 GN=Mrpl54 PE=1 SV=1	50	6	44	6	24.366	136.92	6	15.4	7.29553e+06	4.77135e+06	4.04448e+06	5.11934e+06	9.54935e+06	8.46988e+06	1.51213e+07	1.68696e+07	2.44735e+07	1.73889e+07	1.42425e+07	5	5	5	4	5	5	6	5	6	5	5	5	5	5	4	5	5	6	5	6	5	5
P70699	14387	Gaa	FALSE	Lysosomal alpha-glucosidase OS=Mus musculus OX=10090 GN=Gaa PE=1 SV=2	7	7	43	7	24.129	105.4	7	106.2	4.57949e+06	4.64775e+06	6.45508e+06	7.14996e+06	7.48464e+06	4.9323e+06	2.82647e+06	5.02245e+06	9.77e+06	6.38248e+06	6.8544e+06	7	7	7	7	7	7	6	6	7	6	7	7	7	7	7	7	7	6	6	7	6	7
Q61337	12015	Bad	TRUE	Bcl2-associated agonist of cell death OS=Mus musculus OX=10090 GN=Bad PE=1 SV=1	45	6	43	6	28.476	126.58	6	22.1	5.17995e+06	4.28438e+06	3.89327e+06	4.74311e+06	8.46303e+06	3.38575e+06	5.6162e+06	5.91963e+06	8.38747e+06	4.37333e+06	8.30885e+06	6	6	6	6	6	6	6	6	6	5	6	6	6	6	6	6	6	6	6	6	5	6
Q6ZQ03	55935	Fnbp4	FALSE	Formin-binding protein 4 OS=Mus musculus OX=10090 GN=Fnbp4 PE=1 SV=2	10	9	43	9	36.743	99.28	9	111.2	2.67258e+06	2.20234e+06	1.96908e+06	2.1115e+06	3.17793e+06	2.43331e+06	1.96868e+06	1.98082e+06	3.86381e+06	2.0979e+06	3.65203e+06	9	9	8	8	9	9	7	8	9	6	8	9	9	8	8	9	9	7	8	9	6	8
Q52KI8	51796	Srrm1	FALSE	Serine/arginine repetitive matrix protein 1 OS=Mus musculus OX=10090 GN=Srrm1 PE=1 SV=2	13	8	43	8	35.686	124.34	8	106.8	3.44612e+06	3.16669e+06	2.58206e+06	2.54137e+06	4.30085e+06	3.32183e+06	1.34242e+06	2.34819e+06	4.26433e+06	4.44538e+06	4.69278e+06	5	7	6	7	6	6	4	6	4	7	6	5	7	6	7	6	6	4	6	4	7	6
Q3U962	12832	Col5a2	FALSE	Collagen alpha-2(V) chain OS=Mus musculus OX=10090 GN=Col5a2 PE=1 SV=1	4	5	43	5	18.011	110.17	5	144.9	6.26575e+06	5.28035e+06	7.57141e+06	2.03628e+07	1.15063e+07	2.52096e+07	5.73957e+06	8.17062e+06	1.6391e+07	5.28337e+06	1.72632e+07	5	4	5	5	5	5	5	5	5	5	5	5	4	5	5	5	5	5	5	5	5	5
Q6A026	71521	Pds5a	FALSE	Sister chromatid cohesion protein PDS5 homolog A OS=Mus musculus OX=10090 GN=Pds5a PE=1 SV=3	8	9	43	9	37.143	140.15	9	150.2	2.45215e+06	1.93354e+06	1.1247e+06	2.01169e+06	2.89304e+06	849758	1.24912e+06	1.51011e+06	1.52788e+06	1.55411e+06	2.78293e+06	9	8	8	8	7	3	7	7	6	7	8	9	8	8	8	7	3	7	7	6	7	8
Q9R0M4	27205	Podxl	FALSE	Podocalyxin OS=Mus musculus OX=10090 GN=Podxl PE=1 SV=2	17	5	43	5	22.376	93.33	5	53.4	3.8842e+06	5.22041e+06	5.67283e+06	8.05311e+06	6.8617e+06	7.32425e+06	4.10135e+06	5.416e+06	1.1659e+07	6.49696e+06	12442115	4	4	4	4	4	4	4	4	5	4	5	4	4	4	4	4	4	4	4	5	4	5
Q9CR61	66916	Ndufb7	TRUE	NADH dehydrogenase [ubiquinone] 1 beta subcomplex subunit 7 OS=Mus musculus OX=10090 GN=Ndufb7 PE=1 SV=3	70	8	43	8	27.986	103.04	8	16.3	1.11403e+06	2.80853e+06	1.92069e+06	1.94356e+06	1.09792e+06	1.05165e+07	4.53555e+06	1.27112e+07	7.33298e+06	8.56573e+06	4.70602e+06	4	5	5	5	3	8	7	7	6	8	7	4	5	5	5	3	8	7	7	6	8	7
Q3U0S6	69903	Rasip1	FALSE	Ras-interacting protein 1 OS=Mus musculus OX=10090 GN=Rasip1 PE=1 SV=3	9	6	43	6	22.851	126.84	6	103.5	1.34077e+06	1.97954e+06	1.21694e+06	1.15189e+06	1.56787e+06	1.54929e+06	1.65161e+06	2.75505e+06	2.61353e+06	2.84194e+06	2.50374e+06	5	6	6	6	6	6	5	6	6	6	6	5	6	6	6	6	6	5	6	6	6	6
Q8JZS0	108030	Lin7a	FALSE	Protein lin-7 homolog A OS=Mus musculus OX=10090 GN=Lin7a PE=1 SV=2	32	7	43	4	26.946	100.02	7	26	1.79204e+06	7.12233e+06	6.8306e+06	4923533	3.16547e+06	7.68326e+06	4.6191e+06	6.24575e+06	2.15106e+07	1.0362e+07	7.06058e+06	5	7	7	7	6	7	5	7	7	6	7	5	7	7	7	6	7	5	7	7	6	7
Q9DCT8	68337	Crip2	FALSE	Cysteine-rich protein 2 OS=Mus musculus OX=10090 GN=Crip2 PE=1 SV=1	34	3	43	3	18.615	146.75	3	22.7	12324234	1.80075e+07	17492542	13862944	1.92934e+07	1.80135e+07	1.6286e+07	2.38819e+07	3.19526e+07	1.79116e+07	2.47627e+07	3	3	3	3	3	3	3	3	3	3	3	3	3	3	3	3	3	3	3	3	3	3
Q9D287	68183	Bcas2	FALSE	Pre-mRNA-splicing factor SPF27 OS=Mus musculus OX=10090 GN=Bcas2 PE=1 SV=1	48	9	43	9	32.908	139.52	9	26.1	1.51773e+06	4.10282e+06	4.21754e+06	3.70003e+06	2.25741e+06	5.51268e+06	2.68402e+06	3.56757e+06	7.64094e+06	5.5057e+06	4.7994e+06	7	9	9	8	7	9	7	9	9	9	9	7	9	9	8	7	9	7	9	9	9	9
Q9JII6	58810	Akr1a1	FALSE	Aldo-keto reductase family 1 member A1 OS=Mus musculus OX=10090 GN=Akr1a1 PE=1 SV=3	32	9	42	9	30.594	107.71	9	36.6	4.10828e+06	5.27387e+06	5.79426e+06	4.23597e+06	6.56108e+06	5.85602e+06	3.74886e+06	5.72001e+06	6.21058e+06	7.85386e+06	6.77934e+06	8	9	8	6	6	9	6	8	7	8	7	8	9	8	6	6	9	6	8	7	8	7
Q8BNX1	75863	Clec4g	FALSE	C-type lectin domain family 4 member G OS=Mus musculus OX=10090 GN=Clec4g PE=1 SV=1	13	4	42	4	12.694	85.38	4	33.3	1.53014e+06	4.59057e+06	6438002	4.34886e+06	2.64987e+06	3.55038e+06	1.56229e+06	2.71101e+06	2.88959e+06	3.21735e+06	4.65826e+06	4	4	4	4	4	4	4	4	4	4	4	4	4	4	4	4	4	4	4	4	4	4
Q9DCZ4	68316	Apoo	TRUE	MICOS complex subunit Mic26 OS=Mus musculus OX=10090 GN=Apoo PE=1 SV=2	39	6	42	6	20.952	102.42	6	22.6	1.02533e+06	2.35931e+06	2.96408e+06	1.96551e+06	1.52e+06	5.92779e+06	2.61477e+06	6.78621e+06	5.44105e+06	8.12667e+06	3.55212e+06	4	5	6	5	4	6	5	6	6	6	5	4	5	6	5	4	6	5	6	6	6	5
P19096	14104	Fasn	TRUE	Fatty acid synthase OS=Mus musculus OX=10090 GN=Fasn PE=1 SV=2	4	7	42	7	35.126	111.56	7	272.3	2.34034e+06	6.49877e+06	7.38784e+06	7.51759e+06	6.89396e+06	4.77455e+06	1.93398e+06	3.06968e+06	1.28748e+06	2.29363e+06	7.37207e+06	4	7	7	6	6	5	4	4	3	4	5	4	7	7	6	6	5	4	4	3	4	5
Q3UW53	63913	Niban1	FALSE	Protein Niban 1 OS=Mus musculus OX=10090 GN=Niban1 PE=1 SV=2	16	9	42	9	38.119	146.54	9	102.6	1.38577e+06	1.63488e+06	1.33336e+06	2.46879e+06	1.57416e+06	3.68078e+06	9.18927e+06	4.04453e+06	1.57298e+07	1.39849e+07	7.40438e+06	2	5	4	4	5	6	7	5	7	9	6	2	5	4	4	5	6	7	5	7	9	6
Q9DCH6	65098	Zfand6	FALSE	AN1-type zinc finger protein 6 OS=Mus musculus OX=10090 GN=Zfand6 PE=1 SV=1	32	6	42	6	22.928	113.93	6	24	8.46235e+06	5.48942e+06	4.89628e+06	5.45572e+06	1.09292e+07	3.4963e+06	4.59195e+06	4.97214e+06	9.89075e+06	5.68175e+06	9.21977e+06	5	6	5	6	6	3	3	3	5	5	6	5	6	5	6	6	3	3	3	5	5	6
Q9CXK9	381626	Rbm33	FALSE	RNA-binding protein 33 OS=Mus musculus OX=10090 GN=Rbm33 PE=1 SV=2	8	6	42	6	32.169	113.91	6	137.2	4.91658e+06	3.9635e+06	3.00109e+06	2.96517e+06	5.35111e+06	2.41598e+06	2.65934e+06	2.57071e+06	5.27742e+06	4.19611e+06	4.83557e+06	6	6	6	6	6	6	6	5	6	6	6	6	6	6	6	6	6	6	5	6	6	6
Q8BQ30	76448	Ppp1r18	FALSE	Phostensin OS=Mus musculus OX=10090 GN=Ppp1r18 PE=1 SV=1	25	9	42	9	28.489	127.16	9	65.6	3.116e+06	2.24221e+06	1.5599e+06	1.91504e+06	1.52504e+06	1.9864e+06	2678963	2.13991e+06	3.15746e+06	2.88723e+06	4.66325e+06	9	7	5	7	6	6	8	6	7	7	8	9	7	5	7	6	6	8	6	7	7	8
Q67FY2	80288	Bcl9l	FALSE	B-cell CLL/lymphoma 9-like protein OS=Mus musculus OX=10090 GN=Bcl9l PE=1 SV=1	10	11	42	11	35.691	120.12	11	156.6	4.50393e+06	3.65929e+06	4.08232e+06	3.42185e+06	4.88336e+06	4.35182e+06	3.16014e+06	3.30152e+06	4.57035e+06	3.51883e+06	5.42409e+06	8	7	7	9	10	6	7	8	8	8	8	8	7	7	9	10	6	7	8	8	8	8
Q9D1L9	68576	Lamtor5	FALSE	Ragulator complex protein LAMTOR5 OS=Mus musculus OX=10090 GN=Lamtor5 PE=1 SV=1	97	5	42	5	26.977	141	5	9.6	9.71776e+06	1.11965e+07	1.15661e+07	1.51637e+07	1.4744e+07	1.06876e+07	1.44921e+07	1.51598e+07	2.64277e+07	2.5999e+07	2.22544e+07	4	4	4	5	5	4	4	3	5	4	4	4	4	4	5	5	4	4	3	5	4	4
C0HKG5	68195	Rnaset2b	FALSE	Ribonuclease T2-A OS=Mus musculus OX=10090 GN=Rnaset2a PE=1 SV=1	21	5	42	5	31.767	137.89	5	29.6	2.44421e+06	9.53404e+06	9.55253e+06	7.90709e+06	5.56792e+06	5.48055e+06	3.06755e+06	5.88205e+06	1.21038e+07	7.77242e+06	1.07374e+07	4	5	5	5	4	4	5	4	5	4	5	4	5	5	5	4	4	5	4	5	4	5
Q8C6I2	66072	Sdhaf2	TRUE	Succinate dehydrogenase assembly factor 2, mitochondrial OS=Mus musculus OX=10090 GN=Sdhaf2 PE=1 SV=1	32	7	42	7	23.942	94.39	7	19.4	923283	2.0167e+06	1.6448e+06	1.82971e+06	1.57967e+06	6.94526e+06	6.6474e+06	8.85204e+06	1.75255e+07	15588813	6.60644e+06	5	7	6	6	5	7	7	7	7	7	7	5	7	6	6	5	7	7	7	7	7	7
Q08091	12797	Cnn1	FALSE	Calponin-1 OS=Mus musculus OX=10090 GN=Cnn1 PE=1 SV=1	53	11	41	11	45.132	112.13	11	33.3	793661	2.56466e+06	3.34376e+06	1.22766e+07	1.2143e+06	1.79455e+07	1.8379e+06	1.86095e+06	2.96529e+06	2.15137e+06	7.20312e+06	4	9	10	11	4	11	8	5	8	8	11	4	9	10	11	4	11	8	5	8	8	11
P70444	12122	Bid	TRUE	BH3-interacting domain death agonist OS=Mus musculus OX=10090 GN=Bid PE=1 SV=2	51	6	41	6	34.495	133.57	6	21.9	4.13807e+06	6.79153e+06	7.21083e+06	7.58621e+06	6.53508e+06	12956765	8.72865e+06	9.25167e+06	1.45842e+07	1.15474e+07	1.25299e+07	3	4	5	5	4	5	4	5	4	5	4	3	4	5	5	4	5	4	5	4	5	4
Q8BMS1	97212	Hadha	TRUE	Trifunctional enzyme subunit alpha, mitochondrial OS=Mus musculus OX=10090 GN=Hadha PE=1 SV=1	16	10	41	10	39.052	116.03	10	82.6	3.26387e+06	2.55754e+06	1.85395e+06	1.69227e+06	3.38057e+06	3.12856e+06	3.47305e+06	4.51349e+06	4.97997e+06	6.35512e+06	3.88587e+06	8	8	7	6	8	8	8	9	8	9	7	8	8	7	6	8	8	8	9	8	9	7
P17225	19205	Ptbp1	FALSE	Polypyrimidine tract-binding protein 1 OS=Mus musculus OX=10090 GN=Ptbp1 PE=1 SV=2	14	5	41	5	21.667	124.92	5	56.4	5.56097e+06	4903396	4.206e+06	5.28029e+06	7.053e+06	3.96175e+06	4.29057e+06	5.35521e+06	8.3968e+06	5.41068e+06	8.22762e+06	5	6	6	6	5	6	6	6	6	6	5	5	6	6	6	5	6	6	6	6	6	5
Q9D898	74192	Arpc5l	FALSE	Actin-related protein 2/3 complex subunit 5-like protein OS=Mus musculus OX=10090 GN=Arpc5l PE=1 SV=1	59	5	41	5	23.437	96.16	5	17	4.23041e+06	1.16857e+07	1.05139e+07	9.43162e+06	8583967	1.16944e+07	6.82545e+06	1.37193e+07	1.34043e+07	1.02932e+07	9.84462e+06	5	5	5	5	5	5	5	5	4	4	4	5	5	5	5	5	5	5	5	4	4	4
Q9QXD8	29806	Limd1	FALSE	LIM domain-containing protein 1 OS=Mus musculus OX=10090 GN=Limd1 PE=1 SV=2	19	7	41	7	30.524	139.18	7	71.4	3.33943e+06	2.25513e+06	1.63713e+06	2.13645e+06	3.31402e+06	2.51655e+06	3.26634e+06	3.6872e+06	4.81944e+06	3.32566e+06	4.74626e+06	7	5	4	4	5	6	7	5	5	5	6	7	5	4	4	5	6	7	5	5	5	6
Q8C5R2	227545	Proser2	FALSE	Proline and serine-rich protein 2 OS=Mus musculus OX=10090 GN=Proser2 PE=1 SV=3	23	8	41	8	31.104	117.79	8	50.4	3.9035e+06	3.20706e+06	4.11618e+06	4.05886e+06	4.69683e+06	1.07793e+06	2.31033e+06	3.02375e+06	3.43425e+06	1.70557e+06	4.79559e+06	7	8	7	7	7	3	7	7	6	6	7	7	8	7	7	7	3	7	7	6	6	7
Q07235	20720	Serpine2	FALSE	Glia-derived nexin OS=Mus musculus OX=10090 GN=Serpine2 PE=1 SV=2	35	10	41	10	35.846	106.82	10	44.2	3.30182e+06	1.78499e+06	1.69107e+06	2.74525e+06	3.90277e+06	1.13897e+06	1.8597e+06	2.72321e+06	2.93247e+06	2.90175e+06	2.68137e+06	10	7	6	7	8	4	6	6	7	6	6	10	7	6	7	8	4	6	6	7	6	6
Q8VCN5	107869	Cth	FALSE	Cystathionine gamma-lyase OS=Mus musculus OX=10090 GN=Cth PE=1 SV=1	21	6	41	6	24.88	132.86	6	43.5	4.10841e+06	5369768	7.95819e+06	5.85376e+06	7.23309e+06	4.6515e+06	5.0824e+06	5.65806e+06	5.94767e+06	5.94469e+06	6.44567e+06	6	6	6	5	5	5	5	5	5	6	5	6	6	6	5	5	5	5	5	5	6	5
Q62433	17988	Ndrg1	FALSE	Protein NDRG1 OS=Mus musculus OX=10090 GN=Ndrg1 PE=1 SV=1	34	9	41	9	38.436	104.86	9	43	63898.8	2.25478e+06	2.56082e+06	1.57323e+06	117870	5.02322e+06	913670	2.03563e+06	6.15625e+06	6.53451e+06	2.41924e+06	2	3	4	5	2	7	3	6	8	9	5	2	3	4	5	2	7	3	6	8	9	5
Q5SRX1	216810	Tom1l2	FALSE	TOM1-like protein 2 OS=Mus musculus OX=10090 GN=Tom1l2 PE=1 SV=1	25	11	41	11	42.404	123.59	11	55.6	957366	1.61995e+06	1.82734e+06	1.35547e+06	895342	4.14038e+06	2.22845e+06	2.72619e+06	4.96745e+06	4.63794e+06	2.63591e+06	4	8	8	6	5	10	6	6	8	9	6	4	8	8	6	5	10	6	6	8	9	6
Q3U1F9	94212	Pag1	FALSE	Phosphoprotein associated with glycosphingolipid-enriched microdomains 1 OS=Mus musculus OX=10090 GN=Pag1 PE=1 SV=2	27	7	41	7	28.02	116.36	7	46.5	3.64423e+06	3.6855e+06	4.35915e+06	4.82721e+06	5.95742e+06	3.20579e+06	3.00709e+06	3.47746e+06	4.70109e+06	3.48299e+06	6.13391e+06	6	6	7	7	6	7	5	6	5	6	5	6	6	7	7	6	7	5	6	5	6	5
Q8R550	58194	Sh3kbp1	FALSE	SH3 domain-containing kinase-binding protein 1 OS=Mus musculus OX=10090 GN=Sh3kbp1 PE=1 SV=1	21	12	41	12	39.957	104.36	12	78.1	2.1759e+06	2.97644e+06	2.41574e+06	2.42973e+06	2.5822e+06	2.64525e+06	3.79204e+06	3.21029e+06	4.59621e+06	5.52069e+06	6.24198e+06	9	12	10	10	9	9	12	10	11	12	12	9	12	10	10	9	9	12	10	11	12	12
Q7TPE5	66432	Slc7a6os	FALSE	Probable RNA polymerase II nuclear localization protein SLC7A6OS OS=Mus musculus OX=10090 GN=Slc7a6os PE=1 SV=1	20	5	41	5	19.366	107.62	5	35	3.96989e+06	3.98073e+06	4.15521e+06	3.7876e+06	4.75399e+06	3.79359e+06	3.89814e+06	3.28574e+06	5.48334e+06	3.21381e+06	5.6157e+06	5	5	5	5	5	5	5	5	4	4	5	5	5	5	5	5	5	5	5	4	4	5
Q64092	209446	Tfe3	FALSE	Transcription factor E3 OS=Mus musculus OX=10090 GN=Tfe3 PE=1 SV=2	19	8	41	6	25.2	108.52	8	61.5	1.88736e+06	2.27041e+06	1.65546e+06	2.20939e+06	2.91703e+06	2.23989e+06	2.37868e+06	2.65513e+06	3.95656e+06	2.73025e+06	4.11683e+06	6	6	5	7	8	6	8	8	8	7	8	6	6	5	7	8	6	8	8	8	7	8
P0DOV2	15951	Ifi204	FALSE	Interferon-activable protein 204 OS=Mus musculus OX=10090 GN=Ifi204 PE=1 SV=1	17	7	41	2	27.2	127.92	7	69.4	1.28509e+06	2.56876e+06	2.13536e+06	1.67893e+06	1.42842e+06	3.1718e+06	2.44239e+06	2.38531e+06	4.84715e+06	3.16041e+06	5.17069e+06	4	6	6	5	6	6	7	6	6	7	7	4	6	6	5	6	6	7	6	6	7	7
Q7TPR4	109711	Actn1	FALSE	Alpha-actinin-1 OS=Mus musculus OX=10090 GN=Actn1 PE=1 SV=1	10	8	41	1	29.257	117.75	8	103	15163.4	115538	117680	67249.4		190281	31872.3	79678.5	77592.7	202762	63799.4	4	8	8	6	4	8	5	7	6	8	7	4	8	8	6	4	8	5	7	6	8	7
P61089	93765	Ube2n	FALSE	Ubiquitin-conjugating enzyme E2 N OS=Mus musculus OX=10090 GN=Ube2n PE=1 SV=1	66	7	41	7	32.076	102.57	7	17.1	1.34701e+06	8.50838e+06	1.04853e+07	5.70699e+06	2.00972e+06	1.49841e+07	2.74779e+06	6.39577e+06	7.7606e+06	1.64051e+07	7.74654e+06	6	6	7	7	5	7	6	7	7	7	7	6	6	7	7	5	7	6	7	7	7	7
Q8K1L5	76497	Ppp1r11	FALSE	E3 ubiquitin-protein ligase PPP1R11 OS=Mus musculus OX=10090 GN=Ppp1r11 PE=1 SV=1	19	3	41	3	23.347	140.88	3	14.5	6.53711e+06	5.23527e+06	5.02668e+06	5.60423e+06	8.22737e+06	3.80086e+06	4.53426e+06	6.54266e+06	8.71357e+06	5.63957e+06	9.67667e+06	2	2	2	3	3	3	2	2	2	2	2	2	2	2	3	3	3	2	2	2	2	2
Q3UQN2	218503	Fcho2	FALSE	F-BAR domain only protein 2 OS=Mus musculus OX=10090 GN=Fcho2 PE=1 SV=1	11	7	41	7	21.983	85.73	7	88.7	1.25979e+06	3.6213e+06	2.89169e+06	2.07814e+06	1.7692e+06	3.48005e+06	2.36481e+06	3.147e+06	3.26076e+06	3.37903e+06	2.45428e+06	6	7	7	7	6	7	7	7	6	7	6	6	7	7	7	6	7	7	7	6	7	6
O35945	26358	Aldh1a7	TRUE	Aldehyde dehydrogenase, cytosolic 1 OS=Mus musculus OX=10090 GN=Aldh1a7 PE=1 SV=1	21	8	40	1	25.93	94.38	8	54.6	174025	214550	196730	181240	354684	282026	246481	256047	242983	272982	289993	7	7	8	7	7	7	7	6	6	8	7	7	7	8	7	7	7	7	6	6	8	7
Q64105	20751	Spr	TRUE	Sepiapterin reductase OS=Mus musculus OX=10090 GN=Spr PE=1 SV=1	33	6	40	6	27.344	110.61	6	27.9	160421	3.4394e+06	4.35245e+06	1.94977e+06	699516	5.35783e+06	580724	2.37228e+06	1.97723e+06	6.00002e+06	1.86237e+06	1	6	6	6	4	6	3	6	6	6	6	1	6	6	6	4	6	3	6	6	6	6
P34928	11812	Apoc1	FALSE	Apolipoprotein C-I OS=Mus musculus OX=10090 GN=Apoc1 PE=1 SV=1	25	4	40	4	16.489	93.56	4	9.7	3.59197e+07	4.22331e+07	3.39526e+07	5.52787e+07	1.12321e+08	3.46161e+07	1.94953e+07	5.27594e+07	2.76818e+07	2.25224e+07	5.83535e+07	4	3	4	4	4	4	4	4	4	4	4	4	3	4	4	4	4	4	4	4	4	4
Q8CDG3	70675	Vcpip1	FALSE	Deubiquitinating protein VCPIP1 OS=Mus musculus OX=10090 GN=Vcpip1 PE=1 SV=1	10	9	40	9	38.059	117.81	9	134.4	6.15102e+06	4.35913e+06	3.14654e+06	4.14549e+06	6.87758e+06	2.38405e+06	3.27491e+06	3.80044e+06	3.50908e+06	3.39893e+06	7.68832e+06	8	9	8	8	8	7	8	8	8	8	8	8	9	8	8	8	7	8	8	8	8	8
Q9WUU7	64138	Ctsz	FALSE	Cathepsin Z OS=Mus musculus OX=10090 GN=Ctsz PE=1 SV=1	13	4	40	4	17.923	94.03	4	34	6.28491e+06	9.74446e+06	1.19119e+07	1.00841e+07	7.08986e+06	1.96409e+07	1.21639e+07	1.54123e+07	2.34419e+07	3.13055e+07	1.7887e+07	4	4	4	4	4	4	4	4	4	4	4	4	4	4	4	4	4	4	4	4	4	4
Q920A5	74617	Scpep1	FALSE	Retinoid-inducible serine carboxypeptidase OS=Mus musculus OX=10090 GN=Scpep1 PE=1 SV=2	17	7	40	7	30.087	107.6	7	50.9	1.07824e+06	7.9577e+06	1.09251e+07	7.94454e+06	1.85745e+06	1.05091e+07	2.82629e+06	6.36076e+06	6.52957e+06	1.18121e+07	7.71771e+06	3	7	7	7	6	6	6	6	7	7	6	3	7	7	7	6	6	6	6	7	7	6
P63044	22318	Vamp2	FALSE	Vesicle-associated membrane protein 2 OS=Mus musculus OX=10090 GN=Vamp2 PE=1 SV=2	61	6	40	3	37.135	128.89	6	12.7	949094	605078	697713	427532	1.38606e+06	963980	1.33727e+06	1.13819e+06	1.2675e+06	1.09441e+06	971462	6	6	6	6	6	6	6	6	6	6	6	6	6	6	6	6	6	6	6	6	6	6
Q99LJ0	80281	Cttnbp2nl	FALSE	CTTNBP2 N-terminal-like protein OS=Mus musculus OX=10090 GN=Cttnbp2nl PE=1 SV=1	18	9	40	9	32.049	98.17	9	69.8	1.19802e+06	1.21904e+06	1.26837e+06	1.42211e+06	1.4953e+06	1.3494e+06	1.5982e+06	1.47053e+06	3.1653e+06	1.88551e+06	2.86785e+06	6	7	6	7	7	7	8	7	7	7	8	6	7	6	7	7	7	8	7	7	7	8
Q9DBT9	74129	Dmgdh	TRUE	Dimethylglycine dehydrogenase, mitochondrial OS=Mus musculus OX=10090 GN=Dmgdh PE=1 SV=1	10	5	40	5	25.161	137.53	5	97.2	1.66703e+06	2.59216e+06	1.99613e+06	2.70686e+06	2.48282e+06	3.42445e+06	3.92525e+06	6.80046e+06	6.74292e+06	8.8312e+06	5.25628e+06	3	5	4	3	4	3	5	5	4	5	5	3	5	4	3	4	3	5	5	4	5	5
P81269	11908	Atf1	FALSE	Cyclic AMP-dependent transcription factor ATF-1 OS=Mus musculus OX=10090 GN=Atf1 PE=1 SV=1	18	4	40	2	13.891	102.27	4	29.2	1813253	1.2366e+06	1.11096e+06	1147174	2.32111e+06	645517	1.19321e+06	1.13176e+06	1.78267e+06	1.04651e+06	2.12192e+06	4	4	4	4	4	4	4	4	4	4	4	4	4	4	4	4	4	4	4	4	4	4
Q08288	17089	Lyar	FALSE	Cell growth-regulating nucleolar protein OS=Mus musculus OX=10090 GN=Lyar PE=1 SV=2	15	5	40	5	21.299	128.01	5	43.7	474284	781889	576522	549527	844103	1.02496e+06	713832	1.03452e+06	1.72204e+06	1.2778e+06	911149	5	4	4	4	4	5	4	5	5	5	4	5	4	4	4	4	5	4	5	5	5	4
P50431	20425	Shmt1	FALSE	Serine hydroxymethyltransferase, cytosolic OS=Mus musculus OX=10090 GN=Shmt1 PE=1 SV=3	22	9	40	9	34.7	112.54	9	52.6	1.97287e+06	4.56159e+06	5.09264e+06	5.07752e+06	4.43679e+06	2.30222e+06	3.27742e+06	3.86586e+06	8.84898e+06	3.86704e+06	4.12106e+06	6	8	9	7	7	4	7	6	3	6	7	6	8	9	7	7	4	7	6	3	6	7
P61961	67890	Ufm1	FALSE	Ubiquitin-fold modifier 1 OS=Mus musculus OX=10090 GN=Ufm1 PE=1 SV=1	68	4	40	4	12.931	105.72	4	9.1	9.23829e+06	9.9048e+06	10280758	10229084	16078515	1.01337e+07	7.13716e+06	1.00218e+07	1.29998e+07	8.0742e+06	1.06283e+07	4	4	4	4	4	4	4	4	4	4	4	4	4	4	4	4	4	4	4	4	4	4
P68368	22145	Tuba4a	FALSE	Tubulin alpha-4A chain OS=Mus musculus OX=10090 GN=Tuba4a PE=1 SV=1	23	7	40	3	26.699	117.58	7	49.9	3.93379e+06	6.04056e+06	2.8102e+06	3.98759e+06	2.57646e+06	4.99822e+06	4.89635e+06	4.66196e+06	243518	7.69074e+06	5889401	4	5	7	3	3	5	5	4	4	4	4	4	5	7	3	3	5	5	4	4	4	4
Q6NXI6	75137	Rprd2	FALSE	Regulation of nuclear pre-mRNA domain-containing protein 2 OS=Mus musculus OX=10090 GN=Rprd2 PE=1 SV=1	10	8	39	8	33.116	118.6	8	156.5	3.16811e+06	2.35144e+06	2.31587e+06	2.5585e+06	3.38236e+06	669873	1.59983e+06	2.43456e+06	2.24396e+06	1.44112e+06	2.93684e+06	7	7	8	7	8	5	6	8	5	6	6	7	7	8	7	8	5	6	8	5	6	6
Q8BVI5	228960	Stx16	FALSE	Syntaxin-16 OS=Mus musculus OX=10090 GN=Stx16 PE=1 SV=3	44	9	39	9	37.087	136.56	9	37.1	1.18413e+06	2.93656e+06	3.51115e+06	2.38203e+06	1.98955e+06	3.52622e+06	1.77956e+06	1.79633e+06	2.44246e+06	2.60103e+06	2.32683e+06	4	6	6	7	6	7	5	6	5	6	5	4	6	6	7	6	7	5	6	5	6	5
Q91X83	11720	Mat1a	FALSE	S-adenosylmethionine synthase isoform type-1 OS=Mus musculus OX=10090 GN=Mat1a PE=1 SV=1	20	7	39	7	24.289	98.23	7	43.5	2.14254e+06	6.84962e+06	9453260	4.78605e+06	3.2817e+06	1.98383e+06	1.51764e+06	2.86134e+06	2.7686e+06	3.86462e+06	3.1236e+06	6	7	7	6	4	6	5	6	6	6	6	6	7	7	6	4	6	5	6	6	6	6
Q61768	16573	Kif5b	FALSE	Kinesin-1 heavy chain OS=Mus musculus OX=10090 GN=Kif5b PE=1 SV=3	7	5	39	5	18.775	110.88	5	109.5	1.9069e+06	1.30767e+06	1.19181e+06	1.03855e+06	2.08436e+06	830180	1.64828e+06	1.34029e+06	2.10603e+06	1.61614e+06	2.09249e+06	5	5	5	5	5	4	5	5	5	5	5	5	5	5	5	5	4	5	5	5	5	5
Q8JZQ2	69597	Afg3l2	TRUE	AFG3-like protein 2 OS=Mus musculus OX=10090 GN=Afg3l2 PE=1 SV=1	10	8	39	8	32.047	108.26	8	89.5	1.00969e+06	1.201e+06	934673	1.13578e+06	1.47862e+06	3.18702e+06	2.54859e+06	3.3558e+06	3.8616e+06	3.94105e+06	2.16289e+06	5	5	4	5	5	6	7	6	8	6	6	5	5	4	5	5	6	7	6	8	6	6
Q07813	12028	Bax	TRUE	Apoptosis regulator BAX OS=Mus musculus OX=10090 GN=Bax PE=1 SV=1	30	4	39	4	30.579	118.04	4	21.4	431767	2.82255e+06	1.57259e+06	1.28683e+06	678008	5.86907e+06	3.44362e+06	3.65844e+06	8.54773e+06	8.53117e+06	3.58215e+06	3	4	3	4	3	4	4	4	4	4	4	3	4	3	4	3	4	4	4	4	4	4
P47915	19944	Rpl29	FALSE	60S ribosomal protein L29 OS=Mus musculus OX=10090 GN=Rpl29 PE=1 SV=2	23	4	39	4	12.231	87.89	4	17.6	1.35547e+07	4.70336e+07	3.96507e+07	4.08889e+07	2.80674e+07	3.1068e+07	2.55365e+07	5.17012e+07	7.7538e+07	4.86388e+07	4.69339e+07	4	4	4	4	4	4	4	4	4	4	4	4	4	4	4	4	4	4	4	4	4	4
P04441	16149	Cd74	FALSE	H-2 class II histocompatibility antigen gamma chain OS=Mus musculus OX=10090 GN=Cd74 PE=1 SV=3	23	6	39	6	25.841	115.04	6	31.5	2.46923e+06	3.89598e+06	3.557e+06	4.00279e+06	2.18587e+06	4.70861e+06	1.99777e+06	2.14471e+06	6.11747e+06	5.36624e+06	9.43712e+06	6	4	4	5	4	5	4	3	6	5	5	6	4	4	5	4	5	4	3	6	5	5
P50544	11370	Acadvl	TRUE	Very long-chain specific acyl-CoA dehydrogenase, mitochondrial OS=Mus musculus OX=10090 GN=Acadvl PE=1 SV=3	18	7	39	7	27.108	110.41	7	70.8	2.10181e+06	2.38009e+06	2.3463e+06	3350583	2.96297e+06	3.63646e+06	5.00028e+06	5.93432e+06	1.28979e+07	1.26488e+07	6.03077e+06	4	6	4	5	4	5	5	5	6	7	5	4	6	4	5	4	5	5	5	6	7	5
Q62095	26900	Ddx3y	FALSE	ATP-dependent RNA helicase DDX3Y OS=Mus musculus OX=10090 GN=Ddx3y PE=1 SV=2	14	6	39	2	27.588	79.68	6	73.4	1.95234e+06				2.38705e+06	559242	1.90303e+06	1.78865e+06				5	4	4	4	6	5	5	5	4	4	4	5	4	4	4	6	5	5	5	4	4	4
Q64511	21974	Top2b	FALSE	DNA topoisomerase 2-beta OS=Mus musculus OX=10090 GN=Top2b PE=1 SV=2	8	8	39	8	30.235	106.94	8	181.8	1.173e+06	1180392	820623	1.18642e+06	1.37523e+06	712543	527587	844668	1.24259e+06	1.13005e+06	1.6643e+06	6	5	4	5	5	5	3	6	4	4	5	6	5	4	5	5	5	3	6	4	4	5
Q5SXY1	432572	Specc1	FALSE	Cytospin-B OS=Mus musculus OX=10090 GN=Specc1 PE=1 SV=2	12	10	39	10	35.635	100.42	10	118	668186	954249	1.15655e+06	1.45896e+06	1.12823e+06	1.7724e+06	1.87622e+06	1.48527e+06	4.30818e+06	2.99445e+06	2.58285e+06	7	7	6	7	7	6	7	6	8	8	8	7	7	6	7	7	6	7	6	8	8	8
Q8K0R6	216871	Gltpd2	FALSE	Glycolipid transfer protein domain-containing protein 2 OS=Mus musculus OX=10090 GN=Gltpd2 PE=1 SV=1	27	6	39	6	19.89	103.72	6	34.4	2.08165e+06	4.42299e+06	5.42252e+06	4.59905e+06	3.13185e+06	3.457e+06	2.83723e+06	3.27413e+06	3.36717e+06	2.75933e+06	5.05564e+06	6	6	6	6	6	6	6	6	5	6	6	6	6	6	6	6	6	6	6	5	6	6
P62702	20102	Rps4x	FALSE	40S ribosomal protein S4, X isoform OS=Mus musculus OX=10090 GN=Rps4x PE=1 SV=2	19	5	39	5	15.465	97.07	5	29.6	5.45839e+06	6.03126e+06	6.4532e+06	5.9477e+06	9.04229e+06	7.16639e+06	6.55249e+06	6.86969e+06	1.05588e+07	7.45467e+06	8.16055e+06	4	5	5	5	5	5	5	5	5	5	5	4	5	5	5	5	5	5	5	5	5	5
Q9DBF1	110695	Aldh7a1	TRUE	Alpha-aminoadipic semialdehyde dehydrogenase OS=Mus musculus OX=10090 GN=Aldh7a1 PE=1 SV=4	17	7	39	7	24.651	102.84	7	58.8	1.38109e+06	1.72144e+06	1.97591e+06	1.52624e+06	2.1738e+06	2.22843e+06	1.96461e+06	3.06021e+06	3018603	2.42162e+06	2.07101e+06	6	7	7	6	6	7	7	6	5	6	5	6	7	7	6	6	7	7	6	5	6	5
Q99KI0	11429	Aco2	TRUE	Aconitate hydratase, mitochondrial OS=Mus musculus OX=10090 GN=Aco2 PE=1 SV=1	18	13	39	13	45.864	94.87	13	85.4	533247	2.38818e+06	2.44734e+06	975773	573928	6.26092e+06	3.17904e+06	4.38065e+06	6.95985e+06	1.64067e+07	4.91924e+06	5	9	9	7	3	11	10	10	12	12	11	5	9	9	7	3	11	10	10	12	12	11
Q61301	12386	Ctnna2	FALSE	Catenin alpha-2 OS=Mus musculus OX=10090 GN=Ctnna2 PE=1 SV=3	11	9	39	1	31.28	102.46	9	105.2		2219559	1.8288e+06	623512	348753	1.33707e+06		2.26555e+06	993399	1.41753e+06		4	9	9	9	6	9	7	9	8	9	8	4	9	9	9	6	9	7	9	8	9	8
P45952	11364	Acadm	TRUE	Medium-chain specific acyl-CoA dehydrogenase, mitochondrial OS=Mus musculus OX=10090 GN=Acadm PE=1 SV=1	13	5	38	5	16.869	108.26	5	46.5	2.42506e+06	3.07854e+06	3.7339e+06	3.57712e+06	4.41673e+06	5.90057e+06	5.92097e+06	7.41965e+06	1.43884e+07	1.3545e+07	7.14525e+06	3	4	5	4	4	4	4	5	5	5	5	3	4	5	4	4	4	4	5	5	5	5
Q60739	12017	Bag1	FALSE	BAG family molecular chaperone regulator 1 OS=Mus musculus OX=10090 GN=Bag1 PE=1 SV=3	28	7	38	7	30.419	103.79	7	39.7	422364	3.02475e+06	3.3362e+06	2.88242e+06	781139	5.84783e+06	1.86719e+06	2.61645e+06	5.41612e+06	5.26661e+06	3.79798e+06	3	7	7	7	4	7	6	7	7	7	7	3	7	7	7	4	7	6	7	7	7	7
Q9QUI0	11848	Rhoa	FALSE	Transforming protein RhoA OS=Mus musculus OX=10090 GN=Rhoa PE=1 SV=1	30	5	38	5	26.213	89	5	21.8	1.3497e+06	2.56408e+06	2.50849e+06	2.00177e+06	1.60567e+06	3.36145e+06	2.04413e+06	2.5188e+06	2.94573e+06	4.01173e+06	2.45892e+06	3	4	4	4	4	5	3	4	4	4	4	3	4	4	4	4	5	3	4	4	4	4
P11609	12479	Cd1d1	FALSE	Antigen-presenting glycoprotein CD1d1 OS=Mus musculus OX=10090 GN=Cd1d1 PE=1 SV=3	23	6	38	6	27.803	87.8	6	38.5	571571	1.30515e+07	1.52968e+07	1.35622e+07	1.70579e+06	5.14702e+06	1.43818e+06	2.09567e+06	4.95201e+06	7.61949e+06	9.71443e+06	3	6	6	6	4	6	5	3	5	5	6	3	6	6	6	4	6	5	3	5	5	6
Q8C5P7	72148	Tdrp	FALSE	Testis development-related protein OS=Mus musculus OX=10090 GN=Tdrp PE=1 SV=1	48	6	38	6	27.909	98.83	6	20.2	3.20084e+06	3.06094e+06	2.78309e+06	3.34584e+06	5.2556e+06	1.64009e+06	3.38346e+06	3.1817e+06	6.76518e+06	3.30142e+06	5.11814e+06	5	5	5	5	6	4	5	5	5	5	5	5	5	5	5	6	4	5	5	5	5	5
Q9QYY0	14388	Gab1	FALSE	GRB2-associated-binding protein 1 OS=Mus musculus OX=10090 GN=Gab1 PE=1 SV=2	19	9	38	9	31.167	98.35	9	76.8	2.47973e+06	2.15025e+06	2.57996e+06	2.38119e+06	2.65164e+06	921352	1.43957e+06	1.47503e+06	2.30605e+06	1.87052e+06	2.89007e+06	7	7	7	8	7	4	7	7	7	7	8	7	7	7	8	7	4	7	7	7	7	8
Q7M6Y3	233489	Picalm	FALSE	Phosphatidylinositol-binding clathrin assembly protein OS=Mus musculus OX=10090 GN=Picalm PE=1 SV=1	16	7	38	7	26.943	125.52	7	71.5	4.10286e+06	3.31781e+06	2.94917e+06	3.81367e+06	4.95945e+06	2.18373e+06	3.00155e+06	4.22419e+06	6147709	3.78924e+06	7.08986e+06	7	7	7	7	7	5	7	7	7	6	7	7	7	7	7	7	5	7	7	7	6	7
Q99JB2	66592	Stoml2	TRUE	Stomatin-like protein 2, mitochondrial OS=Mus musculus OX=10090 GN=Stoml2 PE=1 SV=1	39	8	38	8	40.357	121.06	8	38.4	502829	728988	1.17536e+06	616692	747083	3.96161e+06	1.54518e+06	2.37456e+06	3.43679e+06	6022388	1.76947e+06	3	4	5	3	3	7	5	6	6	8	5	3	4	5	3	3	7	5	6	6	8	5
Q2VLH6	93671	Cd163	FALSE	Scavenger receptor cysteine-rich type 1 protein M130 OS=Mus musculus OX=10090 GN=Cd163 PE=1 SV=2	11	11	38	11	43.743	93.22	11	120.8	689495	2.84216e+06	2.63999e+06	4.04436e+06	959453	3.1288e+06	1.24533e+06	1.38401e+06	921708	2.86234e+06	2.21943e+06	5	8	7	10	5	8	7	6	5	7	7	5	8	7	10	5	8	7	6	5	7	7
O54824	16170	Il16	FALSE	Pro-interleukin-16 OS=Mus musculus OX=10090 GN=Il16 PE=1 SV=3	8	8	38	8	30.347	101.44	8	141.3	3.61821e+06	3.76149e+06	2.68344e+06	2.93903e+06	3.2615e+06	2.0496e+06	2.62876e+06	2.96272e+06	4.94917e+06	4.4028e+06	5.88514e+06	6	7	7	7	7	6	7	7	7	7	7	6	7	7	7	7	6	7	7	7	7	7
Q3UGS4	192173	Mcrip1	FALSE	Mapk-regulated corepressor-interacting protein 1 OS=Mus musculus OX=10090 GN=Mcrip1 PE=1 SV=1	51	5	38	5	19.121	101.56	5	11.1	6.07289e+06	4.52298e+06	4.11843e+06	6.20769e+06	8.10234e+06	4.26009e+06	6.35271e+06	6.5062e+06	9.75142e+06	6.563e+06	8.2772e+06	5	5	5	5	5	5	5	5	5	5	5	5	5	5	5	5	5	5	5	5	5	5
P56376	66204	Acyp1	FALSE	Acylphosphatase-1 OS=Mus musculus OX=10090 GN=Acyp1 PE=1 SV=2	64	6	38	6	18.68	98.49	6	11.2	1.60534e+06	3.80459e+06	3.85642e+06	3.78496e+06	2.92307e+06	4.96944e+06	2.13189e+06	3.07322e+06	6.03153e+06	6.07121e+06	4.33557e+06	6	5	5	6	6	6	5	5	6	6	6	6	5	5	6	6	6	5	5	6	6	6
Q8VHR5	229542	Gatad2b	FALSE	Transcriptional repressor p66-beta OS=Mus musculus OX=10090 GN=Gatad2b PE=1 SV=1	12	5	38	5	22.933	114.22	5	65.4	2.35876e+06	1.78968e+06	1.53015e+06	1.97577e+06	2.34908e+06	1.36634e+06	1.53017e+06	1.7518e+06	1.98243e+06	1.75362e+06	2.66991e+06	5	5	5	5	4	5	4	5	5	5	5	5	5	5	5	4	5	4	5	5	5	5
Q9D6Y7	110265	Msra	TRUE	Mitochondrial peptide methionine sulfoxide reductase OS=Mus musculus OX=10090 GN=Msra PE=1 SV=1	30	5	38	5	29.034	95.69	5	26	1.76229e+06	2167066	2556553	2.42865e+06	1.86025e+06	2.86456e+06	2.98265e+06	3.6393e+06	4.8399e+06	5.8336e+06	4.16053e+06	5	5	4	5	5	4	5	5	5	5	5	5	5	4	5	5	4	5	5	5	5	5
Q9D1M7	66120	Fkbp11	FALSE	Peptidyl-prolyl cis-trans isomerase FKBP11 OS=Mus musculus OX=10090 GN=Fkbp11 PE=1 SV=1	26	6	38	6	24.8	107.53	6	22.1	5.59291e+06	3.74086e+06	3.76743e+06	2.74303e+06	8.01828e+06	1.0494e+07	1.02226e+07	1.28493e+07	1.36086e+07	1.02507e+07	7.26641e+06	6	6	6	4	4	6	6	6	6	6	6	6	6	6	4	4	6	6	6	6	6	6
Q8BTM8	192176	Flna	FALSE	Filamin-A OS=Mus musculus OX=10090 GN=Flna PE=1 SV=5	11	18	38	18	69.417	112.64	18	281	740266	405993	1.26796e+06	1.9398e+06	513787	5.2877e+06	1.3066e+06	1.24444e+06	3.4384e+06	2.52984e+06	2.88286e+06	7	4	10	12	4	17	9	8	10	10	10	7	4	10	12	4	17	9	8	10	10	10
Q9Z0M5	16889	Lipa	FALSE	Lysosomal acid lipase/cholesteryl ester hydrolase OS=Mus musculus OX=10090 GN=Lipa PE=1 SV=2	10	2	38	2	18.576	134.16	2	45.3	1.35706e+07	1.21829e+07	1.93994e+07	2.30774e+07	4.60454e+07	6.94235e+06	6.6718e+06	1.04928e+07	1.02045e+07	9.53973e+06	8.62709e+06	2	2	2	2	2	2	2	2	2	2	2	2	2	2	2	2	2	2	2	2	2	2
Q9D0V7	55960	Ebag9	FALSE	Receptor-binding cancer antigen expressed on SiSo cells OS=Mus musculus OX=10090 GN=Ebag9 PE=1 SV=2	21	4	38	4	16.946	111.83	4	24.3	2.79837e+06	3.24794e+06	3.75267e+06	3.87417e+06	5.78755e+06	2.19318e+06	3.29863e+06	3.30036e+06	4.97853e+06	2.45721e+06	6.62298e+06	3	4	4	4	4	3	4	4	4	4	4	3	4	4	4	4	3	4	4	4	4	4
P61759	22327	Vbp1	FALSE	Prefoldin subunit 3 OS=Mus musculus OX=10090 GN=Vbp1 PE=1 SV=2	26	5	37	5	16.793	86.05	5	22.4	345121	1.8171e+06	1.86728e+06	1.39345e+06	898355	2.71369e+06	925200	1.74341e+06	2.95634e+06	2.83867e+06	2.4461e+06	3	5	5	4	4	5	4	5	4	5	5	3	5	5	4	4	5	4	5	4	5	5
P22361	21405	Hnf1a	FALSE	Hepatocyte nuclear factor 1-alpha OS=Mus musculus OX=10090 GN=Hnf1a PE=1 SV=2	20	7	37	7	34.082	132.87	7	67.2	1.58558e+06	2.31033e+06	2.75668e+06	2.1101e+06	1.84766e+06	1.10314e+06	892601	1.84122e+06	1.24282e+06	399515	2.02383e+06	6	7	7	7	6	6	5	5	3	2	4	6	7	7	7	6	6	5	5	3	2	4
Q9JKX4	56321	Aatf	FALSE	Protein AATF OS=Mus musculus OX=10090 GN=Aatf PE=1 SV=1	27	10	37	10	43.654	110.27	10	59.4	1.69137e+06	1.1506e+06	1.1289e+06	1.4142e+06	1.77321e+06	2.17837e+06	3.31171e+06	2.55371e+06	8.31249e+06	3.99234e+06	3.76824e+06	7	6	5	4	6	5	7	7	10	8	7	7	6	5	4	6	5	7	7	10	8	7
Q99KB8	14651	Hagh	TRUE	Hydroxyacylglutathione hydrolase, mitochondrial OS=Mus musculus OX=10090 GN=Hagh PE=1 SV=2	12	3	37	3	24.703	100.44	3	34.1	3.33931e+06	3.46336e+06	3.72011e+06	3.64772e+06	5.34112e+06	3.04003e+06	4.04435e+06	4.76003e+06	5.01623e+06	4.56213e+06	5.57347e+06	3	3	3	3	3	3	3	3	3	3	3	3	3	3	3	3	3	3	3	3	3	3
P47962	100503670	Rpl5	FALSE	60S ribosomal protein L5 OS=Mus musculus OX=10090 GN=Rpl5 PE=1 SV=3	16	5	37	5	25.402	81.78	5	34.4	1.48833e+07	1.2215e+07	1.20645e+07	1.20946e+07	1.74449e+07	7.00757e+06	1.25879e+07	1.38723e+07	2.45413e+07	1.40148e+07	1.8775e+07	5	5	5	5	5	5	5	5	5	5	5	5	5	5	5	5	5	5	5	5	5	5
Q8VDJ3	110611	Hdlbp	FALSE	Vigilin OS=Mus musculus OX=10090 GN=Hdlbp PE=1 SV=1	8	7	37	7	26.884	121.69	7	141.7	4.34982e+06	3.51118e+06	3.22384e+06	4.54642e+06	5.59534e+06	2.59512e+06	2.69048e+06	3.0881e+06	3.89455e+06	3.8108e+06	4.93007e+06	7	7	7	6	6	7	6	5	5	7	5	7	7	7	6	6	7	6	5	5	7	5
Q8VDY9	67770	Caap1	FALSE	Caspase activity and apoptosis inhibitor 1 OS=Mus musculus OX=10090 GN=Caap1 PE=1 SV=2	13	4	37	4	13.189	95.71	4	37.8	2.27023e+06	2.08078e+06	2.01851e+06	2.19682e+06	2.27767e+06	1.63798e+06	1.63119e+06	1705402	4.29032e+06	2.3583e+06	2.59507e+06	4	4	4	4	3	4	3	4	4	4	4	4	4	4	4	3	4	3	4	4	4	4
P62900	114641	Rpl31	FALSE	60S ribosomal protein L31 OS=Mus musculus OX=10090 GN=Rpl31 PE=1 SV=1	34	6	37	6	18.192	92.12	6	14.5	6.40061e+06	1.15969e+07	1.19564e+07	1.21408e+07	1.15506e+07	9.07473e+06	8.26641e+06	9.56374e+06	1.68492e+07	17668988	1.62942e+07	4	4	3	5	5	5	3	5	5	3	4	4	4	3	5	5	5	3	5	5	3	4
Q6NVF9	432508	Cpsf6	FALSE	Cleavage and polyadenylation specificity factor subunit 6 OS=Mus musculus OX=10090 GN=Cpsf6 PE=1 SV=1	11	4	37	4	29.281	105.94	4	59.1	6.16474e+06	5.71901e+06	3.5484e+06	4.47537e+06	5.56735e+06	3.7481e+06	5.05121e+06	5.13561e+06	7.79143e+06	6.1183e+06	9.37063e+06	4	4	3	4	4	4	4	4	4	4	4	4	4	3	4	4	4	4	4	4	4	4
Q61081	12539	Cdc37	FALSE	Hsp90 co-chaperone Cdc37 OS=Mus musculus OX=10090 GN=Cdc37 PE=1 SV=1	17	6	37	6	21.863	113	6	44.6	2.07065e+06	1.59899e+06	1.66268e+06	1.57024e+06	1.90514e+06	1.50399e+06	1.53387e+06	1.57101e+06	1.85603e+06	2.58446e+06	3.01142e+06	6	6	6	6	6	5	6	5	5	5	5	6	6	6	6	6	5	6	5	5	5	5
Q9CQ62	67460	Decr1	TRUE	2,4-dienoyl-CoA reductase [(3E)-enoyl-CoA-producing], mitochondrial OS=Mus musculus OX=10090 GN=Decr1 PE=1 SV=1	31	8	37	8	36.236	100.83	8	36.2	1.8578e+06	3.35273e+06	3.55259e+06	1.67445e+06	2.39682e+06	6.34619e+06	5.96728e+06	9.1746e+06	1.17718e+07	13311404	4.97272e+06	7	7	7	5	7	8	8	8	8	8	6	7	7	7	5	7	8	8	8	8	8	6
P62311	67678	Lsm3	FALSE	U6 snRNA-associated Sm-like protein LSm3 OS=Mus musculus OX=10090 GN=Lsm3 PE=1 SV=2	41	3	37	3	14.075	68.93	3	11.8	1.98648e+06	6.37165e+06	6384142	8.9041e+06	3.91069e+06	7.97848e+06	5.21619e+06	5.82808e+06	1.42457e+07	1.23411e+07	1.07862e+07	2	3	3	3	3	3	2	3	3	3	3	2	3	3	3	3	3	2	3	3	3	3
Q99JY3	107526	Gimap4	FALSE	GTPase IMAP family member 4 OS=Mus musculus OX=10090 GN=Gimap4 PE=1 SV=2	38	9	37	9	32.377	97.91	9	38		5.93476e+06	6.42833e+06	2.16511e+06		7.27177e+06	524584	2.60744e+06	2213572	1.16755e+07	2.17412e+06	0	9	9	6	1	7	3	6	3	9	4	0	9	9	6	1	7	3	6	3	9	4
Q9CZH7	67622	Mxra7	FALSE	Matrix-remodeling-associated protein 7 OS=Mus musculus OX=10090 GN=Mxra7 PE=1 SV=2	33	5	37	5	17.342	87	5	19.4	3.26861e+06	3.28777e+06	3.59265e+06	3.96403e+06	4.63337e+06	5.24268e+06	5.32643e+06	4.47562e+06	4.96353e+06	3.81616e+06	6.45875e+06	5	5	5	5	5	5	5	5	4	5	5	5	5	5	5	5	5	5	5	4	5	5
P61957	170930	Sumo2	FALSE	Small ubiquitin-related modifier 2 OS=Mus musculus OX=10090 GN=Sumo2 PE=1 SV=1	27	3	37	2	11.201	111.63	3	10.9	3.2872e+06	2.45365e+06	2.4463e+06	3113872	3.72528e+06	2.53784e+06	3.47503e+06	2.92021e+06	8.46469e+06	3563055	6.14078e+06	3	3	3	3	3	3	3	3	3	3	3	3	3	3	3	3	3	3	3	3	3	3
Q9CQF4	67851	Mtres1	TRUE	Mitochondrial transcription rescue factor 1 OS=Mus musculus OX=10090 GN=Mtres1 PE=1 SV=1	33	8	37	8	33.959	103.37	8	27.8	768020	2.23859e+06	2.35458e+06	1.53302e+06	1.25902e+06	8.11153e+06	5.77054e+06	1.12076e+07	1.14185e+07	1.30098e+07	5.64699e+06	4	5	5	4	3	5	6	6	7	8	6	4	5	5	4	3	5	6	6	7	8	6
Q8BGT7	76479	Smndc1	FALSE	Survival of motor neuron-related-splicing factor 30 OS=Mus musculus OX=10090 GN=Smndc1 PE=1 SV=1	42	6	37	6	23.574	114.02	6	26.7	4.96101e+06	4.52039e+06	4.37211e+06	5.69452e+06	6.71413e+06	3.87315e+06	6.56244e+06	5.33964e+06	1.06071e+07	6.87226e+06	8.63481e+06	6	5	6	6	5	6	5	6	6	6	6	6	5	6	6	5	6	5	6	6	6	6
P03930	17706	mt-Atp8	TRUE	ATP synthase protein 8 OS=Mus musculus OX=10090 GN=Mtatp8 PE=1 SV=1	46	3	37	3	9.797	117.26	3	7.8	2.61059e+07	3.1469e+07	2.97459e+07	3.00196e+07	3.82504e+07	7.51481e+07	6.62919e+07	9.46694e+07	7.53764e+07	9.58684e+07	6.03771e+07	3	3	3	3	3	3	3	3	3	3	3	3	3	3	3	3	3	3	3	3	3	3
P23506	18537	Pcmt1	FALSE	Protein-L-isoaspartate(D-aspartate) O-methyltransferase OS=Mus musculus OX=10090 GN=Pcmt1 PE=1 SV=3	41	6	37	6	31.421	101.8	6	24.6	283128	2.46851e+06	1.69351e+06	1.4265e+06	789785	4.35993e+06	1.07687e+06	2.05682e+06	3.06304e+06	4.60864e+06	2.73679e+06	3	6	5	6	4	5	6	5	5	5	5	3	6	5	6	4	5	6	5	5	5	5
Q8R0T6	54672	Adgrg3	FALSE	Adhesion G protein-coupled receptor G3 OS=Mus musculus OX=10090 GN=Adgrg3 PE=2 SV=3	13	5	37	5	26.172	113.23	5	60	2.24662e+06	1.80062e+06	1.74432e+06	2.25567e+06	2.94501e+06	2.58526e+06	2.19381e+06	2.35141e+06	6538062	3.75203e+06	4.28548e+06	5	3	3	5	4	4	4	4	5	5	5	5	3	3	5	4	4	4	4	5	5	5
Q8VEK0	69981	Tmem30a	FALSE	Cell cycle control protein 50A OS=Mus musculus OX=10090 GN=Tmem30a PE=1 SV=1	22	9	36	9	38.892	94.17	9	41	2.00763e+06	9.90272e+06	1.15717e+07	9.32267e+06	4.55555e+06	7.25584e+06	2.09983e+06	5.99215e+06	5.34902e+06	4.82671e+06	6.35602e+06	6	9	9	9	8	9	7	9	8	8	7	6	9	9	9	8	9	7	9	8	8	7
P63166	22218	Sumo1	FALSE	Small ubiquitin-related modifier 1 OS=Mus musculus OX=10090 GN=Sumo1 PE=1 SV=1	52	5	36	5	18.614	88.65	5	11.6	3.81247e+06	4.78786e+06	4.44644e+06	4.4438e+06	4.79285e+06	4.3275e+06	3.98054e+06	4.26434e+06	7.63658e+06	5.99932e+06	8.21486e+06	5	5	5	5	5	5	5	5	5	5	5	5	5	5	5	5	5	5	5	5	5	5
Q8BVU5	74167	Nudt9	TRUE	ADP-ribose pyrophosphatase, mitochondrial OS=Mus musculus OX=10090 GN=Nudt9 PE=1 SV=1	23	7	36	7	35.347	101.36	7	38.6	448937	3.51892e+06	3.98055e+06	2.62829e+06	1.3382e+06	5.84439e+06	3.24577e+06	4.5407e+06	8.17716e+06	8.7098e+06	6.22159e+06	4	7	7	7	7	7	7	7	7	7	7	4	7	7	7	7	7	7	7	7	7	7
Q9EQ20	104776	Aldh6a1	TRUE	Methylmalonate-semialdehyde dehydrogenase [acylating], mitochondrial OS=Mus musculus OX=10090 GN=Aldh6a1 PE=1 SV=1	22	9	36	9	32.468	105.94	9	57.9	928842	3.21128e+06	4.01381e+06	2.08492e+06	2.09699e+06	5.15983e+06	1.64536e+06	5.09472e+06	5.80962e+06	9.21107e+06	2.8836e+06	4	6	7	5	3	8	3	6	7	9	4	4	6	7	5	3	8	3	6	7	9	4
Q8JZQ9	27979	Eif3b	FALSE	Eukaryotic translation initiation factor 3 subunit B OS=Mus musculus OX=10090 GN=Eif3b PE=1 SV=1	14	6	36	6	25.765	107.63	6	91.3	1.24674e+06	850406	1.18852e+06	1.24132e+06	1.67213e+06	1.50033e+06	999686	1.38441e+06	2.94475e+06	2.2427e+06	2.00472e+06	6	4	5	5	5	6	5	5	6	6	5	6	4	5	5	5	6	5	5	6	6	5
E9Q7D5	54324	Arhgef5	FALSE	Rho guanine nucleotide exchange factor 5 OS=Mus musculus OX=10090 GN=Arhgef5 PE=1 SV=1	6	8	36	8	29.683	99.47	8	176.6	1.43758e+06	1.27591e+06	1.56164e+06	1.12067e+06	1.28225e+06	1.27375e+06	1.35573e+06	1.51118e+06	2.21877e+06	2.15949e+06	2.13501e+06	7	6	5	5	8	6	7	5	5	5	5	7	6	5	5	8	6	7	5	5	5	5
Q91W18	219249	Tdrd3	FALSE	Tudor domain-containing protein 3 OS=Mus musculus OX=10090 GN=Tdrd3 PE=1 SV=4	15	8	36	8	25.878	89.32	8	82.2	2.18683e+06	1.74905e+06	1.24031e+06	1.53196e+06	2.34109e+06	638915	1.82869e+06	1.69012e+06	1.83697e+06	1.84356e+06	2.40122e+06	8	8	7	8	8	4	8	8	7	8	8	8	8	7	8	8	4	8	8	7	8	8
Q8BMJ3	66235	Eif1ax	FALSE	Eukaryotic translation initiation factor 1A, X-chromosomal OS=Mus musculus OX=10090 GN=Eif1ax PE=2 SV=3	69	7	36	2	22.527	87.96	7	16.5	2.57896e+06	4.70842e+06	4.79467e+06	5.23695e+06	3.8023e+06	5.11506e+06	3.754e+06	3.84857e+06	8.79883e+06	6.8916e+06	5.9951e+06	5	6	6	6	6	6	5	5	6	6	7	5	6	6	6	6	6	5	5	6	6	7
P28665	17836	Mug1	FALSE	Murinoglobulin-1 OS=Mus musculus OX=10090 GN=Mug1 PE=1 SV=3	8	9	36	9	31.606	99.14	9	165.2	5.01506e+06	3.40681e+06	3.08957e+06	4.65632e+06	7.55088e+06	2.54679e+06	1.84017e+06	2.39244e+06	1.34139e+06	1.35096e+06	2.09284e+06	9	7	7	6	7	8	7	6	4	5	6	9	7	7	6	7	8	7	6	4	5	6
[truncated: 1,424 more rows]

## Sheet: WCL Proteomics Cox10 stats
UniprotKB Accession	EntrezID	GeneName	MitoCarta3.0	Description	Log2(Fold Change)	-LOG10(p-value)
P02088	15129	Hbb-b1	FALSE	Hemoglobin subunit beta-1 OS=Mus musculus OX=10090 GN=Hbb-b1 PE=1 SV=2	0.0925377	0.0937208
[truncated: 2,653 more rows]

## Sheet: WCL Proteomics Cox10 sig
Upregulated in cox10-/-					cox10-/- vs. cox10f/f
[truncated: 536 more rows]

[truncated: 15 more sheets: WCL Proteomics Cox10 oxphos, GO Cox10 ALL up, GO Cox10 mito up, GO Cox10 nonmito up, GO Cox10 ALL down, GO Cox10 mito down, GO Cox10 nonmito down, Mito Proteomics Cox10 data, Mito Proteomics Cox10 stats, MitoProteomics Cox10 sig, MitoProteomics Cox10 oxphos, Metabolomics Cox10 data, Metabolomics Cox10 stats, Metabolic tracing (glucose), Metabolic tracing (lac,pyr)]
