# Supplementary material for: Differential requirements for mitochondrial electron transport chain components in the adult murine liver
Source: eLife. 2022 Sep 26;11:e80919. doi: 10.7554/eLife.80919 (PMC9648974; doi:10.7554/eLife.80919)
Supplement: Supplementary file 3. [file elife-80919-supp3.xlsx]

## Sheet: SuppFile3
Supplementary File 3 - Numerical data presented in Figures and Figure Supplements
Tables
	Figure 1		Numerical data for panels presented in Figure 1
	Figure 1 - fs1		Numerical data for panels presented in Figure 1 - figure supplement 1
	Figure 1 - fs2		Numerical data for panels presented in Figure 1 - figure supplement 2
	Figure 1 - fs3		Numerical data for panels presented in Figure 1 - figure supplement 3
	Figure 2		Numerical data for panels presented in Figure 2
	Figure 3		Numerical data for panels presented in Figure 3
	Figure 4		Numerical data for panels presented in Figure 4
	Figure 5		Numerical data for panels presented in Figure 5
	Figure 5 - fs4		Numerical data for panels presented in Figure 5 - figure supplement 4
	Figure 5 - fs5		Numerical data for panels presented in Figure 5 - figure supplement 5
	Figure 5 - fs6		Numerical data for panels presented in Figure 5 - figure supplement 6
	Figure 5 - fs7		Numerical data for panels presented in Figure 5 - figure supplement 7
	Figure 6		Numerical data for panels presented in Figure 6

## Sheet: Figure 1
Figure 1A: Ndufa9 mRNA levels (normalized)					Figure 1C: cI activity (mOD/min/mg)					Figure 1F: Liver Weight / Body Weight (%)					Figure 1G: Fasting Plasma Glucose (mg/dL)					Figure 1H: Total Protein (g/dL), Albumin (g/dL), Total Bilirubin (mg/dL)								Figure 1I: ALT (U/L), AST (U/L)
	ndufa9f/f	ndufa9-/-				ndufa9f/f	ndufa9-/-				ndufa9f/f	ndufa9-/-				ndufa9f/f	ndufa9-/-				Total Protein								ALT (U/L)
	1.12438	0.104856				0.09558	0.01124				4.64789	3.62903				117.6	118.9				ndufa9f/f	ndufa9-/-							ndufa9f/f	ndufa9-/-
	1.11169	0.354617				0.05636	0.004542				4.18848	4.54545				77.7	107.7				5.58	5.34							21	26
	0.763926	0.095675				0.0748	0.01299				4.28571	4.57516				85.8	80.1				5.76	5.52							25	30
											4.81928	3.7037				77.3	77.8				5.64	5.3							19	17
Mean	1	0.185049			Mean	0.07558	0.00959067					4.46927				132.7	87.4				5.47	5.71							18	20
St. Dev.	0.204544	0.146922			St. Dev.	0.0196216	0.00445897									106.6	118.5					5.2								22
n	3	3			n	3	3			Mean	4.48534	4.18453				62.9	121.8
										St. Dev.	0.297719	0.475319				96.3	128.9			Mean	5.6125	5.414						Mean	20.75	23
										n	4	5				95.1	83.7			St. Dev.	0.120934	0.201941						St. Dev.	3.0957	5.09902
																89.9	102			n	4	5						n	4	5
																93.9	94.7
																101	102				Albumin								AST (U/L)
																	71.9				ndufa9f/f	ndufa9-/-							ndufa9f/f	ndufa9-/-
																	74.8				2.7	2.69							102	100
																					2.74	2.69							93	135
															Mean	94.7333	97.8714				2.87	2.82							82	67
															St. Dev.	18.7285	19.1749				2.79	2.99							97	79
															n	12	14					2.66								104
																				Mean	2.775	2.77						Mean	93.5	97
																				St. Dev.	0.0732575	0.137659						St. Dev.	8.5049	26.1056
																				n	4	5						n	4	5
																					Total Bilirubin
																					ndufa9f/f	ndufa9-/-
																					0.31	0.3
																					0	0
																					0.11	0
																						0
																						0.12
																				Mean	0.14	0.084
																				St. Dev.	0.157162	0.131453
																				n	3	5

## Sheet: Figure 1 - fs1
Figure 1 - fs1A: OCR (pmol/min/10K cells)					Figure 1 - fs1B: NAD+/NADH (normalized)
	ndufa9f/f	ndufa9-/-				ndufa9f/f	ndufa9-/-
	73.7735	5.00362				1.08143	0.181183
	82.9092	5.21008				1.00307	0.130097
	73.2179	8.64601				0.915499	0.175664
	86.9655	5.53321
	83.8255	5.42633			Mean	1	0.162315
	93.5742	5.20736			St. Dev.	0.0830096	0.0280372
	91.6301	8.69392			n	3	3
	96.4788	5.09233
	87.7488	7.09586
	88.0666	4.64823
	98.678	7.1729
	93.9363	10.6449
	94.0873	4.57485
	104.144	5.52785
	97.1709	5.68147
	92.4516	6.19914
	90.8458	6.81161
	92.2215	10.3592
	92.8615	6.14371
	95.7884	6.28572
	92.3992	6.54101
	92.9214	6.12161
	75.4153
	76.0254
Mean	89.464	6.48277
St. Dev.	8.1734	1.70703
n	24	22

## Sheet: Figure 1 - fs2
Figure 1 - fs2B: Liver Weight / Body Weight					Figure 1 - fs2C: Fasting Plasma Glucose (mg/dL)					Figure 1 - fs2D: Total Protein (g/dL), Albumin (g/dL), Total Bilirubin (mg/dL)								Figure 1 - fs2E: ALT (U/L), AST (U/L)
	ndufa9f/f	ndufa9-/-				ndufa9f/f	ndufa9-/-				Total Protein								ALT (U/L)
	0.0417202	0.0377551				83.7	140.1				ndufa9f/f	ndufa9-/-							ndufa9f/f	ndufa9-/-
	0.0384036	0.0432742				111.7	129.1				5.49	5.19							37	33
	0.0446122	0.0452548				106.9	119.4				5.53	5.46							26	44
	0.0389279	0.0462098				118.7	160				5.85	5.33							42	32
											5.41	5.63							29	22
Mean	0.040916	0.0431235			Mean	105.25	137.15
St. Dev.	0.00286201	0.00378198			St. Dev.	15.1617	17.4231			Mean	5.57	5.4025						Mean	33.5	32.75
n	4	4			n	4	4			St. Dev.	0.193218	0.187506						St. Dev.	7.32575	8.99537
										n	4	4						n	4	4
											Albumin								AST (U/L)
											ndufa9f/f	ndufa9-/-							ndufa9f/f	ndufa9-/-
											3.21	2.87							154	198
											2.98	2.72							137	167
											3.06	3.11							126	148
											2.55	2.8							210	136
										Mean	2.95	2.875						Mean	156.75	162.25
										St. Dev.	0.283196	0.168226						St. Dev.	37.3218	27.0355
										n	4	4						n	4	4
											Total Bilirubin
											ndufa9f/f	ndufa9-/-
											0.12	0.53
											0.25	0.5
											0.47	0.39
											0.62	0.22
										Mean	0.365	0.41
										St. Dev.	0.223084	0.140238
										n	4	4

## Sheet: Figure 1 - fs3
Figure 1 - fs3B: Fasting Plasma Glucose (mg/dL)					Figure 1 - fs3C: Total Protein (g/dL), Albumin (g/dL), Total Bilirubin (mg/dL)								Figure 1 - fs3D: ALT (U/L), AST (U/L)
	ndufa9f/f	ndufa9-/-				Total Protein								ALT (U/L)
	54.9	90.8				ndufa9f/f	ndufa9-/-							ndufa9f/f	ndufa9-/-
	47.1	85.4				5.44	5.85							25	22
	106.6	111.2				4.46	6.05							147	65
	78.4	85.9				6.25	6.21							46	21
						9.42	9.42							23	18
Mean	71.75	93.325												98
St. Dev.	26.7724	12.1632			Mean	6.3925	6.8825
n	4	4			St. Dev.	2.14693	1.69807						Mean	67.8	31.5
					n	4	4						St. Dev.	53.6162	22.3979
													n	5	4
						Albumin
						ndufa9f/f	ndufa9-/-							AST (U/L)
						2.77	3.03							ndufa9f/f	ndufa9-/-
						2.21	3.18							57	83
						3.08	3.09							203	179
						5.2	2.69							173	99
														68	92
					Mean	3.315	2.9975							162
					St. Dev.	1.30722	0.214068
					n	4	4						Mean	132.6	113.25
													St. Dev.	65.843	44.3199
						Total Bilirubin							n	5	4
						ndufa9f/f	ndufa9-/-
						0.52	0.18
						1.12	0.13
						0.24	0.26
						0.3	0.13
					Mean	0.545	0.175
					St. Dev.	0.401788	0.0613732
					n	4	4

## Sheet: Figure 2
Figure 2A: ATP (nmol/mg)				Figure 2B: GSH/GSSG				Figure 2C: NAD+/NADH, NADPH/NADP+					Figure 2D: pyruvate/lactate, acetoacetate/b-hydroxybutyrate (normalized)							Figure 2E: Tissue a-hydroxybutyrate, Plasma a-hydroxybutyrate (normalized)								Figure 2J: Relative Protein amount (vs. actin)						Figure 2K: mtDNA/nDNA				Figure 2N: Metabolite Abundances (normalized)
	ndufa9f/f	ndufa9-/-			ndufa9f/f	ndufa9-/-			NAD+/NADH					pyruvate/lactate							Tissue a-hydroxybutyrate								Tomm20						ndufa9f/f	ndufa9-/-			pyruvate				alanine
	3.38735	5.06378			1.99301	1.24035			ndufa9f/f	ndufa9-/-				ndufa9f/f	ndufa9-/-						ndufa9f/f	ndufa9-/-							ndufa9f/f	ndufa9-/-					931	754			ndufa9f/f	ndufa9-/-			ndufa9f/f	ndufa9-/-
	3.99846	3.00219			1.41474	1.34076			2.53098	2.70978				0.940963	0.526158						0.517298	0.623493							1.11212	1.4066					833	1232			0.986206	0.807111			1.12341	0.848485
	3.28683	4.46745			1.25519	1.13921			4.10794	3.0675				1.18039	0.812898						0.825396	1.19078							1.45421	2.19343					861	1011			0.852978	0.765445			0.301927	0.638215
					1.55739	1.24557			2.54421	2.95881				1.63144	1.46909						0.553906	0.955858							0.950537	0.932421					1150	996			1.50907	1.17042			1.19269	0.675436
Mean	3.55754	4.17781			1.03659	1.12832			3.68824	3.67657				0.677751	1.38936						1.30917	1.537							0.483131	0.961523					1124	679			1.02695	1.60038			1.38014	1.06235
St. Dev.	0.385136	1.06088			1.2676	1.31372			3.32022	3.14731				0.598491	1.77529						1.59917	1.97547													1161	1100			0.936449	0.309429			1.08647	0.588827
n	3	3			1.09529	0.746803			3.74772	4.17693				0.970967	0.203585						1.19505	0.653515						Mean	1	1.37349					1223	1177			0.688347	1.48923			0.915354	1.08371
					1.6229	1.09091																						St. Dev.	0.403516	0.58812					1037	824
						0.505453		Mean	3.32322	3.28948			Mean	1	1.0294					Mean	1	1.15602						n	4	4						970		Mean	1.06233	0.930559		Mean	1.01693	0.762663
								St. Dev.	0.657833	0.538942			St. Dev.	0.374336	0.61014					St. Dev.	0.437065	0.528017																St. Dev.	0.258022	0.483349		St. Dev.	0.415398	0.193967
				Mean	1.40534	1.08346		n	6	6			n	6	6					n	6	6							PC					Mean	1040	971.444		n	5	5		n	5	5
				St. Dev.	0.313854	0.278999																							ndufa9f/f	ndufa9-/-				St. Dev.	148.356	188.21
				n	8	9			NADPH/NADP+					acetoacetate/b-hydroxybutyrate							Plasma a-hydroxybutyrate								1.09562	1.45353				n	8	9			lactate				citrate
									ndufa9f/f	ndufa9-/-				ndufa9f/f	ndufa9-/-						ndufa9f/f	ndufa9-/-							1.20871	1.84798									ndufa9f/f	ndufa9-/-			ndufa9f/f	ndufa9-/-
									1.9263	2.09936				0.6223	1.24395						0.918015	0.536499							1.13785	0.936406									1.00561	0.952647			0.737167	0.861346
									1.90941	1.75665				0.653076	1.01736						1.10822	1.16761							0.557821	1.39989									0.842884	1.39583			1.10753	1.07075
									1.67629	3.42877				0.271437	0.380807						0.586076	0.943449																	0.887514	0.764415			1.04402	1.12835
									1.93645	1.75194				2.71089	1.14985						1.38769	1.00026						Mean	1	1.40945									0.834751	0.864946			0.938246	0.715826
									1.46349	2.6331				1.11414	1.79356							0.608709						St. Dev.	0.298456	0.373325									1.32571	1.45831			1.15321	0.766838
									2.06458	1.35952				0.62816	0.67419													n	4	4									1.10353	1.02845			1.01983	0.591245
								Mean	1.82942	2.17156			Mean	1	1.04329					Mean	1	0.851305																Mean	0.979294	1.08723		Mean	0.996034	0.908624
								St. Dev.	0.219039	0.749194			St. Dev.	0.88003	0.487918					St. Dev.	0.336685	0.268646																St. Dev.	0.205318	0.318068		St. Dev.	0.165672	0.183083
								n	6	6			n	6	6					n	4	5																n	5	5		n	5	5
																																							2-hydroxyglutarate				glutamate
																																							ndufa9f/f	ndufa9-/-			ndufa9f/f	ndufa9-/-
																																							0.929809	2.38606			0.68312	1.28028
																																							0.890973	1.35108			1.15341	0.71999
																																							0.90416	1.69755			0.716893	0.996174
																																							0.687256	0.496974			1.22863	0.898284
																																							1.04776	1.10603			0.853988	0.510009
																																							1.54004	0.553367			1.36397	0.659781
																																						Mean	0.891992	1.40754		Mean	0.927207	0.880948
																																						St. Dev.	0.130154	0.700863		St. Dev.	0.250595	0.290064
																																						n	5	5		n	5	5
																																							succinate				fumarate
																																							ndufa9f/f	ndufa9-/-			ndufa9f/f	ndufa9-/-
																																							1.25036	1.01753			0.751369	1.28202
																																							0.788095	0.852528			1.60694	1.05254
																																							0.744767	1.79705			0.537646	2.00014
																																							0.849685	1.10744			0.769024	1.04001
																																							1.52383	1.35111			1.01662	1.7789
																																							0.843254	0.925096			1.31839	0.922108
																																						Mean	1.03135	1.22513		Mean	0.936321	1.43072
																																						St. Dev.	0.340886	0.366996		St. Dev.	0.411498	0.436824
																																						n	5	5		n	5	5
																																							malate
																																							ndufa9f/f	ndufa9-/-
																																							0.860375	0.968579
																																							0.909243	0.937503
																																							0.909622	0.972748
																																							1.06202	0.882967
																																							1.10359	0.921757
																																							1.15516	0.88572
																																						Mean	0.968969	0.936711
																																						St. Dev.	0.106843	0.0368338
																																						n	5	5

## Sheet: Figure 3
Figure 3B: Enrichment, glucose m+6; plasma						Figure 3C: Enrichment, glucose m+6; liver					Figure 3D: Fraction labeled; liver; relative to glucose								Figure 3F: Perfusion (K, Institutional Units)					Figure 3G: DeltaT2* (%)				Figure 3I: T1app (msec)						Figure 3J: T1app, average (msec)					Figure 3K: DeltaT1average (%)
	ndufa9 f/f						ndufa9f/f	ndufa9-/-				Glucose				3PG				ndufa9f/f	ndufa9-/-				ndufa9f/f	ndufa9-/-		ndufa9 f/f			ndufa9 -/-				ndufa9 f/f					ndufa9f/f	ndufa9-/-
	0hr	1hr	3hr	4hr			0.3016	0.2759				ndufa9f/f	ndufa9-/-			ndufa9f/f	ndufa9-/-			11.22	9				19.96	13.48		Room Air	100% O2		Room Air	100% O2			Room Air	100% O2				1.2864	-0.6347
	0.0052	0.3887	0.5795	0.5832			0.3506	0.2959				1	1			0.753902	0.696695			15.95	11.6				4.4	10.64		332.993	245.417		322.725	317.57			293.893	295.437				1.9452	2.0597
	0.0214	0.5077	0.5222	0.5228			0.2714	0.395				1	1			0.775379	0.602411			9.59	15.9				21.03	9.78		338.709	235.07		263.976	312.797			293.282	295.689				5.3467	-0.2241
	0.007	0.543	0.4032	0.5302								1	1			0.766706	0.709976				8.3					8.56		309.588	216.189		263.479	346.971			288.427	301.543					3.2231
						Mean	0.307867	0.322267																				336.217	284.568		271.155	325.421
Mean	0.0112	0.4798	0.501633	0.5454		St. Dev.	0.0399702	0.0637778			Mean	1	1		Mean	0.765329	0.669694		Mean	12.2533	11.2			Mean	15.13	10.615		271.25	257.743		223.854	303.563							Mean	2.85943	1.106
St. Dev.	0.00887919	0.0808451	0.0899314	0.0329442		n	3	3			St. Dev.	0	0		St. Dev.	0.0108045	0.058646		St. Dev.	3.30352	3.43996			St. Dev.	9.30784	2.09198		268.296	217.664		256.144	285.296			ndufa9 -/-				St. Dev.	2.17908	1.84308
n	3	3	3	3							n	3	3		n	3	3		n	3	4			n	3	4		308.333	240.417		294.485	315.876			Room Air	100% O2			n	3	4
																												269.196	229.533		258.85	333.57			302.269	297.416
	ndufa9 -/-											PEP				pyruvate												305.156	256.065		297.019	288.758			292.782	296.662
	0hr	1hr	3hr	4hr								ndufa9f/f	ndufa9-/-			ndufa9f/f	ndufa9-/-											271.615	270.138		276.17	316.243			321.923	317.038
	0.0077	0.3276	0.4992	0.499								0.821128	0.746681			0.609177	0.520455											275.277	291.922		320.001	264.698			169.669	173.272
	0.0281	0.4201	0.6484	0.6587								0.820675	0.690599			0.512534	0.475887											319.632	244.971		317.193	263.961
	0.0062	0.4152	0.5426	0.5436								0.802435	0.754501			0.570332	0.488078											281.454	271.316		289.278	272.86
																												316.82	260.143		308.242	319.753
Mean	0.014	0.387633	0.5634	0.5671							Mean	0.814746	0.730594		Mean	0.564014	0.494807											289.059	239.642		308.667	334.821
St. Dev.	0.012234	0.0520481	0.076744	0.0824027							St. Dev.	0.010664	0.0348564		St. Dev.	0.0486303	0.0230333											247.164	262.038		266.712	342.827
n	3	3	3	3							n	3	3		n	3	3											225.398	251.321		301.431	336.162
																												243.191	271.709		271.865	291.249
												lactate				alanine												241.13	227.459		266.4	340.169
												ndufa9f/f	ndufa9-/-			ndufa9f/f	ndufa9-/-											289.676	271.438		288.625	352.381
												0.745231	0.692766			0.710418	0.680845											322.894	338.423		285.262	325.997
												0.702532	0.643999			0.658228	0.624492											315.824	318.425		289.063	334.387
												0.74699	0.707543			0.712187	0.685036											321.399	329.55		335.008	281.307
																												292.251	344.007		254.385	319.907
											Mean	0.731584	0.681436		Mean	0.693611	0.663458											269.244	242.299		295.252	281.653
											St. Dev.	0.0251754	0.0332526		St. Dev.	0.0306553	0.0338103											311.402	259.378		246.711	334.742
											n	3	3		n	3	3											352.266	256.685		253.587	301.223
																												307.438	250.213		239.692	315.876
												citrate				fumarate												236.586	263.015		289.391	337.391
												ndufa9f/f	ndufa9-/-			ndufa9f/f	ndufa9-/-											274.546	239.364		281.158	325.936
												0.706283	0.678407			0.648526	0.53793											326.963	252.728		281.575	307.099
												0.640233	0.713086			0.581162	0.58304											241.857	239.502		254.249	353.731
												0.742226	0.759976			0.650258	0.607178											243.285	238.241		237.814	202.086
																												253.716	248.348		250.792	234.77
											Mean	0.696247	0.717156		Mean	0.626649	0.576049											368.257	357.172		291.134	272.966
											St. Dev.	0.0517318	0.0409366		St. Dev.	0.0394021	0.0351493											241.034	328.378		265.211	268.434
											n	3	3		n	3	3											330.291	298.184		319.408	262.627
																												294.191	372.651		356.088	287.644
												succinate				malate												312.93	278.972		366.106	331.127
												ndufa9f/f	ndufa9-/-			ndufa9f/f	ndufa9-/-											311.657	326.245		293.714	311.055
												0.632253	0.544703			0.670668	0.548361											264.787	204.84		278.099	312.715
												0.575205	0.589678			0.609208	0.603089											259.614	205.712		260.673	254.709
												0.644568	0.60073			0.668387	0.633212											272.594	225.861		292.81	286.831
																												297.616	248.476		229.616	313.146
											Mean	0.617342	0.57837		Mean	0.649421	0.594887											272.094	218.207		237.304	296.762
											St. Dev.	0.0370076	0.0296758		St. Dev.	0.0348441	0.043016											306.856	231.045		262.964	355.268
											n	3	3		n	3	3											287.207	202.792		323.707	300.085
																												297.258	220.326		303.78	382.654
												aspartate				glutamate												348.223	282.981		290.5	357.903
												ndufa9f/f	ndufa9-/-			ndufa9f/f	ndufa9-/-											296.707	257.607		315.473	420.607
												0.608243	0.448659			0.471789	0.472907											256.851	279.414		265.5	334.598
												0.566642	0.478055			0.44279	0.489163											279.526	259.976		361.142	317.753
												0.559878	0.521655			0.482334	0.54927											355.612	418.057		328.171	271.81
																												354.119	345.693		272.297	234.851
											Mean	0.578254	0.48279		Mean	0.465638	0.50378											318.652	334.571		356.049	295.119
											St. Dev.	0.0261902	0.0367276		St. Dev.	0.0204771	0.0402252											307.695	375.14		214.229	229.911
											n	3	3		n	3	3											303.075	317.125		299.955	234.39
																												273.466	286.573		233.432	258.173
																												301.261	348.791		257.808	271.91
																												245.738	340.527		272.902	304.833
																												252.998	304.655		256.935	273.386
																												299.924	336.552		345.089	299.465
																												282.554	237.771		298.927	289.908
																												335.278	239.85		270.591	274.187
																												328.024	233.452		260.25	229.166
																												320.872	208.852		266.976	276.361
																												276.737	195.214		277.118	327.188
																												309.076	204.471		238.712	281.319
																												239.418	211.681		300.7	358.784
																												293.061	232.866		283.199	331.621
																												302.418	192.735		281.485	300.138
																												321.788	222.161		285.935	275.094
																												263.91	249.814		221.091	303.501
																												225.992	263.969		286.332	354.001
																												283.323	269.91		264.479	360.967
																												328.783	294.458		307.996	330.981
																												303.296	301.373		355.636	327.749
																												307.313	254.25		262.62	263.826
																												335.146	312.001		284.997	197.8
																												307.375	344.597		258.277	201.126
																												343.8	341.263		293.837	377.216
																												298.033	396.303		254.951	216.719
																												279.372	286.254		266.173	242.513
																												285.7	367.169		286.027	257.681
																												258.606	307.955		258.259	266.334
																												291.269	294.511		309.819	329.631
																												277.708	294.426		285.535	275.394
																												328.734	269.451		345.744	289.882
																												326.377	279.908		308.742	300.13
																												291.529	266.774		274.03	285.948
																												252.134	204.74		242.597	310.523
																												275.414	227.215		236.213	248.039
																												296.811	203.34		259.285	285.912
																												326.819	204.81		297.929	325.465
																												327.216	217.623		236.615	312.452
																												274.748	226.585		355.019	299.369
																												266.47	231.17		344.946	328.199
																												292.657	223.05		259.609	304.333
																												306.788	264.966		224.899	280.884
																												288.126	245.21		268.641	310.885
																												304.294	256.966		231.104	293.114
																												288.488	277.894		314.726	347.804
																												345.373	289.078		253.883	328.227
																												345.379	269.622		312.592	373.482
																												271.851	261.578		341.419	419.666
																												299.516	308.21		284.491	368.209
																												319.601	364.14		364.839	374.076
																												278.28	328.564		262.702	227.981
																												283.076	333.896		211.441	253.593
																												315.063	339.578		319.505	311.467
																												278.132	314.661		289.229	278.631
																												252.789	314.264		314.746	366.538
																												261.895	354.494		301.406	228.379
																												280.359	341.541		336.985	287.717
																												354.011	274.644		349.584	312.907
																												359.653	293.68		370.451	284.3
																												259.648	315.771		362.355	253.124
																												312.778	254.722		243.952	308.215
																												283.251	292.388		277.296	343.658
																												286.72	262.822		275.41	314.143
																												252.795	319.624		327.2	284.709
																												262.579	213.629		315.428	311.692
																												292.199	244.452		298.026	339.773
																												293.557	237.025		276.897	337.145
																												262.846	235.143		311.109	336.993
																												279.143	271.255		345.142	333.926
																												314.342	226.863		320.395	346.183
																												244.896	252.265		329.668	412.344
																												287.379	264.733		267.255	370.479
																												307.09	293.881		325.655	403.075
																												279.699	234.786		324.476	247.933
																												242.017	295.845		318.022	258.323
																												263.296	285.441		258.104	323.489
																												276.927	294.009		299.122	349.858
																												266.095	353.246		348.557	466.667
																												246.386	314.988		344.491	404.792
																												293.881	306.405		328.572	378.224
																												311.053	357.959		323.05	352.855
																												229.189	302.365		369.288	299.374
																												293.564	287.444		231.567	219.26
																												329.402	304.144		220.284	256.498
																												252.869	306.401		256.252	247.496
																												320.971	310.32		285.128	260.308
																												354.435	365.596		295.54	261.474
																												322.478	275.715		355.602	294.18
																												287.464	300.37		357.485	279.686
																												247.085	336.785		367.194	299.156
																												304.011	264.841		329.714	324.886
																												314.567	316.01		287.496	280.042
																												264.587	279.808		333.671	328.554
																												281.764	299.585		283.896	294.19
																												292.894	301.789		320.164	332.84
																												287.901	236.033		268.545	284.185
																												254.356	234.756		303.214	289.781
																												255.56	277.489		257.013	207.826
																												258.62	245.145		208.692	263.782
																												299.779	280.039		289.566	239.22
																												309.177	267.497		262.95	365.83
																												285.997	252.959		261.239	296.083
																												261.039	271.488		331.443	343.201
																												336.15	319.908		315.9	334.393
																												291.086	288.276		291.847	307.621
																												284.916	235.241		303.364	301.358
																												256.753	277.666		326.739	291.852
																												266.392	275.079		304.526	304.591
																												317.021	359.186		296.173	285.84
																												301.942	277.184		298.83	291.601
																												361.039	303.448		269.661	294.534
																												293.006	313.001		288.299	298.038
																												276.421	324.719		274.542	284.846
																												324.364	319.39		270.157	269.226
																												305.128	314.729		328.49	287.491
																												314.359	291.008		298.518	303.662
																												301.245	300.491		336.656	336.958
																												328.586	326.539		309.858	385.228
																												286.983	282.703		371.941	416.782
																												264.749	264.941		325.144	385.544
																												245.169	219.442		317.432	396.663
																												296.985	346.571		330.247	448.454
																												336.062	313.775		341.569	431.236
																												307.312	354.493		327.724	332.4
																												366.029	347.185		351.378	424.094
																												273.027	298.943		345.038	285.715
																												288.775	347.825		218.662	219.67
																												328.466	409.902		323.546	318.467
																												337.954	288.88		333.666	304.018
																												295.606	317.144		278.215	308.015
																												306.921	309.335		318.29	305.578
																												271.265	328.49		337.436	278.282
																												279.96	318.098		363.513	310.119
																												312.172	327.016		308.525	336.662
																												362.969	378.988		254.79	280.664
																												375.68	357.959		354.896	262.095
																												266.623	274.619		277.51	279.407
																												248.918	284.386		271.129	297.818
																												214.528	261.053		287.396	269.578
																												310.851	280.822		344.382	294.461
																												268.61	298.535		320.355	262.077
																												285.859	260.652		281.249	317.992
																												360.866	354.681		303.104	381.879
																												347.032	314.293		254.759	338.292
																												305.284	370.137		288.847	376.026
																												276.535	308.443		317.803	378.65
																												256.157	282.121		292.188	336.23
																												286.654	265.995		285.382	295.487
																												290.524	271.338		372.995	288.285
																												235.085	185.376		317.563	304.898
																												272.607	215.152		303.946	289.194
																												275.369	244.842		327.067	331.668
																												268.781	268.654		335.804	351.022
																												329.496	269.74		316.773	330.732
																												315.222	309.496		332.848	290.601
																												273.116	353.071		323.136	308.55
																												345.444	339.08		301.881	343.05
																												298.377	340.236		333.569	348.952
																												358.815	326.136		283.489	237.123
																												324.136	348.54		266.545	289.095
																												304.305	361.113		262.154	312.24
																												289.623	388.258		337.509	299.431
																												362.351	392.65		321.41	285.611
																												284.243	306.314		340.6	347.288
																												281.881	279.548		320.126	370.04
																												290.134	337.176		355.459	352.834
																												350.561	383.733		313.939	390.646
																												291.304	273.582		316.007	413.038
																												235.556	279.524		341.715	416.799
																												255.056	230.674		288.844	325.89
																												322.233	340.647		365	480.463
																												265.208	349.384		336.051	297.821
																												271.571	347.751		212.625	263.602
																												325.645	258.75		225.501	307.601
																												276.423	321.256		205.14	244.476
																												275.36	306.692		298.246	299.614
																												259.832	338.386		335.68	368.586
																												212.828	231.999		260.115	341.254
																												255.364	289.093		268.704	296.095
																												241.276	178.415		316.754	328.126
																												233.038	248.614		328.339	241.449
																												232.197	233.208		263.399	289.442
																												251.218	242.383		313.519	279.072
																												281.266	328.24		323.587	310.558
																												343.778	408.864		355.656	295.812
																												322.945	322.427		316.36	320.627
																												308.417	318.624		338.403	361.826
																												316.5	342.813		254.941	334.73
																												324.436	359.93		333.796	341.773
																												342.301	388.84		339.889	308.957
																												354.067	392.803		278.335	297.786
																												343.525	336.3		285.044	339.215
																												299.085	309.904		320.02	355.823
																												316.326	281.642		320.882	318.784
																												323.977	285.343		371.709	330.571
																												280.808	328.679		269.515	314.484
																												310.03	306.789		290.733	306.609
																												307.096	268.713		310.57	320.197
																												333.179	310.727		288.983	309.649
																												235.653	292.446		274.689	311.498
																												321.983	328.067		319.987	313.564
																												277.986	270.569		329.75	306.6
																												271.359	283.247		284.417	356.475
																												316.862	287.154		293.594	335.101
																												380.308	282.867		337.684	286.422
																												238.662	328.03		341.517	275.157
																												277.56	300.665		287.302	284.812
																												334.532	354.992		341.477	343.246
																												258.999	331.652		284.073	331.907
																												296.307	337.17		286.39	310.052
																												292.328	329.756		313.194	355.436
																												261.895	354.496		274.189	336.208
																												381.184	320.183		315.749	334.554
																												288.895	380.281		327.893	319.686
																												328.126	324.832		344.834	331.988
																												327.627	272.996		304.516	359.209
																												292.093	273.612		370.928	384.892
																												315.924	307.801		329.699	340.189
																												271.363	322.199		222.226	262.971
																												316.442	286.593		215.828	281.586
																												297.636	361.147		309.006	359.05
																												318.458	338.243		314.62	289.187
																												301.779	353.975		325.417	317.88
																												347.785	357.152		292.416	364.492
																												346.586	303.073		280.839	282.854
																												303.113	346.698		326.915	297.531
																												333.034	306.206		286.794	311.566
																												303.878	298.915		309.627	333.415
																												263.035	270.985		329.598	294.203
																												272.591	338.574		339.41	319.3
																												236.219	291.284		368.061	311.806
																												261.664	314.496		320.527	313.651
																												216.552	301.414		341.383	350.685
																												300.875	363.723		323.291	375.698
																												262.156	326.034		296.817	349.701
																												284.537	390.844		346.435	370.767
																												288.881	333.007		320.464	296.657
																												299.462	322.891		301.989	388.167
																												316.39	351.381		360.143	355.627
																												327.732	339.662		358.213	319.045
																												337.115	390.183		326.412	310.839
																												337.955	316.484		325.505	339.045
																												323.458	338.201		251.549	250.762
																												317.326	299.967		236.986	299.686
																												330.846	270.119		275.127	291.739
																												254.906	293.911		279.414	323.368
																												332.238	291.6		285.725	365.172
																												284.229	377.235		329.264	288.337
																												324.69	325.473		346.552	331.586
																												295.29	235.541		282.944	266.457
																												249.063	259.729		295.263	308.183
																												237.06	280.094		314.692	360.088
																												250.63	306.974		326.028	293.672
																												315.509	278.638		326.832	319.321
																												302.394	229.812		318.548	291.893
																												319.437	328.537		285.503	250.654
																												316.153	263.262		271.349	294.766
																												305.403	289.556		279.483	315.544
																												343.137	345.384		285.385	299.255
																												315.182	313.139		295.259	375.955
																												338.071	313.814		356.099	397.7
																												309.016	338.546		276.15	300.379
																												298.129	246.063		319.21	345.175
																												226.096	233.096		284.559	280.145
																												319.345	357.667		344.211	295.016
																												296.189	276.281		327.197	302.568
																												259.614	250.106		297.926	308.917
																												309.566	343.645		350.025	331.331
																												312.969	313.468		315.648	295.012
																												319.965	295.392		319.766	309.895
																												344.198	332.402		337.682	286.13
																												295.696	323.133		274.722	297.48
																												323.559	288.962		362.9	309.367
																												384.216	291.657		292.537	330.158
																												322.606	301.694		309.267	302.817
																												374.93	398.632		302.552	259.61
																												290.325	316.601		240.695	249.325
																												280.283	306.868		306.329	319.947
																												251.571	263.306		266.629	304.375
																												310.898	280.321		256.586	282.748
																												380.155	358.608		253.242	275.103
																												283.749	289.481		272.42	256.971
																												293.312	352.159		303.833	288.781
																												273.26	296.002		288.842	276.853
																												340.191	331.252		242.636	303.067
																												313.5	309.471		293.15	326.299
																												289.45	263.203		288.822	308.98
																												251.799	323.399		323.795	329.057
																												279.572	263.529		294.185	336.024
																												278.698	282.522		331.443	333.128
																												264.352	275.023		307.499	289.215
																												265.364	241.289		285.996	301.271
																												283.168	205.77		284.133	320.463
																												215.71	241.731		282.545	311.173
																												352.802	308.49		276.104	288.723
																												346.753	293.349		243.446	295.071
																												314.818	303.821		312.442	268.482
																												286.364	310.93		332.955	344.449
																												303.858	363.928		345.869	425.522
																												320.171	328.114		273.174	298.496
																												275.535	259.338		337.307	288.906
																												293.201	253.914		334.463	305.594
																												349.716	366.114		364.352	305.114
																												312.142	366.54		346.739	308.026
																												310.574	362.949		335.461	359.874
																												260.096	306.209		295.662	307.646
																												349.342	332.56		322.44	309.607
																												341.017	313.073		267.414	264.007
																												272.639	352.48		306.803	288.937
																												297.25	350.517		297.06	303.887
																												375.646	292.228		305.195	299.78
																												347.81	327.754		286.039	328.322
																												297.745	322.454		238.808	237.479
																												332.28	350.295		268.6	238.556
																												286.49	280.028		269.251	292.311
																												258.444	260.893		340.582	296.451
																												296.692	335.643		334.905	310.968
																												293.175	374.249		336.079	315.7
																												324.659	312.014		293.82	293.586
																												293.443	332.548		333.025	286.429
																												237.61	315.939		294.964	259.805
																												303.965	287.228		271.988	321.662
																												291.307	336.995		353.302	283.331
																												301.527	298.228		315.022	297.114
																												327.171	324.547		275.434	295.372
																												294.485	334.123		266.584	296.627
																												305.423	313.945		323.454	308.667
																												318.888	269.561		307.459	311.239
																												323.016	275.336		291.96	300.918
																												286.652	202.542		276.604	293.013
																												232.445	231.97		320.864	309.169
																												252.879	266.867		259.213	292.733
																												333.987	226.2		304.693	386.963
																												244.381	321.68		298.195	356.949
																												325.166	342.785		322.92	280.833
																												349.262	314.018		298.863	329.718
																												316.599	281.733		293.451	353.839
																												257.128	315.251		290.391	378.473
																												273.969	327.449		303.378	380.13
																												235.182	310.425		311.578	266.648
																												308.901	330.849		295.27	252.587
																												372.363	344.944		363.583	286.928
																												341.946	326.476		298.717	280.775
																												348.807	330.81		310.906	311.835
																												347.627	311.717		313.557	311.596
																												310.299	363.958		259.003	276.748
																												374.995	365.74		302.573	276.512
																												325.835	287.74		268.533	276.479
																												323.549	298.806		243.008	208.354
																												353.065	305.612		243.693	317.142
																												253.878	284.173		224.3	256.778
																												358.756	344.346		367.757	294.363
																												246.849	303.984		268.775	306.276
																												284.047	283.673		320.502	329.183
																												288.599	236.504		298.134	309.82
																												302.904	246.902		301.292	289.034
																												273.237	299.126		320.164	250.256
																												312.692	323.01		297.786	286.386
																												314.417	325.933		354.78	352.454
																												304.81	304.338		278.654	285.672
																												300.307	304.79		284.794	281.331
																												308.941	295.87		285.978	299.562
																												286.986	317.241		305.32	294.17
																												364.343	275.579		314.074	277.037
																												326.582	321.511		273.345	304.214
																												273.223	319.323		304.918	306.212
																												291.616	290.257		296.097	310.593
																												232.951	169.864		288.764	321.426
																												229.094	264.842		263.198	324.044
																												267.593	350.542		294.744	379.359
																												322.395	339.674		289.97	310.611
																												296.285	347.991		324.407	320.116
																												307.581	286.167		338.768	306.963
																												268.67	312.659		240.487	320.86
																												380.901	321.612		302.89	359.587
																												345.836	355.781		327.052	295.629
																												301.205	326.72		278.145	266.927
																												279.874	342.9		303.742	264.751
																												301.789	381.366		286.225	322.315
																												284.63	286.442		322.074	292.715
																												294.781	320.922		300.08	288.17
																												332.443	321.012		310.375	311.854
																												303.781	353.032		222.203	260.731
																												293.041	281.412		297.157	252.196
																												334.227	276.895		281.143	348.207
																												287.754	299.407		308.646	280.231
																												296.264	269.061		276.29	245.447
																												323.049	319.792		316.902	266.418
																												315.072	316.423		299.579	253.817
																												312.714	368.249		308.808	310.915
																												310.794	280.89		300.381	303.052
																												278.509	288.893		354.922	283.619
																												361.28	300.712		343.026	299.465
																												241.294	312.6		303.454	289.303
																												282.786	347.657		310.546	318.8
																												290.218	350.627		326.304	284.941
																												285.408	294.16		359.615	255.796
																												273.491	305.317		269.342	306.283
																												303.85	291.198		337.149	236.615
																												319.894	336.123		320.88	307.24
																												344.237	247.912		331.673	287.5
																												269.3	335.238		265.349	347.071
																												243.008	276.178		334.435	288.307
																												260.576	352.362		308.515	308.888
																												288.44	272.09		309.537	363.174
																												290.16	324.805		298.259	268.884
																												262.781	322.357		245.69	320.261
																												245.574	336.33		286.721	340.827
																												314.779	331.668		275.543	280.464
																												287.018	348.688		249.312	298.283
																												319.131	302.689		277.322	285.119
																												366.841	367.455		351.979	447.503
																												339.861	282.674		330.398	311.299
																												309.37	326.861		358.667	248.913
																												326.726	288.283		307.446	212.026
																												329.061	286.446		289.571	287.639
																												302.234	246.893		365.843	330.395
																												277.968	342.067		255.968	328.282
																												276.562	277.705		260.375	239.503
																												321.218	369.85		363.283	301.473
																												343.535	384.421		286.027	279.243
																												275.006	351.078		316.767	274.391
																												309.193	331.685		236.089	251.462
																												353.402	436.738		299.238	259.626
																												317.626	313.104		321.277	299.53
																												219.192	280.619		326.186	296.993
																												280.698	277.131		291.734	298.85
																												308.927	302.015		339.334	308.589
																												305.141	274.786		360.89	314.152
																												339.798	407.875		323.859	310.691
																												348.191	332.774		324.354	284.527
																												285.622	333.817		279.841	263.666
																												324.24	347.967		291.217	249.678
																												317.074	298.02		297.306	286.711
																												311.626	321.842		299.105	301.533
																												223.057	285.519		299.934	331.923
																												334.064	315.59		298.835	204.659
																												273.484	260.317		277.995	266.984
																												333.171	296.383		323.34	279.696
																												292.582	404.998		321.278	373.154
																												301.254	250.754		346.572	339.248
																												274.988	238.497		336.743	332.629
																												245.219	311.314		281.034	267.145
																												285.663	320.387		254.152	285.894
																												318.124	299.658		244.699	312.697
																												304.928	322.821		294.999	196.882
																												295.38	332.906		273.381	311.789
																												265.169	353.083		306.675	316.114
																												245.098	250.45		354.19	406.448
																												278.299	238.152		369.006	351.008
																												310.468	338.072		329.041	351.267
																												228.07	281.291		334.149	389.047
																												332.143	289.268		363.324	331.516
																												289.333	307.925		289.045	300.542
																												333.773	287.686		275.715	225.299
																												369.521	378.737		285.811	260.33
																												381.221	336.545		311.865	272.634
																												330.56	305.096		274.51	276.742
																												327.532	332.083		315.843	333.781
																												327.358	357.733		325.601	295.026
																												366.873	363.579		346.947	324.494
																												273.565	336.659		233.864	262.395
																												363.725	293.363		274.966	198.158
																												315.508	325.268		342.697	313.301
																												299.801	308.939		293.243	274.137
																												282.692	322.243		249.22	276.594
																												275.234	327.443		294.23	284.755
																												301.848	332.976		362.918	296.875
																												247.846	307.946		334.506	280.261
																												262.279	329.579		285.967	258.247
																												295.931	365.056		289.67	271.611
																												344.263	328.007		274.612	260.137
																												287.666	308.202		289.099	269.628
																												329.96	361.739		309.731	368.153
																												277.839	281.915		361.829	267.16
																												344.344	328.964		288.545	271.724
																												354.364	320.505		256.035	316.406
																												261.048	305.052		301.84	280.472
																												258.449	283.159		271.934	330.767
																												308.11	323.099		279.887	253.057
																												233.448	274.624		244.79	239.167
																												296.216	295.902		328.862	302.536
																												279.427	300.958		275.249	234.964
																												294.053	270.454		272.403	226.645
																												258.144	246.833		332.823	279.374
																												322.084	273.034		332.04	281.546
																												294.587	333.005		289.034	348.195
																												375.085	347.514		288.689	274.066
																												344.927	330.432		320.125	290.424
																												356.746	338.84		254.986	214.325
																												333.084	362.237		345.387	300.653
																												347.717	327.797		312.743	293.938
																												350.46	278.036		333.256	278.16
																												309.485	390.654		251.084	247.61
																												323.843	278.287		334.67	362.369
																												253.26	305.862		357.162	301.238
																												262.829	310.236		314.535	362.514
																												293.972	340.561		300.396	318.749
																												307.857	330.906		247.715	259.76
																												287.598	312.968		332.51	267.508
																												347.573	296.572		287.84	313.011
																												316.097	268.892		280.643	277.244
																												239.233	308.269		283.291	294.62
																												338.951	367.958		262.02	310.757
																												330.721	318.611		282.129	303.179
																												355.186	357.17		270.723	275.9
																												269.623	296.157		344.227	273.577
																												229.488	252.26		353.53	305.632
																												306.254	319.886		281.356	299.425
																												241.111	307.022		300.853	232.263
																												272.814	258.842		270.132	293.217
																												263.681	245.512		255.536	329.075
																												272.693	235.076		211.083	178.107
																												288.369	272.802		221.861	202.83
																												309.182	282.765		232.314	192.276
																												312.213	299.601		269.617	222.758
																												307.35	354.24		284.834	230.14
																												296.675	315.82		219.29	220.126
																												336.405	339.908		273.846	283.35
																												306.362	361.568		270.097	279.323
																												293.58	318.718		239.749	215.42
																												358.204	323.882		230.838	259.011
																												280.92	305.464		276.564	339.223
																												252.565	259.286		252.698	301.521
																												279.82	268.452		319.175	300.149
																												298.35	309.258		289.236	259.208
																												331.17	250.572		371.72	268.65
																												362.486	234.483		345.704	233.25
																												256.219	345.344		328.975	211.938
																												283.341	302.867		308.477	311.761
																												330.124	400.55		347.812	373.057
																												302.711	305.429		317.716	333.925
																												334.784	299.07		282.269	344.374
																												299.307	342.089		262.568	311.358
																												339.999	356.865		281.255	266.34
																												330.393	358.289		258.328	296.978
																												295.558	300.771		335.156	335.573
																												267.97	285.202		308.993	306.042
																												269.735	277.672		301.853	226.388
																												219.661	212.731		230.251	210.273
																												244.686	235.611		308.761	257.321
																												274.166	266.98		223.511	215.423
																												320.157	337.571		215.607	188.816
																												286.165	231.621		236.593	225.258
																												257.498	249.676		234.992	242.637
																												237.59	237.623		252.581	234.118
																												242.469	335.866		264.053	282.833
																												277.766	256.804		227.238	189.863
																												254.208	241.621		235.309	273.802
																												325.263	255.318		299.862	282.753
																												305.794	296.245		228.559	196.304
																												327.108	304.339		309.091	287.587
																												303.841	357.123		305.845	207.887
																												344.673	276.8		231.638	267.79
																												273.601	289.335		330.379	401.147
																												273.241	306.039		277.985	351.374
																												331.172	322.135		333.406	304.403
																												256.932	301.797		270.198	315.871
																												213.9	249.962		290.971	295.818
																												333.899	389.161		262.924	326.708
																												315.58	290.336		261.754	296.901
																												282.29	325.292		283.771	275.553
																												311.046	347.103		281.81	309.683
																												302.953	350.168		278.517	349.797
																												352.304	352.772		257.525	281.522
																												298.309	353.344		296.008	329.515
																												342.798	306.599		327.061	259.325
																												225.04	274.12		238.869	274.276
																												219.022	257.527		215.708	217.556
																												333.374	282.326		205.351	241.069
																												289.702	259.688		283.296	246.754
																												235.345	280.414		266.194	198.482
																												270.475	312.001		294.085	207.936
																												248.264	241.421		223.515	187.855
																												283.831	310.638		269.459	192.366
																												276.406	284.393		230.795	239.291
																												211.401	226.857		217.632	230.354
																												295.257	223.145		358.188	361.454
																												233.022	292.82		344.224	265.676
																												238.469	293.971		222.254	150.561
																												271.17	358.375		325.994	289.263
																												296.083	285.682		285.524	366.673
																												294.344	316.745		297.429	284.048
																												287.707	286.271		256.312	242.167
																												314.176	329.059		256.453	314.382
																												339.528	300.548		268.755	277.106
																												359.611	326.777		262.423	340.831
																												301.278	297.74		245.273	320.088
																												256.958	271.458		304.688	296.619
																												245.656	254.7		288.414	269.653
																												352.922	278.72		317.554	298.565
																												328.822	312.501		262.785	305.705
																												210.295	186.66		308.366	343.273
																												227.183	207.851		328.039	249.299
																												298.637	253.625		318.965	298.694
																												247.946	267.272		257.723	283.3
																												269.306	300.26		230.019	199.253
																												302.587	283.538		231.436	226.854
																												231.731	252.778		221.924	225.15
																												227.781	303.333		291.443	277.406
																												281.36	360.699		227.727	254.613
																												294.142	281.795		229.359	242.791
																												257.205	275.548		300.67	276.194
																												302.001	269.702		290.435	328.068
																												280.423	284.444		247.19	268.35
																												278.412	353.16		256.756	207.7
																												346.405	293.278		318.567	235.583
																												243.447	285.114		300.418	240.626
																												246.235	286.854		297.62	279.186
																												239.279	244.449		270.654	231.198
																												300.576	268.996		259.406	261.757
																												297.134	281.929		258.468	310.984
																												311.166	275.358		249.771	324.96
																												217.454	205.861		216.325	243.65
																												257.014	335.614		248.719	224.898
																												354.463	266.096		301.998	299.921
																												279.528	340.288		292.223	304.891
																												242.558	286.188		318.848	327.36
																												287.701	275.763		351.329	280.575
																												260.504	315.68		245.522	316.956
																												240.643	240.268		310.177	314.055
																												273.604	327.87		279.824	213.462
																												258.563	208.233		293.349	266.88
																												267.657	243.412		227.172	207.687
																												317.397	275.03		235.058	299.19
																												248.899	275.708		305.874	383.309
																												317.799	238.138		256.924	269.684
																												268.896	265.761		349.522	272.415
																												333.348	261.894		262.46	312.687
																												265.713	319.784		211.474	207.829
																												250.066	180.62		232.107	209.353
																												379.419	298.665		278.532	280.732
																												270.483	360.584		230.139	290.405
																												315.18	336.494		292.616	243.814
																												262.6	288.395		259.298	335.893
																												253.86	303.509		359.792	366.259
																												245.577	259.915		241.893	305.292
																												287.984	259.944		330.129	308.639
																												329.707	226.84		272.419	268.466
																												270.187	197.887		282.176	303.163
																												246.226	249.33		270.611	298.395
																												233.8	210.421		257.083	261.417
																												216.306	280.146		237.967	272.525
																												254.007	250.9		270.847	293.881
																												246.341	248.219		276.405	322.607
																												244.239	215.086		292.098	238.394
																												221.469	186.146		285.548	225.381
																												355.968	253.414		245.815	232.353
																												235.547	247.541		302.381	246.559
																												217.455	281.162		257.698	211.56
																												241.528	326.638		286.391	234.675
																												268.748	355.461		270.301	248.017
																												380.865	388.071		280.385	293.038
																												288.194	278.389		291.045	277.845
																												242.428	333.871		271.435	231.289
																												262.988	257.545		212.343	234.013
																												301.972	223.22		223.768	215.368
																												237.437	178.97		239.25	188.209
																												258.009	223.368		280.314	329.21
																												277.919	245.902		264.988	228.552
																												245.165	303.096		222.155	152.398
																												222.289	212.465		230.673	214.42
																												217.918	172.61		299.489	339.098
																												230.924	254.111		206.512	211.66
																												311.189	298.928		233.265	309.783
																												273.077	242.868		283.64	280.933
																												232.446	263.968		209.794	268.161
																												251.137	214.458		262.263	267.904
																												226.693	195.05		216.429	180.657
																												339.567	349.553		226.644	285.021
																												251.685	209.184		297.212	297.871
																												269.577	215.695		248.444	184.901
																												275.297	230.332		218.6	201.523
																												261.358	192.271		207.937	231.894
																												270.898	222.095		220.823	155.7
																												265.061	221.727		216.095	267.714
																												252.957	210.458		207.305	229.6
																												298.8	264.033		218.299	249.03
																												219.006	184.949		217.504	147.841
																												227.461	260.513		214.011	215.427
																												309.824	220.405		239.631	271.05
																												337.997	249.155		278.324	179.391
																												292.812	186.007
																												210.456	148.629
																												255.076	200.561

## Sheet: Figure 4
Figure 4A: Cox10 mRNA levels (normalized)					Figure 4C: Complex IV activity (pmol/min)					Figure 4F: Liver Weight / Body Weight (%)					Figure 4G: Fasting Plasma Glucose (mg/dL)					Figure 4H: Plasma glucose (normalized, %)						Figure 4I: Fractional Gluconeogenesis					Figure 4J: Total Protein (g/dL), Albumin (g/dL), Total Bilirubin (mg/dL)								Figure 4K: ALT (U/L), AST (U/L)
	cox10f/f	cox10-/-				cox10f/f	cox10-/-				cox10f/f	cox10-/-				cox10f/f	cox10-/-				cox10f/f						cox10f/f	cox10-/-				Total Protein				Albumin				ALT (U/L)
	0.564009	0.092931				83.18	22.8461				4.56621	4.329				110.6	106.1				0 min	10 min	20 min	30 min			0.87445	0.666757				cox10f/f	cox10-/-			cox10f/f	cox10-/-			cox10f/f	cox10-/-
	0.991831	0.153314				48.3759	20.2313				4.34286	6.92308				108.4	67.9				100	152.381	189.286	186.905			0.886463	0.735922				5.52	5			2.79	3.25			16	45
	0.619869	0.136442				72.6802	18.8147				4.73684	7.48299				114.7	90.1				100	144.286	237.143	214.286			0.938125	0.699091				5.5	4.37			2.91	2.16			21	121
	1.82429	0.081394				62.0909	17.0793				3.69427	6.16438				115.5	59.9				100	139.024	148.78	158.537			0.890377	0.407237				5.61	4.55			2.86	2.43			16	132
		0.129662				56.1743	16.1073				4.62185	4.71698				100.2	82.6				100	151.042	157.292	157.292				0.777647				5.38	5.12			2.82	2.55			31	80
							24.176				3.83721	6.01227				105.5	50.3															5.55	4.88			2.77	2.66			38	226
Mean	1	0.118749									3.0625	5.38961					55.5									Mean	0.897354	0.657331
St. Dev.	0.58141	0.0303679			Mean	64.5003	19.8758													Mean	100	146.683	183.125	179.255		St. Dev.	0.0280129	0.145801			Mean	5.512	4.784		Mean	2.83	2.61		Mean	24.4	120.8
n	4	5			St. Dev.	13.7019	3.18084			Mean	4.12311	5.85976			Mean	109.15	73.2			St. Dev.	0	6.21468	40.0116	27.0636		n	4	5			St. Dev.	0.0846759	0.314213		St. Dev.	0.0561249	0.403299		St. Dev.	9.76217	68.196
					n	5	6			St. Dev.	0.613809	1.13665			St. Dev.	5.78299	20.4086			n	4	4	4	4							n	5	5		n	5	5		n	5	5
										n	7	7			n	6	7
																					cox10-/-											Total Bilirubin								AST (U/L)
																					0 min	10 min	20 min	30 min								cox10f/f	cox10-/-							cox10f/f	cox10-/-
																					100	112.987	111.688	107.792								0	0.5							82	465
																					100	139.286	117.857	124.107								0	0.2							98	330
																					100	104.854	111.65	108.738								0.19	0.42							81	344
																					100	139.362	100	84.0426								0.11	0.12							108	667
																					100	96.1539	89.2308	83.8461								0	0.29							130	283
																				Mean	100	118.529	106.085	101.705							Mean	0.06	0.306						Mean	99.8	417.8
																				St. Dev.	0	19.8947	11.4242	17.459							St. Dev.	0.0868907	0.155499						St. Dev.	20.3273	154.641
																				n	5	5	5	5							n	5	5						n	5	5

## Sheet: Figure 5
Figure 5A: ATP (nmol/mg)				Figure 5B: GSH/GSSG				Figure 5C: NAD+/NADH, NADPH/NADP+					Figure 5D: pyruvate/lactate, acetoacetate/b-hydroxybutyrate (normalized)								Figure 5E: Tissue a-hydroxybutyrate, Plasma a-hydroxybutyrate (normalized)								Figure 5J: Relative Protein amount (vs. actin)					Figure 5K: mtDNA/nDNA				Figure 5N: Metabolite Abundances (normalized)
	cox10f/f	cox10-/-			cox10f/f	cox10-/-			NAD+/NADH					pyruvate/lactate				acetoacetate/b-hydroxybutyrate				Tissue a-hydroxybutyrate				Plasma a-hydroxybutyrate				Tomm20					cox10f/f	cox10-/-			pyruvate				alanine
	7.85926	7.74361			3.16451	2.70872			cox10f/f	cox10-/-				cox10f/f	cox10-/-			cox10f/f	cox10-/-			cox10f/f	cox10-/-			cox10f/f	cox10-/-			cox10f/f	cox10-/-				1194.71	2734.67			cox10f/f	cox10-/-			cox10f/f	cox10-/-
	9.38889	3.28494			2.82146	2.5796			7.15433	2.20739				1.16582	0.422232			0.740762	0.565166			1.04071	0.376682			1.06756	0.523296			0.777668	3.4296				830.311	1327.31			1.01873	0.405802			1.11923	3.19049
	3.81826	4.0134			2.58462	1.73271			4.70291	2.59232				0.814074	0.253259			0.684048	0.636684			1.46146	0.710207			1.14964	0.79154			2.3612	2.38837				1106.86	2173.45			0.929024	0.25846			1.10018	0.846126
					2.70143	2.79058			4.7493	1.28274				1.06913	1.09623			1.41407	0.399973			0.847177	0.441868			1.16546	0.684652			0.707422	3.20315				1139.21	2970			0.861192	0.65503			0.649155	0.552042
Mean	7.02213	5.01398			3.00783	2.30219			4.4405	3.52294				1.07913	0.582139			0.909279	0.580281			0.650647	0.276194			0.617339	0.819999			0.153714	1.53687				954.821	2953.92			0.900581	0.502829			1.0959	1.20939
St. Dev.	2.87812	2.39182				1.45874			5.69884	2.78374				0.871846	0.474428			1.25184	0.419694				0.418338				0.705039								1087.67	795.8			1.29047	0.444418			1.03553	1.02124
n	3	3								5.23752					0.751504														Mean	1	2.6395				1484.11	2724.73				0.527118				0.876831
				Mean	2.85597	2.26209															Mean	1	0.444658		Mean	1	0.704905		St. Dev.	0.949401	0.860394				1254.78	2741.59
				St. Dev.	0.232896	0.548965		Mean	5.34918	2.93778			Mean	1	0.596632		Mean	1	0.52036		St. Dev.	0.346414	0.161414		St. Dev.	0.258691	0.116345		n	4	4				1233.93	1979.34		Mean	1	0.465609		Mean	1	1.28269
				n	5	6		St. Dev.	1.11625	1.34513			St. Dev.	0.149607	0.295651		St. Dev.	0.320211	0.10459		n	4	5		n	4	5											St. Dev.	0.17242	0.132654		St. Dev.	0.198623	0.959438
								n	5	6			n	5	6		n	5	5											PC				Mean	1142.93	2266.76		n	5	6		n	5	6
																														ndufa9f/f	ndufa9-/-			St. Dev.	186.2	771.239
									NADPH/NADP+																					1.01782	3.03335			n	9	9			lactate				citrate
									cox10f/f	cox10-/-																				1.64649	2.74493								cox10f/f	cox10-/-			cox10f/f	cox10-/-
									1.51275	1.82424																				0.793482	1.21786								0.850815	0.935776			0.940712	1.28633
									2.08255	1.75578																				0.542207	1.98193								1.11115	0.993657			1.11504	1.28773
									2.09739	2.37499																													0.784294	0.581793			0.823758	0.803479
									1.93042	1.88616																			Mean	1	2.24452								0.812564	0.841012			1.07495	1.09062
									2.00028	1.73117																			St. Dev.	0.472755	0.815609								1.44118	0.912073			1.04554	1.02572
										1.67143																			n	4	4									0.682944				0.838905
								Mean	1.92468	1.87396																												Mean	1	0.824543		Mean	1	1.05546
								St. Dev.	0.239889	0.256524																												St. Dev.	0.278797	0.159927		St. Dev.	0.117794	0.209648
								n	5	6																												n	5	6		n	5	6
																																							2-hydroxyglutarate				glutamate
																																							cox10f/f	cox10-/-			cox10f/f	cox10-/-
																																							0.814141	2.70412			0.722715	1.62209
																																							0.969345	2.29859			1.26468	1.17114
																																							1.34801	0.763123			1.22088	1.06888
																																							0.898923	1.58916			1.09323	1.49325
																																							0.969578	2.36529			0.698504	1.70296
																																								2.6941				0.968017
																																						Mean	1	2.06906		Mean	1	1.33772
																																						St. Dev.	0.20478	0.757651		St. Dev.	0.271716	0.308273
																																						n	5	6		n	5	6
																																							succinate				fumarate
																																							cox10f/f	cox10-/-			cox10f/f	cox10-/-
																																							1.03875	1.26001			0.443689	2.91239
																																							1.02293	1.03591			1.72622	1.03913
																																							1.16637	0.492584			1.47733	0.149126
																																							0.869245	1.00539			0.730387	0.68768
																																							0.902707	1.13857			0.622369	0.656746
																																								0.735605				0.624699
																																						Mean	1	0.944678		Mean	1	1.01163
																																						St. Dev.	0.118606	0.281829		St. Dev.	0.565691	0.973462
																																						n	5	6		n	5	6
																																							malate
																																							cox10f/f	cox10-/-
																																							0.938019	1.52385
																																							1.15305	0.994304
																																							0.939627	0.723131
																																							0.910204	0.893512
																																							1.0591	0.937752
																																								0.900391
																																						Mean	1	0.99549
																																						St. Dev.	0.103036	0.27427
																																						n	5	6

## Sheet: Figure 5 - fs4
Figure 5 - figure supplement 4A: Metabolite Abundances (normalized)								Figure 5 - figure supplement 4B: Metabolite Abundances (normalized)
	cholate				deoxycholate				pyruvate				lactate
	cox10f/f	cox10-/-			cox10f/f	cox10-/-			cox10f/f	cox10-/-			cox10f/f	cox10-/-
	1.673	35.2834			0.212657	5.69119			1.01873	0.405802			0.850815	0.935776
	0.670466	35.9597			1.18452	29.0467			0.929024	0.25846			1.11115	0.993657
	2.05915	86.0797			3.25812	29.9023			0.861192	0.65503			0.784294	0.581793
	0.390032	26.6701			0.130564	7.05805			0.900581	0.502829			0.812564	0.841012
	0.207353	42.2644			0.214147	17.2243			1.29047	0.444418			1.44118	0.912073
		36.7991				54.0189				0.527118				0.682944
Mean	1	43.8427		Mean	1	23.8236		Mean	1	0.465609		Mean	1	0.824543
St. Dev.	0.819096	21.2902		St. Dev.	1.33478	18.0522		St. Dev.	0.17242	0.132654		St. Dev.	0.278797	0.159927
n	5	6		n	5	6		n	5	6		n	5	6
	chenodeoxycholate				hyodeoxycholate				acetoacetate				b-hydroxybutyrate
	cox10f/f	cox10-/-			cox10f/f	cox10-/-			cox10f/f	cox10-/-			cox10f/f	cox10-/-
	0.203075	4.69321			0.435371	4.09754			0.823331	0.443911			0.807693	0.781958
	0.96441	23.765			0.371346	17.9136			0.662722	0.408192			0.915928	0.419187
	2.71905	24.4284			3.00414	41.8429			1.07362	0.467219			0.620893	0.306775
	0.11346	5.76417			0.18914	9.68591			0.561233	0.267308			1.65549	0.231808
		14.0832				27.6132			1.87909	0.43281				0.380703
		44.1458				95.2434
Mean	1	19.48		Mean	1	32.7328		Mean	1	0.403888		Mean	1	0.424086
St. Dev.	1.20795	14.7455		St. Dev.	1.34016	33.4291		St. Dev.	0.528135	0.0792492		St. Dev.	0.453664	0.212551
n	4	6		n	4	6		n	5	5		n	4	5
	muricholate				murideoxycholate				a-ketobutyrate				a-hydroxybutyrate
	cox10f/f	cox10-/-			cox10f/f	cox10-/-			cox10f/f	cox10-/-			cox10f/f	cox10-/-
	1.28359	11.5083			0.57143	4.86679			1.08862	0.968968			1.04071	0.376682
	0.840419	22.0297			0.500941	21.3022			1.05869	0.409779			1.46146	0.710207
	2.3666	41.4622			3.57689	50.0415			0.742868	0.738217			0.847177	0.441868
	0.341332	19.7415			0.258526	11.4356			1.10983	0.400255			0.650647	0.276194
	0.168053	39.81			0.092213	35.4166				0.940525				0.418338
		43.5093				114.065
Mean	1	29.6768		Mean	1	39.5212		Mean	1	0.691549		Mean	1	0.444658
St. Dev.	0.880266	13.5661		St. Dev.	1.45318	40.0148		St. Dev.	0.1727	0.276304		St. Dev.	0.346414	0.161414
n	5	6		n	5	6		n	4	5		n	4	5
	ursocholate				ursodeoxycholate				ascorbate				BH4
	cox10f/f	cox10-/-			cox10f/f	cox10-/-			cox10f/f	cox10-/-			cox10f/f	cox10-/-
	3.98541	17.9375			0.435264	4.0988			1.08627	0.504896			0.944042	0.461015
	0.174768	28.8491			0.37132	17.9079			0.956535	0.290293			1.07977	0.174375
	0.425243	25.5892			3.00429	41.8381			0.898305	0.543347			1.45645	0.384423
	0.157872	50.8813			0.189127	9.68356			0.889899	0.434405			0.647478	0.253448
	0.256707	35.2171				28.6651			1.16899	0.480823			0.872255	0.324348
		55.9457				95.2372				0.454392				0.31681
Mean	1	35.7367		Mean	1	32.9051		Mean	1	0.451359		Mean	1	0.31907
St. Dev.	1.67225	14.8678		St. Dev.	1.34026	33.3977		St. Dev.	0.122835	0.0876756		St. Dev.	0.299346	0.0996948
n	5	6		n	4	6		n	5	6		n	5	6
	dihydroxy-oxo-cholanoate				hydroxy-oxo-cholest-enoate				N-acetyl cysteine
	cox10f/f	cox10-/-			cox10f/f	cox10-/-			cox10f/f	cox10-/-
	4.2534	39.6563			0.589557	3.14453			0.653264	0.614989
	0.143211	46.3852			0.919227	9.67895			1.36504	0.684466
	0.361783	16.0281			2.10102	19.4665			0.883587	0.332404
	0.087525	57.3436			0.610243	4.80439			0.917836	0.446918
	0.154078	58.9916			0.779948	5.67818			1.18027	0.494418
		59.8901				10.4381				0.697367
Mean	1	46.3825		Mean	1	8.86845		Mean	1	0.545094
St. Dev.	1.82169	16.901		St. Dev.	0.629995	5.91435		St. Dev.	0.276714	0.144873
n	5	6		n	5	6		n	5	6

[truncated: 4 more sheets: Figure 5 - fs5, Figure 5 - fs6, Figure 5 - fs7, Figure 6]
