# Supplementary figures and images for: Differential requirements for mitochondrial electron transport chain components in the adult murine liver
Source: eLife journal article supplement (doi:10.7554/elife.80919), 2022-09-26

Fig. 1B - Ndufa9

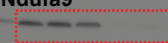

Fig. 1B -  $\beta$ 2M

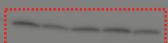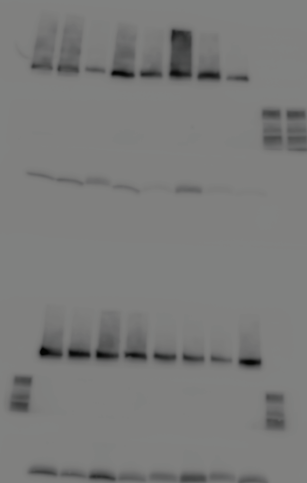

Supplement: fig1-data1 [file elife-80919-fig1-data1-v2.zip]

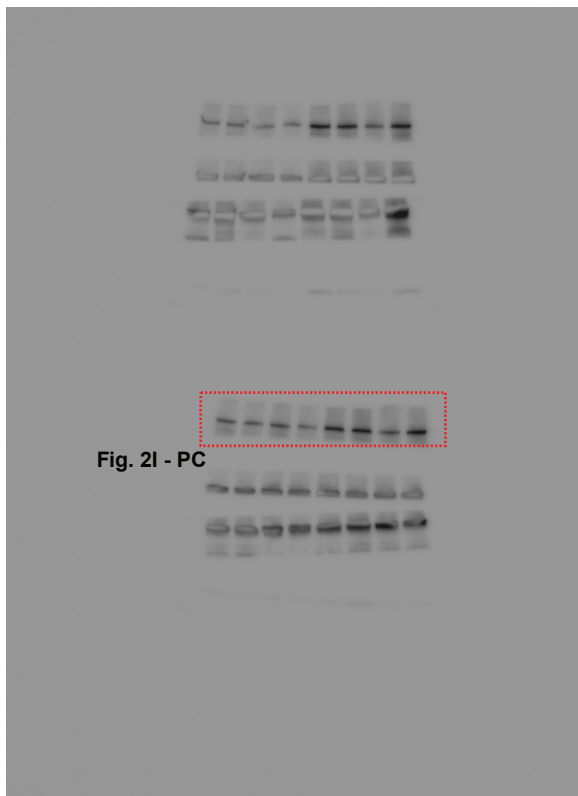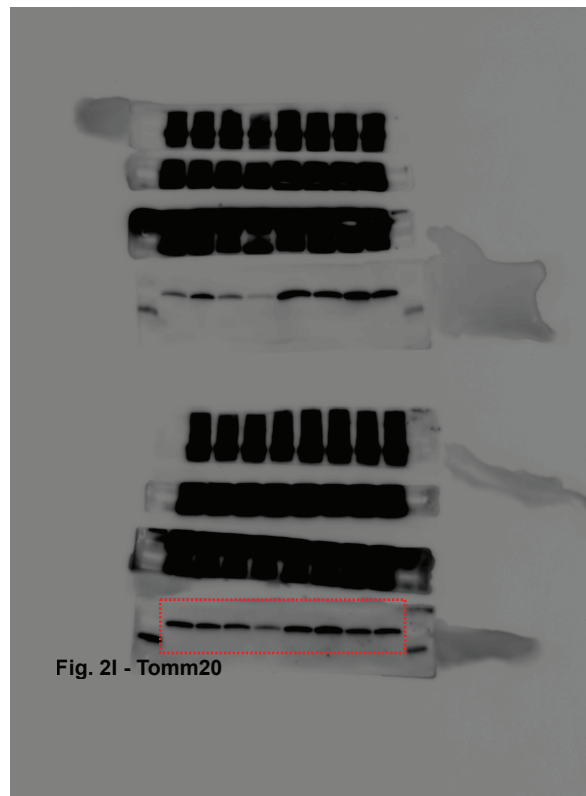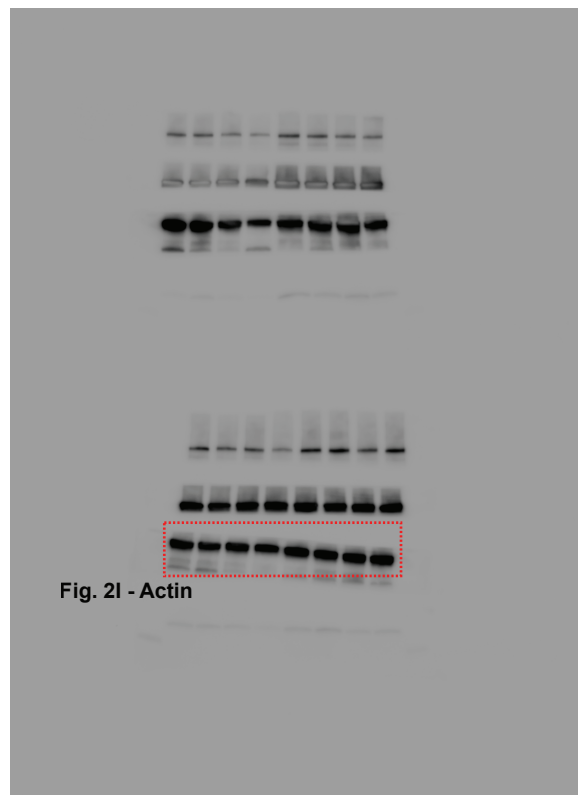

Supplement: fig2-data1 [file elife-80919-fig2-data1-v2.zip]

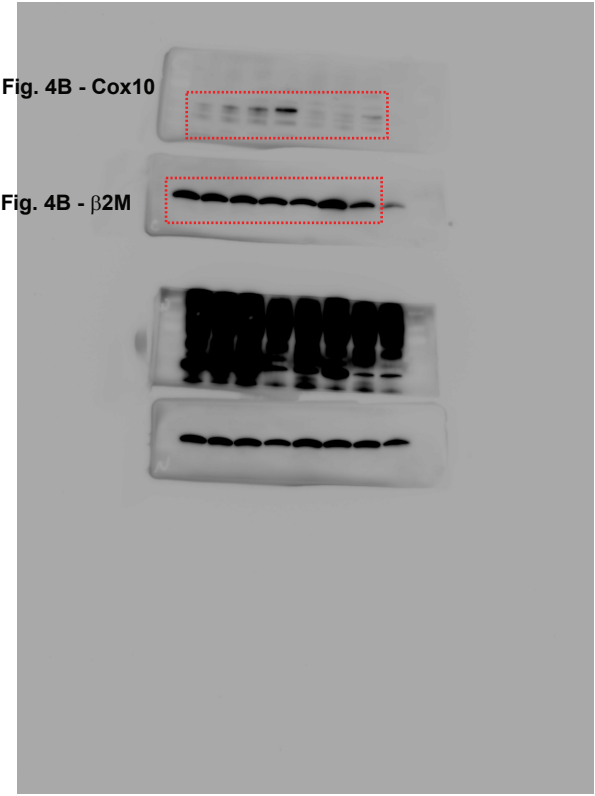

Supplement: fig4-data1 [file elife-80919-fig4-data1-v2.zip]

Fig. 5I - PC

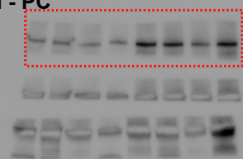

Fig. 5I - Tomm20

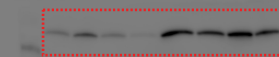

Fig. 5I - Actin

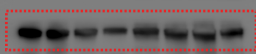

Supplement: fig5-data1 [file Figure 5 - source data file 1.pdf › Figure 5 - source data 1/Figure 5 - source data file 1.pdf]
